# Supplementary material for: Suprabasal cells retaining stem cell identity programs drive basal cell hyperplasia in eosinophilic esophagitis
Source: PubMed Central journal article supplement (PMC10153277; doi:10.1101/2023.04.20.537495), 2023-04-20
Supplement: media-2.pdf [file media-2.pdf]

## Supplemental Tables

Clevenger, MH, *et al.* Suprabasal cells retaining stem cell identity programs drive basal cell hyperplasia in Eosinophilic Esophagitis

### Table of Contents

|                                                                                                                                               |        |
|-----------------------------------------------------------------------------------------------------------------------------------------------|--------|
| <b>Supplemental Table 1.</b> Genes included in the quiescent gene signature. ....                                                             | pg 2   |
| <b>Supplemental Table 2.</b> Genes included in the superficial gene signature. ....                                                           | pg 5   |
| <b>Supplemental Table 3.</b> Genes corresponding to co-expressed modules along the EoE epithelial pseudotemporal trajectory.....              | pg 8   |
| <b>Supplemental Table 4.</b> Gene expression profile of module 7 genes in EoE vs healthy subjects. ....                                       | pg 25  |
| <b>Supplemental Table 5.</b> Identification of SOX2 and/or KLF5 downstream targets from Enrichr databases and literature-based analyses. .... | pg 27  |
| <b>Supplemental Table 6.</b> Module 7 genes known to be regulated by SOX2-KLF5. ....                                                          | pg 167 |
| <b>Supplemental Table 7.</b> Gene expression profile of upregulated EoE DEGs known to be regulated by SOX2 and/or KLF5. ....                  | pg 168 |
| <b>Supplemental Table 8.</b> Gene expression profile of EoE DEGs known to be regulated by the SOX2-KLF5 interaction.....                      | pg 191 |
| <b>Supplemental Table 9.</b> List of antibodies used in the study. ....                                                                       | pg 196 |

**Supplemental Table 1.** Genes included in the quiescent gene signature.

|          | p_val | avg_log2FC  | pct.1 | pct.2 | p_val_adj |
|----------|-------|-------------|-------|-------|-----------|
| DST      | 0     | 2.829762397 | 0.937 | 0.211 | 0         |
| KRT15    | 0     | 2.749389646 | 1     | 0.685 | 0         |
| KRT19    | 0     | 2.027514439 | 0.99  | 0.662 | 0         |
| GAS5     | 0     | 1.991027262 | 0.727 | 0.641 | 0         |
| CXCL14   | 0     | 1.930840409 | 0.497 | 0.095 | 0         |
| MIR205HG | 0     | 1.681103048 | 0.728 | 0.686 | 0         |
| TXNIP    | 0     | 1.679755517 | 0.787 | 0.396 | 0         |
| IL1R2    | 0     | 1.641511831 | 0.619 | 0.063 | 0         |
| IL18     | 0     | 1.616816891 | 0.9   | 0.729 | 0         |
| ZFP36L2  | 0     | 1.608479362 | 0.823 | 0.526 | 0         |
| IFITM3   | 0     | 1.606175204 | 0.858 | 0.54  | 0         |
| GPNMB    | 0     | 1.602788604 | 0.741 | 0.217 | 0         |
| CAV1     | 0     | 1.57258403  | 0.693 | 0.127 | 0         |
| IGFBP5   | 0     | 1.564140033 | 0.586 | 0.14  | 0         |
| GPX4     | 0     | 1.556344306 | 0.955 | 0.852 | 0         |
| MT-ND2   | 0     | 1.541729919 | 0.95  | 0.884 | 0         |
| COL17A1  | 0     | 1.504913141 | 0.68  | 0.1   | 0         |
| MALAT1   | 0     | 1.497386787 | 0.975 | 0.92  | 0         |
| TSLP     | 0     | 1.492823424 | 0.61  | 0.088 | 0         |
| FOS      | 0     | 1.469149928 | 0.977 | 0.939 | 0         |
| FTH1     | 0     | 1.451440638 | 0.972 | 0.929 | 0         |
| SLC3A2   | 0     | 1.428585636 | 0.811 | 0.576 | 0         |
| MT-ND1   | 0     | 1.425711156 | 0.953 | 0.891 | 0         |
| MT-ND3   | 0     | 1.409695337 | 0.967 | 0.922 | 0         |
| MT-CYB   | 0     | 1.374772617 | 0.979 | 0.933 | 0         |
| ATF3     | 0     | 1.369038577 | 0.828 | 0.673 | 0         |
| ATP1B3   | 0     | 1.315243129 | 0.871 | 0.741 | 0         |
| MT-ATP6  | 0     | 1.308089875 | 0.969 | 0.922 | 0         |
| SNHG8    | 0     | 1.296775833 | 0.926 | 0.798 | 0         |
| FHL2     | 0     | 1.288653373 | 0.659 | 0.194 | 0         |
| MT-CO3   | 0     | 1.262818148 | 0.977 | 0.944 | 0         |
| RPL34    | 0     | 1.252450795 | 1     | 0.994 | 0         |
| C12orf57 | 0     | 1.251320924 | 0.864 | 0.712 | 0         |
| ZFAS1    | 0     | 1.239408574 | 0.965 | 0.911 | 0         |
| CH25H    | 0     | 1.196781019 | 0.496 | 0.051 | 0         |
| DLK2     | 0     | 1.177325313 | 0.524 | 0.032 | 0         |
| NOP53    | 0     | 1.162744015 | 0.822 | 0.724 | 0         |
| MT-ND5   | 0     | 1.162255222 | 0.889 | 0.81  | 0         |
| SNHG7    | 0     | 1.141464301 | 0.756 | 0.639 | 0         |
| ASS1     | 0     | 1.110706576 | 0.554 | 0.123 | 0         |
| TSC22D1  | 0     | 1.091835855 | 0.546 | 0.305 | 0         |
| NAP1L1   | 0     | 1.090727748 | 0.812 | 0.664 | 0         |
| CD81     | 0     | 1.085738797 | 0.753 | 0.571 | 0         |
| NPR3     | 0     | 1.085345049 | 0.547 | 0.171 | 0         |
| CTNNAL1  | 0     | 1.0784772   | 0.52  | 0.054 | 0         |

|              |   |             |       |       |   |
|--------------|---|-------------|-------|-------|---|
| THSD4        | 0 | 1.075858062 | 0.567 | 0.254 | 0 |
| SNHG29       | 0 | 1.070984512 | 0.734 | 0.772 | 0 |
| EEF1D        | 0 | 1.069898077 | 0.98  | 0.945 | 0 |
| RPS27        | 0 | 1.058941417 | 1     | 0.994 | 0 |
| WNT4         | 0 | 1.051182329 | 0.588 | 0.419 | 0 |
| CIRBP        | 0 | 1.048393598 | 0.85  | 0.799 | 0 |
| RACK1        | 0 | 1.044522976 | 1     | 0.99  | 0 |
| MT-ND4       | 0 | 1.044313515 | 0.963 | 0.917 | 0 |
| LAMB3        | 0 | 1.044175468 | 0.558 | 0.166 | 0 |
| RPL10        | 0 | 1.04270105  | 1     | 0.998 | 0 |
| RPL30        | 0 | 1.041514408 | 1     | 0.993 | 0 |
| ITGB1        | 0 | 1.038297217 | 0.623 | 0.389 | 0 |
| RPL5         | 0 | 1.027958819 | 1     | 0.992 | 0 |
| LIMA1        | 0 | 1.019869097 | 0.605 | 0.379 | 0 |
| EPB41L4A-AS1 | 0 | 1.015005509 | 0.646 | 0.384 | 0 |
| RPS9         | 0 | 0.997767959 | 1     | 0.993 | 0 |
| SLC1A3       | 0 | 0.989165554 | 0.48  | 0.093 | 0 |
| RPL13        | 0 | 0.986841391 | 1     | 0.998 | 0 |
| SLC7A1       | 0 | 0.985424125 | 0.624 | 0.378 | 0 |
| RPS4X        | 0 | 0.977786324 | 1     | 0.997 | 0 |
| SLC7A5       | 0 | 0.959832268 | 0.522 | 0.109 | 0 |
| RPL12        | 0 | 0.954870183 | 1     | 0.996 | 0 |
| APP          | 0 | 0.934912332 | 0.515 | 0.196 | 0 |
| RPS3         | 0 | 0.933890118 | 1     | 0.996 | 0 |
| EIF3E        | 0 | 0.929264383 | 0.951 | 0.911 | 0 |
| ARPC1B       | 0 | 0.92852849  | 0.531 | 0.218 | 0 |
| RPL35A       | 0 | 0.926635559 | 1     | 0.992 | 0 |
| RPS5         | 0 | 0.917666457 | 1     | 0.991 | 0 |
| MT-CO1       | 0 | 0.910015039 | 0.988 | 0.958 | 0 |
| RPLP1        | 0 | 0.907581937 | 1     | 0.999 | 0 |
| NPM1         | 0 | 0.900359763 | 0.99  | 0.957 | 0 |
| RPL37        | 0 | 0.895612447 | 1     | 0.995 | 0 |
| RPL10A       | 0 | 0.894123777 | 1     | 0.991 | 0 |
| PDLIM1       | 0 | 0.892139816 | 0.832 | 0.788 | 0 |
| MTRNR2L8     | 0 | 0.887226548 | 0.519 | 0.487 | 0 |
| RPS19        | 0 | 0.884909432 | 1     | 0.997 | 0 |
| JUNB         | 0 | 0.884094259 | 0.855 | 0.863 | 0 |
| TP53AIP1     | 0 | 0.88224727  | 0.539 | 0.237 | 0 |
| MT2A         | 0 | 0.876672684 | 0.81  | 0.535 | 0 |
| TIMP1        | 0 | 0.87575402  | 0.462 | 0.104 | 0 |
| RPS21        | 0 | 0.873160764 | 0.998 | 0.988 | 0 |
| HNRNPA1      | 0 | 0.872899675 | 0.92  | 0.885 | 0 |
| RPL3         | 0 | 0.869343675 | 1     | 0.996 | 0 |
| PNRC1        | 0 | 0.852584474 | 0.736 | 0.703 | 0 |
| RPS15A       | 0 | 0.84947814  | 1     | 0.992 | 0 |
| MT-ND4L      | 0 | 0.849387461 | 0.61  | 0.566 | 0 |
| RPL18A       | 0 | 0.845159597 | 1     | 0.996 | 0 |

|        |   |             |       |       |   |
|--------|---|-------------|-------|-------|---|
| BTF3   | 0 | 0.843251407 | 0.996 | 0.977 | 0 |
| RPL11  | 0 | 0.841695911 | 1     | 0.997 | 0 |
| KTN1   | 0 | 0.83970417  | 0.826 | 0.813 | 0 |
| RPL19  | 0 | 0.839507184 | 1     | 0.996 | 0 |
| POLR1D | 0 | 0.839246533 | 0.838 | 0.823 | 0 |
| MT-CO2 | 0 | 0.836466386 | 0.987 | 0.961 | 0 |
| EGR1   | 0 | 0.835157992 | 0.808 | 0.764 | 0 |
| RPL32  | 0 | 0.833150593 | 1     | 0.998 | 0 |

**Supplemental Table 2.** Genes included in the superficial gene signature.

|           | p_val | avg_log2FC | pct.1 | pct.2 | p_val_adj |
|-----------|-------|------------|-------|-------|-----------|
| CRCT1     | 0     | 6.663212   | 0.998 | 0.407 | 0         |
| CNFN      | 0     | 5.997242   | 1     | 0.526 | 0         |
| KRT78     | 0     | 5.298534   | 0.994 | 0.27  | 0         |
| SPRR2D    | 0     | 5.277972   | 0.848 | 0.364 | 0         |
| LYPD2     | 0     | 5.240213   | 0.992 | 0.242 | 0         |
| FAM25A    | 0     | 5.213557   | 0.968 | 0.284 | 0         |
| ECM1      | 0     | 5.109232   | 0.998 | 0.372 | 0         |
| MT1G      | 0     | 5.034033   | 0.678 | 0.372 | 0         |
| SPINK7    | 0     | 4.961649   | 0.939 | 0.18  | 0         |
| SPRR2A    | 0     | 4.84788    | 0.952 | 0.567 | 0         |
| TMPRSS11l | 0     | 4.762629   | 0.995 | 0.135 | 0         |
| FTH1      | 0     | 4.539188   | 0.999 | 0.952 | 0         |
| MAL       | 0     | 4.438548   | 1     | 0.571 | 0         |
| HOPX      | 0     | 4.340964   | 0.997 | 0.708 | 0         |
| CRISP3    | 0     | 4.325306   | 0.977 | 0.083 | 0         |
| FLG       | 0     | 4.244267   | 0.598 | 0.052 | 0         |
| C15orf48  | 0     | 4.127274   | 0.971 | 0.131 | 0         |
| LCN2      | 0     | 4.051988   | 0.973 | 0.343 | 0         |
| ERO1A     | 0     | 4.01261    | 0.981 | 0.314 | 0         |
| SPRR2E    | 0     | 3.96558    | 0.749 | 0.288 | 0         |
| CRNN      | 0     | 3.951264   | 0.999 | 0.386 | 0         |
| EMP1      | 0     | 3.933291   | 0.999 | 0.692 | 0         |
| PSCA      | 0     | 3.913357   | 0.941 | 0.127 | 0         |
| S100P     | 0     | 3.784702   | 0.879 | 0.116 | 0         |
| MUC21     | 0     | 3.777149   | 0.994 | 0.282 | 0         |
| ADIRF     | 0     | 3.759468   | 0.97  | 0.538 | 0         |
| SPRR3     | 0     | 3.743638   | 1     | 0.859 | 0         |
| PHLDA1    | 0     | 3.551732   | 0.941 | 0.11  | 0         |
| PRSS27    | 0     | 3.295138   | 0.983 | 0.179 | 0         |
| SCEL      | 0     | 3.236097   | 0.99  | 0.397 | 0         |
| MXD1      | 0     | 3.197818   | 0.97  | 0.203 | 0         |
| TGM3      | 0     | 3.127514   | 0.988 | 0.308 | 0         |
| CYSRT1    | 0     | 3.101654   | 0.981 | 0.343 | 0         |
| TMPRSS11l | 0     | 3.0563     | 0.976 | 0.197 | 0         |
| C4orf3    | 0     | 3.050302   | 0.993 | 0.75  | 0         |
| PPL       | 0     | 2.852725   | 0.987 | 0.475 | 0         |
| MT2A      | 0     | 2.842034   | 0.718 | 0.718 | 0         |
| MT1H      | 0     | 2.835812   | 0.356 | 0.113 | 0         |
| LMO7      | 0     | 2.834769   | 0.954 | 0.297 | 0         |
| AIF1L     | 0     | 2.79036    | 0.942 | 0.117 | 0         |
| SPRR1B    | 0     | 2.708646   | 0.809 | 0.324 | 0         |
| CSTB      | 0     | 2.708364   | 1     | 0.949 | 0         |
| SAMD9     | 0     | 2.691807   | 0.944 | 0.317 | 0         |
| SLURP2    | 0     | 2.682477   | 0.855 | 0.289 | 0         |
| NCCRP1    | 0     | 2.681409   | 0.976 | 0.211 | 0         |

|          |   |          |       |       |   |
|----------|---|----------|-------|-------|---|
| CAMK2N1  | 0 | 2.669605 | 0.91  | 0.027 | 0 |
| TTC9     | 0 | 2.669186 | 0.948 | 0.196 | 0 |
| EPS8L1   | 0 | 2.658087 | 0.956 | 0.113 | 0 |
| SPINK5   | 0 | 2.627968 | 0.999 | 0.692 | 0 |
| PPDPF    | 0 | 2.562754 | 0.997 | 0.881 | 0 |
| TIMP2    | 0 | 2.549921 | 0.855 | 0.033 | 0 |
| RNASE7   | 0 | 2.530436 | 0.533 | 0.024 | 0 |
| IL1RN    | 0 | 2.528854 | 0.993 | 0.576 | 0 |
| NIBAN2   | 0 | 2.474299 | 0.818 | 0.354 | 0 |
| DUSP5    | 0 | 2.450672 | 0.845 | 0.114 | 0 |
| SAT1     | 0 | 2.424409 | 0.988 | 0.789 | 0 |
| MT1M     | 0 | 2.422127 | 0.292 | 0.094 | 0 |
| S100A9   | 0 | 2.421643 | 1     | 0.921 | 0 |
| MYL12A   | 0 | 2.318397 | 0.99  | 0.844 | 0 |
| IL18     | 0 | 2.30016  | 0.983 | 0.784 | 0 |
| MUC1     | 0 | 2.283834 | 0.792 | 0.071 | 0 |
| TMOD3    | 0 | 2.271593 | 0.974 | 0.598 | 0 |
| C6orf132 | 0 | 2.250125 | 0.957 | 0.427 | 0 |
| FAM3D    | 0 | 2.238508 | 0.9   | 0.195 | 0 |
| ELF3     | 0 | 2.224858 | 0.957 | 0.465 | 0 |
| KRT17    | 0 | 2.208477 | 0.553 | 0.312 | 0 |
| SH3BGRL2 | 0 | 2.205071 | 0.932 | 0.185 | 0 |
| SPNS2    | 0 | 2.190006 | 0.836 | 0.033 | 0 |
| KRT16    | 0 | 2.188358 | 0.754 | 0.32  | 0 |
| A2ML1    | 0 | 2.17596  | 0.973 | 0.392 | 0 |
| ANXA11   | 0 | 2.172568 | 0.972 | 0.567 | 0 |
| MT1E     | 0 | 2.162944 | 0.577 | 0.616 | 0 |
| H2AFJ    | 0 | 2.10223  | 0.976 | 0.626 | 0 |
| GCHFR    | 0 | 2.049766 | 0.862 | 0.369 | 0 |
| SFTA2    | 0 | 2.045811 | 0.877 | 0.094 | 0 |
| HILPDA   | 0 | 2.042208 | 0.575 | 0.27  | 0 |
| ADGRF1   | 0 | 1.991916 | 0.82  | 0.122 | 0 |
| ANXA1    | 0 | 1.954987 | 1     | 0.969 | 0 |
| MALL     | 0 | 1.943558 | 0.973 | 0.472 | 0 |
| SLURP1   | 0 | 1.937649 | 0.918 | 0.313 | 0 |
| RAB5IF   | 0 | 1.929411 | 0.949 | 0.625 | 0 |
| LGALS3   | 0 | 1.929329 | 0.995 | 0.937 | 0 |
| TAX1BP1  | 0 | 1.913211 | 0.967 | 0.576 | 0 |
| CLIC3    | 0 | 1.869309 | 0.959 | 0.415 | 0 |
| S100A8   | 0 | 1.853015 | 1     | 0.885 | 0 |
| PRSS3    | 0 | 1.82896  | 0.862 | 0.093 | 0 |
| CD59     | 0 | 1.819298 | 0.967 | 0.624 | 0 |
| CST6     | 0 | 1.818308 | 0.878 | 0.119 | 0 |
| GLUL     | 0 | 1.809864 | 0.676 | 0.435 | 0 |
| HPGD     | 0 | 1.807315 | 0.912 | 0.383 | 0 |
| KLK12    | 0 | 1.798359 | 0.635 | 0.175 | 0 |
| DHRS9    | 0 | 1.786528 | 0.711 | 0.018 | 0 |

|        |   |          |       |       |   |
|--------|---|----------|-------|-------|---|
| PLAC8  | 0 | 1.77181  | 0.734 | 0.2   | 0 |
| TMEM40 | 0 | 1.741066 | 0.963 | 0.511 | 0 |
| TPM4   | 0 | 1.723422 | 0.969 | 0.664 | 0 |
| SNCG   | 0 | 1.687185 | 0.721 | 0.053 | 0 |
| RIOK3  | 0 | 1.652756 | 0.952 | 0.626 | 0 |
| YOD1   | 0 | 1.652293 | 0.693 | 0.078 | 0 |
| SDCBP2 | 0 | 1.650459 | 0.91  | 0.32  | 0 |
| CD24   | 0 | 1.63871  | 0.99  | 0.564 | 0 |

**Supplemental Table 3.** Genes corresponding to co-expressed modules along the EoE epithelial pseudotemporal trajectory.

| gene        | module | supermodule | dim_1    | dim_2    | status | p_value   | morans_test_statistic | morans_l | q_value   |
|-------------|--------|-------------|----------|----------|--------|-----------|-----------------------|----------|-----------|
| 1 AC020916. | 1      | 1           | 1.63928  | -2.4881  | OK     | 0         | 251.3780328           | 0.254997 | 0         |
| 2 AC036176. | 1      | 1           | 1.684324 | -2.50395 | OK     | 0         | 126.1473819           | 0.127956 | 0         |
| 3 ADH1C     | 1      | 1           | 0.319839 | -3.03391 | OK     | 0         | 106.8289895           | 0.108348 | 0         |
| 4 ADM       | 1      | 1           | 0.86305  | -3.03058 | OK     | 0         | 143.3322682           | 0.14539  | 0         |
| 5 APCDD1    | 1      | 1           | 0.538908 | -2.4998  | OK     | 0         | 158.4539216           | 0.160729 | 0         |
| 6 APOBEC3A  | 1      | 1           | 2.50802  | -2.59125 | OK     | 0         | 144.5728216           | 0.146645 | 0         |
| 7 AREG      | 1      | 1           | 2.392676 | -2.62937 | OK     | 0         | 257.2458014           | 0.260948 | 0         |
| 8 ASS1      | 1      | 1           | 0.560633 | -2.9207  | OK     | 0         | 346.705388            | 0.351697 | 0         |
| 9 BASP1     | 1      | 1           | 0.282518 | -3.29634 | OK     | 0         | 237.0933783           | 0.240497 | 0         |
| 10 BCAM     | 1      | 1           | 0.46836  | -3.36526 | OK     | 0         | 257.5000892           | 0.261195 | 0         |
| 11 BHLHE40  | 1      | 1           | 2.382114 | -2.64325 | OK     | 0         | 276.6513126           | 0.280635 | 0         |
| 12 BMP2     | 1      | 1           | 0.852944 | -2.86915 | OK     | 0         | 105.7401336           | 0.107248 | 0         |
| 13 BST2     | 1      | 1           | -0.69009 | -2.77002 | OK     | 0         | 152.2795412           | 0.154464 | 0         |
| 14 BTG2     | 1      | 1           | 1.574787 | -2.56325 | OK     | 0         | 277.813387            | 0.281814 | 0         |
| 15 C1R      | 1      | 1           | -0.58559 | -2.93039 | OK     | 0         | 251.4742279           | 0.255083 | 0         |
| 16 CALML3   | 1      | 1           | 1.173151 | -1.42515 | OK     | 0         | 361.5015277           | 0.366709 | 0         |
| 17 CASC19   | 1      | 1           | 0.111581 | -2.18274 | OK     | 0         | 142.600573            | 0.144643 | 0         |
| 18 CAV1     | 1      | 1           | 0.098602 | -2.92218 | OK     | 0         | 514.6421679           | 0.522061 | 0         |
| 19 CAVIN2   | 1      | 1           | 0.909655 | -2.9257  | OK     | 0         | 119.7009119           | 0.121415 | 0         |
| 20 CCDC80   | 1      | 1           | 0.513994 | -2.90377 | OK     | 0         | 139.6095003           | 0.141599 | 0         |
| 21 CCL20    | 1      | 1           | 1.002225 | -2.64332 | OK     | 9.37E-292 | 36.48564812           | 0.036995 | 9.48E-292 |
| 22 CCL4     | 1      | 1           | 1.999882 | -4.15636 | OK     | 3.79E-152 | 26.2477909            | 0.026607 | 3.81E-152 |
| 23 CCN1     | 1      | 1           | 0.771892 | -2.91044 | OK     | 0         | 197.8381453           | 0.200674 | 0         |
| 24 CCND1    | 1      | 1           | 0.636074 | -1.77022 | OK     | 0         | 362.9119658           | 0.368142 | 0         |
| 25 CCND2    | 1      | 1           | 0.367254 | -2.54339 | OK     | 0         | 234.2296091           | 0.237594 | 0         |
| 26 CD55     | 1      | 1           | 2.356376 | -2.35135 | OK     | 0         | 370.4750918           | 0.375815 | 0         |
| 27 CD74     | 1      | 1           | -0.65505 | -2.78553 | OK     | 0         | 191.5775062           | 0.194331 | 0         |
| 28 CDKN1A   | 1      | 1           | 2.458907 | -2.55973 | OK     | 0         | 264.6479424           | 0.268459 | 0         |
| 29 CDKN2B   | 1      | 1           | 2.322522 | -2.24507 | OK     | 0         | 315.3491555           | 0.31989  | 0         |
| 30 CFB      | 1      | 1           | -0.67255 | -2.75234 | OK     | 0         | 142.8735756           | 0.144923 | 0         |
| 31 CH25H    | 1      | 1           | -0.30336 | -2.86365 | OK     | 0         | 243.1075023           | 0.246604 | 0         |
| 32 CLDN4    | 1      | 1           | 2.610722 | -2.50706 | OK     | 0         | 486.9148983           | 0.493936 | 0         |
| 33 CLEC2B   | 1      | 1           | 1.817906 | -4.08178 | OK     | 0         | 134.2228228           | 0.136149 | 0         |
| 34 CLU      | 1      | 1           | -0.6151  | -2.91825 | OK     | 0         | 115.1698537           | 0.116815 | 0         |
| 35 COL17A1  | 1      | 1           | 0.254002 | -2.50034 | OK     | 0         | 547.7495959           | 0.555644 | 0         |
| 36 CRABP2   | 1      | 1           | 1.8071   | -1.92574 | OK     | 0         | 365.6871792           | 0.370953 | 0         |
| 37 CRIP1    | 1      | 1           | 1.011198 | -1.6993  | OK     | 0         | 152.03995             | 0.154224 | 0         |
| 38 CRIP2    | 1      | 1           | 1.081226 | -1.48333 | OK     | 0         | 139.583941            | 0.141587 | 0         |
| 39 CTNNA1   | 1      | 1           | 0.117453 | -3.21299 | OK     | 0         | 523.8488433           | 0.531391 | 0         |
| 40 CTSG     | 1      | 1           | 1.930303 | -4.23015 | OK     | 0         | 69.62924232           | 0.070602 | 0         |
| 41 CXCL14   | 1      | 1           | 1.252692 | -1.56485 | OK     | 0         | 277.1710439           | 0.281144 | 0         |
| 42 CXCL2    | 1      | 1           | 1.307683 | -1.7498  | OK     | 2.79E-184 | 28.92629484           | 0.029325 | 2.81E-184 |
| 43 CYP2E1   | 1      | 1           | -0.54738 | -2.79112 | OK     | 0         | 67.68390842           | 0.068648 | 0         |
| 44 CYP3A5   | 1      | 1           | 1.863549 | -2.0873  | OK     | 0         | 103.0310223           | 0.104505 | 0         |
| 45 DLK2     | 1      | 1           | 0.40801  | -3.39077 | OK     | 0         | 412.9989488           | 0.418935 | 0         |
| 46 DST      | 1      | 1           | 0.461138 | -2.53634 | OK     | 0         | 568.3045922           | 0.5765   | 0         |
| 47 DUSP2    | 1      | 1           | 1.954673 | -2.62599 | OK     | 0         | 51.81895849           | 0.052553 | 0         |
| 48 EDN1     | 1      | 1           | 0.873766 | -3.03193 | OK     | 0         | 127.9897084           | 0.129815 | 0         |
| 49 EFNB2    | 1      | 1           | 2.486477 | -2.50172 | OK     | 0         | 128.9859157           | 0.130835 | 0         |
| 50 EGR3     | 1      | 1           | 1.452323 | -2.57406 | OK     | 0         | 84.38707069           | 0.085588 | 0         |
| 51 EIF1AY   | 1      | 1           | -0.08711 | -2.36609 | OK     | 0         | 70.75675467           | 0.071765 | 0         |
| 52 EMP3     | 1      | 1           | -0.20937 | -3.07937 | OK     | 0         | 256.9533955           | 0.260639 | 0         |
| 53 EPHA2    | 1      | 1           | 2.656547 | -2.42386 | OK     | 0         | 246.0033154           | 0.249544 | 0         |
| 54 FABP5    | 1      | 1           | 0.751235 | -2.02107 | OK     | 0         | 502.6097048           | 0.509848 | 0         |
| 55 FKBP2    | 1      | 1           | 0.476846 | -3.51657 | OK     | 0         | 53.25941835           | 0.054015 | 0         |
| 56 FLNA     | 1      | 1           | -0.13304 | -2.09958 | OK     | 0         | 231.8223223           | 0.235158 | 0         |
| 57 FST      | 1      | 1           | 0.414913 | -3.38829 | OK     | 0         | 125.6322119           | 0.12742  | 0         |
| 58 FXYD5    | 1      | 1           | 0.292254 | -3.39987 | OK     | 0         | 96.55240375           | 0.097933 | 0         |



|     |          |   |   |          |          |    |           |             |          |           |
|-----|----------|---|---|----------|----------|----|-----------|-------------|----------|-----------|
| 59  | GOS2     | 1 | 1 | -0.15712 | -2.87777 | OK | 0         | 140.1699029 | 0.142156 | 0         |
| 60  | GADD45A  | 1 | 1 | 1.241321 | -2.99126 | OK | 0         | 196.1514741 | 0.198973 | 0         |
| 61  | GADD45B  | 1 | 1 | 2.258333 | -1.48187 | OK | 0         | 105.6110451 | 0.107124 | 0         |
| 62  | GBP1     | 1 | 1 | 1.115467 | -2.94459 | OK | 0         | 142.4951207 | 0.144539 | 0         |
| 63  | GBP4     | 1 | 1 | -0.71441 | -2.42714 | OK | 0         | 95.03652978 | 0.096395 | 0         |
| 64  | GCLC     | 1 | 1 | 0.342775 | -2.37627 | OK | 0         | 203.325739  | 0.206249 | 0         |
| 65  | GEM      | 1 | 1 | 1.291327 | -1.65124 | OK | 0         | 116.9290194 | 0.118554 | 0         |
| 66  | GLDC     | 1 | 1 | -0.27651 | -2.63336 | OK | 0         | 157.210424  | 0.159465 | 0         |
| 67  | GLUL     | 1 | 1 | 0.434214 | -2.75789 | OK | 0         | 159.2299888 | 0.161518 | 0         |
| 68  | HBA2     | 1 | 1 | 2.493382 | -4.0692  | OK | 0.000385  | 3.363480976 | 0.003394 | 0.000385  |
| 69  | HBB      | 1 | 1 | 2.377574 | -3.73461 | OK | 5.27E-50  | 14.82207236 | 0.015012 | 5.30E-50  |
| 70  | HBEGF    | 1 | 1 | 2.164289 | -2.67934 | OK | 0         | 153.9177792 | 0.156129 | 0         |
| 71  | HES1     | 1 | 1 | 1.357425 | -2.38272 | OK | 0         | 201.3878748 | 0.204284 | 0         |
| 72  | HLA-DRA  | 1 | 1 | -0.56867 | -2.83555 | OK | 9.69E-265 | 34.7403494  | 0.035227 | 9.80E-265 |
| 73  | ID1      | 1 | 1 | 2.581724 | -2.61791 | OK | 0         | 242.6811155 | 0.246175 | 0         |
| 74  | ID3      | 1 | 1 | 2.521021 | -2.49203 | OK | 0         | 241.5798604 | 0.245057 | 0         |
| 75  | ID4      | 1 | 1 | 1.217844 | -1.42026 | OK | 0         | 202.8877829 | 0.205806 | 0         |
| 76  | IFI27    | 1 | 1 | -0.67546 | -2.20074 | OK | 0         | 181.7270298 | 0.18434  | 0         |
| 77  | IFIT3    | 1 | 1 | -0.7039  | -2.72902 | OK | 0         | 74.26490012 | 0.075323 | 0         |
| 78  | IFITM1   | 1 | 1 | -0.57002 | -2.75697 | OK | 0         | 187.9036526 | 0.190596 | 0         |
| 79  | IFITM2   | 1 | 1 | 1.011108 | -1.78286 | OK | 0         | 74.91433667 | 0.075982 | 0         |
| 80  | IGFBP3   | 1 | 1 | 0.371005 | -2.70024 | OK | 0         | 306.9375209 | 0.31135  | 0         |
| 81  | IGFBP5   | 1 | 1 | 0.588682 | -2.71975 | OK | 0         | 160.1798855 | 0.162479 | 0         |
| 82  | IGFBP6   | 1 | 1 | 0.787968 | -2.10519 | OK | 0         | 262.7523086 | 0.266529 | 0         |
| 83  | IGFBP7   | 1 | 1 | -0.34624 | -2.96818 | OK | 0         | 352.2977457 | 0.357359 | 0         |
| 84  | IGHA1    | 1 | 1 | 2.557645 | -4.25112 | OK | 1.41E-126 | 23.90349071 | 0.024215 | 1.42E-126 |
| 85  | IGKC     | 1 | 1 | 2.54377  | -4.25131 | OK | 2.44E-46  | 14.24399628 | 0.01443  | 2.45E-46  |
| 86  | IGLC1    | 1 | 1 | 2.556192 | -4.24673 | OK | 2.08E-45  | 14.09346196 | 0.014242 | 2.09E-45  |
| 87  | IGLC2    | 1 | 1 | 2.554935 | -4.25502 | OK | 5.26E-49  | 14.66684552 | 0.014848 | 5.28E-49  |
| 88  | IGLC3    | 1 | 1 | 2.555681 | -4.23277 | OK | 1.59E-16  | 8.165986867 | 0.008247 | 1.60E-16  |
| 89  | IL18     | 1 | 1 | 0.52498  | -3.26359 | OK | 0         | 296.1337585 | 0.300399 | 0         |
| 90  | IL1R2    | 1 | 1 | -0.23434 | -3.11895 | OK | 0         | 545.0326173 | 0.55288  | 0         |
| 91  | IRF1     | 1 | 1 | -0.60471 | -2.69317 | OK | 0         | 170.8912911 | 0.173347 | 0         |
| 92  | ISG15    | 1 | 1 | -0.66291 | -2.14224 | OK | 0         | 53.05617638 | 0.053809 | 0         |
| 93  | ITGA6    | 1 | 1 | 0.254387 | -2.40469 | OK | 0         | 303.19091   | 0.307557 | 0         |
| 94  | ITM2A    | 1 | 1 | 1.483514 | -1.33433 | OK | 5.07E-44  | 13.86630512 | 0.01405  | 5.08E-44  |
| 95  | ITPKC    | 1 | 1 | 2.68213  | -2.47037 | OK | 0         | 229.6816513 | 0.232987 | 0         |
| 96  | JCHAIN   | 1 | 1 | 2.560954 | -4.2492  | OK | 3.61E-250 | 33.76159979 | 0.03417  | 3.65E-250 |
| 97  | KCNQ1OT1 | 1 | 1 | 1.962834 | -2.23346 | OK | 0         | 90.04412084 | 0.091329 | 0         |
| 98  | KLF2     | 1 | 1 | 2.378366 | -1.98028 | OK | 0         | 126.2714861 | 0.128081 | 0         |
| 99  | KLF6     | 1 | 1 | 1.352223 | -2.84309 | OK | 0         | 265.1055937 | 0.268921 | 0         |
| 100 | KLK5     | 1 | 1 | 0.547774 | -3.33708 | OK | 0         | 118.4480083 | 0.120138 | 0         |
| 101 | KRT14    | 1 | 1 | 1.203802 | -1.9339  | OK | 0         | 517.0799878 | 0.524537 | 0         |
| 102 | KRT17    | 1 | 1 | 0.385406 | -2.94431 | OK | 0         | 232.3568361 | 0.235701 | 0         |
| 103 | KRT31    | 1 | 1 | 0.948314 | -1.83795 | OK | 0         | 56.15630649 | 0.056952 | 0         |
| 104 | KRT8     | 1 | 1 | 1.223441 | -1.86004 | OK | 0         | 223.0145213 | 0.226224 | 0         |
| 105 | LAMB3    | 1 | 1 | 0.040066 | -2.46938 | OK | 0         | 415.3611254 | 0.421347 | 0         |
| 106 | LDLR     | 1 | 1 | 2.208782 | -2.64574 | OK | 0         | 155.3873989 | 0.157619 | 0         |
| 107 | LGALS1   | 1 | 1 | 1.380708 | -1.75596 | OK | 2.14E-224 | 31.95732083 | 0.032402 | 2.16E-224 |
| 108 | LGALS7   | 1 | 1 | 1.090735 | -2.06942 | OK | 0         | 126.3137809 | 0.128127 | 0         |
| 109 | LGALSL   | 1 | 1 | 2.31963  | -2.18426 | OK | 0         | 335.035367  | 0.339862 | 0         |
| 110 | LOXL4    | 1 | 1 | -0.19665 | -2.7509  | OK | 0         | 248.8545188 | 0.252411 | 0         |
| 111 | LSP1     | 1 | 1 | 1.118721 | -1.63978 | OK | 8.94E-25  | 10.21000348 | 0.010341 | 8.96E-25  |
| 112 | LTF      | 1 | 1 | -0.5884  | -2.76523 | OK | 0         | 87.20869164 | 0.088434 | 0         |
| 113 | MAFF     | 1 | 1 | 2.511036 | -2.52687 | OK | 0         | 211.3821363 | 0.214423 | 0         |
| 114 | MALAT1   | 1 | 1 | 1.5667   | -2.22478 | OK | 0         | 274.782913  | 0.278733 | 0         |
| 115 | MAP3K8   | 1 | 1 | 2.390412 | -2.41375 | OK | 0         | 135.6530637 | 0.137599 | 0         |
| 116 | MIDN     | 1 | 1 | 2.452559 | -2.54166 | OK | 0         | 233.2363591 | 0.236593 | 0         |
| 117 | MT-ND4L  | 1 | 1 | 1.018874 | -2.33358 | OK | 0         | 173.4250491 | 0.175918 | 0         |
| 118 | MTRNR2L8 | 1 | 1 | 0.833867 | -2.22614 | OK | 0         | 48.66179031 | 0.049352 | 0         |

|               |   |   |          |          |    |           |             |          |           |
|---------------|---|---|----------|----------|----|-----------|-------------|----------|-----------|
| 119 MYADM     | 1 | 1 | 1.113583 | -2.80532 | OK | 0         | 144.0347554 | 0.146098 | 0         |
| 120 MYO1B     | 1 | 1 | 0.028748 | -2.44418 | OK | 0         | 138.4852347 | 0.14047  | 0         |
| 121 NCOA7     | 1 | 1 | 1.155427 | -2.83456 | OK | 0         | 337.5638755 | 0.342428 | 0         |
| 122 NEAT1     | 1 | 1 | 1.836944 | -2.38097 | OK | 0         | 267.4669646 | 0.271314 | 0         |
| 123 NEDD9     | 1 | 1 | 0.333455 | -2.76122 | OK | 0         | 193.8402198 | 0.196605 | 0         |
| 124 NIBAN1    | 1 | 1 | -0.13468 | -2.07621 | OK | 0         | 123.085989  | 0.12485  | 0         |
| 125 NPPC      | 1 | 1 | 1.228183 | -1.53848 | OK | 0         | 114.497038  | 0.116054 | 0         |
| 126 NR4A1     | 1 | 1 | 1.543684 | -2.59048 | OK | 0         | 169.8232228 | 0.172264 | 0         |
| 127 NR4A2     | 1 | 1 | 1.544583 | -2.54334 | OK | 4.35E-307 | 37.44012295 | 0.037967 | 4.41E-307 |
| 128 NRARP     | 1 | 1 | 2.601736 | -2.46734 | OK | 0         | 394.009364  | 0.399689 | 0         |
| 129 NSUN6     | 1 | 1 | 1.329912 | -2.37738 | OK | 0         | 49.45029147 | 0.05015  | 0         |
| 130 OVOL1     | 1 | 1 | 2.476076 | -2.59022 | OK | 0         | 188.088242  | 0.190793 | 0         |
| 131 PDPN      | 1 | 1 | -0.19634 | -2.9963  | OK | 0         | 311.1397947 | 0.315608 | 0         |
| 132 PEG3      | 1 | 1 | 0.799547 | -2.36057 | OK | 9.24E-221 | 31.69454113 | 0.032131 | 9.32E-221 |
| 133 PER3      | 1 | 1 | 0.675756 | -1.9635  | OK | 0         | 132.3432152 | 0.134242 | 0         |
| 134 PHGDH     | 1 | 1 | 0.522621 | -3.54771 | OK | 0         | 233.1862418 | 0.236539 | 0         |
| 135 PHLDA2    | 1 | 1 | 2.583079 | -2.49378 | OK | 0         | 345.8296751 | 0.350813 | 0         |
| 136 PLAUR     | 1 | 1 | 2.397017 | -2.61751 | OK | 0         | 90.32190452 | 0.091612 | 0         |
| 137 PLK2      | 1 | 1 | 1.187502 | -2.94141 | OK | 0         | 172.1827367 | 0.174658 | 0         |
| 138 PLK3      | 1 | 1 | 1.848076 | -2.37551 | OK | 0         | 89.0196517  | 0.090292 | 0         |
| 139 POSTN     | 1 | 1 | -0.36877 | -2.50106 | OK | 0         | 232.6168156 | 0.235962 | 0         |
| 140 PRRX1     | 1 | 1 | -0.34054 | -2.66218 | OK | 0         | 223.6743965 | 0.226881 | 0         |
| 141 PRSS23    | 1 | 1 | -0.11074 | -2.75069 | OK | 0         | 184.9629801 | 0.187603 | 0         |
| 142 RAB11FIP1 | 1 | 1 | 2.403471 | -2.33391 | OK | 0         | 462.1266184 | 0.468791 | 0         |
| 143 RAB31     | 1 | 1 | -0.02532 | -2.50432 | OK | 0         | 94.22632269 | 0.095572 | 0         |
| 144 RAMP1     | 1 | 1 | 0.188345 | -3.31549 | OK | 0         | 317.2659924 | 0.32182  | 0         |
| 145 RHOB      | 1 | 1 | 2.242625 | -1.4497  | OK | 0         | 202.4356987 | 0.205347 | 0         |
| 146 RPS4Y1    | 1 | 1 | -0.05598 | -2.47687 | OK | 0         | 186.392789  | 0.189073 | 0         |
| 147 RRAD      | 1 | 1 | 2.504522 | -2.52419 | OK | 0         | 279.0862894 | 0.283105 | 0         |
| 148 S100A9    | 1 | 1 | -0.45281 | -2.63434 | OK | 0         | 389.1506354 | 0.394746 | 0         |
| 149 SAA1      | 1 | 1 | -0.54209 | -2.95333 | OK | 0         | 186.5676271 | 0.189238 | 0         |
| 150 SERPINB2  | 1 | 1 | 2.394515 | -2.29081 | OK | 0         | 359.4517273 | 0.364632 | 0         |
| 151 SLC1A3    | 1 | 1 | 0.518801 | -2.61277 | OK | 0         | 347.6272537 | 0.352625 | 0         |
| 152 SLC25A25  | 1 | 1 | 2.357609 | -2.66504 | OK | 0         | 123.5270162 | 0.125297 | 0         |
| 153 SLC7A2    | 1 | 1 | 0.472764 | -2.38052 | OK | 0         | 111.0431031 | 0.112627 | 0         |
| 154 SLC7A5    | 1 | 1 | 0.554562 | -2.59132 | OK | 0         | 357.6538348 | 0.3628   | 0         |
| 155 SNHG17    | 1 | 1 | 0.759469 | -2.21123 | OK | 0         | 74.24134721 | 0.0753   | 0         |
| 156 SOCS3     | 1 | 1 | -0.33121 | -2.88357 | OK | 0         | 140.3157356 | 0.142329 | 0         |
| 157 SOD2      | 1 | 1 | -0.59301 | -2.74724 | OK | 0         | 188.8917606 | 0.191608 | 0         |
| 158 SOX4      | 1 | 1 | 0.829218 | -2.55251 | OK | 0         | 98.85032033 | 0.100266 | 0         |
| 159 SOX9      | 1 | 1 | 2.555352 | -2.57899 | OK | 0         | 98.2141115  | 0.099619 | 0         |
| 160 SRGN      | 1 | 1 | 1.931935 | -4.22501 | OK | 0         | 48.95780565 | 0.049641 | 0         |
| 161 SYNPO2    | 1 | 1 | -0.11312 | -2.64356 | OK | 0         | 250.203614  | 0.253788 | 0         |
| 162 SYT8      | 1 | 1 | 1.02998  | -1.7182  | OK | 0         | 81.57041209 | 0.082734 | 0         |
| 163 TIMP1     | 1 | 1 | -0.36575 | -2.62806 | OK | 0         | 347.6863231 | 0.352696 | 0         |
| 164 TINAGL1   | 1 | 1 | -0.21167 | -2.83272 | OK | 0         | 168.6046847 | 0.171013 | 0         |
| 165 TNC       | 1 | 1 | -0.15141 | -2.7058  | OK | 0         | 284.1738482 | 0.288246 | 0         |
| 166 TNFAIP2   | 1 | 1 | -0.65859 | -2.53392 | OK | 0         | 197.2090193 | 0.200043 | 0         |
| 167 TNFAIP3   | 1 | 1 | 1.433982 | -2.69384 | OK | 0         | 50.76613644 | 0.051486 | 0         |
| 168 TNFRSF12A | 1 | 1 | 0.076905 | -2.818   | OK | 0         | 126.3962489 | 0.128204 | 0         |
| 169 TPM2      | 1 | 1 | 0.403067 | -3.44387 | OK | 0         | 192.4588265 | 0.195213 | 0         |
| 170 TPPP3     | 1 | 1 | 1.007442 | -1.70061 | OK | 0         | 89.45077119 | 0.090727 | 0         |
| 171 TPSAB1    | 1 | 1 | 1.956884 | -4.24606 | OK | 0         | 105.468717  | 0.106962 | 0         |
| 172 TPSB2     | 1 | 1 | 1.921124 | -4.24201 | OK | 0         | 113.88851   | 0.115504 | 0         |
| 173 TRIB1     | 1 | 1 | 1.4767   | -2.83827 | OK | 0         | 77.35067692 | 0.078455 | 0         |
| 174 TSLP      | 1 | 1 | 0.266599 | -3.33594 | OK | 0         | 368.0925964 | 0.37339  | 0         |
| 175 TUBB2A    | 1 | 1 | 2.517156 | -2.00854 | OK | 0         | 217.7546552 | 0.220887 | 0         |
| 176 TXNIP     | 1 | 1 | 0.08213  | -2.86649 | OK | 0         | 247.3527351 | 0.250913 | 0         |
| 177 UGCG      | 1 | 1 | -0.69959 | -2.45222 | OK | 0         | 134.2644889 | 0.136191 | 0         |
| 178 VIM       | 1 | 1 | 1.89763  | -4.18436 | OK | 8.36E-207 | 30.66491519 | 0.031091 | 8.43E-207 |

|     |           |   |   |          |          |    |   |             |          |   |
|-----|-----------|---|---|----------|----------|----|---|-------------|----------|---|
| 179 | WNT10A    | 1 | 1 | 0.457502 | -3.26788 | OK | 0 | 389.7178211 | 0.395321 | 0 |
| 180 | XIST      | 1 | 1 | 1.056281 | -2.09943 | OK | 0 | 71.0457907  | 0.072059 | 0 |
| 181 | ZNF750    | 1 | 1 | 2.368178 | -2.42324 | OK | 0 | 440.6977967 | 0.447052 | 0 |
| 182 | ASF1B     | 2 | 2 | -4.33988 | -6.22398 | OK | 0 | 303.6197256 | 0.30797  | 0 |
| 183 | ATAD2     | 2 | 2 | -4.25714 | -5.88279 | OK | 0 | 332.4975271 | 0.337284 | 0 |
| 184 | ATAD5     | 2 | 2 | -4.15981 | -5.81475 | OK | 0 | 294.7481882 | 0.298979 | 0 |
| 185 | BRCA1     | 2 | 2 | -4.02936 | -5.89745 | OK | 0 | 324.5089025 | 0.329168 | 0 |
| 186 | BRCA2     | 2 | 2 | -4.24062 | -5.72768 | OK | 0 | 307.555001  | 0.311969 | 0 |
| 187 | CARHSP1   | 2 | 2 | -4.48334 | -6.19392 | OK | 0 | 270.5745973 | 0.274471 | 0 |
| 188 | CCDC34    | 2 | 2 | -5.14806 | -6.52291 | OK | 0 | 265.4406665 | 0.269262 | 0 |
| 189 | CDCA5     | 2 | 2 | -4.89061 | -5.89367 | OK | 0 | 322.045084  | 0.326657 | 0 |
| 190 | CDCA7     | 2 | 2 | -3.51188 | -6.09523 | OK | 0 | 291.3183535 | 0.295502 | 0 |
| 191 | CDT1      | 2 | 2 | -3.49152 | -6.16998 | OK | 0 | 302.2505479 | 0.306593 | 0 |
| 192 | CENPK     | 2 | 2 | -4.80545 | -6.44827 | OK | 0 | 367.7205942 | 0.373007 | 0 |
| 193 | CENPM     | 2 | 2 | -4.80206 | -6.44878 | OK | 0 | 383.4095938 | 0.388922 | 0 |
| 194 | CENPU     | 2 | 2 | -4.12404 | -6.17607 | OK | 0 | 248.5664698 | 0.252142 | 0 |
| 195 | CEP78     | 2 | 2 | -4.31891 | -5.68348 | OK | 0 | 183.1694548 | 0.185795 | 0 |
| 196 | CHEK1     | 2 | 2 | -3.69022 | -6.05    | OK | 0 | 290.5412327 | 0.294715 | 0 |
| 197 | CLSPN     | 2 | 2 | -4.09267 | -6.09342 | OK | 0 | 389.6023096 | 0.395193 | 0 |
| 198 | DEK       | 2 | 2 | -3.67038 | -6.02709 | OK | 0 | 361.7305588 | 0.366943 | 0 |
| 199 | DHFR      | 2 | 2 | -4.31338 | -6.14952 | OK | 0 | 336.6264085 | 0.341468 | 0 |
| 200 | DNMT1     | 2 | 2 | -3.74354 | -5.96857 | OK | 0 | 320.6282158 | 0.325245 | 0 |
| 201 | DUT       | 2 | 2 | -3.7669  | -6.1359  | OK | 0 | 312.5193279 | 0.317021 | 0 |
| 202 | E2F8      | 2 | 2 | -4.82741 | -5.79589 | OK | 0 | 224.0968609 | 0.227316 | 0 |
| 203 | ESCO2     | 2 | 2 | -4.90131 | -5.85412 | OK | 0 | 417.5632557 | 0.42355  | 0 |
| 204 | EZH2      | 2 | 2 | -4.68819 | -5.78957 | OK | 0 | 212.581927  | 0.215637 | 0 |
| 205 | FAM111B   | 2 | 2 | -4.00952 | -6.04591 | OK | 0 | 420.2372258 | 0.426279 | 0 |
| 206 | FANCI     | 2 | 2 | -4.56759 | -5.80454 | OK | 0 | 306.0426272 | 0.310437 | 0 |
| 207 | FBXO5     | 2 | 2 | -4.94313 | -5.8549  | OK | 0 | 294.1621827 | 0.298379 | 0 |
| 208 | FEN1      | 2 | 2 | -3.99097 | -6.19048 | OK | 0 | 301.9577638 | 0.306297 | 0 |
| 209 | GINS2     | 2 | 2 | -3.50142 | -6.13664 | OK | 0 | 349.9647539 | 0.354994 | 0 |
| 210 | GMNN      | 2 | 2 | -3.65876 | -6.06001 | OK | 0 | 260.1691145 | 0.263911 | 0 |
| 211 | HELLS     | 2 | 2 | -3.72866 | -6.02014 | OK | 0 | 414.2059156 | 0.420169 | 0 |
| 212 | HES4      | 2 | 2 | -4.15843 | -6.23743 | OK | 0 | 260.8087447 | 0.264563 | 0 |
| 213 | HIST1H1A  | 2 | 2 | 0.114293 | -8.62427 | OK | 0 | 371.44293   | 0.376778 | 0 |
| 214 | HIST1H1B  | 2 | 2 | 0.127777 | -8.60943 | OK | 0 | 447.9944124 | 0.454436 | 0 |
| 215 | HIST1H1C  | 2 | 2 | 0.106376 | -8.63327 | OK | 0 | 179.4587549 | 0.182038 | 0 |
| 216 | HIST1H1D  | 2 | 2 | 0.135122 | -8.66808 | OK | 0 | 341.452203  | 0.346366 | 0 |
| 217 | HIST1H1E  | 2 | 2 | 0.110582 | -8.62709 | OK | 0 | 229.9497091 | 0.233257 | 0 |
| 218 | HIST1H2AC | 2 | 2 | 0.18788  | -8.51691 | OK | 0 | 177.2708799 | 0.179818 | 0 |
| 219 | HIST1H2AC | 2 | 2 | 0.108157 | -8.63215 | OK | 0 | 308.5419311 | 0.312968 | 0 |
| 220 | HIST1H2BC | 2 | 2 | 0.111142 | -8.62646 | OK | 0 | 183.31419   | 0.185941 | 0 |
| 221 | HIST1H3B  | 2 | 2 | 0.123162 | -8.60103 | OK | 0 | 388.4850417 | 0.394043 | 0 |
| 222 | HIST1H3D  | 2 | 2 | 0.096466 | -8.64129 | OK | 0 | 281.4909056 | 0.285528 | 0 |
| 223 | HIST1H3G  | 2 | 2 | 0.083851 | -8.65213 | OK | 0 | 343.3052112 | 0.348208 | 0 |
| 224 | HIST1H4C  | 2 | 2 | 0.077953 | -8.66427 | OK | 0 | 330.5816847 | 0.335344 | 0 |
| 225 | HIST2H2AC | 2 | 2 | 0.103011 | -8.65129 | OK | 0 | 184.0538168 | 0.186697 | 0 |
| 226 | HSPH1     | 2 | 2 | -3.67822 | -5.32866 | OK | 0 | 186.3407804 | 0.18902  | 0 |
| 227 | LIG1      | 2 | 2 | -4.11585 | -6.01801 | OK | 0 | 237.5323514 | 0.240942 | 0 |
| 228 | LMNB1     | 2 | 2 | -4.49294 | -5.56294 | OK | 0 | 393.3574489 | 0.399018 | 0 |
| 229 | MCM3      | 2 | 2 | -3.46501 | -6.07193 | OK | 0 | 309.7711593 | 0.31423  | 0 |
| 230 | MCM4      | 2 | 2 | -3.66856 | -5.67707 | OK | 0 | 240.3590917 | 0.243817 | 0 |
| 231 | MCM5      | 2 | 2 | -3.44434 | -6.18908 | OK | 0 | 287.4815364 | 0.291616 | 0 |
| 232 | MCM6      | 2 | 2 | -3.47477 | -6.0325  | OK | 0 | 280.9989135 | 0.285035 | 0 |
| 233 | MCM7      | 2 | 2 | -3.52583 | -6.16576 | OK | 0 | 354.8152696 | 0.359923 | 0 |
| 234 | MELK      | 2 | 2 | -5.14283 | -5.78189 | OK | 0 | 259.7973015 | 0.263523 | 0 |
| 235 | MND1      | 2 | 2 | -4.77889 | -6.44416 | OK | 0 | 321.7540889 | 0.326367 | 0 |
| 236 | MNS1      | 2 | 2 | -4.75841 | -6.36889 | OK | 0 | 303.8454906 | 0.308196 | 0 |
| 237 | MSH6      | 2 | 2 | -3.55908 | -5.85192 | OK | 0 | 223.4767841 | 0.226689 | 0 |
| 238 | MYBL2     | 2 | 2 | -4.73078 | -6.08976 | OK | 0 | 330.5514179 | 0.335289 | 0 |

|     |          |   |   |          |          |    |   |             |          |   |
|-----|----------|---|---|----------|----------|----|---|-------------|----------|---|
| 239 | NASP     | 2 | 2 | -3.6002  | -6.05167 | OK | 0 | 322.7272722 | 0.327377 | 0 |
| 240 | NCAPD3   | 2 | 2 | -4.55137 | -5.6881  | OK | 0 | 246.7831849 | 0.250327 | 0 |
| 241 | NCAPG2   | 2 | 2 | -4.6771  | -5.68585 | OK | 0 | 256.4721136 | 0.260148 | 0 |
| 242 | ORC6     | 2 | 2 | -4.09723 | -6.13835 | OK | 0 | 363.8643327 | 0.369094 | 0 |
| 243 | PCLAF    | 2 | 2 | -4.9571  | -6.52778 | OK | 0 | 448.9176111 | 0.455385 | 0 |
| 244 | PCNA     | 2 | 2 | -3.6325  | -6.16611 | OK | 0 | 320.7812437 | 0.325402 | 0 |
| 245 | PKMYT1   | 2 | 2 | -4.58171 | -6.20377 | OK | 0 | 315.0700891 | 0.319584 | 0 |
| 246 | PIIF     | 2 | 2 | -3.48611 | -6.15633 | OK | 0 | 120.3496948 | 0.122075 | 0 |
| 247 | PSIP1    | 2 | 2 | -3.75722 | -6.01724 | OK | 0 | 316.7354083 | 0.321295 | 0 |
| 248 | RAD51AP1 | 2 | 2 | -4.81258 | -6.3274  | OK | 0 | 345.7551801 | 0.350715 | 0 |
| 249 | RECQL    | 2 | 2 | -3.74187 | -5.67753 | OK | 0 | 128.7470146 | 0.130593 | 0 |
| 250 | RFC3     | 2 | 2 | -3.86256 | -5.99625 | OK | 0 | 202.5201102 | 0.205419 | 0 |
| 251 | RIF1     | 2 | 2 | -3.734   | -5.47939 | OK | 0 | 203.6023775 | 0.20653  | 0 |
| 252 | RRM1     | 2 | 2 | -4.05986 | -5.81768 | OK | 0 | 281.6875114 | 0.285743 | 0 |
| 253 | RRM2     | 2 | 2 | -4.81254 | -6.01153 | OK | 0 | 477.6199408 | 0.484495 | 0 |
| 254 | SLC20A1  | 2 | 2 | -4.17883 | -5.66903 | OK | 0 | 113.0806074 | 0.114698 | 0 |
| 255 | SMC1A    | 2 | 2 | -3.78537 | -5.43971 | OK | 0 | 208.891864  | 0.211896 | 0 |
| 256 | SMC2     | 2 | 2 | -4.43242 | -5.7005  | OK | 0 | 351.0626718 | 0.356119 | 0 |
| 257 | TCOF1    | 2 | 2 | -3.8235  | -5.51156 | OK | 0 | 197.243147  | 0.200075 | 0 |
| 258 | TK1      | 2 | 2 | -4.88838 | -6.52042 | OK | 0 | 432.2123114 | 0.438438 | 0 |
| 259 | TMEM106  | 2 | 2 | -4.82531 | -6.50557 | OK | 0 | 220.6734587 | 0.223848 | 0 |
| 260 | TMPO     | 2 | 2 | -4.5418  | -5.50397 | OK | 0 | 294.0909353 | 0.298327 | 0 |
| 261 | TYMS     | 2 | 2 | -4.60287 | -6.35712 | OK | 0 | 466.8802178 | 0.473602 | 0 |
| 262 | UBE2T    | 2 | 2 | -5.24165 | -6.15643 | OK | 0 | 350.8187575 | 0.355866 | 0 |
| 263 | WDR76    | 2 | 2 | -3.75248 | -5.98112 | OK | 0 | 237.6101167 | 0.241015 | 0 |
| 264 | ZWINT    | 2 | 2 | -4.90346 | -6.48976 | OK | 0 | 347.7647229 | 0.352768 | 0 |
| 265 | ANLN     | 3 | 2 | -6.64805 | -5.71415 | OK | 0 | 475.0182829 | 0.48185  | 0 |
| 266 | ANP32E   | 3 | 2 | -6.73942 | -6.17275 | OK | 0 | 250.3710827 | 0.253974 | 0 |
| 267 | ARHGAP11 | 3 | 2 | -6.77772 | -5.83861 | OK | 0 | 324.5657833 | 0.329221 | 0 |
| 268 | ARL6IP1  | 3 | 2 | -6.58939 | -6.87519 | OK | 0 | 225.2103818 | 0.228451 | 0 |
| 269 | ASPM     | 3 | 2 | -7.02824 | -6.2946  | OK | 0 | 518.3509325 | 0.525808 | 0 |
| 270 | AURKA    | 3 | 2 | -7.2686  | -5.79176 | OK | 0 | 334.7481773 | 0.339552 | 0 |
| 271 | AURKB    | 3 | 2 | -6.9672  | -5.38816 | OK | 0 | 402.6692237 | 0.408447 | 0 |
| 272 | BIRC5    | 3 | 2 | -6.5156  | -6.71668 | OK | 0 | 477.3368896 | 0.484209 | 0 |
| 273 | BUB1     | 3 | 2 | -7.06104 | -6.22508 | OK | 0 | 380.6895813 | 0.386139 | 0 |
| 274 | BUB1B    | 3 | 2 | -6.43377 | -5.48833 | OK | 0 | 354.5448231 | 0.359622 | 0 |
| 275 | CCNA2    | 3 | 2 | -6.79807 | -5.64315 | OK | 0 | 488.430511  | 0.495453 | 0 |
| 276 | CCNB1    | 3 | 2 | -6.61241 | -6.83441 | OK | 0 | 419.4382514 | 0.425475 | 0 |
| 277 | CCNB2    | 3 | 2 | -6.59044 | -6.82483 | OK | 0 | 427.368051  | 0.433513 | 0 |
| 278 | CDC20    | 3 | 2 | -6.624   | -6.81963 | OK | 0 | 440.6831851 | 0.44702  | 0 |
| 279 | CDCA3    | 3 | 2 | -7.24016 | -5.74895 | OK | 0 | 379.5626451 | 0.385006 | 0 |
| 280 | CDCA8    | 3 | 2 | -7.0953  | -5.58952 | OK | 0 | 398.6056673 | 0.404323 | 0 |
| 281 | CDK1     | 3 | 2 | -6.30193 | -5.3877  | OK | 0 | 456.769362  | 0.463342 | 0 |
| 282 | CDKN3    | 3 | 2 | -6.5829  | -6.83828 | OK | 0 | 449.2620406 | 0.455724 | 0 |
| 283 | CENPA    | 3 | 2 | -7.28885 | -6.13209 | OK | 0 | 428.3067258 | 0.434442 | 0 |
| 284 | CENPE    | 3 | 2 | -7.09678 | -6.29993 | OK | 0 | 450.2198086 | 0.45669  | 0 |
| 285 | CENPF    | 3 | 2 | -6.81276 | -6.48649 | OK | 0 | 508.4613173 | 0.515784 | 0 |
| 286 | CENPN    | 3 | 2 | -6.08699 | -6.71067 | OK | 0 | 265.6445725 | 0.26946  | 0 |
| 287 | CENPW    | 3 | 2 | -6.13795 | -6.79454 | OK | 0 | 410.6286908 | 0.416546 | 0 |
| 288 | CEP55    | 3 | 2 | -6.93304 | -6.35802 | OK | 0 | 488.8382505 | 0.495863 | 0 |
| 289 | CKAP2    | 3 | 2 | -7.07195 | -5.88238 | OK | 0 | 273.5440429 | 0.27748  | 0 |
| 290 | CKAP2L   | 3 | 2 | -6.44093 | -5.34519 | OK | 0 | 394.9006833 | 0.400563 | 0 |
| 291 | CKAP5    | 3 | 2 | -6.92619 | -6.09364 | OK | 0 | 173.8331852 | 0.176327 | 0 |
| 292 | CKS1B    | 3 | 2 | -5.84114 | -6.27704 | OK | 0 | 315.6493946 | 0.320196 | 0 |
| 293 | CKS2     | 3 | 2 | -7.37503 | -6.04584 | OK | 0 | 265.0567637 | 0.268873 | 0 |
| 294 | DBF4     | 3 | 2 | -6.54748 | -5.65834 | OK | 0 | 220.4418124 | 0.223609 | 0 |
| 295 | DDX39A   | 3 | 2 | -6.25706 | -6.82053 | OK | 0 | 233.5166373 | 0.236876 | 0 |
| 296 | DEPDC1   | 3 | 2 | -7.02457 | -5.82092 | OK | 0 | 429.0195123 | 0.435177 | 0 |
| 297 | DIAPH3   | 3 | 2 | -6.10346 | -5.51381 | OK | 0 | 383.3640675 | 0.388865 | 0 |
| 298 | DLGAP5   | 3 | 2 | -7.1365  | -6.33492 | OK | 0 | 509.9364777 | 0.517261 | 0 |

|     |           |   |   |          |          |    |           |             |          |           |
|-----|-----------|---|---|----------|----------|----|-----------|-------------|----------|-----------|
| 299 | DTYMK     | 3 | 2 | -6.04055 | -6.67561 | OK | 0         | 288.3997887 | 0.292552 | 0         |
| 300 | ECT2      | 3 | 2 | -6.86809 | -6.16992 | OK | 0         | 296.345316  | 0.300606 | 0         |
| 301 | FAM83D    | 3 | 2 | -7.37405 | -5.93832 | OK | 0         | 178.0695124 | 0.180627 | 0         |
| 302 | FOXMI     | 3 | 2 | -6.52067 | -5.68305 | OK | 0         | 270.2818502 | 0.274154 | 0         |
| 303 | GTSE1     | 3 | 2 | -7.22138 | -5.75804 | OK | 0         | 459.0597043 | 0.465644 | 0         |
| 304 | H2AFX     | 3 | 2 | -6.28617 | -5.26615 | OK | 0         | 263.2412019 | 0.267029 | 0         |
| 305 | H2AFZ     | 3 | 2 | -6.00822 | -6.78725 | OK | 0         | 338.9789411 | 0.343862 | 0         |
| 306 | HJURP     | 3 | 2 | -6.46623 | -5.38949 | OK | 0         | 334.6720879 | 0.339459 | 0         |
| 307 | HMGB2     | 3 | 2 | -5.92647 | -5.90951 | OK | 0         | 345.8882459 | 0.350872 | 0         |
| 308 | HMGB3     | 3 | 2 | -6.37366 | -6.78776 | OK | 0         | 237.7025782 | 0.241122 | 0         |
| 309 | HMMR      | 3 | 2 | -7.17153 | -6.26332 | OK | 0         | 498.1264527 | 0.505283 | 0         |
| 310 | KIF11     | 3 | 2 | -6.35152 | -5.55997 | OK | 0         | 381.813916  | 0.387305 | 0         |
| 311 | KIF20B    | 3 | 2 | -6.94495 | -6.16014 | OK | 0         | 377.0758759 | 0.382502 | 0         |
| 312 | KIF23     | 3 | 2 | -7.13769 | -5.70371 | OK | 0         | 443.0448743 | 0.4494   | 0         |
| 313 | KIF2C     | 3 | 2 | -6.99928 | -5.81684 | OK | 0         | 400.3925918 | 0.40613  | 0         |
| 314 | KIFC1     | 3 | 2 | -6.39928 | -5.35402 | OK | 0         | 356.6972792 | 0.361812 | 0         |
| 315 | KNL1      | 3 | 2 | -6.75852 | -5.88556 | OK | 0         | 424.8288366 | 0.430926 | 0         |
| 316 | KNSTRN    | 3 | 2 | -7.3572  | -6.13795 | OK | 0         | 257.8392919 | 0.261534 | 0         |
| 317 | KPNA2     | 3 | 2 | -7.38063 | -6.06982 | OK | 0         | 318.2757918 | 0.322856 | 0         |
| 318 | LMNB2     | 3 | 2 | -6.62174 | -5.8299  | OK | 0         | 244.4724342 | 0.247986 | 0         |
| 319 | MAD2L1    | 3 | 2 | -5.76078 | -6.2891  | OK | 0         | 414.4505642 | 0.420416 | 0         |
| 320 | MKI67     | 3 | 2 | -6.5938  | -5.80462 | OK | 0         | 526.9579538 | 0.534549 | 0         |
| 321 | MXD3      | 3 | 2 | -7.07385 | -5.51901 | OK | 0         | 290.628833  | 0.294789 | 0         |
| 322 | NCAPD2    | 3 | 2 | -6.68758 | -6.02272 | OK | 0         | 245.3189966 | 0.248842 | 0         |
| 323 | NCAPG     | 3 | 2 | -6.3907  | -5.46391 | OK | 0         | 408.6318355 | 0.414496 | 0         |
| 324 | NDC80     | 3 | 2 | -6.37732 | -5.32053 | OK | 0         | 404.7600497 | 0.410566 | 0         |
| 325 | NUF2      | 3 | 2 | -6.94983 | -5.76908 | OK | 0         | 462.6247398 | 0.469268 | 0         |
| 326 | NUSAP1    | 3 | 2 | -6.49613 | -5.38855 | OK | 0         | 516.8984844 | 0.524342 | 0         |
| 327 | PBK       | 3 | 2 | -6.3605  | -5.34012 | OK | 0         | 478.6983939 | 0.485578 | 0         |
| 328 | PHF19     | 3 | 2 | -6.14263 | -6.67714 | OK | 0         | 241.2201096 | 0.244688 | 0         |
| 329 | PLK1      | 3 | 2 | -7.37335 | -6.0216  | OK | 0         | 415.7317079 | 0.42169  | 0         |
| 330 | PRC1      | 3 | 2 | -6.78877 | -5.69713 | OK | 0         | 505.0432295 | 0.512314 | 0         |
| 331 | PRR11     | 3 | 2 | -7.0282  | -6.39204 | OK | 0         | 317.0958097 | 0.321633 | 0         |
| 332 | PTTG1     | 3 | 2 | -6.30087 | -6.88225 | OK | 0         | 389.5862866 | 0.395202 | 0         |
| 333 | RACGAP1   | 3 | 2 | -6.87837 | -5.82092 | OK | 0         | 265.8963449 | 0.269714 | 0         |
| 334 | SAP30     | 3 | 2 | -6.62856 | -5.38204 | OK | 0         | 197.6123397 | 0.200452 | 0         |
| 335 | SGO1      | 3 | 2 | -6.40308 | -5.54335 | OK | 0         | 382.9713219 | 0.388466 | 0         |
| 336 | SGO2      | 3 | 2 | -7.08072 | -5.92029 | OK | 0         | 380.4967547 | 0.38596  | 0         |
| 337 | SMC4      | 3 | 2 | -6.67579 | -5.8764  | OK | 0         | 306.5606786 | 0.310976 | 0         |
| 338 | SPC25     | 3 | 2 | -6.34006 | -5.34115 | OK | 0         | 383.6302199 | 0.389129 | 0         |
| 339 | SPDL1     | 3 | 2 | -6.87277 | -5.84299 | OK | 0         | 162.0347877 | 0.164355 | 0         |
| 340 | STMN1     | 3 | 2 | -5.82439 | -6.72014 | OK | 0         | 471.9225507 | 0.478727 | 0         |
| 341 | TACC3     | 3 | 2 | -6.43857 | -5.42185 | OK | 0         | 372.5025199 | 0.37785  | 0         |
| 342 | TOP2A     | 3 | 2 | -6.92858 | -5.70179 | OK | 0         | 513.486736  | 0.520879 | 0         |
| 343 | TPX2      | 3 | 2 | -6.83594 | -5.78668 | OK | 0         | 506.3080196 | 0.513596 | 0         |
| 344 | TROAP     | 3 | 2 | -6.52557 | -6.87157 | OK | 0         | 288.1826309 | 0.292316 | 0         |
| 345 | TTK       | 3 | 2 | -6.79595 | -5.78075 | OK | 0         | 396.9420042 | 0.402639 | 0         |
| 346 | TUBA1B    | 3 | 2 | -5.95699 | -6.75562 | OK | 0         | 321.286051  | 0.325914 | 0         |
| 347 | TUBB      | 3 | 2 | -5.63881 | -6.60014 | OK | 0         | 298.4346713 | 0.302733 | 0         |
| 348 | UBE2C     | 3 | 2 | -7.23741 | -5.70497 | OK | 0         | 441.0608542 | 0.447406 | 0         |
| 349 | UBE2S     | 3 | 2 | -7.35072 | -5.93888 | OK | 0         | 200.7814907 | 0.203669 | 0         |
| 350 | A2ML1     | 4 | 1 | 1.891713 | -0.12064 | OK | 0         | 578.0125791 | 0.58635  | 0         |
| 351 | A4GALT    | 4 | 1 | 0.016242 | 0.500441 | OK | 0         | 285.3128117 | 0.289414 | 0         |
| 352 | AC005532. | 4 | 1 | 2.785486 | 1.009048 | OK | 0         | 280.409881  | 0.284419 | 0         |
| 353 | AC008397. | 4 | 1 | 0.830541 | 1.249374 | OK | 0         | 143.2849463 | 0.145339 | 0         |
| 354 | AC068587. | 4 | 1 | 0.675013 | 1.432837 | OK | 0         | 196.7178579 | 0.199541 | 0         |
| 355 | ACPP      | 4 | 1 | 2.342656 | 0.278526 | OK | 0         | 199.6201526 | 0.202487 | 0         |
| 356 | AGR2      | 4 | 1 | 2.474897 | 1.62014  | OK | 8.10E-113 | 22.54169602 | 0.022852 | 8.14E-113 |
| 357 | AIFM2     | 4 | 1 | 2.378798 | 2.138588 | OK | 0         | 100.4310324 | 0.101865 | 0         |
| 358 | AKR1B10   | 4 | 1 | 2.818513 | -0.77481 | OK | 0         | 225.3844686 | 0.228625 | 0         |

|     |           |   |   |          |          |    |   |             |          |   |
|-----|-----------|---|---|----------|----------|----|---|-------------|----------|---|
| 359 | AKR1C1    | 4 | 1 | 2.833771 | -0.82888 | OK | 0 | 84.04776588 | 0.085246 | 0 |
| 360 | AKR1C2    | 4 | 1 | 2.859662 | -0.81994 | OK | 0 | 107.320345  | 0.108855 | 0 |
| 361 | AKR1C3    | 4 | 1 | 2.872497 | -0.79995 | OK | 0 | 115.1200906 | 0.116766 | 0 |
| 362 | AL355312. | 4 | 1 | 2.920897 | 2.80667  | OK | 0 | 164.3823196 | 0.166712 | 0 |
| 363 | ALDH1A1   | 4 | 1 | 1.694271 | -0.67138 | OK | 0 | 166.3984131 | 0.16878  | 0 |
| 364 | ALDH3B2   | 4 | 1 | 0.922371 | 0.04813  | OK | 0 | 343.2903912 | 0.348235 | 0 |
| 365 | ALOX12    | 4 | 1 | 2.882485 | 1.17424  | OK | 0 | 235.8135734 | 0.239173 | 0 |
| 366 | ALOX15B   | 4 | 1 | 2.391708 | -0.47437 | OK | 0 | 68.19855221 | 0.069166 | 0 |
| 367 | ANKRD35   | 4 | 1 | 2.310583 | -0.383   | OK | 0 | 145.9227264 | 0.148013 | 0 |
| 368 | ANXA1     | 4 | 1 | 2.045873 | 1.193991 | OK | 0 | 250.8113796 | 0.254392 | 0 |
| 369 | ANXA3     | 4 | 1 | 0.921872 | 0.816581 | OK | 0 | 380.7749084 | 0.386263 | 0 |
| 370 | ASPG      | 4 | 1 | 1.754522 | 1.836863 | OK | 0 | 436.7374864 | 0.443033 | 0 |
| 371 | ATP13A4   | 4 | 1 | 0.249626 | 0.977228 | OK | 0 | 259.4040441 | 0.263128 | 0 |
| 372 | ATP1B1    | 4 | 1 | 1.334709 | 0.925744 | OK | 0 | 286.7203277 | 0.29085  | 0 |
| 373 | BEX4      | 4 | 1 | 2.87767  | 1.555563 | OK | 0 | 131.258638  | 0.133141 | 0 |
| 374 | BICDL2    | 4 | 1 | 1.032993 | 1.797529 | OK | 0 | 418.8785116 | 0.424916 | 0 |
| 375 | BNIP3     | 4 | 1 | 2.943675 | 1.725236 | OK | 0 | 216.0187422 | 0.219119 | 0 |
| 376 | C10orf99  | 4 | 1 | 2.477624 | -0.38263 | OK | 0 | 300.3851886 | 0.30471  | 0 |
| 377 | C15orf48  | 4 | 1 | 2.983682 | 2.79249  | OK | 0 | 499.9754921 | 0.507174 | 0 |
| 378 | C4orf3    | 4 | 1 | 2.075654 | 1.675033 | OK | 0 | 349.1688992 | 0.354198 | 0 |
| 379 | C8orf82   | 4 | 1 | 2.740574 | -0.10305 | OK | 0 | 129.4587772 | 0.131316 | 0 |
| 380 | CALB2     | 4 | 1 | 2.74079  | 2.808747 | OK | 0 | 230.5555349 | 0.233783 | 0 |
| 381 | CALML5    | 4 | 1 | 1.214829 | 1.378088 | OK | 0 | 329.1750199 | 0.333914 | 0 |
| 382 | CAPN14    | 4 | 1 | 0.013119 | 0.054206 | OK | 0 | 428.6675591 | 0.434848 | 0 |
| 383 | CASTOR1   | 4 | 1 | 2.523008 | 0.100629 | OK | 0 | 217.3463446 | 0.220467 | 0 |
| 384 | CBR3      | 4 | 1 | 2.661851 | -0.33671 | OK | 0 | 226.9621347 | 0.230228 | 0 |
| 385 | CCNYL1    | 4 | 1 | 2.590217 | 2.890558 | OK | 0 | 88.93180731 | 0.090196 | 0 |
| 386 | CD24      | 4 | 1 | 1.887668 | 1.186092 | OK | 0 | 620.4954414 | 0.629444 | 0 |
| 387 | CDA       | 4 | 1 | 2.855691 | 1.064485 | OK | 0 | 294.1648014 | 0.298381 | 0 |
| 388 | CDH26     | 4 | 1 | 0.053599 | 0.601023 | OK | 0 | 532.2038556 | 0.539874 | 0 |
| 389 | CEACAM1   | 4 | 1 | 0.515895 | 1.404806 | OK | 0 | 320.9092895 | 0.325517 | 0 |
| 390 | CEACAM5   | 4 | 1 | 0.372261 | 1.135503 | OK | 0 | 568.2811714 | 0.576472 | 0 |
| 391 | CEACAM6   | 4 | 1 | 0.283144 | 1.206619 | OK | 0 | 452.4860501 | 0.459007 | 0 |
| 392 | CES1      | 4 | 1 | 2.3606   | -0.42995 | OK | 0 | 246.4902038 | 0.250017 | 0 |
| 393 | CFD       | 4 | 1 | 1.187713 | 1.825721 | OK | 0 | 122.640353  | 0.124399 | 0 |
| 394 | CGN       | 4 | 1 | 0.209067 | 0.820116 | OK | 0 | 194.8267738 | 0.197619 | 0 |
| 395 | CITED4    | 4 | 1 | 2.740356 | -0.24382 | OK | 0 | 325.7651487 | 0.330459 | 0 |
| 396 | CLCA4     | 4 | 1 | 0.761373 | 0.817989 | OK | 0 | 482.5257374 | 0.489483 | 0 |
| 397 | CLDN10    | 4 | 1 | 2.529443 | 2.208148 | OK | 0 | 250.1852554 | 0.253675 | 0 |
| 398 | CLIC3     | 4 | 1 | 1.230177 | 1.439811 | OK | 0 | 614.1757048 | 0.623037 | 0 |
| 399 | CNFN      | 4 | 1 | 2.98389  | 2.639575 | OK | 0 | 409.1930547 | 0.415089 | 0 |
| 400 | CNN3      | 4 | 1 | 2.288359 | 0.575354 | OK | 0 | 357.4356518 | 0.362586 | 0 |
| 401 | COX7A1    | 4 | 1 | 2.97478  | 3.300049 | OK | 0 | 40.77811439 | 0.041349 | 0 |
| 402 | CPVL      | 4 | 1 | 1.721601 | -0.70395 | OK | 0 | 100.6883141 | 0.102125 | 0 |
| 403 | CRCT1     | 4 | 1 | 3.082563 | 2.963947 | OK | 0 | 534.7643131 | 0.542463 | 0 |
| 404 | CRISP3    | 4 | 1 | 2.897492 | 2.875373 | OK | 0 | 735.9159145 | 0.746439 | 0 |
| 405 | CRNN      | 4 | 1 | 2.821413 | 1.232228 | OK | 0 | 654.9954888 | 0.664442 | 0 |
| 406 | CRYAB     | 4 | 1 | 2.911975 | 1.436168 | OK | 0 | 233.3577469 | 0.236711 | 0 |
| 407 | CST3      | 4 | 1 | 1.679118 | 1.142904 | OK | 0 | 226.8616732 | 0.230121 | 0 |
| 408 | CST6      | 4 | 1 | 2.639604 | 2.887928 | OK | 0 | 511.3496995 | 0.518696 | 0 |
| 409 | CSTA      | 4 | 1 | 2.12954  | 1.450359 | OK | 0 | 337.1288839 | 0.341971 | 0 |
| 410 | CSTB      | 4 | 1 | 2.192769 | 1.327328 | OK | 0 | 319.268586  | 0.32384  | 0 |
| 411 | CTNBP1    | 4 | 1 | 2.674345 | -0.17579 | OK | 0 | 319.16856   | 0.323767 | 0 |
| 412 | CTTNBP2   | 4 | 1 | 1.952348 | -0.34842 | OK | 0 | 341.4477042 | 0.346365 | 0 |
| 413 | CWH43     | 4 | 1 | 2.460269 | 0.201596 | OK | 0 | 285.178642  | 0.289266 | 0 |
| 414 | CXCL17    | 4 | 1 | 0.921783 | 1.222796 | OK | 0 | 477.262265  | 0.484145 | 0 |
| 415 | CXXC5     | 4 | 1 | 0.79263  | 1.695409 | OK | 0 | 230.1887361 | 0.233499 | 0 |
| 416 | CYP2C18   | 4 | 1 | 1.678719 | -0.16493 | OK | 0 | 187.6605934 | 0.190353 | 0 |
| 417 | CYP4B1    | 4 | 1 | 1.479162 | -0.63646 | OK | 0 | 267.3179709 | 0.271166 | 0 |
| 418 | CYP51A1   | 4 | 1 | -0.95081 | 0.937862 | OK | 0 | 198.7919872 | 0.201651 | 0 |

|     |          |   |   |          |          |    |   |             |          |   |
|-----|----------|---|---|----------|----------|----|---|-------------|----------|---|
| 419 | CYSRT1   | 4 | 1 | 1.584584 | 2.066393 | OK | 0 | 625.8978119 | 0.634926 | 0 |
| 420 | DDAH2    | 4 | 1 | 0.487227 | 0.875252 | OK | 0 | 209.6080141 | 0.212623 | 0 |
| 421 | DEFB1    | 4 | 1 | 1.550191 | -0.67266 | OK | 0 | 305.7592893 | 0.310164 | 0 |
| 422 | DEGS2    | 4 | 1 | 2.481654 | -0.16399 | OK | 0 | 370.6941318 | 0.37603  | 0 |
| 423 | DIO2     | 4 | 1 | 0.31495  | 1.053826 | OK | 0 | 444.5257296 | 0.450924 | 0 |
| 424 | DMKN     | 4 | 1 | 1.002554 | 1.290453 | OK | 0 | 417.0286926 | 0.423041 | 0 |
| 425 | DNASE1L3 | 4 | 1 | 2.687181 | -0.6936  | OK | 0 | 60.31481784 | 0.06117  | 0 |
| 426 | DSC2     | 4 | 1 | 1.595103 | -0.39286 | OK | 0 | 493.7029115 | 0.500822 | 0 |
| 427 | DSG1     | 4 | 1 | 2.346275 | -0.18419 | OK | 0 | 214.1713862 | 0.21721  | 0 |
| 428 | DYNLT3   | 4 | 1 | 1.46437  | 0.097176 | OK | 0 | 459.416003  | 0.466041 | 0 |
| 429 | ECM1     | 4 | 1 | 3.085808 | 2.952061 | OK | 0 | 518.096523  | 0.525563 | 0 |
| 430 | EGLN3    | 4 | 1 | 0.061429 | 0.815331 | OK | 0 | 245.6607025 | 0.249195 | 0 |
| 431 | EHD3     | 4 | 1 | 0.093974 | 1.610521 | OK | 0 | 191.7791492 | 0.194533 | 0 |
| 432 | ELL2     | 4 | 1 | 1.705955 | -0.29746 | OK | 0 | 209.4195313 | 0.212432 | 0 |
| 433 | ELOVL4   | 4 | 1 | 0.739471 | 0.677094 | OK | 0 | 223.2936189 | 0.226502 | 0 |
| 434 | EMP1     | 4 | 1 | 2.82942  | 2.286886 | OK | 0 | 443.7120214 | 0.450108 | 0 |
| 435 | ENDOU    | 4 | 1 | 2.547215 | 0.610316 | OK | 0 | 334.4786733 | 0.339278 | 0 |
| 436 | EPB41L3  | 4 | 1 | 2.862269 | 1.611585 | OK | 0 | 257.5623751 | 0.261212 | 0 |
| 437 | EPHX3    | 4 | 1 | 1.341057 | 1.16126  | OK | 0 | 291.4868824 | 0.295684 | 0 |
| 438 | EREG     | 4 | 1 | 2.331188 | 1.988232 | OK | 0 | 235.7198365 | 0.239058 | 0 |
| 439 | ETNK2    | 4 | 1 | 2.509976 | -0.27409 | OK | 0 | 134.7491731 | 0.136673 | 0 |
| 440 | EVPL     | 4 | 1 | 0.337948 | 0.063773 | OK | 0 | 378.3322097 | 0.383785 | 0 |
| 441 | F3       | 4 | 1 | 2.918667 | 1.333382 | OK | 0 | 114.480609  | 0.116097 | 0 |
| 442 | FAM25A   | 4 | 1 | 2.948397 | 3.376667 | OK | 0 | 608.867759  | 0.617613 | 0 |
| 443 | FAM3B    | 4 | 1 | 0.796359 | 0.809433 | OK | 0 | 584.4285613 | 0.592859 | 0 |
| 444 | FAM3D    | 4 | 1 | 2.300569 | 1.917214 | OK | 0 | 663.9994596 | 0.673564 | 0 |
| 445 | FAM83A   | 4 | 1 | 0.172454 | 1.219733 | OK | 0 | 286.1997994 | 0.29032  | 0 |
| 446 | FETUB    | 4 | 1 | 0.283222 | 0.810892 | OK | 0 | 475.6023852 | 0.482433 | 0 |
| 447 | FGF11    | 4 | 1 | -0.05823 | 0.448319 | OK | 0 | 155.6722978 | 0.157902 | 0 |
| 448 | FGFBP1   | 4 | 1 | -0.96586 | 0.937649 | OK | 0 | 309.3057201 | 0.313762 | 0 |
| 449 | FMO2     | 4 | 1 | -0.15245 | 0.761232 | OK | 0 | 177.0366765 | 0.179581 | 0 |
| 450 | FNDC4    | 4 | 1 | 2.759022 | 2.182998 | OK | 0 | 306.9385248 | 0.311293 | 0 |
| 451 | FUOM     | 4 | 1 | 1.061342 | 1.679072 | OK | 0 | 103.8095339 | 0.105296 | 0 |
| 452 | GABRP    | 4 | 1 | 0.087931 | 0.249211 | OK | 0 | 375.323666  | 0.380732 | 0 |
| 453 | GADD45G  | 4 | 1 | 2.479284 | -0.25969 | OK | 0 | 98.44566144 | 0.09985  | 0 |
| 454 | GBP6     | 4 | 1 | 1.611603 | -0.21593 | OK | 0 | 512.5143507 | 0.519904 | 0 |
| 455 | GCNT3    | 4 | 1 | 0.260955 | 0.952298 | OK | 0 | 404.6933837 | 0.410509 | 0 |
| 456 | GDPD3    | 4 | 1 | 2.593174 | 0.719751 | OK | 0 | 469.1828156 | 0.475937 | 0 |
| 457 | GJB2     | 4 | 1 | 1.37193  | 0.681958 | OK | 0 | 355.6477572 | 0.360773 | 0 |
| 458 | GJB6     | 4 | 1 | 1.207641 | 0.704521 | OK | 0 | 402.2779436 | 0.408077 | 0 |
| 459 | GLTP     | 4 | 1 | 1.380558 | 0.891863 | OK | 0 | 304.6894249 | 0.309078 | 0 |
| 460 | GNG4     | 4 | 1 | 2.07548  | 1.869417 | OK | 0 | 431.5150323 | 0.437705 | 0 |
| 461 | GPR160   | 4 | 1 | 0.062666 | 0.886411 | OK | 0 | 167.3407471 | 0.169732 | 0 |
| 462 | GPX2     | 4 | 1 | 2.793055 | -0.80877 | OK | 0 | 133.2438973 | 0.135154 | 0 |
| 463 | GPX3     | 4 | 1 | 2.613266 | 0.909512 | OK | 0 | 283.5345129 | 0.287605 | 0 |
| 464 | GRHL3    | 4 | 1 | 1.21195  | -0.14088 | OK | 0 | 251.2249215 | 0.25484  | 0 |
| 465 | GSN      | 4 | 1 | 1.752859 | 0.796848 | OK | 0 | 376.292767  | 0.381714 | 0 |
| 466 | GSTA1    | 4 | 1 | 1.779266 | -0.62722 | OK | 0 | 137.3851127 | 0.139339 | 0 |
| 467 | GSTM3    | 4 | 1 | 2.777193 | -0.85057 | OK | 0 | 217.7896179 | 0.220923 | 0 |
| 468 | GSTT2B   | 4 | 1 | 2.679172 | 2.768602 | OK | 0 | 42.74445998 | 0.043344 | 0 |
| 469 | HIF1A    | 4 | 1 | 1.945038 | 0.138906 | OK | 0 | 149.890068  | 0.152043 | 0 |
| 470 | HMGCS1   | 4 | 1 | -0.91552 | 0.911791 | OK | 0 | 275.885265  | 0.279858 | 0 |
| 471 | HMOX2    | 4 | 1 | 1.807945 | 2.239631 | OK | 0 | 215.2434171 | 0.21834  | 0 |
| 472 | HOPX     | 4 | 1 | 2.457014 | 1.924053 | OK | 0 | 471.7445903 | 0.478547 | 0 |
| 473 | HPSE     | 4 | 1 | 2.156444 | 2.156605 | OK | 0 | 81.75021888 | 0.082913 | 0 |
| 474 | HS3ST1   | 4 | 1 | -0.01955 | 0.565166 | OK | 0 | 308.3170718 | 0.312757 | 0 |
| 475 | HSPA1A   | 4 | 1 | 2.025709 | -0.88918 | OK | 0 | 220.5169297 | 0.223689 | 0 |
| 476 | HSPA1B   | 4 | 1 | 1.987977 | -0.8351  | OK | 0 | 166.0934935 | 0.168481 | 0 |
| 477 | IDI1     | 4 | 1 | -0.99348 | 0.983613 | OK | 0 | 154.2160302 | 0.156431 | 0 |
| 478 | IFFO2    | 4 | 1 | 0.368857 | -0.03894 | OK | 0 | 285.3620682 | 0.28947  | 0 |

|     |           |   |   |          |          |    |   |             |          |   |
|-----|-----------|---|---|----------|----------|----|---|-------------|----------|---|
| 479 | IFI35     | 4 | 1 | -0.25795 | 0.058423 | OK | 0 | 174.3475072 | 0.176852 | 0 |
| 480 | IGFL1     | 4 | 1 | 2.898487 | 1.440987 | OK | 0 | 176.6862462 | 0.179208 | 0 |
| 481 | IL12A-AS1 | 4 | 1 | 2.602433 | 2.423913 | OK | 0 | 377.3523034 | 0.3827   | 0 |
| 482 | INSIG1    | 4 | 1 | -0.88381 | 0.945471 | OK | 0 | 142.6558754 | 0.144701 | 0 |
| 483 | ISG20     | 4 | 1 | 2.134494 | 1.835485 | OK | 0 | 260.467267  | 0.264207 | 0 |
| 484 | IVL       | 4 | 1 | 2.328467 | 0.443246 | OK | 0 | 548.5438079 | 0.556455 | 0 |
| 485 | KALRN     | 4 | 1 | 0.312571 | 0.790947 | OK | 0 | 192.7387168 | 0.195502 | 0 |
| 486 | KCNK7     | 4 | 1 | 2.536252 | -0.57966 | OK | 0 | 292.2925825 | 0.296501 | 0 |
| 487 | KIAA1211L | 4 | 1 | 1.704933 | -0.27034 | OK | 0 | 173.7964577 | 0.176292 | 0 |
| 488 | KIF21A    | 4 | 1 | 1.416156 | 0.667404 | OK | 0 | 240.6225903 | 0.244085 | 0 |
| 489 | KLK10     | 4 | 1 | 0.531004 | 1.157841 | OK | 0 | 303.5932559 | 0.307967 | 0 |
| 490 | KLK11     | 4 | 1 | 1.636212 | 0.602342 | OK | 0 | 442.831086  | 0.449215 | 0 |
| 491 | KLK12     | 4 | 1 | 0.345473 | 1.598014 | OK | 0 | 623.3935802 | 0.632373 | 0 |
| 492 | KLK13     | 4 | 1 | 0.474616 | 1.377214 | OK | 0 | 495.5938624 | 0.502741 | 0 |
| 493 | KLK6      | 4 | 1 | 0.396939 | 1.916518 | OK | 0 | 157.4716702 | 0.1597   | 0 |
| 494 | KLK7      | 4 | 1 | 0.513065 | 1.071659 | OK | 0 | 394.0594654 | 0.399727 | 0 |
| 495 | KLK8      | 4 | 1 | 0.59466  | 1.212487 | OK | 0 | 184.9105103 | 0.187569 | 0 |
| 496 | KRT24     | 4 | 1 | 0.514017 | 1.510684 | OK | 0 | 279.6687924 | 0.283669 | 0 |
| 497 | KRT4      | 4 | 1 | 1.337342 | -0.10778 | OK | 0 | 510.4046644 | 0.517761 | 0 |
| 498 | KRT6A     | 4 | 1 | 2.29938  | -0.22425 | OK | 0 | 489.094413  | 0.496141 | 0 |
| 499 | KRT6B     | 4 | 1 | 2.369385 | -0.19288 | OK | 0 | 379.5929138 | 0.385064 | 0 |
| 500 | KRT6C     | 4 | 1 | 2.39509  | -0.19643 | OK | 0 | 295.7432313 | 0.3      | 0 |
| 501 | KRT78     | 4 | 1 | 3.040286 | 3.064029 | OK | 0 | 676.0771032 | 0.6858   | 0 |
| 502 | KRTDAP    | 4 | 1 | 0.817564 | 1.374744 | OK | 0 | 86.4545668  | 0.087676 | 0 |
| 503 | LCN2      | 4 | 1 | 0.287852 | 2.102612 | OK | 0 | 406.9989418 | 0.412865 | 0 |
| 504 | LGALS7B   | 4 | 1 | 0.617082 | -0.05204 | OK | 0 | 297.1630148 | 0.301438 | 0 |
| 505 | LINC02487 | 4 | 1 | 2.338763 | 2.180424 | OK | 0 | 313.4188888 | 0.317835 | 0 |
| 506 | LIPH      | 4 | 1 | 0.696611 | 1.137707 | OK | 0 | 328.1725215 | 0.332871 | 0 |
| 507 | LPCAT4    | 4 | 1 | 0.042643 | 0.44259  | OK | 0 | 224.577213  | 0.227806 | 0 |
| 508 | LRRC8A    | 4 | 1 | 0.365403 | 0.177683 | OK | 0 | 245.6056258 | 0.249141 | 0 |
| 509 | LY6G6C    | 4 | 1 | 0.562589 | 1.142949 | OK | 0 | 270.3565806 | 0.274245 | 0 |
| 510 | LYPD2     | 4 | 1 | 2.941634 | 2.830833 | OK | 0 | 625.1571043 | 0.634153 | 0 |
| 511 | LYPD3     | 4 | 1 | 1.610132 | 0.84233  | OK | 0 | 476.2371706 | 0.483103 | 0 |
| 512 | MAF       | 4 | 1 | 1.601965 | -0.42772 | OK | 0 | 206.0983223 | 0.209063 | 0 |
| 513 | MAFB      | 4 | 1 | 2.128156 | -0.67614 | OK | 0 | 232.9020533 | 0.236254 | 0 |
| 514 | MAL       | 4 | 1 | 2.821852 | 1.165321 | OK | 0 | 597.542185  | 0.606161 | 0 |
| 515 | MAL2      | 4 | 1 | 1.590067 | 0.476338 | OK | 0 | 473.1410088 | 0.479962 | 0 |
| 516 | MBOAT2    | 4 | 1 | 0.428182 | 0.634142 | OK | 0 | 367.9772419 | 0.373278 | 0 |
| 517 | ME1       | 4 | 1 | 1.418652 | 0.551196 | OK | 0 | 214.381397  | 0.217458 | 0 |
| 518 | MGLL      | 4 | 1 | 2.435697 | -0.08866 | OK | 0 | 514.0350502 | 0.521448 | 0 |
| 519 | MGST1     | 4 | 1 | 2.816962 | -0.86092 | OK | 0 | 145.4212036 | 0.14751  | 0 |
| 520 | MIR210HG  | 4 | 1 | 2.529175 | 1.486825 | OK | 0 | 188.879432  | 0.19159  | 0 |
| 521 | MROH6     | 4 | 1 | 0.175719 | 1.77124  | OK | 0 | 189.8738339 | 0.192598 | 0 |
| 522 | MSMO1     | 4 | 1 | -0.96475 | 0.951216 | OK | 0 | 167.6398132 | 0.170048 | 0 |
| 523 | MT1X      | 4 | 1 | 1.249869 | -0.95343 | OK | 0 | 419.4349072 | 0.425482 | 0 |
| 524 | MUC15     | 4 | 1 | 1.499438 | -0.15659 | OK | 0 | 391.3346429 | 0.396974 | 0 |
| 525 | MUC21     | 4 | 1 | 2.914217 | 1.215436 | OK | 0 | 699.7974673 | 0.709878 | 0 |
| 526 | MUC4      | 4 | 1 | 0.076539 | 0.971408 | OK | 0 | 241.1563831 | 0.244621 | 0 |
| 527 | MYH14     | 4 | 1 | 0.457549 | 0.138987 | OK | 0 | 368.9494007 | 0.374265 | 0 |
| 528 | NAGK      | 4 | 1 | 2.319376 | 0.315768 | OK | 0 | 393.0135785 | 0.398679 | 0 |
| 529 | NBEAL2    | 4 | 1 | 0.38379  | 0.043907 | OK | 0 | 277.5770228 | 0.281573 | 0 |
| 530 | NDUFA4L2  | 4 | 1 | 2.797015 | 1.523151 | OK | 0 | 276.55743   | 0.280534 | 0 |
| 531 | NQO1      | 4 | 1 | 2.804524 | -0.76223 | OK | 0 | 235.9907708 | 0.239387 | 0 |
| 532 | NUAK2     | 4 | 1 | 0.500038 | 0.875809 | OK | 0 | 134.9488258 | 0.13688  | 0 |
| 533 | NUCB2     | 4 | 1 | 2.366095 | 0.279266 | OK | 0 | 442.5090941 | 0.448889 | 0 |
| 534 | NUDT8     | 4 | 1 | 2.789125 | -0.1283  | OK | 0 | 362.8969509 | 0.368127 | 0 |
| 535 | OAS1      | 4 | 1 | 1.002852 | 0.851389 | OK | 0 | 234.2392558 | 0.23761  | 0 |
| 536 | PALMD     | 4 | 1 | 2.44858  | 0.162384 | OK | 0 | 173.6776309 | 0.176173 | 0 |
| 537 | PAQR8     | 4 | 1 | 2.650169 | 0.643744 | OK | 0 | 176.6039156 | 0.179127 | 0 |
| 538 | PCDH1     | 4 | 1 | 0.242435 | 1.470965 | OK | 0 | 248.4782395 | 0.252048 | 0 |



|     |           |   |   |          |          |    |   |             |          |   |
|-----|-----------|---|---|----------|----------|----|---|-------------|----------|---|
| 539 | PDLIM2    | 4 | 1 | 2.020938 | 1.288282 | OK | 0 | 267.415289  | 0.271266 | 0 |
| 540 | PGD       | 4 | 1 | 0.832945 | -0.03596 | OK | 0 | 352.5557302 | 0.357636 | 0 |
| 541 | PHLDB3    | 4 | 1 | 0.85946  | 1.569552 | OK | 0 | 104.6262452 | 0.106123 | 0 |
| 542 | PI3       | 4 | 1 | 0.651783 | 1.354279 | OK | 0 | 407.2748079 | 0.413141 | 0 |
| 543 | PIM1      | 4 | 1 | 2.146766 | 1.915428 | OK | 0 | 263.4145094 | 0.267207 | 0 |
| 544 | PLAC8     | 4 | 1 | 0.144597 | 0.950613 | OK | 0 | 419.7971349 | 0.425848 | 0 |
| 545 | PLBD1     | 4 | 1 | 1.078558 | 1.830584 | OK | 0 | 281.9677579 | 0.286028 | 0 |
| 546 | PMM1      | 4 | 1 | 2.155952 | 1.748419 | OK | 0 | 207.2343136 | 0.210215 | 0 |
| 547 | PPM1K     | 4 | 1 | 1.83032  | -0.58099 | OK | 0 | 138.4886736 | 0.140474 | 0 |
| 548 | PPP1R3C   | 4 | 1 | 0.153254 | 1.807265 | OK | 0 | 237.4020019 | 0.240803 | 0 |
| 549 | PRSS3     | 4 | 1 | 0.542852 | 1.180968 | OK | 0 | 629.5136468 | 0.638585 | 0 |
| 550 | PTGR1     | 4 | 1 | 2.571143 | -0.5481  | OK | 0 | 281.6081875 | 0.285664 | 0 |
| 551 | PTN       | 4 | 1 | 1.697821 | -0.68535 | OK | 0 | 326.1350535 | 0.330834 | 0 |
| 552 | RAB10     | 4 | 1 | 1.839725 | 0.852698 | OK | 0 | 370.9534977 | 0.376298 | 0 |
| 553 | RAET1E    | 4 | 1 | 1.454728 | 0.26924  | OK | 0 | 328.9915155 | 0.333727 | 0 |
| 554 | RAET1L    | 4 | 1 | 0.805305 | 1.064348 | OK | 0 | 355.554163  | 0.360668 | 0 |
| 555 | RASGRP1   | 4 | 1 | -0.11482 | 0.029162 | OK | 0 | 246.8680743 | 0.250418 | 0 |
| 556 | RBP1      | 4 | 1 | 2.246384 | 1.950141 | OK | 0 | 66.85399463 | 0.067804 | 0 |
| 557 | RBP7      | 4 | 1 | 2.573333 | 1.235962 | OK | 0 | 209.4662368 | 0.212477 | 0 |
| 558 | RHCG      | 4 | 1 | 1.694526 | 1.071362 | OK | 0 | 628.5327879 | 0.637594 | 0 |
| 559 | RHOD      | 4 | 1 | 1.926361 | 1.449176 | OK | 0 | 296.7577027 | 0.301032 | 0 |
| 560 | RTKN2     | 4 | 1 | 2.170628 | 2.034021 | OK | 0 | 206.497866  | 0.209466 | 0 |
| 561 | S100A12   | 4 | 1 | 2.697557 | 2.427675 | OK | 0 | 288.4841636 | 0.292622 | 0 |
| 562 | S100A14   | 4 | 1 | 2.043817 | 1.279993 | OK | 0 | 107.595503  | 0.109127 | 0 |
| 563 | S100A4    | 4 | 1 | 1.69841  | 1.330493 | OK | 0 | 78.06581567 | 0.079181 | 0 |
| 564 | S100A6    | 4 | 1 | 2.081936 | 1.355508 | OK | 0 | 175.1576173 | 0.177668 | 0 |
| 565 | S100A7    | 4 | 1 | 0.506301 | 1.987516 | OK | 0 | 182.4658658 | 0.185082 | 0 |
| 566 | S100A8    | 4 | 1 | 2.121369 | -1.02203 | OK | 0 | 350.5692893 | 0.355615 | 0 |
| 567 | SAMD5     | 4 | 1 | 1.96612  | -0.2933  | OK | 0 | 212.2935678 | 0.215333 | 0 |
| 568 | SBSN      | 4 | 1 | 1.09376  | 1.207814 | OK | 0 | 506.6516845 | 0.513957 | 0 |
| 569 | SCD       | 4 | 1 | -0.84    | 0.868824 | OK | 0 | 209.145983  | 0.212153 | 0 |
| 570 | SCGB1A1   | 4 | 1 | 1.448553 | 0.937721 | OK | 0 | 85.4408255  | 0.086658 | 0 |
| 571 | SCUBE2    | 4 | 1 | 0.044077 | 0.279219 | OK | 0 | 170.772135  | 0.17322  | 0 |
| 572 | SDR16C5   | 4 | 1 | 1.681411 | 0.284152 | OK | 0 | 386.9208303 | 0.392498 | 0 |
| 573 | SERPINB1  | 4 | 1 | 2.124381 | 0.752238 | OK | 0 | 461.2169169 | 0.467864 | 0 |
| 574 | SERPINB11 | 4 | 1 | 2.617615 | 0.656965 | OK | 0 | 75.04807329 | 0.07611  | 0 |
| 575 | SERPINB6  | 4 | 1 | 1.261897 | 1.348104 | OK | 0 | 302.9232283 | 0.307287 | 0 |
| 576 | SF3B3     | 4 | 1 | 2.726534 | 1.47483  | OK | 0 | 169.2326086 | 0.171664 | 0 |
| 577 | SFTA2     | 4 | 1 | 2.84756  | 2.707777 | OK | 0 | 484.0419175 | 0.490961 | 0 |
| 578 | SH3GL1    | 4 | 1 | 0.254033 | 1.882952 | OK | 0 | 270.8452574 | 0.274745 | 0 |
| 579 | SHROOM3   | 4 | 1 | 2.253306 | 2.040335 | OK | 0 | 238.2262222 | 0.241646 | 0 |
| 580 | SLC26A2   | 4 | 1 | 1.112813 | -0.32135 | OK | 0 | 257.2039339 | 0.260906 | 0 |
| 581 | SLC35C1   | 4 | 1 | 0.980234 | 1.880277 | OK | 0 | 194.9546313 | 0.197755 | 0 |
| 582 | SLPI      | 4 | 1 | 0.859083 | 1.300873 | OK | 0 | 544.0574276 | 0.551905 | 0 |
| 583 | SLURP1    | 4 | 1 | 2.829994 | 1.155083 | OK | 0 | 594.8192823 | 0.603392 | 0 |
| 584 | SMAGP     | 4 | 1 | 1.520575 | 1.925748 | OK | 0 | 349.3645672 | 0.354399 | 0 |
| 585 | SMIM5     | 4 | 1 | 1.426348 | 1.577802 | OK | 0 | 487.5480726 | 0.494577 | 0 |
| 586 | SNX31     | 4 | 1 | 0.59056  | 0.757567 | OK | 0 | 219.0628636 | 0.222205 | 0 |
| 587 | SPAG17    | 4 | 1 | 1.737239 | -0.26933 | OK | 0 | 227.284024  | 0.230549 | 0 |
| 588 | SPINK5    | 4 | 1 | 1.724913 | 0.030584 | OK | 0 | 579.7515218 | 0.588112 | 0 |
| 589 | SPINK7    | 4 | 1 | 3.047699 | 2.812878 | OK | 0 | 605.8485447 | 0.614539 | 0 |
| 590 | SPRR1A    | 4 | 1 | 1.754708 | 1.922407 | OK | 0 | 392.3951057 | 0.398041 | 0 |
| 591 | SPRR1B    | 4 | 1 | 0.537958 | 1.829924 | OK | 0 | 378.2818572 | 0.383733 | 0 |
| 592 | SPRR2A    | 4 | 1 | 0.230627 | 2.248157 | OK | 0 | 310.9490761 | 0.315425 | 0 |
| 593 | SPRR2D    | 4 | 1 | 0.228177 | 2.289025 | OK | 0 | 378.9342593 | 0.384366 | 0 |
| 594 | SPRR2E    | 4 | 1 | 0.292071 | 2.122066 | OK | 0 | 232.6424019 | 0.235981 | 0 |
| 595 | SPRR2F    | 4 | 1 | 0.327571 | 2.066921 | OK | 0 | 45.12483153 | 0.045674 | 0 |
| 596 | SPRR3     | 4 | 1 | 0.452652 | 0.557017 | OK | 0 | 489.8141973 | 0.496877 | 0 |
| 597 | SQLE      | 4 | 1 | -0.96074 | 0.928281 | OK | 0 | 238.350283  | 0.241781 | 0 |
| 598 | SRPX2     | 4 | 1 | 2.283137 | 2.374033 | OK | 0 | 261.7557817 | 0.265484 | 0 |

|               |   |   |          |          |    |           |             |          |           |
|---------------|---|---|----------|----------|----|-----------|-------------|----------|-----------|
| 599 ST3GAL4   | 4 | 1 | 2.348349 | 2.099585 | OK | 0         | 460.4004572 | 0.466986 | 0         |
| 600 STN1      | 4 | 1 | 1.917301 | 2.140529 | OK | 0         | 313.9247032 | 0.318446 | 0         |
| 601 SUCO      | 4 | 1 | 2.346721 | 0.310317 | OK | 0         | 66.78028391 | 0.067731 | 0         |
| 602 SULT2B1   | 4 | 1 | 1.283355 | 0.90419  | OK | 0         | 550.0032649 | 0.557936 | 0         |
| 603 TGM1      | 4 | 1 | 1.230725 | 0.828541 | OK | 0         | 437.7703088 | 0.44408  | 0         |
| 604 TGM3      | 4 | 1 | 2.873058 | 1.111881 | OK | 0         | 660.8776151 | 0.670402 | 0         |
| 605 TM7SF2    | 4 | 1 | 0.997985 | 1.042426 | OK | 0         | 508.0459673 | 0.515371 | 0         |
| 606 TMEM154   | 4 | 1 | 1.304725 | 0.400205 | OK | 0         | 331.3103783 | 0.336084 | 0         |
| 607 TMEM184   | 4 | 1 | 0.453562 | 0.09951  | OK | 0         | 257.9570182 | 0.261668 | 0         |
| 608 TMEM265   | 4 | 1 | 1.326204 | 1.658581 | OK | 0         | 382.3852645 | 0.387895 | 0         |
| 609 TMEM45B   | 4 | 1 | 0.345424 | 0.973879 | OK | 0         | 457.9010382 | 0.464497 | 0         |
| 610 TMEM79    | 4 | 1 | 1.57528  | 0.764211 | OK | 0         | 280.1790486 | 0.284214 | 0         |
| 611 TMPRSS11  | 4 | 1 | 2.823402 | 2.631305 | OK | 0         | 713.8195537 | 0.724078 | 0         |
| 612 TP53I3    | 4 | 1 | 2.734518 | 0.933128 | OK | 0         | 274.306019  | 0.278255 | 0         |
| 613 TPRG1     | 4 | 1 | 2.007654 | 1.882388 | OK | 0         | 530.754327  | 0.538401 | 0         |
| 614 TRNP1     | 4 | 1 | 0.038939 | 0.50024  | OK | 0         | 420.8161194 | 0.426882 | 0         |
| 615 TSPAN3    | 4 | 1 | -0.11122 | 0.357103 | OK | 0         | 278.3696823 | 0.282379 | 0         |
| 616 TST       | 4 | 1 | 1.293028 | 1.491884 | OK | 0         | 360.9137332 | 0.366115 | 0         |
| 617 TUBA4A    | 4 | 1 | 2.469003 | 0.029911 | OK | 0         | 300.8033343 | 0.305136 | 0         |
| 618 UPK1B     | 4 | 1 | 0.215961 | 0.890304 | OK | 0         | 147.9459828 | 0.150053 | 0         |
| 619 UPK3BL1   | 4 | 1 | 1.404048 | 1.797196 | OK | 0         | 359.6832323 | 0.364866 | 0         |
| 620 VAT1      | 4 | 1 | 0.079908 | 1.560359 | OK | 0         | 294.9174343 | 0.299164 | 0         |
| 621 WNK4      | 4 | 1 | 1.570086 | -0.22962 | OK | 0         | 226.5163455 | 0.229769 | 0         |
| 622 WNT5A     | 4 | 1 | 1.877451 | -0.10791 | OK | 0         | 161.7628873 | 0.164081 | 0         |
| 623 ZBED2     | 4 | 1 | 2.91416  | 1.823195 | OK | 0         | 136.8986165 | 0.138827 | 0         |
| 624 ZDHHC21   | 4 | 1 | 1.375249 | 0.227309 | OK | 0         | 77.28935721 | 0.078391 | 0         |
| 625 ABLIM1    | 5 | 1 | -0.21718 | 3.794879 | OK | 0         | 327.5709265 | 0.332291 | 0         |
| 626 ABLIM3    | 5 | 1 | 1.503048 | 4.188348 | OK | 0         | 422.3491115 | 0.428383 | 0         |
| 627 AC004816. | 5 | 1 | 1.851445 | 3.969704 | OK | 0         | 241.5058012 | 0.244973 | 0         |
| 628 AC006333. | 5 | 1 | 2.135271 | 4.528072 | OK | 0         | 96.67960308 | 0.098057 | 0         |
| 629 ACADM     | 5 | 1 | 1.650184 | 3.311115 | OK | 0         | 177.5233061 | 0.180075 | 0         |
| 630 ADGRF1    | 5 | 1 | 0.548775 | 3.839283 | OK | 0         | 319.8729142 | 0.324472 | 0         |
| 631 ADIPOR1   | 5 | 1 | 1.811903 | 3.611346 | OK | 0         | 169.9591125 | 0.172402 | 0         |
| 632 ADIRF     | 5 | 1 | 2.665995 | 3.774622 | OK | 0         | 311.1721144 | 0.315655 | 0         |
| 633 AFDN      | 5 | 1 | -0.8059  | 3.313125 | OK | 0         | 299.8386758 | 0.304158 | 0         |
| 634 AGFG2     | 5 | 1 | 0.393171 | 3.175922 | OK | 0         | 118.2191598 | 0.119908 | 0         |
| 635 AIF1L     | 5 | 1 | 2.70897  | 3.52031  | OK | 0         | 559.0065887 | 0.567029 | 0         |
| 636 AL121761. | 5 | 1 | 0.752995 | 2.716315 | OK | 0         | 390.2613009 | 0.395876 | 0         |
| 637 AL121933. | 5 | 1 | 0.371199 | 2.828874 | OK | 0         | 116.2867347 | 0.117875 | 0         |
| 638 AL133453. | 5 | 1 | 0.284853 | 3.984752 | OK | 0         | 164.2049455 | 0.166556 | 0         |
| 639 AL512274. | 5 | 1 | -0.38873 | 3.327168 | OK | 0         | 202.180458  | 0.205084 | 0         |
| 640 AL627171. | 5 | 1 | 0.66012  | 3.449998 | OK | 2.57E-119 | 23.19471124 | 0.023516 | 2.59E-119 |
| 641 ALDH1A3   | 5 | 1 | 0.683516 | 4.196034 | OK | 0         | 343.992798  | 0.348919 | 0         |
| 642 ANGPTL4   | 5 | 1 | 0.859333 | 2.25081  | OK | 0         | 101.3838166 | 0.102834 | 0         |
| 643 ANXA11    | 5 | 1 | 1.525562 | 3.458153 | OK | 0         | 232.8567725 | 0.236208 | 0         |
| 644 ANXA9     | 5 | 1 | 1.158595 | 3.677791 | OK | 0         | 569.6644374 | 0.577825 | 0         |
| 645 AP000866. | 5 | 1 | 2.281986 | 4.074777 | OK | 0         | 282.3087951 | 0.286275 | 0         |
| 646 ARHGAP27  | 5 | 1 | 0.6042   | 3.512483 | OK | 0         | 161.8326417 | 0.164152 | 0         |
| 647 ARHGDIB   | 5 | 1 | 1.870289 | 3.002141 | OK | 0         | 101.4788249 | 0.102926 | 0         |
| 648 ATP6V1C2  | 5 | 1 | 0.852707 | 4.168924 | OK | 0         | 489.3704892 | 0.496324 | 0         |
| 649 AVPI1     | 5 | 1 | 1.252371 | 5.156239 | OK | 0         | 86.16357186 | 0.087393 | 0         |
| 650 B3GNT3    | 5 | 1 | 0.959854 | 3.224969 | OK | 0         | 409.9786668 | 0.415811 | 0         |
| 651 B3GNT8    | 5 | 1 | 0.836993 | 2.476716 | OK | 0         | 131.5788502 | 0.133463 | 0         |
| 652 B4GALT5   | 5 | 1 | 0.114756 | 3.200645 | OK | 0         | 121.3325945 | 0.123071 | 0         |
| 653 BAIAP2L2  | 5 | 1 | 2.360196 | 3.156896 | OK | 0         | 204.8559365 | 0.207764 | 0         |
| 654 BCAS1     | 5 | 1 | 0.791617 | 2.966411 | OK | 0         | 226.2373063 | 0.229458 | 0         |
| 655 BICDL1    | 5 | 1 | 1.411277 | 4.532831 | OK | 0         | 89.13088503 | 0.090403 | 0         |
| 656 BX255925. | 5 | 1 | 1.477151 | 2.671067 | OK | 0         | 227.5627156 | 0.230835 | 0         |
| 657 C15orf62  | 5 | 1 | 1.008478 | 3.177142 | OK | 0         | 272.4061085 | 0.276294 | 0         |
| 658 C1orf116  | 5 | 1 | -0.06089 | 3.797162 | OK | 0         | 260.1860847 | 0.263932 | 0         |

|                |   |   |          |          |    |           |             |          |           |
|----------------|---|---|----------|----------|----|-----------|-------------|----------|-----------|
| 659 C5orf66-AS | 5 | 1 | 2.320604 | 4.171162 | OK | 0         | 177.4219913 | 0.179972 | 0         |
| 660 C6orf132   | 5 | 1 | 1.550416 | 4.281843 | OK | 0         | 324.951936  | 0.329634 | 0         |
| 661 CAMK2N1    | 5 | 1 | 1.366101 | 3.570694 | OK | 0         | 720.0195302 | 0.73036  | 0         |
| 662 CAPN5      | 5 | 1 | 0.659942 | 3.134356 | OK | 0         | 206.50282   | 0.209451 | 0         |
| 663 CASP8      | 5 | 1 | 1.744439 | 4.656468 | OK | 0         | 51.36895228 | 0.052097 | 0         |
| 664 CCDC127    | 5 | 1 | 1.84141  | 3.403882 | OK | 0         | 88.04063806 | 0.089296 | 0         |
| 665 CCNG2      | 5 | 1 | 0.089775 | 3.817275 | OK | 0         | 309.511388  | 0.313961 | 0         |
| 666 CD59       | 5 | 1 | 1.786743 | 2.361181 | OK | 0         | 285.6603327 | 0.289774 | 0         |
| 667 CD68       | 5 | 1 | 1.048224 | 2.470703 | OK | 0         | 146.6964098 | 0.148798 | 0         |
| 668 CDC42EP5   | 5 | 1 | 1.02867  | 2.805127 | OK | 0         | 119.8495075 | 0.121568 | 0         |
| 669 CDKN2AIP   | 5 | 1 | -0.60176 | 3.547562 | OK | 0         | 181.2291134 | 0.183835 | 0         |
| 670 CEACAM7    | 5 | 1 | 0.550713 | 2.842703 | OK | 0         | 121.9883098 | 0.123644 | 0         |
| 671 CFL2       | 5 | 1 | 2.030293 | 3.209031 | OK | 1.09E-290 | 36.41840935 | 0.036928 | 1.10E-290 |
| 672 CKB        | 5 | 1 | 2.001853 | 3.755931 | OK | 0         | 120.3262199 | 0.122052 | 0         |
| 673 CLIP1      | 5 | 1 | -0.85947 | 2.905122 | OK | 0         | 309.4371327 | 0.313895 | 0         |
| 674 CPEB4      | 5 | 1 | -0.2317  | 3.266992 | OK | 0         | 169.5389228 | 0.171973 | 0         |
| 675 CPPED1     | 5 | 1 | 2.085446 | 3.735493 | OK | 0         | 163.1978539 | 0.165542 | 0         |
| 676 CRYM       | 5 | 1 | 1.917867 | 4.557876 | OK | 0         | 364.347147  | 0.369392 | 0         |
| 677 CTSV       | 5 | 1 | 1.107496 | 3.798141 | OK | 0         | 224.6085663 | 0.227823 | 0         |
| 678 CTTNBP2N   | 5 | 1 | -0.71848 | 3.646636 | OK | 0         | 153.6084369 | 0.155814 | 0         |
| 679 CTTOR      | 5 | 1 | 1.116177 | 3.802751 | OK | 0         | 142.4010132 | 0.144432 | 0         |
| 680 DDIT4      | 5 | 1 | 0.896958 | 2.290771 | OK | 0         | 66.00636315 | 0.066947 | 0         |
| 681 DENND10    | 5 | 1 | 1.980604 | 2.828616 | OK | 0         | 144.8079838 | 0.146887 | 0         |
| 682 DHRS9      | 5 | 1 | 1.585833 | 4.68469  | OK | 0         | 693.6118164 | 0.703454 | 0         |
| 683 DNAJA4     | 5 | 1 | -0.55824 | 2.998199 | OK | 0         | 74.40412268 | 0.075464 | 0         |
| 684 DNAJC5     | 5 | 1 | 1.229144 | 3.947332 | OK | 0         | 138.0881593 | 0.140069 | 0         |
| 685 DOCK9      | 5 | 1 | -0.41522 | 3.633717 | OK | 0         | 144.7966763 | 0.146873 | 0         |
| 686 DTX2       | 5 | 1 | 0.69056  | 3.525753 | OK | 0         | 121.0784942 | 0.122814 | 0         |
| 687 DUOX2      | 5 | 1 | 0.207683 | 2.870212 | OK | 0         | 90.99370595 | 0.092289 | 0         |
| 688 DUOXA2     | 5 | 1 | 0.234776 | 2.687604 | OK | 0         | 97.45812282 | 0.098786 | 0         |
| 689 DUSP4      | 5 | 1 | 1.816091 | 4.581932 | OK | 0         | 385.3263131 | 0.390708 | 0         |
| 690 ELF3       | 5 | 1 | 1.00227  | 2.629482 | OK | 0         | 306.605412  | 0.311022 | 0         |
| 691 ELF3-AS1   | 5 | 1 | 1.94126  | 4.355634 | OK | 0         | 278.6263531 | 0.282592 | 0         |
| 692 EPS8L1     | 5 | 1 | 0.754542 | 3.745923 | OK | 0         | 529.1657014 | 0.536786 | 0         |
| 693 EPS8L2     | 5 | 1 | 1.287297 | 3.232457 | OK | 0         | 231.9668079 | 0.235305 | 0         |
| 694 ESAM       | 5 | 1 | 1.521073 | 4.614385 | OK | 0         | 512.8087214 | 0.520027 | 0         |
| 695 FAM107B    | 5 | 1 | 1.112191 | 4.82698  | OK | 0         | 177.8900624 | 0.18043  | 0         |
| 696 FBXO32     | 5 | 1 | 1.164076 | 4.145256 | OK | 0         | 223.7851275 | 0.227002 | 0         |
| 697 FBXO34     | 5 | 1 | -0.49435 | 3.499713 | OK | 0         | 138.5374189 | 0.140525 | 0         |
| 698 FBXW11     | 5 | 1 | -0.57365 | 3.765322 | OK | 0         | 83.83945136 | 0.085037 | 0         |
| 699 FCHO2      | 5 | 1 | -0.79349 | 3.428331 | OK | 0         | 219.8072272 | 0.222969 | 0         |
| 700 FRMD4B     | 5 | 1 | -0.86873 | 2.61828  | OK | 0         | 234.6813625 | 0.238059 | 0         |
| 701 FTH1       | 5 | 1 | 2.290753 | 4.189312 | OK | 0         | 204.1897415 | 0.20712  | 0         |
| 702 FUT3       | 5 | 1 | 0.442447 | 3.280182 | OK | 0         | 413.1890585 | 0.419138 | 0         |
| 703 FUT6       | 5 | 1 | 0.545535 | 3.329131 | OK | 0         | 382.9857088 | 0.38848  | 0         |
| 704 GABARAPL   | 5 | 1 | 2.326746 | 4.353869 | OK | 0         | 237.2393712 | 0.240654 | 0         |
| 705 GALNT1     | 5 | 1 | -0.6475  | 3.675255 | OK | 0         | 263.3999098 | 0.267192 | 0         |
| 706 GCC2       | 5 | 1 | -0.07907 | 3.961014 | OK | 0         | 100.5941233 | 0.102034 | 0         |
| 707 GCHFR      | 5 | 1 | 1.234853 | 3.585375 | OK | 0         | 226.9033018 | 0.230168 | 0         |
| 708 GFOD2      | 5 | 1 | 0.210803 | 3.698658 | OK | 0         | 99.32999089 | 0.100749 | 0         |
| 709 GMDS       | 5 | 1 | 2.136051 | 2.48588  | OK | 0         | 239.7198196 | 0.243167 | 0         |
| 710 GNA15      | 5 | 1 | 1.357638 | 3.187749 | OK | 0         | 264.9053798 | 0.268719 | 0         |
| 711 GPRC5A     | 5 | 1 | 1.185082 | 4.240656 | OK | 0         | 212.3383391 | 0.215374 | 0         |
| 712 GPT2       | 5 | 1 | 1.065449 | 3.264035 | OK | 0         | 174.4665032 | 0.176973 | 0         |
| 713 GRHL1      | 5 | 1 | -0.45495 | 2.886757 | OK | 0         | 353.7192684 | 0.358814 | 0         |
| 714 H19        | 5 | 1 | 1.840775 | 2.769955 | OK | 0         | 137.5867092 | 0.139557 | 0         |
| 715 H1FO       | 5 | 1 | 0.761058 | 2.470833 | OK | 0         | 189.7791318 | 0.192508 | 0         |
| 716 H2AFJ      | 5 | 1 | 2.400451 | 4.163906 | OK | 0         | 269.0300459 | 0.272904 | 0         |
| 717 HEBP2      | 5 | 1 | 2.182239 | 3.286149 | OK | 0         | 362.6946454 | 0.367919 | 0         |
| 718 HLCS       | 5 | 1 | 2.068586 | 4.209117 | OK | 0         | 85.73277037 | 0.086951 | 0         |

|               |   |   |          |          |    |   |             |          |   |
|---------------|---|---|----------|----------|----|---|-------------|----------|---|
| 719 HMOX1     | 5 | 1 | 0.779808 | 4.198033 | OK | 0 | 448.5879042 | 0.454981 | 0 |
| 720 HOTAIRM1  | 5 | 1 | 2.213121 | 4.560225 | OK | 0 | 95.55791247 | 0.096925 | 0 |
| 721 HS3ST6    | 5 | 1 | 2.336584 | 4.240201 | OK | 0 | 144.1704474 | 0.146236 | 0 |
| 722 HSPB8     | 5 | 1 | 0.30416  | 3.347195 | OK | 0 | 271.3592445 | 0.275262 | 0 |
| 723 IL1A      | 5 | 1 | 1.546709 | 4.849163 | OK | 0 | 257.9598712 | 0.261593 | 0 |
| 724 IL36A     | 5 | 1 | 1.322486 | 4.879153 | OK | 0 | 602.4112865 | 0.610955 | 0 |
| 725 IL36RN    | 5 | 1 | 0.264174 | 2.664308 | OK | 0 | 221.0506508 | 0.224128 | 0 |
| 726 ITSX2     | 5 | 1 | -0.66939 | 3.280333 | OK | 0 | 203.8113867 | 0.206742 | 0 |
| 727 KATNBL1   | 5 | 1 | 1.925369 | 3.441823 | OK | 0 | 164.5362015 | 0.1669   | 0 |
| 728 KAZN      | 5 | 1 | 1.359249 | 3.553072 | OK | 0 | 247.0795528 | 0.250635 | 0 |
| 729 KIFC3     | 5 | 1 | 1.571456 | 4.702668 | OK | 0 | 263.9422913 | 0.267695 | 0 |
| 730 KRT23     | 5 | 1 | 0.871363 | 2.97825  | OK | 0 | 194.875347  | 0.19761  | 0 |
| 731 KRT7      | 5 | 1 | 1.646416 | 2.87513  | OK | 0 | 200.9638865 | 0.203845 | 0 |
| 732 KRT80     | 5 | 1 | -0.29523 | 2.774517 | OK | 0 | 433.1171235 | 0.439351 | 0 |
| 733 LEXM      | 5 | 1 | 1.272289 | 3.287549 | OK | 0 | 311.254817  | 0.315634 | 0 |
| 734 LGALS3    | 5 | 1 | 2.16017  | 4.488221 | OK | 0 | 222.8252583 | 0.226024 | 0 |
| 735 LINC02303 | 5 | 1 | 2.070167 | 3.185497 | OK | 0 | 360.8859439 | 0.365871 | 0 |
| 736 LIPE-AS1  | 5 | 1 | 2.196977 | 3.699196 | OK | 0 | 105.8625952 | 0.107358 | 0 |
| 737 LMO2      | 5 | 1 | 0.924346 | 2.913144 | OK | 0 | 290.3298077 | 0.294458 | 0 |
| 738 LMO7      | 5 | 1 | -0.66431 | 3.485337 | OK | 0 | 335.8673351 | 0.340707 | 0 |
| 739 LPIN2     | 5 | 1 | 0.891192 | 4.190341 | OK | 0 | 253.9798394 | 0.257589 | 0 |
| 740 LRG1      | 5 | 1 | 0.588316 | 2.907019 | OK | 0 | 63.62816472 | 0.064533 | 0 |
| 741 LY6K      | 5 | 1 | 2.176342 | 4.376997 | OK | 0 | 109.3602321 | 0.110926 | 0 |
| 742 MAB21L4   | 5 | 1 | 1.804627 | 2.646532 | OK | 0 | 455.2922248 | 0.461857 | 0 |
| 743 MACC1     | 5 | 1 | -0.33058 | 3.607851 | OK | 0 | 166.5992575 | 0.168991 | 0 |
| 744 MALL      | 5 | 1 | -0.33501 | 3.737777 | OK | 0 | 505.074935  | 0.512359 | 0 |
| 745 MAP1LC3A  | 5 | 1 | 2.415849 | 4.099238 | OK | 0 | 233.0291241 | 0.236371 | 0 |
| 746 MAPK3     | 5 | 1 | 1.143363 | 3.356911 | OK | 0 | 183.2077446 | 0.18584  | 0 |
| 747 MAPK8     | 5 | 1 | 1.438809 | 4.940138 | OK | 0 | 77.64106605 | 0.078747 | 0 |
| 748 5-Mar     | 5 | 1 | 2.121731 | 4.037055 | OK | 0 | 186.8426922 | 0.189529 | 0 |
| 749 MDFIC     | 5 | 1 | 1.650656 | 3.576622 | OK | 0 | 93.29667592 | 0.09463  | 0 |
| 750 METRNL    | 5 | 1 | 1.661726 | 3.070854 | OK | 0 | 465.5651301 | 0.472278 | 0 |
| 751 MGAT1     | 5 | 1 | 1.345755 | 3.920425 | OK | 0 | 152.810058  | 0.155004 | 0 |
| 752 MPRIP     | 5 | 1 | 1.50643  | 4.165703 | OK | 0 | 145.1902765 | 0.147274 | 0 |
| 753 MPZL3     | 5 | 1 | 0.423167 | 3.243093 | OK | 0 | 186.8303627 | 0.1895   | 0 |
| 754 MTERF4    | 5 | 1 | 2.188768 | 3.515887 | OK | 0 | 73.91733955 | 0.074972 | 0 |
| 755 MUC1      | 5 | 1 | 0.063736 | 3.389034 | OK | 0 | 432.0390421 | 0.438262 | 0 |
| 756 MUC20     | 5 | 1 | 1.590833 | 2.764943 | OK | 0 | 325.1346702 | 0.329816 | 0 |
| 757 MUC22     | 5 | 1 | 1.379609 | 4.635846 | OK | 0 | 304.9171991 | 0.309142 | 0 |
| 758 MXD1      | 5 | 1 | 0.794135 | 4.421854 | OK | 0 | 351.7035145 | 0.356769 | 0 |
| 759 MYEOV     | 5 | 1 | 2.141989 | 3.434928 | OK | 0 | 254.0325606 | 0.25768  | 0 |
| 760 MYL12A    | 5 | 1 | 2.239586 | 3.458912 | OK | 0 | 297.2749322 | 0.301554 | 0 |
| 761 MYO5B     | 5 | 1 | -0.29807 | 2.8949   | OK | 0 | 232.9744069 | 0.236323 | 0 |
| 762 MYO6      | 5 | 1 | -0.58755 | 4.048232 | OK | 0 | 214.7233112 | 0.217812 | 0 |
| 763 NAMPT     | 5 | 1 | -0.50679 | 3.149124 | OK | 0 | 299.2756443 | 0.303587 | 0 |
| 764 NAPRT     | 5 | 1 | 1.497659 | 3.194599 | OK | 0 | 262.3857703 | 0.266164 | 0 |
| 765 NCCRP1    | 5 | 1 | 1.198091 | 2.270749 | OK | 0 | 630.7482515 | 0.639842 | 0 |
| 766 NDRG2     | 5 | 1 | 0.029267 | 3.900654 | OK | 0 | 271.247373  | 0.275152 | 0 |
| 767 NIBAN2    | 5 | 1 | 1.78778  | 2.769645 | OK | 0 | 359.8871766 | 0.365074 | 0 |
| 768 NT5C2     | 5 | 1 | -0.06407 | 3.433455 | OK | 0 | 191.4711457 | 0.194223 | 0 |
| 769 PCBP1-AS1 | 5 | 1 | 2.084336 | 3.004049 | OK | 0 | 92.19801988 | 0.093511 | 0 |
| 770 PDCD6     | 5 | 1 | 2.024525 | 3.328223 | OK | 0 | 280.1072271 | 0.28414  | 0 |
| 771 PHACTR4   | 5 | 1 | -0.50647 | 3.799765 | OK | 0 | 159.9734864 | 0.162272 | 0 |
| 772 PHLDA1    | 5 | 1 | 0.952496 | 4.285964 | OK | 0 | 463.6616327 | 0.47033  | 0 |
| 773 PLEKHM1   | 5 | 1 | 0.317324 | 3.406489 | OK | 0 | 113.0244293 | 0.114641 | 0 |
| 774 PLIN3     | 5 | 1 | 1.379777 | 4.410369 | OK | 0 | 177.4883491 | 0.18004  | 0 |
| 775 PLSCR1    | 5 | 1 | 1.587247 | 3.427526 | OK | 0 | 141.7868003 | 0.143822 | 0 |
| 776 PORCN     | 5 | 1 | 1.56907  | 4.42071  | OK | 0 | 63.14920094 | 0.064041 | 0 |
| 777 PDPDF     | 5 | 1 | 2.374848 | 3.995792 | OK | 0 | 187.5298512 | 0.19022  | 0 |
| 778 PPP1R14B- | 5 | 1 | 1.82749  | 2.408816 | OK | 0 | 171.1926783 | 0.173651 | 0 |

|               |   |   |          |          |    |   |             |          |   |
|---------------|---|---|----------|----------|----|---|-------------|----------|---|
| 779 PRDM1     | 5 | 1 | -0.24971 | 2.779587 | OK | 0 | 346.0109725 | 0.35099  | 0 |
| 780 PRSS22    | 5 | 1 | 0.868889 | 2.496705 | OK | 0 | 284.1912347 | 0.288283 | 0 |
| 781 PRSS27    | 5 | 1 | 1.380203 | 2.34829  | OK | 0 | 644.7511215 | 0.654044 | 0 |
| 782 PRSS8     | 5 | 1 | 0.802625 | 3.794003 | OK | 0 | 116.5088726 | 0.118179 | 0 |
| 783 PSCA      | 5 | 1 | 2.35008  | 4.001967 | OK | 0 | 578.3721199 | 0.586677 | 0 |
| 784 PTK6      | 5 | 1 | 0.200677 | 3.203274 | OK | 0 | 341.5986134 | 0.346519 | 0 |
| 785 PWWP2B    | 5 | 1 | 1.057336 | 3.463561 | OK | 0 | 82.89897147 | 0.084081 | 0 |
| 786 RAB5IF    | 5 | 1 | 2.120733 | 2.949411 | OK | 0 | 356.1051098 | 0.361236 | 0 |
| 787 RAB9A     | 5 | 1 | 2.194157 | 4.534154 | OK | 0 | 166.2163694 | 0.168605 | 0 |
| 788 RANBP9    | 5 | 1 | -0.24236 | 3.762839 | OK | 0 | 202.9141436 | 0.205831 | 0 |
| 789 RFK       | 5 | 1 | 1.717212 | 4.748087 | OK | 0 | 120.8421224 | 0.122573 | 0 |
| 790 RHOF      | 5 | 1 | 1.457303 | 3.943709 | OK | 0 | 222.8249627 | 0.225977 | 0 |
| 791 RNF223    | 5 | 1 | 1.050098 | 4.393172 | OK | 0 | 340.3687653 | 0.345252 | 0 |
| 792 RNF39     | 5 | 1 | 1.393121 | 4.611402 | OK | 0 | 119.0689491 | 0.120769 | 0 |
| 793 S100P     | 5 | 1 | 0.621184 | 2.987616 | OK | 0 | 484.7854691 | 0.491768 | 0 |
| 794 SAMD9     | 5 | 1 | 0.108711 | 3.801657 | OK | 0 | 311.5740276 | 0.316063 | 0 |
| 795 SAMD9L    | 5 | 1 | 0.061001 | 3.980484 | OK | 0 | 49.42289159 | 0.050122 | 0 |
| 796 SAT1      | 5 | 1 | 1.854859 | 2.707714 | OK | 0 | 187.8987578 | 0.190599 | 0 |
| 797 SCEL      | 5 | 1 | -0.19999 | 3.733634 | OK | 0 | 581.4354464 | 0.589823 | 0 |
| 798 SCNN1A    | 5 | 1 | -0.00666 | 3.139956 | OK | 0 | 258.2221932 | 0.261939 | 0 |
| 799 SDCBP2    | 5 | 1 | 2.066228 | 3.755651 | OK | 0 | 422.0514287 | 0.428135 | 0 |
| 800 SDHA      | 5 | 1 | 1.821548 | 3.494744 | OK | 0 | 136.0052107 | 0.137957 | 0 |
| 801 SEC24C    | 5 | 1 | 0.61069  | 3.386855 | OK | 0 | 88.05993781 | 0.089317 | 0 |
| 802 SERINC2   | 5 | 1 | 1.80268  | 3.990841 | OK | 0 | 193.086298  | 0.195862 | 0 |
| 803 SERPINB13 | 5 | 1 | -0.93278 | 2.497324 | OK | 0 | 412.3513152 | 0.418295 | 0 |
| 804 SGTA      | 5 | 1 | 1.079404 | 3.86509  | OK | 0 | 71.36433426 | 0.072381 | 0 |
| 805 SH3BGRL2  | 5 | 1 | 0.390353 | 4.000653 | OK | 0 | 472.1057588 | 0.478901 | 0 |
| 806 SLC16A3   | 5 | 1 | 1.170061 | 3.080048 | OK | 0 | 192.9056967 | 0.195649 | 0 |
| 807 SLC25A23  | 5 | 1 | 0.346444 | 3.508048 | OK | 0 | 179.6251488 | 0.182207 | 0 |
| 808 SLC9A3R2  | 5 | 1 | 2.348631 | 4.31608  | OK | 0 | 84.21810082 | 0.085418 | 0 |
| 809 SLK       | 5 | 1 | -0.81044 | 3.252818 | OK | 0 | 321.1278672 | 0.325755 | 0 |
| 810 SLURP2    | 5 | 1 | 1.894557 | 2.564852 | OK | 0 | 602.1832332 | 0.610864 | 0 |
| 811 SMIM22    | 5 | 1 | 1.180317 | 2.798591 | OK | 0 | 84.16330774 | 0.085354 | 0 |
| 812 SNCG      | 5 | 1 | 2.554073 | 3.84925  | OK | 0 | 289.5755367 | 0.293724 | 0 |
| 813 SNX24     | 5 | 1 | 2.420009 | 3.822438 | OK | 0 | 207.5905829 | 0.210576 | 0 |
| 814 SNX8      | 5 | 1 | 1.358911 | 3.326992 | OK | 0 | 97.14405305 | 0.098528 | 0 |
| 815 SORBS2    | 5 | 1 | 0.783658 | 2.88426  | OK | 0 | 61.31761275 | 0.062186 | 0 |
| 816 SORT1     | 5 | 1 | -0.33217 | 2.948587 | OK | 0 | 431.0424572 | 0.437252 | 0 |
| 817 SPAG1     | 5 | 1 | 0.931965 | 3.899994 | OK | 0 | 231.9243405 | 0.235246 | 0 |
| 818 SPECC1    | 5 | 1 | 1.182206 | 4.404376 | OK | 0 | 215.8631206 | 0.218955 | 0 |
| 819 SPINT1    | 5 | 1 | 1.243959 | 3.191832 | OK | 0 | 258.9356485 | 0.262664 | 0 |
| 820 SPNS2     | 5 | 1 | 1.044174 | 4.720157 | OK | 0 | 761.2272175 | 0.772107 | 0 |
| 821 SPRR2B    | 5 | 1 | 0.264666 | 2.428786 | OK | 0 | 93.96744768 | 0.095105 | 0 |
| 822 SPSB3     | 5 | 1 | 2.275677 | 4.124184 | OK | 0 | 134.1963623 | 0.136122 | 0 |
| 823 SRGAP1    | 5 | 1 | 0.717617 | 3.138111 | OK | 0 | 162.3382386 | 0.164657 | 0 |
| 824 SRSF5     | 5 | 1 | 1.515917 | 3.191329 | OK | 0 | 263.4900155 | 0.267284 | 0 |
| 825 STK39     | 5 | 1 | -0.45692 | 2.962277 | OK | 0 | 272.3405255 | 0.27626  | 0 |
| 826 STRADB    | 5 | 1 | 1.968378 | 4.183064 | OK | 0 | 105.2190489 | 0.106721 | 0 |
| 827 SYAP1     | 5 | 1 | -0.46349 | 3.983084 | OK | 0 | 161.8119811 | 0.164137 | 0 |
| 828 TAX1BP1   | 5 | 1 | -0.75498 | 3.994061 | OK | 0 | 344.2932369 | 0.349254 | 0 |
| 829 TGFA      | 5 | 1 | 0.100981 | 3.936362 | OK | 0 | 102.6043849 | 0.104069 | 0 |
| 830 TGFB1     | 5 | 1 | 0.698172 | 2.55398  | OK | 0 | 130.7056169 | 0.132578 | 0 |
| 831 TIMP2     | 5 | 1 | 2.07942  | 4.107532 | OK | 0 | 764.7726239 | 0.775709 | 0 |
| 832 TJP1      | 5 | 1 | -0.87765 | 3.114618 | OK | 0 | 339.8626254 | 0.34476  | 0 |
| 833 TJP3      | 5 | 1 | 0.947805 | 2.869461 | OK | 0 | 221.3523421 | 0.224532 | 0 |
| 834 TMEM127   | 5 | 1 | 0.665525 | 3.56113  | OK | 0 | 103.4900656 | 0.10497  | 0 |
| 835 TMEM40    | 5 | 1 | 2.52876  | 3.960896 | OK | 0 | 485.0987622 | 0.492094 | 0 |
| 836 TMEM8A    | 5 | 1 | 1.090903 | 3.311615 | OK | 0 | 104.2874945 | 0.105775 | 0 |
| 837 TMPRSS11  | 5 | 1 | -0.06506 | 2.814024 | OK | 0 | 302.1537244 | 0.306503 | 0 |
| 838 TMPRSS11  | 5 | 1 | 0.417922 | 3.994252 | OK | 0 | 634.0384728 | 0.643171 | 0 |

|     |           |   |   |          |          |    |           |             |          |           |
|-----|-----------|---|---|----------|----------|----|-----------|-------------|----------|-----------|
| 839 | TMPRSS2   | 5 | 1 | 0.472113 | 4.025514 | OK | 0         | 389.1246995 | 0.394696 | 0         |
| 840 | TP53INP2  | 5 | 1 | 0.531974 | 3.888636 | OK | 0         | 304.4155496 | 0.308773 | 0         |
| 841 | TRIP10    | 5 | 1 | 0.530346 | 3.708187 | OK | 0         | 328.0358406 | 0.33276  | 0         |
| 842 | TSPAN6    | 5 | 1 | 1.738747 | 2.806931 | OK | 0         | 263.4586299 | 0.26725  | 0         |
| 843 | TTC22     | 5 | 1 | 0.462347 | 3.264755 | OK | 0         | 177.7604196 | 0.180313 | 0         |
| 844 | TTC9      | 5 | 1 | 0.878832 | 3.969417 | OK | 0         | 435.4616317 | 0.441737 | 0         |
| 845 | TTYH1     | 5 | 1 | 1.150912 | 3.766236 | OK | 0         | 344.0595602 | 0.34894  | 0         |
| 846 | UACA      | 5 | 1 | -0.84764 | 3.453666 | OK | 0         | 191.9155807 | 0.194675 | 0         |
| 847 | UBE2D1    | 5 | 1 | 2.084018 | 3.717723 | OK | 0         | 123.5960563 | 0.125368 | 0         |
| 848 | UBL3      | 5 | 1 | -0.26175 | 3.669374 | OK | 0         | 216.1318563 | 0.219241 | 0         |
| 849 | UPK3B     | 5 | 1 | 2.369172 | 3.07044  | OK | 0         | 434.2684569 | 0.440492 | 0         |
| 850 | VASN      | 5 | 1 | 0.761317 | 3.646885 | OK | 0         | 306.1249153 | 0.310486 | 0         |
| 851 | VSIG10    | 5 | 1 | 1.646806 | 3.884756 | OK | 0         | 101.6243571 | 0.103076 | 0         |
| 852 | VSIG10L   | 5 | 1 | 0.533208 | 3.115912 | OK | 0         | 408.1557926 | 0.414023 | 0         |
| 853 | VSIG2     | 5 | 1 | 2.261975 | 3.558542 | OK | 0         | 609.2245601 | 0.617912 | 0         |
| 854 | WDR26     | 5 | 1 | -0.37237 | 3.645668 | OK | 0         | 158.0215038 | 0.16029  | 0         |
| 855 | WDR45B    | 5 | 1 | -0.68458 | 3.321651 | OK | 0         | 179.6375217 | 0.18222  | 0         |
| 856 | YPEL3     | 5 | 1 | 2.103713 | 4.032508 | OK | 0         | 169.9387242 | 0.172381 | 0         |
| 857 | ZFAND2A   | 5 | 1 | 2.303498 | 4.45271  | OK | 7.89E-303 | 37.17746599 | 0.037701 | 8.00E-303 |
| 858 | ZFAND5    | 5 | 1 | 0.997223 | 4.390746 | OK | 0         | 220.1789921 | 0.223347 | 0         |
| 859 | ZNF101    | 5 | 1 | 2.071027 | 4.206877 | OK | 0         | 91.93897505 | 0.093244 | 0         |
| 860 | ZNF185    | 5 | 1 | -0.11033 | 3.275476 | OK | 0         | 389.9671791 | 0.395588 | 0         |
| 861 | ZNRF1     | 5 | 1 | 2.361413 | 4.01704  | OK | 0         | 218.7315085 | 0.221879 | 0         |
| 862 | AC023157. | 6 | 1 | 0.654477 | 5.484818 | OK | 0         | 104.1856252 | 0.105675 | 0         |
| 863 | ACOX1     | 6 | 1 | -0.45764 | 4.56818  | OK | 0         | 217.4989344 | 0.220627 | 0         |
| 864 | ADIPOR2   | 6 | 1 | 0.631732 | 4.765007 | OK | 0         | 179.564683  | 0.182145 | 0         |
| 865 | AMOTL2    | 6 | 1 | -0.26919 | 4.415826 | OK | 0         | 69.07158248 | 0.070055 | 0         |
| 866 | ANKRD13A  | 6 | 1 | -0.16876 | 4.462662 | OK | 0         | 113.9198441 | 0.115552 | 0         |
| 867 | ANKRD37   | 6 | 1 | 0.94784  | 5.604868 | OK | 0         | 167.7151696 | 0.170125 | 0         |
| 868 | ARHGAP10  | 6 | 1 | 0.234525 | 4.402782 | OK | 0         | 207.7814854 | 0.210769 | 0         |
| 869 | ARL4C     | 6 | 1 | 0.452183 | 4.74883  | OK | 0         | 180.6920978 | 0.183289 | 0         |
| 870 | ASCC2     | 6 | 1 | 0.639094 | 5.42503  | OK | 0         | 123.0272127 | 0.124791 | 0         |
| 871 | ATG9B     | 6 | 1 | 0.574758 | 4.585546 | OK | 0         | 537.9230503 | 0.545572 | 0         |
| 872 | BPGM      | 6 | 1 | 0.162323 | 5.505266 | OK | 0         | 48.0966126  | 0.048777 | 0         |
| 873 | C18orf25  | 6 | 1 | 0.468652 | 5.148888 | OK | 0         | 201.5397077 | 0.204433 | 0         |
| 874 | CDKL5     | 6 | 1 | -0.20618 | 4.554295 | OK | 0         | 91.96738186 | 0.093275 | 0         |
| 875 | CFLAR     | 6 | 1 | 0.583019 | 5.199415 | OK | 0         | 142.281627  | 0.144324 | 0         |
| 876 | CGNL1     | 6 | 1 | 0.820019 | 4.883241 | OK | 0         | 545.4976824 | 0.553242 | 0         |
| 877 | CHAC1     | 6 | 1 | -0.01431 | 5.09707  | OK | 0         | 280.486403  | 0.284308 | 0         |
| 878 | CITED2    | 6 | 1 | 0.685853 | 5.244548 | OK | 0         | 129.654138  | 0.131514 | 0         |
| 879 | CNST      | 6 | 1 | 0.580458 | 5.115193 | OK | 0         | 117.2043621 | 0.118879 | 0         |
| 880 | CSNK1E    | 6 | 1 | 0.114267 | 4.935921 | OK | 0         | 129.6477081 | 0.131506 | 0         |
| 881 | DKK1      | 6 | 1 | 0.65997  | 5.518457 | OK | 0         | 336.7215333 | 0.341411 | 0         |
| 882 | DUSP14    | 6 | 1 | 0.223446 | 5.654048 | OK | 0         | 102.7899874 | 0.104261 | 0         |
| 883 | DUSP5     | 6 | 1 | 0.543382 | 5.326819 | OK | 0         | 331.9651945 | 0.336738 | 0         |
| 884 | ERO1A     | 6 | 1 | 0.795767 | 4.57673  | OK | 0         | 347.3011844 | 0.352302 | 0         |
| 885 | FAM214A   | 6 | 1 | 0.253163 | 4.863839 | OK | 0         | 191.4079091 | 0.194155 | 0         |
| 886 | FLG       | 6 | 1 | 0.21221  | 5.657109 | OK | 0         | 325.6668067 | 0.330273 | 0         |
| 887 | GNE       | 6 | 1 | -0.18452 | 4.501211 | OK | 0         | 98.67681552 | 0.100075 | 0         |
| 888 | GPAT3     | 6 | 1 | -0.10053 | 4.944178 | OK | 0         | 312.9460905 | 0.317343 | 0         |
| 889 | GRPEL2    | 6 | 1 | 0.849469 | 5.273012 | OK | 0         | 311.9734578 | 0.316444 | 0         |
| 890 | HCG22     | 6 | 1 | 0.667227 | 5.208042 | OK | 0         | 389.00955   | 0.394543 | 0         |
| 891 | HILPDA    | 6 | 1 | 0.87843  | 5.501628 | OK | 0         | 250.1113345 | 0.253702 | 0         |
| 892 | IL1RN     | 6 | 1 | 0.58372  | 5.044149 | OK | 0         | 450.6357138 | 0.457133 | 0         |
| 893 | ITGB8     | 6 | 1 | -0.11459 | 4.204758 | OK | 0         | 136.1836871 | 0.138138 | 0         |
| 894 | KPRP      | 6 | 1 | 0.71485  | 5.559824 | OK | 0         | 276.705257  | 0.280506 | 0         |
| 895 | KRT16     | 6 | 1 | -0.2535  | 5.099516 | OK | 0         | 250.291273  | 0.253895 | 0         |
| 896 | KRTAP3-2  | 6 | 1 | 1.176404 | 6.71268  | OK | 0         | 183.2759151 | 0.185607 | 0         |
| 897 | LNK1      | 6 | 1 | 0.6567   | 4.788741 | OK | 0         | 185.9705633 | 0.188637 | 0         |
| 898 | LPIN1     | 6 | 1 | 0.49636  | 4.964568 | OK | 0         | 466.4110305 | 0.473084 | 0         |

|     |           |   |   |          |          |    |   |             |          |   |
|-----|-----------|---|---|----------|----------|----|---|-------------|----------|---|
| 899 | MACO1     | 6 | 1 | 0.359179 | 4.90566  | OK | 0 | 114.9008094 | 0.116547 | 0 |
| 900 | MCU       | 6 | 1 | 0.35528  | 4.623194 | OK | 0 | 116.4249278 | 0.118089 | 0 |
| 901 | MT1A      | 6 | 1 | 1.203329 | 6.768424 | OK | 0 | 76.09390949 | 0.07693  | 0 |
| 902 | MT1E      | 6 | 1 | 1.213834 | 6.769074 | OK | 0 | 390.9570623 | 0.396593 | 0 |
| 903 | MT1F      | 6 | 1 | 1.210291 | 6.774556 | OK | 0 | 72.21828667 | 0.07324  | 0 |
| 904 | MT1G      | 6 | 1 | 1.228783 | 6.795896 | OK | 0 | 285.1050767 | 0.2892   | 0 |
| 905 | MT1H      | 6 | 1 | 1.194084 | 6.752085 | OK | 0 | 279.0143532 | 0.282987 | 0 |
| 906 | MT1M      | 6 | 1 | 1.237857 | 6.802794 | OK | 0 | 161.0983657 | 0.16339  | 0 |
| 907 | MT2A      | 6 | 1 | 1.250069 | 6.821646 | OK | 0 | 466.5079858 | 0.473235 | 0 |
| 908 | MYZAP     | 6 | 1 | 0.263878 | 4.836772 | OK | 0 | 320.8284676 | 0.32542  | 0 |
| 909 | NABP1     | 6 | 1 | 0.434566 | 5.238608 | OK | 0 | 127.0786783 | 0.1289   | 0 |
| 910 | NEDD4L    | 6 | 1 | -0.07737 | 4.443242 | OK | 0 | 82.95396745 | 0.084137 | 0 |
| 911 | NR1D1     | 6 | 1 | 1.081408 | 6.453282 | OK | 0 | 96.46358663 | 0.097841 | 0 |
| 912 | OXSRI     | 6 | 1 | -0.25546 | 4.587452 | OK | 0 | 137.6766898 | 0.139652 | 0 |
| 913 | PADI1     | 6 | 1 | 0.139826 | 4.762465 | OK | 0 | 435.3303383 | 0.441577 | 0 |
| 914 | PARD6B    | 6 | 1 | -0.1064  | 4.56817  | OK | 0 | 138.7384022 | 0.140726 | 0 |
| 915 | PDP1      | 6 | 1 | -0.10933 | 4.360188 | OK | 0 | 65.35033446 | 0.06628  | 0 |
| 916 | PDZD2     | 6 | 1 | -0.12244 | 4.343046 | OK | 0 | 78.1201569  | 0.079233 | 0 |
| 917 | PELI1     | 6 | 1 | -0.10783 | 4.880102 | OK | 0 | 150.4246262 | 0.152583 | 0 |
| 918 | PHACTR2   | 6 | 1 | -0.07845 | 4.995728 | OK | 0 | 203.3841078 | 0.206309 | 0 |
| 919 | PPL       | 6 | 1 | -0.50209 | 4.450413 | OK | 0 | 426.5544047 | 0.432704 | 0 |
| 920 | PTPN3     | 6 | 1 | -0.28792 | 4.71844  | OK | 0 | 81.25068811 | 0.08241  | 0 |
| 921 | QSOX1     | 6 | 1 | 0.291849 | 5.440802 | OK | 0 | 294.215965  | 0.298448 | 0 |
| 922 | RASGEF1B  | 6 | 1 | 0.600836 | 5.473722 | OK | 0 | 135.6035204 | 0.137539 | 0 |
| 923 | RIOK3     | 6 | 1 | -0.62499 | 4.121132 | OK | 0 | 330.2011143 | 0.334958 | 0 |
| 924 | RMND5A    | 6 | 1 | 0.270898 | 4.99914  | OK | 0 | 151.8914784 | 0.154072 | 0 |
| 925 | RNASE7    | 6 | 1 | 0.201578 | 5.575142 | OK | 0 | 602.393195  | 0.610916 | 0 |
| 926 | RNF169    | 6 | 1 | 0.384669 | 4.670601 | OK | 0 | 131.59774   | 0.133485 | 0 |
| 927 | SASH1     | 6 | 1 | -0.40658 | 4.257826 | OK | 0 | 231.7463291 | 0.235081 | 0 |
| 928 | SEC14L1   | 6 | 1 | 0.381333 | 4.559777 | OK | 0 | 122.4094454 | 0.124162 | 0 |
| 929 | SECISBP2L | 6 | 1 | -0.36416 | 4.571112 | OK | 0 | 174.6378579 | 0.177145 | 0 |
| 930 | SESN2     | 6 | 1 | 0.709718 | 5.434245 | OK | 0 | 176.021871  | 0.178534 | 0 |
| 931 | SH3D19    | 6 | 1 | -0.3114  | 4.144282 | OK | 0 | 99.98079513 | 0.101411 | 0 |
| 932 | SLC20A2   | 6 | 1 | -0.28897 | 4.951072 | OK | 0 | 112.7618792 | 0.114377 | 0 |
| 933 | SNX9      | 6 | 1 | 0.589619 | 5.014684 | OK | 0 | 213.368937  | 0.216437 | 0 |
| 934 | SYNPO2L   | 6 | 1 | 0.628094 | 5.540041 | OK | 0 | 228.9929963 | 0.232066 | 0 |
| 935 | TCP11L2   | 6 | 1 | 0.793559 | 4.927032 | OK | 0 | 275.0539928 | 0.279    | 0 |
| 936 | TEAD1     | 6 | 1 | -0.36468 | 4.406013 | OK | 0 | 137.5743625 | 0.139547 | 0 |
| 937 | TICAM1    | 6 | 1 | 0.624626 | 4.888031 | OK | 0 | 157.9724732 | 0.160237 | 0 |
| 938 | TMOD3     | 6 | 1 | -0.64278 | 4.180426 | OK | 0 | 357.3484758 | 0.362498 | 0 |
| 939 | TNIP1     | 6 | 1 | -0.39878 | 4.572251 | OK | 0 | 186.0050496 | 0.188679 | 0 |
| 940 | TP53BP2   | 6 | 1 | 0.026254 | 4.778004 | OK | 0 | 106.268608  | 0.107789 | 0 |
| 941 | TRIM2     | 6 | 1 | 0.020364 | 4.50175  | OK | 0 | 176.6294491 | 0.179154 | 0 |
| 942 | TUFT1     | 6 | 1 | -0.25342 | 4.955034 | OK | 0 | 107.4780284 | 0.109016 | 0 |
| 943 | UBE2G1    | 6 | 1 | 0.755913 | 4.739602 | OK | 0 | 158.3813099 | 0.160656 | 0 |
| 944 | UPP1      | 6 | 1 | 0.987655 | 5.478302 | OK | 0 | 276.4968601 | 0.280478 | 0 |
| 945 | USP53     | 6 | 1 | -0.2943  | 4.19818  | OK | 0 | 110.5725745 | 0.112156 | 0 |
| 946 | USP6NL    | 6 | 1 | -0.14036 | 4.18733  | OK | 0 | 222.892655  | 0.226096 | 0 |
| 947 | VPS37B    | 6 | 1 | -0.27223 | 4.80607  | OK | 0 | 195.324401  | 0.198132 | 0 |
| 948 | WWC1      | 6 | 1 | -0.35907 | 4.546819 | OK | 0 | 144.8576233 | 0.146932 | 0 |
| 949 | YOD1      | 6 | 1 | 0.466948 | 5.4359   | OK | 0 | 269.6401227 | 0.27351  | 0 |
| 950 | ZNF365    | 6 | 1 | 0.819224 | 5.448735 | OK | 0 | 540.6312193 | 0.548272 | 0 |
| 951 | ZNF426    | 6 | 1 | 0.16132  | 5.103724 | OK | 0 | 153.103905  | 0.155296 | 0 |
| 952 | ZNF430    | 6 | 1 | 0.226499 | 5.644871 | OK | 0 | 64.31879868 | 0.065234 | 0 |
| 953 | ZNF431    | 6 | 1 | 0.287737 | 5.576567 | OK | 0 | 177.384566  | 0.179932 | 0 |
| 954 | ZNF714    | 6 | 1 | 0.213168 | 5.632364 | OK | 0 | 66.0553414  | 0.066993 | 0 |
| 955 | ZNF92     | 6 | 1 | 0.212482 | 5.639435 | OK | 0 | 78.66965378 | 0.079788 | 0 |
| 956 | ALOX15    | 7 | 1 | -0.32891 | -0.23817 | OK | 0 | 434.6651069 | 0.44093  | 0 |
| 957 | ANO1      | 7 | 1 | -0.14253 | -0.50269 | OK | 0 | 320.4936555 | 0.325111 | 0 |
| 958 | APOL1     | 7 | 1 | -0.09545 | -1.11637 | OK | 0 | 136.483189  | 0.13844  | 0 |

|                |   |   |          |          |    |   |             |          |   |
|----------------|---|---|----------|----------|----|---|-------------|----------|---|
| 959 ARNTL2     | 7 | 1 | -0.19849 | -0.43845 | OK | 0 | 264.2569026 | 0.268061 | 0 |
| 960 ATP13A5    | 7 | 1 | -0.51693 | -0.85023 | OK | 0 | 130.64077   | 0.132511 | 0 |
| 961 ATP8B1     | 7 | 1 | 0.089923 | -0.57546 | OK | 0 | 230.211679  | 0.233524 | 0 |
| 962 BCL2L15    | 7 | 1 | -0.49916 | -0.51159 | OK | 0 | 219.2263121 | 0.222379 | 0 |
| 963 C12orf75   | 7 | 1 | -0.56691 | -1.34929 | OK | 0 | 160.5192575 | 0.162825 | 0 |
| 964 CA2        | 7 | 1 | -0.10917 | -1.40183 | OK | 0 | 236.2899464 | 0.239691 | 0 |
| 965 CADM1      | 7 | 1 | -0.27633 | -0.56155 | OK | 0 | 118.3391683 | 0.120033 | 0 |
| 966 CAMK1D     | 7 | 1 | -0.07629 | -0.47949 | OK | 0 | 217.4202527 | 0.220547 | 0 |
| 967 CCL26      | 7 | 1 | -0.31755 | -0.54385 | OK | 0 | 302.0231403 | 0.306374 | 0 |
| 968 CDH3       | 7 | 1 | -0.30856 | -1.40471 | OK | 0 | 180.9037785 | 0.183503 | 0 |
| 969 CES2       | 7 | 1 | 0.44769  | -0.48062 | OK | 0 | 470.9342532 | 0.477725 | 0 |
| 970 CHL1       | 7 | 1 | -0.38052 | -0.41476 | OK | 0 | 237.1249703 | 0.240535 | 0 |
| 971 CISH       | 7 | 1 | -0.40716 | -1.21551 | OK | 0 | 69.58338323 | 0.070575 | 0 |
| 972 CLDN1      | 7 | 1 | 0.034547 | -0.95149 | OK | 0 | 201.4444818 | 0.204342 | 0 |
| 973 CTSC       | 7 | 1 | -0.54689 | -1.06939 | OK | 0 | 293.4937114 | 0.297721 | 0 |
| 974 CYP2S1     | 7 | 1 | -0.07855 | -0.88485 | OK | 0 | 150.6675981 | 0.152829 | 0 |
| 975 CYP7B1     | 7 | 1 | -0.4931  | -0.6963  | OK | 0 | 294.3818033 | 0.298622 | 0 |
| 976 DPYD       | 7 | 1 | -0.29173 | -0.409   | OK | 0 | 253.6263682 | 0.257277 | 0 |
| 977 DSG3       | 7 | 1 | 0.633453 | -0.60171 | OK | 0 | 372.6045303 | 0.377972 | 0 |
| 978 DSP        | 7 | 1 | 0.566945 | -0.72709 | OK | 0 | 236.2433509 | 0.239636 | 0 |
| 979 DUOX1      | 7 | 1 | 0.201838 | -0.24161 | OK | 0 | 326.2683787 | 0.330969 | 0 |
| 980 EPPK1      | 7 | 1 | -0.34352 | -0.37426 | OK | 0 | 266.1956611 | 0.270024 | 0 |
| 981 GALNT5     | 7 | 1 | -0.06889 | -0.77017 | OK | 0 | 214.1991008 | 0.21728  | 0 |
| 982 HAS3       | 7 | 1 | -0.10233 | -0.90178 | OK | 0 | 143.95017   | 0.146014 | 0 |
| 983 HLF        | 7 | 1 | -0.34972 | -1.28568 | OK | 0 | 174.4748259 | 0.176982 | 0 |
| 984 HPGD       | 7 | 1 | -0.61451 | -0.86886 | OK | 0 | 354.9179683 | 0.360032 | 0 |
| 985 KCNJ2      | 7 | 1 | -0.45649 | -1.24272 | OK | 0 | 130.4389326 | 0.13231  | 0 |
| 986 LINC01497  | 7 | 1 | -0.58644 | -1.01596 | OK | 0 | 193.505593  | 0.196287 | 0 |
| 987 LTA4H      | 7 | 1 | 0.05077  | -0.24902 | OK | 0 | 348.1073431 | 0.353124 | 0 |
| 988 MDK        | 7 | 1 | -0.54927 | -1.18398 | OK | 0 | 188.5971158 | 0.191309 | 0 |
| 989 MPP7       | 7 | 1 | 0.16097  | -0.52633 | OK | 0 | 364.668985  | 0.369925 | 0 |
| 990 MX1        | 7 | 1 | 0.046814 | -0.70669 | OK | 0 | 268.5388615 | 0.272406 | 0 |
| 991 MYH9       | 7 | 1 | 0.247705 | -0.85357 | OK | 0 | 257.7729451 | 0.261484 | 0 |
| 992 NEFL       | 7 | 1 | -0.29065 | -0.31323 | OK | 0 | 177.4029801 | 0.179948 | 0 |
| 993 NTRK2      | 7 | 1 | -0.44555 | -1.27409 | OK | 0 | 213.3491183 | 0.216419 | 0 |
| 994 P2RY1      | 7 | 1 | 0.238221 | -0.6107  | OK | 0 | 239.3458131 | 0.242791 | 0 |
| 995 PDZK1IP1   | 7 | 1 | -0.33246 | 0.007324 | OK | 0 | 292.720704  | 0.296937 | 0 |
| 996 PHLDB2     | 7 | 1 | -0.07042 | -1.44813 | OK | 0 | 99.34597926 | 0.100766 | 0 |
| 997 PMCH       | 7 | 1 | -0.59368 | -0.71376 | OK | 0 | 68.39893734 | 0.069363 | 0 |
| 998 SAMHD1     | 7 | 1 | -0.54264 | -0.71986 | OK | 0 | 227.8986842 | 0.231177 | 0 |
| 999 SCIN       | 7 | 1 | -0.49259 | -0.70821 | OK | 0 | 469.4131307 | 0.476182 | 0 |
| 1000 SECTM1    | 7 | 1 | -0.24964 | -0.44844 | OK | 0 | 136.333547  | 0.138287 | 0 |
| 1001 SERPINB3  | 7 | 1 | -0.68084 | -0.75916 | OK | 0 | 480.0374551 | 0.486956 | 0 |
| 1002 SERPINB4  | 7 | 1 | -0.6339  | -0.65821 | OK | 0 | 367.927037  | 0.37323  | 0 |
| 1003 SERPINE2  | 7 | 1 | -0.59254 | -0.91515 | OK | 0 | 174.5971759 | 0.177105 | 0 |
| 1004 SFRP1     | 7 | 1 | -0.55747 | -1.05463 | OK | 0 | 216.6401506 | 0.219756 | 0 |
| 1005 SGK1      | 7 | 1 | -0.50208 | -1.14599 | OK | 0 | 252.2459678 | 0.255878 | 0 |
| 1006 SH3RF2    | 7 | 1 | -0.07761 | -0.70377 | OK | 0 | 244.2873354 | 0.247804 | 0 |
| 1007 SLC26A4-A | 7 | 1 | -0.39774 | -0.35791 | OK | 0 | 218.6808982 | 0.221818 | 0 |
| 1008 SPARCL1   | 7 | 1 | -0.47782 | -1.06132 | OK | 0 | 78.91544755 | 0.080039 | 0 |
| 1009 SPTBN1    | 7 | 1 | 0.286668 | -0.71725 | OK | 0 | 247.5870723 | 0.251151 | 0 |
| 1010 SYNPO     | 7 | 1 | -0.29803 | -1.18115 | OK | 0 | 122.6287639 | 0.124385 | 0 |
| 1011 TFPI      | 7 | 1 | -0.34551 | -1.25913 | OK | 0 | 66.9720114  | 0.067924 | 0 |
| 1012 TFRC      | 7 | 1 | 0.40516  | -0.7634  | OK | 0 | 175.4500203 | 0.177971 | 0 |
| 1013 THBD      | 7 | 1 | 0.039195 | -1.08419 | OK | 0 | 199.7149552 | 0.202586 | 0 |
| 1014 TMPRSS11  | 7 | 1 | 0.105847 | -0.24942 | OK | 0 | 361.7085279 | 0.366921 | 0 |
| 1015 TNFAIP6   | 7 | 1 | -0.58827 | -0.73305 | OK | 0 | 208.3303277 | 0.211322 | 0 |
| 1016 ZFP36L1   | 7 | 1 | 0.786903 | -0.87909 | OK | 0 | 378.064425  | 0.38351  | 0 |



**Supplemental Table 4.** Gene expression profile of module 7 genes in EoE vs healthy subjects.

| gene        | meanEoE  | meanHC   | log2FC   | status | p_value | morans_test_statistic | morans_l | q_value |
|-------------|----------|----------|----------|--------|---------|-----------------------|----------|---------|
| 1 TNFAIP6   | 0.966075 | 3.85E-05 | 14.61634 | OK     | 0       | 208.3303277           | 0.211322 | 0       |
| 2 ALOX15    | 1.961654 | 0.000725 | 11.4022  | OK     | 0       | 434.6651069           | 0.44093  | 0       |
| 3 PMCH      | 0.202487 | 0.000257 | 9.619501 | OK     | 0       | 68.39893734           | 0.069363 | 0       |
| 4 CCL26     | 6.859651 | 0.016739 | 8.67874  | OK     | 0       | 302.0231403           | 0.306374 | 0       |
| 5 SLC26A4-A | 0.120048 | 0.000587 | 7.676937 | OK     | 0       | 218.6808982           | 0.221818 | 0       |
| 6 ATP13A5   | 0.157916 | 0.001202 | 7.03789  | OK     | 0       | 130.64077             | 0.132511 | 0       |
| 7 ANO1      | 0.836764 | 0.025489 | 5.036852 | OK     | 0       | 320.4936555           | 0.325111 | 0       |
| 8 LINC01497 | 0.661007 | 0.028314 | 4.545071 | OK     | 0       | 193.505593            | 0.196287 | 0       |
| 9 EPPK1     | 0.265399 | 0.015432 | 4.104191 | OK     | 0       | 266.1956611           | 0.270024 | 0       |
| 10 CA2      | 1.371843 | 0.080025 | 4.099519 | OK     | 0       | 236.2899464           | 0.239691 | 0       |
| 11 SERPINB4 | 6.673203 | 0.427246 | 3.965242 | OK     | 0       | 367.927037            | 0.37323  | 0       |
| 12 NEFL     | 0.280174 | 0.018846 | 3.894011 | OK     | 0       | 177.4029801           | 0.179948 | 0       |
| 13 SYNPO    | 0.235893 | 0.016821 | 3.809789 | OK     | 0       | 122.6287639           | 0.124385 | 0       |
| 14 SCIN     | 3.688674 | 0.275633 | 3.742284 | OK     | 0       | 469.4131307           | 0.476182 | 0       |
| 15 BCL2L15  | 0.386922 | 0.030523 | 3.664075 | OK     | 0       | 219.2263121           | 0.222379 | 0       |
| 16 SFRP1    | 0.617312 | 0.057587 | 3.422193 | OK     | 0       | 216.6401506           | 0.219756 | 0       |
| 17 CTSC     | 3.435824 | 0.360298 | 3.253396 | OK     | 0       | 293.4937114           | 0.297721 | 0       |
| 18 CYP7B1   | 0.957797 | 0.11481  | 3.060474 | OK     | 0       | 294.3818033           | 0.298622 | 0       |
| 19 KCNJ2    | 0.580258 | 0.073126 | 2.988245 | OK     | 0       | 130.4389326           | 0.13231  | 0       |
| 20 SGK1     | 2.223951 | 0.3163   | 2.813758 | OK     | 0       | 252.2459678           | 0.255878 | 0       |
| 21 MDK      | 0.882212 | 0.130983 | 2.751741 | OK     | 0       | 188.5971158           | 0.191309 | 0       |
| 22 NTRK2    | 0.948013 | 0.143536 | 2.723496 | OK     | 0       | 213.3491183           | 0.216419 | 0       |
| 23 CISH     | 0.225675 | 0.035959 | 2.649824 | OK     | 0       | 69.58338323           | 0.070575 | 0       |
| 24 CADM1    | 0.144856 | 0.024142 | 2.584993 | OK     | 0       | 118.3391683           | 0.120033 | 0       |
| 25 HAS3     | 0.200476 | 0.034917 | 2.52142  | OK     | 0       | 143.95017             | 0.146014 | 0       |
| 26 SECTM1   | 0.169999 | 0.031297 | 2.441448 | OK     | 0       | 136.333547            | 0.138287 | 0       |
| 27 PHLDB2   | 0.153398 | 0.029796 | 2.36408  | OK     | 0       | 99.34597926           | 0.100766 | 0       |
| 28 APOL1    | 0.285596 | 0.056621 | 2.33457  | OK     | 0       | 136.483189            | 0.13844  | 0       |
| 29 CHL1     | 0.33855  | 0.071509 | 2.243166 | OK     | 0       | 237.1249703           | 0.240535 | 0       |
| 30 DPYD     | 0.493135 | 0.106768 | 2.2075   | OK     | 0       | 253.6263682           | 0.257277 | 0       |
| 31 DUOX1    | 1.171431 | 0.253832 | 2.206326 | OK     | 0       | 326.2683787           | 0.330969 | 0       |
| 32 PDZK1IP1 | 3.354051 | 0.747063 | 2.166603 | OK     | 0       | 292.720704            | 0.296937 | 0       |
| 33 CAMK1D   | 0.299013 | 0.067236 | 2.152896 | OK     | 0       | 217.4202527           | 0.220547 | 0       |
| 34 SH3RF2   | 0.653009 | 0.161891 | 2.01208  | OK     | 0       | 244.2873354           | 0.247804 | 0       |
| 35 C12orf75 | 0.453379 | 0.11281  | 2.006827 | OK     | 0       | 160.5192575           | 0.162825 | 0       |
| 36 GALNT5   | 0.476173 | 0.130597 | 1.866365 | OK     | 0       | 214.1991008           | 0.21728  | 0       |
| 37 SAMHD1   | 0.34603  | 0.096709 | 1.839171 | OK     | 0       | 227.8986842           | 0.231177 | 0       |
| 38 LTA4H    | 1.99693  | 0.570936 | 1.806382 | OK     | 0       | 348.1073431           | 0.353124 | 0       |
| 39 MPP7     | 1.046935 | 0.307843 | 1.765906 | OK     | 0       | 364.668985            | 0.369925 | 0       |
| 40 SERPINB3 | 17.48953 | 5.324917 | 1.715661 | OK     | 0       | 480.0374551           | 0.486956 | 0       |
| 41 SERPINE2 | 0.356731 | 0.108897 | 1.711879 | OK     | 0       | 174.5971759           | 0.177105 | 0       |
| 42 MX1      | 0.797846 | 0.246848 | 1.692489 | OK     | 0       | 268.5388615           | 0.272406 | 0       |
| 43 MYH9     | 1.216838 | 0.379624 | 1.680495 | OK     | 0       | 257.7729451           | 0.261484 | 0       |
| 44 ATP8B1   | 0.488133 | 0.158052 | 1.626876 | OK     | 0       | 230.211679            | 0.233524 | 0       |
| 45 P2RY1    | 0.65632  | 0.213077 | 1.623026 | OK     | 0       | 239.3458131           | 0.242791 | 0       |
| 46 SPTBN1   | 0.839629 | 0.273835 | 1.616447 | OK     | 0       | 247.5870723           | 0.251151 | 0       |
| 47 CDH3     | 0.359101 | 0.118118 | 1.604159 | OK     | 0       | 180.9037785           | 0.183503 | 0       |
| 48 THBD     | 0.404966 | 0.134632 | 1.588778 | OK     | 0       | 199.7149552           | 0.202586 | 0       |
| 49 HPGD     | 3.934351 | 1.313569 | 1.582633 | OK     | 0       | 354.9179683           | 0.360032 | 0       |
| 50 TFPI     | 0.120224 | 0.041968 | 1.518378 | OK     | 0       | 66.9720114            | 0.067924 | 0       |
| 51 HLF      | 0.498671 | 0.178091 | 1.48547  | OK     | 0       | 174.4748259           | 0.176982 | 0       |

|              |          |          |          |    |   |             |          |   |
|--------------|----------|----------|----------|----|---|-------------|----------|---|
| 52 CLDN1     | 0.710254 | 0.256736 | 1.468051 | OK | 0 | 201.4444818 | 0.204342 | 0 |
| 53 SPARCL1   | 0.139903 | 0.054756 | 1.353335 | OK | 0 | 78.91544755 | 0.080039 | 0 |
| 54 CYP2S1    | 0.247008 | 0.099059 | 1.318203 | OK | 0 | 150.6675981 | 0.152829 | 0 |
| 55 TMPRSS11L | 0.897483 | 0.377531 | 1.249291 | OK | 0 | 361.7085279 | 0.366921 | 0 |
| 56 CES2      | 2.138067 | 0.953795 | 1.164556 | OK | 0 | 470.9342532 | 0.477725 | 0 |
| 57 DSG3      | 4.166981 | 1.902058 | 1.131441 | OK | 0 | 372.6045303 | 0.377972 | 0 |
| 58 ARNTL2    | 0.553917 | 0.277875 | 0.995237 | OK | 0 | 264.2569026 | 0.268061 | 0 |
| 59 DSP       | 15.03454 | 7.578231 | 0.988348 | OK | 0 | 236.2433509 | 0.239636 | 0 |
| 60 TFRC      | 0.392033 | 0.209336 | 0.905155 | OK | 0 | 175.4500203 | 0.177971 | 0 |
| 61 ZFP36L1   | 5.059103 | 2.971625 | 0.76763  | OK | 0 | 378.064425  | 0.38351  | 0 |

**Supplemental Table 5.** Identification of SOX2 and/or KLF5 downstream targets from Enrichr databases and literature-based analyses.

| gene       | source                                                | regulator |
|------------|-------------------------------------------------------|-----------|
| 1 CACNA2D4 | Enrichr CHEA_2022: SOX2 20726797 ChIP-Seq SW620 Human | SOX2      |
| 2 KIAA1586 | Enrichr CHEA_2022: SOX2 20726797 ChIP-Seq SW620 Human | SOX2      |
| 3 ISL1     | Enrichr CHEA_2022: SOX2 20726797 ChIP-Seq SW620 Human | SOX2      |
| 4 LARP6    | Enrichr CHEA_2022: SOX2 20726797 ChIP-Seq SW620 Human | SOX2      |
| 5 L1CAM    | Enrichr CHEA_2022: SOX2 20726797 ChIP-Seq SW620 Human | SOX2      |
| 6 SPINT2   | Enrichr CHEA_2022: SOX2 20726797 ChIP-Seq SW620 Human | SOX2      |
| 7 ASPHD1   | Enrichr CHEA_2022: SOX2 20726797 ChIP-Seq SW620 Human | SOX2      |
| 8 SPINT1   | Enrichr CHEA_2022: SOX2 20726797 ChIP-Seq SW620 Human | SOX2      |
| 9 FEZ2     | Enrichr CHEA_2022: SOX2 20726797 ChIP-Seq SW620 Human | SOX2      |
| 10 SCO1    | Enrichr CHEA_2022: SOX2 20726797 ChIP-Seq SW620 Human | SOX2      |
| 11 ATF3    | Enrichr CHEA_2022: SOX2 20726797 ChIP-Seq SW620 Human | SOX2      |
| 12 SAMD9   | Enrichr CHEA_2022: SOX2 20726797 ChIP-Seq SW620 Human | SOX2      |
| 13 HPGD    | Enrichr CHEA_2022: SOX2 20726797 ChIP-Seq SW620 Human | SOX2      |
| 14 PON3    | Enrichr CHEA_2022: SOX2 20726797 ChIP-Seq SW620 Human | SOX2      |
| 15 CRABP2  | Enrichr CHEA_2022: SOX2 20726797 ChIP-Seq SW620 Human | SOX2      |
| 16 TFPI    | Enrichr CHEA_2022: SOX2 20726797 ChIP-Seq SW620 Human | SOX2      |
| 17 UACA    | Enrichr CHEA_2022: SOX2 20726797 ChIP-Seq SW620 Human | SOX2      |
| 18 SPDEF   | Enrichr CHEA_2022: SOX2 20726797 ChIP-Seq SW620 Human | SOX2      |
| 19 TFPT    | Enrichr CHEA_2022: SOX2 20726797 ChIP-Seq SW620 Human | SOX2      |
| 20 DPYSL3  | Enrichr CHEA_2022: SOX2 20726797 ChIP-Seq SW620 Human | SOX2      |
| 21 ZNF19   | Enrichr CHEA_2022: SOX2 20726797 ChIP-Seq SW620 Human | SOX2      |
| 22 JAG1    | Enrichr CHEA_2022: SOX2 20726797 ChIP-Seq SW620 Human | SOX2      |
| 23 NEBL    | Enrichr CHEA_2022: SOX2 20726797 ChIP-Seq SW620 Human | SOX2      |
| 24 ATP6AP2 | Enrichr CHEA_2022: SOX2 20726797 ChIP-Seq SW620 Human | SOX2      |
| 25 ATP6AP1 | Enrichr CHEA_2022: SOX2 20726797 ChIP-Seq SW620 Human | SOX2      |
| 26 NR2F2   | Enrichr CHEA_2022: SOX2 20726797 ChIP-Seq SW620 Human | SOX2      |
| 27 PBX3    | Enrichr CHEA_2022: SOX2 20726797 ChIP-Seq SW620 Human | SOX2      |
| 28 VPS13A  | Enrichr CHEA_2022: SOX2 20726797 ChIP-Seq SW620 Human | SOX2      |
| 29 SUPV3L1 | Enrichr CHEA_2022: SOX2 20726797 ChIP-Seq SW620 Human | SOX2      |
| 30 VANGL1  | Enrichr CHEA_2022: SOX2 20726797 ChIP-Seq SW620 Human | SOX2      |
| 31 BCR     | Enrichr CHEA_2022: SOX2 20726797 ChIP-Seq SW620 Human | SOX2      |
| 32 PHF20L1 | Enrichr CHEA_2022: SOX2 20726797 ChIP-Seq SW620 Human | SOX2      |
| 33 PPFIBP2 | Enrichr CHEA_2022: SOX2 20726797 ChIP-Seq SW620 Human | SOX2      |
| 34 FAM111A | Enrichr CHEA_2022: SOX2 20726797 ChIP-Seq SW620 Human | SOX2      |
| 35 PLSCR1  | Enrichr CHEA_2022: SOX2 20726797 ChIP-Seq SW620 Human | SOX2      |
| 36 PKIA    | Enrichr CHEA_2022: SOX2 20726797 ChIP-Seq SW620 Human | SOX2      |
| 37 SFXN3   | Enrichr CHEA_2022: SOX2 20726797 ChIP-Seq SW620 Human | SOX2      |
| 38 CHST5   | Enrichr CHEA_2022: SOX2 20726797 ChIP-Seq SW620 Human | SOX2      |
| 39 PKIG    | Enrichr CHEA_2022: SOX2 20726797 ChIP-Seq SW620 Human | SOX2      |
| 40 ATF4    | Enrichr CHEA_2022: SOX2 20726797 ChIP-Seq SW620 Human | SOX2      |
| 41 ATF5    | Enrichr CHEA_2022: SOX2 20726797 ChIP-Seq SW620 Human | SOX2      |
| 42 CHST4   | Enrichr CHEA_2022: SOX2 20726797 ChIP-Seq SW620 Human | SOX2      |
| 43 CDCA2   | Enrichr CHEA_2022: SOX2 20726797 ChIP-Seq SW620 Human | SOX2      |
| 44 PDGFC   | Enrichr CHEA_2022: SOX2 20726797 ChIP-Seq SW620 Human | SOX2      |
| 45 ZNF22   | Enrichr CHEA_2022: SOX2 20726797 ChIP-Seq SW620 Human | SOX2      |
| 46 GATA6   | Enrichr CHEA_2022: SOX2 20726797 ChIP-Seq SW620 Human | SOX2      |
| 47 PDGFA   | Enrichr CHEA_2022: SOX2 20726797 ChIP-Seq SW620 Human | SOX2      |
| 48 F11R    | Enrichr CHEA_2022: SOX2 20726797 ChIP-Seq SW620 Human | SOX2      |
| 49 GATA3   | Enrichr CHEA_2022: SOX2 20726797 ChIP-Seq SW620 Human | SOX2      |
| 50 ALKBH8  | Enrichr CHEA_2022: SOX2 20726797 ChIP-Seq SW620 Human | SOX2      |
| 51 GATA2   | Enrichr CHEA_2022: SOX2 20726797 ChIP-Seq SW620 Human | SOX2      |
| 52 ZNF26   | Enrichr CHEA_2022: SOX2 20726797 ChIP-Seq SW620 Human | SOX2      |
| 53 ALKBH6  | Enrichr CHEA_2022: SOX2 20726797 ChIP-Seq SW620 Human | SOX2      |
| 54 EPB41L1 | Enrichr CHEA_2022: SOX2 20726797 ChIP-Seq SW620 Human | SOX2      |
| 55 ZC3H12A | Enrichr CHEA_2022: SOX2 20726797 ChIP-Seq SW620 Human | SOX2      |
| 56 EPB41L2 | Enrichr CHEA_2022: SOX2 20726797 ChIP-Seq SW620 Human | SOX2      |
| 57 FAM110C | Enrichr CHEA_2022: SOX2 20726797 ChIP-Seq SW620 Human | SOX2      |
| 58 NKX3-1  | Enrichr CHEA_2022: SOX2 20726797 ChIP-Seq SW620 Human | SOX2      |
| 59 PIP5K1B | Enrichr CHEA_2022: SOX2 20726797 ChIP-Seq SW620 Human | SOX2      |

|     |          |                                                       |      |
|-----|----------|-------------------------------------------------------|------|
| 60  | PRKACB   | Enrichr CHEA_2022: SOX2 20726797 ChIP-Seq SW620 Human | SOX2 |
| 61  | ZNF488   | Enrichr CHEA_2022: SOX2 20726797 ChIP-Seq SW620 Human | SOX2 |
| 62  | DUSP5    | Enrichr CHEA_2022: SOX2 20726797 ChIP-Seq SW620 Human | SOX2 |
| 63  | FUCA1    | Enrichr CHEA_2022: SOX2 20726797 ChIP-Seq SW620 Human | SOX2 |
| 64  | JUN      | Enrichr CHEA_2022: SOX2 20726797 ChIP-Seq SW620 Human | SOX2 |
| 65  | DUSP4    | Enrichr CHEA_2022: SOX2 20726797 ChIP-Seq SW620 Human | SOX2 |
| 66  | JUP      | Enrichr CHEA_2022: SOX2 20726797 ChIP-Seq SW620 Human | SOX2 |
| 67  | FN1      | Enrichr CHEA_2022: SOX2 20726797 ChIP-Seq SW620 Human | SOX2 |
| 68  | DCBLD2   | Enrichr CHEA_2022: SOX2 20726797 ChIP-Seq SW620 Human | SOX2 |
| 69  | TMEFF1   | Enrichr CHEA_2022: SOX2 20726797 ChIP-Seq SW620 Human | SOX2 |
| 70  | SLC7A5   | Enrichr CHEA_2022: SOX2 20726797 ChIP-Seq SW620 Human | SOX2 |
| 71  | CENPF    | Enrichr CHEA_2022: SOX2 20726797 ChIP-Seq SW620 Human | SOX2 |
| 72  | SLC7A7   | Enrichr CHEA_2022: SOX2 20726797 ChIP-Seq SW620 Human | SOX2 |
| 73  | SLC7A8   | Enrichr CHEA_2022: SOX2 20726797 ChIP-Seq SW620 Human | SOX2 |
| 74  | DPYD     | Enrichr CHEA_2022: SOX2 20726797 ChIP-Seq SW620 Human | SOX2 |
| 75  | FXYD6    | Enrichr CHEA_2022: SOX2 20726797 ChIP-Seq SW620 Human | SOX2 |
| 76  | RAPGEF4  | Enrichr CHEA_2022: SOX2 20726797 ChIP-Seq SW620 Human | SOX2 |
| 77  | RAPGEF5  | Enrichr CHEA_2022: SOX2 20726797 ChIP-Seq SW620 Human | SOX2 |
| 78  | LIMS2    | Enrichr CHEA_2022: SOX2 20726797 ChIP-Seq SW620 Human | SOX2 |
| 79  | TFCP2L1  | Enrichr CHEA_2022: SOX2 20726797 ChIP-Seq SW620 Human | SOX2 |
| 80  | ZC3HAV1  | Enrichr CHEA_2022: SOX2 20726797 ChIP-Seq SW620 Human | SOX2 |
| 81  | SLC7A1   | Enrichr CHEA_2022: SOX2 20726797 ChIP-Seq SW620 Human | SOX2 |
| 82  | HOXC13   | Enrichr CHEA_2022: SOX2 20726797 ChIP-Seq SW620 Human | SOX2 |
| 83  | SLC7A2   | Enrichr CHEA_2022: SOX2 20726797 ChIP-Seq SW620 Human | SOX2 |
| 84  | HOXC10   | Enrichr CHEA_2022: SOX2 20726797 ChIP-Seq SW620 Human | SOX2 |
| 85  | HLCS     | Enrichr CHEA_2022: SOX2 20726797 ChIP-Seq SW620 Human | SOX2 |
| 86  | SHH      | Enrichr CHEA_2022: SOX2 20726797 ChIP-Seq SW620 Human | SOX2 |
| 87  | PANX1    | Enrichr CHEA_2022: SOX2 20726797 ChIP-Seq SW620 Human | SOX2 |
| 88  | DLGAP1   | Enrichr CHEA_2022: SOX2 20726797 ChIP-Seq SW620 Human | SOX2 |
| 89  | ZNF468   | Enrichr CHEA_2022: SOX2 20726797 ChIP-Seq SW620 Human | SOX2 |
| 90  | SLC18A2  | Enrichr CHEA_2022: SOX2 20726797 ChIP-Seq SW620 Human | SOX2 |
| 91  | PCMTD2   | Enrichr CHEA_2022: SOX2 20726797 ChIP-Seq SW620 Human | SOX2 |
| 92  | EGLN2    | Enrichr CHEA_2022: SOX2 20726797 ChIP-Seq SW620 Human | SOX2 |
| 93  | ATAD2    | Enrichr CHEA_2022: SOX2 20726797 ChIP-Seq SW620 Human | SOX2 |
| 94  | CDKL5    | Enrichr CHEA_2022: SOX2 20726797 ChIP-Seq SW620 Human | SOX2 |
| 95  | PPARA    | Enrichr CHEA_2022: SOX2 20726797 ChIP-Seq SW620 Human | SOX2 |
| 96  | DGAT1    | Enrichr CHEA_2022: SOX2 20726797 ChIP-Seq SW620 Human | SOX2 |
| 97  | SNX25    | Enrichr CHEA_2022: SOX2 20726797 ChIP-Seq SW620 Human | SOX2 |
| 98  | BGN      | Enrichr CHEA_2022: SOX2 20726797 ChIP-Seq SW620 Human | SOX2 |
| 99  | ADAM10   | Enrichr CHEA_2022: SOX2 20726797 ChIP-Seq SW620 Human | SOX2 |
| 100 | SLC39A14 | Enrichr CHEA_2022: SOX2 20726797 ChIP-Seq SW620 Human | SOX2 |
| 101 | DAB2IP   | Enrichr CHEA_2022: SOX2 20726797 ChIP-Seq SW620 Human | SOX2 |
| 102 | MYBBP1A  | Enrichr CHEA_2022: SOX2 20726797 ChIP-Seq SW620 Human | SOX2 |
| 103 | ADAM17   | Enrichr CHEA_2022: SOX2 20726797 ChIP-Seq SW620 Human | SOX2 |
| 104 | LARS2    | Enrichr CHEA_2022: SOX2 20726797 ChIP-Seq SW620 Human | SOX2 |
| 105 | APEX2    | Enrichr CHEA_2022: SOX2 20726797 ChIP-Seq SW620 Human | SOX2 |
| 106 | ETNK1    | Enrichr CHEA_2022: SOX2 20726797 ChIP-Seq SW620 Human | SOX2 |
| 107 | PPARG    | Enrichr CHEA_2022: SOX2 20726797 ChIP-Seq SW620 Human | SOX2 |
| 108 | TSR1     | Enrichr CHEA_2022: SOX2 20726797 ChIP-Seq SW620 Human | SOX2 |
| 109 | LGR6     | Enrichr CHEA_2022: SOX2 20726797 ChIP-Seq SW620 Human | SOX2 |
| 110 | PPARD    | Enrichr CHEA_2022: SOX2 20726797 ChIP-Seq SW620 Human | SOX2 |
| 111 | LGR4     | Enrichr CHEA_2022: SOX2 20726797 ChIP-Seq SW620 Human | SOX2 |
| 112 | OAT      | Enrichr CHEA_2022: SOX2 20726797 ChIP-Seq SW620 Human | SOX2 |
| 113 | MTMR10   | Enrichr CHEA_2022: SOX2 20726797 ChIP-Seq SW620 Human | SOX2 |
| 114 | SNX10    | Enrichr CHEA_2022: SOX2 20726797 ChIP-Seq SW620 Human | SOX2 |
| 115 | SMPD3    | Enrichr CHEA_2022: SOX2 20726797 ChIP-Seq SW620 Human | SOX2 |
| 116 | WRN      | Enrichr CHEA_2022: SOX2 20726797 ChIP-Seq SW620 Human | SOX2 |
| 117 | FGFR1OP2 | Enrichr CHEA_2022: SOX2 20726797 ChIP-Seq SW620 Human | SOX2 |
| 118 | PLAGL1   | Enrichr CHEA_2022: SOX2 20726797 ChIP-Seq SW620 Human | SOX2 |
| 119 | AGR2     | Enrichr CHEA_2022: SOX2 20726797 ChIP-Seq SW620 Human | SOX2 |
| 120 | NUDT13   | Enrichr CHEA_2022: SOX2 20726797 ChIP-Seq SW620 Human | SOX2 |

|     |          |                                                       |      |
|-----|----------|-------------------------------------------------------|------|
| 121 | FADS1    | Enrichr CHEA_2022: SOX2 20726797 ChIP-Seq SW620 Human | SOX2 |
| 122 | MAP3K1   | Enrichr CHEA_2022: SOX2 20726797 ChIP-Seq SW620 Human | SOX2 |
| 123 | BIK      | Enrichr CHEA_2022: SOX2 20726797 ChIP-Seq SW620 Human | SOX2 |
| 124 | CORO2A   | Enrichr CHEA_2022: SOX2 20726797 ChIP-Seq SW620 Human | SOX2 |
| 125 | FBXO17   | Enrichr CHEA_2022: SOX2 20726797 ChIP-Seq SW620 Human | SOX2 |
| 126 | STX8     | Enrichr CHEA_2022: SOX2 20726797 ChIP-Seq SW620 Human | SOX2 |
| 127 | ATP11C   | Enrichr CHEA_2022: SOX2 20726797 ChIP-Seq SW620 Human | SOX2 |
| 128 | SDCBP2   | Enrichr CHEA_2022: SOX2 20726797 ChIP-Seq SW620 Human | SOX2 |
| 129 | WT1      | Enrichr CHEA_2022: SOX2 20726797 ChIP-Seq SW620 Human | SOX2 |
| 130 | MFNG     | Enrichr CHEA_2022: SOX2 20726797 ChIP-Seq SW620 Human | SOX2 |
| 131 | LY6E     | Enrichr CHEA_2022: SOX2 20726797 ChIP-Seq SW620 Human | SOX2 |
| 132 | PDCD4    | Enrichr CHEA_2022: SOX2 20726797 ChIP-Seq SW620 Human | SOX2 |
| 133 | PKP4     | Enrichr CHEA_2022: SOX2 20726797 ChIP-Seq SW620 Human | SOX2 |
| 134 | IL6ST    | Enrichr CHEA_2022: SOX2 20726797 ChIP-Seq SW620 Human | SOX2 |
| 135 | AGRN     | Enrichr CHEA_2022: SOX2 20726797 ChIP-Seq SW620 Human | SOX2 |
| 136 | FRK      | Enrichr CHEA_2022: SOX2 20726797 ChIP-Seq SW620 Human | SOX2 |
| 137 | ZNF430   | Enrichr CHEA_2022: SOX2 20726797 ChIP-Seq SW620 Human | SOX2 |
| 138 | NIP7     | Enrichr CHEA_2022: SOX2 20726797 ChIP-Seq SW620 Human | SOX2 |
| 139 | PDCD6    | Enrichr CHEA_2022: SOX2 20726797 ChIP-Seq SW620 Human | SOX2 |
| 140 | TSPAN31  | Enrichr CHEA_2022: SOX2 20726797 ChIP-Seq SW620 Human | SOX2 |
| 141 | ATP10B   | Enrichr CHEA_2022: SOX2 20726797 ChIP-Seq SW620 Human | SOX2 |
| 142 | PLOD2    | Enrichr CHEA_2022: SOX2 20726797 ChIP-Seq SW620 Human | SOX2 |
| 143 | FRY      | Enrichr CHEA_2022: SOX2 20726797 ChIP-Seq SW620 Human | SOX2 |
| 144 | EGFR     | Enrichr CHEA_2022: SOX2 20726797 ChIP-Seq SW620 Human | SOX2 |
| 145 | LAPTM4A  | Enrichr CHEA_2022: SOX2 20726797 ChIP-Seq SW620 Human | SOX2 |
| 146 | STX5     | Enrichr CHEA_2022: SOX2 20726797 ChIP-Seq SW620 Human | SOX2 |
| 147 | MAP3K8   | Enrichr CHEA_2022: SOX2 20726797 ChIP-Seq SW620 Human | SOX2 |
| 148 | ZNF420   | Enrichr CHEA_2022: SOX2 20726797 ChIP-Seq SW620 Human | SOX2 |
| 149 | NEK6     | Enrichr CHEA_2022: SOX2 20726797 ChIP-Seq SW620 Human | SOX2 |
| 150 | BNIP3L   | Enrichr CHEA_2022: SOX2 20726797 ChIP-Seq SW620 Human | SOX2 |
| 151 | SLC9A3R1 | Enrichr CHEA_2022: SOX2 20726797 ChIP-Seq SW620 Human | SOX2 |
| 152 | PIAS3    | Enrichr CHEA_2022: SOX2 20726797 ChIP-Seq SW620 Human | SOX2 |
| 153 | FBXO31   | Enrichr CHEA_2022: SOX2 20726797 ChIP-Seq SW620 Human | SOX2 |
| 154 | FBXO32   | Enrichr CHEA_2022: SOX2 20726797 ChIP-Seq SW620 Human | SOX2 |
| 155 | FBXO30   | Enrichr CHEA_2022: SOX2 20726797 ChIP-Seq SW620 Human | SOX2 |
| 156 | LCN2     | Enrichr CHEA_2022: SOX2 20726797 ChIP-Seq SW620 Human | SOX2 |
| 157 | BMP2K    | Enrichr CHEA_2022: SOX2 20726797 ChIP-Seq SW620 Human | SOX2 |
| 158 | MNAT1    | Enrichr CHEA_2022: SOX2 20726797 ChIP-Seq SW620 Human | SOX2 |
| 159 | SLC27A5  | Enrichr CHEA_2022: SOX2 20726797 ChIP-Seq SW620 Human | SOX2 |
| 160 | OSBP1A   | Enrichr CHEA_2022: SOX2 20726797 ChIP-Seq SW620 Human | SOX2 |
| 161 | KCNE3    | Enrichr CHEA_2022: SOX2 20726797 ChIP-Seq SW620 Human | SOX2 |
| 162 | COL17A1  | Enrichr CHEA_2022: SOX2 20726797 ChIP-Seq SW620 Human | SOX2 |
| 163 | EIF4EBP1 | Enrichr CHEA_2022: SOX2 20726797 ChIP-Seq SW620 Human | SOX2 |
| 164 | LY75     | Enrichr CHEA_2022: SOX2 20726797 ChIP-Seq SW620 Human | SOX2 |
| 165 | MSI2     | Enrichr CHEA_2022: SOX2 20726797 ChIP-Seq SW620 Human | SOX2 |
| 166 | NHSL1    | Enrichr CHEA_2022: SOX2 20726797 ChIP-Seq SW620 Human | SOX2 |
| 167 | MED31    | Enrichr CHEA_2022: SOX2 20726797 ChIP-Seq SW620 Human | SOX2 |
| 168 | FNTA     | Enrichr CHEA_2022: SOX2 20726797 ChIP-Seq SW620 Human | SOX2 |
| 169 | UROD     | Enrichr CHEA_2022: SOX2 20726797 ChIP-Seq SW620 Human | SOX2 |
| 170 | NEK1     | Enrichr CHEA_2022: SOX2 20726797 ChIP-Seq SW620 Human | SOX2 |
| 171 | NEK2     | Enrichr CHEA_2022: SOX2 20726797 ChIP-Seq SW620 Human | SOX2 |
| 172 | NFATC2IP | Enrichr CHEA_2022: SOX2 20726797 ChIP-Seq SW620 Human | SOX2 |
| 173 | SLC2A4RG | Enrichr CHEA_2022: SOX2 20726797 ChIP-Seq SW620 Human | SOX2 |
| 174 | ITGA5    | Enrichr CHEA_2022: SOX2 20726797 ChIP-Seq SW620 Human | SOX2 |
| 175 | ITGA3    | Enrichr CHEA_2022: SOX2 20726797 ChIP-Seq SW620 Human | SOX2 |
| 176 | TNFRSF19 | Enrichr CHEA_2022: SOX2 20726797 ChIP-Seq SW620 Human | SOX2 |
| 177 | TNFRSF1B | Enrichr CHEA_2022: SOX2 20726797 ChIP-Seq SW620 Human | SOX2 |
| 178 | TMBIM1   | Enrichr CHEA_2022: SOX2 20726797 ChIP-Seq SW620 Human | SOX2 |
| 179 | DBNDD2   | Enrichr CHEA_2022: SOX2 20726797 ChIP-Seq SW620 Human | SOX2 |
| 180 | TNFRSF21 | Enrichr CHEA_2022: SOX2 20726797 ChIP-Seq SW620 Human | SOX2 |
| 181 | LCP1     | Enrichr CHEA_2022: SOX2 20726797 ChIP-Seq SW620 Human | SOX2 |

|     |          |                                                       |      |
|-----|----------|-------------------------------------------------------|------|
| 182 | TMBIM4   | Enrichr CHEA_2022: SOX2 20726797 ChIP-Seq SW620 Human | SOX2 |
| 183 | PCCA     | Enrichr CHEA_2022: SOX2 20726797 ChIP-Seq SW620 Human | SOX2 |
| 184 | SP5      | Enrichr CHEA_2022: SOX2 20726797 ChIP-Seq SW620 Human | SOX2 |
| 185 | OGT      | Enrichr CHEA_2022: SOX2 20726797 ChIP-Seq SW620 Human | SOX2 |
| 186 | KCNK1    | Enrichr CHEA_2022: SOX2 20726797 ChIP-Seq SW620 Human | SOX2 |
| 187 | BCAR3    | Enrichr CHEA_2022: SOX2 20726797 ChIP-Seq SW620 Human | SOX2 |
| 188 | MCFD2    | Enrichr CHEA_2022: SOX2 20726797 ChIP-Seq SW620 Human | SOX2 |
| 189 | SHMT2    | Enrichr CHEA_2022: SOX2 20726797 ChIP-Seq SW620 Human | SOX2 |
| 190 | MLLT3    | Enrichr CHEA_2022: SOX2 20726797 ChIP-Seq SW620 Human | SOX2 |
| 191 | SPATA7   | Enrichr CHEA_2022: SOX2 20726797 ChIP-Seq SW620 Human | SOX2 |
| 192 | MLLT6    | Enrichr CHEA_2022: SOX2 20726797 ChIP-Seq SW620 Human | SOX2 |
| 193 | ALAD     | Enrichr CHEA_2022: SOX2 20726797 ChIP-Seq SW620 Human | SOX2 |
| 194 | RDH13    | Enrichr CHEA_2022: SOX2 20726797 ChIP-Seq SW620 Human | SOX2 |
| 195 | KIAA1522 | Enrichr CHEA_2022: SOX2 20726797 ChIP-Seq SW620 Human | SOX2 |
| 196 | BOK      | Enrichr CHEA_2022: SOX2 20726797 ChIP-Seq SW620 Human | SOX2 |
| 197 | BCAS1    | Enrichr CHEA_2022: SOX2 20726797 ChIP-Seq SW620 Human | SOX2 |
| 198 | NADK     | Enrichr CHEA_2022: SOX2 20726797 ChIP-Seq SW620 Human | SOX2 |
| 199 | MBIP     | Enrichr CHEA_2022: SOX2 20726797 ChIP-Seq SW620 Human | SOX2 |
| 200 | STYK1    | Enrichr CHEA_2022: SOX2 20726797 ChIP-Seq SW620 Human | SOX2 |
| 201 | GZMB     | Enrichr CHEA_2022: SOX2 20726797 ChIP-Seq SW620 Human | SOX2 |
| 202 | MID1IP1  | Enrichr CHEA_2022: SOX2 20726797 ChIP-Seq SW620 Human | SOX2 |
| 203 | MYO10    | Enrichr CHEA_2022: SOX2 20726797 ChIP-Seq SW620 Human | SOX2 |
| 204 | RNASET2  | Enrichr CHEA_2022: SOX2 20726797 ChIP-Seq SW620 Human | SOX2 |
| 205 | CABLES1  | Enrichr CHEA_2022: SOX2 20726797 ChIP-Seq SW620 Human | SOX2 |
| 206 | TM6SF1   | Enrichr CHEA_2022: SOX2 20726797 ChIP-Seq SW620 Human | SOX2 |
| 207 | TBX3     | Enrichr CHEA_2022: SOX2 20726797 ChIP-Seq SW620 Human | SOX2 |
| 208 | CFDP1    | Enrichr CHEA_2022: SOX2 20726797 ChIP-Seq SW620 Human | SOX2 |
| 209 | MYO1C    | Enrichr CHEA_2022: SOX2 20726797 ChIP-Seq SW620 Human | SOX2 |
| 210 | TSPAN14  | Enrichr CHEA_2022: SOX2 20726797 ChIP-Seq SW620 Human | SOX2 |
| 211 | MYO1B    | Enrichr CHEA_2022: SOX2 20726797 ChIP-Seq SW620 Human | SOX2 |
| 212 | TRIM36   | Enrichr CHEA_2022: SOX2 20726797 ChIP-Seq SW620 Human | SOX2 |
| 213 | KCTD15   | Enrichr CHEA_2022: SOX2 20726797 ChIP-Seq SW620 Human | SOX2 |
| 214 | KCTD12   | Enrichr CHEA_2022: SOX2 20726797 ChIP-Seq SW620 Human | SOX2 |
| 215 | TRIM32   | Enrichr CHEA_2022: SOX2 20726797 ChIP-Seq SW620 Human | SOX2 |
| 216 | PIK3AP1  | Enrichr CHEA_2022: SOX2 20726797 ChIP-Seq SW620 Human | SOX2 |
| 217 | TRIM34   | Enrichr CHEA_2022: SOX2 20726797 ChIP-Seq SW620 Human | SOX2 |
| 218 | PRPS2    | Enrichr CHEA_2022: SOX2 20726797 ChIP-Seq SW620 Human | SOX2 |
| 219 | SRC      | Enrichr CHEA_2022: SOX2 20726797 ChIP-Seq SW620 Human | SOX2 |
| 220 | MSLN     | Enrichr CHEA_2022: SOX2 20726797 ChIP-Seq SW620 Human | SOX2 |
| 221 | TRIM31   | Enrichr CHEA_2022: SOX2 20726797 ChIP-Seq SW620 Human | SOX2 |
| 222 | ITGB5    | Enrichr CHEA_2022: SOX2 20726797 ChIP-Seq SW620 Human | SOX2 |
| 223 | SRI      | Enrichr CHEA_2022: SOX2 20726797 ChIP-Seq SW620 Human | SOX2 |
| 224 | TSPAN12  | Enrichr CHEA_2022: SOX2 20726797 ChIP-Seq SW620 Human | SOX2 |
| 225 | NRGN     | Enrichr CHEA_2022: SOX2 20726797 ChIP-Seq SW620 Human | SOX2 |
| 226 | ZNRF1    | Enrichr CHEA_2022: SOX2 20726797 ChIP-Seq SW620 Human | SOX2 |
| 227 | ZNRF2    | Enrichr CHEA_2022: SOX2 20726797 ChIP-Seq SW620 Human | SOX2 |
| 228 | SRR      | Enrichr CHEA_2022: SOX2 20726797 ChIP-Seq SW620 Human | SOX2 |
| 229 | HHEX     | Enrichr CHEA_2022: SOX2 20726797 ChIP-Seq SW620 Human | SOX2 |
| 230 | KIAA1549 | Enrichr CHEA_2022: SOX2 20726797 ChIP-Seq SW620 Human | SOX2 |
| 231 | TRIM29   | Enrichr CHEA_2022: SOX2 20726797 ChIP-Seq SW620 Human | SOX2 |
| 232 | PTER     | Enrichr CHEA_2022: SOX2 20726797 ChIP-Seq SW620 Human | SOX2 |
| 233 | IGF2BP1  | Enrichr CHEA_2022: SOX2 20726797 ChIP-Seq SW620 Human | SOX2 |
| 234 | ITGB8    | Enrichr CHEA_2022: SOX2 20726797 ChIP-Seq SW620 Human | SOX2 |
| 235 | ITGAV    | Enrichr CHEA_2022: SOX2 20726797 ChIP-Seq SW620 Human | SOX2 |
| 236 | FYN      | Enrichr CHEA_2022: SOX2 20726797 ChIP-Seq SW620 Human | SOX2 |
| 237 | ARL5B    | Enrichr CHEA_2022: SOX2 20726797 ChIP-Seq SW620 Human | SOX2 |
| 238 | SMARCA1  | Enrichr CHEA_2022: SOX2 20726797 ChIP-Seq SW620 Human | SOX2 |
| 239 | ACTN4    | Enrichr CHEA_2022: SOX2 20726797 ChIP-Seq SW620 Human | SOX2 |
| 240 | FBXO3    | Enrichr CHEA_2022: SOX2 20726797 ChIP-Seq SW620 Human | SOX2 |
| 241 | ARL14    | Enrichr CHEA_2022: SOX2 20726797 ChIP-Seq SW620 Human | SOX2 |
| 242 | SMARCA2  | Enrichr CHEA_2022: SOX2 20726797 ChIP-Seq SW620 Human | SOX2 |

|              |                                                       |      |
|--------------|-------------------------------------------------------|------|
| 243 PPA2     | Enrichr CHEA_2022: SOX2 20726797 ChIP-Seq SW620 Human | SOX2 |
| 244 SOAT1    | Enrichr CHEA_2022: SOX2 20726797 ChIP-Seq SW620 Human | SOX2 |
| 245 NINJ2    | Enrichr CHEA_2022: SOX2 20726797 ChIP-Seq SW620 Human | SOX2 |
| 246 MT1G     | Enrichr CHEA_2022: SOX2 20726797 ChIP-Seq SW620 Human | SOX2 |
| 247 MT1H     | Enrichr CHEA_2022: SOX2 20726797 ChIP-Seq SW620 Human | SOX2 |
| 248 TRIM16   | Enrichr CHEA_2022: SOX2 20726797 ChIP-Seq SW620 Human | SOX2 |
| 249 CCDC82   | Enrichr CHEA_2022: SOX2 20726797 ChIP-Seq SW620 Human | SOX2 |
| 250 RIN3     | Enrichr CHEA_2022: SOX2 20726797 ChIP-Seq SW620 Human | SOX2 |
| 251 MT1F     | Enrichr CHEA_2022: SOX2 20726797 ChIP-Seq SW620 Human | SOX2 |
| 252 SLC23A3  | Enrichr CHEA_2022: SOX2 20726797 ChIP-Seq SW620 Human | SOX2 |
| 253 EPAS1    | Enrichr CHEA_2022: SOX2 20726797 ChIP-Seq SW620 Human | SOX2 |
| 254 TAGLN    | Enrichr CHEA_2022: SOX2 20726797 ChIP-Seq SW620 Human | SOX2 |
| 255 CCDC69   | Enrichr CHEA_2022: SOX2 20726797 ChIP-Seq SW620 Human | SOX2 |
| 256 MYCBP2   | Enrichr CHEA_2022: SOX2 20726797 ChIP-Seq SW620 Human | SOX2 |
| 257 CPNE8    | Enrichr CHEA_2022: SOX2 20726797 ChIP-Seq SW620 Human | SOX2 |
| 258 IL27RA   | Enrichr CHEA_2022: SOX2 20726797 ChIP-Seq SW620 Human | SOX2 |
| 259 STS      | Enrichr CHEA_2022: SOX2 20726797 ChIP-Seq SW620 Human | SOX2 |
| 260 CDC23    | Enrichr CHEA_2022: SOX2 20726797 ChIP-Seq SW620 Human | SOX2 |
| 261 BSG      | Enrichr CHEA_2022: SOX2 20726797 ChIP-Seq SW620 Human | SOX2 |
| 262 CSNK1D   | Enrichr CHEA_2022: SOX2 20726797 ChIP-Seq SW620 Human | SOX2 |
| 263 PEG10    | Enrichr CHEA_2022: SOX2 20726797 ChIP-Seq SW620 Human | SOX2 |
| 264 STK38L   | Enrichr CHEA_2022: SOX2 20726797 ChIP-Seq SW620 Human | SOX2 |
| 265 CCDC77   | Enrichr CHEA_2022: SOX2 20726797 ChIP-Seq SW620 Human | SOX2 |
| 266 E2F8     | Enrichr CHEA_2022: SOX2 20726797 ChIP-Seq SW620 Human | SOX2 |
| 267 EGR3     | Enrichr CHEA_2022: SOX2 20726797 ChIP-Seq SW620 Human | SOX2 |
| 268 TGDS     | Enrichr CHEA_2022: SOX2 20726797 ChIP-Seq SW620 Human | SOX2 |
| 269 MYO5A    | Enrichr CHEA_2022: SOX2 20726797 ChIP-Seq SW620 Human | SOX2 |
| 270 RAB27B   | Enrichr CHEA_2022: SOX2 20726797 ChIP-Seq SW620 Human | SOX2 |
| 271 MYO5B    | Enrichr CHEA_2022: SOX2 20726797 ChIP-Seq SW620 Human | SOX2 |
| 272 CSNK1E   | Enrichr CHEA_2022: SOX2 20726797 ChIP-Seq SW620 Human | SOX2 |
| 273 PTK6     | Enrichr CHEA_2022: SOX2 20726797 ChIP-Seq SW620 Human | SOX2 |
| 274 EXT1     | Enrichr CHEA_2022: SOX2 20726797 ChIP-Seq SW620 Human | SOX2 |
| 275 PTK2     | Enrichr CHEA_2022: SOX2 20726797 ChIP-Seq SW620 Human | SOX2 |
| 276 CNKSR3   | Enrichr CHEA_2022: SOX2 20726797 ChIP-Seq SW620 Human | SOX2 |
| 277 BTC      | Enrichr CHEA_2022: SOX2 20726797 ChIP-Seq SW620 Human | SOX2 |
| 278 TLCD1    | Enrichr CHEA_2022: SOX2 20726797 ChIP-Seq SW620 Human | SOX2 |
| 279 FBXL2    | Enrichr CHEA_2022: SOX2 20726797 ChIP-Seq SW620 Human | SOX2 |
| 280 SDC1     | Enrichr CHEA_2022: SOX2 20726797 ChIP-Seq SW620 Human | SOX2 |
| 281 MON1B    | Enrichr CHEA_2022: SOX2 20726797 ChIP-Seq SW620 Human | SOX2 |
| 282 APOBEC3B | Enrichr CHEA_2022: SOX2 20726797 ChIP-Seq SW620 Human | SOX2 |
| 283 ATP6V1B2 | Enrichr CHEA_2022: SOX2 20726797 ChIP-Seq SW620 Human | SOX2 |
| 284 APOBEC3C | Enrichr CHEA_2022: SOX2 20726797 ChIP-Seq SW620 Human | SOX2 |
| 285 LTV1     | Enrichr CHEA_2022: SOX2 20726797 ChIP-Seq SW620 Human | SOX2 |
| 286 SLC45A4  | Enrichr CHEA_2022: SOX2 20726797 ChIP-Seq SW620 Human | SOX2 |
| 287 WFDC2    | Enrichr CHEA_2022: SOX2 20726797 ChIP-Seq SW620 Human | SOX2 |
| 288 MT1X     | Enrichr CHEA_2022: SOX2 20726797 ChIP-Seq SW620 Human | SOX2 |
| 289 ICAM2    | Enrichr CHEA_2022: SOX2 20726797 ChIP-Seq SW620 Human | SOX2 |
| 290 LGALS4   | Enrichr CHEA_2022: SOX2 20726797 ChIP-Seq SW620 Human | SOX2 |
| 291 MT2A     | Enrichr CHEA_2022: SOX2 20726797 ChIP-Seq SW620 Human | SOX2 |
| 292 CCDC92   | Enrichr CHEA_2022: SOX2 20726797 ChIP-Seq SW620 Human | SOX2 |
| 293 LGALS1   | Enrichr CHEA_2022: SOX2 20726797 ChIP-Seq SW620 Human | SOX2 |
| 294 REG4     | Enrichr CHEA_2022: SOX2 20726797 ChIP-Seq SW620 Human | SOX2 |
| 295 TNFSF10  | Enrichr CHEA_2022: SOX2 20726797 ChIP-Seq SW620 Human | SOX2 |
| 296 LGALS8   | Enrichr CHEA_2022: SOX2 20726797 ChIP-Seq SW620 Human | SOX2 |
| 297 CCDC96   | Enrichr CHEA_2022: SOX2 20726797 ChIP-Seq SW620 Human | SOX2 |
| 298 SPA17    | Enrichr CHEA_2022: SOX2 20726797 ChIP-Seq SW620 Human | SOX2 |
| 299 GABBR1   | Enrichr CHEA_2022: SOX2 20726797 ChIP-Seq SW620 Human | SOX2 |
| 300 IL15     | Enrichr CHEA_2022: SOX2 20726797 ChIP-Seq SW620 Human | SOX2 |
| 301 SLC10A3  | Enrichr CHEA_2022: SOX2 20726797 ChIP-Seq SW620 Human | SOX2 |
| 302 GAB2     | Enrichr CHEA_2022: SOX2 20726797 ChIP-Seq SW620 Human | SOX2 |
| 303 GAB1     | Enrichr CHEA_2022: SOX2 20726797 ChIP-Seq SW620 Human | SOX2 |

|               |                                                       |      |
|---------------|-------------------------------------------------------|------|
| 304 KLHL3     | Enrichr CHEA_2022: SOX2 20726797 ChIP-Seq SW620 Human | SOX2 |
| 305 KLHL5     | Enrichr CHEA_2022: SOX2 20726797 ChIP-Seq SW620 Human | SOX2 |
| 306 ZHX1      | Enrichr CHEA_2022: SOX2 20726797 ChIP-Seq SW620 Human | SOX2 |
| 307 RAP2A     | Enrichr CHEA_2022: SOX2 20726797 ChIP-Seq SW620 Human | SOX2 |
| 308 CTTNBP2NL | Enrichr CHEA_2022: SOX2 20726797 ChIP-Seq SW620 Human | SOX2 |
| 309 BST2      | Enrichr CHEA_2022: SOX2 20726797 ChIP-Seq SW620 Human | SOX2 |
| 310 DEPDC7    | Enrichr CHEA_2022: SOX2 20726797 ChIP-Seq SW620 Human | SOX2 |
| 311 KITLG     | Enrichr CHEA_2022: SOX2 20726797 ChIP-Seq SW620 Human | SOX2 |
| 312 ARHGEF4   | Enrichr CHEA_2022: SOX2 20726797 ChIP-Seq SW620 Human | SOX2 |
| 313 ARHGEF3   | Enrichr CHEA_2022: SOX2 20726797 ChIP-Seq SW620 Human | SOX2 |
| 314 FXJ1      | Enrichr CHEA_2022: SOX2 20726797 ChIP-Seq SW620 Human | SOX2 |
| 315 RANBP10   | Enrichr CHEA_2022: SOX2 20726797 ChIP-Seq SW620 Human | SOX2 |
| 316 NRN1      | Enrichr CHEA_2022: SOX2 20726797 ChIP-Seq SW620 Human | SOX2 |
| 317 NOXO1     | Enrichr CHEA_2022: SOX2 20726797 ChIP-Seq SW620 Human | SOX2 |
| 318 PPCS      | Enrichr CHEA_2022: SOX2 20726797 ChIP-Seq SW620 Human | SOX2 |
| 319 TFB1M     | Enrichr CHEA_2022: SOX2 20726797 ChIP-Seq SW620 Human | SOX2 |
| 320 KALRN     | Enrichr CHEA_2022: SOX2 20726797 ChIP-Seq SW620 Human | SOX2 |
| 321 PPP3CA    | Enrichr CHEA_2022: SOX2 20726797 ChIP-Seq SW620 Human | SOX2 |
| 322 SEC14L4   | Enrichr CHEA_2022: SOX2 20726797 ChIP-Seq SW620 Human | SOX2 |
| 323 RRAS      | Enrichr CHEA_2022: SOX2 20726797 ChIP-Seq SW620 Human | SOX2 |
| 324 SMYD3     | Enrichr CHEA_2022: SOX2 20726797 ChIP-Seq SW620 Human | SOX2 |
| 325 HTATIP2   | Enrichr CHEA_2022: SOX2 20726797 ChIP-Seq SW620 Human | SOX2 |
| 326 PHGDH     | Enrichr CHEA_2022: SOX2 20726797 ChIP-Seq SW620 Human | SOX2 |
| 327 NFIL3     | Enrichr CHEA_2022: SOX2 20726797 ChIP-Seq SW620 Human | SOX2 |
| 328 PCK2      | Enrichr CHEA_2022: SOX2 20726797 ChIP-Seq SW620 Human | SOX2 |
| 329 LYAR      | Enrichr CHEA_2022: SOX2 20726797 ChIP-Seq SW620 Human | SOX2 |
| 330 CAP2      | Enrichr CHEA_2022: SOX2 20726797 ChIP-Seq SW620 Human | SOX2 |
| 331 GAL       | Enrichr CHEA_2022: SOX2 20726797 ChIP-Seq SW620 Human | SOX2 |
| 332 TPST2     | Enrichr CHEA_2022: SOX2 20726797 ChIP-Seq SW620 Human | SOX2 |
| 333 TTC9      | Enrichr CHEA_2022: SOX2 20726797 ChIP-Seq SW620 Human | SOX2 |
| 334 TTC8      | Enrichr CHEA_2022: SOX2 20726797 ChIP-Seq SW620 Human | SOX2 |
| 335 KCNQ1     | Enrichr CHEA_2022: SOX2 20726797 ChIP-Seq SW620 Human | SOX2 |
| 336 TPST1     | Enrichr CHEA_2022: SOX2 20726797 ChIP-Seq SW620 Human | SOX2 |
| 337 TCEA2     | Enrichr CHEA_2022: SOX2 20726797 ChIP-Seq SW620 Human | SOX2 |
| 338 TACC1     | Enrichr CHEA_2022: SOX2 20726797 ChIP-Seq SW620 Human | SOX2 |
| 339 PNPLA3    | Enrichr CHEA_2022: SOX2 20726797 ChIP-Seq SW620 Human | SOX2 |
| 340 NRP2      | Enrichr CHEA_2022: SOX2 20726797 ChIP-Seq SW620 Human | SOX2 |
| 341 CAPG      | Enrichr CHEA_2022: SOX2 20726797 ChIP-Seq SW620 Human | SOX2 |
| 342 NUDT4     | Enrichr CHEA_2022: SOX2 20726797 ChIP-Seq SW620 Human | SOX2 |
| 343 SPAG16    | Enrichr CHEA_2022: SOX2 20726797 ChIP-Seq SW620 Human | SOX2 |
| 344 HERPUD2   | Enrichr CHEA_2022: SOX2 20726797 ChIP-Seq SW620 Human | SOX2 |
| 345 AKAP13    | Enrichr CHEA_2022: SOX2 20726797 ChIP-Seq SW620 Human | SOX2 |
| 346 AKAP11    | Enrichr CHEA_2022: SOX2 20726797 ChIP-Seq SW620 Human | SOX2 |
| 347 PCM1      | Enrichr CHEA_2022: SOX2 20726797 ChIP-Seq SW620 Human | SOX2 |
| 348 AKAP12    | Enrichr CHEA_2022: SOX2 20726797 ChIP-Seq SW620 Human | SOX2 |
| 349 FAM3C     | Enrichr CHEA_2022: SOX2 20726797 ChIP-Seq SW620 Human | SOX2 |
| 350 FAM3B     | Enrichr CHEA_2022: SOX2 20726797 ChIP-Seq SW620 Human | SOX2 |
| 351 FAM3D     | Enrichr CHEA_2022: SOX2 20726797 ChIP-Seq SW620 Human | SOX2 |
| 352 RARRES1   | Enrichr CHEA_2022: SOX2 20726797 ChIP-Seq SW620 Human | SOX2 |
| 353 SPINK5    | Enrichr CHEA_2022: SOX2 20726797 ChIP-Seq SW620 Human | SOX2 |
| 354 HS3ST1    | Enrichr CHEA_2022: SOX2 20726797 ChIP-Seq SW620 Human | SOX2 |
| 355 UBE2H     | Enrichr CHEA_2022: SOX2 20726797 ChIP-Seq SW620 Human | SOX2 |
| 356 MORC4     | Enrichr CHEA_2022: SOX2 20726797 ChIP-Seq SW620 Human | SOX2 |
| 357 FAM3A     | Enrichr CHEA_2022: SOX2 20726797 ChIP-Seq SW620 Human | SOX2 |
| 358 CACHD1    | Enrichr CHEA_2022: SOX2 20726797 ChIP-Seq SW620 Human | SOX2 |
| 359 DNAJB14   | Enrichr CHEA_2022: SOX2 20726797 ChIP-Seq SW620 Human | SOX2 |
| 360 BSPRY     | Enrichr CHEA_2022: SOX2 20726797 ChIP-Seq SW620 Human | SOX2 |
| 361 CDKAL1    | Enrichr CHEA_2022: SOX2 20726797 ChIP-Seq SW620 Human | SOX2 |
| 362 YPEL2     | Enrichr CHEA_2022: SOX2 20726797 ChIP-Seq SW620 Human | SOX2 |
| 363 WDFY2     | Enrichr CHEA_2022: SOX2 20726797 ChIP-Seq SW620 Human | SOX2 |
| 364 DEGS2     | Enrichr CHEA_2022: SOX2 20726797 ChIP-Seq SW620 Human | SOX2 |



|     |          |                                                       |      |
|-----|----------|-------------------------------------------------------|------|
| 365 | WDFY3    | Enrichr CHEA_2022: SOX2 20726797 ChIP-Seq SW620 Human | SOX2 |
| 366 | OTUD1    | Enrichr CHEA_2022: SOX2 20726797 ChIP-Seq SW620 Human | SOX2 |
| 367 | PPIC     | Enrichr CHEA_2022: SOX2 20726797 ChIP-Seq SW620 Human | SOX2 |
| 368 | PPID     | Enrichr CHEA_2022: SOX2 20726797 ChIP-Seq SW620 Human | SOX2 |
| 369 | GDA      | Enrichr CHEA_2022: SOX2 20726797 ChIP-Seq SW620 Human | SOX2 |
| 370 | NAPA     | Enrichr CHEA_2022: SOX2 20726797 ChIP-Seq SW620 Human | SOX2 |
| 371 | SCNN1A   | Enrichr CHEA_2022: SOX2 20726797 ChIP-Seq SW620 Human | SOX2 |
| 372 | PRDM1    | Enrichr CHEA_2022: SOX2 20726797 ChIP-Seq SW620 Human | SOX2 |
| 373 | LOXL4    | Enrichr CHEA_2022: SOX2 20726797 ChIP-Seq SW620 Human | SOX2 |
| 374 | LOXL2    | Enrichr CHEA_2022: SOX2 20726797 ChIP-Seq SW620 Human | SOX2 |
| 375 | LOXL3    | Enrichr CHEA_2022: SOX2 20726797 ChIP-Seq SW620 Human | SOX2 |
| 376 | HSD17B1  | Enrichr CHEA_2022: SOX2 20726797 ChIP-Seq SW620 Human | SOX2 |
| 377 | HSD17B2  | Enrichr CHEA_2022: SOX2 20726797 ChIP-Seq SW620 Human | SOX2 |
| 378 | MSX1     | Enrichr CHEA_2022: SOX2 20726797 ChIP-Seq SW620 Human | SOX2 |
| 379 | TBC1D16  | Enrichr CHEA_2022: SOX2 20726797 ChIP-Seq SW620 Human | SOX2 |
| 380 | TBC1D17  | Enrichr CHEA_2022: SOX2 20726797 ChIP-Seq SW620 Human | SOX2 |
| 381 | DENND2D  | Enrichr CHEA_2022: SOX2 20726797 ChIP-Seq SW620 Human | SOX2 |
| 382 | PCYT1B   | Enrichr CHEA_2022: SOX2 20726797 ChIP-Seq SW620 Human | SOX2 |
| 383 | SYT1     | Enrichr CHEA_2022: SOX2 20726797 ChIP-Seq SW620 Human | SOX2 |
| 384 | TIMM44   | Enrichr CHEA_2022: SOX2 20726797 ChIP-Seq SW620 Human | SOX2 |
| 385 | NAT1     | Enrichr CHEA_2022: SOX2 20726797 ChIP-Seq SW620 Human | SOX2 |
| 386 | CCNB1IP1 | Enrichr CHEA_2022: SOX2 20726797 ChIP-Seq SW620 Human | SOX2 |
| 387 | FGF18    | Enrichr CHEA_2022: SOX2 20726797 ChIP-Seq SW620 Human | SOX2 |
| 388 | ZNF91    | Enrichr CHEA_2022: SOX2 20726797 ChIP-Seq SW620 Human | SOX2 |
| 389 | GNB2     | Enrichr CHEA_2022: SOX2 20726797 ChIP-Seq SW620 Human | SOX2 |
| 390 | MKRN2    | Enrichr CHEA_2022: SOX2 20726797 ChIP-Seq SW620 Human | SOX2 |
| 391 | GNB5     | Enrichr CHEA_2022: SOX2 20726797 ChIP-Seq SW620 Human | SOX2 |
| 392 | GNAS     | Enrichr CHEA_2022: SOX2 20726797 ChIP-Seq SW620 Human | SOX2 |
| 393 | MUC20    | Enrichr CHEA_2022: SOX2 20726797 ChIP-Seq SW620 Human | SOX2 |
| 394 | TCF3     | Enrichr CHEA_2022: SOX2 20726797 ChIP-Seq SW620 Human | SOX2 |
| 395 | TSNARE1  | Enrichr CHEA_2022: SOX2 20726797 ChIP-Seq SW620 Human | SOX2 |
| 396 | VIL1     | Enrichr CHEA_2022: SOX2 20726797 ChIP-Seq SW620 Human | SOX2 |
| 397 | DYRK4    | Enrichr CHEA_2022: SOX2 20726797 ChIP-Seq SW620 Human | SOX2 |
| 398 | DYRK3    | Enrichr CHEA_2022: SOX2 20726797 ChIP-Seq SW620 Human | SOX2 |
| 399 | DYRK2    | Enrichr CHEA_2022: SOX2 20726797 ChIP-Seq SW620 Human | SOX2 |
| 400 | SLC41A2  | Enrichr CHEA_2022: SOX2 20726797 ChIP-Seq SW620 Human | SOX2 |
| 401 | PLAU     | Enrichr CHEA_2022: SOX2 20726797 ChIP-Seq SW620 Human | SOX2 |
| 402 | HTRA1    | Enrichr CHEA_2022: SOX2 20726797 ChIP-Seq SW620 Human | SOX2 |
| 403 | ETS1     | Enrichr CHEA_2022: SOX2 20726797 ChIP-Seq SW620 Human | SOX2 |
| 404 | ETS2     | Enrichr CHEA_2022: SOX2 20726797 ChIP-Seq SW620 Human | SOX2 |
| 405 | DAPP1    | Enrichr CHEA_2022: SOX2 20726797 ChIP-Seq SW620 Human | SOX2 |
| 406 | IGF1R    | Enrichr CHEA_2022: SOX2 20726797 ChIP-Seq SW620 Human | SOX2 |
| 407 | TGM2     | Enrichr CHEA_2022: SOX2 20726797 ChIP-Seq SW620 Human | SOX2 |
| 408 | CNN3     | Enrichr CHEA_2022: SOX2 20726797 ChIP-Seq SW620 Human | SOX2 |
| 409 | ARFGEF1  | Enrichr CHEA_2022: SOX2 20726797 ChIP-Seq SW620 Human | SOX2 |
| 410 | GGH      | Enrichr CHEA_2022: SOX2 20726797 ChIP-Seq SW620 Human | SOX2 |
| 411 | CAV1     | Enrichr CHEA_2022: SOX2 20726797 ChIP-Seq SW620 Human | SOX2 |
| 412 | NAV1     | Enrichr CHEA_2022: SOX2 20726797 ChIP-Seq SW620 Human | SOX2 |
| 413 | ETV1     | Enrichr CHEA_2022: SOX2 20726797 ChIP-Seq SW620 Human | SOX2 |
| 414 | NAV2     | Enrichr CHEA_2022: SOX2 20726797 ChIP-Seq SW620 Human | SOX2 |
| 415 | ETV5     | Enrichr CHEA_2022: SOX2 20726797 ChIP-Seq SW620 Human | SOX2 |
| 416 | TTC17    | Enrichr CHEA_2022: SOX2 20726797 ChIP-Seq SW620 Human | SOX2 |
| 417 | ETV6     | Enrichr CHEA_2022: SOX2 20726797 ChIP-Seq SW620 Human | SOX2 |
| 418 | TAPBP    | Enrichr CHEA_2022: SOX2 20726797 ChIP-Seq SW620 Human | SOX2 |
| 419 | EPN3     | Enrichr CHEA_2022: SOX2 20726797 ChIP-Seq SW620 Human | SOX2 |
| 420 | ELF2     | Enrichr CHEA_2022: SOX2 20726797 ChIP-Seq SW620 Human | SOX2 |
| 421 | ELF3     | Enrichr CHEA_2022: SOX2 20726797 ChIP-Seq SW620 Human | SOX2 |
| 422 | MANSC1   | Enrichr CHEA_2022: SOX2 20726797 ChIP-Seq SW620 Human | SOX2 |
| 423 | CUEDC1   | Enrichr CHEA_2022: SOX2 20726797 ChIP-Seq SW620 Human | SOX2 |
| 424 | FBP1     | Enrichr CHEA_2022: SOX2 20726797 ChIP-Seq SW620 Human | SOX2 |
| 425 | SHANK2   | Enrichr CHEA_2022: SOX2 20726797 ChIP-Seq SW620 Human | SOX2 |

|             |                                                       |      |
|-------------|-------------------------------------------------------|------|
| 426 TTC26   | Enrichr CHEA_2022: SOX2 20726797 ChIP-Seq SW620 Human | SOX2 |
| 427 NNMT    | Enrichr CHEA_2022: SOX2 20726797 ChIP-Seq SW620 Human | SOX2 |
| 428 TNFAIP8 | Enrichr CHEA_2022: SOX2 20726797 ChIP-Seq SW620 Human | SOX2 |
| 429 TNFAIP2 | Enrichr CHEA_2022: SOX2 20726797 ChIP-Seq SW620 Human | SOX2 |
| 430 PITPNC1 | Enrichr CHEA_2022: SOX2 20726797 ChIP-Seq SW620 Human | SOX2 |
| 431 AGPAT5  | Enrichr CHEA_2022: SOX2 20726797 ChIP-Seq SW620 Human | SOX2 |
| 432 CA2     | Enrichr CHEA_2022: SOX2 20726797 ChIP-Seq SW620 Human | SOX2 |
| 433 IRAK1   | Enrichr CHEA_2022: SOX2 20726797 ChIP-Seq SW620 Human | SOX2 |
| 434 LPXN    | Enrichr CHEA_2022: SOX2 20726797 ChIP-Seq SW620 Human | SOX2 |
| 435 ATF7IP  | Enrichr CHEA_2022: SOX2 20726797 ChIP-Seq SW620 Human | SOX2 |
| 436 DAPK1   | Enrichr CHEA_2022: SOX2 20726797 ChIP-Seq SW620 Human | SOX2 |
| 437 ERCC1   | Enrichr CHEA_2022: SOX2 20726797 ChIP-Seq SW620 Human | SOX2 |
| 438 GALE    | Enrichr CHEA_2022: SOX2 20726797 ChIP-Seq SW620 Human | SOX2 |
| 439 KRAS    | Enrichr CHEA_2022: SOX2 20726797 ChIP-Seq SW620 Human | SOX2 |
| 440 TRIB2   | Enrichr CHEA_2022: SOX2 20726797 ChIP-Seq SW620 Human | SOX2 |
| 441 TRIB3   | Enrichr CHEA_2022: SOX2 20726797 ChIP-Seq SW620 Human | SOX2 |
| 442 SIGIRR  | Enrichr CHEA_2022: SOX2 20726797 ChIP-Seq SW620 Human | SOX2 |
| 443 TRIB1   | Enrichr CHEA_2022: SOX2 20726797 ChIP-Seq SW620 Human | SOX2 |
| 444 RND3    | Enrichr CHEA_2022: SOX2 20726797 ChIP-Seq SW620 Human | SOX2 |
| 445 NR3C1   | Enrichr CHEA_2022: SOX2 20726797 ChIP-Seq SW620 Human | SOX2 |
| 446 POLD4   | Enrichr CHEA_2022: SOX2 20726797 ChIP-Seq SW620 Human | SOX2 |
| 447 ACOXL   | Enrichr CHEA_2022: SOX2 20726797 ChIP-Seq SW620 Human | SOX2 |
| 448 OXCT1   | Enrichr CHEA_2022: SOX2 20726797 ChIP-Seq SW620 Human | SOX2 |
| 449 DIP2C   | Enrichr CHEA_2022: SOX2 20726797 ChIP-Seq SW620 Human | SOX2 |
| 450 HOMER3  | Enrichr CHEA_2022: SOX2 20726797 ChIP-Seq SW620 Human | SOX2 |
| 451 PCGF6   | Enrichr CHEA_2022: SOX2 20726797 ChIP-Seq SW620 Human | SOX2 |
| 452 HUS1    | Enrichr CHEA_2022: SOX2 20726797 ChIP-Seq SW620 Human | SOX2 |
| 453 NUP93   | Enrichr CHEA_2022: SOX2 20726797 ChIP-Seq SW620 Human | SOX2 |
| 454 CAPN12  | Enrichr CHEA_2022: SOX2 20726797 ChIP-Seq SW620 Human | SOX2 |
| 455 DEPDC1B | Enrichr CHEA_2022: SOX2 20726797 ChIP-Seq SW620 Human | SOX2 |
| 456 TEF     | Enrichr CHEA_2022: SOX2 20726797 ChIP-Seq SW620 Human | SOX2 |
| 457 RALB    | Enrichr CHEA_2022: SOX2 20726797 ChIP-Seq SW620 Human | SOX2 |
| 458 ZNF395  | Enrichr CHEA_2022: SOX2 20726797 ChIP-Seq SW620 Human | SOX2 |
| 459 ADARB1  | Enrichr CHEA_2022: SOX2 20726797 ChIP-Seq SW620 Human | SOX2 |
| 460 GLS     | Enrichr CHEA_2022: SOX2 20726797 ChIP-Seq SW620 Human | SOX2 |
| 461 ASCL2   | Enrichr CHEA_2022: SOX2 20726797 ChIP-Seq SW620 Human | SOX2 |
| 462 ADCY7   | Enrichr CHEA_2022: SOX2 20726797 ChIP-Seq SW620 Human | SOX2 |
| 463 GNG2    | Enrichr CHEA_2022: SOX2 20726797 ChIP-Seq SW620 Human | SOX2 |
| 464 APOL6   | Enrichr CHEA_2022: SOX2 20726797 ChIP-Seq SW620 Human | SOX2 |
| 465 GNG4    | Enrichr CHEA_2022: SOX2 20726797 ChIP-Seq SW620 Human | SOX2 |
| 466 FLRT3   | Enrichr CHEA_2022: SOX2 20726797 ChIP-Seq SW620 Human | SOX2 |
| 467 WDR72   | Enrichr CHEA_2022: SOX2 20726797 ChIP-Seq SW620 Human | SOX2 |
| 468 ALOX5   | Enrichr CHEA_2022: SOX2 20726797 ChIP-Seq SW620 Human | SOX2 |
| 469 ST3GAL5 | Enrichr CHEA_2022: SOX2 20726797 ChIP-Seq SW620 Human | SOX2 |
| 470 PRSS8   | Enrichr CHEA_2022: SOX2 20726797 ChIP-Seq SW620 Human | SOX2 |
| 471 LUC7L   | Enrichr CHEA_2022: SOX2 20726797 ChIP-Seq SW620 Human | SOX2 |
| 472 NUP88   | Enrichr CHEA_2022: SOX2 20726797 ChIP-Seq SW620 Human | SOX2 |
| 473 ST3GAL1 | Enrichr CHEA_2022: SOX2 20726797 ChIP-Seq SW620 Human | SOX2 |
| 474 PRSS3   | Enrichr CHEA_2022: SOX2 20726797 ChIP-Seq SW620 Human | SOX2 |
| 475 APOL1   | Enrichr CHEA_2022: SOX2 20726797 ChIP-Seq SW620 Human | SOX2 |
| 476 FDFT1   | Enrichr CHEA_2022: SOX2 20726797 ChIP-Seq SW620 Human | SOX2 |
| 477 ST3GAL4 | Enrichr CHEA_2022: SOX2 20726797 ChIP-Seq SW620 Human | SOX2 |
| 478 TAF9B   | Enrichr CHEA_2022: SOX2 20726797 ChIP-Seq SW620 Human | SOX2 |
| 479 PRKCH   | Enrichr CHEA_2022: SOX2 20726797 ChIP-Seq SW620 Human | SOX2 |
| 480 NDFIP1  | Enrichr CHEA_2022: SOX2 20726797 ChIP-Seq SW620 Human | SOX2 |
| 481 PHC3    | Enrichr CHEA_2022: SOX2 20726797 ChIP-Seq SW620 Human | SOX2 |
| 482 ICMT    | Enrichr CHEA_2022: SOX2 20726797 ChIP-Seq SW620 Human | SOX2 |
| 483 WDR59   | Enrichr CHEA_2022: SOX2 20726797 ChIP-Seq SW620 Human | SOX2 |
| 484 STARD13 | Enrichr CHEA_2022: SOX2 20726797 ChIP-Seq SW620 Human | SOX2 |
| 485 STARD10 | Enrichr CHEA_2022: SOX2 20726797 ChIP-Seq SW620 Human | SOX2 |
| 486 PLK2    | Enrichr CHEA_2022: SOX2 20726797 ChIP-Seq SW620 Human | SOX2 |

|              |                                                       |      |
|--------------|-------------------------------------------------------|------|
| 487 PRKCE    | Enrichr CHEA_2022: SOX2 20726797 ChIP-Seq SW620 Human | SOX2 |
| 488 PARD3    | Enrichr CHEA_2022: SOX2 20726797 ChIP-Seq SW620 Human | SOX2 |
| 489 PRKCA    | Enrichr CHEA_2022: SOX2 20726797 ChIP-Seq SW620 Human | SOX2 |
| 490 TERF2    | Enrichr CHEA_2022: SOX2 20726797 ChIP-Seq SW620 Human | SOX2 |
| 491 ELL2     | Enrichr CHEA_2022: SOX2 20726797 ChIP-Seq SW620 Human | SOX2 |
| 492 ELL3     | Enrichr CHEA_2022: SOX2 20726797 ChIP-Seq SW620 Human | SOX2 |
| 493 COQ10A   | Enrichr CHEA_2022: SOX2 20726797 ChIP-Seq SW620 Human | SOX2 |
| 494 EHD2     | Enrichr CHEA_2022: SOX2 20726797 ChIP-Seq SW620 Human | SOX2 |
| 495 SQLE     | Enrichr CHEA_2022: SOX2 20726797 ChIP-Seq SW620 Human | SOX2 |
| 496 GJB3     | Enrichr CHEA_2022: SOX2 20726797 ChIP-Seq SW620 Human | SOX2 |
| 497 GJB2     | Enrichr CHEA_2022: SOX2 20726797 ChIP-Seq SW620 Human | SOX2 |
| 498 TCN1     | Enrichr CHEA_2022: SOX2 20726797 ChIP-Seq SW620 Human | SOX2 |
| 499 SNAI2    | Enrichr CHEA_2022: SOX2 20726797 ChIP-Seq SW620 Human | SOX2 |
| 500 PRKD2    | Enrichr CHEA_2022: SOX2 20726797 ChIP-Seq SW620 Human | SOX2 |
| 501 GNE      | Enrichr CHEA_2022: SOX2 20726797 ChIP-Seq SW620 Human | SOX2 |
| 502 CFB      | Enrichr CHEA_2022: SOX2 20726797 ChIP-Seq SW620 Human | SOX2 |
| 503 FANK1    | Enrichr CHEA_2022: SOX2 20726797 ChIP-Seq SW620 Human | SOX2 |
| 504 CFH      | Enrichr CHEA_2022: SOX2 20726797 ChIP-Seq SW620 Human | SOX2 |
| 505 PHYHIPL  | Enrichr CHEA_2022: SOX2 20726797 ChIP-Seq SW620 Human | SOX2 |
| 506 GNS      | Enrichr CHEA_2022: SOX2 20726797 ChIP-Seq SW620 Human | SOX2 |
| 507 ELK3     | Enrichr CHEA_2022: SOX2 20726797 ChIP-Seq SW620 Human | SOX2 |
| 508 PLAC8    | Enrichr CHEA_2022: SOX2 20726797 ChIP-Seq SW620 Human | SOX2 |
| 509 NUP62    | Enrichr CHEA_2022: SOX2 20726797 ChIP-Seq SW620 Human | SOX2 |
| 510 AP1S3    | Enrichr CHEA_2022: SOX2 20726797 ChIP-Seq SW620 Human | SOX2 |
| 511 CEP72    | Enrichr CHEA_2022: SOX2 20726797 ChIP-Seq SW620 Human | SOX2 |
| 512 AP1S2    | Enrichr CHEA_2022: SOX2 20726797 ChIP-Seq SW620 Human | SOX2 |
| 513 PROM2    | Enrichr CHEA_2022: SOX2 20726797 ChIP-Seq SW620 Human | SOX2 |
| 514 PROM1    | Enrichr CHEA_2022: SOX2 20726797 ChIP-Seq SW620 Human | SOX2 |
| 515 ZNF367   | Enrichr CHEA_2022: SOX2 20726797 ChIP-Seq SW620 Human | SOX2 |
| 516 SHPRH    | Enrichr CHEA_2022: SOX2 20726797 ChIP-Seq SW620 Human | SOX2 |
| 517 PHF10    | Enrichr CHEA_2022: SOX2 20726797 ChIP-Seq SW620 Human | SOX2 |
| 518 PHF13    | Enrichr CHEA_2022: SOX2 20726797 ChIP-Seq SW620 Human | SOX2 |
| 519 GRTP1    | Enrichr CHEA_2022: SOX2 20726797 ChIP-Seq SW620 Human | SOX2 |
| 520 CGN      | Enrichr CHEA_2022: SOX2 20726797 ChIP-Seq SW620 Human | SOX2 |
| 521 TCP1     | Enrichr CHEA_2022: SOX2 20726797 ChIP-Seq SW620 Human | SOX2 |
| 522 NFATC3   | Enrichr CHEA_2022: SOX2 20726797 ChIP-Seq SW620 Human | SOX2 |
| 523 ASH1L    | Enrichr CHEA_2022: SOX2 20726797 ChIP-Seq SW620 Human | SOX2 |
| 524 WDR35    | Enrichr CHEA_2022: SOX2 20726797 ChIP-Seq SW620 Human | SOX2 |
| 525 TUBB2B   | Enrichr CHEA_2022: SOX2 20726797 ChIP-Seq SW620 Human | SOX2 |
| 526 HLA-DQB1 | Enrichr CHEA_2022: SOX2 20726797 ChIP-Seq SW620 Human | SOX2 |
| 527 PHF14    | Enrichr CHEA_2022: SOX2 20726797 ChIP-Seq SW620 Human | SOX2 |
| 528 RARA     | Enrichr CHEA_2022: SOX2 20726797 ChIP-Seq SW620 Human | SOX2 |
| 529 MGLL     | Enrichr CHEA_2022: SOX2 20726797 ChIP-Seq SW620 Human | SOX2 |
| 530 GAS6     | Enrichr CHEA_2022: SOX2 20726797 ChIP-Seq SW620 Human | SOX2 |
| 531 BTG3     | Enrichr CHEA_2022: SOX2 20726797 ChIP-Seq SW620 Human | SOX2 |
| 532 BTG2     | Enrichr CHEA_2022: SOX2 20726797 ChIP-Seq SW620 Human | SOX2 |
| 533 BTG1     | Enrichr CHEA_2022: SOX2 20726797 ChIP-Seq SW620 Human | SOX2 |
| 534 PRDM11   | Enrichr CHEA_2022: SOX2 20726797 ChIP-Seq SW620 Human | SOX2 |
| 535 TIMP4    | Enrichr CHEA_2022: SOX2 20726797 ChIP-Seq SW620 Human | SOX2 |
| 536 PBK      | Enrichr CHEA_2022: SOX2 20726797 ChIP-Seq SW620 Human | SOX2 |
| 537 PLLP     | Enrichr CHEA_2022: SOX2 20726797 ChIP-Seq SW620 Human | SOX2 |
| 538 TIMP2    | Enrichr CHEA_2022: SOX2 20726797 ChIP-Seq SW620 Human | SOX2 |
| 539 TEAD2    | Enrichr CHEA_2022: SOX2 20726797 ChIP-Seq SW620 Human | SOX2 |
| 540 TEAD3    | Enrichr CHEA_2022: SOX2 20726797 ChIP-Seq SW620 Human | SOX2 |
| 541 AP1M2    | Enrichr CHEA_2022: SOX2 20726797 ChIP-Seq SW620 Human | SOX2 |
| 542 TEAD4    | Enrichr CHEA_2022: SOX2 20726797 ChIP-Seq SW620 Human | SOX2 |
| 543 CEP57    | Enrichr CHEA_2022: SOX2 20726797 ChIP-Seq SW620 Human | SOX2 |
| 544 FARP2    | Enrichr CHEA_2022: SOX2 20726797 ChIP-Seq SW620 Human | SOX2 |
| 545 CDKN2C   | Enrichr CHEA_2022: SOX2 20726797 ChIP-Seq SW620 Human | SOX2 |
| 546 MBNL2    | Enrichr CHEA_2022: SOX2 20726797 ChIP-Seq SW620 Human | SOX2 |
| 547 YTHDF3   | Enrichr CHEA_2022: SOX2 20726797 ChIP-Seq SW620 Human | SOX2 |

|              |                                                       |      |
|--------------|-------------------------------------------------------|------|
| 548 MGMT     | Enrichr CHEA_2022: SOX2 20726797 ChIP-Seq SW620 Human | SOX2 |
| 549 CDKN2B   | Enrichr CHEA_2022: SOX2 20726797 ChIP-Seq SW620 Human | SOX2 |
| 550 G0S2     | Enrichr CHEA_2022: SOX2 20726797 ChIP-Seq SW620 Human | SOX2 |
| 551 NR1H3    | Enrichr CHEA_2022: SOX2 20726797 ChIP-Seq SW620 Human | SOX2 |
| 552 ELP3     | Enrichr CHEA_2022: SOX2 20726797 ChIP-Seq SW620 Human | SOX2 |
| 553 NFIA     | Enrichr CHEA_2022: SOX2 20726797 ChIP-Seq SW620 Human | SOX2 |
| 554 DHRS2    | Enrichr CHEA_2022: SOX2 20726797 ChIP-Seq SW620 Human | SOX2 |
| 555 DHRS3    | Enrichr CHEA_2022: SOX2 20726797 ChIP-Seq SW620 Human | SOX2 |
| 556 FARP1    | Enrichr CHEA_2022: SOX2 20726797 ChIP-Seq SW620 Human | SOX2 |
| 557 ZNF33B   | Enrichr CHEA_2022: SOX2 20726797 ChIP-Seq SW620 Human | SOX2 |
| 558 DHRS9    | Enrichr CHEA_2022: SOX2 20726797 ChIP-Seq SW620 Human | SOX2 |
| 559 NFIB     | Enrichr CHEA_2022: SOX2 20726797 ChIP-Seq SW620 Human | SOX2 |
| 560 PLEKHO1  | Enrichr CHEA_2022: SOX2 20726797 ChIP-Seq SW620 Human | SOX2 |
| 561 SMOC2    | Enrichr CHEA_2022: SOX2 20726797 ChIP-Seq SW620 Human | SOX2 |
| 562 MAP1B    | Enrichr CHEA_2022: SOX2 20726797 ChIP-Seq SW620 Human | SOX2 |
| 563 NUCB2    | Enrichr CHEA_2022: SOX2 20726797 ChIP-Seq SW620 Human | SOX2 |
| 564 ZNF331   | Enrichr CHEA_2022: SOX2 20726797 ChIP-Seq SW620 Human | SOX2 |
| 565 PHF6     | Enrichr CHEA_2022: SOX2 20726797 ChIP-Seq SW620 Human | SOX2 |
| 566 CDKN1C   | Enrichr CHEA_2022: SOX2 20726797 ChIP-Seq SW620 Human | SOX2 |
| 567 GRN      | Enrichr CHEA_2022: SOX2 20726797 ChIP-Seq SW620 Human | SOX2 |
| 568 PYGB     | Enrichr CHEA_2022: SOX2 20726797 ChIP-Seq SW620 Human | SOX2 |
| 569 SETD7    | Enrichr CHEA_2022: SOX2 20726797 ChIP-Seq SW620 Human | SOX2 |
| 570 PYGL     | Enrichr CHEA_2022: SOX2 20726797 ChIP-Seq SW620 Human | SOX2 |
| 571 STON2    | Enrichr CHEA_2022: SOX2 20726797 ChIP-Seq SW620 Human | SOX2 |
| 572 PDF      | Enrichr CHEA_2022: SOX2 20726797 ChIP-Seq SW620 Human | SOX2 |
| 573 PPP1R2   | Enrichr CHEA_2022: SOX2 20726797 ChIP-Seq SW620 Human | SOX2 |
| 574 UBL3     | Enrichr CHEA_2022: SOX2 20726797 ChIP-Seq SW620 Human | SOX2 |
| 575 ASH2L    | Enrichr CHEA_2022: SOX2 20726797 ChIP-Seq SW620 Human | SOX2 |
| 576 CKB      | Enrichr CHEA_2022: SOX2 20726797 ChIP-Seq SW620 Human | SOX2 |
| 577 SLC17A5  | Enrichr CHEA_2022: SOX2 20726797 ChIP-Seq SW620 Human | SOX2 |
| 578 GSN      | Enrichr CHEA_2022: SOX2 20726797 ChIP-Seq SW620 Human | SOX2 |
| 579 TLE4     | Enrichr CHEA_2022: SOX2 20726797 ChIP-Seq SW620 Human | SOX2 |
| 580 TLE1     | Enrichr CHEA_2022: SOX2 20726797 ChIP-Seq SW620 Human | SOX2 |
| 581 TPM2     | Enrichr CHEA_2022: SOX2 20726797 ChIP-Seq SW620 Human | SOX2 |
| 582 VRK2     | Enrichr CHEA_2022: SOX2 20726797 ChIP-Seq SW620 Human | SOX2 |
| 583 VRK3     | Enrichr CHEA_2022: SOX2 20726797 ChIP-Seq SW620 Human | SOX2 |
| 584 HIPK2    | Enrichr CHEA_2022: SOX2 20726797 ChIP-Seq SW620 Human | SOX2 |
| 585 RAB30    | Enrichr CHEA_2022: SOX2 20726797 ChIP-Seq SW620 Human | SOX2 |
| 586 NRBP2    | Enrichr CHEA_2022: SOX2 20726797 ChIP-Seq SW620 Human | SOX2 |
| 587 FAM91A1  | Enrichr CHEA_2022: SOX2 20726797 ChIP-Seq SW620 Human | SOX2 |
| 588 SLC7A6OS | Enrichr CHEA_2022: SOX2 20726797 ChIP-Seq SW620 Human | SOX2 |
| 589 RAB31    | Enrichr CHEA_2022: SOX2 20726797 ChIP-Seq SW620 Human | SOX2 |
| 590 PSAT1    | Enrichr CHEA_2022: SOX2 20726797 ChIP-Seq SW620 Human | SOX2 |
| 591 PLXNB2   | Enrichr CHEA_2022: SOX2 20726797 ChIP-Seq SW620 Human | SOX2 |
| 592 CSPG5    | Enrichr CHEA_2022: SOX2 20726797 ChIP-Seq SW620 Human | SOX2 |
| 593 CNIH3    | Enrichr CHEA_2022: SOX2 20726797 ChIP-Seq SW620 Human | SOX2 |
| 594 TCTA     | Enrichr CHEA_2022: SOX2 20726797 ChIP-Seq SW620 Human | SOX2 |
| 595 PPIL4    | Enrichr CHEA_2022: SOX2 20726797 ChIP-Seq SW620 Human | SOX2 |
| 596 FKBP7    | Enrichr CHEA_2022: SOX2 20726797 ChIP-Seq SW620 Human | SOX2 |
| 597 GOLGA8A  | Enrichr CHEA_2022: SOX2 20726797 ChIP-Seq SW620 Human | SOX2 |
| 598 GTF2I    | Enrichr CHEA_2022: SOX2 20726797 ChIP-Seq SW620 Human | SOX2 |
| 599 RNMT     | Enrichr CHEA_2022: SOX2 20726797 ChIP-Seq SW620 Human | SOX2 |
| 600 PROS1    | Enrichr CHEA_2022: SOX2 20726797 ChIP-Seq SW620 Human | SOX2 |
| 601 TCEAL1   | Enrichr CHEA_2022: SOX2 20726797 ChIP-Seq SW620 Human | SOX2 |
| 602 PAPSS1   | Enrichr CHEA_2022: SOX2 20726797 ChIP-Seq SW620 Human | SOX2 |
| 603 PAPSS2   | Enrichr CHEA_2022: SOX2 20726797 ChIP-Seq SW620 Human | SOX2 |
| 604 FGD5     | Enrichr CHEA_2022: SOX2 20726797 ChIP-Seq SW620 Human | SOX2 |
| 605 TCEAL8   | Enrichr CHEA_2022: SOX2 20726797 ChIP-Seq SW620 Human | SOX2 |
| 606 ABLIM1   | Enrichr CHEA_2022: SOX2 20726797 ChIP-Seq SW620 Human | SOX2 |
| 607 ABLIM3   | Enrichr CHEA_2022: SOX2 20726797 ChIP-Seq SW620 Human | SOX2 |
| 608 CLCC1    | Enrichr CHEA_2022: SOX2 20726797 ChIP-Seq SW620 Human | SOX2 |

|              |                                                       |      |
|--------------|-------------------------------------------------------|------|
| 609 TCEAL4   | Enrichr CHEA_2022: SOX2 20726797 ChIP-Seq SW620 Human | SOX2 |
| 610 RAB25    | Enrichr CHEA_2022: SOX2 20726797 ChIP-Seq SW620 Human | SOX2 |
| 611 SLC39A6  | Enrichr CHEA_2022: SOX2 20726797 ChIP-Seq SW620 Human | SOX2 |
| 612 TXNL4B   | Enrichr CHEA_2022: SOX2 20726797 ChIP-Seq SW620 Human | SOX2 |
| 613 ZNF302   | Enrichr CHEA_2022: SOX2 20726797 ChIP-Seq SW620 Human | SOX2 |
| 614 SIAE     | Enrichr CHEA_2022: SOX2 20726797 ChIP-Seq SW620 Human | SOX2 |
| 615 KCMF1    | Enrichr CHEA_2022: SOX2 20726797 ChIP-Seq SW620 Human | SOX2 |
| 616 SERF1A   | Enrichr CHEA_2022: SOX2 20726797 ChIP-Seq SW620 Human | SOX2 |
| 617 TRAPPC2  | Enrichr CHEA_2022: SOX2 20726797 ChIP-Seq SW620 Human | SOX2 |
| 618 OSBPL5   | Enrichr CHEA_2022: SOX2 20726797 ChIP-Seq SW620 Human | SOX2 |
| 619 FRMD4B   | Enrichr CHEA_2022: SOX2 20726797 ChIP-Seq SW620 Human | SOX2 |
| 620 TFDP1    | Enrichr CHEA_2022: SOX2 20726797 ChIP-Seq SW620 Human | SOX2 |
| 621 FRMD4A   | Enrichr CHEA_2022: SOX2 20726797 ChIP-Seq SW620 Human | SOX2 |
| 622 TPP2     | Enrichr CHEA_2022: SOX2 20726797 ChIP-Seq SW620 Human | SOX2 |
| 623 LHX6     | Enrichr CHEA_2022: SOX2 20726797 ChIP-Seq SW620 Human | SOX2 |
| 624 RAB3D    | Enrichr CHEA_2022: SOX2 20726797 ChIP-Seq SW620 Human | SOX2 |
| 625 SLC26A2  | Enrichr CHEA_2022: SOX2 20726797 ChIP-Seq SW620 Human | SOX2 |
| 626 CBFB     | Enrichr CHEA_2022: SOX2 20726797 ChIP-Seq SW620 Human | SOX2 |
| 627 NPEPPS   | Enrichr CHEA_2022: SOX2 20726797 ChIP-Seq SW620 Human | SOX2 |
| 628 CDC14B   | Enrichr CHEA_2022: SOX2 20726797 ChIP-Seq SW620 Human | SOX2 |
| 629 TM7SF2   | Enrichr CHEA_2022: SOX2 20726797 ChIP-Seq SW620 Human | SOX2 |
| 630 TM7SF3   | Enrichr CHEA_2022: SOX2 20726797 ChIP-Seq SW620 Human | SOX2 |
| 631 PLXNA3   | Enrichr CHEA_2022: SOX2 20726797 ChIP-Seq SW620 Human | SOX2 |
| 632 PI3      | Enrichr CHEA_2022: SOX2 20726797 ChIP-Seq SW620 Human | SOX2 |
| 633 PLXNA2   | Enrichr CHEA_2022: SOX2 20726797 ChIP-Seq SW620 Human | SOX2 |
| 634 PAPOLA   | Enrichr CHEA_2022: SOX2 20726797 ChIP-Seq SW620 Human | SOX2 |
| 635 PLXNA1   | Enrichr CHEA_2022: SOX2 20726797 ChIP-Seq SW620 Human | SOX2 |
| 636 PLS3     | Enrichr CHEA_2022: SOX2 20726797 ChIP-Seq SW620 Human | SOX2 |
| 637 MAP2K6   | Enrichr CHEA_2022: SOX2 20726797 ChIP-Seq SW620 Human | SOX2 |
| 638 CDADC1   | Enrichr CHEA_2022: SOX2 20726797 ChIP-Seq SW620 Human | SOX2 |
| 639 RFC4     | Enrichr CHEA_2022: SOX2 20726797 ChIP-Seq SW620 Human | SOX2 |
| 640 XCL1     | Enrichr CHEA_2022: SOX2 20726797 ChIP-Seq SW620 Human | SOX2 |
| 641 KBTBD11  | Enrichr CHEA_2022: SOX2 20726797 ChIP-Seq SW620 Human | SOX2 |
| 642 IRAK1BP1 | Enrichr CHEA_2022: SOX2 20726797 ChIP-Seq SW620 Human | SOX2 |
| 643 DAB2     | Enrichr CHEA_2022: SOX2 20726797 ChIP-Seq SW620 Human | SOX2 |
| 644 MFAP2    | Enrichr CHEA_2022: SOX2 20726797 ChIP-Seq SW620 Human | SOX2 |
| 645 ESPL1    | Enrichr CHEA_2022: SOX2 20726797 ChIP-Seq SW620 Human | SOX2 |
| 646 BCL6     | Enrichr CHEA_2022: SOX2 20726797 ChIP-Seq SW620 Human | SOX2 |
| 647 DNAJC6   | Enrichr CHEA_2022: SOX2 20726797 ChIP-Seq SW620 Human | SOX2 |
| 648 DNAJC5   | Enrichr CHEA_2022: SOX2 20726797 ChIP-Seq SW620 Human | SOX2 |
| 649 PIR      | Enrichr CHEA_2022: SOX2 20726797 ChIP-Seq SW620 Human | SOX2 |
| 650 XCL2     | Enrichr CHEA_2022: SOX2 20726797 ChIP-Seq SW620 Human | SOX2 |
| 651 LAT      | Enrichr CHEA_2022: SOX2 20726797 ChIP-Seq SW620 Human | SOX2 |
| 652 BMPR2    | Enrichr CHEA_2022: SOX2 20726797 ChIP-Seq SW620 Human | SOX2 |
| 653 CCDC25   | Enrichr CHEA_2022: SOX2 20726797 ChIP-Seq SW620 Human | SOX2 |
| 654 HMMR     | Enrichr CHEA_2022: SOX2 20726797 ChIP-Seq SW620 Human | SOX2 |
| 655 ZC3H8    | Enrichr CHEA_2022: SOX2 20726797 ChIP-Seq SW620 Human | SOX2 |
| 656 UBR1     | Enrichr CHEA_2022: SOX2 20726797 ChIP-Seq SW620 Human | SOX2 |
| 657 CYP3A5   | Enrichr CHEA_2022: SOX2 20726797 ChIP-Seq SW620 Human | SOX2 |
| 658 CYP3A7   | Enrichr CHEA_2022: SOX2 20726797 ChIP-Seq SW620 Human | SOX2 |
| 659 LBH      | Enrichr CHEA_2022: SOX2 20726797 ChIP-Seq SW620 Human | SOX2 |
| 660 PSTPIP2  | Enrichr CHEA_2022: SOX2 20726797 ChIP-Seq SW620 Human | SOX2 |
| 661 P2RY2    | Enrichr CHEA_2022: SOX2 20726797 ChIP-Seq SW620 Human | SOX2 |
| 662 DVL2     | Enrichr CHEA_2022: SOX2 20726797 ChIP-Seq SW620 Human | SOX2 |
| 663 PHACTR3  | Enrichr CHEA_2022: SOX2 20726797 ChIP-Seq SW620 Human | SOX2 |
| 664 PHACTR2  | Enrichr CHEA_2022: SOX2 20726797 ChIP-Seq SW620 Human | SOX2 |
| 665 DNAJB9   | Enrichr CHEA_2022: SOX2 20726797 ChIP-Seq SW620 Human | SOX2 |
| 666 SERAC1   | Enrichr CHEA_2022: SOX2 20726797 ChIP-Seq SW620 Human | SOX2 |
| 667 EMILIN2  | Enrichr CHEA_2022: SOX2 20726797 ChIP-Seq SW620 Human | SOX2 |
| 668 CCDC34   | Enrichr CHEA_2022: SOX2 20726797 ChIP-Seq SW620 Human | SOX2 |
| 669 TPPP     | Enrichr CHEA_2022: SOX2 20726797 ChIP-Seq SW620 Human | SOX2 |

|              |                                                       |      |
|--------------|-------------------------------------------------------|------|
| 670 CEP170   | Enrichr CHEA_2022: SOX2 20726797 ChIP-Seq SW620 Human | SOX2 |
| 671 ADSL     | Enrichr CHEA_2022: SOX2 20726797 ChIP-Seq SW620 Human | SOX2 |
| 672 PLEKHG6  | Enrichr CHEA_2022: SOX2 20726797 ChIP-Seq SW620 Human | SOX2 |
| 673 KRR1     | Enrichr CHEA_2022: SOX2 20726797 ChIP-Seq SW620 Human | SOX2 |
| 674 COBL     | Enrichr CHEA_2022: SOX2 20726797 ChIP-Seq SW620 Human | SOX2 |
| 675 FBXL16   | Enrichr CHEA_2022: SOX2 20726797 ChIP-Seq SW620 Human | SOX2 |
| 676 LEMD1    | Enrichr CHEA_2022: SOX2 20726797 ChIP-Seq SW620 Human | SOX2 |
| 677 LCK      | Enrichr CHEA_2022: SOX2 20726797 ChIP-Seq SW620 Human | SOX2 |
| 678 P2RX5    | Enrichr CHEA_2022: SOX2 20726797 ChIP-Seq SW620 Human | SOX2 |
| 679 RAB15    | Enrichr CHEA_2022: SOX2 20726797 ChIP-Seq SW620 Human | SOX2 |
| 680 APOC1    | Enrichr CHEA_2022: SOX2 20726797 ChIP-Seq SW620 Human | SOX2 |
| 681 KIAA0586 | Enrichr CHEA_2022: SOX2 20726797 ChIP-Seq SW620 Human | SOX2 |
| 682 DNAJA4   | Enrichr CHEA_2022: SOX2 20726797 ChIP-Seq SW620 Human | SOX2 |
| 683 POLR1D   | Enrichr CHEA_2022: SOX2 20726797 ChIP-Seq SW620 Human | SOX2 |
| 684 APOC2    | Enrichr CHEA_2022: SOX2 20726797 ChIP-Seq SW620 Human | SOX2 |
| 685 POLR1E   | Enrichr CHEA_2022: SOX2 20726797 ChIP-Seq SW620 Human | SOX2 |
| 686 CCDC66   | Enrichr CHEA_2022: SOX2 20726797 ChIP-Seq SW620 Human | SOX2 |
| 687 PLEKHG1  | Enrichr CHEA_2022: SOX2 20726797 ChIP-Seq SW620 Human | SOX2 |
| 688 HDAC4    | Enrichr CHEA_2022: SOX2 20726797 ChIP-Seq SW620 Human | SOX2 |
| 689 CEBPD    | Enrichr CHEA_2022: SOX2 20726797 ChIP-Seq SW620 Human | SOX2 |
| 690 MCM8     | Enrichr CHEA_2022: SOX2 20726797 ChIP-Seq SW620 Human | SOX2 |
| 691 WDR4     | Enrichr CHEA_2022: SOX2 20726797 ChIP-Seq SW620 Human | SOX2 |
| 692 TTL      | Enrichr CHEA_2022: SOX2 20726797 ChIP-Seq SW620 Human | SOX2 |
| 693 THSD1    | Enrichr CHEA_2022: SOX2 20726797 ChIP-Seq SW620 Human | SOX2 |
| 694 NOB1     | Enrichr CHEA_2022: SOX2 20726797 ChIP-Seq SW620 Human | SOX2 |
| 695 TTK      | Enrichr CHEA_2022: SOX2 20726797 ChIP-Seq SW620 Human | SOX2 |
| 696 HDAC9    | Enrichr CHEA_2022: SOX2 20726797 ChIP-Seq SW620 Human | SOX2 |
| 697 SYNE2    | Enrichr CHEA_2022: SOX2 20726797 ChIP-Seq SW620 Human | SOX2 |
| 698 THSD4    | Enrichr CHEA_2022: SOX2 20726797 ChIP-Seq SW620 Human | SOX2 |
| 699 SCR2     | Enrichr CHEA_2022: SOX2 20726797 ChIP-Seq SW620 Human | SOX2 |
| 700 SCR3     | Enrichr CHEA_2022: SOX2 20726797 ChIP-Seq SW620 Human | SOX2 |
| 701 UGT1A6   | Enrichr CHEA_2022: SOX2 20726797 ChIP-Seq SW620 Human | SOX2 |
| 702 CCDC51   | Enrichr CHEA_2022: SOX2 20726797 ChIP-Seq SW620 Human | SOX2 |
| 703 UGT1A8   | Enrichr CHEA_2022: SOX2 20726797 ChIP-Seq SW620 Human | SOX2 |
| 704 IFRD1    | Enrichr CHEA_2022: SOX2 20726797 ChIP-Seq SW620 Human | SOX2 |
| 705 IL1R2    | Enrichr CHEA_2022: SOX2 20726797 ChIP-Seq SW620 Human | SOX2 |
| 706 KRT7     | Enrichr CHEA_2022: SOX2 20726797 ChIP-Seq SW620 Human | SOX2 |
| 707 CRNKL1   | Enrichr CHEA_2022: SOX2 20726797 ChIP-Seq SW620 Human | SOX2 |
| 708 IL23A    | Enrichr CHEA_2022: SOX2 20726797 ChIP-Seq SW620 Human | SOX2 |
| 709 KATNAL1  | Enrichr CHEA_2022: SOX2 20726797 ChIP-Seq SW620 Human | SOX2 |
| 710 NEIL2    | Enrichr CHEA_2022: SOX2 20726797 ChIP-Seq SW620 Human | SOX2 |
| 711 OBSL1    | Enrichr CHEA_2022: SOX2 20726797 ChIP-Seq SW620 Human | SOX2 |
| 712 DCP1B    | Enrichr CHEA_2022: SOX2 20726797 ChIP-Seq SW620 Human | SOX2 |
| 713 IFITM1   | Enrichr CHEA_2022: SOX2 20726797 ChIP-Seq SW620 Human | SOX2 |
| 714 CBLC     | Enrichr CHEA_2022: SOX2 20726797 ChIP-Seq SW620 Human | SOX2 |
| 715 CALML4   | Enrichr CHEA_2022: SOX2 20726797 ChIP-Seq SW620 Human | SOX2 |
| 716 AQP5     | Enrichr CHEA_2022: SOX2 20726797 ChIP-Seq SW620 Human | SOX2 |
| 717 AQP3     | Enrichr CHEA_2022: SOX2 20726797 ChIP-Seq SW620 Human | SOX2 |
| 718 APCDD1   | Enrichr CHEA_2022: SOX2 20726797 ChIP-Seq SW620 Human | SOX2 |
| 719 MTHFD1L  | Enrichr CHEA_2022: SOX2 20726797 ChIP-Seq SW620 Human | SOX2 |
| 720 STXBP6   | Enrichr CHEA_2022: SOX2 20726797 ChIP-Seq SW620 Human | SOX2 |
| 721 RFFL     | Enrichr CHEA_2022: SOX2 20726797 ChIP-Seq SW620 Human | SOX2 |
| 722 HLA-E    | Enrichr CHEA_2022: SOX2 20726797 ChIP-Seq SW620 Human | SOX2 |
| 723 VASP     | Enrichr CHEA_2022: SOX2 20726797 ChIP-Seq SW620 Human | SOX2 |
| 724 VNN1     | Enrichr CHEA_2022: SOX2 20726797 ChIP-Seq SW620 Human | SOX2 |
| 725 SMTN     | Enrichr CHEA_2022: SOX2 20726797 ChIP-Seq SW620 Human | SOX2 |
| 726 SPRR1A   | Enrichr CHEA_2022: SOX2 20726797 ChIP-Seq SW620 Human | SOX2 |
| 727 RPS23    | Enrichr CHEA_2022: SOX2 20726797 ChIP-Seq SW620 Human | SOX2 |
| 728 SIM2     | Enrichr CHEA_2022: SOX2 20726797 ChIP-Seq SW620 Human | SOX2 |
| 729 SPRR1B   | Enrichr CHEA_2022: SOX2 20726797 ChIP-Seq SW620 Human | SOX2 |
| 730 CFTR     | Enrichr CHEA_2022: SOX2 20726797 ChIP-Seq SW620 Human | SOX2 |

|              |                                                       |      |
|--------------|-------------------------------------------------------|------|
| 731 IL1RN    | Enrichr CHEA_2022: SOX2 20726797 ChIP-Seq SW620 Human | SOX2 |
| 732 MAGED2   | Enrichr CHEA_2022: SOX2 20726797 ChIP-Seq SW620 Human | SOX2 |
| 733 DCUN1D4  | Enrichr CHEA_2022: SOX2 20726797 ChIP-Seq SW620 Human | SOX2 |
| 734 FAM89A   | Enrichr CHEA_2022: SOX2 20726797 ChIP-Seq SW620 Human | SOX2 |
| 735 PPL      | Enrichr CHEA_2022: SOX2 20726797 ChIP-Seq SW620 Human | SOX2 |
| 736 IFIT2    | Enrichr CHEA_2022: SOX2 20726797 ChIP-Seq SW620 Human | SOX2 |
| 737 IFIT1    | Enrichr CHEA_2022: SOX2 20726797 ChIP-Seq SW620 Human | SOX2 |
| 738 TRPM2    | Enrichr CHEA_2022: SOX2 20726797 ChIP-Seq SW620 Human | SOX2 |
| 739 PDK4     | Enrichr CHEA_2022: SOX2 20726797 ChIP-Seq SW620 Human | SOX2 |
| 740 PDK1     | Enrichr CHEA_2022: SOX2 20726797 ChIP-Seq SW620 Human | SOX2 |
| 741 RALGPS2  | Enrichr CHEA_2022: SOX2 20726797 ChIP-Seq SW620 Human | SOX2 |
| 742 TRPM4    | Enrichr CHEA_2022: SOX2 20726797 ChIP-Seq SW620 Human | SOX2 |
| 743 PDK3     | Enrichr CHEA_2022: SOX2 20726797 ChIP-Seq SW620 Human | SOX2 |
| 744 PSENE1   | Enrichr CHEA_2022: SOX2 20726797 ChIP-Seq SW620 Human | SOX2 |
| 745 EDN1     | Enrichr CHEA_2022: SOX2 20726797 ChIP-Seq SW620 Human | SOX2 |
| 746 HEG1     | Enrichr CHEA_2022: SOX2 20726797 ChIP-Seq SW620 Human | SOX2 |
| 747 UBL4A    | Enrichr CHEA_2022: SOX2 20726797 ChIP-Seq SW620 Human | SOX2 |
| 748 MLF1     | Enrichr CHEA_2022: SOX2 20726797 ChIP-Seq SW620 Human | SOX2 |
| 749 MTSS1    | Enrichr CHEA_2022: SOX2 20726797 ChIP-Seq SW620 Human | SOX2 |
| 750 CLDN11   | Enrichr CHEA_2022: SOX2 20726797 ChIP-Seq SW620 Human | SOX2 |
| 751 KBTBD7   | Enrichr CHEA_2022: SOX2 20726797 ChIP-Seq SW620 Human | SOX2 |
| 752 P4HA2    | Enrichr CHEA_2022: SOX2 20726797 ChIP-Seq SW620 Human | SOX2 |
| 753 VWA1     | Enrichr CHEA_2022: SOX2 20726797 ChIP-Seq SW620 Human | SOX2 |
| 754 TLR4     | Enrichr CHEA_2022: SOX2 20726797 ChIP-Seq SW620 Human | SOX2 |
| 755 RAB7B    | Enrichr CHEA_2022: SOX2 20726797 ChIP-Seq SW620 Human | SOX2 |
| 756 SLC44A4  | Enrichr CHEA_2022: SOX2 20726797 ChIP-Seq SW620 Human | SOX2 |
| 757 CITED1   | Enrichr CHEA_2022: SOX2 20726797 ChIP-Seq SW620 Human | SOX2 |
| 758 RTN4R    | Enrichr CHEA_2022: SOX2 20726797 ChIP-Seq SW620 Human | SOX2 |
| 759 SLC44A2  | Enrichr CHEA_2022: SOX2 20726797 ChIP-Seq SW620 Human | SOX2 |
| 760 FAM43A   | Enrichr CHEA_2022: SOX2 20726797 ChIP-Seq SW620 Human | SOX2 |
| 761 CAB39L   | Enrichr CHEA_2022: SOX2 20726797 ChIP-Seq SW620 Human | SOX2 |
| 762 SLC44A1  | Enrichr CHEA_2022: SOX2 20726797 ChIP-Seq SW620 Human | SOX2 |
| 763 CHRAC1   | Enrichr CHEA_2022: SOX2 20726797 ChIP-Seq SW620 Human | SOX2 |
| 764 SLC22A15 | Enrichr CHEA_2022: SOX2 20726797 ChIP-Seq SW620 Human | SOX2 |
| 765 UGCG     | Enrichr CHEA_2022: SOX2 20726797 ChIP-Seq SW620 Human | SOX2 |
| 766 SLC22A18 | Enrichr CHEA_2022: SOX2 20726797 ChIP-Seq SW620 Human | SOX2 |
| 767 C1QBP    | Enrichr CHEA_2022: SOX2 20726797 ChIP-Seq SW620 Human | SOX2 |
| 768 TMED3    | Enrichr CHEA_2022: SOX2 20726797 ChIP-Seq SW620 Human | SOX2 |
| 769 TMED8    | Enrichr CHEA_2022: SOX2 20726797 ChIP-Seq SW620 Human | SOX2 |
| 770 TMED5    | Enrichr CHEA_2022: SOX2 20726797 ChIP-Seq SW620 Human | SOX2 |
| 771 MYEF2    | Enrichr CHEA_2022: SOX2 20726797 ChIP-Seq SW620 Human | SOX2 |
| 772 PARP4    | Enrichr CHEA_2022: SOX2 20726797 ChIP-Seq SW620 Human | SOX2 |
| 773 CBR1     | Enrichr CHEA_2022: SOX2 20726797 ChIP-Seq SW620 Human | SOX2 |
| 774 PARP2    | Enrichr CHEA_2022: SOX2 20726797 ChIP-Seq SW620 Human | SOX2 |
| 775 METTL3   | Enrichr CHEA_2022: SOX2 20726797 ChIP-Seq SW620 Human | SOX2 |
| 776 PROX1    | Enrichr CHEA_2022: SOX2 20726797 ChIP-Seq SW620 Human | SOX2 |
| 777 SORBS1   | Enrichr CHEA_2022: SOX2 20726797 ChIP-Seq SW620 Human | SOX2 |
| 778 QPCT     | Enrichr CHEA_2022: SOX2 20726797 ChIP-Seq SW620 Human | SOX2 |
| 779 SORBS2   | Enrichr CHEA_2022: SOX2 20726797 ChIP-Seq SW620 Human | SOX2 |
| 780 RAB11A   | Enrichr CHEA_2022: SOX2 20726797 ChIP-Seq SW620 Human | SOX2 |
| 781 GFRA3    | Enrichr CHEA_2022: SOX2 20726797 ChIP-Seq SW620 Human | SOX2 |
| 782 LIMA1    | Enrichr CHEA_2022: SOX2 20726797 ChIP-Seq SW620 Human | SOX2 |
| 783 PARP9    | Enrichr CHEA_2022: SOX2 20726797 ChIP-Seq SW620 Human | SOX2 |
| 784 PDP2     | Enrichr CHEA_2022: SOX2 20726797 ChIP-Seq SW620 Human | SOX2 |
| 785 ALDH5A1  | Enrichr CHEA_2022: SOX2 20726797 ChIP-Seq SW620 Human | SOX2 |
| 786 GDPD1    | Enrichr CHEA_2022: SOX2 20726797 ChIP-Seq SW620 Human | SOX2 |
| 787 RAB9A    | Enrichr CHEA_2022: SOX2 20726797 ChIP-Seq SW620 Human | SOX2 |
| 788 CSTB     | Enrichr CHEA_2022: SOX2 20726797 ChIP-Seq SW620 Human | SOX2 |
| 789 GBE1     | Enrichr CHEA_2022: SOX2 20726797 ChIP-Seq SW620 Human | SOX2 |
| 790 SIPA1L3  | Enrichr CHEA_2022: SOX2 20726797 ChIP-Seq SW620 Human | SOX2 |
| 791 CST7     | Enrichr CHEA_2022: SOX2 20726797 ChIP-Seq SW620 Human | SOX2 |

|              |                                                       |      |
|--------------|-------------------------------------------------------|------|
| 792 ROBO1    | Enrichr CHEA_2022: SOX2 20726797 ChIP-Seq SW620 Human | SOX2 |
| 793 CST6     | Enrichr CHEA_2022: SOX2 20726797 ChIP-Seq SW620 Human | SOX2 |
| 794 NKAP     | Enrichr CHEA_2022: SOX2 20726797 ChIP-Seq SW620 Human | SOX2 |
| 795 RPAIN    | Enrichr CHEA_2022: SOX2 20726797 ChIP-Seq SW620 Human | SOX2 |
| 796 SIPA1L1  | Enrichr CHEA_2022: SOX2 20726797 ChIP-Seq SW620 Human | SOX2 |
| 797 SIPA1L2  | Enrichr CHEA_2022: SOX2 20726797 ChIP-Seq SW620 Human | SOX2 |
| 798 SOSTDC1  | Enrichr CHEA_2022: SOX2 20726797 ChIP-Seq SW620 Human | SOX2 |
| 799 LMO2     | Enrichr CHEA_2022: SOX2 20726797 ChIP-Seq SW620 Human | SOX2 |
| 800 GABRP    | Enrichr CHEA_2022: SOX2 20726797 ChIP-Seq SW620 Human | SOX2 |
| 801 LMO4     | Enrichr CHEA_2022: SOX2 20726797 ChIP-Seq SW620 Human | SOX2 |
| 802 TRPV2    | Enrichr CHEA_2022: SOX2 20726797 ChIP-Seq SW620 Human | SOX2 |
| 803 GRHL2    | Enrichr CHEA_2022: SOX2 20726797 ChIP-Seq SW620 Human | SOX2 |
| 804 ATP1B1   | Enrichr CHEA_2022: SOX2 20726797 ChIP-Seq SW620 Human | SOX2 |
| 805 TATDN1   | Enrichr CHEA_2022: SOX2 20726797 ChIP-Seq SW620 Human | SOX2 |
| 806 AIG1     | Enrichr CHEA_2022: SOX2 20726797 ChIP-Seq SW620 Human | SOX2 |
| 807 GRHL1    | Enrichr CHEA_2022: SOX2 20726797 ChIP-Seq SW620 Human | SOX2 |
| 808 BAMBI    | Enrichr CHEA_2022: SOX2 20726797 ChIP-Seq SW620 Human | SOX2 |
| 809 FANCD2   | Enrichr CHEA_2022: SOX2 20726797 ChIP-Seq SW620 Human | SOX2 |
| 810 TRPV6    | Enrichr CHEA_2022: SOX2 20726797 ChIP-Seq SW620 Human | SOX2 |
| 811 CRYL1    | Enrichr CHEA_2022: SOX2 20726797 ChIP-Seq SW620 Human | SOX2 |
| 812 CHMP4B   | Enrichr CHEA_2022: SOX2 20726797 ChIP-Seq SW620 Human | SOX2 |
| 813 MYADM    | Enrichr CHEA_2022: SOX2 20726797 ChIP-Seq SW620 Human | SOX2 |
| 814 BRWD1    | Enrichr CHEA_2022: SOX2 20726797 ChIP-Seq SW620 Human | SOX2 |
| 815 LRP10    | Enrichr CHEA_2022: SOX2 20726797 ChIP-Seq SW620 Human | SOX2 |
| 816 MPHOSPH6 | Enrichr CHEA_2022: SOX2 20726797 ChIP-Seq SW620 Human | SOX2 |
| 817 XPR1     | Enrichr CHEA_2022: SOX2 20726797 ChIP-Seq SW620 Human | SOX2 |
| 818 PVR      | Enrichr CHEA_2022: SOX2 20726797 ChIP-Seq SW620 Human | SOX2 |
| 819 FBLN1    | Enrichr CHEA_2022: SOX2 20726797 ChIP-Seq SW620 Human | SOX2 |
| 820 NKD1     | Enrichr CHEA_2022: SOX2 20726797 ChIP-Seq SW620 Human | SOX2 |
| 821 COMT     | Enrichr CHEA_2022: SOX2 20726797 ChIP-Seq SW620 Human | SOX2 |
| 822 CNDP2    | Enrichr CHEA_2022: SOX2 20726797 ChIP-Seq SW620 Human | SOX2 |
| 823 HOXA13   | Enrichr CHEA_2022: SOX2 20726797 ChIP-Seq SW620 Human | SOX2 |
| 824 LMNA     | Enrichr CHEA_2022: SOX2 20726797 ChIP-Seq SW620 Human | SOX2 |
| 825 DOCK11   | Enrichr CHEA_2022: SOX2 20726797 ChIP-Seq SW620 Human | SOX2 |
| 826 NT5E     | Enrichr CHEA_2022: SOX2 20726797 ChIP-Seq SW620 Human | SOX2 |
| 827 PURB     | Enrichr CHEA_2022: SOX2 20726797 ChIP-Seq SW620 Human | SOX2 |
| 828 KISS1R   | Enrichr CHEA_2022: SOX2 20726797 ChIP-Seq SW620 Human | SOX2 |
| 829 GAS2L1   | Enrichr CHEA_2022: SOX2 20726797 ChIP-Seq SW620 Human | SOX2 |
| 830 EIF2S3   | Enrichr CHEA_2022: SOX2 20726797 ChIP-Seq SW620 Human | SOX2 |
| 831 EIF2S1   | Enrichr CHEA_2022: SOX2 20726797 ChIP-Seq SW620 Human | SOX2 |
| 832 DIAPH1   | Enrichr CHEA_2022: SOX2 20726797 ChIP-Seq SW620 Human | SOX2 |
| 833 EFNA4    | Enrichr CHEA_2022: SOX2 20726797 ChIP-Seq SW620 Human | SOX2 |
| 834 PRPF8    | Enrichr CHEA_2022: SOX2 20726797 ChIP-Seq SW620 Human | SOX2 |
| 835 COL6A1   | Enrichr CHEA_2022: SOX2 20726797 ChIP-Seq SW620 Human | SOX2 |
| 836 DDAH1    | Enrichr CHEA_2022: SOX2 20726797 ChIP-Seq SW620 Human | SOX2 |
| 837 CDH13    | Enrichr CHEA_2022: SOX2 20726797 ChIP-Seq SW620 Human | SOX2 |
| 838 FGFR1    | Enrichr CHEA_2022: SOX2 20726797 ChIP-Seq SW620 Human | SOX2 |
| 839 CHMP2A   | Enrichr CHEA_2022: SOX2 20726797 ChIP-Seq SW620 Human | SOX2 |
| 840 FGFR3    | Enrichr CHEA_2022: SOX2 20726797 ChIP-Seq SW620 Human | SOX2 |
| 841 ZCCHC2   | Enrichr CHEA_2022: SOX2 20726797 ChIP-Seq SW620 Human | SOX2 |
| 842 FGFR2    | Enrichr CHEA_2022: SOX2 20726797 ChIP-Seq SW620 Human | SOX2 |
| 843 PXK      | Enrichr CHEA_2022: SOX2 20726797 ChIP-Seq SW620 Human | SOX2 |
| 844 LZIC     | Enrichr CHEA_2022: SOX2 20726797 ChIP-Seq SW620 Human | SOX2 |
| 845 RASEF    | Enrichr CHEA_2022: SOX2 20726797 ChIP-Seq SW620 Human | SOX2 |
| 846 SPPL2A   | Enrichr CHEA_2022: SOX2 20726797 ChIP-Seq SW620 Human | SOX2 |
| 847 RBMX2    | Enrichr CHEA_2022: SOX2 20726797 ChIP-Seq SW620 Human | SOX2 |
| 848 EME2     | Enrichr CHEA_2022: SOX2 20726797 ChIP-Seq SW620 Human | SOX2 |
| 849 PMAIP1   | Enrichr CHEA_2022: SOX2 20726797 ChIP-Seq SW620 Human | SOX2 |
| 850 MLKL     | Enrichr CHEA_2022: SOX2 20726797 ChIP-Seq SW620 Human | SOX2 |
| 851 SACS     | Enrichr CHEA_2022: SOX2 20726797 ChIP-Seq SW620 Human | SOX2 |
| 852 CYP2J2   | Enrichr CHEA_2022: SOX2 20726797 ChIP-Seq SW620 Human | SOX2 |



|              |                                                       |      |
|--------------|-------------------------------------------------------|------|
| 853 CBX6     | Enrichr CHEA_2022: SOX2 20726797 ChIP-Seq SW620 Human | SOX2 |
| 854 CBX4     | Enrichr CHEA_2022: SOX2 20726797 ChIP-Seq SW620 Human | SOX2 |
| 855 CBX2     | Enrichr CHEA_2022: SOX2 20726797 ChIP-Seq SW620 Human | SOX2 |
| 856 PARVB    | Enrichr CHEA_2022: SOX2 20726797 ChIP-Seq SW620 Human | SOX2 |
| 857 IQCE     | Enrichr CHEA_2022: SOX2 20726797 ChIP-Seq SW620 Human | SOX2 |
| 858 OAS1     | Enrichr CHEA_2022: SOX2 20726797 ChIP-Seq SW620 Human | SOX2 |
| 859 DNMT1    | Enrichr CHEA_2022: SOX2 20726797 ChIP-Seq SW620 Human | SOX2 |
| 860 RBKS     | Enrichr CHEA_2022: SOX2 20726797 ChIP-Seq SW620 Human | SOX2 |
| 861 RASA1    | Enrichr CHEA_2022: SOX2 20726797 ChIP-Seq SW620 Human | SOX2 |
| 862 RABEP1   | Enrichr CHEA_2022: SOX2 20726797 ChIP-Seq SW620 Human | SOX2 |
| 863 RASA4    | Enrichr CHEA_2022: SOX2 20726797 ChIP-Seq SW620 Human | SOX2 |
| 864 OAS3     | Enrichr CHEA_2022: SOX2 20726797 ChIP-Seq SW620 Human | SOX2 |
| 865 AKT1S1   | Enrichr CHEA_2022: SOX2 20726797 ChIP-Seq SW620 Human | SOX2 |
| 866 BLMH     | Enrichr CHEA_2022: SOX2 20726797 ChIP-Seq SW620 Human | SOX2 |
| 867 DNASE2   | Enrichr CHEA_2022: SOX2 20726797 ChIP-Seq SW620 Human | SOX2 |
| 868 TERF2IP  | Enrichr CHEA_2022: SOX2 20726797 ChIP-Seq SW620 Human | SOX2 |
| 869 TRPS1    | Enrichr CHEA_2022: SOX2 20726797 ChIP-Seq SW620 Human | SOX2 |
| 870 SLC40A1  | Enrichr CHEA_2022: SOX2 20726797 ChIP-Seq SW620 Human | SOX2 |
| 871 ERICH1   | Enrichr CHEA_2022: SOX2 20726797 ChIP-Seq SW620 Human | SOX2 |
| 872 FAM83H   | Enrichr CHEA_2022: SOX2 20726797 ChIP-Seq SW620 Human | SOX2 |
| 873 WNT11    | Enrichr CHEA_2022: SOX2 20726797 ChIP-Seq SW620 Human | SOX2 |
| 874 CASP6    | Enrichr CHEA_2022: SOX2 20726797 ChIP-Seq SW620 Human | SOX2 |
| 875 CASP7    | Enrichr CHEA_2022: SOX2 20726797 ChIP-Seq SW620 Human | SOX2 |
| 876 CASP4    | Enrichr CHEA_2022: SOX2 20726797 ChIP-Seq SW620 Human | SOX2 |
| 877 SNAPC5   | Enrichr CHEA_2022: SOX2 20726797 ChIP-Seq SW620 Human | SOX2 |
| 878 FAM83A   | Enrichr CHEA_2022: SOX2 20726797 ChIP-Seq SW620 Human | SOX2 |
| 879 MYEOV    | Enrichr CHEA_2022: SOX2 20726797 ChIP-Seq SW620 Human | SOX2 |
| 880 SNAPC1   | Enrichr CHEA_2022: SOX2 20726797 ChIP-Seq SW620 Human | SOX2 |
| 881 LONRF1   | Enrichr CHEA_2022: SOX2 20726797 ChIP-Seq SW620 Human | SOX2 |
| 882 FAM83B   | Enrichr CHEA_2022: SOX2 20726797 ChIP-Seq SW620 Human | SOX2 |
| 883 RHBDF1   | Enrichr CHEA_2022: SOX2 20726797 ChIP-Seq SW620 Human | SOX2 |
| 884 IL15RA   | Enrichr CHEA_2022: SOX2 20726797 ChIP-Seq SW620 Human | SOX2 |
| 885 TMEM30B  | Enrichr CHEA_2022: SOX2 20726797 ChIP-Seq SW620 Human | SOX2 |
| 886 PLAUR    | Enrichr CHEA_2022: SOX2 20726797 ChIP-Seq SW620 Human | SOX2 |
| 887 LSR      | Enrichr CHEA_2022: SOX2 20726797 ChIP-Seq SW620 Human | SOX2 |
| 888 ANXA10   | Enrichr CHEA_2022: SOX2 20726797 ChIP-Seq SW620 Human | SOX2 |
| 889 TIAM1    | Enrichr CHEA_2022: SOX2 20726797 ChIP-Seq SW620 Human | SOX2 |
| 890 MLPH     | Enrichr CHEA_2022: SOX2 20726797 ChIP-Seq SW620 Human | SOX2 |
| 891 TRAPPC6A | Enrichr CHEA_2022: SOX2 20726797 ChIP-Seq SW620 Human | SOX2 |
| 892 ALDH1A1  | Enrichr CHEA_2022: SOX2 20726797 ChIP-Seq SW620 Human | SOX2 |
| 893 PPP2R2C  | Enrichr CHEA_2022: SOX2 20726797 ChIP-Seq SW620 Human | SOX2 |
| 894 ALDH1A3  | Enrichr CHEA_2022: SOX2 20726797 ChIP-Seq SW620 Human | SOX2 |
| 895 DDIT4    | Enrichr CHEA_2022: SOX2 20726797 ChIP-Seq SW620 Human | SOX2 |
| 896 DDIT3    | Enrichr CHEA_2022: SOX2 20726797 ChIP-Seq SW620 Human | SOX2 |
| 897 CLOCK    | Enrichr CHEA_2022: SOX2 20726797 ChIP-Seq SW620 Human | SOX2 |
| 898 SIX1     | Enrichr CHEA_2022: SOX2 20726797 ChIP-Seq SW620 Human | SOX2 |
| 899 THBS1    | Enrichr CHEA_2022: SOX2 20726797 ChIP-Seq SW620 Human | SOX2 |
| 900 OASL     | Enrichr CHEA_2022: SOX2 20726797 ChIP-Seq SW620 Human | SOX2 |
| 901 GNA14    | Enrichr CHEA_2022: SOX2 20726797 ChIP-Seq SW620 Human | SOX2 |
| 902 GNA15    | Enrichr CHEA_2022: SOX2 20726797 ChIP-Seq SW620 Human | SOX2 |
| 903 HEPH     | Enrichr CHEA_2022: SOX2 20726797 ChIP-Seq SW620 Human | SOX2 |
| 904 ARHGDI1  | Enrichr CHEA_2022: SOX2 20726797 ChIP-Seq SW620 Human | SOX2 |
| 905 LEPROTL1 | Enrichr CHEA_2022: SOX2 20726797 ChIP-Seq SW620 Human | SOX2 |
| 906 RPS6KA2  | Enrichr CHEA_2022: SOX2 20726797 ChIP-Seq SW620 Human | SOX2 |
| 907 B3GALNT1 | Enrichr CHEA_2022: SOX2 20726797 ChIP-Seq SW620 Human | SOX2 |
| 908 GDAP1    | Enrichr CHEA_2022: SOX2 20726797 ChIP-Seq SW620 Human | SOX2 |
| 909 WDHD1    | Enrichr CHEA_2022: SOX2 20726797 ChIP-Seq SW620 Human | SOX2 |
| 910 PSMB9    | Enrichr CHEA_2022: SOX2 20726797 ChIP-Seq SW620 Human | SOX2 |
| 911 EML4     | Enrichr CHEA_2022: SOX2 20726797 ChIP-Seq SW620 Human | SOX2 |
| 912 MYL5     | Enrichr CHEA_2022: SOX2 20726797 ChIP-Seq SW620 Human | SOX2 |
| 913 RBP4     | Enrichr CHEA_2022: SOX2 20726797 ChIP-Seq SW620 Human | SOX2 |

|               |                                                       |      |
|---------------|-------------------------------------------------------|------|
| 914 RBP1      | Enrichr CHEA_2022: SOX2 20726797 ChIP-Seq SW620 Human | SOX2 |
| 915 LETMD1    | Enrichr CHEA_2022: SOX2 20726797 ChIP-Seq SW620 Human | SOX2 |
| 916 LEF1      | Enrichr CHEA_2022: SOX2 20726797 ChIP-Seq SW620 Human | SOX2 |
| 917 CGGBP1    | Enrichr CHEA_2022: SOX2 20726797 ChIP-Seq SW620 Human | SOX2 |
| 918 PDXK      | Enrichr CHEA_2022: SOX2 20726797 ChIP-Seq SW620 Human | SOX2 |
| 919 ZNF274    | Enrichr CHEA_2022: SOX2 20726797 ChIP-Seq SW620 Human | SOX2 |
| 920 ZNF273    | Enrichr CHEA_2022: SOX2 20726797 ChIP-Seq SW620 Human | SOX2 |
| 921 IER5L     | Enrichr CHEA_2022: SOX2 20726797 ChIP-Seq SW620 Human | SOX2 |
| 922 FZD10     | Enrichr CHEA_2022: SOX2 20726797 ChIP-Seq SW620 Human | SOX2 |
| 923 ARAF      | Enrichr CHEA_2022: SOX2 20726797 ChIP-Seq SW620 Human | SOX2 |
| 924 CLDN3     | Enrichr CHEA_2022: SOX2 20726797 ChIP-Seq SW620 Human | SOX2 |
| 925 CLDN1     | Enrichr CHEA_2022: SOX2 20726797 ChIP-Seq SW620 Human | SOX2 |
| 926 KRTCAP3   | Enrichr CHEA_2022: SOX2 20726797 ChIP-Seq SW620 Human | SOX2 |
| 927 PREX1     | Enrichr CHEA_2022: SOX2 20726797 ChIP-Seq SW620 Human | SOX2 |
| 928 DNTTIP1   | Enrichr CHEA_2022: SOX2 20726797 ChIP-Seq SW620 Human | SOX2 |
| 929 SNCG      | Enrichr CHEA_2022: SOX2 20726797 ChIP-Seq SW620 Human | SOX2 |
| 930 STAT6     | Enrichr CHEA_2022: SOX2 20726797 ChIP-Seq SW620 Human | SOX2 |
| 931 RABAC1    | Enrichr CHEA_2022: SOX2 20726797 ChIP-Seq SW620 Human | SOX2 |
| 932 GBP3      | Enrichr CHEA_2022: SOX2 20726797 ChIP-Seq SW620 Human | SOX2 |
| 933 GBP2      | Enrichr CHEA_2022: SOX2 20726797 ChIP-Seq SW620 Human | SOX2 |
| 934 HES6      | Enrichr CHEA_2022: SOX2 20726797 ChIP-Seq SW620 Human | SOX2 |
| 935 NGFR      | Enrichr CHEA_2022: SOX2 20726797 ChIP-Seq SW620 Human | SOX2 |
| 936 MYH7B     | Enrichr CHEA_2022: SOX2 20726797 ChIP-Seq SW620 Human | SOX2 |
| 937 KLF12     | Enrichr CHEA_2022: SOX2 20726797 ChIP-Seq SW620 Human | SOX2 |
| 938 ZNF264    | Enrichr CHEA_2022: SOX2 20726797 ChIP-Seq SW620 Human | SOX2 |
| 939 GABARAPL1 | Enrichr CHEA_2022: SOX2 20726797 ChIP-Seq SW620 Human | SOX2 |
| 940 FIBCD1    | Enrichr CHEA_2022: SOX2 20726797 ChIP-Seq SW620 Human | SOX2 |
| 941 LATS2     | Enrichr CHEA_2022: SOX2 20726797 ChIP-Seq SW620 Human | SOX2 |
| 942 MLLT11    | Enrichr CHEA_2022: SOX2 20726797 ChIP-Seq SW620 Human | SOX2 |
| 943 IL22RA1   | Enrichr CHEA_2022: SOX2 20726797 ChIP-Seq SW620 Human | SOX2 |
| 944 PRKAR1B   | Enrichr CHEA_2022: SOX2 20726797 ChIP-Seq SW620 Human | SOX2 |
| 945 VAMP1     | Enrichr CHEA_2022: SOX2 20726797 ChIP-Seq SW620 Human | SOX2 |
| 946 PADI2     | Enrichr CHEA_2022: SOX2 20726797 ChIP-Seq SW620 Human | SOX2 |
| 947 VAMP3     | Enrichr CHEA_2022: SOX2 20726797 ChIP-Seq SW620 Human | SOX2 |
| 948 MCPH1     | Enrichr CHEA_2022: SOX2 20726797 ChIP-Seq SW620 Human | SOX2 |
| 949 PADI1     | Enrichr CHEA_2022: SOX2 20726797 ChIP-Seq SW620 Human | SOX2 |
| 950 LXN       | Enrichr CHEA_2022: SOX2 20726797 ChIP-Seq SW620 Human | SOX2 |
| 951 SCHIP1    | Enrichr CHEA_2022: SOX2 20726797 ChIP-Seq SW620 Human | SOX2 |
| 952 UXS1      | Enrichr CHEA_2022: SOX2 20726797 ChIP-Seq SW620 Human | SOX2 |
| 953 MRPL13    | Enrichr CHEA_2022: SOX2 20726797 ChIP-Seq SW620 Human | SOX2 |
| 954 TMEM92    | Enrichr CHEA_2022: SOX2 20726797 ChIP-Seq SW620 Human | SOX2 |
| 955 MYLK      | Enrichr CHEA_2022: SOX2 20726797 ChIP-Seq SW620 Human | SOX2 |
| 956 LIPG      | Enrichr CHEA_2022: SOX2 20726797 ChIP-Seq SW620 Human | SOX2 |
| 957 NETO2     | Enrichr CHEA_2022: SOX2 20726797 ChIP-Seq SW620 Human | SOX2 |
| 958 GRPEL2    | Enrichr CHEA_2022: SOX2 20726797 ChIP-Seq SW620 Human | SOX2 |
| 959 IL20RA    | Enrichr CHEA_2022: SOX2 20726797 ChIP-Seq SW620 Human | SOX2 |
| 960 KCNMB4    | Enrichr CHEA_2022: SOX2 20726797 ChIP-Seq SW620 Human | SOX2 |
| 961 ZBTB7C    | Enrichr CHEA_2022: SOX2 20726797 ChIP-Seq SW620 Human | SOX2 |
| 962 AMZ2      | Enrichr CHEA_2022: SOX2 20726797 ChIP-Seq SW620 Human | SOX2 |
| 963 RHBDL2    | Enrichr CHEA_2022: SOX2 20726797 ChIP-Seq SW620 Human | SOX2 |
| 964 ANKIB1    | Enrichr CHEA_2022: SOX2 20726797 ChIP-Seq SW620 Human | SOX2 |
| 965 HACE1     | Enrichr CHEA_2022: SOX2 20726797 ChIP-Seq SW620 Human | SOX2 |
| 966 UPF2      | Enrichr CHEA_2022: SOX2 20726797 ChIP-Seq SW620 Human | SOX2 |
| 967 LYN       | Enrichr CHEA_2022: SOX2 20726797 ChIP-Seq SW620 Human | SOX2 |
| 968 FGFBP1    | Enrichr CHEA_2022: SOX2 20726797 ChIP-Seq SW620 Human | SOX2 |
| 969 RIPK3     | Enrichr CHEA_2022: SOX2 20726797 ChIP-Seq SW620 Human | SOX2 |
| 970 NSUN4     | Enrichr CHEA_2022: SOX2 20726797 ChIP-Seq SW620 Human | SOX2 |
| 971 EMP3      | Enrichr CHEA_2022: SOX2 20726797 ChIP-Seq SW620 Human | SOX2 |
| 972 FAHD2A    | Enrichr CHEA_2022: SOX2 20726797 ChIP-Seq SW620 Human | SOX2 |
| 973 TMCO4     | Enrichr CHEA_2022: SOX2 20726797 ChIP-Seq SW620 Human | SOX2 |
| 974 TMCS      | Enrichr CHEA_2022: SOX2 20726797 ChIP-Seq SW620 Human | SOX2 |

|              |                                                       |      |
|--------------|-------------------------------------------------------|------|
| 975 LYZ      | Enrichr CHEA_2022: SOX2 20726797 ChIP-Seq SW620 Human | SOX2 |
| 976 TMC4     | Enrichr CHEA_2022: SOX2 20726797 ChIP-Seq SW620 Human | SOX2 |
| 977 GPRC5A   | Enrichr CHEA_2022: SOX2 20726797 ChIP-Seq SW620 Human | SOX2 |
| 978 LETM2    | Enrichr CHEA_2022: SOX2 20726797 ChIP-Seq SW620 Human | SOX2 |
| 979 PIGA     | Enrichr CHEA_2022: SOX2 20726797 ChIP-Seq SW620 Human | SOX2 |
| 980 PIGK     | Enrichr CHEA_2022: SOX2 20726797 ChIP-Seq SW620 Human | SOX2 |
| 981 ZNF239   | Enrichr CHEA_2022: SOX2 20726797 ChIP-Seq SW620 Human | SOX2 |
| 982 ZNF232   | Enrichr CHEA_2022: SOX2 20726797 ChIP-Seq SW620 Human | SOX2 |
| 983 ATF7IP2  | Enrichr CHEA_2022: SOX2 20726797 ChIP-Seq SW620 Human | SOX2 |
| 984 ACAT1    | Enrichr CHEA_2022: SOX2 20726797 ChIP-Seq SW620 Human | SOX2 |
| 985 IQGAP1   | Enrichr CHEA_2022: SOX2 20726797 ChIP-Seq SW620 Human | SOX2 |
| 986 LITAF    | Enrichr CHEA_2022: SOX2 20726797 ChIP-Seq SW620 Human | SOX2 |
| 987 IQGAP2   | Enrichr CHEA_2022: SOX2 20726797 ChIP-Seq SW620 Human | SOX2 |
| 988 MRPL38   | Enrichr CHEA_2022: SOX2 20726797 ChIP-Seq SW620 Human | SOX2 |
| 989 LRRC1    | Enrichr CHEA_2022: SOX2 20726797 ChIP-Seq SW620 Human | SOX2 |
| 990 AREG     | Enrichr CHEA_2022: SOX2 20726797 ChIP-Seq SW620 Human | SOX2 |
| 991 LRRC34   | Enrichr CHEA_2022: SOX2 20726797 ChIP-Seq SW620 Human | SOX2 |
| 992 HSD11B2  | Enrichr CHEA_2022: SOX2 20726797 ChIP-Seq SW620 Human | SOX2 |
| 993 UGT8     | Enrichr CHEA_2022: SOX2 20726797 ChIP-Seq SW620 Human | SOX2 |
| 994 MYO6     | Enrichr CHEA_2022: SOX2 20726797 ChIP-Seq SW620 Human | SOX2 |
| 995 PACSIN3  | Enrichr CHEA_2022: SOX2 20726797 ChIP-Seq SW620 Human | SOX2 |
| 996 SH3BGRL3 | Enrichr CHEA_2022: SOX2 20726797 ChIP-Seq SW620 Human | SOX2 |
| 997 STAP2    | Enrichr CHEA_2022: SOX2 20726797 ChIP-Seq SW620 Human | SOX2 |
| 998 CTBS     | Enrichr CHEA_2022: SOX2 20726797 ChIP-Seq SW620 Human | SOX2 |
| 999 CGNL1    | Enrichr CHEA_2022: SOX2 20726797 ChIP-Seq SW620 Human | SOX2 |
| 1000 ELOVL1  | Enrichr CHEA_2022: SOX2 20726797 ChIP-Seq SW620 Human | SOX2 |
| 1001 GPR37   | Enrichr CHEA_2022: SOX2 20726797 ChIP-Seq SW620 Human | SOX2 |
| 1002 NANOS1  | Enrichr CHEA_2022: SOX2 20726797 ChIP-Seq SW620 Human | SOX2 |
| 1003 AADAT   | Enrichr CHEA_2022: SOX2 20726797 ChIP-Seq SW620 Human | SOX2 |
| 1004 CSNK2A2 | Enrichr CHEA_2022: SOX2 20726797 ChIP-Seq SW620 Human | SOX2 |
| 1005 ELOVL5  | Enrichr CHEA_2022: SOX2 20726797 ChIP-Seq SW620 Human | SOX2 |
| 1006 ARG2    | Enrichr CHEA_2022: SOX2 20726797 ChIP-Seq SW620 Human | SOX2 |
| 1007 STAT3   | Enrichr CHEA_2022: SOX2 20726797 ChIP-Seq SW620 Human | SOX2 |
| 1008 TMEM62  | Enrichr CHEA_2022: SOX2 20726797 ChIP-Seq SW620 Human | SOX2 |
| 1009 TRNT1   | Enrichr CHEA_2022: SOX2 20726797 ChIP-Seq SW620 Human | SOX2 |
| 1010 ELOVL7  | Enrichr CHEA_2022: SOX2 20726797 ChIP-Seq SW620 Human | SOX2 |
| 1011 RNASE4  | Enrichr CHEA_2022: SOX2 20726797 ChIP-Seq SW620 Human | SOX2 |
| 1012 TMEM65  | Enrichr CHEA_2022: SOX2 20726797 ChIP-Seq SW620 Human | SOX2 |
| 1013 LRG1    | Enrichr CHEA_2022: SOX2 20726797 ChIP-Seq SW620 Human | SOX2 |
| 1014 F5      | Enrichr CHEA_2022: SOX2 20726797 ChIP-Seq SW620 Human | SOX2 |
| 1015 FABP5   | Enrichr CHEA_2022: SOX2 20726797 ChIP-Seq SW620 Human | SOX2 |
| 1016 MRPL52  | Enrichr CHEA_2022: SOX2 20726797 ChIP-Seq SW620 Human | SOX2 |
| 1017 AADAC   | Enrichr CHEA_2022: SOX2 20726797 ChIP-Seq SW620 Human | SOX2 |
| 1018 PELI1   | Enrichr CHEA_2022: SOX2 20726797 ChIP-Seq SW620 Human | SOX2 |
| 1019 GOPC    | Enrichr CHEA_2022: SOX2 20726797 ChIP-Seq SW620 Human | SOX2 |
| 1020 ZNF697  | Enrichr CHEA_2022: SOX2 20726797 ChIP-Seq SW620 Human | SOX2 |
| 1021 ZNF211  | Enrichr CHEA_2022: SOX2 20726797 ChIP-Seq SW620 Human | SOX2 |
| 1022 PIGV    | Enrichr CHEA_2022: SOX2 20726797 ChIP-Seq SW620 Human | SOX2 |
| 1023 RNASEL  | Enrichr CHEA_2022: SOX2 20726797 ChIP-Seq SW620 Human | SOX2 |
| 1024 QPRT    | Enrichr CHEA_2022: SOX2 20726797 ChIP-Seq SW620 Human | SOX2 |
| 1025 F13A1   | Enrichr CHEA_2022: SOX2 20726797 ChIP-Seq SW620 Human | SOX2 |
| 1026 TMEM51  | Enrichr CHEA_2022: SOX2 20726797 ChIP-Seq SW620 Human | SOX2 |
| 1027 TMEM54  | Enrichr CHEA_2022: SOX2 20726797 ChIP-Seq SW620 Human | SOX2 |
| 1028 JPH1    | Enrichr CHEA_2022: SOX2 20726797 ChIP-Seq SW620 Human | SOX2 |
| 1029 PTGS1   | Enrichr CHEA_2022: SOX2 20726797 ChIP-Seq SW620 Human | SOX2 |
| 1030 PTGS2   | Enrichr CHEA_2022: SOX2 20726797 ChIP-Seq SW620 Human | SOX2 |
| 1031 NSDHL   | Enrichr CHEA_2022: SOX2 20726797 ChIP-Seq SW620 Human | SOX2 |
| 1032 HEY1    | Enrichr CHEA_2022: SOX2 20726797 ChIP-Seq SW620 Human | SOX2 |
| 1033 TMEM47  | Enrichr CHEA_2022: SOX2 20726797 ChIP-Seq SW620 Human | SOX2 |
| 1034 ZNF207  | Enrichr CHEA_2022: SOX2 20726797 ChIP-Seq SW620 Human | SOX2 |
| 1035 MYLIP   | Enrichr CHEA_2022: SOX2 20726797 ChIP-Seq SW620 Human | SOX2 |

|                |                                                       |      |
|----------------|-------------------------------------------------------|------|
| 1036 AGTPBP1   | Enrichr CHEA_2022: SOX2 20726797 ChIP-Seq SW620 Human | SOX2 |
| 1037 SEC24B    | Enrichr CHEA_2022: SOX2 20726797 ChIP-Seq SW620 Human | SOX2 |
| 1038 GK        | Enrichr CHEA_2022: SOX2 20726797 ChIP-Seq SW620 Human | SOX2 |
| 1039 S100A3    | Enrichr CHEA_2022: SOX2 20726797 ChIP-Seq SW620 Human | SOX2 |
| 1040 BRPF3     | Enrichr CHEA_2022: SOX2 20726797 ChIP-Seq SW620 Human | SOX2 |
| 1041 S100A2    | Enrichr CHEA_2022: SOX2 20726797 ChIP-Seq SW620 Human | SOX2 |
| 1042 CRYBB2    | Enrichr CHEA_2022: SOX2 20726797 ChIP-Seq SW620 Human | SOX2 |
| 1043 ZBTB10    | Enrichr CHEA_2022: SOX2 20726797 ChIP-Seq SW620 Human | SOX2 |
| 1044 SAP30     | Enrichr CHEA_2022: SOX2 20726797 ChIP-Seq SW620 Human | SOX2 |
| 1045 MAPKAPK3  | Enrichr CHEA_2022: SOX2 20726797 ChIP-Seq SW620 Human | SOX2 |
| 1046 RIMBP2    | Enrichr CHEA_2022: SOX2 20726797 ChIP-Seq SW620 Human | SOX2 |
| 1047 SQSTM1    | Enrichr CHEA_2022: SOX2 20726797 ChIP-Seq SW620 Human | SOX2 |
| 1048 SEC24D    | Enrichr CHEA_2022: SOX2 20726797 ChIP-Seq SW620 Human | SOX2 |
| 1049 ROR1      | Enrichr CHEA_2022: SOX2 20726797 ChIP-Seq SW620 Human | SOX2 |
| 1050 UTRN      | Enrichr CHEA_2022: SOX2 20726797 ChIP-Seq SW620 Human | SOX2 |
| 1051 DSC2      | Enrichr CHEA_2022: SOX2 20726797 ChIP-Seq SW620 Human | SOX2 |
| 1052 UGT1A10   | Enrichr CHEA_2022: SOX2 20726797 ChIP-Seq SW620 Human | SOX2 |
| 1053 HDCC2     | Enrichr CHEA_2022: SOX2 20726797 ChIP-Seq SW620 Human | SOX2 |
| 1054 TMF1      | Enrichr CHEA_2022: SOX2 20726797 ChIP-Seq SW620 Human | SOX2 |
| 1055 UBE2D3    | Enrichr CHEA_2022: SOX2 20726797 ChIP-Seq SW620 Human | SOX2 |
| 1056 HP        | Enrichr CHEA_2022: SOX2 20726797 ChIP-Seq SW620 Human | SOX2 |
| 1057 UCP2      | Enrichr CHEA_2022: SOX2 20726797 ChIP-Seq SW620 Human | SOX2 |
| 1058 DEFB1     | Enrichr CHEA_2022: SOX2 20726797 ChIP-Seq SW620 Human | SOX2 |
| 1059 CXCL16    | Enrichr CHEA_2022: SOX2 20726797 ChIP-Seq SW620 Human | SOX2 |
| 1060 SH3BP2    | Enrichr CHEA_2022: SOX2 20726797 ChIP-Seq SW620 Human | SOX2 |
| 1061 HAS2      | Enrichr CHEA_2022: SOX2 20726797 ChIP-Seq SW620 Human | SOX2 |
| 1062 SH3BP5    | Enrichr CHEA_2022: SOX2 20726797 ChIP-Seq SW620 Human | SOX2 |
| 1063 HAS3      | Enrichr CHEA_2022: SOX2 20726797 ChIP-Seq SW620 Human | SOX2 |
| 1064 SLC16A9   | Enrichr CHEA_2022: SOX2 20726797 ChIP-Seq SW620 Human | SOX2 |
| 1065 SLC16A4   | Enrichr CHEA_2022: SOX2 20726797 ChIP-Seq SW620 Human | SOX2 |
| 1066 PITX2     | Enrichr CHEA_2022: SOX2 20726797 ChIP-Seq SW620 Human | SOX2 |
| 1067 SLC16A5   | Enrichr CHEA_2022: SOX2 20726797 ChIP-Seq SW620 Human | SOX2 |
| 1068 ATP9A     | Enrichr CHEA_2022: SOX2 20726797 ChIP-Seq SW620 Human | SOX2 |
| 1069 SLC16A6   | Enrichr CHEA_2022: SOX2 20726797 ChIP-Seq SW620 Human | SOX2 |
| 1070 SLC38A2   | Enrichr CHEA_2022: SOX2 20726797 ChIP-Seq SW620 Human | SOX2 |
| 1071 TNFRSF10B | Enrichr CHEA_2022: SOX2 20726797 ChIP-Seq SW620 Human | SOX2 |
| 1072 FRMD6     | Enrichr CHEA_2022: SOX2 20726797 ChIP-Seq SW620 Human | SOX2 |
| 1073 CDC42EP5  | Enrichr CHEA_2022: SOX2 20726797 ChIP-Seq SW620 Human | SOX2 |
| 1074 CDC42EP4  | Enrichr CHEA_2022: SOX2 20726797 ChIP-Seq SW620 Human | SOX2 |
| 1075 BIRC5     | Enrichr CHEA_2022: SOX2 20726797 ChIP-Seq SW620 Human | SOX2 |
| 1076 FSCN1     | Enrichr CHEA_2022: SOX2 20726797 ChIP-Seq SW620 Human | SOX2 |
| 1077 CDC42EP2  | Enrichr CHEA_2022: SOX2 20726797 ChIP-Seq SW620 Human | SOX2 |
| 1078 ZNF655    | Enrichr CHEA_2022: SOX2 20726797 ChIP-Seq SW620 Human | SOX2 |
| 1079 ZNF654    | Enrichr CHEA_2022: SOX2 20726797 ChIP-Seq SW620 Human | SOX2 |
| 1080 LRRC57    | Enrichr CHEA_2022: SOX2 20726797 ChIP-Seq SW620 Human | SOX2 |
| 1081 PFKFB4    | Enrichr CHEA_2022: SOX2 20726797 ChIP-Seq SW620 Human | SOX2 |
| 1082 GPR87     | Enrichr CHEA_2022: SOX2 20726797 ChIP-Seq SW620 Human | SOX2 |
| 1083 TACSTD2   | Enrichr CHEA_2022: SOX2 20726797 ChIP-Seq SW620 Human | SOX2 |
| 1084 SAT2      | Enrichr CHEA_2022: SOX2 20726797 ChIP-Seq SW620 Human | SOX2 |
| 1085 HNMT      | Enrichr CHEA_2022: SOX2 20726797 ChIP-Seq SW620 Human | SOX2 |
| 1086 GLIS2     | Enrichr CHEA_2022: SOX2 20726797 ChIP-Seq SW620 Human | SOX2 |
| 1087 PORCN     | Enrichr CHEA_2022: SOX2 20726797 ChIP-Seq SW620 Human | SOX2 |
| 1088 SESN2     | Enrichr CHEA_2022: SOX2 20726797 ChIP-Seq SW620 Human | SOX2 |
| 1089 SESN3     | Enrichr CHEA_2022: SOX2 20726797 ChIP-Seq SW620 Human | SOX2 |
| 1090 LEPR      | Enrichr CHEA_2022: SOX2 20726797 ChIP-Seq SW620 Human | SOX2 |
| 1091 MBP       | Enrichr CHEA_2022: SOX2 20726797 ChIP-Seq SW620 Human | SOX2 |
| 1092 SLC38A5   | Enrichr CHEA_2022: SOX2 20726797 ChIP-Seq SW620 Human | SOX2 |
| 1093 DGCR2     | Enrichr CHEA_2022: SOX2 20726797 ChIP-Seq SW620 Human | SOX2 |
| 1094 CYBB5B    | Enrichr CHEA_2022: SOX2 20726797 ChIP-Seq SW620 Human | SOX2 |
| 1095 SETDB2    | Enrichr CHEA_2022: SOX2 20726797 ChIP-Seq SW620 Human | SOX2 |
| 1096 MCC       | Enrichr CHEA_2022: SOX2 20726797 ChIP-Seq SW620 Human | SOX2 |

|      |           |                                                       |      |
|------|-----------|-------------------------------------------------------|------|
| 1097 | CYB5A     | Enrichr CHEA_2022: SOX2 20726797 ChIP-Seq SW620 Human | SOX2 |
| 1098 | QKI       | Enrichr CHEA_2022: SOX2 20726797 ChIP-Seq SW620 Human | SOX2 |
| 1099 | UST       | Enrichr CHEA_2022: SOX2 20726797 ChIP-Seq SW620 Human | SOX2 |
| 1100 | AAK1      | Enrichr CHEA_2022: SOX2 20726797 ChIP-Seq SW620 Human | SOX2 |
| 1101 | SLC25A1   | Enrichr CHEA_2022: SOX2 20726797 ChIP-Seq SW620 Human | SOX2 |
| 1102 | SLC25A4   | Enrichr CHEA_2022: SOX2 20726797 ChIP-Seq SW620 Human | SOX2 |
| 1103 | RAP1GAP   | Enrichr CHEA_2022: SOX2 20726797 ChIP-Seq SW620 Human | SOX2 |
| 1104 | PELP1     | Enrichr CHEA_2022: SOX2 20726797 ChIP-Seq SW620 Human | SOX2 |
| 1105 | FCHO2     | Enrichr CHEA_2022: SOX2 20726797 ChIP-Seq SW620 Human | SOX2 |
| 1106 | DSP       | Enrichr CHEA_2022: SOX2 20726797 ChIP-Seq SW620 Human | SOX2 |
| 1107 | NDUFA8    | Enrichr CHEA_2022: SOX2 20726797 ChIP-Seq SW620 Human | SOX2 |
| 1108 | SEC22A    | Enrichr CHEA_2022: SOX2 20726797 ChIP-Seq SW620 Human | SOX2 |
| 1109 | DST       | Enrichr CHEA_2022: SOX2 20726797 ChIP-Seq SW620 Human | SOX2 |
| 1110 | NDUFA3    | Enrichr CHEA_2022: SOX2 20726797 ChIP-Seq SW620 Human | SOX2 |
| 1111 | LYSMD2    | Enrichr CHEA_2022: SOX2 20726797 ChIP-Seq SW620 Human | SOX2 |
| 1112 | TPD52L1   | Enrichr CHEA_2022: SOX2 20726797 ChIP-Seq SW620 Human | SOX2 |
| 1113 | PPM1A     | Enrichr CHEA_2022: SOX2 20726797 ChIP-Seq SW620 Human | SOX2 |
| 1114 | ZNF618    | Enrichr CHEA_2022: SOX2 20726797 ChIP-Seq SW620 Human | SOX2 |
| 1115 | MET       | Enrichr CHEA_2022: SOX2 20726797 ChIP-Seq SW620 Human | SOX2 |
| 1116 | SEC22C    | Enrichr CHEA_2022: SOX2 20726797 ChIP-Seq SW620 Human | SOX2 |
| 1117 | SLC25A14  | Enrichr CHEA_2022: SOX2 20726797 ChIP-Seq SW620 Human | SOX2 |
| 1118 | EPHB6     | Enrichr CHEA_2022: SOX2 20726797 ChIP-Seq SW620 Human | SOX2 |
| 1119 | FHL1      | Enrichr CHEA_2022: SOX2 20726797 ChIP-Seq SW620 Human | SOX2 |
| 1120 | PIK3CD    | Enrichr CHEA_2022: SOX2 20726797 ChIP-Seq SW620 Human | SOX2 |
| 1121 | PTPRZ1    | Enrichr CHEA_2022: SOX2 20726797 ChIP-Seq SW620 Human | SOX2 |
| 1122 | SLITRK6   | Enrichr CHEA_2022: SOX2 20726797 ChIP-Seq SW620 Human | SOX2 |
| 1123 | UPP1      | Enrichr CHEA_2022: SOX2 20726797 ChIP-Seq SW620 Human | SOX2 |
| 1124 | EPHB2     | Enrichr CHEA_2022: SOX2 20726797 ChIP-Seq SW620 Human | SOX2 |
| 1125 | EPHB4     | Enrichr CHEA_2022: SOX2 20726797 ChIP-Seq SW620 Human | SOX2 |
| 1126 | ACVR1     | Enrichr CHEA_2022: SOX2 20726797 ChIP-Seq SW620 Human | SOX2 |
| 1127 | ZFP1      | Enrichr CHEA_2022: SOX2 20726797 ChIP-Seq SW620 Human | SOX2 |
| 1128 | SLC12A2   | Enrichr CHEA_2022: SOX2 20726797 ChIP-Seq SW620 Human | SOX2 |
| 1129 | PLEKHA6   | Enrichr CHEA_2022: SOX2 20726797 ChIP-Seq SW620 Human | SOX2 |
| 1130 | TM4SF4    | Enrichr CHEA_2022: SOX2 20726797 ChIP-Seq SW620 Human | SOX2 |
| 1131 | EREG      | Enrichr CHEA_2022: SOX2 20726797 ChIP-Seq SW620 Human | SOX2 |
| 1132 | PPP1R3D   | Enrichr CHEA_2022: SOX2 20726797 ChIP-Seq SW620 Human | SOX2 |
| 1133 | IFI27     | Enrichr CHEA_2022: SOX2 20726797 ChIP-Seq SW620 Human | SOX2 |
| 1134 | LACTB2    | Enrichr CHEA_2022: SOX2 20726797 ChIP-Seq SW620 Human | SOX2 |
| 1135 | MXRA7     | Enrichr CHEA_2022: SOX2 20726797 ChIP-Seq SW620 Human | SOX2 |
| 1136 | COL9A3    | Enrichr CHEA_2022: SOX2 20726797 ChIP-Seq SW620 Human | SOX2 |
| 1137 | ALPK3     | Enrichr CHEA_2022: SOX2 20726797 ChIP-Seq SW620 Human | SOX2 |
| 1138 | EPHA1     | Enrichr CHEA_2022: SOX2 20726797 ChIP-Seq SW620 Human | SOX2 |
| 1139 | EPHA4     | Enrichr CHEA_2022: SOX2 20726797 ChIP-Seq SW620 Human | SOX2 |
| 1140 | TMEM87A   | Enrichr CHEA_2022: SOX2 20726797 ChIP-Seq SW620 Human | SOX2 |
| 1141 | SATB1     | Enrichr CHEA_2022: SOX2 20726797 ChIP-Seq SW620 Human | SOX2 |
| 1142 | KDELRL2   | Enrichr CHEA_2022: SOX2 20726797 ChIP-Seq SW620 Human | SOX2 |
| 1143 | PEX11A    | Enrichr CHEA_2022: SOX2 20726797 ChIP-Seq SW620 Human | SOX2 |
| 1144 | PEX11B    | Enrichr CHEA_2022: SOX2 20726797 ChIP-Seq SW620 Human | SOX2 |
| 1145 | LRP4      | Enrichr CHEA_2022: SOX2 20726797 ChIP-Seq SW620 Human | SOX2 |
| 1146 | PRCP      | Enrichr CHEA_2022: SOX2 20726797 ChIP-Seq SW620 Human | SOX2 |
| 1147 | CYB5D1    | Enrichr CHEA_2022: SOX2 20726797 ChIP-Seq SW620 Human | SOX2 |
| 1148 | UBE2L6    | Enrichr CHEA_2022: SOX2 20726797 ChIP-Seq SW620 Human | SOX2 |
| 1149 | LRP8      | Enrichr CHEA_2022: SOX2 20726797 ChIP-Seq SW620 Human | SOX2 |
| 1150 | NTN4      | Enrichr CHEA_2022: SOX2 20726797 ChIP-Seq SW620 Human | SOX2 |
| 1151 | CYB5D2    | Enrichr CHEA_2022: SOX2 20726797 ChIP-Seq SW620 Human | SOX2 |
| 1152 | BAIAP2L1  | Enrichr CHEA_2022: SOX2 20726797 ChIP-Seq SW620 Human | SOX2 |
| 1153 | RAB11FIP1 | Enrichr CHEA_2022: SOX2 20726797 ChIP-Seq SW620 Human | SOX2 |
| 1154 | EXOSC6    | Enrichr CHEA_2022: SOX2 20726797 ChIP-Seq SW620 Human | SOX2 |
| 1155 | PARD6B    | Enrichr CHEA_2022: SOX2 20726797 ChIP-Seq SW620 Human | SOX2 |
| 1156 | BAIAP2L2  | Enrichr CHEA_2022: SOX2 20726797 ChIP-Seq SW620 Human | SOX2 |
| 1157 | CHORDC1   | Enrichr CHEA_2022: SOX2 20726797 ChIP-Seq SW620 Human | SOX2 |

|                |                                                       |      |
|----------------|-------------------------------------------------------|------|
| 1158 TGOLN2    | Enrichr CHEA_2022: SOX2 20726797 ChIP-Seq SW620 Human | SOX2 |
| 1159 POF1B     | Enrichr CHEA_2022: SOX2 20726797 ChIP-Seq SW620 Human | SOX2 |
| 1160 RAB11FIP4 | Enrichr CHEA_2022: SOX2 20726797 ChIP-Seq SW620 Human | SOX2 |
| 1161 WWTR1     | Enrichr CHEA_2022: SOX2 20726797 ChIP-Seq SW620 Human | SOX2 |
| 1162 PAQR5     | Enrichr CHEA_2022: SOX2 20726797 ChIP-Seq SW620 Human | SOX2 |
| 1163 FOXF2     | Enrichr CHEA_2022: SOX2 20726797 ChIP-Seq SW620 Human | SOX2 |
| 1164 ST6GAL1   | Enrichr CHEA_2022: SOX2 20726797 ChIP-Seq SW620 Human | SOX2 |
| 1165 PAQR3     | Enrichr CHEA_2022: SOX2 20726797 ChIP-Seq SW620 Human | SOX2 |
| 1166 PLA2G4A   | Enrichr CHEA_2022: SOX2 20726797 ChIP-Seq SW620 Human | SOX2 |
| 1167 HSPA12A   | Enrichr CHEA_2022: SOX2 20726797 ChIP-Seq SW620 Human | SOX2 |
| 1168 IFI44     | Enrichr CHEA_2022: SOX2 20726797 ChIP-Seq SW620 Human | SOX2 |
| 1169 PIK3R1    | Enrichr CHEA_2022: SOX2 20726797 ChIP-Seq SW620 Human | SOX2 |
| 1170 TAGLN2    | Enrichr CHEA_2022: SOX2 20726797 ChIP-Seq SW620 Human | SOX2 |
| 1171 RGL2      | Enrichr CHEA_2022: SOX2 20726797 ChIP-Seq SW620 Human | SOX2 |
| 1172 RGL1      | Enrichr CHEA_2022: SOX2 20726797 ChIP-Seq SW620 Human | SOX2 |
| 1173 SPON2     | Enrichr CHEA_2022: SOX2 20726797 ChIP-Seq SW620 Human | SOX2 |
| 1174 IFI35     | Enrichr CHEA_2022: SOX2 20726797 ChIP-Seq SW620 Human | SOX2 |
| 1175 PRF1      | Enrichr CHEA_2022: SOX2 20726797 ChIP-Seq SW620 Human | SOX2 |
| 1176 BRCC3     | Enrichr CHEA_2022: SOX2 20726797 ChIP-Seq SW620 Human | SOX2 |
| 1177 PELO      | Enrichr CHEA_2022: SOX2 20726797 ChIP-Seq SW620 Human | SOX2 |
| 1178 RASSF3    | Enrichr CHEA_2022: SOX2 20726797 ChIP-Seq SW620 Human | SOX2 |
| 1179 RASSF5    | Enrichr CHEA_2022: SOX2 20726797 ChIP-Seq SW620 Human | SOX2 |
| 1180 RASSF6    | Enrichr CHEA_2022: SOX2 20726797 ChIP-Seq SW620 Human | SOX2 |
| 1181 MICAL2    | Enrichr CHEA_2022: SOX2 20726797 ChIP-Seq SW620 Human | SOX2 |
| 1182 TSPAN8    | Enrichr CHEA_2022: SOX2 20726797 ChIP-Seq SW620 Human | SOX2 |
| 1183 ANKH      | Enrichr CHEA_2022: SOX2 20726797 ChIP-Seq SW620 Human | SOX2 |
| 1184 ARSJ      | Enrichr CHEA_2022: SOX2 20726797 ChIP-Seq SW620 Human | SOX2 |
| 1185 TSPAN6    | Enrichr CHEA_2022: SOX2 20726797 ChIP-Seq SW620 Human | SOX2 |
| 1186 ZBED2     | Enrichr CHEA_2022: SOX2 20726797 ChIP-Seq SW620 Human | SOX2 |
| 1187 KIF21B    | Enrichr CHEA_2022: SOX2 20726797 ChIP-Seq SW620 Human | SOX2 |
| 1188 TSPAN3    | Enrichr CHEA_2022: SOX2 20726797 ChIP-Seq SW620 Human | SOX2 |
| 1189 CD14      | Enrichr CHEA_2022: SOX2 20726797 ChIP-Seq SW620 Human | SOX2 |
| 1190 TSPAN1    | Enrichr CHEA_2022: SOX2 20726797 ChIP-Seq SW620 Human | SOX2 |
| 1191 ACAD11    | Enrichr CHEA_2022: SOX2 20726797 ChIP-Seq SW620 Human | SOX2 |
| 1192 PGBD1     | Enrichr CHEA_2022: SOX2 20726797 ChIP-Seq SW620 Human | SOX2 |
| 1193 ARSD      | Enrichr CHEA_2022: SOX2 20726797 ChIP-Seq SW620 Human | SOX2 |
| 1194 CTSB      | Enrichr CHEA_2022: SOX2 20726797 ChIP-Seq SW620 Human | SOX2 |
| 1195 NBPF3     | Enrichr CHEA_2022: SOX2 20726797 ChIP-Seq SW620 Human | SOX2 |
| 1196 FOXD1     | Enrichr CHEA_2022: SOX2 20726797 ChIP-Seq SW620 Human | SOX2 |
| 1197 TNFRSF12A | Enrichr CHEA_2022: SOX2 20726797 ChIP-Seq SW620 Human | SOX2 |
| 1198 MMEL1     | Enrichr CHEA_2022: SOX2 20726797 ChIP-Seq SW620 Human | SOX2 |
| 1199 KLK10     | Enrichr CHEA_2022: SOX2 20726797 ChIP-Seq SW620 Human | SOX2 |
| 1200 KLK11     | Enrichr CHEA_2022: SOX2 20726797 ChIP-Seq SW620 Human | SOX2 |
| 1201 RGMA      | Enrichr CHEA_2022: SOX2 20726797 ChIP-Seq SW620 Human | SOX2 |
| 1202 ENAH      | Enrichr CHEA_2022: SOX2 20726797 ChIP-Seq SW620 Human | SOX2 |
| 1203 NR5A2     | Enrichr CHEA_2022: SOX2 20726797 ChIP-Seq SW620 Human | SOX2 |
| 1204 PTPRF     | Enrichr CHEA_2022: SOX2 20726797 ChIP-Seq SW620 Human | SOX2 |
| 1205 SERGEF    | Enrichr CHEA_2022: SOX2 20726797 ChIP-Seq SW620 Human | SOX2 |
| 1206 TH        | Enrichr CHEA_2022: SOX2 20726797 ChIP-Seq SW620 Human | SOX2 |
| 1207 PTPRB     | Enrichr CHEA_2022: SOX2 20726797 ChIP-Seq SW620 Human | SOX2 |
| 1208 VSNL1     | Enrichr CHEA_2022: SOX2 20726797 ChIP-Seq SW620 Human | SOX2 |
| 1209 ID2       | Enrichr CHEA_2022: SOX2 20726797 ChIP-Seq SW620 Human | SOX2 |
| 1210 MKX       | Enrichr CHEA_2022: SOX2 20726797 ChIP-Seq SW620 Human | SOX2 |
| 1211 CD24      | Enrichr CHEA_2022: SOX2 20726797 ChIP-Seq SW620 Human | SOX2 |
| 1212 FOXC1     | Enrichr CHEA_2022: SOX2 20726797 ChIP-Seq SW620 Human | SOX2 |
| 1213 CETN2     | Enrichr CHEA_2022: SOX2 20726797 ChIP-Seq SW620 Human | SOX2 |
| 1214 PTPRO     | Enrichr CHEA_2022: SOX2 20726797 ChIP-Seq SW620 Human | SOX2 |
| 1215 INTS10    | Enrichr CHEA_2022: SOX2 20726797 ChIP-Seq SW620 Human | SOX2 |
| 1216 TMPRSS4   | Enrichr CHEA_2022: SOX2 20726797 ChIP-Seq SW620 Human | SOX2 |
| 1217 CTSZ      | Enrichr CHEA_2022: SOX2 20726797 ChIP-Seq SW620 Human | SOX2 |
| 1218 KIF15     | Enrichr CHEA_2022: SOX2 20726797 ChIP-Seq SW620 Human | SOX2 |

|              |                                                       |      |
|--------------|-------------------------------------------------------|------|
| 1219 KIF14   | Enrichr CHEA_2022: SOX2 20726797 ChIP-Seq SW620 Human | SOX2 |
| 1220 HNF4G   | Enrichr CHEA_2022: SOX2 20726797 ChIP-Seq SW620 Human | SOX2 |
| 1221 TMPRSS3 | Enrichr CHEA_2022: SOX2 20726797 ChIP-Seq SW620 Human | SOX2 |
| 1222 PCSK9   | Enrichr CHEA_2022: SOX2 20726797 ChIP-Seq SW620 Human | SOX2 |
| 1223 NEDD9   | Enrichr CHEA_2022: SOX2 20726797 ChIP-Seq SW620 Human | SOX2 |
| 1224 PCSK6   | Enrichr CHEA_2022: SOX2 20726797 ChIP-Seq SW620 Human | SOX2 |
| 1225 CTSS    | Enrichr CHEA_2022: SOX2 20726797 ChIP-Seq SW620 Human | SOX2 |
| 1226 PTPRH   | Enrichr CHEA_2022: SOX2 20726797 ChIP-Seq SW620 Human | SOX2 |
| 1227 ACACA   | Enrichr CHEA_2022: SOX2 20726797 ChIP-Seq SW620 Human | SOX2 |
| 1228 SNX5    | Enrichr CHEA_2022: SOX2 20726797 ChIP-Seq SW620 Human | SOX2 |
| 1229 SOCS2   | Enrichr CHEA_2022: SOX2 20726797 ChIP-Seq SW620 Human | SOX2 |
| 1230 SNX1    | Enrichr CHEA_2022: SOX2 20726797 ChIP-Seq SW620 Human | SOX2 |
| 1231 IDS     | Enrichr CHEA_2022: SOX2 20726797 ChIP-Seq SW620 Human | SOX2 |
| 1232 CTSL    | Enrichr CHEA_2022: SOX2 20726797 ChIP-Seq SW620 Human | SOX2 |
| 1233 STK39   | Enrichr CHEA_2022: SOX2 20726797 ChIP-Seq SW620 Human | SOX2 |
| 1234 CTSH    | Enrichr CHEA_2022: SOX2 20726797 ChIP-Seq SW620 Human | SOX2 |
| 1235 LMCD1   | Enrichr CHEA_2022: SOX2 20726797 ChIP-Seq SW620 Human | SOX2 |
| 1236 SNX9    | Enrichr CHEA_2022: SOX2 20726797 ChIP-Seq SW620 Human | SOX2 |
| 1237 CTSD    | Enrichr CHEA_2022: SOX2 20726797 ChIP-Seq SW620 Human | SOX2 |
| 1238 SOCS5   | Enrichr CHEA_2022: SOX2 20726797 ChIP-Seq SW620 Human | SOX2 |
| 1239 SOCS6   | Enrichr CHEA_2022: SOX2 20726797 ChIP-Seq SW620 Human | SOX2 |
| 1240 MMD     | Enrichr CHEA_2022: SOX2 20726797 ChIP-Seq SW620 Human | SOX2 |
| 1241 BCAP31  | Enrichr CHEA_2022: SOX2 20726797 ChIP-Seq SW620 Human | SOX2 |
| 1242 MME     | Enrichr CHEA_2022: SOX2 20726797 ChIP-Seq SW620 Human | SOX2 |
| 1243 AP2B1   | Enrichr CHEA_2022: SOX2 20726797 ChIP-Seq SW620 Human | SOX2 |
| 1244 UBE2E2  | Enrichr CHEA_2022: SOX2 20726797 ChIP-Seq SW620 Human | SOX2 |
| 1245 MIB1    | Enrichr CHEA_2022: SOX2 20726797 ChIP-Seq SW620 Human | SOX2 |
| 1246 FKBP1B  | Enrichr CHEA_2022: SOX2 20726797 ChIP-Seq SW620 Human | SOX2 |
| 1247 NEDD1   | Enrichr CHEA_2022: SOX2 20726797 ChIP-Seq SW620 Human | SOX2 |
| 1248 STK17B  | Enrichr CHEA_2022: SOX2 20726797 ChIP-Seq SW620 Human | SOX2 |
| 1249 CCNE2   | Enrichr CHEA_2022: SOX2 20726797 ChIP-Seq SW620 Human | SOX2 |
| 1250 CCNE1   | Enrichr CHEA_2022: SOX2 20726797 ChIP-Seq SW620 Human | SOX2 |
| 1251 EPPK1   | Enrichr CHEA_2022: SOX2 20726797 ChIP-Seq SW620 Human | SOX2 |
| 1252 IL17D   | Enrichr CHEA_2022: SOX2 20726797 ChIP-Seq SW620 Human | SOX2 |
| 1253 CD44    | Enrichr CHEA_2022: SOX2 20726797 ChIP-Seq SW620 Human | SOX2 |
| 1254 NPDC1   | Enrichr CHEA_2022: SOX2 20726797 ChIP-Seq SW620 Human | SOX2 |
| 1255 DBN1    | Enrichr CHEA_2022: SOX2 20726797 ChIP-Seq SW620 Human | SOX2 |
| 1256 FOXA2   | Enrichr CHEA_2022: SOX2 20726797 ChIP-Seq SW620 Human | SOX2 |
| 1257 ERFFI1  | Enrichr CHEA_2022: SOX2 20726797 ChIP-Seq SW620 Human | SOX2 |
| 1258 FOXA1   | Enrichr CHEA_2022: SOX2 20726797 ChIP-Seq SW620 Human | SOX2 |
| 1259 FKBP11  | Enrichr CHEA_2022: SOX2 20726797 ChIP-Seq SW620 Human | SOX2 |
| 1260 SLC43A3 | Enrichr CHEA_2022: SOX2 20726797 ChIP-Seq SW620 Human | SOX2 |
| 1261 SLC43A1 | Enrichr CHEA_2022: SOX2 20726797 ChIP-Seq SW620 Human | SOX2 |
| 1262 FKBP14  | Enrichr CHEA_2022: SOX2 20726797 ChIP-Seq SW620 Human | SOX2 |
| 1263 AKR1B1  | Enrichr CHEA_2022: SOX2 20726797 ChIP-Seq SW620 Human | SOX2 |
| 1264 FHOD3   | Enrichr CHEA_2022: SOX2 20726797 ChIP-Seq SW620 Human | SOX2 |
| 1265 WASL    | Enrichr CHEA_2022: SOX2 20726797 ChIP-Seq SW620 Human | SOX2 |
| 1266 DERL1   | Enrichr CHEA_2022: SOX2 20726797 ChIP-Seq SW620 Human | SOX2 |
| 1267 ZDHHC2  | Enrichr CHEA_2022: SOX2 20726797 ChIP-Seq SW620 Human | SOX2 |
| 1268 CRIP1   | Enrichr CHEA_2022: SOX2 20726797 ChIP-Seq SW620 Human | SOX2 |
| 1269 CRIP2   | Enrichr CHEA_2022: SOX2 20726797 ChIP-Seq SW620 Human | SOX2 |
| 1270 SCML1   | Enrichr CHEA_2022: SOX2 20726797 ChIP-Seq SW620 Human | SOX2 |
| 1271 PGRMC2  | Enrichr CHEA_2022: SOX2 20726797 ChIP-Seq SW620 Human | SOX2 |
| 1272 SPTLC2  | Enrichr CHEA_2022: SOX2 20726797 ChIP-Seq SW620 Human | SOX2 |
| 1273 CAMK2N1 | Enrichr CHEA_2022: SOX2 20726797 ChIP-Seq SW620 Human | SOX2 |
| 1274 SERTAD2 | Enrichr CHEA_2022: SOX2 20726797 ChIP-Seq SW620 Human | SOX2 |
| 1275 SERTAD3 | Enrichr CHEA_2022: SOX2 20726797 ChIP-Seq SW620 Human | SOX2 |
| 1276 ENC1    | Enrichr CHEA_2022: SOX2 20726797 ChIP-Seq SW620 Human | SOX2 |
| 1277 SERTAD1 | Enrichr CHEA_2022: SOX2 20726797 ChIP-Seq SW620 Human | SOX2 |
| 1278 CD59    | Enrichr CHEA_2022: SOX2 20726797 ChIP-Seq SW620 Human | SOX2 |
| 1279 CD55    | Enrichr CHEA_2022: SOX2 20726797 ChIP-Seq SW620 Human | SOX2 |

|               |                                                       |      |
|---------------|-------------------------------------------------------|------|
| 1280 NPNT     | Enrichr CHEA_2022: SOX2 20726797 ChIP-Seq SW620 Human | SOX2 |
| 1281 G6PD     | Enrichr CHEA_2022: SOX2 20726797 ChIP-Seq SW620 Human | SOX2 |
| 1282 CRIM1    | Enrichr CHEA_2022: SOX2 20726797 ChIP-Seq SW620 Human | SOX2 |
| 1283 MID1     | Enrichr CHEA_2022: SOX2 20726797 ChIP-Seq SW620 Human | SOX2 |
| 1284 TANC2    | Enrichr CHEA_2022: SOX2 20726797 ChIP-Seq SW620 Human | SOX2 |
| 1285 XK       | Enrichr CHEA_2022: SOX2 20726797 ChIP-Seq SW620 Human | SOX2 |
| 1286 IVNS1ABP | Enrichr CHEA_2022: SOX2 20726797 ChIP-Seq SW620 Human | SOX2 |
| 1287 CD82     | Enrichr CHEA_2022: SOX2 20726797 ChIP-Seq SW620 Human | SOX2 |
| 1288 SLC1A1   | Enrichr CHEA_2022: SOX2 20726797 ChIP-Seq SW620 Human | SOX2 |
| 1289 AURKB    | Enrichr CHEA_2022: SOX2 20726797 ChIP-Seq SW620 Human | SOX2 |
| 1290 RXRA     | Enrichr CHEA_2022: SOX2 20726797 ChIP-Seq SW620 Human | SOX2 |
| 1291 RAB40B   | Enrichr CHEA_2022: SOX2 20726797 ChIP-Seq SW620 Human | SOX2 |
| 1292 SH3TC2   | Enrichr CHEA_2022: SOX2 20726797 ChIP-Seq SW620 Human | SOX2 |
| 1293 HSF2     | Enrichr CHEA_2022: SOX2 20726797 ChIP-Seq SW620 Human | SOX2 |
| 1294 NPHP3    | Enrichr CHEA_2022: SOX2 20726797 ChIP-Seq SW620 Human | SOX2 |
| 1295 CCR2     | Enrichr CHEA_2022: SOX2 20726797 ChIP-Seq SW620 Human | SOX2 |
| 1296 GPC4     | Enrichr CHEA_2022: SOX2 20726797 ChIP-Seq SW620 Human | SOX2 |
| 1297 PAK6     | Enrichr CHEA_2022: SOX2 20726797 ChIP-Seq SW620 Human | SOX2 |
| 1298 MICB     | Enrichr CHEA_2022: SOX2 20726797 ChIP-Seq SW620 Human | SOX2 |
| 1299 SLC30A7  | Enrichr CHEA_2022: SOX2 20726797 ChIP-Seq SW620 Human | SOX2 |
| 1300 INHBB    | Enrichr CHEA_2022: SOX2 20726797 ChIP-Seq SW620 Human | SOX2 |
| 1301 ISG15    | Enrichr CHEA_2022: SOX2 20726797 ChIP-Seq SW620 Human | SOX2 |
| 1302 SSH3     | Enrichr CHEA_2022: SOX2 20726797 ChIP-Seq SW620 Human | SOX2 |
| 1303 PAN3     | Enrichr CHEA_2022: SOX2 20726797 ChIP-Seq SW620 Human | SOX2 |
| 1304 QDPR     | Enrichr CHEA_2022: SOX2 20726797 ChIP-Seq SW620 Human | SOX2 |
| 1305 PROCN    | Enrichr CHEA_2022: SOX2 20726797 ChIP-Seq SW620 Human | SOX2 |
| 1306 GEMIN7   | Enrichr CHEA_2022: SOX2 20726797 ChIP-Seq SW620 Human | SOX2 |
| 1307 TAB3     | Enrichr CHEA_2022: SOX2 20726797 ChIP-Seq SW620 Human | SOX2 |
| 1308 GCLM     | Enrichr CHEA_2022: SOX2 20726797 ChIP-Seq SW620 Human | SOX2 |
| 1309 BLVRB    | Enrichr CHEA_2022: SOX2 20726797 ChIP-Seq SW620 Human | SOX2 |
| 1310 ARHGEF10 | Enrichr CHEA_2022: SOX2 20726797 ChIP-Seq SW620 Human | SOX2 |
| 1311 LRRFIP1  | Enrichr CHEA_2022: SOX2 20726797 ChIP-Seq SW620 Human | SOX2 |
| 1312 KLHL15   | Enrichr CHEA_2022: SOX2 20726797 ChIP-Seq SW620 Human | SOX2 |
| 1313 WWC1     | Enrichr CHEA_2022: SOX2 20726797 ChIP-Seq SW620 Human | SOX2 |
| 1314 WWC2     | Enrichr CHEA_2022: SOX2 20726797 ChIP-Seq SW620 Human | SOX2 |
| 1315 RGS3     | Enrichr CHEA_2022: SOX2 20726797 ChIP-Seq SW620 Human | SOX2 |
| 1316 CALD1    | Enrichr CHEA_2022: SOX2 20726797 ChIP-Seq SW620 Human | SOX2 |
| 1317 RGS2     | Enrichr CHEA_2022: SOX2 20726797 ChIP-Seq SW620 Human | SOX2 |
| 1318 NDEL1    | Enrichr CHEA_2022: SOX2 20726797 ChIP-Seq SW620 Human | SOX2 |
| 1319 CD99     | Enrichr CHEA_2022: SOX2 20726797 ChIP-Seq SW620 Human | SOX2 |
| 1320 MMP7     | Enrichr CHEA_2022: SOX2 20726797 ChIP-Seq SW620 Human | SOX2 |
| 1321 GALNT6   | Enrichr CHEA_2022: SOX2 20726797 ChIP-Seq SW620 Human | SOX2 |
| 1322 GALNT5   | Enrichr CHEA_2022: SOX2 20726797 ChIP-Seq SW620 Human | SOX2 |
| 1323 GALNT4   | Enrichr CHEA_2022: SOX2 20726797 ChIP-Seq SW620 Human | SOX2 |
| 1324 GALNT3   | Enrichr CHEA_2022: SOX2 20726797 ChIP-Seq SW620 Human | SOX2 |
| 1325 HMGA2    | Enrichr CHEA_2022: SOX2 20726797 ChIP-Seq SW620 Human | SOX2 |
| 1326 GULP1    | Enrichr CHEA_2022: SOX2 20726797 ChIP-Seq SW620 Human | SOX2 |
| 1327 BMP7     | Enrichr CHEA_2022: SOX2 20726797 ChIP-Seq SW620 Human | SOX2 |
| 1328 BMP5     | Enrichr CHEA_2022: SOX2 20726797 ChIP-Seq SW620 Human | SOX2 |
| 1329 IRF1     | Enrichr CHEA_2022: SOX2 20726797 ChIP-Seq SW620 Human | SOX2 |
| 1330 BMP4     | Enrichr CHEA_2022: SOX2 20726797 ChIP-Seq SW620 Human | SOX2 |
| 1331 BMP2     | Enrichr CHEA_2022: SOX2 20726797 ChIP-Seq SW620 Human | SOX2 |
| 1332 MMRN2    | Enrichr CHEA_2022: SOX2 20726797 ChIP-Seq SW620 Human | SOX2 |
| 1333 RBM20    | Enrichr CHEA_2022: SOX2 20726797 ChIP-Seq SW620 Human | SOX2 |
| 1334 IRF6     | Enrichr CHEA_2022: SOX2 20726797 ChIP-Seq SW620 Human | SOX2 |
| 1335 IRF7     | Enrichr CHEA_2022: SOX2 20726797 ChIP-Seq SW620 Human | SOX2 |
| 1336 TMEM45A  | Enrichr CHEA_2022: SOX2 20726797 ChIP-Seq SW620 Human | SOX2 |
| 1337 TMEM45B  | Enrichr CHEA_2022: SOX2 20726797 ChIP-Seq SW620 Human | SOX2 |
| 1338 PSMD11   | Enrichr CHEA_2022: SOX2 20726797 ChIP-Seq SW620 Human | SOX2 |
| 1339 RTN3     | Enrichr CHEA_2022: SOX2 20726797 ChIP-Seq SW620 Human | SOX2 |
| 1340 CHD2     | Enrichr CHEA_2022: SOX2 20726797 ChIP-Seq SW620 Human | SOX2 |



|               |                                                       |      |
|---------------|-------------------------------------------------------|------|
| 1341 FUT2     | Enrichr CHEA_2022: SOX2 20726797 ChIP-Seq SW620 Human | SOX2 |
| 1342 AFF1     | Enrichr CHEA_2022: SOX2 20726797 ChIP-Seq SW620 Human | SOX2 |
| 1343 PDLIM1   | Enrichr CHEA_2022: SOX2 20726797 ChIP-Seq SW620 Human | SOX2 |
| 1344 CALB1    | Enrichr CHEA_2022: SOX2 20726797 ChIP-Seq SW620 Human | SOX2 |
| 1345 PDLIM4   | Enrichr CHEA_2022: SOX2 20726797 ChIP-Seq SW620 Human | SOX2 |
| 1346 MARVELD1 | Enrichr CHEA_2022: SOX2 20726797 ChIP-Seq SW620 Human | SOX2 |
| 1347 CALB2    | Enrichr CHEA_2022: SOX2 20726797 ChIP-Seq SW620 Human | SOX2 |
| 1348 FUT8     | Enrichr CHEA_2022: SOX2 20726797 ChIP-Seq SW620 Human | SOX2 |
| 1349 ISOC2    | Enrichr CHEA_2022: SOX2 20726797 ChIP-Seq SW620 Human | SOX2 |
| 1350 PDLIM5   | Enrichr CHEA_2022: SOX2 20726797 ChIP-Seq SW620 Human | SOX2 |
| 1351 WNT3     | Enrichr CHEA_2022: SOX2 20726797 ChIP-Seq SW620 Human | SOX2 |
| 1352 DDX17    | Enrichr CHEA_2022: SOX2 20726797 ChIP-Seq SW620 Human | SOX2 |
| 1353 TBC1D9   | Enrichr CHEA_2022: SOX2 20726797 ChIP-Seq SW620 Human | SOX2 |
| 1354 ATP2B4   | Enrichr CHEA_2022: SOX2 20726797 ChIP-Seq SW620 Human | SOX2 |
| 1355 FNDC3A   | Enrichr CHEA_2022: SOX2 20726797 ChIP-Seq SW620 Human | SOX2 |
| 1356 FNDC3B   | Enrichr CHEA_2022: SOX2 20726797 ChIP-Seq SW620 Human | SOX2 |
| 1357 ATP2B1   | Enrichr CHEA_2022: SOX2 20726797 ChIP-Seq SW620 Human | SOX2 |
| 1358 TBC1D1   | Enrichr CHEA_2022: SOX2 20726797 ChIP-Seq SW620 Human | SOX2 |
| 1359 TBC1D2   | Enrichr CHEA_2022: SOX2 20726797 ChIP-Seq SW620 Human | SOX2 |
| 1360 PTHLH    | Enrichr CHEA_2022: SOX2 20726797 ChIP-Seq SW620 Human | SOX2 |
| 1361 SBK1     | Enrichr CHEA_2022: SOX2 20726797 ChIP-Seq SW620 Human | SOX2 |
| 1362 TBC1D4   | Enrichr CHEA_2022: SOX2 20726797 ChIP-Seq SW620 Human | SOX2 |
| 1363 TBC1D5   | Enrichr CHEA_2022: SOX2 20726797 ChIP-Seq SW620 Human | SOX2 |
| 1364 LNX2     | Enrichr CHEA_2022: SOX2 20726797 ChIP-Seq SW620 Human | SOX2 |
| 1365 FAM50A   | Enrichr CHEA_2022: SOX2 20726797 ChIP-Seq SW620 Human | SOX2 |
| 1366 LNX1     | Enrichr CHEA_2022: SOX2 20726797 ChIP-Seq SW620 Human | SOX2 |
| 1367 S100P    | Enrichr CHEA_2022: SOX2 20726797 ChIP-Seq SW620 Human | SOX2 |
| 1368 CHURC1   | Enrichr CHEA_2022: SOX2 20726797 ChIP-Seq SW620 Human | SOX2 |
| 1369 ZP3      | Enrichr CHEA_2022: SOX2 20726797 ChIP-Seq SW620 Human | SOX2 |
| 1370 CLUAP1   | Enrichr CHEA_2022: SOX2 20726797 ChIP-Seq SW620 Human | SOX2 |
| 1371 SCARB2   | Enrichr CHEA_2022: SOX2 20726797 ChIP-Seq SW620 Human | SOX2 |
| 1372 DCTN6    | Enrichr CHEA_2022: SOX2 20726797 ChIP-Seq SW620 Human | SOX2 |
| 1373 DDX28    | Enrichr CHEA_2022: SOX2 20726797 ChIP-Seq SW620 Human | SOX2 |
| 1374 LAMA3    | Enrichr CHEA_2022: SOX2 20726797 ChIP-Seq SW620 Human | SOX2 |
| 1375 MVP      | Enrichr CHEA_2022: SOX2 20726797 ChIP-Seq SW620 Human | SOX2 |
| 1376 ZNF292   | Enrichr CHEA_2022: SOX2 20726797 ChIP-Seq SW620 Human | SOX2 |
| 1377 CRMP1    | Enrichr CHEA_2022: SOX2 20726797 ChIP-Seq SW620 Human | SOX2 |
| 1378 ATP2A3   | Enrichr CHEA_2022: SOX2 20726797 ChIP-Seq SW620 Human | SOX2 |
| 1379 ATP2A2   | Enrichr CHEA_2022: SOX2 20726797 ChIP-Seq SW620 Human | SOX2 |
| 1380 RPGR     | Enrichr CHEA_2022: SOX2 20726797 ChIP-Seq SW620 Human | SOX2 |
| 1381 CLN6     | Enrichr CHEA_2022: SOX2 20726797 ChIP-Seq SW620 Human | SOX2 |
| 1382 CLMN     | Enrichr CHEA_2022: SOX2 20726797 ChIP-Seq SW620 Human | SOX2 |
| 1383 EPS8L1   | Enrichr CHEA_2022: SOX2 20726797 ChIP-Seq SW620 Human | SOX2 |
| 1384 SCN5A    | Enrichr CHEA_2022: SOX2 20726797 ChIP-Seq SW620 Human | SOX2 |
| 1385 EPS8L2   | Enrichr CHEA_2022: SOX2 20726797 ChIP-Seq SW620 Human | SOX2 |
| 1386 NPTN     | Enrichr CHEA_2022: SOX2 20726797 ChIP-Seq SW620 Human | SOX2 |
| 1387 ACOT9    | Enrichr CHEA_2022: SOX2 20726797 ChIP-Seq SW620 Human | SOX2 |
| 1388 MX1      | Enrichr CHEA_2022: SOX2 20726797 ChIP-Seq SW620 Human | SOX2 |
| 1389 GLCE     | Enrichr CHEA_2022: SOX2 20726797 ChIP-Seq SW620 Human | SOX2 |
| 1390 RPL23    | Enrichr CHEA_2022: SOX2 20726797 ChIP-Seq SW620 Human | SOX2 |
| 1391 SYTL2    | Enrichr CHEA_2022: SOX2 20726797 ChIP-Seq SW620 Human | SOX2 |
| 1392 UPF3B    | Enrichr CHEA_2022: SOX2 20726797 ChIP-Seq SW620 Human | SOX2 |
| 1393 CHFR     | Enrichr CHEA_2022: SOX2 20726797 ChIP-Seq SW620 Human | SOX2 |
| 1394 DYNC1L11 | Enrichr CHEA_2022: SOX2 20726797 ChIP-Seq SW620 Human | SOX2 |
| 1395 GALNS    | Enrichr CHEA_2022: SOX2 20726797 ChIP-Seq SW620 Human | SOX2 |
| 1396 CPEB2    | Enrichr CHEA_2022: SOX2 20726797 ChIP-Seq SW620 Human | SOX2 |
| 1397 GPR160   | Enrichr CHEA_2022: SOX2 20726797 ChIP-Seq SW620 Human | SOX2 |
| 1398 ASB9     | Enrichr CHEA_2022: SOX2 20726797 ChIP-Seq SW620 Human | SOX2 |
| 1399 TRIP6    | Enrichr CHEA_2022: SOX2 20726797 ChIP-Seq SW620 Human | SOX2 |
| 1400 VIM      | Enrichr CHEA_2022: SOX2 20726797 ChIP-Seq SW620 Human | SOX2 |
| 1401 HSPA1A   | Enrichr CHEA_2022: SOX2 20726797 ChIP-Seq SW620 Human | SOX2 |

|               |                                                       |      |
|---------------|-------------------------------------------------------|------|
| 1402 ASF1A    | Enrichr CHEA_2022: SOX2 20726797 ChIP-Seq SW620 Human | SOX2 |
| 1403 ACOT2    | Enrichr CHEA_2022: SOX2 20726797 ChIP-Seq SW620 Human | SOX2 |
| 1404 ASB4     | Enrichr CHEA_2022: SOX2 20726797 ChIP-Seq SW620 Human | SOX2 |
| 1405 CPVL     | Enrichr CHEA_2022: SOX2 20726797 ChIP-Seq SW620 Human | SOX2 |
| 1406 HSPA1B   | Enrichr CHEA_2022: SOX2 20726797 ChIP-Seq SW620 Human | SOX2 |
| 1407 PARG     | Enrichr CHEA_2022: SOX2 20726797 ChIP-Seq SW620 Human | SOX2 |
| 1408 SF3B3    | Enrichr CHEA_2022: SOX2 20726797 ChIP-Seq SW620 Human | SOX2 |
| 1409 EHF      | Enrichr CHEA_2022: SOX2 20726797 ChIP-Seq SW620 Human | SOX2 |
| 1410 MAML3    | Enrichr CHEA_2022: SOX2 20726797 ChIP-Seq SW620 Human | SOX2 |
| 1411 AHNAK    | Enrichr CHEA_2022: SOX2 20726797 ChIP-Seq SW620 Human | SOX2 |
| 1412 SERPINE1 | Enrichr CHEA_2022: SOX2 20726797 ChIP-Seq SW620 Human | SOX2 |
| 1413 THYN1    | Enrichr CHEA_2022: SOX2 20726797 ChIP-Seq SW620 Human | SOX2 |
| 1414 ASAH1    | Enrichr CHEA_2022: SOX2 20726797 ChIP-Seq SW620 Human | SOX2 |
| 1415 PCMT1    | Enrichr CHEA_2022: SOX2 20726797 ChIP-Seq SW620 Human | SOX2 |
| 1416 CREB3L1  | Enrichr CHEA_2022: SOX2 20726797 ChIP-Seq SW620 Human | SOX2 |
| 1417 MYB      | Enrichr CHEA_2022: SOX2 20726797 ChIP-Seq SW620 Human | SOX2 |
| 1418 CHST13   | Enrichr CHEA_2022: SOX2 20726797 ChIP-Seq SW620 Human | SOX2 |
| 1419 CHST11   | Enrichr CHEA_2022: SOX2 20726797 ChIP-Seq SW620 Human | SOX2 |
| 1420 S100A14  | Enrichr CHEA_2022: SOX2 20726797 ChIP-Seq SW620 Human | SOX2 |
| 1421 SERPINF1 | Enrichr CHEA_2022: SOX2 20726797 ChIP-Seq SW620 Human | SOX2 |
| 1422 HOXA2    | Enrichr CHEA_2022: SOX2 20726797 ChIP-Seq SW620 Human | SOX2 |
| 1423 CYP1B1   | Enrichr CHEA_2022: SOX2 20726797 ChIP-Seq SW620 Human | SOX2 |
| 1424 HOXA7    | Enrichr CHEA_2022: SOX2 20726797 ChIP-Seq SW620 Human | SOX2 |
| 1425 HOXA5    | Enrichr CHEA_2022: SOX2 20726797 ChIP-Seq SW620 Human | SOX2 |
| 1426 F8A1     | Enrichr CHEA_2022: SOX2 20726797 ChIP-Seq SW620 Human | SOX2 |
| 1427 WNT10A   | Enrichr CHEA_2022: SOX2 20726797 ChIP-Seq SW620 Human | SOX2 |
| 1428 FZD3     | Enrichr CHEA_2022: SOX2 20726797 ChIP-Seq SW620 Human | SOX2 |
| 1429 FZD6     | Enrichr CHEA_2022: SOX2 20726797 ChIP-Seq SW620 Human | SOX2 |
| 1430 ST14     | Enrichr CHEA_2022: SOX2 20726797 ChIP-Seq SW620 Human | SOX2 |
| 1431 RAB3IP   | Enrichr CHEA_2022: SOX2 20726797 ChIP-Seq SW620 Human | SOX2 |
| 1432 FZD7     | Enrichr CHEA_2022: SOX2 20726797 ChIP-Seq SW620 Human | SOX2 |
| 1433 SLC16A10 | Enrichr CHEA_2022: SOX2 20726797 ChIP-Seq SW620 Human | SOX2 |
| 1434 GPR137B  | Enrichr CHEA_2022: SOX2 20726797 ChIP-Seq SW620 Human | SOX2 |
| 1435 SULT2B1  | Enrichr CHEA_2022: SOX2 20726797 ChIP-Seq SW620 Human | SOX2 |
| 1436 SLC6A8   | Enrichr CHEA_2022: SOX2 20726797 ChIP-Seq SW620 Human | SOX2 |
| 1437 BIN3     | Enrichr CHEA_2022: SOX2 20726797 ChIP-Seq SW620 Human | SOX2 |
| 1438 HOXB3    | Enrichr CHEA_2022: SOX2 20726797 ChIP-Seq SW620 Human | SOX2 |
| 1439 SSPN     | Enrichr CHEA_2022: SOX2 20726797 ChIP-Seq SW620 Human | SOX2 |
| 1440 HBP1     | Enrichr CHEA_2022: SOX2 20726797 ChIP-Seq SW620 Human | SOX2 |
| 1441 HOXB9    | Enrichr CHEA_2022: SOX2 20726797 ChIP-Seq SW620 Human | SOX2 |
| 1442 HSPA4L   | Enrichr CHEA_2022: SOX2 20726797 ChIP-Seq SW620 Human | SOX2 |
| 1443 RPL5     | Enrichr CHEA_2022: SOX2 20726797 ChIP-Seq SW620 Human | SOX2 |
| 1444 CDC42SE2 | Enrichr CHEA_2022: SOX2 20726797 ChIP-Seq SW620 Human | SOX2 |
| 1445 ZNF134   | Enrichr CHEA_2022: SOX2 20726797 ChIP-Seq SW620 Human | SOX2 |
| 1446 STMN3    | Enrichr CHEA_2022: SOX2 20726797 ChIP-Seq SW620 Human | SOX2 |
| 1447 ENO3     | Enrichr CHEA_2022: SOX2 20726797 ChIP-Seq SW620 Human | SOX2 |
| 1448 PRDX4    | Enrichr CHEA_2022: SOX2 20726797 ChIP-Seq SW620 Human | SOX2 |
| 1449 ZXDB     | Enrichr CHEA_2022: SOX2 20726797 ChIP-Seq SW620 Human | SOX2 |
| 1450 STMN1    | Enrichr CHEA_2022: SOX2 20726797 ChIP-Seq SW620 Human | SOX2 |
| 1451 RPL37    | Enrichr CHEA_2022: SOX2 20726797 ChIP-Seq SW620 Human | SOX2 |
| 1452 PLCG1    | Enrichr CHEA_2022: SOX2 20726797 ChIP-Seq SW620 Human | SOX2 |
| 1453 IER5     | Enrichr CHEA_2022: SOX2 20726797 ChIP-Seq SW620 Human | SOX2 |
| 1454 ZNF124   | Enrichr CHEA_2022: SOX2 20726797 ChIP-Seq SW620 Human | SOX2 |
| 1455 BLCAP    | Enrichr CHEA_2022: SOX2 20726797 ChIP-Seq SW620 Human | SOX2 |
| 1456 ANXA4    | Enrichr CHEA_2022: SOX2 20726797 ChIP-Seq SW620 Human | SOX2 |
| 1457 CCL20    | Enrichr CHEA_2022: SOX2 20726797 ChIP-Seq SW620 Human | SOX2 |
| 1458 ANXA5    | Enrichr CHEA_2022: SOX2 20726797 ChIP-Seq SW620 Human | SOX2 |
| 1459 TESC     | Enrichr CHEA_2022: SOX2 20726797 ChIP-Seq SW620 Human | SOX2 |
| 1460 PAX6     | Enrichr CHEA_2022: SOX2 20726797 ChIP-Seq SW620 Human | SOX2 |
| 1461 TIMM22   | Enrichr CHEA_2022: SOX2 20726797 ChIP-Seq SW620 Human | SOX2 |
| 1462 CARD6    | Enrichr CHEA_2022: SOX2 20726797 ChIP-Seq SW620 Human | SOX2 |

|               |                                                       |      |
|---------------|-------------------------------------------------------|------|
| 1463 ITPKA    | Enrichr CHEA_2022: SOX2 20726797 ChIP-Seq SW620 Human | SOX2 |
| 1464 GIPC2    | Enrichr CHEA_2022: SOX2 20726797 ChIP-Seq SW620 Human | SOX2 |
| 1465 JDP2     | Enrichr CHEA_2022: SOX2 20726797 ChIP-Seq SW620 Human | SOX2 |
| 1466 RNF141   | Enrichr CHEA_2022: SOX2 20726797 ChIP-Seq SW620 Human | SOX2 |
| 1467 REN      | Enrichr CHEA_2022: SOX2 20726797 ChIP-Seq SW620 Human | SOX2 |
| 1468 ADA      | Enrichr CHEA_2022: SOX2 20726797 ChIP-Seq SW620 Human | SOX2 |
| 1469 SERPINA1 | Enrichr CHEA_2022: SOX2 20726797 ChIP-Seq SW620 Human | SOX2 |
| 1470 CLTA     | Enrichr CHEA_2022: SOX2 20726797 ChIP-Seq SW620 Human | SOX2 |
| 1471 GLG1     | Enrichr CHEA_2022: SOX2 20726797 ChIP-Seq SW620 Human | SOX2 |
| 1472 RNF157   | Enrichr CHEA_2022: SOX2 20726797 ChIP-Seq SW620 Human | SOX2 |
| 1473 CSRP2    | Enrichr CHEA_2022: SOX2 20726797 ChIP-Seq SW620 Human | SOX2 |
| 1474 TRIM4    | Enrichr CHEA_2022: SOX2 20726797 ChIP-Seq SW620 Human | SOX2 |
| 1475 GPRASP2  | Enrichr CHEA_2022: SOX2 20726797 ChIP-Seq SW620 Human | SOX2 |
| 1476 ZNF589   | Enrichr CHEA_2022: SOX2 20726797 ChIP-Seq SW620 Human | SOX2 |
| 1477 TIGD2    | Enrichr CHEA_2022: SOX2 20726797 ChIP-Seq SW620 Human | SOX2 |
| 1478 ZNF587   | Enrichr CHEA_2022: SOX2 20726797 ChIP-Seq SW620 Human | SOX2 |
| 1479 ZNF586   | Enrichr CHEA_2022: SOX2 20726797 ChIP-Seq SW620 Human | SOX2 |
| 1480 WWOX     | Enrichr CHEA_2022: SOX2 20726797 ChIP-Seq SW620 Human | SOX2 |
| 1481 SERPINB5 | Enrichr CHEA_2022: SOX2 20726797 ChIP-Seq SW620 Human | SOX2 |
| 1482 SF3A3    | Enrichr CHEA_2022: SOX2 20726797 ChIP-Seq SW620 Human | SOX2 |
| 1483 SERPINB3 | Enrichr CHEA_2022: SOX2 20726797 ChIP-Seq SW620 Human | SOX2 |
| 1484 IFNGR1   | Enrichr CHEA_2022: SOX2 20726797 ChIP-Seq SW620 Human | SOX2 |
| 1485 TMOD3    | Enrichr CHEA_2022: SOX2 20726797 ChIP-Seq SW620 Human | SOX2 |
| 1486 WWP1     | Enrichr CHEA_2022: SOX2 20726797 ChIP-Seq SW620 Human | SOX2 |
| 1487 LAPTM5   | Enrichr CHEA_2022: SOX2 20726797 ChIP-Seq SW620 Human | SOX2 |
| 1488 EN2      | Enrichr CHEA_2022: SOX2 20726797 ChIP-Seq SW620 Human | SOX2 |
| 1489 ADAT1    | Enrichr CHEA_2022: SOX2 20726797 ChIP-Seq SW620 Human | SOX2 |
| 1490 GTF2H2   | Enrichr CHEA_2022: SOX2 20726797 ChIP-Seq SW620 Human | SOX2 |
| 1491 NMNAT3   | Enrichr CHEA_2022: SOX2 20726797 ChIP-Seq SW620 Human | SOX2 |
| 1492 TTC7B    | Enrichr CHEA_2022: SOX2 20726797 ChIP-Seq SW620 Human | SOX2 |
| 1493 SERPINB8 | Enrichr CHEA_2022: SOX2 20726797 ChIP-Seq SW620 Human | SOX2 |
| 1494 SULF2    | Enrichr CHEA_2022: SOX2 20726797 ChIP-Seq SW620 Human | SOX2 |
| 1495 TMEM154  | Enrichr CHEA_2022: SOX2 20726797 ChIP-Seq SW620 Human | SOX2 |
| 1496 COL4A2   | Enrichr CHEA_2022: SOX2 20726797 ChIP-Seq SW620 Human | SOX2 |
| 1497 RFWD3    | Enrichr CHEA_2022: SOX2 20726797 ChIP-Seq SW620 Human | SOX2 |
| 1498 MSRB3    | Enrichr CHEA_2022: SOX2 20726797 ChIP-Seq SW620 Human | SOX2 |
| 1499 NOTUM    | Enrichr CHEA_2022: SOX2 20726797 ChIP-Seq SW620 Human | SOX2 |
| 1500 HBEGF    | Enrichr CHEA_2022: SOX2 20726797 ChIP-Seq SW620 Human | SOX2 |
| 1501 BSCL2    | Enrichr CHEA_2022: SOX2 20726797 ChIP-Seq SW620 Human | SOX2 |
| 1502 ZNF573   | Enrichr CHEA_2022: SOX2 20726797 ChIP-Seq SW620 Human | SOX2 |
| 1503 CCL14    | Enrichr CHEA_2022: SOX2 20726797 ChIP-Seq SW620 Human | SOX2 |
| 1504 PFAS     | Enrichr CHEA_2022: SOX2 20726797 ChIP-Seq SW620 Human | SOX2 |
| 1505 ZNF572   | Enrichr CHEA_2022: SOX2 20726797 ChIP-Seq SW620 Human | SOX2 |
| 1506 OGG1     | Enrichr CHEA_2022: SOX2 20726797 ChIP-Seq SW620 Human | SOX2 |
| 1507 TGFB11   | Enrichr CHEA_2022: SOX2 20726797 ChIP-Seq SW620 Human | SOX2 |
| 1508 TMEM141  | Enrichr CHEA_2022: SOX2 20726797 ChIP-Seq SW620 Human | SOX2 |
| 1509 PRSS23   | Enrichr CHEA_2022: SOX2 20726797 ChIP-Seq SW620 Human | SOX2 |
| 1510 RNF135   | Enrichr CHEA_2022: SOX2 20726797 ChIP-Seq SW620 Human | SOX2 |
| 1511 FAM102B  | Enrichr CHEA_2022: SOX2 20726797 ChIP-Seq SW620 Human | SOX2 |
| 1512 RNF139   | Enrichr CHEA_2022: SOX2 20726797 ChIP-Seq SW620 Human | SOX2 |
| 1513 CHN2     | Enrichr CHEA_2022: SOX2 20726797 ChIP-Seq SW620 Human | SOX2 |
| 1514 METTL7A  | Enrichr CHEA_2022: SOX2 20726797 ChIP-Seq SW620 Human | SOX2 |
| 1515 CHN1     | Enrichr CHEA_2022: SOX2 20726797 ChIP-Seq SW620 Human | SOX2 |
| 1516 GCNT3    | Enrichr CHEA_2022: SOX2 20726797 ChIP-Seq SW620 Human | SOX2 |
| 1517 ANXA9    | Enrichr CHEA_2022: SOX2 20726797 ChIP-Seq SW620 Human | SOX2 |
| 1518 RIOK2    | Enrichr CHEA_2022: SOX2 20726797 ChIP-Seq SW620 Human | SOX2 |
| 1519 ANKRD50  | Enrichr CHEA_2022: SOX2 20726797 ChIP-Seq SW620 Human | SOX2 |
| 1520 ZNF567   | Enrichr CHEA_2022: SOX2 20726797 ChIP-Seq SW620 Human | SOX2 |
| 1521 BRD7     | Enrichr CHEA_2022: SOX2 20726797 ChIP-Seq SW620 Human | SOX2 |
| 1522 TNKS1BP1 | Enrichr CHEA_2022: SOX2 20726797 ChIP-Seq SW620 Human | SOX2 |
| 1523 ZNF565   | Enrichr CHEA_2022: SOX2 20726797 ChIP-Seq SW620 Human | SOX2 |

|              |                                                       |      |
|--------------|-------------------------------------------------------|------|
| 1524 RNF43   | Enrichr CHEA_2022: SOX2 20726797 ChIP-Seq SW620 Human | SOX2 |
| 1525 SEMA4B  | Enrichr CHEA_2022: SOX2 20726797 ChIP-Seq SW620 Human | SOX2 |
| 1526 PHLDA1  | Enrichr CHEA_2022: SOX2 20726797 ChIP-Seq SW620 Human | SOX2 |
| 1527 BRF2    | Enrichr CHEA_2022: SOX2 20726797 ChIP-Seq SW620 Human | SOX2 |
| 1528 SEMA4F  | Enrichr CHEA_2022: SOX2 20726797 ChIP-Seq SW620 Human | SOX2 |
| 1529 SEMA4C  | Enrichr CHEA_2022: SOX2 20726797 ChIP-Seq SW620 Human | SOX2 |
| 1530 PLCL2   | Enrichr CHEA_2022: SOX2 20726797 ChIP-Seq SW620 Human | SOX2 |
| 1531 SEMA4D  | Enrichr CHEA_2022: SOX2 20726797 ChIP-Seq SW620 Human | SOX2 |
| 1532 GPT2    | Enrichr CHEA_2022: SOX2 20726797 ChIP-Seq SW620 Human | SOX2 |
| 1533 FAM24B  | Enrichr CHEA_2022: SOX2 20726797 ChIP-Seq SW620 Human | SOX2 |
| 1534 CYBRD1  | Enrichr CHEA_2022: SOX2 20726797 ChIP-Seq SW620 Human | SOX2 |
| 1535 SEMA4G  | Enrichr CHEA_2022: SOX2 20726797 ChIP-Seq SW620 Human | SOX2 |
| 1536 CNOT7   | Enrichr CHEA_2022: SOX2 20726797 ChIP-Seq SW620 Human | SOX2 |
| 1537 SYPL1   | Enrichr CHEA_2022: SOX2 20726797 ChIP-Seq SW620 Human | SOX2 |
| 1538 RNF183  | Enrichr CHEA_2022: SOX2 20726797 ChIP-Seq SW620 Human | SOX2 |
| 1539 TUSC1   | Enrichr CHEA_2022: SOX2 20726797 ChIP-Seq SW620 Human | SOX2 |
| 1540 ANKRD22 | Enrichr CHEA_2022: SOX2 20726797 ChIP-Seq SW620 Human | SOX2 |
| 1541 ZNF559  | Enrichr CHEA_2022: SOX2 20726797 ChIP-Seq SW620 Human | SOX2 |
| 1542 TNIK    | Enrichr CHEA_2022: SOX2 20726797 ChIP-Seq SW620 Human | SOX2 |
| 1543 SLC28A3 | Enrichr CHEA_2022: SOX2 20726797 ChIP-Seq SW620 Human | SOX2 |
| 1544 RNF32   | Enrichr CHEA_2022: SOX2 20726797 ChIP-Seq SW620 Human | SOX2 |
| 1545 DGKH    | Enrichr CHEA_2022: SOX2 20726797 ChIP-Seq SW620 Human | SOX2 |
| 1546 ZNF552  | Enrichr CHEA_2022: SOX2 20726797 ChIP-Seq SW620 Human | SOX2 |
| 1547 ZNF551  | Enrichr CHEA_2022: SOX2 20726797 ChIP-Seq SW620 Human | SOX2 |
| 1548 COL16A1 | Enrichr CHEA_2022: SOX2 20726797 ChIP-Seq SW620 Human | SOX2 |
| 1549 PHLDB2  | Enrichr CHEA_2022: SOX2 20726797 ChIP-Seq SW620 Human | SOX2 |
| 1550 ZNF550  | Enrichr CHEA_2022: SOX2 20726797 ChIP-Seq SW620 Human | SOX2 |
| 1551 ANKRD37 | Enrichr CHEA_2022: SOX2 20726797 ChIP-Seq SW620 Human | SOX2 |
| 1552 AHR     | Enrichr CHEA_2022: SOX2 20726797 ChIP-Seq SW620 Human | SOX2 |
| 1553 METRNL  | Enrichr CHEA_2022: SOX2 20726797 ChIP-Seq SW620 Human | SOX2 |
| 1554 TANK    | Enrichr CHEA_2022: SOX2 20726797 ChIP-Seq SW620 Human | SOX2 |
| 1555 PYCARD  | Enrichr CHEA_2022: SOX2 20726797 ChIP-Seq SW620 Human | SOX2 |
| 1556 AP3M2   | Enrichr CHEA_2022: SOX2 20726797 ChIP-Seq SW620 Human | SOX2 |
| 1557 ZFP36   | Enrichr CHEA_2022: SOX2 20726797 ChIP-Seq SW620 Human | SOX2 |
| 1558 TUBB6   | Enrichr CHEA_2022: SOX2 20726797 ChIP-Seq SW620 Human | SOX2 |
| 1559 ZFP30   | Enrichr CHEA_2022: SOX2 20726797 ChIP-Seq SW620 Human | SOX2 |
| 1560 GRB14   | Enrichr CHEA_2022: SOX2 20726797 ChIP-Seq SW620 Human | SOX2 |
| 1561 ZNF548  | Enrichr CHEA_2022: SOX2 20726797 ChIP-Seq SW620 Human | SOX2 |
| 1562 ACS1    | Enrichr CHEA_2022: SOX2 20726797 ChIP-Seq SW620 Human | SOX2 |
| 1563 IGF1P2  | Enrichr CHEA_2022: SOX2 20726797 ChIP-Seq SW620 Human | SOX2 |
| 1564 BIVM    | Enrichr CHEA_2022: SOX2 20726797 ChIP-Seq SW620 Human | SOX2 |
| 1565 F2R     | Enrichr CHEA_2022: SOX2 20726797 ChIP-Seq SW620 Human | SOX2 |
| 1566 RNF170  | Enrichr CHEA_2022: SOX2 20726797 ChIP-Seq SW620 Human | SOX2 |
| 1567 ADRA2A  | Enrichr CHEA_2022: SOX2 20726797 ChIP-Seq SW620 Human | SOX2 |
| 1568 DUSP23  | Enrichr CHEA_2022: SOX2 20726797 ChIP-Seq SW620 Human | SOX2 |
| 1569 ARMCX3  | Enrichr CHEA_2022: SOX2 20726797 ChIP-Seq SW620 Human | SOX2 |
| 1570 TRAF5   | Enrichr CHEA_2022: SOX2 20726797 ChIP-Seq SW620 Human | SOX2 |
| 1571 RHEB    | Enrichr CHEA_2022: SOX2 20726797 ChIP-Seq SW620 Human | SOX2 |
| 1572 TRAF4   | Enrichr CHEA_2022: SOX2 20726797 ChIP-Seq SW620 Human | SOX2 |
| 1573 ARMCX6  | Enrichr CHEA_2022: SOX2 20726797 ChIP-Seq SW620 Human | SOX2 |
| 1574 DGKQ    | Enrichr CHEA_2022: SOX2 20726797 ChIP-Seq SW620 Human | SOX2 |
| 1575 ILDR1   | Enrichr CHEA_2022: SOX2 20726797 ChIP-Seq SW620 Human | SOX2 |
| 1576 ERF     | Enrichr CHEA_2022: SOX2 20726797 ChIP-Seq SW620 Human | SOX2 |
| 1577 ESAM    | Enrichr CHEA_2022: SOX2 20726797 ChIP-Seq SW620 Human | SOX2 |
| 1578 RLN2    | Enrichr CHEA_2022: SOX2 20726797 ChIP-Seq SW620 Human | SOX2 |
| 1579 ZNF530  | Enrichr CHEA_2022: SOX2 20726797 ChIP-Seq SW620 Human | SOX2 |
| 1580 IRS1    | Enrichr CHEA_2022: SOX2 20726797 ChIP-Seq SW620 Human | SOX2 |
| 1581 FMR1    | Enrichr CHEA_2022: SOX2 20726797 ChIP-Seq SW620 Human | SOX2 |
| 1582 BR13    | Enrichr CHEA_2022: SOX2 20726797 ChIP-Seq SW620 Human | SOX2 |
| 1583 AK5     | Enrichr CHEA_2022: SOX2 20726797 ChIP-Seq SW620 Human | SOX2 |
| 1584 MYOM3   | Enrichr CHEA_2022: SOX2 20726797 ChIP-Seq SW620 Human | SOX2 |

|               |                                                       |      |
|---------------|-------------------------------------------------------|------|
| 1585 ABHD12   | Enrichr CHEA_2022: SOX2 20726797 ChIP-Seq SW620 Human | SOX2 |
| 1586 BAG4     | Enrichr CHEA_2022: SOX2 20726797 ChIP-Seq SW620 Human | SOX2 |
| 1587 ABHD10   | Enrichr CHEA_2022: SOX2 20726797 ChIP-Seq SW620 Human | SOX2 |
| 1588 ZNF529   | Enrichr CHEA_2022: SOX2 20726797 ChIP-Seq SW620 Human | SOX2 |
| 1589 ANKRD10  | Enrichr CHEA_2022: SOX2 20726797 ChIP-Seq SW620 Human | SOX2 |
| 1590 SLC37A1  | Enrichr CHEA_2022: SOX2 20726797 ChIP-Seq SW620 Human | SOX2 |
| 1591 GPX3     | Enrichr CHEA_2022: SOX2 20726797 ChIP-Seq SW620 Human | SOX2 |
| 1592 GPX2     | Enrichr CHEA_2022: SOX2 20726797 ChIP-Seq SW620 Human | SOX2 |
| 1593 DTX3L    | Enrichr CHEA_2022: SOX2 20726797 ChIP-Seq SW620 Human | SOX2 |
| 1594 GPX7     | Enrichr CHEA_2022: SOX2 20726797 ChIP-Seq SW620 Human | SOX2 |
| 1595 SMARCE1  | Enrichr CHEA_2022: SOX2 20726797 ChIP-Seq SW620 Human | SOX2 |
| 1596 CFLAR    | Enrichr CHEA_2022: SOX2 20726797 ChIP-Seq SW620 Human | SOX2 |
| 1597 ASNS     | Enrichr CHEA_2022: SOX2 20726797 ChIP-Seq SW620 Human | SOX2 |
| 1598 PTPN13   | Enrichr CHEA_2022: SOX2 20726797 ChIP-Seq SW620 Human | SOX2 |
| 1599 CDC42BPA | Enrichr CHEA_2022: SOX2 20726797 ChIP-Seq SW620 Human | SOX2 |
| 1600 TPCN2    | Enrichr CHEA_2022: SOX2 20726797 ChIP-Seq SW620 Human | SOX2 |
| 1601 CUL4A    | Enrichr CHEA_2022: SOX2 20726797 ChIP-Seq SW620 Human | SOX2 |
| 1602 SERPINI1 | Enrichr CHEA_2022: SOX2 20726797 ChIP-Seq SW620 Human | SOX2 |
| 1603 NES      | Enrichr CHEA_2022: SOX2 20726797 ChIP-Seq SW620 Human | SOX2 |
| 1604 SERINC2  | Enrichr CHEA_2022: SOX2 20726797 ChIP-Seq SW620 Human | SOX2 |
| 1605 ZNF512   | Enrichr CHEA_2022: SOX2 20726797 ChIP-Seq SW620 Human | SOX2 |
| 1606 EIF4E2   | Enrichr CHEA_2022: SOX2 20726797 ChIP-Seq SW620 Human | SOX2 |
| 1607 METAP1   | Enrichr CHEA_2022: SOX2 20726797 ChIP-Seq SW620 Human | SOX2 |
| 1608 METAP2   | Enrichr CHEA_2022: SOX2 20726797 ChIP-Seq SW620 Human | SOX2 |
| 1609 SERINC5  | Enrichr CHEA_2022: SOX2 20726797 ChIP-Seq SW620 Human | SOX2 |
| 1610 TNKS     | Enrichr CHEA_2022: SOX2 20726797 ChIP-Seq SW620 Human | SOX2 |
| 1611 ITPR2    | Enrichr CHEA_2022: SOX2 20726797 ChIP-Seq SW620 Human | SOX2 |
| 1612 ITPR3    | Enrichr CHEA_2022: SOX2 20726797 ChIP-Seq SW620 Human | SOX2 |
| 1613 DUSP14   | Enrichr CHEA_2022: SOX2 20726797 ChIP-Seq SW620 Human | SOX2 |
| 1614 RAD21    | Enrichr CHEA_2022: SOX2 20726797 ChIP-Seq SW620 Human | SOX2 |
| 1615 PSAP     | Enrichr CHEA_2022: SOX2 20726797 ChIP-Seq SW620 Human | SOX2 |
| 1616 WASF1    | Enrichr CHEA_2022: SOX2 20726797 ChIP-Seq SW620 Human | SOX2 |
| 1617 SKIL     | Enrichr CHEA_2022: SOX2 20726797 ChIP-Seq SW620 Human | SOX2 |
| 1618 WASF3    | Enrichr CHEA_2022: SOX2 20726797 ChIP-Seq SW620 Human | SOX2 |
| 1619 IRX2     | Enrichr CHEA_2022: SOX2 20726797 ChIP-Seq SW620 Human | SOX2 |
| 1620 SPAG7    | Enrichr CHEA_2022: SOX2 20726797 ChIP-Seq SW620 Human | SOX2 |
| 1621 SPAG4    | Enrichr CHEA_2022: SOX2 20726797 ChIP-Seq SW620 Human | SOX2 |
| 1622 AMT      | Enrichr CHEA_2022: SOX2 20726797 ChIP-Seq SW620 Human | SOX2 |
| 1623 MND1     | Enrichr CHEA_2022: SOX2 20726797 ChIP-Seq SW620 Human | SOX2 |
| 1624 RAD50    | Enrichr CHEA_2022: SOX2 20726797 ChIP-Seq SW620 Human | SOX2 |
| 1625 RNF20    | Enrichr CHEA_2022: SOX2 20726797 ChIP-Seq SW620 Human | SOX2 |
| 1626 KLF2     | Enrichr CHEA_2022: SOX2 20726797 ChIP-Seq SW620 Human | SOX2 |
| 1627 ZFP90    | Enrichr CHEA_2022: SOX2 20726797 ChIP-Seq SW620 Human | SOX2 |
| 1628 RAD52    | Enrichr CHEA_2022: SOX2 20726797 ChIP-Seq SW620 Human | SOX2 |
| 1629 MGAT4B   | Enrichr CHEA_2022: SOX2 20726797 ChIP-Seq SW620 Human | SOX2 |
| 1630 ASPH     | Enrichr CHEA_2022: SOX2 20726797 ChIP-Seq SW620 Human | SOX2 |
| 1631 CD109    | Enrichr CHEA_2022: SOX2 20726797 ChIP-Seq SW620 Human | SOX2 |
| 1632 EVL      | Enrichr CHEA_2022: SOX2 20726797 ChIP-Seq SW620 Human | SOX2 |
| 1633 CLEC2D   | Enrichr CHEA_2022: SOX2 20726797 ChIP-Seq SW620 Human | SOX2 |
| 1634 SMPDL3B  | Enrichr CHEA_2022: SOX2 20726797 ChIP-Seq SW620 Human | SOX2 |
| 1635 FOLR1    | Enrichr CHEA_2022: SOX2 20726797 ChIP-Seq SW620 Human | SOX2 |
| 1636 SEMA3A   | Enrichr CHEA_2022: SOX2 20726797 ChIP-Seq SW620 Human | SOX2 |
| 1637 LSP1     | Enrichr CHEA_2022: SOX2 20726797 ChIP-Seq SW620 Human | SOX2 |
| 1638 SEMA3C   | Enrichr CHEA_2022: SOX2 20726797 ChIP-Seq SW620 Human | SOX2 |
| 1639 SEMA3F   | Enrichr CHEA_2022: SOX2 20726797 ChIP-Seq SW620 Human | SOX2 |
| 1640 SGCE     | Enrichr CHEA_2022: SOX2 20726797 ChIP-Seq SW620 Human | SOX2 |
| 1641 OPA1     | Enrichr CHEA_2022: SOX2 20726797 ChIP-Seq SW620 Human | SOX2 |
| 1642 OPA3     | Enrichr CHEA_2022: SOX2 20726797 ChIP-Seq SW620 Human | SOX2 |
| 1643 NHS      | Enrichr CHEA_2022: SOX2 20726797 ChIP-Seq SW620 Human | SOX2 |
| 1644 PTPRN2   | Enrichr CHEA_2022: SOX2 20726797 ChIP-Seq SW620 Human | SOX2 |
| 1645 CDON     | Enrichr CHEA_2022: SOX2 20726797 ChIP-Seq SW620 Human | SOX2 |

|               |                                                       |      |
|---------------|-------------------------------------------------------|------|
| 1646 SS18L1   | Enrichr CHEA_2022: SOX2 20726797 ChIP-Seq SW620 Human | SOX2 |
| 1647 SP110    | Enrichr CHEA_2022: SOX2 20726797 ChIP-Seq SW620 Human | SOX2 |
| 1648 ACSL1    | Enrichr CHEA_2022: SOX2 20726797 ChIP-Seq SW620 Human | SOX2 |
| 1649 RUNX1    | Enrichr CHEA_2022: SOX2 20726797 ChIP-Seq SW620 Human | SOX2 |
| 1650 RECQL    | Enrichr CHEA_2022: SOX2 20726797 ChIP-Seq SW620 Human | SOX2 |
| 1651 ACSL5    | Enrichr CHEA_2022: SOX2 20726797 ChIP-Seq SW620 Human | SOX2 |
| 1652 RUNX3    | Enrichr CHEA_2022: SOX2 20726797 ChIP-Seq SW620 Human | SOX2 |
| 1653 MTUS1    | Enrichr CHEA_2022: SOX2 20726797 ChIP-Seq SW620 Human | SOX2 |
| 1654 RUNX2    | Enrichr CHEA_2022: SOX2 20726797 ChIP-Seq SW620 Human | SOX2 |
| 1655 MALL     | Enrichr CHEA_2022: SOX2 20726797 ChIP-Seq SW620 Human | SOX2 |
| 1656 RHEBL1   | Enrichr CHEA_2022: SOX2 20726797 ChIP-Seq SW620 Human | SOX2 |
| 1657 XRN2     | Enrichr CHEA_2022: SOX2 20726797 ChIP-Seq SW620 Human | SOX2 |
| 1658 RRAGD    | Enrichr CHEA_2022: SOX2 20726797 ChIP-Seq SW620 Human | SOX2 |
| 1659 TMCC1    | Enrichr CHEA_2022: SOX2 20726797 ChIP-Seq SW620 Human | SOX2 |
| 1660 GUF1     | Enrichr CHEA_2022: SOX2 20726797 ChIP-Seq SW620 Human | SOX2 |
| 1661 TFAM     | Enrichr CHEA_2022: SOX2 20726797 ChIP-Seq SW620 Human | SOX2 |
| 1662 PFN2     | Enrichr CHEA_2022: SOX2 20726797 ChIP-Seq SW620 Human | SOX2 |
| 1663 SPRR3    | Enrichr CHEA_2022: SOX2 20726797 ChIP-Seq SW620 Human | SOX2 |
| 1664 GLS2     | Enrichr CHEA_2022: SOX2 20726797 ChIP-Seq SW620 Human | SOX2 |
| 1665 CMAS     | Enrichr CHEA_2022: SOX2 20726797 ChIP-Seq SW620 Human | SOX2 |
| 1666 VIPR1    | Enrichr CHEA_2022: SOX2 20726797 ChIP-Seq SW620 Human | SOX2 |
| 1667 GLRX     | Enrichr CHEA_2022: SOX2 20726797 ChIP-Seq SW620 Human | SOX2 |
| 1668 RAD54B   | Enrichr CHEA_2022: SOX2 20726797 ChIP-Seq SW620 Human | SOX2 |
| 1669 ANTXR2   | Enrichr CHEA_2022: SOX2 20726797 ChIP-Seq SW620 Human | SOX2 |
| 1670 CARHSP1  | Enrichr CHEA_2022: SOX2 20726797 ChIP-Seq SW620 Human | SOX2 |
| 1671 ANTXR1   | Enrichr CHEA_2022: SOX2 20726797 ChIP-Seq SW620 Human | SOX2 |
| 1672 CHAC1    | Enrichr CHEA_2022: SOX2 20726797 ChIP-Seq SW620 Human | SOX2 |
| 1673 MAL2     | Enrichr CHEA_2022: SOX2 20726797 ChIP-Seq SW620 Human | SOX2 |
| 1674 RABGAP1L | Enrichr CHEA_2022: SOX2 20726797 ChIP-Seq SW620 Human | SOX2 |
| 1675 AQR      | Enrichr CHEA_2022: SOX2 20726797 ChIP-Seq SW620 Human | SOX2 |
| 1676 LIX1L    | Enrichr CHEA_2022: SOX2 20726797 ChIP-Seq SW620 Human | SOX2 |
| 1677 GADD45B  | Enrichr CHEA_2022: SOX2 20726797 ChIP-Seq SW620 Human | SOX2 |
| 1678 GADD45A  | Enrichr CHEA_2022: SOX2 20726797 ChIP-Seq SW620 Human | SOX2 |
| 1679 SLC11A2  | Enrichr CHEA_2022: SOX2 20726797 ChIP-Seq SW620 Human | SOX2 |
| 1680 ACADSB   | Enrichr CHEA_2022: SOX2 20726797 ChIP-Seq SW620 Human | SOX2 |
| 1681 OVOL1    | Enrichr CHEA_2022: SOX2 20726797 ChIP-Seq SW620 Human | SOX2 |
| 1682 IL17RD   | Enrichr CHEA_2022: SOX2 20726797 ChIP-Seq SW620 Human | SOX2 |
| 1683 PARP14   | Enrichr CHEA_2022: SOX2 20726797 ChIP-Seq SW620 Human | SOX2 |
| 1684 INPP4B   | Enrichr CHEA_2022: SOX2 20726797 ChIP-Seq SW620 Human | SOX2 |
| 1685 PARP12   | Enrichr CHEA_2022: SOX2 20726797 ChIP-Seq SW620 Human | SOX2 |
| 1686 TSHZ1    | Enrichr CHEA_2022: SOX2 20726797 ChIP-Seq SW620 Human | SOX2 |
| 1687 TRMT12   | Enrichr CHEA_2022: SOX2 20726797 ChIP-Seq SW620 Human | SOX2 |
| 1688 ITM2C    | Enrichr CHEA_2022: SOX2 20726797 ChIP-Seq SW620 Human | SOX2 |
| 1689 CDS1     | Enrichr CHEA_2022: SOX2 20726797 ChIP-Seq SW620 Human | SOX2 |
| 1690 BEX2     | Enrichr CHEA_2022: SOX2 20726797 ChIP-Seq SW620 Human | SOX2 |
| 1691 ACSM3    | Enrichr CHEA_2022: SOX2 20726797 ChIP-Seq SW620 Human | SOX2 |
| 1692 MGST2    | Enrichr CHEA_2022: SOX2 20726797 ChIP-Seq SW620 Human | SOX2 |
| 1693 DIXDC1   | Enrichr CHEA_2022: SOX2 20726797 ChIP-Seq SW620 Human | SOX2 |
| 1694 EPM2AIP1 | Enrichr CHEA_2022: SOX2 20726797 ChIP-Seq SW620 Human | SOX2 |
| 1695 SOX2     | Enrichr CHEA_2022: SOX2 20726797 ChIP-Seq SW620 Human | SOX2 |
| 1696 INPP5F   | Enrichr CHEA_2022: SOX2 20726797 ChIP-Seq SW620 Human | SOX2 |
| 1697 ASL      | Enrichr CHEA_2022: SOX2 20726797 ChIP-Seq SW620 Human | SOX2 |
| 1698 ARL6IP5  | Enrichr CHEA_2022: SOX2 20726797 ChIP-Seq SW620 Human | SOX2 |
| 1699 TREX1    | Enrichr CHEA_2022: SOX2 20726797 ChIP-Seq SW620 Human | SOX2 |
| 1700 GLUL     | Enrichr CHEA_2022: SOX2 20726797 ChIP-Seq SW620 Human | SOX2 |
| 1701 GOLGA7   | Enrichr CHEA_2022: SOX2 20726797 ChIP-Seq SW620 Human | SOX2 |
| 1702 TNS4     | Enrichr CHEA_2022: SOX2 20726797 ChIP-Seq SW620 Human | SOX2 |
| 1703 SOX8     | Enrichr CHEA_2022: SOX2 20726797 ChIP-Seq SW620 Human | SOX2 |
| 1704 TNS3     | Enrichr CHEA_2022: SOX2 20726797 ChIP-Seq SW620 Human | SOX2 |
| 1705 CDR2     | Enrichr CHEA_2022: SOX2 20726797 ChIP-Seq SW620 Human | SOX2 |
| 1706 NMB      | Enrichr CHEA_2022: SOX2 20726797 ChIP-Seq SW620 Human | SOX2 |

|               |                                                       |      |
|---------------|-------------------------------------------------------|------|
| 1707 TSC22D2  | Enrichr CHEA_2022: SOX2 20726797 ChIP-Seq SW620 Human | SOX2 |
| 1708 NMI      | Enrichr CHEA_2022: SOX2 20726797 ChIP-Seq SW620 Human | SOX2 |
| 1709 NME3     | Enrichr CHEA_2022: SOX2 20726797 ChIP-Seq SW620 Human | SOX2 |
| 1710 TFEB     | Enrichr CHEA_2022: SOX2 20726797 ChIP-Seq SW620 Human | SOX2 |
| 1711 KRT13    | Enrichr CHEA_2022: SOX2 20726797 ChIP-Seq SW620 Human | SOX2 |
| 1712 NME4     | Enrichr CHEA_2022: SOX2 20726797 ChIP-Seq SW620 Human | SOX2 |
| 1713 TUBE1    | Enrichr CHEA_2022: SOX2 20726797 ChIP-Seq SW620 Human | SOX2 |
| 1714 GNG12    | Enrichr CHEA_2022: SOX2 20726797 ChIP-Seq SW620 Human | SOX2 |
| 1715 PDZK1IP1 | Enrichr CHEA_2022: SOX2 20726797 ChIP-Seq SW620 Human | SOX2 |
| 1716 RAD51C   | Enrichr CHEA_2022: SOX2 20726797 ChIP-Seq SW620 Human | SOX2 |
| 1717 RHOQ     | Enrichr CHEA_2022: SOX2 20726797 ChIP-Seq SW620 Human | SOX2 |
| 1718 CEACAM1  | Enrichr CHEA_2022: SOX2 20726797 ChIP-Seq SW620 Human | SOX2 |
| 1719 NME7     | Enrichr CHEA_2022: SOX2 20726797 ChIP-Seq SW620 Human | SOX2 |
| 1720 R3HCC1   | Enrichr CHEA_2022: SOX2 20726797 ChIP-Seq SW620 Human | SOX2 |
| 1721 KRT17    | Enrichr CHEA_2022: SOX2 20726797 ChIP-Seq SW620 Human | SOX2 |
| 1722 RPUSD3   | Enrichr CHEA_2022: SOX2 20726797 ChIP-Seq SW620 Human | SOX2 |
| 1723 CEACAM6  | Enrichr CHEA_2022: SOX2 20726797 ChIP-Seq SW620 Human | SOX2 |
| 1724 RPUSD4   | Enrichr CHEA_2022: SOX2 20726797 ChIP-Seq SW620 Human | SOX2 |
| 1725 ATM      | Enrichr CHEA_2022: SOX2 20726797 ChIP-Seq SW620 Human | SOX2 |
| 1726 TFF3     | Enrichr CHEA_2022: SOX2 20726797 ChIP-Seq SW620 Human | SOX2 |
| 1727 CAMK1    | Enrichr CHEA_2022: SOX2 20726797 ChIP-Seq SW620 Human | SOX2 |
| 1728 TFF1     | Enrichr CHEA_2022: SOX2 20726797 ChIP-Seq SW620 Human | SOX2 |
| 1729 SGK2     | Enrichr CHEA_2022: SOX2 20726797 ChIP-Seq SW620 Human | SOX2 |
| 1730 AKR1B10  | Enrichr CHEA_2022: SOX2 20726797 ChIP-Seq SW620 Human | SOX2 |
| 1731 RHOU     | Enrichr CHEA_2022: SOX2 20726797 ChIP-Seq SW620 Human | SOX2 |
| 1732 TRAM2    | Enrichr CHEA_2022: SOX2 20726797 ChIP-Seq SW620 Human | SOX2 |
| 1733 CLIC5    | Enrichr CHEA_2022: SOX2 20726797 ChIP-Seq SW620 Human | SOX2 |
| 1734 CLIC4    | Enrichr CHEA_2022: SOX2 20726797 ChIP-Seq SW620 Human | SOX2 |
| 1735 MAOB     | Enrichr CHEA_2022: SOX2 20726797 ChIP-Seq SW620 Human | SOX2 |
| 1736 MAOA     | Enrichr CHEA_2022: SOX2 20726797 ChIP-Seq SW620 Human | SOX2 |
| 1737 IGSF3    | Enrichr CHEA_2022: SOX2 20726797 ChIP-Seq SW620 Human | SOX2 |
| 1738 KLK6     | Enrichr CHEA_2022: SOX2 20726797 ChIP-Seq SW620 Human | SOX2 |
| 1739 STC2     | Enrichr CHEA_2022: SOX2 20726797 ChIP-Seq SW620 Human | SOX2 |
| 1740 VLDLR    | Enrichr CHEA_2022: SOX2 20726797 ChIP-Seq SW620 Human | SOX2 |
| 1741 KRT20    | Enrichr CHEA_2022: SOX2 20726797 ChIP-Seq SW620 Human | SOX2 |
| 1742 NNT      | Enrichr CHEA_2022: SOX2 20726797 ChIP-Seq SW620 Human | SOX2 |
| 1743 HINT3    | Enrichr CHEA_2022: SOX2 20726797 ChIP-Seq SW620 Human | SOX2 |
| 1744 PITRM1   | Enrichr CHEA_2022: SOX2 20726797 ChIP-Seq SW620 Human | SOX2 |
| 1745 CLIC3    | Enrichr CHEA_2022: SOX2 20726797 ChIP-Seq SW620 Human | SOX2 |
| 1746 ARNT2    | Enrichr CHEA_2022: SOX2 20726797 ChIP-Seq SW620 Human | SOX2 |
| 1747 PRMT7    | Enrichr CHEA_2022: SOX2 20726797 ChIP-Seq SW620 Human | SOX2 |
| 1748 PRMT5    | Enrichr CHEA_2022: SOX2 20726797 ChIP-Seq SW620 Human | SOX2 |
| 1749 SCD5     | Enrichr CHEA_2022: SOX2 20726797 ChIP-Seq SW620 Human | SOX2 |
| 1750 RSL1D1   | Enrichr CHEA_2022: SOX2 20726797 ChIP-Seq SW620 Human | SOX2 |
| 1751 TJP2     | Enrichr CHEA_2022: SOX2 20726797 ChIP-Seq SW620 Human | SOX2 |
| 1752 TJP1     | Enrichr CHEA_2022: SOX2 20726797 ChIP-Seq SW620 Human | SOX2 |
| 1753 DNASE1L1 | Enrichr CHEA_2022: SOX2 20726797 ChIP-Seq SW620 Human | SOX2 |
| 1754 TJP3     | Enrichr CHEA_2022: SOX2 20726797 ChIP-Seq SW620 Human | SOX2 |
| 1755 DCP2     | Enrichr CHEA_2022: SOX2 20726797 ChIP-Seq SW620 Human | SOX2 |
| 1756 GDI1     | Enrichr CHEA_2022: SOX2 20726797 ChIP-Seq SW620 Human | SOX2 |
| 1757 PRIM1    | Enrichr CHEA_2022: SOX2 20726797 ChIP-Seq SW620 Human | SOX2 |
| 1758 HCCS     | Enrichr CHEA_2022: SOX2 20726797 ChIP-Seq SW620 Human | SOX2 |
| 1759 TRAK2    | Enrichr CHEA_2022: SOX2 20726797 ChIP-Seq SW620 Human | SOX2 |
| 1760 TRAK1    | Enrichr CHEA_2022: SOX2 20726797 ChIP-Seq SW620 Human | SOX2 |
| 1761 GYS1     | Enrichr CHEA_2022: SOX2 20726797 ChIP-Seq SW620 Human | SOX2 |
| 1762 NPW      | Enrichr CHEA_2022: SOX2 20726797 ChIP-Seq SW620 Human | SOX2 |
| 1763 MAP4K4   | Enrichr CHEA_2022: SOX2 20726797 ChIP-Seq SW620 Human | SOX2 |
| 1764 GDF11    | Enrichr CHEA_2022: SOX2 20726797 ChIP-Seq SW620 Human | SOX2 |
| 1765 CA13     | Enrichr CHEA_2022: SOX2 20726797 ChIP-Seq SW620 Human | SOX2 |
| 1766 BTNL9    | Enrichr CHEA_2022: SOX2 20726797 ChIP-Seq SW620 Human | SOX2 |
| 1767 CA12     | Enrichr CHEA_2022: SOX2 20726797 ChIP-Seq SW620 Human | SOX2 |

|               |                                                       |      |
|---------------|-------------------------------------------------------|------|
| 1768 TGFB2    | Enrichr CHEA_2022: SOX2 20726797 ChIP-Seq SW620 Human | SOX2 |
| 1769 KLRC4    | Enrichr CHEA_2022: SOX2 20726797 ChIP-Seq SW620 Human | SOX2 |
| 1770 EPDR1    | Enrichr CHEA_2022: SOX2 20726797 ChIP-Seq SW620 Human | SOX2 |
| 1771 ARID3A   | Enrichr CHEA_2022: SOX2 20726797 ChIP-Seq SW620 Human | SOX2 |
| 1772 ARHGAP27 | Enrichr CHEA_2022: SOX2 20726797 ChIP-Seq SW620 Human | SOX2 |
| 1773 BATF     | Enrichr CHEA_2022: SOX2 20726797 ChIP-Seq SW620 Human | SOX2 |
| 1774 ZNFX1    | Enrichr CHEA_2022: SOX2 20726797 ChIP-Seq SW620 Human | SOX2 |
| 1775 GNPDA2   | Enrichr CHEA_2022: SOX2 20726797 ChIP-Seq SW620 Human | SOX2 |
| 1776 AXL      | Enrichr CHEA_2022: SOX2 20726797 ChIP-Seq SW620 Human | SOX2 |
| 1777 TMEM139  | Enrichr CHEA_2022: SOX2 20726797 ChIP-Seq SW620 Human | SOX2 |
| 1778 FAS      | Enrichr CHEA_2022: SOX2 20726797 ChIP-Seq SW620 Human | SOX2 |
| 1779 ELMO3    | Enrichr CHEA_2022: SOX2 20726797 ChIP-Seq SW620 Human | SOX2 |
| 1780 ABCG1    | Enrichr CHEA_2022: SOX2 20726797 ChIP-Seq SW620 Human | SOX2 |
| 1781 GOLT1A   | Enrichr CHEA_2022: SOX2 20726797 ChIP-Seq SW620 Human | SOX2 |
| 1782 SCG2     | Enrichr CHEA_2022: SOX2 20726797 ChIP-Seq SW620 Human | SOX2 |
| 1783 STEAP2   | Enrichr CHEA_2022: SOX2 20726797 ChIP-Seq SW620 Human | SOX2 |
| 1784 ABCG2    | Enrichr CHEA_2022: SOX2 20726797 ChIP-Seq SW620 Human | SOX2 |
| 1785 FAIM     | Enrichr CHEA_2022: SOX2 20726797 ChIP-Seq SW620 Human | SOX2 |
| 1786 STEAP1   | Enrichr CHEA_2022: SOX2 20726797 ChIP-Seq SW620 Human | SOX2 |
| 1787 GALNT12  | Enrichr CHEA_2022: SOX2 20726797 ChIP-Seq SW620 Human | SOX2 |
| 1788 GALNT14  | Enrichr CHEA_2022: SOX2 20726797 ChIP-Seq SW620 Human | SOX2 |
| 1789 SLFN5    | Enrichr CHEA_2022: SOX2 20726797 ChIP-Seq SW620 Human | SOX2 |
| 1790 HDLBP    | Enrichr CHEA_2022: SOX2 20726797 ChIP-Seq SW620 Human | SOX2 |
| 1791 IFI6     | Enrichr CHEA_2022: SOX2 20726797 ChIP-Seq SW620 Human | SOX2 |
| 1792 MANEA    | Enrichr CHEA_2022: SOX2 20726797 ChIP-Seq SW620 Human | SOX2 |
| 1793 GALNT10  | Enrichr CHEA_2022: SOX2 20726797 ChIP-Seq SW620 Human | SOX2 |
| 1794 ZFP36L2  | Enrichr CHEA_2022: SOX2 20726797 ChIP-Seq SW620 Human | SOX2 |
| 1795 SCEL     | Enrichr CHEA_2022: SOX2 20726797 ChIP-Seq SW620 Human | SOX2 |
| 1796 KRT6A    | Enrichr CHEA_2022: SOX2 20726797 ChIP-Seq SW620 Human | SOX2 |
| 1797 TMEM125  | Enrichr CHEA_2022: SOX2 20726797 ChIP-Seq SW620 Human | SOX2 |
| 1798 MYH14    | Enrichr CHEA_2022: SOX2 20726797 ChIP-Seq SW620 Human | SOX2 |
| 1799 MYH10    | Enrichr CHEA_2022: SOX2 20726797 ChIP-Seq SW620 Human | SOX2 |
| 1800 CLASP2   | Enrichr CHEA_2022: SOX2 20726797 ChIP-Seq SW620 Human | SOX2 |
| 1801 OPN3     | Enrichr CHEA_2022: SOX2 20726797 ChIP-Seq SW620 Human | SOX2 |
| 1802 USP47    | Enrichr CHEA_2022: SOX2 20726797 ChIP-Seq SW620 Human | SOX2 |
| 1803 SMAD3    | Enrichr CHEA_2022: SOX2 20726797 ChIP-Seq SW620 Human | SOX2 |
| 1804 PDIA3    | Enrichr CHEA_2022: SOX2 20726797 ChIP-Seq SW620 Human | SOX2 |
| 1805 SMAD5    | Enrichr CHEA_2022: SOX2 20726797 ChIP-Seq SW620 Human | SOX2 |
| 1806 ARID5B   | Enrichr CHEA_2022: SOX2 20726797 ChIP-Seq SW620 Human | SOX2 |
| 1807 DNAJC12  | Enrichr CHEA_2022: SOX2 20726797 ChIP-Seq SW620 Human | SOX2 |
| 1808 ASPSCR1  | Enrichr CHEA_2022: SOX2 20726797 ChIP-Seq SW620 Human | SOX2 |
| 1809 CTPS2    | Enrichr CHEA_2022: SOX2 20726797 ChIP-Seq SW620 Human | SOX2 |
| 1810 CDYL     | Enrichr CHEA_2022: SOX2 20726797 ChIP-Seq SW620 Human | SOX2 |
| 1811 SMAD7    | Enrichr CHEA_2022: SOX2 20726797 ChIP-Seq SW620 Human | SOX2 |
| 1812 UPK3B    | Enrichr CHEA_2022: SOX2 20726797 ChIP-Seq SW620 Human | SOX2 |
| 1813 SMAD6    | Enrichr CHEA_2022: SOX2 20726797 ChIP-Seq SW620 Human | SOX2 |
| 1814 DNAJC18  | Enrichr CHEA_2022: SOX2 20726797 ChIP-Seq SW620 Human | SOX2 |
| 1815 SDCBP    | Enrichr CHEA_2022: SOX2 20726797 ChIP-Seq SW620 Human | SOX2 |
| 1816 PDIA6    | Enrichr CHEA_2022: SOX2 20726797 ChIP-Seq SW620 Human | SOX2 |
| 1817 ALDH3A2  | Enrichr CHEA_2022: SOX2 20726797 ChIP-Seq SW620 Human | SOX2 |
| 1818 PREPL    | Enrichr CHEA_2022: SOX2 20726797 ChIP-Seq SW620 Human | SOX2 |
| 1819 DLG4     | Enrichr CHEA_2022: SOX2 20726797 ChIP-Seq SW620 Human | SOX2 |
| 1820 CHMP7    | Enrichr CHEA_2022: SOX2 20726797 ChIP-Seq SW620 Human | SOX2 |
| 1821 ATP6V1A  | Enrichr CHEA_2022: SOX2 20726797 ChIP-Seq SW620 Human | SOX2 |
| 1822 DOCK4    | Enrichr CHEA_2022: SOX2 20726797 ChIP-Seq SW620 Human | SOX2 |
| 1823 USP54    | Enrichr CHEA_2022: SOX2 20726797 ChIP-Seq SW620 Human | SOX2 |
| 1824 SH3KBP1  | Enrichr CHEA_2022: SOX2 20726797 ChIP-Seq SW620 Human | SOX2 |
| 1825 SLC2A3   | Enrichr CHEA_2022: SOX2 20726797 ChIP-Seq SW620 Human | SOX2 |
| 1826 ARHGAP18 | Enrichr CHEA_2022: SOX2 20726797 ChIP-Seq SW620 Human | SOX2 |
| 1827 PLCXD2   | Enrichr CHEA_2022: SOX2 20726797 ChIP-Seq SW620 Human | SOX2 |
| 1828 MYL6B    | Enrichr CHEA_2022: SOX2 20726797 ChIP-Seq SW620 Human | SOX2 |



|               |                                                       |      |
|---------------|-------------------------------------------------------|------|
| 1829 ARHGAP23 | Enrichr CHEA_2022: SOX2 20726797 ChIP-Seq SW620 Human | SOX2 |
| 1830 PODXL    | Enrichr CHEA_2022: SOX2 20726797 ChIP-Seq SW620 Human | SOX2 |
| 1831 MAN2A2   | Enrichr CHEA_2022: SOX2 20726797 ChIP-Seq SW620 Human | SOX2 |
| 1832 TMEM107  | Enrichr CHEA_2022: SOX2 20726797 ChIP-Seq SW620 Human | SOX2 |
| 1833 ALDH3B1  | Enrichr CHEA_2022: SOX2 20726797 ChIP-Seq SW620 Human | SOX2 |
| 1834 COBLL1   | Enrichr CHEA_2022: SOX2 20726797 ChIP-Seq SW620 Human | SOX2 |
| 1835 PSPH     | Enrichr CHEA_2022: SOX2 20726797 ChIP-Seq SW620 Human | SOX2 |
| 1836 USP25    | Enrichr CHEA_2022: SOX2 20726797 ChIP-Seq SW620 Human | SOX2 |
| 1837 ABCC5    | Enrichr CHEA_2022: SOX2 20726797 ChIP-Seq SW620 Human | SOX2 |
| 1838 ABCC3    | Enrichr CHEA_2022: SOX2 20726797 ChIP-Seq SW620 Human | SOX2 |
| 1839 HSPA5    | Enrichr CHEA_2022: SOX2 20726797 ChIP-Seq SW620 Human | SOX2 |
| 1840 SMURF1   | Enrichr CHEA_2022: SOX2 20726797 ChIP-Seq SW620 Human | SOX2 |
| 1841 HSPA2    | Enrichr CHEA_2022: SOX2 20726797 ChIP-Seq SW620 Human | SOX2 |
| 1842 NFKBIZ   | Enrichr CHEA_2022: SOX2 20726797 ChIP-Seq SW620 Human | SOX2 |
| 1843 TGFBR3   | Enrichr CHEA_2022: SOX2 20726797 ChIP-Seq SW620 Human | SOX2 |
| 1844 NAP1L5   | Enrichr CHEA_2022: SOX2 20726797 ChIP-Seq SW620 Human | SOX2 |
| 1845 DDX19A   | Enrichr CHEA_2022: SOX2 20726797 ChIP-Seq SW620 Human | SOX2 |
| 1846 DDX19B   | Enrichr CHEA_2022: SOX2 20726797 ChIP-Seq SW620 Human | SOX2 |
| 1847 MEIS2    | Enrichr CHEA_2022: SOX2 20726797 ChIP-Seq SW620 Human | SOX2 |
| 1848 MNS1     | Enrichr CHEA_2022: SOX2 20726797 ChIP-Seq SW620 Human | SOX2 |
| 1849 PRTFDC1  | Enrichr CHEA_2022: SOX2 20726797 ChIP-Seq SW620 Human | SOX2 |
| 1850 B4GALT1  | Enrichr CHEA_2022: SOX2 20726797 ChIP-Seq SW620 Human | SOX2 |
| 1851 MCTP1    | Enrichr CHEA_2022: SOX2 20726797 ChIP-Seq SW620 Human | SOX2 |
| 1852 ABCB1    | Enrichr CHEA_2022: SOX2 20726797 ChIP-Seq SW620 Human | SOX2 |
| 1853 NID1     | Enrichr CHEA_2022: SOX2 20726797 ChIP-Seq SW620 Human | SOX2 |
| 1854 MTIF3    | Enrichr CHEA_2022: SOX2 20726797 ChIP-Seq SW620 Human | SOX2 |
| 1855 CXCL1    | Enrichr CHEA_2022: SOX2 20726797 ChIP-Seq SW620 Human | SOX2 |
| 1856 DTX4     | Enrichr CHEA_2022: SOX2 20726797 ChIP-Seq SW620 Human | SOX2 |
| 1857 ELAVL2   | Enrichr CHEA_2022: SOX2 20726797 ChIP-Seq SW620 Human | SOX2 |
| 1858 CXCL3    | Enrichr CHEA_2022: SOX2 20726797 ChIP-Seq SW620 Human | SOX2 |
| 1859 MOSPD1   | Enrichr CHEA_2022: SOX2 20726797 ChIP-Seq SW620 Human | SOX2 |
| 1860 CXCL6    | Enrichr CHEA_2022: SOX2 20726797 ChIP-Seq SW620 Human | SOX2 |
| 1861 DPP4     | Enrichr CHEA_2022: SOX2 20726797 ChIP-Seq SW620 Human | SOX2 |
| 1862 DPP7     | Enrichr CHEA_2022: SOX2 20726797 ChIP-Seq SW620 Human | SOX2 |
| 1863 NRIP1    | Enrichr CHEA_2022: SOX2 20726797 ChIP-Seq SW620 Human | SOX2 |
| 1864 NRIP3    | Enrichr CHEA_2022: SOX2 20726797 ChIP-Seq SW620 Human | SOX2 |
| 1865 ERBB2    | Enrichr CHEA_2022: SOX2 20726797 ChIP-Seq SW620 Human | SOX2 |
| 1866 PDE4A    | Enrichr CHEA_2022: SOX2 20726797 ChIP-Seq SW620 Human | SOX2 |
| 1867 USP31    | Enrichr CHEA_2022: SOX2 20726797 ChIP-Seq SW620 Human | SOX2 |
| 1868 TCFL5    | Enrichr CHEA_2022: SOX2 20726797 ChIP-Seq SW620 Human | SOX2 |
| 1869 ZNF185   | Enrichr CHEA_2022: SOX2 20726797 ChIP-Seq SW620 Human | SOX2 |
| 1870 PDE4DIP  | Enrichr CHEA_2022: SOX2 20726797 ChIP-Seq SW620 Human | SOX2 |
| 1871 RWDD1    | Enrichr CHEA_2022: SOX2 20726797 ChIP-Seq SW620 Human | SOX2 |
| 1872 PDE4D    | Enrichr CHEA_2022: SOX2 20726797 ChIP-Seq SW620 Human | SOX2 |
| 1873 ZNF182   | Enrichr CHEA_2022: SOX2 20726797 ChIP-Seq SW620 Human | SOX2 |
| 1874 KCTD1    | Enrichr CHEA_2022: SOX2 20726797 ChIP-Seq SW620 Human | SOX2 |
| 1875 KCTD6    | Enrichr CHEA_2022: SOX2 20726797 ChIP-Seq SW620 Human | SOX2 |
| 1876 SGPP2    | Enrichr CHEA_2022: SOX2 20726797 ChIP-Seq SW620 Human | SOX2 |
| 1877 CLDN7    | Enrichr CHEA_2022: SOX2 20726797 ChIP-Seq SW620 Human | SOX2 |
| 1878 FMNL2    | Enrichr CHEA_2022: SOX2 20726797 ChIP-Seq SW620 Human | SOX2 |
| 1879 CLDN4    | Enrichr CHEA_2022: SOX2 20726797 ChIP-Seq SW620 Human | SOX2 |
| 1880 PALLD    | Enrichr CHEA_2022: SOX2 20726797 ChIP-Seq SW620 Human | SOX2 |
| 1881 COL8A1   | Enrichr CHEA_2022: SOX2 20726797 ChIP-Seq SW620 Human | SOX2 |
| 1882 HKDC1    | Enrichr CHEA_2022: SOX2 20726797 ChIP-Seq SW620 Human | SOX2 |
| 1883 VDAC3    | Enrichr CHEA_2022: SOX2 20726797 ChIP-Seq SW620 Human | SOX2 |
| 1884 SPRY2    | Enrichr CHEA_2022: SOX2 20726797 ChIP-Seq SW620 Human | SOX2 |
| 1885 SSBP2    | Enrichr CHEA_2022: SOX2 20726797 ChIP-Seq SW620 Human | SOX2 |
| 1886 B4GALT6  | Enrichr CHEA_2022: SOX2 20726797 ChIP-Seq SW620 Human | SOX2 |
| 1887 CAMK2D   | Enrichr CHEA_2022: SOX2 20726797 ChIP-Seq SW620 Human | SOX2 |
| 1888 TSEN34   | Enrichr CHEA_2022: SOX2 20726797 ChIP-Seq SW620 Human | SOX2 |
| 1889 STEAP4   | Enrichr CHEA_2022: SOX2 20726797 ChIP-Seq SW620 Human | SOX2 |

|               |                                                                                     |      |
|---------------|-------------------------------------------------------------------------------------|------|
| 1890 ZNF174   | Enrichr CHEA_2022: SOX2 20726797 ChIP-Seq SW620 Human                               | SOX2 |
| 1891 USP11    | Enrichr CHEA_2022: SOX2 20726797 ChIP-Seq SW620 Human                               | SOX2 |
| 1892 USP12    | Enrichr CHEA_2022: SOX2 20726797 ChIP-Seq SW620 Human                               | SOX2 |
| 1893 USP13    | Enrichr CHEA_2022: SOX2 20726797 ChIP-Seq SW620 Human                               | SOX2 |
| 1894 CD163L1  | Enrichr CHEA_2022: SOX2 20726797 ChIP-Seq SW620 Human                               | SOX2 |
| 1895 HSPD1    | Enrichr CHEA_2022: SOX2 20726797 ChIP-Seq SW620 Human                               | SOX2 |
| 1896 USP18    | Enrichr CHEA_2022: SOX2 20726797 ChIP-Seq SW620 Human                               | SOX2 |
| 1897 SH3YL1   | Enrichr CHEA_2022: SOX2 20726797 ChIP-Seq SW620 Human                               | SOX2 |
| 1898 NT5DC1   | Enrichr CHEA_2022: SOX2 20726797 ChIP-Seq SW620 Human                               | SOX2 |
| 1899 PRRG4    | Enrichr CHEA_2022: SOX2 20726797 ChIP-Seq SW620 Human                               | SOX2 |
| 1900 POLB     | Enrichr CHEA_2022: SOX2 20726797 ChIP-Seq SW620 Human                               | SOX2 |
| 1901 VSIG2    | Enrichr CHEA_2022: SOX2 20726797 ChIP-Seq SW620 Human                               | SOX2 |
| 1902 VSIG1    | Enrichr CHEA_2022: SOX2 20726797 ChIP-Seq SW620 Human                               | SOX2 |
| 1903 CCNJL    | Enrichr TF Perturbations followed by expression: KLF5 20726797 ChIP-Seq SW620 Human | KLF5 |
| 1904 RBFOX3   | Enrichr TF Perturbations followed by expression: KLF5 20726797 ChIP-Seq SW620 Human | KLF5 |
| 1905 SP110    | Enrichr TF Perturbations followed by expression: KLF5 20726797 ChIP-Seq SW620 Human | KLF5 |
| 1906 HOMER2   | Enrichr TF Perturbations followed by expression: KLF5 20726797 ChIP-Seq SW620 Human | KLF5 |
| 1907 KRT4     | Enrichr TF Perturbations followed by expression: KLF5 20726797 ChIP-Seq SW620 Human | KLF5 |
| 1908 ARL14    | Enrichr TF Perturbations followed by expression: KLF5 20726797 ChIP-Seq SW620 Human | KLF5 |
| 1909 CKMT1A   | Enrichr TF Perturbations followed by expression: KLF5 20726797 ChIP-Seq SW620 Human | KLF5 |
| 1910 KRT7     | Enrichr TF Perturbations followed by expression: KLF5 20726797 ChIP-Seq SW620 Human | KLF5 |
| 1911 L1CAM    | Enrichr TF Perturbations followed by expression: KLF5 20726797 ChIP-Seq SW620 Human | KLF5 |
| 1912 MALL     | Enrichr TF Perturbations followed by expression: KLF5 20726797 ChIP-Seq SW620 Human | KLF5 |
| 1913 CAPN13   | Enrichr TF Perturbations followed by expression: KLF5 20726797 ChIP-Seq SW620 Human | KLF5 |
| 1914 LGALS12  | Enrichr TF Perturbations followed by expression: KLF5 20726797 ChIP-Seq SW620 Human | KLF5 |
| 1915 MYL9     | Enrichr TF Perturbations followed by expression: KLF5 20726797 ChIP-Seq SW620 Human | KLF5 |
| 1916 VIP      | Enrichr TF Perturbations followed by expression: KLF5 20726797 ChIP-Seq SW620 Human | KLF5 |
| 1917 EPHA4    | Enrichr TF Perturbations followed by expression: KLF5 20726797 ChIP-Seq SW620 Human | KLF5 |
| 1918 CHIC1    | Enrichr TF Perturbations followed by expression: KLF5 20726797 ChIP-Seq SW620 Human | KLF5 |
| 1919 SYNPO2   | Enrichr TF Perturbations followed by expression: KLF5 20726797 ChIP-Seq SW620 Human | KLF5 |
| 1920 MST1R    | Enrichr TF Perturbations followed by expression: KLF5 20726797 ChIP-Seq SW620 Human | KLF5 |
| 1921 CRACR2A  | Enrichr TF Perturbations followed by expression: KLF5 20726797 ChIP-Seq SW620 Human | KLF5 |
| 1922 MUC1     | Enrichr TF Perturbations followed by expression: KLF5 20726797 ChIP-Seq SW620 Human | KLF5 |
| 1923 STRIP2   | Enrichr TF Perturbations followed by expression: KLF5 20726797 ChIP-Seq SW620 Human | KLF5 |
| 1924 GNG3     | Enrichr TF Perturbations followed by expression: KLF5 20726797 ChIP-Seq SW620 Human | KLF5 |
| 1925 CREB3L4  | Enrichr TF Perturbations followed by expression: KLF5 20726797 ChIP-Seq SW620 Human | KLF5 |
| 1926 SV2C     | Enrichr TF Perturbations followed by expression: KLF5 20726797 ChIP-Seq SW620 Human | KLF5 |
| 1927 GMDS     | Enrichr TF Perturbations followed by expression: KLF5 20726797 ChIP-Seq SW620 Human | KLF5 |
| 1928 SPOCK3   | Enrichr TF Perturbations followed by expression: KLF5 20726797 ChIP-Seq SW620 Human | KLF5 |
| 1929 S100A14  | Enrichr TF Perturbations followed by expression: KLF5 20726797 ChIP-Seq SW620 Human | KLF5 |
| 1930 SUSD4    | Enrichr TF Perturbations followed by expression: KLF5 20726797 ChIP-Seq SW620 Human | KLF5 |
| 1931 SPOCK2   | Enrichr TF Perturbations followed by expression: KLF5 20726797 ChIP-Seq SW620 Human | KLF5 |
| 1932 MUC4     | Enrichr TF Perturbations followed by expression: KLF5 20726797 ChIP-Seq SW620 Human | KLF5 |
| 1933 SLC12A8  | Enrichr TF Perturbations followed by expression: KLF5 20726797 ChIP-Seq SW620 Human | KLF5 |
| 1934 PPARGC1B | Enrichr TF Perturbations followed by expression: KLF5 20726797 ChIP-Seq SW620 Human | KLF5 |
| 1935 FZD3     | Enrichr TF Perturbations followed by expression: KLF5 20726797 ChIP-Seq SW620 Human | KLF5 |
| 1936 PAQR6    | Enrichr TF Perturbations followed by expression: KLF5 20726797 ChIP-Seq SW620 Human | KLF5 |
| 1937 RAB27A   | Enrichr TF Perturbations followed by expression: KLF5 20726797 ChIP-Seq SW620 Human | KLF5 |
| 1938 CMBL     | Enrichr TF Perturbations followed by expression: KLF5 20726797 ChIP-Seq SW620 Human | KLF5 |
| 1939 ANK2     | Enrichr TF Perturbations followed by expression: KLF5 20726797 ChIP-Seq SW620 Human | KLF5 |
| 1940 FA2H     | Enrichr TF Perturbations followed by expression: KLF5 20726797 ChIP-Seq SW620 Human | KLF5 |
| 1941 CNKSR2   | Enrichr TF Perturbations followed by expression: KLF5 20726797 ChIP-Seq SW620 Human | KLF5 |
| 1942 POR      | Enrichr TF Perturbations followed by expression: KLF5 20726797 ChIP-Seq SW620 Human | KLF5 |
| 1943 RIPPLY3  | Enrichr TF Perturbations followed by expression: KLF5 20726797 ChIP-Seq SW620 Human | KLF5 |
| 1944 PPP1R1B  | Enrichr TF Perturbations followed by expression: KLF5 20726797 ChIP-Seq SW620 Human | KLF5 |
| 1945 SNHG11   | Enrichr TF Perturbations followed by expression: KLF5 20726797 ChIP-Seq SW620 Human | KLF5 |
| 1946 SPATS2L  | Enrichr TF Perturbations followed by expression: KLF5 20726797 ChIP-Seq SW620 Human | KLF5 |
| 1947 IGSF9B   | Enrichr TF Perturbations followed by expression: KLF5 20726797 ChIP-Seq SW620 Human | KLF5 |
| 1948 XKR4     | Enrichr TF Perturbations followed by expression: KLF5 20726797 ChIP-Seq SW620 Human | KLF5 |
| 1949 PTGES    | Enrichr TF Perturbations followed by expression: KLF5 20726797 ChIP-Seq SW620 Human | KLF5 |
| 1950 GLDC     | Enrichr TF Perturbations followed by expression: KLF5 20726797 ChIP-Seq SW620 Human | KLF5 |

|               |                                                                                     |      |
|---------------|-------------------------------------------------------------------------------------|------|
| 1951 ACSM3    | Enrichr TF Perturbations followed by expression: KLF5 20726797 ChIP-Seq SW620 Human | KLF5 |
| 1952 NECAB1   | Enrichr TF Perturbations followed by expression: KLF5 20726797 ChIP-Seq SW620 Human | KLF5 |
| 1953 HHIP     | Enrichr TF Perturbations followed by expression: KLF5 20726797 ChIP-Seq SW620 Human | KLF5 |
| 1954 NAPEPLD  | Enrichr TF Perturbations followed by expression: KLF5 20726797 ChIP-Seq SW620 Human | KLF5 |
| 1955 WFDC2    | Enrichr TF Perturbations followed by expression: KLF5 20726797 ChIP-Seq SW620 Human | KLF5 |
| 1956 RAPGEFL1 | Enrichr TF Perturbations followed by expression: KLF5 20726797 ChIP-Seq SW620 Human | KLF5 |
| 1957 SESTD1   | Enrichr TF Perturbations followed by expression: KLF5 20726797 ChIP-Seq SW620 Human | KLF5 |
| 1958 GATA2    | Enrichr TF Perturbations followed by expression: KLF5 20726797 ChIP-Seq SW620 Human | KLF5 |
| 1959 SOX2     | Enrichr TF Perturbations followed by expression: KLF5 20726797 ChIP-Seq SW620 Human | KLF5 |
| 1960 TSPAN8   | Enrichr TF Perturbations followed by expression: KLF5 20726797 ChIP-Seq SW620 Human | KLF5 |
| 1961 REG4     | Enrichr TF Perturbations followed by expression: KLF5 20726797 ChIP-Seq SW620 Human | KLF5 |
| 1962 FFAR4    | Enrichr TF Perturbations followed by expression: KLF5 20726797 ChIP-Seq SW620 Human | KLF5 |
| 1963 TNFSF10  | Enrichr TF Perturbations followed by expression: KLF5 20726797 ChIP-Seq SW620 Human | KLF5 |
| 1964 CD14     | Enrichr TF Perturbations followed by expression: KLF5 20726797 ChIP-Seq SW620 Human | KLF5 |
| 1965 TSPAN2   | Enrichr TF Perturbations followed by expression: KLF5 20726797 ChIP-Seq SW620 Human | KLF5 |
| 1966 PROM1    | Enrichr TF Perturbations followed by expression: KLF5 20726797 ChIP-Seq SW620 Human | KLF5 |
| 1967 LRRC26   | Enrichr TF Perturbations followed by expression: KLF5 20726797 ChIP-Seq SW620 Human | KLF5 |
| 1968 PCP4L1   | Enrichr TF Perturbations followed by expression: KLF5 20726797 ChIP-Seq SW620 Human | KLF5 |
| 1969 GSDMC    | Enrichr TF Perturbations followed by expression: KLF5 20726797 ChIP-Seq SW620 Human | KLF5 |
| 1970 TESC     | Enrichr TF Perturbations followed by expression: KLF5 20726797 ChIP-Seq SW620 Human | KLF5 |
| 1971 GP2      | Enrichr TF Perturbations followed by expression: KLF5 20726797 ChIP-Seq SW620 Human | KLF5 |
| 1972 TMC5     | Enrichr TF Perturbations followed by expression: KLF5 20726797 ChIP-Seq SW620 Human | KLF5 |
| 1973 SYN2     | Enrichr TF Perturbations followed by expression: KLF5 20726797 ChIP-Seq SW620 Human | KLF5 |
| 1974 GPRC5A   | Enrichr TF Perturbations followed by expression: KLF5 20726797 ChIP-Seq SW620 Human | KLF5 |
| 1975 TTLL7    | Enrichr TF Perturbations followed by expression: KLF5 20726797 ChIP-Seq SW620 Human | KLF5 |
| 1976 TOX3     | Enrichr TF Perturbations followed by expression: KLF5 20726797 ChIP-Seq SW620 Human | KLF5 |
| 1977 TPPP3    | Enrichr TF Perturbations followed by expression: KLF5 20726797 ChIP-Seq SW620 Human | KLF5 |
| 1978 ARHGEF4  | Enrichr TF Perturbations followed by expression: KLF5 20726797 ChIP-Seq SW620 Human | KLF5 |
| 1979 TFF3     | Enrichr TF Perturbations followed by expression: KLF5 20726797 ChIP-Seq SW620 Human | KLF5 |
| 1980 RET      | Enrichr TF Perturbations followed by expression: KLF5 20726797 ChIP-Seq SW620 Human | KLF5 |
| 1981 KLK1     | Enrichr TF Perturbations followed by expression: KLF5 20726797 ChIP-Seq SW620 Human | KLF5 |
| 1982 TMPRSS4  | Enrichr TF Perturbations followed by expression: KLF5 20726797 ChIP-Seq SW620 Human | KLF5 |
| 1983 NR1I3    | Enrichr TF Perturbations followed by expression: KLF5 20726797 ChIP-Seq SW620 Human | KLF5 |
| 1984 TMPRSS2  | Enrichr TF Perturbations followed by expression: KLF5 20726797 ChIP-Seq SW620 Human | KLF5 |
| 1985 HNF4G    | Enrichr TF Perturbations followed by expression: KLF5 20726797 ChIP-Seq SW620 Human | KLF5 |
| 1986 SLC7A14  | Enrichr TF Perturbations followed by expression: KLF5 20726797 ChIP-Seq SW620 Human | KLF5 |
| 1987 HEPACAM2 | Enrichr TF Perturbations followed by expression: KLF5 20726797 ChIP-Seq SW620 Human | KLF5 |
| 1988 HIF3A    | Enrichr TF Perturbations followed by expression: KLF5 20726797 ChIP-Seq SW620 Human | KLF5 |
| 1989 KRT23    | Enrichr TF Perturbations followed by expression: KLF5 20726797 ChIP-Seq SW620 Human | KLF5 |
| 1990 KIF19    | Enrichr TF Perturbations followed by expression: KLF5 20726797 ChIP-Seq SW620 Human | KLF5 |
| 1991 ACACB    | Enrichr TF Perturbations followed by expression: KLF5 20726797 ChIP-Seq SW620 Human | KLF5 |
| 1992 HSD11B2  | Enrichr TF Perturbations followed by expression: KLF5 20726797 ChIP-Seq SW620 Human | KLF5 |
| 1993 SULT1C2  | Enrichr TF Perturbations followed by expression: KLF5 20726797 ChIP-Seq SW620 Human | KLF5 |
| 1994 UCHL1    | Enrichr TF Perturbations followed by expression: KLF5 20726797 ChIP-Seq SW620 Human | KLF5 |
| 1995 MECOM    | Enrichr TF Perturbations followed by expression: KLF5 20726797 ChIP-Seq SW620 Human | KLF5 |
| 1996 RNF150   | Enrichr TF Perturbations followed by expression: KLF5 20726797 ChIP-Seq SW620 Human | KLF5 |
| 1997 QSOX1    | Enrichr TF Perturbations followed by expression: KLF5 20726797 ChIP-Seq SW620 Human | KLF5 |
| 1998 PLLP     | Enrichr TF Perturbations followed by expression: KLF5 20726797 ChIP-Seq SW620 Human | KLF5 |
| 1999 RAB6B    | Enrichr TF Perturbations followed by expression: KLF5 20726797 ChIP-Seq SW620 Human | KLF5 |
| 2000 CTSE     | Enrichr TF Perturbations followed by expression: KLF5 20726797 ChIP-Seq SW620 Human | KLF5 |
| 2001 DGAT2    | Enrichr TF Perturbations followed by expression: KLF5 20726797 ChIP-Seq SW620 Human | KLF5 |
| 2002 GSTO1    | Enrichr TF Perturbations followed by expression: KLF5 20726797 ChIP-Seq SW620 Human | KLF5 |
| 2003 ANO9     | Enrichr TF Perturbations followed by expression: KLF5 20726797 ChIP-Seq SW620 Human | KLF5 |
| 2004 SYP      | Enrichr TF Perturbations followed by expression: KLF5 20726797 ChIP-Seq SW620 Human | KLF5 |
| 2005 SORBS1   | Enrichr TF Perturbations followed by expression: KLF5 20726797 ChIP-Seq SW620 Human | KLF5 |
| 2006 SLC35G2  | Enrichr TF Perturbations followed by expression: KLF5 20726797 ChIP-Seq SW620 Human | KLF5 |
| 2007 F3       | Enrichr TF Perturbations followed by expression: KLF5 20726797 ChIP-Seq SW620 Human | KLF5 |
| 2008 CLIP4    | Enrichr TF Perturbations followed by expression: KLF5 20726797 ChIP-Seq SW620 Human | KLF5 |
| 2009 DHRS9    | Enrichr TF Perturbations followed by expression: KLF5 20726797 ChIP-Seq SW620 Human | KLF5 |
| 2010 KCNQ1    | Enrichr TF Perturbations followed by expression: KLF5 20726797 ChIP-Seq SW620 Human | KLF5 |
| 2011 FABP7    | Enrichr TF Perturbations followed by expression: KLF5 20726797 ChIP-Seq SW620 Human | KLF5 |



|                 |                                                                                     |      |
|-----------------|-------------------------------------------------------------------------------------|------|
| 2073 RAB3C      | Enrichr TF Perturbations followed by expression: KLF5 20726797 ChIP-Seq SW620 Human | KLF5 |
| 2074 KCNE3      | Enrichr TF Perturbations followed by expression: KLF5 20726797 ChIP-Seq SW620 Human | KLF5 |
| 2075 KCNE4      | Enrichr TF Perturbations followed by expression: KLF5 20726797 ChIP-Seq SW620 Human | KLF5 |
| 2076 UPK2       | Enrichr TF Perturbations followed by expression: KLF5 20726797 ChIP-Seq SW620 Human | KLF5 |
| 2077 TACSTD2    | Enrichr TF Perturbations followed by expression: KLF5 20726797 ChIP-Seq SW620 Human | KLF5 |
| 2078 FAM107A    | Enrichr TF Perturbations followed by expression: KLF5 20726797 ChIP-Seq SW620 Human | KLF5 |
| 2079 PPP1R9A    | Enrichr TF Perturbations followed by expression: KLF5 20726797 ChIP-Seq SW620 Human | KLF5 |
| 2080 GPR83      | Enrichr TF Perturbations followed by expression: KLF5 20726797 ChIP-Seq SW620 Human | KLF5 |
| 2081 PLCXD3     | Enrichr TF Perturbations followed by expression: KLF5 20726797 ChIP-Seq SW620 Human | KLF5 |
| 2082 ELFN1      | Enrichr TF Perturbations followed by expression: KLF5 20726797 ChIP-Seq SW620 Human | KLF5 |
| 2083 ACTG2      | Enrichr TF Perturbations followed by expression: KLF5 20726797 ChIP-Seq SW620 Human | KLF5 |
| 2084 EFEMP1     | Enrichr TF Perturbations followed by expression: KLF5 20726797 ChIP-Seq SW620 Human | KLF5 |
| 2085 CNN1       | Enrichr TF Perturbations followed by expression: KLF5 20726797 ChIP-Seq SW620 Human | KLF5 |
| 2086 ALDH3B2    | Enrichr TF Perturbations followed by expression: KLF5 20726797 ChIP-Seq SW620 Human | KLF5 |
| 2087 B3GALT2    | Enrichr TF Perturbations followed by expression: KLF5 20726797 ChIP-Seq SW620 Human | KLF5 |
| 2088 CHAD       | Enrichr TF Perturbations followed by expression: KLF5 20726797 ChIP-Seq SW620 Human | KLF5 |
| 2089 LEPR       | Enrichr TF Perturbations followed by expression: KLF5 20726797 ChIP-Seq SW620 Human | KLF5 |
| 2090 PRODH      | Enrichr TF Perturbations followed by expression: KLF5 20726797 ChIP-Seq SW620 Human | KLF5 |
| 2091 EFHD1      | Enrichr TF Perturbations followed by expression: KLF5 20726797 ChIP-Seq SW620 Human | KLF5 |
| 2092 SH3GL2     | Enrichr TF Perturbations followed by expression: KLF5 20726797 ChIP-Seq SW620 Human | KLF5 |
| 2093 SLC37A1    | Enrichr TF Perturbations followed by expression: KLF5 20726797 ChIP-Seq SW620 Human | KLF5 |
| 2094 GALNT7     | Enrichr TF Perturbations followed by expression: KLF5 20726797 ChIP-Seq SW620 Human | KLF5 |
| 2095 GALNT5     | Enrichr TF Perturbations followed by expression: KLF5 20726797 ChIP-Seq SW620 Human | KLF5 |
| 2096 HMGCS2     | Enrichr TF Perturbations followed by expression: KLF5 20726797 ChIP-Seq SW620 Human | KLF5 |
| 2097 GALNT4     | Enrichr TF Perturbations followed by expression: KLF5 20726797 ChIP-Seq SW620 Human | KLF5 |
| 2098 PEG3       | Enrichr TF Perturbations followed by expression: KLF5 20726797 ChIP-Seq SW620 Human | KLF5 |
| 2099 MYOCD      | Enrichr TF Perturbations followed by expression: KLF5 20726797 ChIP-Seq SW620 Human | KLF5 |
| 2100 CADPS      | Enrichr TF Perturbations followed by expression: KLF5 20726797 ChIP-Seq SW620 Human | KLF5 |
| 2101 TNFRSF19   | Enrichr TF Perturbations followed by expression: KLF5 20726797 ChIP-Seq SW620 Human | KLF5 |
| 2102 INMT       | Enrichr TF Perturbations followed by expression: KLF5 20726797 ChIP-Seq SW620 Human | KLF5 |
| 2103 ELF3       | Enrichr TF Perturbations followed by expression: KLF5 20726797 ChIP-Seq SW620 Human | KLF5 |
| 2104 TNIP3      | Enrichr TF Perturbations followed by expression: KLF5 20726797 ChIP-Seq SW620 Human | KLF5 |
| 2105 GNAO1      | Enrichr TF Perturbations followed by expression: KLF5 20726797 ChIP-Seq SW620 Human | KLF5 |
| 2106 DSG3       | Enrichr TF Perturbations followed by expression: KLF5 20726797 ChIP-Seq SW620 Human | KLF5 |
| 2107 SOWAHA     | Enrichr TF Perturbations followed by expression: KLF5 20726797 ChIP-Seq SW620 Human | KLF5 |
| 2108 SNAP25     | Enrichr TF Perturbations followed by expression: KLF5 20726797 ChIP-Seq SW620 Human | KLF5 |
| 2109 ST6GALNAC1 | Enrichr TF Perturbations followed by expression: KLF5 20726797 ChIP-Seq SW620 Human | KLF5 |
| 2110 ST6GALNAC2 | Enrichr TF Perturbations followed by expression: KLF5 20726797 ChIP-Seq SW620 Human | KLF5 |
| 2111 RTN1       | Enrichr TF Perturbations followed by expression: KLF5 20726797 ChIP-Seq SW620 Human | KLF5 |
| 2112 SMIM6      | Enrichr TF Perturbations followed by expression: KLF5 20726797 ChIP-Seq SW620 Human | KLF5 |
| 2113 CRYBG2     | Enrichr TF Perturbations followed by expression: KLF5 20726797 ChIP-Seq SW620 Human | KLF5 |
| 2114 TTC22      | Enrichr TF Perturbations followed by expression: KLF5 20726797 ChIP-Seq SW620 Human | KLF5 |
| 2115 TNFAIP8    | Enrichr TF Perturbations followed by expression: KLF5 20726797 ChIP-Seq SW620 Human | KLF5 |
| 2116 NPR3       | Enrichr TF Perturbations followed by expression: KLF5 20726797 ChIP-Seq SW620 Human | KLF5 |
| 2117 ITPR2      | Enrichr TF Perturbations followed by expression: KLF5 20726797 ChIP-Seq SW620 Human | KLF5 |
| 2118 FBXO44     | Enrichr TF Perturbations followed by expression: KLF5 20726797 ChIP-Seq SW620 Human | KLF5 |
| 2119 RASGEF1A   | Enrichr TF Perturbations followed by expression: KLF5 20726797 ChIP-Seq SW620 Human | KLF5 |
| 2120 FUT8       | Enrichr TF Perturbations followed by expression: KLF5 20726797 ChIP-Seq SW620 Human | KLF5 |
| 2121 UPK1B      | Enrichr TF Perturbations followed by expression: KLF5 20726797 ChIP-Seq SW620 Human | KLF5 |
| 2122 RDH16      | Enrichr TF Perturbations followed by expression: KLF5 20726797 ChIP-Seq SW620 Human | KLF5 |
| 2123 CPXM2      | Enrichr TF Perturbations followed by expression: KLF5 20726797 ChIP-Seq SW620 Human | KLF5 |
| 2124 SYMPK      | Enrichr TF Perturbations followed by expression: KLF5 20726797 ChIP-Seq SW620 Human | KLF5 |
| 2125 CASP1      | Enrichr TF Perturbations followed by expression: KLF5 20726797 ChIP-Seq SW620 Human | KLF5 |
| 2126 FAM83E     | Enrichr TF Perturbations followed by expression: KLF5 20726797 ChIP-Seq SW620 Human | KLF5 |
| 2127 PRPH       | Enrichr TF Perturbations followed by expression: KLF5 20726797 ChIP-Seq SW620 Human | KLF5 |
| 2128 WNT4       | Enrichr TF Perturbations followed by expression: KLF5 20726797 ChIP-Seq SW620 Human | KLF5 |
| 2129 HGFAC      | Enrichr TF Perturbations followed by expression: KLF5 20726797 ChIP-Seq SW620 Human | KLF5 |
| 2130 TBX1       | Enrichr TF Perturbations followed by expression: KLF5 20726797 ChIP-Seq SW620 Human | KLF5 |
| 2131 CAMK1D     | Enrichr TF Perturbations followed by expression: KLF5 20726797 ChIP-Seq SW620 Human | KLF5 |
| 2132 MUC5B      | Enrichr TF Perturbations followed by expression: KLF5 20726797 ChIP-Seq SW620 Human | KLF5 |
| 2133 STYK1      | Enrichr TF Perturbations followed by expression: KLF5 20726797 ChIP-Seq SW620 Human | KLF5 |

|               |                                                                                     |             |
|---------------|-------------------------------------------------------------------------------------|-------------|
| 2134 DCXR     | Enrichr TF Perturbations followed by expression: KLF5 20726797 ChIP-Seq SW620 Human | KLF5        |
| 2135 SYT16    | Enrichr TF Perturbations followed by expression: KLF5 20726797 ChIP-Seq SW620 Human | KLF5        |
| 2136 MCOLN2   | Enrichr TF Perturbations followed by expression: KLF5 20726797 ChIP-Seq SW620 Human | KLF5        |
| 2137 KLF5     | Enrichr TF Perturbations followed by expression: KLF5 20726797 ChIP-Seq SW620 Human | KLF5        |
| 2138 HTR3A    | Enrichr TF Perturbations followed by expression: KLF5 20726797 ChIP-Seq SW620 Human | KLF5        |
| 2139 HSH2D    | Enrichr TF Perturbations followed by expression: KLF5 20726797 ChIP-Seq SW620 Human | KLF5        |
| 2140 TST      | Enrichr TF Perturbations followed by expression: KLF5 20726797 ChIP-Seq SW620 Human | KLF5        |
| 2141 P2RX1    | Enrichr TF Perturbations followed by expression: KLF5 20726797 ChIP-Seq SW620 Human | KLF5        |
| 2142 LTF      | Enrichr TF Perturbations followed by expression: KLF5 20726797 ChIP-Seq SW620 Human | KLF5        |
| 2143 ASPA     | Enrichr TF Perturbations followed by expression: KLF5 20726797 ChIP-Seq SW620 Human | KLF5        |
| 2144 SLC24A3  | Enrichr TF Perturbations followed by expression: KLF5 20726797 ChIP-Seq SW620 Human | KLF5        |
| 2145 SH2D4A   | Enrichr TF Perturbations followed by expression: KLF5 20726797 ChIP-Seq SW620 Human | KLF5        |
| 2146 MSLN     | Enrichr TF Perturbations followed by expression: KLF5 20726797 ChIP-Seq SW620 Human | KLF5        |
| 2147 TRIM31   | Enrichr TF Perturbations followed by expression: KLF5 20726797 ChIP-Seq SW620 Human | KLF5        |
| 2148 PSCA     | Enrichr TF Perturbations followed by expression: KLF5 20726797 ChIP-Seq SW620 Human | KLF5        |
| 2149 SEMA3C   | Enrichr TF Perturbations followed by expression: KLF5 20726797 ChIP-Seq SW620 Human | KLF5        |
| 2150 ATP2A3   | Enrichr TF Perturbations followed by expression: KLF5 20726797 ChIP-Seq SW620 Human | KLF5        |
| 2151 HSD17B14 | Enrichr TF Perturbations followed by expression: KLF5 20726797 ChIP-Seq SW620 Human | KLF5        |
| 2152 CLCN2    | Enrichr TF Perturbations followed by expression: KLF5 20726797 ChIP-Seq SW620 Human | KLF5        |
| 2153 TPRN     | Enrichr TF Perturbations followed by expression: KLF5 20726797 ChIP-Seq SW620 Human | KLF5        |
| 2154 PTPRZ1   | Enrichr TF Perturbations followed by expression: KLF5 20726797 ChIP-Seq SW620 Human | KLF5        |
| 2155 NT5DC3   | Enrichr TF Perturbations followed by expression: KLF5 20726797 ChIP-Seq SW620 Human | KLF5        |
| 2156 VSIG1    | Enrichr TF Perturbations followed by expression: KLF5 20726797 ChIP-Seq SW620 Human | KLF5        |
| 2157 NOS1     | Enrichr TF Perturbations followed by expression: KLF5 20726797 ChIP-Seq SW620 Human | KLF5        |
| 2158 DLGAP1   | SOX2-KLF5 coregulated genes from PMID: 33972779                                     | SOX2 + KLF5 |
| 2159 SLC35E4  | SOX2-KLF5 coregulated genes from PMID: 33972779                                     | SOX2 + KLF5 |
| 2160 USP12    | SOX2-KLF5 coregulated genes from PMID: 33972779                                     | SOX2 + KLF5 |
| 2161 CARD10   | SOX2-KLF5 coregulated genes from PMID: 33972779                                     | SOX2 + KLF5 |
| 2162 KLF5     | SOX2-KLF5 coregulated genes from PMID: 33972779                                     | SOX2 + KLF5 |
| 2163 CUBN     | SOX2-KLF5 coregulated genes from PMID: 33972779                                     | SOX2 + KLF5 |
| 2164 HS3ST1   | SOX2-KLF5 coregulated genes from PMID: 33972779                                     | SOX2 + KLF5 |
| 2165 TMEM47   | SOX2-KLF5 coregulated genes from PMID: 33972779                                     | SOX2 + KLF5 |
| 2166 RUNX1    | SOX2-KLF5 coregulated genes from PMID: 33972779                                     | SOX2 + KLF5 |
| 2167 JAG1     | SOX2-KLF5 coregulated genes from PMID: 33972779                                     | SOX2 + KLF5 |
| 2168 PLCB1    | SOX2-KLF5 coregulated genes from PMID: 33972779                                     | SOX2 + KLF5 |
| 2169 PCDH17   | SOX2-KLF5 coregulated genes from PMID: 33972779                                     | SOX2 + KLF5 |
| 2170 KCTD1    | SOX2-KLF5 coregulated genes from PMID: 33972779                                     | SOX2 + KLF5 |
| 2171 DSG3     | SOX2-KLF5 coregulated genes from PMID: 33972779                                     | SOX2 + KLF5 |
| 2172 BMP2     | SOX2-KLF5 coregulated genes from PMID: 33972779                                     | SOX2 + KLF5 |
| 2173 PTGER2   | SOX2-KLF5 coregulated genes from PMID: 33972779                                     | SOX2 + KLF5 |
| 2174 SLC5A3   | SOX2-KLF5 coregulated genes from PMID: 33972779                                     | SOX2 + KLF5 |
| 2175 AKAP6    | SOX2-KLF5 coregulated genes from PMID: 33972779                                     | SOX2 + KLF5 |
| 2176 SH3GL2   | SOX2-KLF5 coregulated genes from PMID: 33972779                                     | SOX2 + KLF5 |
| 2177 TTC39C   | SOX2-KLF5 coregulated genes from PMID: 33972779                                     | SOX2 + KLF5 |
| 2178 NRIP1    | SOX2-KLF5 coregulated genes from PMID: 33972779                                     | SOX2 + KLF5 |
| 2179 OCIAD2   | SOX2-KLF5 coregulated genes from PMID: 33972779                                     | SOX2 + KLF5 |
| 2180 KIAA1328 | SOX2-KLF5 coregulated genes from PMID: 33972779                                     | SOX2 + KLF5 |
| 2181 ETS2     | SOX2-KLF5 coregulated genes from PMID: 33972779                                     | SOX2 + KLF5 |
| 2182 SLC1A1   | SOX2-KLF5 coregulated genes from PMID: 33972779                                     | SOX2 + KLF5 |
| 2183 LMO7     | SOX2-KLF5 coregulated genes from PMID: 33972779                                     | SOX2 + KLF5 |
| 2184 BTG3     | SOX2-KLF5 coregulated genes from PMID: 33972779                                     | SOX2 + KLF5 |
| 2185 DACH1    | SOX2-KLF5 coregulated genes from PMID: 33972779                                     | SOX2 + KLF5 |
| 2186 MIPEP    | SOX2-KLF5 coregulated genes from PMID: 33972779                                     | SOX2 + KLF5 |
| 2187 FERMT2   | SOX2-KLF5 coregulated genes from PMID: 33972779                                     | SOX2 + KLF5 |
| 2188 SLIT2    | SOX2-KLF5 coregulated genes from PMID: 33972779                                     | SOX2 + KLF5 |
| 2189 MAPRE2   | SOX2-KLF5 coregulated genes from PMID: 33972779                                     | SOX2 + KLF5 |
| 2190 FUNDC1   | SOX2-KLF5 coregulated genes from PMID: 33972779                                     | SOX2 + KLF5 |
| 2191 NFATC2   | SOX2-KLF5 coregulated genes from PMID: 33972779                                     | SOX2 + KLF5 |
| 2192 TXNDC16  | SOX2-KLF5 coregulated genes from PMID: 33972779                                     | SOX2 + KLF5 |
| 2193 ALG13    | SOX2-KLF5 coregulated genes from PMID: 33972779                                     | SOX2 + KLF5 |
| 2194 RAB27B   | SOX2-KLF5 coregulated genes from PMID: 33972779                                     | SOX2 + KLF5 |

|                |                                                 |             |
|----------------|-------------------------------------------------|-------------|
| 2195 SPATA13   | SOX2-KLF5 coregulated genes from PMID: 33972779 | SOX2 + KLF5 |
| 2196 NOVA1     | SOX2-KLF5 coregulated genes from PMID: 33972779 | SOX2 + KLF5 |
| 2197 BACE2     | SOX2-KLF5 coregulated genes from PMID: 33972779 | SOX2 + KLF5 |
| 2198 CYR1      | SOX2-KLF5 coregulated genes from PMID: 33972779 | SOX2 + KLF5 |
| 2199 FUT8      | SOX2-KLF5 coregulated genes from PMID: 33972779 | SOX2 + KLF5 |
| 2200 TRMT2B    | SOX2-KLF5 coregulated genes from PMID: 33972779 | SOX2 + KLF5 |
| 2201 SIK1B     | SOX2-KLF5 coregulated genes from PMID: 33972779 | SOX2 + KLF5 |
| 2202 SIK1      | SOX2-KLF5 coregulated genes from PMID: 33972779 | SOX2 + KLF5 |
| 2203 CNTLN     | SOX2-KLF5 coregulated genes from PMID: 33972779 | SOX2 + KLF5 |
| 2204 LINGO2    | SOX2-KLF5 coregulated genes from PMID: 33972779 | SOX2 + KLF5 |
| 2205 APBB2     | SOX2-KLF5 coregulated genes from PMID: 33972779 | SOX2 + KLF5 |
| 2206 SERPINB2  | SOX2-KLF5 coregulated genes from PMID: 33972779 | SOX2 + KLF5 |
| 2207 SHROOM2   | SOX2-KLF5 coregulated genes from PMID: 33972779 | SOX2 + KLF5 |
| 2208 GNA14     | SOX2-KLF5 coregulated genes from PMID: 33972779 | SOX2 + KLF5 |
| 2209 TULP3     | SOX2-KLF5 coregulated genes from PMID: 33972779 | SOX2 + KLF5 |
| 2210 VOPP1     | SOX2-KLF5 coregulated genes from PMID: 33972779 | SOX2 + KLF5 |
| 2211 DOCK11    | SOX2-KLF5 coregulated genes from PMID: 33972779 | SOX2 + KLF5 |
| 2212 SETBP1    | SOX2-KLF5 coregulated genes from PMID: 33972779 | SOX2 + KLF5 |
| 2213 GCNT3     | SOX2-KLF5 coregulated genes from PMID: 33972779 | SOX2 + KLF5 |
| 2214 OSBPL3    | SOX2-KLF5 coregulated genes from PMID: 33972779 | SOX2 + KLF5 |
| 2215 ANXA11    | SOX2-KLF5 coregulated genes from PMID: 33972779 | SOX2 + KLF5 |
| 2216 GREB1L    | SOX2-KLF5 coregulated genes from PMID: 33972779 | SOX2 + KLF5 |
| 2217 KLF3      | SOX2-KLF5 coregulated genes from PMID: 33972779 | SOX2 + KLF5 |
| 2218 RSU1      | SOX2-KLF5 coregulated genes from PMID: 33972779 | SOX2 + KLF5 |
| 2219 ATRNL1    | SOX2-KLF5 coregulated genes from PMID: 33972779 | SOX2 + KLF5 |
| 2220 B4GALNT3  | SOX2-KLF5 coregulated genes from PMID: 33972779 | SOX2 + KLF5 |
| 2221 MLLT3     | SOX2-KLF5 coregulated genes from PMID: 33972779 | SOX2 + KLF5 |
| 2222 UGT8      | SOX2-KLF5 coregulated genes from PMID: 33972779 | SOX2 + KLF5 |
| 2223 SHROOM3   | SOX2-KLF5 coregulated genes from PMID: 33972779 | SOX2 + KLF5 |
| 2224 TMTC1     | SOX2-KLF5 coregulated genes from PMID: 33972779 | SOX2 + KLF5 |
| 2225 DCLK2     | SOX2-KLF5 coregulated genes from PMID: 33972779 | SOX2 + KLF5 |
| 2226 DUSP14    | SOX2-KLF5 coregulated genes from PMID: 33972779 | SOX2 + KLF5 |
| 2227 SAMD4A    | SOX2-KLF5 coregulated genes from PMID: 33972779 | SOX2 + KLF5 |
| 2228 NDUFA4    | SOX2-KLF5 coregulated genes from PMID: 33972779 | SOX2 + KLF5 |
| 2229 TGFBR1    | SOX2-KLF5 coregulated genes from PMID: 33972779 | SOX2 + KLF5 |
| 2230 APLN      | SOX2-KLF5 coregulated genes from PMID: 33972779 | SOX2 + KLF5 |
| 2231 CALCB     | SOX2-KLF5 coregulated genes from PMID: 33972779 | SOX2 + KLF5 |
| 2232 LMTK2     | SOX2-KLF5 coregulated genes from PMID: 33972779 | SOX2 + KLF5 |
| 2233 FMN1      | SOX2-KLF5 coregulated genes from PMID: 33972779 | SOX2 + KLF5 |
| 2234 TNS4      | SOX2-KLF5 coregulated genes from PMID: 33972779 | SOX2 + KLF5 |
| 2235 TNFAIP2   | SOX2-KLF5 coregulated genes from PMID: 33972779 | SOX2 + KLF5 |
| 2236 MOXD1     | SOX2-KLF5 coregulated genes from PMID: 33972779 | SOX2 + KLF5 |
| 2237 MACROD2   | SOX2-KLF5 coregulated genes from PMID: 33972779 | SOX2 + KLF5 |
| 2238 LNX1      | SOX2-KLF5 coregulated genes from PMID: 33972779 | SOX2 + KLF5 |
| 2239 ETV1      | SOX2-KLF5 coregulated genes from PMID: 33972779 | SOX2 + KLF5 |
| 2240 CCNG2     | SOX2-KLF5 coregulated genes from PMID: 33972779 | SOX2 + KLF5 |
| 2241 ST8SIA6   | SOX2-KLF5 coregulated genes from PMID: 33972779 | SOX2 + KLF5 |
| 2242 RNF150    | SOX2-KLF5 coregulated genes from PMID: 33972779 | SOX2 + KLF5 |
| 2243 STARD13   | SOX2-KLF5 coregulated genes from PMID: 33972779 | SOX2 + KLF5 |
| 2244 IPMK      | SOX2-KLF5 coregulated genes from PMID: 33972779 | SOX2 + KLF5 |
| 2245 NCOA7     | SOX2-KLF5 coregulated genes from PMID: 33972779 | SOX2 + KLF5 |
| 2246 ATP8B4    | SOX2-KLF5 coregulated genes from PMID: 33972779 | SOX2 + KLF5 |
| 2247 PLIN2     | SOX2-KLF5 coregulated genes from PMID: 33972779 | SOX2 + KLF5 |
| 2248 AHNAK     | SOX2-KLF5 coregulated genes from PMID: 33972779 | SOX2 + KLF5 |
| 2249 RAB11FIP2 | SOX2-KLF5 coregulated genes from PMID: 33972779 | SOX2 + KLF5 |
| 2250 STK38     | SOX2-KLF5 coregulated genes from PMID: 33972779 | SOX2 + KLF5 |
| 2251 ARMC2     | SOX2-KLF5 coregulated genes from PMID: 33972779 | SOX2 + KLF5 |
| 2252 AVPI1     | SOX2-KLF5 coregulated genes from PMID: 33972779 | SOX2 + KLF5 |
| 2253 TNIP3     | SOX2-KLF5 coregulated genes from PMID: 33972779 | SOX2 + KLF5 |
| 2254 MYO10     | SOX2-KLF5 coregulated genes from PMID: 33972779 | SOX2 + KLF5 |
| 2255 EPDR1     | SOX2-KLF5 coregulated genes from PMID: 33972779 | SOX2 + KLF5 |

|                |                                                 |             |
|----------------|-------------------------------------------------|-------------|
| 2256 RASSF6    | SOX2-KLF5 coregulated genes from PMID: 33972779 | SOX2 + KLF5 |
| 2257 BMP6      | SOX2-KLF5 coregulated genes from PMID: 33972779 | SOX2 + KLF5 |
| 2258 RUNX2     | SOX2-KLF5 coregulated genes from PMID: 33972779 | SOX2 + KLF5 |
| 2259 PAPPA     | SOX2-KLF5 coregulated genes from PMID: 33972779 | SOX2 + KLF5 |
| 2260 FOXF2     | SOX2-KLF5 coregulated genes from PMID: 33972779 | SOX2 + KLF5 |
| 2261 APCDD1    | SOX2-KLF5 coregulated genes from PMID: 33972779 | SOX2 + KLF5 |
| 2262 IL15      | SOX2-KLF5 coregulated genes from PMID: 33972779 | SOX2 + KLF5 |
| 2263 FAM171A1  | SOX2-KLF5 coregulated genes from PMID: 33972779 | SOX2 + KLF5 |
| 2264 GRID2     | SOX2-KLF5 coregulated genes from PMID: 33972779 | SOX2 + KLF5 |
| 2265 PCDH7     | SOX2-KLF5 coregulated genes from PMID: 33972779 | SOX2 + KLF5 |
| 2266 FARP1     | SOX2-KLF5 coregulated genes from PMID: 33972779 | SOX2 + KLF5 |
| 2267 TMPRSS11D | SOX2-KLF5 coregulated genes from PMID: 33972779 | SOX2 + KLF5 |
| 2268 XPNPEP2   | SOX2-KLF5 coregulated genes from PMID: 33972779 | SOX2 + KLF5 |
| 2269 CTBP2     | SOX2-KLF5 coregulated genes from PMID: 33972779 | SOX2 + KLF5 |
| 2270 SUSD1     | SOX2-KLF5 coregulated genes from PMID: 33972779 | SOX2 + KLF5 |
| 2271 ITGB8     | SOX2-KLF5 coregulated genes from PMID: 33972779 | SOX2 + KLF5 |
| 2272 MICAL3    | SOX2-KLF5 coregulated genes from PMID: 33972779 | SOX2 + KLF5 |
| 2273 BCAT1     | SOX2-KLF5 coregulated genes from PMID: 33972779 | SOX2 + KLF5 |
| 2274 MYOF      | SOX2-KLF5 coregulated genes from PMID: 33972779 | SOX2 + KLF5 |
| 2275 SDCBP2    | SOX2-KLF5 coregulated genes from PMID: 33972779 | SOX2 + KLF5 |
| 2276 MARCKS    | SOX2-KLF5 coregulated genes from PMID: 33972779 | SOX2 + KLF5 |
| 2277 PC        | SOX2-KLF5 coregulated genes from PMID: 33972779 | SOX2 + KLF5 |
| 2278 PKIB      | SOX2-KLF5 coregulated genes from PMID: 33972779 | SOX2 + KLF5 |
| 2279 ATP8B1    | SOX2-KLF5 coregulated genes from PMID: 33972779 | SOX2 + KLF5 |
| 2280 APBB1IP   | SOX2-KLF5 coregulated genes from PMID: 33972779 | SOX2 + KLF5 |
| 2281 LAMA3     | SOX2-KLF5 coregulated genes from PMID: 33972779 | SOX2 + KLF5 |
| 2282 TSPAN14   | SOX2-KLF5 coregulated genes from PMID: 33972779 | SOX2 + KLF5 |
| 2283 BACH2     | SOX2-KLF5 coregulated genes from PMID: 33972779 | SOX2 + KLF5 |
| 2284 MKX       | SOX2-KLF5 coregulated genes from PMID: 33972779 | SOX2 + KLF5 |
| 2285 RRP12     | SOX2-KLF5 coregulated genes from PMID: 33972779 | SOX2 + KLF5 |
| 2286 SULT1B1   | SOX2-KLF5 coregulated genes from PMID: 33972779 | SOX2 + KLF5 |
| 2287 PIM1      | SOX2-KLF5 coregulated genes from PMID: 33972779 | SOX2 + KLF5 |
| 2288 AQP11     | SOX2-KLF5 coregulated genes from PMID: 33972779 | SOX2 + KLF5 |
| 2289 ZNF395    | SOX2-KLF5 coregulated genes from PMID: 33972779 | SOX2 + KLF5 |
| 2290 DIRAS2    | SOX2-KLF5 coregulated genes from PMID: 33972779 | SOX2 + KLF5 |
| 2291 RNF24     | SOX2-KLF5 coregulated genes from PMID: 33972779 | SOX2 + KLF5 |
| 2292 EDN1      | SOX2-KLF5 coregulated genes from PMID: 33972779 | SOX2 + KLF5 |
| 2293 SH3RF1    | SOX2-KLF5 coregulated genes from PMID: 33972779 | SOX2 + KLF5 |
| 2294 FNBP1     | SOX2-KLF5 coregulated genes from PMID: 33972779 | SOX2 + KLF5 |
| 2295 OPHN1     | SOX2-KLF5 coregulated genes from PMID: 33972779 | SOX2 + KLF5 |
| 2296 AGR3      | SOX2-KLF5 coregulated genes from PMID: 33972779 | SOX2 + KLF5 |
| 2297 HTRA1     | SOX2-KLF5 coregulated genes from PMID: 33972779 | SOX2 + KLF5 |
| 2298 GFRA2     | SOX2-KLF5 coregulated genes from PMID: 33972779 | SOX2 + KLF5 |
| 2299 TNC       | SOX2-KLF5 coregulated genes from PMID: 33972779 | SOX2 + KLF5 |
| 2300 CTSZ      | SOX2-KLF5 coregulated genes from PMID: 33972779 | SOX2 + KLF5 |
| 2301 TSPAN5    | SOX2-KLF5 coregulated genes from PMID: 33972779 | SOX2 + KLF5 |
| 2302 SERPINB5  | SOX2-KLF5 coregulated genes from PMID: 33972779 | SOX2 + KLF5 |
| 2303 LPCAT1    | SOX2-KLF5 coregulated genes from PMID: 33972779 | SOX2 + KLF5 |
| 2304 DCLK1     | SOX2-KLF5 coregulated genes from PMID: 33972779 | SOX2 + KLF5 |
| 2305 PPP3CA    | SOX2-KLF5 coregulated genes from PMID: 33972779 | SOX2 + KLF5 |
| 2306 SLC7A11   | SOX2-KLF5 coregulated genes from PMID: 33972779 | SOX2 + KLF5 |
| 2307 TLE1      | SOX2-KLF5 coregulated genes from PMID: 33972779 | SOX2 + KLF5 |
| 2308 ANK3      | SOX2-KLF5 coregulated genes from PMID: 33972779 | SOX2 + KLF5 |
| 2309 PIP5K1B   | SOX2-KLF5 coregulated genes from PMID: 33972779 | SOX2 + KLF5 |
| 2310 GRIK1     | SOX2-KLF5 coregulated genes from PMID: 33972779 | SOX2 + KLF5 |
| 2311 TADA2A    | SOX2-KLF5 coregulated genes from PMID: 33972779 | SOX2 + KLF5 |
| 2312 PARM1     | SOX2-KLF5 coregulated genes from PMID: 33972779 | SOX2 + KLF5 |
| 2313 PRRG4     | SOX2-KLF5 coregulated genes from PMID: 33972779 | SOX2 + KLF5 |
| 2314 SOD3      | SOX2-KLF5 coregulated genes from PMID: 33972779 | SOX2 + KLF5 |
| 2315 FAM83B    | SOX2-KLF5 coregulated genes from PMID: 33972779 | SOX2 + KLF5 |
| 2316 FAM53B    | SOX2-KLF5 coregulated genes from PMID: 33972779 | SOX2 + KLF5 |



|                |                                                 |             |
|----------------|-------------------------------------------------|-------------|
| 2317 RAB11FIP1 | SOX2-KLF5 coregulated genes from PMID: 33972779 | SOX2 + KLF5 |
| 2318 CYTH3     | SOX2-KLF5 coregulated genes from PMID: 33972779 | SOX2 + KLF5 |
| 2319 ENKUR     | SOX2-KLF5 coregulated genes from PMID: 33972779 | SOX2 + KLF5 |
| 2320 NRP1      | SOX2-KLF5 coregulated genes from PMID: 33972779 | SOX2 + KLF5 |
| 2321 OSBPL2    | SOX2-KLF5 coregulated genes from PMID: 33972779 | SOX2 + KLF5 |
| 2322 SEMA5A    | SOX2-KLF5 coregulated genes from PMID: 33972779 | SOX2 + KLF5 |
| 2323 RCBTB2    | SOX2-KLF5 coregulated genes from PMID: 33972779 | SOX2 + KLF5 |
| 2324 FOXQ1     | SOX2-KLF5 coregulated genes from PMID: 33972779 | SOX2 + KLF5 |
| 2325 RAP1GAP2  | SOX2-KLF5 coregulated genes from PMID: 33972779 | SOX2 + KLF5 |
| 2326 ARL4A     | SOX2-KLF5 coregulated genes from PMID: 33972779 | SOX2 + KLF5 |
| 2327 KLF4      | SOX2-KLF5 coregulated genes from PMID: 33972779 | SOX2 + KLF5 |
| 2328 CHST3     | SOX2-KLF5 coregulated genes from PMID: 33972779 | SOX2 + KLF5 |
| 2329 SLC16A7   | SOX2-KLF5 coregulated genes from PMID: 33972779 | SOX2 + KLF5 |
| 2330 GPR158    | SOX2-KLF5 coregulated genes from PMID: 33972779 | SOX2 + KLF5 |
| 2331 ARHGAP10  | SOX2-KLF5 coregulated genes from PMID: 33972779 | SOX2 + KLF5 |
| 2332 ABCC4     | SOX2-KLF5 coregulated genes from PMID: 33972779 | SOX2 + KLF5 |
| 2333 ZFAND5    | SOX2-KLF5 coregulated genes from PMID: 33972779 | SOX2 + KLF5 |
| 2334 RIN2      | SOX2-KLF5 coregulated genes from PMID: 33972779 | SOX2 + KLF5 |
| 2335 DSC3      | SOX2-KLF5 coregulated genes from PMID: 33972779 | SOX2 + KLF5 |
| 2336 SOX21     | SOX2-KLF5 coregulated genes from PMID: 33972779 | SOX2 + KLF5 |
| 2337 FRAT2     | SOX2-KLF5 coregulated genes from PMID: 33972779 | SOX2 + KLF5 |
| 2338 ANXA1     | SOX2-KLF5 coregulated genes from PMID: 33972779 | SOX2 + KLF5 |
| 2339 FCHSD2    | SOX2-KLF5 coregulated genes from PMID: 33972779 | SOX2 + KLF5 |
| 2340 TMPRSS11E | SOX2-KLF5 coregulated genes from PMID: 33972779 | SOX2 + KLF5 |
| 2341 SLITRK6   | SOX2-KLF5 coregulated genes from PMID: 33972779 | SOX2 + KLF5 |
| 2342 PALLD     | SOX2-KLF5 coregulated genes from PMID: 33972779 | SOX2 + KLF5 |
| 2343 ZNF451    | SOX2-KLF5 coregulated genes from PMID: 33972779 | SOX2 + KLF5 |
| 2344 PDE1C     | SOX2-KLF5 coregulated genes from PMID: 33972779 | SOX2 + KLF5 |
| 2345 EFN2      | SOX2-KLF5 coregulated genes from PMID: 33972779 | SOX2 + KLF5 |
| 2346 COL15A1   | SOX2-KLF5 coregulated genes from PMID: 33972779 | SOX2 + KLF5 |
| 2347 KLHL32    | SOX2-KLF5 coregulated genes from PMID: 33972779 | SOX2 + KLF5 |
| 2348 ASAH1     | SOX2-KLF5 coregulated genes from PMID: 33972779 | SOX2 + KLF5 |
| 2349 CHIC1     | SOX2-KLF5 coregulated genes from PMID: 33972779 | SOX2 + KLF5 |
| 2350 JUP       | SOX2-KLF5 coregulated genes from PMID: 33972779 | SOX2 + KLF5 |
| 2351 NDFIP2    | SOX2-KLF5 coregulated genes from PMID: 33972779 | SOX2 + KLF5 |
| 2352 POLM      | SOX2-KLF5 coregulated genes from PMID: 33972779 | SOX2 + KLF5 |
| 2353 TMEM211   | SOX2-KLF5 coregulated genes from PMID: 33972779 | SOX2 + KLF5 |
| 2354 SLC1A4    | SOX2-KLF5 coregulated genes from PMID: 33972779 | SOX2 + KLF5 |
| 2355 TSPAN8    | SOX2-KLF5 coregulated genes from PMID: 33972779 | SOX2 + KLF5 |
| 2356 TRIP10    | SOX2-KLF5 coregulated genes from PMID: 33972779 | SOX2 + KLF5 |
| 2357 PCDH18    | SOX2-KLF5 coregulated genes from PMID: 33972779 | SOX2 + KLF5 |
| 2358 PPP1CB    | SOX2-KLF5 coregulated genes from PMID: 33972779 | SOX2 + KLF5 |
| 2359 CA10      | SOX2-KLF5 coregulated genes from PMID: 33972779 | SOX2 + KLF5 |
| 2360 SYNE2     | SOX2-KLF5 coregulated genes from PMID: 33972779 | SOX2 + KLF5 |
| 2361 CECR2     | SOX2-KLF5 coregulated genes from PMID: 33972779 | SOX2 + KLF5 |
| 2362 DOCK9     | SOX2-KLF5 coregulated genes from PMID: 33972779 | SOX2 + KLF5 |
| 2363 SULF1     | SOX2-KLF5 coregulated genes from PMID: 33972779 | SOX2 + KLF5 |
| 2364 WDR72     | SOX2-KLF5 coregulated genes from PMID: 33972779 | SOX2 + KLF5 |
| 2365 RAP2A     | SOX2-KLF5 coregulated genes from PMID: 33972779 | SOX2 + KLF5 |
| 2366 KIRREL3   | SOX2-KLF5 coregulated genes from PMID: 33972779 | SOX2 + KLF5 |
| 2367 EXOC4     | SOX2-KLF5 coregulated genes from PMID: 33972779 | SOX2 + KLF5 |
| 2368 LY75      | SOX2-KLF5 coregulated genes from PMID: 33972779 | SOX2 + KLF5 |
| 2369 LAMA4     | SOX2-KLF5 coregulated genes from PMID: 33972779 | SOX2 + KLF5 |
| 2370 IGSF11    | SOX2-KLF5 coregulated genes from PMID: 33972779 | SOX2 + KLF5 |
| 2371 FRAS1     | SOX2-KLF5 coregulated genes from PMID: 33972779 | SOX2 + KLF5 |
| 2372 DENND1A   | SOX2-KLF5 coregulated genes from PMID: 33972779 | SOX2 + KLF5 |
| 2373 MAPK10    | SOX2-KLF5 coregulated genes from PMID: 33972779 | SOX2 + KLF5 |
| 2374 TGM3      | SOX2-KLF5 coregulated genes from PMID: 33972779 | SOX2 + KLF5 |
| 2375 TMPRSS4   | SOX2-KLF5 coregulated genes from PMID: 33972779 | SOX2 + KLF5 |
| 2376 SNRPN     | SOX2-KLF5 coregulated genes from PMID: 33972779 | SOX2 + KLF5 |
| 2377 DPYSL3    | SOX2-KLF5 coregulated genes from PMID: 33972779 | SOX2 + KLF5 |

|               |                                                 |             |
|---------------|-------------------------------------------------|-------------|
| 2378 C6orf136 | SOX2-KLF5 coregulated genes from PMID: 33972779 | SOX2 + KLF5 |
| 2379 BNC2     | SOX2-KLF5 coregulated genes from PMID: 33972779 | SOX2 + KLF5 |
| 2380 TANK     | SOX2-KLF5 coregulated genes from PMID: 33972779 | SOX2 + KLF5 |
| 2381 TANC1    | SOX2-KLF5 coregulated genes from PMID: 33972779 | SOX2 + KLF5 |
| 2382 NOL10    | SOX2-KLF5 coregulated genes from PMID: 33972779 | SOX2 + KLF5 |
| 2383 AKAP12   | SOX2-KLF5 coregulated genes from PMID: 33972779 | SOX2 + KLF5 |
| 2384 SEMA6D   | SOX2-KLF5 coregulated genes from PMID: 33972779 | SOX2 + KLF5 |
| 2385 RIMS2    | SOX2-KLF5 coregulated genes from PMID: 33972779 | SOX2 + KLF5 |
| 2386 GDNF     | SOX2-KLF5 coregulated genes from PMID: 33972779 | SOX2 + KLF5 |
| 2387 FIGN     | SOX2-KLF5 coregulated genes from PMID: 33972779 | SOX2 + KLF5 |
| 2388 WFDC1    | SOX2-KLF5 coregulated genes from PMID: 33972779 | SOX2 + KLF5 |
| 2389 SIL1     | SOX2-KLF5 coregulated genes from PMID: 33972779 | SOX2 + KLF5 |
| 2390 BARX2    | SOX2-KLF5 coregulated genes from PMID: 33972779 | SOX2 + KLF5 |
| 2391 WNT7A    | SOX2-KLF5 coregulated genes from PMID: 33972779 | SOX2 + KLF5 |
| 2392 MACC1    | SOX2-KLF5 coregulated genes from PMID: 33972779 | SOX2 + KLF5 |
| 2393 CITED2   | SOX2-KLF5 coregulated genes from PMID: 33972779 | SOX2 + KLF5 |
| 2394 FBXO16   | SOX2-KLF5 coregulated genes from PMID: 33972779 | SOX2 + KLF5 |
| 2395 TGFBI    | SOX2-KLF5 coregulated genes from PMID: 33972779 | SOX2 + KLF5 |
| 2396 ASB1     | SOX2-KLF5 coregulated genes from PMID: 33972779 | SOX2 + KLF5 |
| 2397 ATP8A1   | SOX2-KLF5 coregulated genes from PMID: 33972779 | SOX2 + KLF5 |
| 2398 CCDC85A  | SOX2-KLF5 coregulated genes from PMID: 33972779 | SOX2 + KLF5 |
| 2399 OSGIN1   | SOX2-KLF5 coregulated genes from PMID: 33972779 | SOX2 + KLF5 |
| 2400 WNK2     | SOX2-KLF5 coregulated genes from PMID: 33972779 | SOX2 + KLF5 |
| 2401 THUMPD2  | SOX2-KLF5 coregulated genes from PMID: 33972779 | SOX2 + KLF5 |
| 2402 SLC8A1   | SOX2-KLF5 coregulated genes from PMID: 33972779 | SOX2 + KLF5 |
| 2403 N4BP1    | SOX2-KLF5 coregulated genes from PMID: 33972779 | SOX2 + KLF5 |
| 2404 PRKCH    | SOX2-KLF5 coregulated genes from PMID: 33972779 | SOX2 + KLF5 |
| 2405 PLS3     | SOX2-KLF5 coregulated genes from PMID: 33972779 | SOX2 + KLF5 |
| 2406 PPIF     | SOX2-KLF5 coregulated genes from PMID: 33972779 | SOX2 + KLF5 |
| 2407 AIG1     | SOX2-KLF5 coregulated genes from PMID: 33972779 | SOX2 + KLF5 |
| 2408 VCL      | SOX2-KLF5 coregulated genes from PMID: 33972779 | SOX2 + KLF5 |
| 2409 NRXN3    | SOX2-KLF5 coregulated genes from PMID: 33972779 | SOX2 + KLF5 |
| 2410 GSS      | SOX2-KLF5 coregulated genes from PMID: 33972779 | SOX2 + KLF5 |
| 2411 ARHGAP26 | SOX2-KLF5 coregulated genes from PMID: 33972779 | SOX2 + KLF5 |
| 2412 RPS6KA3  | SOX2-KLF5 coregulated genes from PMID: 33972779 | SOX2 + KLF5 |
| 2413 SLC16A9  | SOX2-KLF5 coregulated genes from PMID: 33972779 | SOX2 + KLF5 |
| 2414 RGS9     | SOX2-KLF5 coregulated genes from PMID: 33972779 | SOX2 + KLF5 |
| 2415 RERE     | SOX2-KLF5 coregulated genes from PMID: 33972779 | SOX2 + KLF5 |
| 2416 FBLN2    | SOX2-KLF5 coregulated genes from PMID: 33972779 | SOX2 + KLF5 |
| 2417 MEIS1    | SOX2-KLF5 coregulated genes from PMID: 33972779 | SOX2 + KLF5 |
| 2418 LYGE     | SOX2-KLF5 coregulated genes from PMID: 33972779 | SOX2 + KLF5 |
| 2419 COL8A1   | SOX2-KLF5 coregulated genes from PMID: 33972779 | SOX2 + KLF5 |
| 2420 KCMF1    | SOX2-KLF5 coregulated genes from PMID: 33972779 | SOX2 + KLF5 |
| 2421 PARP12   | SOX2-KLF5 coregulated genes from PMID: 33972779 | SOX2 + KLF5 |
| 2422 SLCO5A1  | SOX2-KLF5 coregulated genes from PMID: 33972779 | SOX2 + KLF5 |
| 2423 SMPD3    | SOX2-KLF5 coregulated genes from PMID: 33972779 | SOX2 + KLF5 |
| 2424 SLC4A4   | SOX2-KLF5 coregulated genes from PMID: 33972779 | SOX2 + KLF5 |
| 2425 FHL2     | SOX2-KLF5 coregulated genes from PMID: 33972779 | SOX2 + KLF5 |
| 2426 SLC44A3  | SOX2-KLF5 coregulated genes from PMID: 33972779 | SOX2 + KLF5 |
| 2427 SYN2     | SOX2-KLF5 coregulated genes from PMID: 33972779 | SOX2 + KLF5 |
| 2428 GLI3     | SOX2-KLF5 coregulated genes from PMID: 33972779 | SOX2 + KLF5 |
| 2429 TRIM24   | SOX2-KLF5 coregulated genes from PMID: 33972779 | SOX2 + KLF5 |
| 2430 ENPP2    | SOX2-KLF5 coregulated genes from PMID: 33972779 | SOX2 + KLF5 |
| 2431 RFX3     | SOX2-KLF5 coregulated genes from PMID: 33972779 | SOX2 + KLF5 |
| 2432 SCARA5   | SOX2-KLF5 coregulated genes from PMID: 33972779 | SOX2 + KLF5 |
| 2433 EMB      | SOX2-KLF5 coregulated genes from PMID: 33972779 | SOX2 + KLF5 |
| 2434 MMP2     | SOX2-KLF5 coregulated genes from PMID: 33972779 | SOX2 + KLF5 |
| 2435 PGM2L1   | SOX2-KLF5 coregulated genes from PMID: 33972779 | SOX2 + KLF5 |
| 2436 MGAT4A   | SOX2-KLF5 coregulated genes from PMID: 33972779 | SOX2 + KLF5 |
| 2437 FSD1L    | SOX2-KLF5 coregulated genes from PMID: 33972779 | SOX2 + KLF5 |
| 2438 PLEKHH1  | SOX2-KLF5 coregulated genes from PMID: 33972779 | SOX2 + KLF5 |

|      |          |                                                 |             |
|------|----------|-------------------------------------------------|-------------|
| 2439 | FLRT2    | SOX2-KLF5 coregulated genes from PMID: 33972779 | SOX2 + KLF5 |
| 2440 | AMOT     | SOX2-KLF5 coregulated genes from PMID: 33972779 | SOX2 + KLF5 |
| 2441 | FAM81A   | SOX2-KLF5 coregulated genes from PMID: 33972779 | SOX2 + KLF5 |
| 2442 | DNMBP    | SOX2-KLF5 coregulated genes from PMID: 33972779 | SOX2 + KLF5 |
| 2443 | EPHB6    | SOX2-KLF5 coregulated genes from PMID: 33972779 | SOX2 + KLF5 |
| 2444 | STXBP1   | SOX2-KLF5 coregulated genes from PMID: 33972779 | SOX2 + KLF5 |
| 2445 | NEBL     | SOX2-KLF5 coregulated genes from PMID: 33972779 | SOX2 + KLF5 |
| 2446 | IGF2R    | SOX2-KLF5 coregulated genes from PMID: 33972779 | SOX2 + KLF5 |
| 2447 | ZFHX3    | SOX2-KLF5 coregulated genes from PMID: 33972779 | SOX2 + KLF5 |
| 2448 | TLE4     | SOX2-KLF5 coregulated genes from PMID: 33972779 | SOX2 + KLF5 |
| 2449 | GJB5     | SOX2-KLF5 coregulated genes from PMID: 33972779 | SOX2 + KLF5 |
| 2450 | KLF12    | SOX2-KLF5 coregulated genes from PMID: 33972779 | SOX2 + KLF5 |
| 2451 | RAI14    | SOX2-KLF5 coregulated genes from PMID: 33972779 | SOX2 + KLF5 |
| 2452 | PBRM1    | SOX2-KLF5 coregulated genes from PMID: 33972779 | SOX2 + KLF5 |
| 2453 | ILVBL    | SOX2-KLF5 coregulated genes from PMID: 33972779 | SOX2 + KLF5 |
| 2454 | PCTP     | SOX2-KLF5 coregulated genes from PMID: 33972779 | SOX2 + KLF5 |
| 2455 | SOX5     | SOX2-KLF5 coregulated genes from PMID: 33972779 | SOX2 + KLF5 |
| 2456 | NCOR2    | SOX2-KLF5 coregulated genes from PMID: 33972779 | SOX2 + KLF5 |
| 2457 | RAPGEF5  | SOX2-KLF5 coregulated genes from PMID: 33972779 | SOX2 + KLF5 |
| 2458 | PHACTR4  | SOX2-KLF5 coregulated genes from PMID: 33972779 | SOX2 + KLF5 |
| 2459 | ZNF365   | SOX2-KLF5 coregulated genes from PMID: 33972779 | SOX2 + KLF5 |
| 2460 | ARFGAP3  | SOX2-KLF5 coregulated genes from PMID: 33972779 | SOX2 + KLF5 |
| 2461 | PACS1    | SOX2-KLF5 coregulated genes from PMID: 33972779 | SOX2 + KLF5 |
| 2462 | COL4A6   | SOX2-KLF5 coregulated genes from PMID: 33972779 | SOX2 + KLF5 |
| 2463 | IL20RB   | SOX2-KLF5 coregulated genes from PMID: 33972779 | SOX2 + KLF5 |
| 2464 | MREG     | SOX2-KLF5 coregulated genes from PMID: 33972779 | SOX2 + KLF5 |
| 2465 | TMEM200A | SOX2-KLF5 coregulated genes from PMID: 33972779 | SOX2 + KLF5 |
| 2466 | PKD2     | SOX2-KLF5 coregulated genes from PMID: 33972779 | SOX2 + KLF5 |
| 2467 | SOCS2    | SOX2-KLF5 coregulated genes from PMID: 33972779 | SOX2 + KLF5 |
| 2468 | MYH9     | SOX2-KLF5 coregulated genes from PMID: 33972779 | SOX2 + KLF5 |
| 2469 | ETS1     | SOX2-KLF5 coregulated genes from PMID: 33972779 | SOX2 + KLF5 |
| 2470 | CDK14    | SOX2-KLF5 coregulated genes from PMID: 33972779 | SOX2 + KLF5 |
| 2471 | NFKBIA   | SOX2-KLF5 coregulated genes from PMID: 33972779 | SOX2 + KLF5 |
| 2472 | GUCY1A2  | SOX2-KLF5 coregulated genes from PMID: 33972779 | SOX2 + KLF5 |
| 2473 | DTNBP1   | SOX2-KLF5 coregulated genes from PMID: 33972779 | SOX2 + KLF5 |
| 2474 | MAL2     | SOX2-KLF5 coregulated genes from PMID: 33972779 | SOX2 + KLF5 |
| 2475 | PDZRN3   | SOX2-KLF5 coregulated genes from PMID: 33972779 | SOX2 + KLF5 |
| 2476 | MRAS     | SOX2-KLF5 coregulated genes from PMID: 33972779 | SOX2 + KLF5 |
| 2477 | B3GAT1   | SOX2-KLF5 coregulated genes from PMID: 33972779 | SOX2 + KLF5 |
| 2478 | ADD2     | SOX2-KLF5 coregulated genes from PMID: 33972779 | SOX2 + KLF5 |
| 2479 | SGMS1    | SOX2-KLF5 coregulated genes from PMID: 33972779 | SOX2 + KLF5 |
| 2480 | IL1A     | SOX2-KLF5 coregulated genes from PMID: 33972779 | SOX2 + KLF5 |
| 2481 | RANBP17  | SOX2-KLF5 coregulated genes from PMID: 33972779 | SOX2 + KLF5 |
| 2482 | NUDT4    | SOX2-KLF5 coregulated genes from PMID: 33972779 | SOX2 + KLF5 |
| 2483 | TXNDC12  | SOX2-KLF5 coregulated genes from PMID: 33972779 | SOX2 + KLF5 |
| 2484 | PEBP1    | SOX2-KLF5 coregulated genes from PMID: 33972779 | SOX2 + KLF5 |
| 2485 | TMC1     | SOX2-KLF5 coregulated genes from PMID: 33972779 | SOX2 + KLF5 |
| 2486 | RBMS3    | SOX2-KLF5 coregulated genes from PMID: 33972779 | SOX2 + KLF5 |
| 2487 | LIPT2    | SOX2-KLF5 coregulated genes from PMID: 33972779 | SOX2 + KLF5 |
| 2488 | CDH6     | SOX2-KLF5 coregulated genes from PMID: 33972779 | SOX2 + KLF5 |
| 2489 | FAM3C    | SOX2-KLF5 coregulated genes from PMID: 33972779 | SOX2 + KLF5 |
| 2490 | GHR      | SOX2-KLF5 coregulated genes from PMID: 33972779 | SOX2 + KLF5 |
| 2491 | ALDH3A1  | SOX2-KLF5 coregulated genes from PMID: 33972779 | SOX2 + KLF5 |
| 2492 | EYA1     | SOX2-KLF5 coregulated genes from PMID: 33972779 | SOX2 + KLF5 |
| 2493 | LAMB1    | SOX2-KLF5 coregulated genes from PMID: 33972779 | SOX2 + KLF5 |
| 2494 | CDH11    | SOX2-KLF5 coregulated genes from PMID: 33972779 | SOX2 + KLF5 |
| 2495 | ESYT3    | SOX2-KLF5 coregulated genes from PMID: 33972779 | SOX2 + KLF5 |
| 2496 | BAIAP2L1 | SOX2-KLF5 coregulated genes from PMID: 33972779 | SOX2 + KLF5 |
| 2497 | CCDC88C  | SOX2-KLF5 coregulated genes from PMID: 33972779 | SOX2 + KLF5 |
| 2498 | HMGCLL1  | SOX2-KLF5 coregulated genes from PMID: 33972779 | SOX2 + KLF5 |
| 2499 | CMYA5    | SOX2-KLF5 coregulated genes from PMID: 33972779 | SOX2 + KLF5 |

|               |                                                 |             |
|---------------|-------------------------------------------------|-------------|
| 2500 TOX3     | SOX2-KLF5 coregulated genes from PMID: 33972779 | SOX2 + KLF5 |
| 2501 HS6ST1   | SOX2-KLF5 coregulated genes from PMID: 33972779 | SOX2 + KLF5 |
| 2502 MMP16    | SOX2-KLF5 coregulated genes from PMID: 33972779 | SOX2 + KLF5 |
| 2503 DMD      | SOX2-KLF5 coregulated genes from PMID: 33972779 | SOX2 + KLF5 |
| 2504 ARID5B   | SOX2-KLF5 coregulated genes from PMID: 33972779 | SOX2 + KLF5 |
| 2505 SYT17    | SOX2-KLF5 coregulated genes from PMID: 33972779 | SOX2 + KLF5 |
| 2506 PI15     | SOX2-KLF5 coregulated genes from PMID: 33972779 | SOX2 + KLF5 |
| 2507 EEA1     | SOX2-KLF5 coregulated genes from PMID: 33972779 | SOX2 + KLF5 |
| 2508 PRKD1    | SOX2-KLF5 coregulated genes from PMID: 33972779 | SOX2 + KLF5 |
| 2509 MCC      | SOX2-KLF5 coregulated genes from PMID: 33972779 | SOX2 + KLF5 |
| 2510 TRIM2    | SOX2-KLF5 coregulated genes from PMID: 33972779 | SOX2 + KLF5 |
| 2511 B4GALNT4 | SOX2-KLF5 coregulated genes from PMID: 33972779 | SOX2 + KLF5 |
| 2512 MPPED2   | SOX2-KLF5 coregulated genes from PMID: 33972779 | SOX2 + KLF5 |
| 2513 GIPC2    | SOX2-KLF5 coregulated genes from PMID: 33972779 | SOX2 + KLF5 |
| 2514 TEK      | SOX2-KLF5 coregulated genes from PMID: 33972779 | SOX2 + KLF5 |
| 2515 ROBO2    | SOX2-KLF5 coregulated genes from PMID: 33972779 | SOX2 + KLF5 |
| 2516 TJP2     | SOX2-KLF5 coregulated genes from PMID: 33972779 | SOX2 + KLF5 |
| 2517 KCNN2    | SOX2-KLF5 coregulated genes from PMID: 33972779 | SOX2 + KLF5 |
| 2518 NEGR1    | SOX2-KLF5 coregulated genes from PMID: 33972779 | SOX2 + KLF5 |
| 2519 GPHN     | SOX2-KLF5 coregulated genes from PMID: 33972779 | SOX2 + KLF5 |
| 2520 RNF19A   | SOX2-KLF5 coregulated genes from PMID: 33972779 | SOX2 + KLF5 |
| 2521 FAM181B  | SOX2-KLF5 coregulated genes from PMID: 33972779 | SOX2 + KLF5 |
| 2522 TM4SF1   | SOX2-KLF5 coregulated genes from PMID: 33972779 | SOX2 + KLF5 |
| 2523 UGCG     | SOX2-KLF5 coregulated genes from PMID: 33972779 | SOX2 + KLF5 |
| 2524 ATP10B   | SOX2-KLF5 coregulated genes from PMID: 33972779 | SOX2 + KLF5 |
| 2525 FKBP5    | SOX2-KLF5 coregulated genes from PMID: 33972779 | SOX2 + KLF5 |
| 2526 TGM7     | SOX2-KLF5 coregulated genes from PMID: 33972779 | SOX2 + KLF5 |
| 2527 PLA1A    | SOX2-KLF5 coregulated genes from PMID: 33972779 | SOX2 + KLF5 |
| 2528 NHLRC2   | SOX2-KLF5 coregulated genes from PMID: 33972779 | SOX2 + KLF5 |
| 2529 NDUFS4   | SOX2-KLF5 coregulated genes from PMID: 33972779 | SOX2 + KLF5 |
| 2530 AGPAT4   | SOX2-KLF5 coregulated genes from PMID: 33972779 | SOX2 + KLF5 |
| 2531 TULP4    | SOX2-KLF5 coregulated genes from PMID: 33972779 | SOX2 + KLF5 |
| 2532 EHF      | SOX2-KLF5 coregulated genes from PMID: 33972779 | SOX2 + KLF5 |
| 2533 SLC9A2   | SOX2-KLF5 coregulated genes from PMID: 33972779 | SOX2 + KLF5 |
| 2534 TNFSF15  | SOX2-KLF5 coregulated genes from PMID: 33972779 | SOX2 + KLF5 |
| 2535 GRM8     | SOX2-KLF5 coregulated genes from PMID: 33972779 | SOX2 + KLF5 |
| 2536 NUDT7    | SOX2-KLF5 coregulated genes from PMID: 33972779 | SOX2 + KLF5 |
| 2537 PARD3    | SOX2-KLF5 coregulated genes from PMID: 33972779 | SOX2 + KLF5 |
| 2538 SPRY1    | SOX2-KLF5 coregulated genes from PMID: 33972779 | SOX2 + KLF5 |
| 2539 EPHA3    | SOX2-KLF5 coregulated genes from PMID: 33972779 | SOX2 + KLF5 |
| 2540 PLB1     | SOX2-KLF5 coregulated genes from PMID: 33972779 | SOX2 + KLF5 |
| 2541 ANKH     | SOX2-KLF5 coregulated genes from PMID: 33972779 | SOX2 + KLF5 |
| 2542 DNAJC6   | SOX2-KLF5 coregulated genes from PMID: 33972779 | SOX2 + KLF5 |
| 2543 VEGFC    | SOX2-KLF5 coregulated genes from PMID: 33972779 | SOX2 + KLF5 |
| 2544 QKI      | SOX2-KLF5 coregulated genes from PMID: 33972779 | SOX2 + KLF5 |
| 2545 ADM      | SOX2-KLF5 coregulated genes from PMID: 33972779 | SOX2 + KLF5 |
| 2546 PODXL    | SOX2-KLF5 coregulated genes from PMID: 33972779 | SOX2 + KLF5 |
| 2547 PPP4R4   | SOX2-KLF5 coregulated genes from PMID: 33972779 | SOX2 + KLF5 |
| 2548 EPCAM    | SOX2-KLF5 coregulated genes from PMID: 33972779 | SOX2 + KLF5 |
| 2549 PTER     | SOX2-KLF5 coregulated genes from PMID: 33972779 | SOX2 + KLF5 |
| 2550 CEP68    | SOX2-KLF5 coregulated genes from PMID: 33972779 | SOX2 + KLF5 |
| 2551 CRADD    | SOX2-KLF5 coregulated genes from PMID: 33972779 | SOX2 + KLF5 |
| 2552 PTGR1    | SOX2-KLF5 coregulated genes from PMID: 33972779 | SOX2 + KLF5 |
| 2553 EPGN     | SOX2-KLF5 coregulated genes from PMID: 33972779 | SOX2 + KLF5 |
| 2554 BTG1     | SOX2-KLF5 coregulated genes from PMID: 33972779 | SOX2 + KLF5 |
| 2555 ARMCX1   | SOX2-KLF5 coregulated genes from PMID: 33972779 | SOX2 + KLF5 |
| 2556 KLHL8    | SOX2-KLF5 coregulated genes from PMID: 33972779 | SOX2 + KLF5 |
| 2557 ALDH5A1  | SOX2-KLF5 coregulated genes from PMID: 33972779 | SOX2 + KLF5 |
| 2558 CAMK4    | SOX2-KLF5 coregulated genes from PMID: 33972779 | SOX2 + KLF5 |
| 2559 ARG1     | SOX2-KLF5 coregulated genes from PMID: 33972779 | SOX2 + KLF5 |
| 2560 NEURL1B  | SOX2-KLF5 coregulated genes from PMID: 33972779 | SOX2 + KLF5 |

|               |                                                 |             |
|---------------|-------------------------------------------------|-------------|
| 2561 FAM110C  | SOX2-KLF5 coregulated genes from PMID: 33972779 | SOX2 + KLF5 |
| 2562 SLC25A25 | SOX2-KLF5 coregulated genes from PMID: 33972779 | SOX2 + KLF5 |
| 2563 ANKRD6   | SOX2-KLF5 coregulated genes from PMID: 33972779 | SOX2 + KLF5 |
| 2564 MAP3K8   | SOX2-KLF5 coregulated genes from PMID: 33972779 | SOX2 + KLF5 |
| 2565 ALCAM    | SOX2-KLF5 coregulated genes from PMID: 33972779 | SOX2 + KLF5 |
| 2566 JPH1     | SOX2-KLF5 coregulated genes from PMID: 33972779 | SOX2 + KLF5 |
| 2567 DNAJC21  | SOX2-KLF5 coregulated genes from PMID: 33972779 | SOX2 + KLF5 |
| 2568 SESTD1   | SOX2-KLF5 coregulated genes from PMID: 33972779 | SOX2 + KLF5 |
| 2569 SRL      | SOX2-KLF5 coregulated genes from PMID: 33972779 | SOX2 + KLF5 |
| 2570 ARHGEF12 | SOX2-KLF5 coregulated genes from PMID: 33972779 | SOX2 + KLF5 |
| 2571 SORBS2   | SOX2-KLF5 coregulated genes from PMID: 33972779 | SOX2 + KLF5 |
| 2572 EFEMP1   | SOX2-KLF5 coregulated genes from PMID: 33972779 | SOX2 + KLF5 |
| 2573 MBNL3    | SOX2-KLF5 coregulated genes from PMID: 33972779 | SOX2 + KLF5 |
| 2574 KHDRBS3  | SOX2-KLF5 coregulated genes from PMID: 33972779 | SOX2 + KLF5 |
| 2575 MFAP3L   | SOX2-KLF5 coregulated genes from PMID: 33972779 | SOX2 + KLF5 |
| 2576 MEGF9    | SOX2-KLF5 coregulated genes from PMID: 33972779 | SOX2 + KLF5 |
| 2577 GLIS3    | SOX2-KLF5 coregulated genes from PMID: 33972779 | SOX2 + KLF5 |
| 2578 PAIP2B   | SOX2-KLF5 coregulated genes from PMID: 33972779 | SOX2 + KLF5 |
| 2579 CX3CL1   | SOX2-KLF5 coregulated genes from PMID: 33972779 | SOX2 + KLF5 |
| 2580 PFN2     | SOX2-KLF5 coregulated genes from PMID: 33972779 | SOX2 + KLF5 |
| 2581 MBOAT2   | SOX2-KLF5 coregulated genes from PMID: 33972779 | SOX2 + KLF5 |
| 2582 TBC1D30  | SOX2-KLF5 coregulated genes from PMID: 33972779 | SOX2 + KLF5 |
| 2583 NUAQ2    | SOX2-KLF5 coregulated genes from PMID: 33972779 | SOX2 + KLF5 |
| 2584 IL6R     | SOX2-KLF5 coregulated genes from PMID: 33972779 | SOX2 + KLF5 |
| 2585 B3GNT2   | SOX2-KLF5 coregulated genes from PMID: 33972779 | SOX2 + KLF5 |
| 2586 PBX1     | SOX2-KLF5 coregulated genes from PMID: 33972779 | SOX2 + KLF5 |
| 2587 TBCA     | SOX2-KLF5 coregulated genes from PMID: 33972779 | SOX2 + KLF5 |
| 2588 SETD5    | SOX2-KLF5 coregulated genes from PMID: 33972779 | SOX2 + KLF5 |
| 2589 KLHL29   | SOX2-KLF5 coregulated genes from PMID: 33972779 | SOX2 + KLF5 |
| 2590 DGKG     | SOX2-KLF5 coregulated genes from PMID: 33972779 | SOX2 + KLF5 |
| 2591 LITAF    | SOX2-KLF5 coregulated genes from PMID: 33972779 | SOX2 + KLF5 |
| 2592 ST14     | SOX2-KLF5 coregulated genes from PMID: 33972779 | SOX2 + KLF5 |
| 2593 RBPJ     | SOX2-KLF5 coregulated genes from PMID: 33972779 | SOX2 + KLF5 |
| 2594 ADAM12   | SOX2-KLF5 coregulated genes from PMID: 33972779 | SOX2 + KLF5 |
| 2595 SLC4A3   | SOX2-KLF5 coregulated genes from PMID: 33972779 | SOX2 + KLF5 |
| 2596 CCDC141  | SOX2-KLF5 coregulated genes from PMID: 33972779 | SOX2 + KLF5 |
| 2597 IDH2     | SOX2-KLF5 coregulated genes from PMID: 33972779 | SOX2 + KLF5 |
| 2598 TNRC18   | SOX2-KLF5 coregulated genes from PMID: 33972779 | SOX2 + KLF5 |
| 2599 CDH13    | SOX2-KLF5 coregulated genes from PMID: 33972779 | SOX2 + KLF5 |
| 2600 MPZL1    | SOX2-KLF5 coregulated genes from PMID: 33972779 | SOX2 + KLF5 |
| 2601 TXNRD1   | SOX2-KLF5 coregulated genes from PMID: 33972779 | SOX2 + KLF5 |
| 2602 TANC2    | SOX2-KLF5 coregulated genes from PMID: 33972779 | SOX2 + KLF5 |
| 2603 RGS4     | SOX2-KLF5 coregulated genes from PMID: 33972779 | SOX2 + KLF5 |
| 2604 IL10     | SOX2-KLF5 coregulated genes from PMID: 33972779 | SOX2 + KLF5 |
| 2605 KRT19    | SOX2-KLF5 coregulated genes from PMID: 33972779 | SOX2 + KLF5 |
| 2606 ARHGAP18 | SOX2-KLF5 coregulated genes from PMID: 33972779 | SOX2 + KLF5 |
| 2607 MEGF11   | SOX2-KLF5 coregulated genes from PMID: 33972779 | SOX2 + KLF5 |
| 2608 KIRREL1  | SOX2-KLF5 coregulated genes from PMID: 33972779 | SOX2 + KLF5 |
| 2609 SLC13A2  | SOX2-KLF5 coregulated genes from PMID: 33972779 | SOX2 + KLF5 |
| 2610 ALOX12   | SOX2-KLF5 coregulated genes from PMID: 33972779 | SOX2 + KLF5 |
| 2611 SHISA6   | SOX2-KLF5 coregulated genes from PMID: 33972779 | SOX2 + KLF5 |
| 2612 SMOC2    | SOX2-KLF5 coregulated genes from PMID: 33972779 | SOX2 + KLF5 |
| 2613 NRXN1    | SOX2-KLF5 coregulated genes from PMID: 33972779 | SOX2 + KLF5 |
| 2614 RGL1     | SOX2-KLF5 coregulated genes from PMID: 33972779 | SOX2 + KLF5 |
| 2615 SOX6     | SOX2-KLF5 coregulated genes from PMID: 33972779 | SOX2 + KLF5 |
| 2616 CTNND2   | SOX2-KLF5 coregulated genes from PMID: 33972779 | SOX2 + KLF5 |
| 2617 BLNK     | SOX2-KLF5 coregulated genes from PMID: 33972779 | SOX2 + KLF5 |
| 2618 RARRES1  | SOX2-KLF5 coregulated genes from PMID: 33972779 | SOX2 + KLF5 |
| 2619 NMNAT2   | SOX2-KLF5 coregulated genes from PMID: 33972779 | SOX2 + KLF5 |
| 2620 PPL      | SOX2-KLF5 coregulated genes from PMID: 33972779 | SOX2 + KLF5 |
| 2621 CADPS2   | SOX2-KLF5 coregulated genes from PMID: 33972779 | SOX2 + KLF5 |

|               |                                                 |             |
|---------------|-------------------------------------------------|-------------|
| 2622 EFNA5    | SOX2-KLF5 coregulated genes from PMID: 33972779 | SOX2 + KLF5 |
| 2623 UTRN     | SOX2-KLF5 coregulated genes from PMID: 33972779 | SOX2 + KLF5 |
| 2624 PKP1     | SOX2-KLF5 coregulated genes from PMID: 33972779 | SOX2 + KLF5 |
| 2625 KCNJ2    | SOX2-KLF5 coregulated genes from PMID: 33972779 | SOX2 + KLF5 |
| 2626 NUDT4B   | SOX2-KLF5 coregulated genes from PMID: 33972779 | SOX2 + KLF5 |
| 2627 ATP1B1   | SOX2-KLF5 coregulated genes from PMID: 33972779 | SOX2 + KLF5 |
| 2628 FAM43A   | SOX2-KLF5 coregulated genes from PMID: 33972779 | SOX2 + KLF5 |
| 2629 ADRB1    | SOX2-KLF5 coregulated genes from PMID: 33972779 | SOX2 + KLF5 |
| 2630 LYPD6B   | SOX2-KLF5 coregulated genes from PMID: 33972779 | SOX2 + KLF5 |
| 2631 TNK2     | SOX2-KLF5 coregulated genes from PMID: 33972779 | SOX2 + KLF5 |
| 2632 LY96     | SOX2-KLF5 coregulated genes from PMID: 33972779 | SOX2 + KLF5 |
| 2633 OTOP1    | SOX2-KLF5 coregulated genes from PMID: 33972779 | SOX2 + KLF5 |
| 2634 HDAC9    | SOX2-KLF5 coregulated genes from PMID: 33972779 | SOX2 + KLF5 |
| 2635 IQGAP1   | SOX2-KLF5 coregulated genes from PMID: 33972779 | SOX2 + KLF5 |
| 2636 PLD1     | SOX2-KLF5 coregulated genes from PMID: 33972779 | SOX2 + KLF5 |
| 2637 SMPDL3B  | SOX2-KLF5 coregulated genes from PMID: 33972779 | SOX2 + KLF5 |
| 2638 KCNK1    | SOX2-KLF5 coregulated genes from PMID: 33972779 | SOX2 + KLF5 |
| 2639 IRAK2    | SOX2-KLF5 coregulated genes from PMID: 33972779 | SOX2 + KLF5 |
| 2640 TMEM161B | SOX2-KLF5 coregulated genes from PMID: 33972779 | SOX2 + KLF5 |
| 2641 RC3H1    | SOX2-KLF5 coregulated genes from PMID: 33972779 | SOX2 + KLF5 |
| 2642 HHAT     | SOX2-KLF5 coregulated genes from PMID: 33972779 | SOX2 + KLF5 |
| 2643 IRS1     | SOX2-KLF5 coregulated genes from PMID: 33972779 | SOX2 + KLF5 |
| 2644 CNIH4    | SOX2-KLF5 coregulated genes from PMID: 33972779 | SOX2 + KLF5 |
| 2645 ITGA6    | SOX2-KLF5 coregulated genes from PMID: 33972779 | SOX2 + KLF5 |
| 2646 RAB43    | SOX2-KLF5 coregulated genes from PMID: 33972779 | SOX2 + KLF5 |
| 2647 EPHA7    | SOX2-KLF5 coregulated genes from PMID: 33972779 | SOX2 + KLF5 |
| 2648 CFTR     | SOX2-KLF5 coregulated genes from PMID: 33972779 | SOX2 + KLF5 |
| 2649 ADAM9    | SOX2-KLF5 coregulated genes from PMID: 33972779 | SOX2 + KLF5 |
| 2650 SPRY4    | SOX2-KLF5 coregulated genes from PMID: 33972779 | SOX2 + KLF5 |
| 2651 ST3GAL3  | SOX2-KLF5 coregulated genes from PMID: 33972779 | SOX2 + KLF5 |
| 2652 BTG2     | SOX2-KLF5 coregulated genes from PMID: 33972779 | SOX2 + KLF5 |
| 2653 NFKBIZ   | SOX2-KLF5 coregulated genes from PMID: 33972779 | SOX2 + KLF5 |
| 2654 PGBD1    | SOX2-KLF5 coregulated genes from PMID: 33972779 | SOX2 + KLF5 |
| 2655 LPCAT4   | SOX2-KLF5 coregulated genes from PMID: 33972779 | SOX2 + KLF5 |
| 2656 RFFL     | SOX2-KLF5 coregulated genes from PMID: 33972779 | SOX2 + KLF5 |
| 2657 NOS1AP   | SOX2-KLF5 coregulated genes from PMID: 33972779 | SOX2 + KLF5 |
| 2658 CLSTN2   | SOX2-KLF5 coregulated genes from PMID: 33972779 | SOX2 + KLF5 |
| 2659 CLDN4    | SOX2-KLF5 coregulated genes from PMID: 33972779 | SOX2 + KLF5 |
| 2660 SLC25A24 | SOX2-KLF5 coregulated genes from PMID: 33972779 | SOX2 + KLF5 |
| 2661 GGH      | SOX2-KLF5 coregulated genes from PMID: 33972779 | SOX2 + KLF5 |
| 2662 ROCK2    | SOX2-KLF5 coregulated genes from PMID: 33972779 | SOX2 + KLF5 |
| 2663 ARHGAP20 | SOX2-KLF5 coregulated genes from PMID: 33972779 | SOX2 + KLF5 |
| 2664 DNMT3    | SOX2-KLF5 coregulated genes from PMID: 33972779 | SOX2 + KLF5 |
| 2665 GRIP1    | SOX2-KLF5 coregulated genes from PMID: 33972779 | SOX2 + KLF5 |
| 2666 CHMP2B   | SOX2-KLF5 coregulated genes from PMID: 33972779 | SOX2 + KLF5 |
| 2667 CAPN2    | SOX2-KLF5 coregulated genes from PMID: 33972779 | SOX2 + KLF5 |
| 2668 ELF3     | SOX2-KLF5 coregulated genes from PMID: 33972779 | SOX2 + KLF5 |
| 2669 BMPR2    | SOX2-KLF5 coregulated genes from PMID: 33972779 | SOX2 + KLF5 |
| 2670 EIF4G3   | SOX2-KLF5 coregulated genes from PMID: 33972779 | SOX2 + KLF5 |
| 2671 DSP      | SOX2-KLF5 coregulated genes from PMID: 33972779 | SOX2 + KLF5 |
| 2672 ERC1     | SOX2-KLF5 coregulated genes from PMID: 33972779 | SOX2 + KLF5 |
| 2673 QSOX1    | SOX2-KLF5 coregulated genes from PMID: 33972779 | SOX2 + KLF5 |
| 2674 KRT20    | SOX2-KLF5 coregulated genes from PMID: 33972779 | SOX2 + KLF5 |
| 2675 ACOX1    | SOX2-KLF5 coregulated genes from PMID: 33972779 | SOX2 + KLF5 |
| 2676 RASGRP1  | SOX2-KLF5 coregulated genes from PMID: 33972779 | SOX2 + KLF5 |
| 2677 HMCN1    | SOX2-KLF5 coregulated genes from PMID: 33972779 | SOX2 + KLF5 |
| 2678 TNFAIP3  | SOX2-KLF5 coregulated genes from PMID: 33972779 | SOX2 + KLF5 |
| 2679 NGEF     | SOX2-KLF5 coregulated genes from PMID: 33972779 | SOX2 + KLF5 |
| 2680 ATP10A   | SOX2-KLF5 coregulated genes from PMID: 33972779 | SOX2 + KLF5 |
| 2681 LMNA     | SOX2-KLF5 coregulated genes from PMID: 33972779 | SOX2 + KLF5 |
| 2682 C3orf52  | SOX2-KLF5 coregulated genes from PMID: 33972779 | SOX2 + KLF5 |

|                 |                                                 |             |
|-----------------|-------------------------------------------------|-------------|
| 2683 DST        | SOX2-KLF5 coregulated genes from PMID: 33972779 | SOX2 + KLF5 |
| 2684 SGM52      | SOX2-KLF5 coregulated genes from PMID: 33972779 | SOX2 + KLF5 |
| 2685 FAM189B    | SOX2-KLF5 coregulated genes from PMID: 33972779 | SOX2 + KLF5 |
| 2686 EZR        | SOX2-KLF5 coregulated genes from PMID: 33972779 | SOX2 + KLF5 |
| 2687 CASQ2      | SOX2-KLF5 coregulated genes from PMID: 33972779 | SOX2 + KLF5 |
| 2688 CSGALNACT1 | SOX2-KLF5 coregulated genes from PMID: 33972779 | SOX2 + KLF5 |
| 2689 ZNF362     | SOX2-KLF5 coregulated genes from PMID: 33972779 | SOX2 + KLF5 |
| 2690 ACAD9      | SOX2-KLF5 coregulated genes from PMID: 33972779 | SOX2 + KLF5 |
| 2691 CDC42EP3   | SOX2-KLF5 coregulated genes from PMID: 33972779 | SOX2 + KLF5 |
| 2692 LIMA1      | SOX2-KLF5 coregulated genes from PMID: 33972779 | SOX2 + KLF5 |
| 2693 NR4A1      | SOX2-KLF5 coregulated genes from PMID: 33972779 | SOX2 + KLF5 |
| 2694 NRP2       | SOX2-KLF5 coregulated genes from PMID: 33972779 | SOX2 + KLF5 |
| 2695 ODC1       | SOX2-KLF5 coregulated genes from PMID: 33972779 | SOX2 + KLF5 |
| 2696 ACVR1      | SOX2-KLF5 coregulated genes from PMID: 33972779 | SOX2 + KLF5 |
| 2697 FAM126A    | SOX2-KLF5 coregulated genes from PMID: 33972779 | SOX2 + KLF5 |
| 2698 IFIH1      | SOX2-KLF5 coregulated genes from PMID: 33972779 | SOX2 + KLF5 |
| 2699 SYTL3      | SOX2-KLF5 coregulated genes from PMID: 33972779 | SOX2 + KLF5 |
| 2700 SMG7       | SOX2-KLF5 coregulated genes from PMID: 33972779 | SOX2 + KLF5 |
| 2701 SGK1       | SOX2-KLF5 coregulated genes from PMID: 33972779 | SOX2 + KLF5 |
| 2702 IL18RAP    | SOX2-KLF5 coregulated genes from PMID: 33972779 | SOX2 + KLF5 |
| 2703 LFNG       | SOX2-KLF5 coregulated genes from PMID: 33972779 | SOX2 + KLF5 |
| 2704 SLC4A7     | SOX2-KLF5 coregulated genes from PMID: 33972779 | SOX2 + KLF5 |
| 2705 C3orf70    | SOX2-KLF5 coregulated genes from PMID: 33972779 | SOX2 + KLF5 |
| 2706 LAMC2      | SOX2-KLF5 coregulated genes from PMID: 33972779 | SOX2 + KLF5 |
| 2707 EIF1       | SOX2-KLF5 coregulated genes from PMID: 33972779 | SOX2 + KLF5 |
| 2708 SFXN3      | SOX2-KLF5 coregulated genes from PMID: 33972779 | SOX2 + KLF5 |
| 2709 MBNL1      | SOX2-KLF5 coregulated genes from PMID: 33972779 | SOX2 + KLF5 |
| 2710 NHL1       | SOX2-KLF5 coregulated genes from PMID: 33972779 | SOX2 + KLF5 |
| 2711 KIT        | SOX2-KLF5 coregulated genes from PMID: 33972779 | SOX2 + KLF5 |
| 2712 GBP2       | SOX2-KLF5 coregulated genes from PMID: 33972779 | SOX2 + KLF5 |
| 2713 PLD5       | SOX2-KLF5 coregulated genes from PMID: 33972779 | SOX2 + KLF5 |
| 2714 STC2       | SOX2-KLF5 coregulated genes from PMID: 33972779 | SOX2 + KLF5 |
| 2715 RGSS5      | SOX2-KLF5 coregulated genes from PMID: 33972779 | SOX2 + KLF5 |
| 2716 ASPA       | SOX2-KLF5 coregulated genes from PMID: 33972779 | SOX2 + KLF5 |
| 2717 GBP5       | SOX2-KLF5 coregulated genes from PMID: 33972779 | SOX2 + KLF5 |
| 2718 RPRM       | SOX2-KLF5 coregulated genes from PMID: 33972779 | SOX2 + KLF5 |
| 2719 FOXP1      | SOX2-KLF5 coregulated genes from PMID: 33972779 | SOX2 + KLF5 |
| 2720 AMIGO1     | SOX2-KLF5 coregulated genes from PMID: 33972779 | SOX2 + KLF5 |
| 2721 PDE4DIP    | SOX2-KLF5 coregulated genes from PMID: 33972779 | SOX2 + KLF5 |
| 2722 SNRNP48    | SOX2-KLF5 coregulated genes from PMID: 33972779 | SOX2 + KLF5 |
| 2723 PXDN       | SOX2-KLF5 coregulated genes from PMID: 33972779 | SOX2 + KLF5 |
| 2724 SULT2B1    | SOX2-KLF5 coregulated genes from PMID: 33972779 | SOX2 + KLF5 |
| 2725 CRYZ       | SOX2-KLF5 coregulated genes from PMID: 33972779 | SOX2 + KLF5 |
| 2726 THBS2      | SOX2-KLF5 coregulated genes from PMID: 33972779 | SOX2 + KLF5 |
| 2727 STAC       | SOX2-KLF5 coregulated genes from PMID: 33972779 | SOX2 + KLF5 |
| 2728 SLC6A6     | SOX2-KLF5 coregulated genes from PMID: 33972779 | SOX2 + KLF5 |
| 2729 SPPL3      | SOX2-KLF5 coregulated genes from PMID: 33972779 | SOX2 + KLF5 |
| 2730 LPGAT1     | SOX2-KLF5 coregulated genes from PMID: 33972779 | SOX2 + KLF5 |
| 2731 CLDN1      | SOX2-KLF5 coregulated genes from PMID: 33972779 | SOX2 + KLF5 |
| 2732 PDLIM4     | SOX2-KLF5 coregulated genes from PMID: 33972779 | SOX2 + KLF5 |
| 2733 EPN2       | SOX2-KLF5 coregulated genes from PMID: 33972779 | SOX2 + KLF5 |
| 2734 JUN        | SOX2-KLF5 coregulated genes from PMID: 33972779 | SOX2 + KLF5 |
| 2735 TNIP1      | SOX2-KLF5 coregulated genes from PMID: 33972779 | SOX2 + KLF5 |
| 2736 S1PR1      | SOX2-KLF5 coregulated genes from PMID: 33972779 | SOX2 + KLF5 |
| 2737 CD9        | SOX2-KLF5 coregulated genes from PMID: 33972779 | SOX2 + KLF5 |
| 2738 ANGPT1     | SOX2-KLF5 coregulated genes from PMID: 33972779 | SOX2 + KLF5 |
| 2739 SLC6A2     | SOX2-KLF5 coregulated genes from PMID: 33972779 | SOX2 + KLF5 |
| 2740 RBFOX1     | SOX2-KLF5 coregulated genes from PMID: 33972779 | SOX2 + KLF5 |
| 2741 DGKI       | SOX2-KLF5 coregulated genes from PMID: 33972779 | SOX2 + KLF5 |
| 2742 ATXN1      | SOX2-KLF5 coregulated genes from PMID: 33972779 | SOX2 + KLF5 |
| 2743 SOX13      | SOX2-KLF5 coregulated genes from PMID: 33972779 | SOX2 + KLF5 |

|               |                                                 |             |
|---------------|-------------------------------------------------|-------------|
| 2744 VCAM1    | SOX2-KLF5 coregulated genes from PMID: 33972779 | SOX2 + KLF5 |
| 2745 TFCEP2L1 | SOX2-KLF5 coregulated genes from PMID: 33972779 | SOX2 + KLF5 |
| 2746 LRRC8B   | SOX2-KLF5 coregulated genes from PMID: 33972779 | SOX2 + KLF5 |
| 2747 MACF1    | SOX2-KLF5 coregulated genes from PMID: 33972779 | SOX2 + KLF5 |
| 2748 TP63     | SOX2-KLF5 coregulated genes from PMID: 33972779 | SOX2 + KLF5 |
| 2749 DUSP1    | SOX2-KLF5 coregulated genes from PMID: 33972779 | SOX2 + KLF5 |
| 2750 SLC16A11 | SOX2-KLF5 coregulated genes from PMID: 33972779 | SOX2 + KLF5 |
| 2751 PLS1     | SOX2-KLF5 coregulated genes from PMID: 33972779 | SOX2 + KLF5 |
| 2752 ABCB11   | SOX2-KLF5 coregulated genes from PMID: 33972779 | SOX2 + KLF5 |
| 2753 HS3ST3A1 | SOX2-KLF5 coregulated genes from PMID: 33972779 | SOX2 + KLF5 |
| 2754 ANGPTL4  | SOX2-KLF5 coregulated genes from PMID: 33972779 | SOX2 + KLF5 |
| 2755 HRH1     | SOX2-KLF5 coregulated genes from PMID: 33972779 | SOX2 + KLF5 |
| 2756 GNB4     | SOX2-KLF5 coregulated genes from PMID: 33972779 | SOX2 + KLF5 |
| 2757 CNN3     | SOX2-KLF5 coregulated genes from PMID: 33972779 | SOX2 + KLF5 |
| 2758 CREG1    | SOX2-KLF5 coregulated genes from PMID: 33972779 | SOX2 + KLF5 |
| 2759 RNF19B   | SOX2-KLF5 coregulated genes from PMID: 33972779 | SOX2 + KLF5 |
| 2760 PDE4D    | SOX2-KLF5 coregulated genes from PMID: 33972779 | SOX2 + KLF5 |
| 2761 MDFIC    | SOX2-KLF5 coregulated genes from PMID: 33972779 | SOX2 + KLF5 |
| 2762 BCL2L15  | SOX2-KLF5 coregulated genes from PMID: 33972779 | SOX2 + KLF5 |
| 2763 TRIO     | SOX2-KLF5 coregulated genes from PMID: 33972779 | SOX2 + KLF5 |
| 2764 LPAR3    | SOX2-KLF5 coregulated genes from PMID: 33972779 | SOX2 + KLF5 |
| 2765 GOLIM4   | SOX2-KLF5 coregulated genes from PMID: 33972779 | SOX2 + KLF5 |
| 2766 MYH14    | SOX2-KLF5 coregulated genes from PMID: 33972779 | SOX2 + KLF5 |
| 2767 VIM      | SOX2-KLF5 coregulated genes from PMID: 33972779 | SOX2 + KLF5 |
| 2768 COL4A3   | SOX2-KLF5 coregulated genes from PMID: 33972779 | SOX2 + KLF5 |
| 2769 PTPRJ    | SOX2-KLF5 coregulated genes from PMID: 33972779 | SOX2 + KLF5 |
| 2770 NWD1     | SOX2-KLF5 coregulated genes from PMID: 33972779 | SOX2 + KLF5 |
| 2771 MNDA     | SOX2-KLF5 coregulated genes from PMID: 33972779 | SOX2 + KLF5 |
| 2772 SLC25A10 | SOX2-KLF5 coregulated genes from PMID: 33972779 | SOX2 + KLF5 |
| 2773 PRMT6    | SOX2-KLF5 coregulated genes from PMID: 33972779 | SOX2 + KLF5 |
| 2774 PTGS2    | SOX2-KLF5 coregulated genes from PMID: 33972779 | SOX2 + KLF5 |
| 2775 CCL20    | SOX2-KLF5 coregulated genes from PMID: 33972779 | SOX2 + KLF5 |
| 2776 RARB     | SOX2-KLF5 coregulated genes from PMID: 33972779 | SOX2 + KLF5 |
| 2777 TWF2     | SOX2-KLF5 coregulated genes from PMID: 33972779 | SOX2 + KLF5 |
| 2778 DHRS9    | SOX2-KLF5 coregulated genes from PMID: 33972779 | SOX2 + KLF5 |
| 2779 SH3PXD2A | SOX2-KLF5 coregulated genes from PMID: 33972779 | SOX2 + KLF5 |
| 2780 PLEKHM3  | SOX2-KLF5 coregulated genes from PMID: 33972779 | SOX2 + KLF5 |
| 2781 AFF1     | SOX2-KLF5 coregulated genes from PMID: 33972779 | SOX2 + KLF5 |
| 2782 TRIM33   | SOX2-KLF5 coregulated genes from PMID: 33972779 | SOX2 + KLF5 |
| 2783 LRIG1    | SOX2-KLF5 coregulated genes from PMID: 33972779 | SOX2 + KLF5 |
| 2784 SIPA1L2  | SOX2-KLF5 coregulated genes from PMID: 33972779 | SOX2 + KLF5 |
| 2785 ABR      | SOX2-KLF5 coregulated genes from PMID: 33972779 | SOX2 + KLF5 |
| 2786 NUA1     | SOX2-KLF5 coregulated genes from PMID: 33972779 | SOX2 + KLF5 |
| 2787 RAP2B    | SOX2-KLF5 coregulated genes from PMID: 33972779 | SOX2 + KLF5 |
| 2788 KRT8     | SOX2-KLF5 coregulated genes from PMID: 33972779 | SOX2 + KLF5 |
| 2789 SEMA6A   | SOX2-KLF5 coregulated genes from PMID: 33972779 | SOX2 + KLF5 |
| 2790 SBF2     | SOX2-KLF5 coregulated genes from PMID: 33972779 | SOX2 + KLF5 |
| 2791 LRRC8C   | SOX2-KLF5 coregulated genes from PMID: 33972779 | SOX2 + KLF5 |
| 2792 IQGAP2   | SOX2-KLF5 coregulated genes from PMID: 33972779 | SOX2 + KLF5 |
| 2793 BMP2     | SOX2 regulated genes from PMID: 20726797        | SOX2        |
| 2794 BMP4     | SOX2 regulated genes from PMID: 20726797        | SOX2        |
| 2795 BMPR2    | SOX2 regulated genes from PMID: 20726797        | SOX2        |
| 2796 PCSK6    | SOX2 regulated genes from PMID: 20726797        | SOX2        |
| 2797 SMAD5    | SOX2 regulated genes from PMID: 20726797        | SOX2        |
| 2798 SMAD6    | SOX2 regulated genes from PMID: 20726797        | SOX2        |
| 2799 SMAD7    | SOX2 regulated genes from PMID: 20726797        | SOX2        |
| 2800 SMURF1   | SOX2 regulated genes from PMID: 20726797        | SOX2        |
| 2801 IGF1R    | SOX2 regulated genes from PMID: 20726797        | SOX2        |
| 2802 GNA15    | SOX2 regulated genes from PMID: 20726797        | SOX2        |
| 2803 TGFB2    | SOX2 regulated genes from PMID: 20726797        | SOX2        |
| 2804 RGS3     | SOX2 regulated genes from PMID: 20726797        | SOX2        |



|              |                                          |      |
|--------------|------------------------------------------|------|
| 2805 FGFR3   | SOX2 regulated genes from PMID: 20726797 | SOX2 |
| 2806 IL6ST   | SOX2 regulated genes from PMID: 20726797 | SOX2 |
| 2807 EREG    | SOX2 regulated genes from PMID: 20726797 | SOX2 |
| 2808 SOCS5   | SOX2 regulated genes from PMID: 20726797 | SOX2 |
| 2809 IRAK1   | SOX2 regulated genes from PMID: 20726797 | SOX2 |
| 2810 PIK3R1  | SOX2 regulated genes from PMID: 20726797 | SOX2 |
| 2811 EDN1    | SOX2 regulated genes from PMID: 20726797 | SOX2 |
| 2812 OPN3    | SOX2 regulated genes from PMID: 20726797 | SOX2 |
| 2813 PYCARD  | SOX2 regulated genes from PMID: 20726797 | SOX2 |
| 2814 SIGIRR  | SOX2 regulated genes from PMID: 20726797 | SOX2 |
| 2815 CD24    | SOX2 regulated genes from PMID: 20726797 | SOX2 |
| 2816 AGRN    | SOX2 regulated genes from PMID: 20726797 | SOX2 |
| 2817 RHOQ    | SOX2 regulated genes from PMID: 20726797 | SOX2 |
| 2818 IRS1    | SOX2 regulated genes from PMID: 20726797 | SOX2 |
| 2819 MAML3   | SOX2 regulated genes from PMID: 20726797 | SOX2 |
| 2820 GNB2    | SOX2 regulated genes from PMID: 20726797 | SOX2 |
| 2821 COL16A1 | SOX2 regulated genes from PMID: 20726797 | SOX2 |
| 2822 MTSS1   | SOX2 regulated genes from PMID: 20726797 | SOX2 |
| 2823 TRIB1   | SOX2 regulated genes from PMID: 20726797 | SOX2 |
| 2824 PTK2    | SOX2 regulated genes from PMID: 20726797 | SOX2 |
| 2825 IFITM1  | SOX2 regulated genes from PMID: 20726797 | SOX2 |
| 2826 ACVR1   | SOX2 regulated genes from PMID: 20726797 | SOX2 |
| 2827 CCRL2   | SOX2 regulated genes from PMID: 20726797 | SOX2 |
| 2828 TACSTD2 | SOX2 regulated genes from PMID: 20726797 | SOX2 |
| 2829 PTPRF   | SOX2 regulated genes from PMID: 20726797 | SOX2 |
| 2830 SMAD3   | SOX2 regulated genes from PMID: 20726797 | SOX2 |
| 2831 DGKQ    | SOX2 regulated genes from PMID: 20726797 | SOX2 |
| 2832 SRC     | SOX2 regulated genes from PMID: 20726797 | SOX2 |
| 2833 EGFR    | SOX2 regulated genes from PMID: 20726797 | SOX2 |
| 2834 DGKH    | SOX2 regulated genes from PMID: 20726797 | SOX2 |
| 2835 KLK6    | SOX2 regulated genes from PMID: 20726797 | SOX2 |
| 2836 GAB1    | SOX2 regulated genes from PMID: 20726797 | SOX2 |
| 2837 VIPR1   | SOX2 regulated genes from PMID: 20726797 | SOX2 |
| 2838 PARD3   | SOX2 regulated genes from PMID: 20726797 | SOX2 |
| 2839 CD14    | SOX2 regulated genes from PMID: 20726797 | SOX2 |
| 2840 ROR1    | SOX2 regulated genes from PMID: 20726797 | SOX2 |
| 2841 ADAM17  | SOX2 regulated genes from PMID: 20726797 | SOX2 |
| 2842 ADAM10  | SOX2 regulated genes from PMID: 20726797 | SOX2 |
| 2843 NUP62   | SOX2 regulated genes from PMID: 20726797 | SOX2 |
| 2844 LEPR    | SOX2 regulated genes from PMID: 20726797 | SOX2 |
| 2845 P2RY2   | SOX2 regulated genes from PMID: 20726797 | SOX2 |
| 2846 AFAP1L2 | SOX2 regulated genes from PMID: 20726797 | SOX2 |
| 2847 AREG    | SOX2 regulated genes from PMID: 20726797 | SOX2 |
| 2848 HPGD    | SOX2 regulated genes from PMID: 20726797 | SOX2 |
| 2849 STAT3   | SOX2 regulated genes from PMID: 20726797 | SOX2 |
| 2850 CXCL1   | SOX2 regulated genes from PMID: 20726797 | SOX2 |
| 2851 GPR37   | SOX2 regulated genes from PMID: 20726797 | SOX2 |
| 2852 CD59    | SOX2 regulated genes from PMID: 20726797 | SOX2 |
| 2853 LY6E    | SOX2 regulated genes from PMID: 20726797 | SOX2 |
| 2854 CBLC    | SOX2 regulated genes from PMID: 20726797 | SOX2 |
| 2855 PSENEN  | SOX2 regulated genes from PMID: 20726797 | SOX2 |
| 2856 THBS1   | SOX2 regulated genes from PMID: 20726797 | SOX2 |
| 2857 DEFB1   | SOX2 regulated genes from PMID: 20726797 | SOX2 |
| 2858 ADRA2A  | SOX2 regulated genes from PMID: 20726797 | SOX2 |
| 2859 RGS2    | SOX2 regulated genes from PMID: 20726797 | SOX2 |
| 2860 ITPR3   | SOX2 regulated genes from PMID: 20726797 | SOX2 |
| 2861 RBP4    | SOX2 regulated genes from PMID: 20726797 | SOX2 |
| 2862 HSD17B2 | SOX2 regulated genes from PMID: 20726797 | SOX2 |
| 2863 RXRA    | SOX2 regulated genes from PMID: 20726797 | SOX2 |
| 2864 AQP3    | SOX2 regulated genes from PMID: 20726797 | SOX2 |
| 2865 RARA    | SOX2 regulated genes from PMID: 20726797 | SOX2 |

|                    |                                                      |      |
|--------------------|------------------------------------------------------|------|
| 2866 TRIM16        | SOX2 regulated genes from PMID: 20726797             | SOX2 |
| 2867 ELF1          | SOX2 regulated genes in Wounding from PMID: 30772301 | SOX2 |
| 2868 FLRT3         | SOX2 regulated genes in Wounding from PMID: 30772301 | SOX2 |
| 2869 SUV39H2       | SOX2 regulated genes in Wounding from PMID: 30772301 | SOX2 |
| 2870 PSTPIP2       | SOX2 regulated genes in Wounding from PMID: 30772301 | SOX2 |
| 2871 TTC39B        | SOX2 regulated genes in Wounding from PMID: 30772301 | SOX2 |
| 2872 EXOC5         | SOX2 regulated genes in Wounding from PMID: 30772301 | SOX2 |
| 2873 SLITRK4       | SOX2 regulated genes in Wounding from PMID: 30772301 | SOX2 |
| 2874 TFAP2C        | SOX2 regulated genes in Wounding from PMID: 30772301 | SOX2 |
| 2875 AHCY          | SOX2 regulated genes in Wounding from PMID: 30772301 | SOX2 |
| 2876 OSBP2         | SOX2 regulated genes in Wounding from PMID: 30772301 | SOX2 |
| 2877 IL13RA1       | SOX2 regulated genes in Wounding from PMID: 30772301 | SOX2 |
| 2878 ADGRA3        | SOX2 regulated genes in Wounding from PMID: 30772301 | SOX2 |
| 2879 PBDC1         | SOX2 regulated genes in Wounding from PMID: 30772301 | SOX2 |
| 2880 SMOX          | SOX2 regulated genes in Wounding from PMID: 30772301 | SOX2 |
| 2881 TCEAL5        | SOX2 regulated genes in Wounding from PMID: 30772301 | SOX2 |
| 2882 FBXO7         | SOX2 regulated genes in Wounding from PMID: 30772301 | SOX2 |
| 2883 SLC39A6       | SOX2 regulated genes in Wounding from PMID: 30772301 | SOX2 |
| 2884 YES1          | SOX2 regulated genes in Wounding from PMID: 30772301 | SOX2 |
| 2885 RGS6          | SOX2 regulated genes in Wounding from PMID: 30772301 | SOX2 |
| 2886 TMEM50B       | SOX2 regulated genes in Wounding from PMID: 30772301 | SOX2 |
| 2887 GAREM1        | SOX2 regulated genes in Wounding from PMID: 30772301 | SOX2 |
| 2888 SLC37A1       | SOX2 regulated genes in Wounding from PMID: 30772301 | SOX2 |
| 2889 FAM3B         | SOX2 regulated genes in Wounding from PMID: 30772301 | SOX2 |
| 2890 CCT8          | SOX2 regulated genes in Wounding from PMID: 30772301 | SOX2 |
| 2891 ASCC2         | SOX2 regulated genes in Wounding from PMID: 30772301 | SOX2 |
| 2892 TPTEP2-CSNK1E | SOX2 regulated genes in Wounding from PMID: 30772301 | SOX2 |
| 2893 CSNK1E        | SOX2 regulated genes in Wounding from PMID: 30772301 | SOX2 |
| 2894 KLF6          | SOX2 regulated genes in Wounding from PMID: 30772301 | SOX2 |
| 2895 BTG3          | SOX2 regulated genes in Wounding from PMID: 30772301 | SOX2 |
| 2896 LURAP1L       | SOX2 regulated genes in Wounding from PMID: 30772301 | SOX2 |
| 2897 DSG3          | SOX2 regulated genes in Wounding from PMID: 30772301 | SOX2 |
| 2898 MAFF          | SOX2 regulated genes in Wounding from PMID: 30772301 | SOX2 |
| 2899 HSPA13        | SOX2 regulated genes in Wounding from PMID: 30772301 | SOX2 |
| 2900 WDR1          | SOX2 regulated genes in Wounding from PMID: 30772301 | SOX2 |
| 2901 PSPC1         | SOX2 regulated genes in Wounding from PMID: 30772301 | SOX2 |
| 2902 RAE1          | SOX2 regulated genes in Wounding from PMID: 30772301 | SOX2 |
| 2903 EIF2S2        | SOX2 regulated genes in Wounding from PMID: 30772301 | SOX2 |
| 2904 GTPBP6        | SOX2 regulated genes in Wounding from PMID: 30772301 | SOX2 |
| 2905 PRELID3B      | SOX2 regulated genes in Wounding from PMID: 30772301 | SOX2 |
| 2906 UNC79         | SOX2 regulated genes in Wounding from PMID: 30772301 | SOX2 |
| 2907 ZBTB7C        | SOX2 regulated genes in Wounding from PMID: 30772301 | SOX2 |
| 2908 LTBP2         | SOX2 regulated genes in Wounding from PMID: 30772301 | SOX2 |
| 2909 DEPDC5        | SOX2 regulated genes in Wounding from PMID: 30772301 | SOX2 |
| 2910 TMEM30B       | SOX2 regulated genes in Wounding from PMID: 30772301 | SOX2 |
| 2911 PCSK2         | SOX2 regulated genes in Wounding from PMID: 30772301 | SOX2 |
| 2912 NUDT11        | SOX2 regulated genes in Wounding from PMID: 30772301 | SOX2 |
| 2913 BRWD1         | SOX2 regulated genes in Wounding from PMID: 30772301 | SOX2 |
| 2914 BTBD7         | SOX2 regulated genes in Wounding from PMID: 30772301 | SOX2 |
| 2915 DSTN          | SOX2 regulated genes in Wounding from PMID: 30772301 | SOX2 |
| 2916 SAMD10        | SOX2 regulated genes in Wounding from PMID: 30772301 | SOX2 |
| 2917 XKRX          | SOX2 regulated genes in Wounding from PMID: 30772301 | SOX2 |
| 2918 MTCL1         | SOX2 regulated genes in Wounding from PMID: 30772301 | SOX2 |
| 2919 NAA30         | SOX2 regulated genes in Wounding from PMID: 30772301 | SOX2 |
| 2920 SCEL          | SOX2 regulated genes in Wounding from PMID: 30772301 | SOX2 |
| 2921 RRP1          | SOX2 regulated genes in Wounding from PMID: 30772301 | SOX2 |
| 2922 CCDC85C       | SOX2 regulated genes in Wounding from PMID: 30772301 | SOX2 |
| 2923 RNF152        | SOX2 regulated genes in Wounding from PMID: 30772301 | SOX2 |
| 2924 CLDN14        | SOX2 regulated genes in Wounding from PMID: 30772301 | SOX2 |
| 2925 PLEKHD1       | SOX2 regulated genes in Wounding from PMID: 30772301 | SOX2 |
| 2926 OSM           | SOX2 regulated genes in Wounding from PMID: 30772301 | SOX2 |

|                |                                                      |      |
|----------------|------------------------------------------------------|------|
| 2927 RNF17     | SOX2 regulated genes in Wounding from PMID: 30772301 | SOX2 |
| 2928 TMEM33    | SOX2 regulated genes in Wounding from PMID: 30772301 | SOX2 |
| 2929 TRMT5     | SOX2 regulated genes in Wounding from PMID: 30772301 | SOX2 |
| 2930 BMP2      | SOX2 regulated genes in Wounding from PMID: 30772301 | SOX2 |
| 2931 SRSF5     | SOX2 regulated genes in Wounding from PMID: 30772301 | SOX2 |
| 2932 LHFPL1    | SOX2 regulated genes in Wounding from PMID: 30772301 | SOX2 |
| 2933 CDKN2B    | SOX2 regulated genes in Wounding from PMID: 30772301 | SOX2 |
| 2934 TXNL1     | SOX2 regulated genes in Wounding from PMID: 30772301 | SOX2 |
| 2935 DHX15     | SOX2 regulated genes in Wounding from PMID: 30772301 | SOX2 |
| 2936 POF1B     | SOX2 regulated genes in Wounding from PMID: 30772301 | SOX2 |
| 2937 NDP       | SOX2 regulated genes in Wounding from PMID: 30772301 | SOX2 |
| 2938 MTAP      | SOX2 regulated genes in Wounding from PMID: 30772301 | SOX2 |
| 2939 RIPK4     | SOX2 regulated genes in Wounding from PMID: 30772301 | SOX2 |
| 2940 EFNB1     | SOX2 regulated genes in Wounding from PMID: 30772301 | SOX2 |
| 2941 ACAA2     | SOX2 regulated genes in Wounding from PMID: 30772301 | SOX2 |
| 2942 PDE9A     | SOX2 regulated genes in Wounding from PMID: 30772301 | SOX2 |
| 2943 LIMK2     | SOX2 regulated genes in Wounding from PMID: 30772301 | SOX2 |
| 2944 CTIF      | SOX2 regulated genes in Wounding from PMID: 30772301 | SOX2 |
| 2945 SYNGR1    | SOX2 regulated genes in Wounding from PMID: 30772301 | SOX2 |
| 2946 PMEPA1    | SOX2 regulated genes in Wounding from PMID: 30772301 | SOX2 |
| 2947 HSPH1     | SOX2 regulated genes in Wounding from PMID: 30772301 | SOX2 |
| 2948 USP16     | SOX2 regulated genes in Wounding from PMID: 30772301 | SOX2 |
| 2949 C21orf91  | SOX2 regulated genes in Wounding from PMID: 30772301 | SOX2 |
| 2950 RAB27B    | SOX2 regulated genes in Wounding from PMID: 30772301 | SOX2 |
| 2951 CORIN     | SOX2 regulated genes in Wounding from PMID: 30772301 | SOX2 |
| 2952 EIF4ENIF1 | SOX2 regulated genes in Wounding from PMID: 30772301 | SOX2 |
| 2953 TGIF1     | SOX2 regulated genes in Wounding from PMID: 30772301 | SOX2 |
| 2954 MYO5B     | SOX2 regulated genes in Wounding from PMID: 30772301 | SOX2 |
| 2955 SLAIN1    | SOX2 regulated genes in Wounding from PMID: 30772301 | SOX2 |
| 2956 MSX1      | SOX2 regulated genes in Wounding from PMID: 30772301 | SOX2 |
| 2957 GTF2F2    | SOX2 regulated genes in Wounding from PMID: 30772301 | SOX2 |
| 2958 JAG1      | SOX2 regulated genes in Wounding from PMID: 30772301 | SOX2 |
| 2959 SLC25A17  | SOX2 regulated genes in Wounding from PMID: 30772301 | SOX2 |
| 2960 CDKL5     | SOX2 regulated genes in Wounding from PMID: 30772301 | SOX2 |
| 2961 BRWD3     | SOX2 regulated genes in Wounding from PMID: 30772301 | SOX2 |
| 2962 SMAD2     | SOX2 regulated genes in Wounding from PMID: 30772301 | SOX2 |
| 2963 TEC       | SOX2 regulated genes in Wounding from PMID: 30772301 | SOX2 |
| 2964 HOPX      | SOX2 regulated genes in Wounding from PMID: 30772301 | SOX2 |
| 2965 SDC4      | SOX2 regulated genes in Wounding from PMID: 30772301 | SOX2 |
| 2966 ATRN      | SOX2 regulated genes in Wounding from PMID: 30772301 | SOX2 |
| 2967 COL18A1   | SOX2 regulated genes in Wounding from PMID: 30772301 | SOX2 |
| 2968 PLA2G3    | SOX2 regulated genes in Wounding from PMID: 30772301 | SOX2 |
| 2969 ETS2      | SOX2 regulated genes in Wounding from PMID: 30772301 | SOX2 |
| 2970 TBC1D25   | SOX2 regulated genes in Wounding from PMID: 30772301 | SOX2 |
| 2971 DSG4      | SOX2 regulated genes in Wounding from PMID: 30772301 | SOX2 |
| 2972 CCDC68    | SOX2 regulated genes in Wounding from PMID: 30772301 | SOX2 |
| 2973 RUNX1     | SOX2 regulated genes in Wounding from PMID: 30772301 | SOX2 |
| 2974 S100G     | SOX2 regulated genes in Wounding from PMID: 30772301 | SOX2 |
| 2975 EYA2      | SOX2 regulated genes in Wounding from PMID: 30772301 | SOX2 |
| 2976 CPLX1     | SOX2 regulated genes in Wounding from PMID: 30772301 | SOX2 |
| 2977 JADE3     | SOX2 regulated genes in Wounding from PMID: 30772301 | SOX2 |
| 2978 RNF4      | SOX2 regulated genes in Wounding from PMID: 30772301 | SOX2 |
| 2979 MORC4     | SOX2 regulated genes in Wounding from PMID: 30772301 | SOX2 |
| 2980 SYCP2     | SOX2 regulated genes in Wounding from PMID: 30772301 | SOX2 |
| 2981 PPP2R5E   | SOX2 regulated genes in Wounding from PMID: 30772301 | SOX2 |
| 2982 RBBP8NL   | SOX2 regulated genes in Wounding from PMID: 30772301 | SOX2 |
| 2983 CSTB      | SOX2 regulated genes in Wounding from PMID: 30772301 | SOX2 |
| 2984 TP53INP2  | SOX2 regulated genes in Wounding from PMID: 30772301 | SOX2 |
| 2985 BMP7      | SOX2 regulated genes in Wounding from PMID: 30772301 | SOX2 |
| 2986 CLDN8     | SOX2 regulated genes in Wounding from PMID: 30772301 | SOX2 |
| 2987 RPRD1A    | SOX2 regulated genes in Wounding from PMID: 30772301 | SOX2 |

|                |                                                      |      |
|----------------|------------------------------------------------------|------|
| 2988 ATP9A     | SOX2 regulated genes in Wounding from PMID: 30772301 | SOX2 |
| 2989 SYN3      | SOX2 regulated genes in Wounding from PMID: 30772301 | SOX2 |
| 2990 PCGF3     | SOX2 regulated genes in Wounding from PMID: 30772301 | SOX2 |
| 2991 SEC23B    | SOX2 regulated genes in Wounding from PMID: 30772301 | SOX2 |
| 2992 PCBP3     | SOX2 regulated genes in Wounding from PMID: 30772301 | SOX2 |
| 2993 PCNX4     | SOX2 regulated genes in Wounding from PMID: 30772301 | SOX2 |
| 2994 PDRG1     | SOX2 regulated genes in Wounding from PMID: 30772301 | SOX2 |
| 2995 RGP1      | SOX2 regulated genes in Wounding from PMID: 30772301 | SOX2 |
| 2996 OSBPL3    | SOX2 regulated genes in Wounding from PMID: 30772301 | SOX2 |
| 2997 PTPN3     | SOX2 regulated genes in Wounding from PMID: 30772301 | SOX2 |
| 2998 DNASE1L2  | SOX2 regulated genes in Wounding from PMID: 30772301 | SOX2 |
| 2999 TNFRSF13C | SOX2 regulated genes in Wounding from PMID: 30772301 | SOX2 |
| 3000 RNPS1     | SOX2 regulated genes in Wounding from PMID: 30772301 | SOX2 |
| 3001 SPEF1     | SOX2 regulated genes in Wounding from PMID: 30772301 | SOX2 |
| 3002 RASL10A   | SOX2 regulated genes in Wounding from PMID: 30772301 | SOX2 |
| 3003 OSER1     | SOX2 regulated genes in Wounding from PMID: 30772301 | SOX2 |
| 3004 TES       | SOX2 regulated genes in Wounding from PMID: 30772301 | SOX2 |
| 3005 SPIDR     | SOX2 regulated genes in Wounding from PMID: 30772301 | SOX2 |
| 3006 CAGE1     | SOX2 regulated genes in Wounding from PMID: 30772301 | SOX2 |
| 3007 PNP       | SOX2 regulated genes in Wounding from PMID: 30772301 | SOX2 |
| 3008 ARID3A    | SOX2 regulated genes in Wounding from PMID: 30772301 | SOX2 |
| 3009 BNIP3L    | SOX2 regulated genes in Wounding from PMID: 30772301 | SOX2 |
| 3010 CSPG4     | SOX2 regulated genes in Wounding from PMID: 30772301 | SOX2 |
| 3011 PRRG4     | SOX2 regulated genes in Wounding from PMID: 30772301 | SOX2 |
| 3012 PDAP1     | SOX2 regulated genes in Wounding from PMID: 30772301 | SOX2 |
| 3013 CELSR1    | SOX2 regulated genes in Wounding from PMID: 30772301 | SOX2 |
| 3014 PJA1      | SOX2 regulated genes in Wounding from PMID: 30772301 | SOX2 |
| 3015 COL4A5    | SOX2 regulated genes in Wounding from PMID: 30772301 | SOX2 |
| 3016 AIMP2     | SOX2 regulated genes in Wounding from PMID: 30772301 | SOX2 |
| 3017 DUSP9     | SOX2 regulated genes in Wounding from PMID: 30772301 | SOX2 |
| 3018 MICALL2   | SOX2 regulated genes in Wounding from PMID: 30772301 | SOX2 |
| 3019 FRYL      | SOX2 regulated genes in Wounding from PMID: 30772301 | SOX2 |
| 3020 CD2AP     | SOX2 regulated genes in Wounding from PMID: 30772301 | SOX2 |
| 3021 ITGA5     | SOX2 regulated genes in Wounding from PMID: 30772301 | SOX2 |
| 3022 C8orf48   | SOX2 regulated genes in Wounding from PMID: 30772301 | SOX2 |
| 3023 GSDMA     | SOX2 regulated genes in Wounding from PMID: 30772301 | SOX2 |
| 3024 BBOX1     | SOX2 regulated genes in Wounding from PMID: 30772301 | SOX2 |
| 3025 ANKRD50   | SOX2 regulated genes in Wounding from PMID: 30772301 | SOX2 |
| 3026 PARM1     | SOX2 regulated genes in Wounding from PMID: 30772301 | SOX2 |
| 3027 SMTN      | SOX2 regulated genes in Wounding from PMID: 30772301 | SOX2 |
| 3028 PAR6B     | SOX2 regulated genes in Wounding from PMID: 30772301 | SOX2 |
| 3029 SLC39A2   | SOX2 regulated genes in Wounding from PMID: 30772301 | SOX2 |
| 3030 TIAM1     | SOX2 regulated genes in Wounding from PMID: 30772301 | SOX2 |
| 3031 TAX1BP3   | SOX2 regulated genes in Wounding from PMID: 30772301 | SOX2 |
| 3032 RBM12     | SOX2 regulated genes in Wounding from PMID: 30772301 | SOX2 |
| 3033 QSOX2     | SOX2 regulated genes in Wounding from PMID: 30772301 | SOX2 |
| 3034 STAR      | SOX2 regulated genes in Wounding from PMID: 30772301 | SOX2 |
| 3035 JHY       | SOX2 regulated genes in Wounding from PMID: 30772301 | SOX2 |
| 3036 CSNK2A3   | SOX2 regulated genes in Wounding from PMID: 30772301 | SOX2 |
| 3037 CSNK2A1   | SOX2 regulated genes in Wounding from PMID: 30772301 | SOX2 |
| 3038 TADA2B    | SOX2 regulated genes in Wounding from PMID: 30772301 | SOX2 |
| 3039 CTBP2     | SOX2 regulated genes in Wounding from PMID: 30772301 | SOX2 |
| 3040 SLC38A2   | SOX2 regulated genes in Wounding from PMID: 30772301 | SOX2 |
| 3041 CARMIL1   | SOX2 regulated genes in Wounding from PMID: 30772301 | SOX2 |
| 3042 FAM83G    | SOX2 regulated genes in Wounding from PMID: 30772301 | SOX2 |
| 3043 LMX1B     | SOX2 regulated genes in Wounding from PMID: 30772301 | SOX2 |
| 3044 LAMA1     | SOX2 regulated genes in Wounding from PMID: 30772301 | SOX2 |
| 3045 GLS2      | SOX2 regulated genes in Wounding from PMID: 30772301 | SOX2 |
| 3046 NUP58     | SOX2 regulated genes in Wounding from PMID: 30772301 | SOX2 |
| 3047 GCOM1     | SOX2 regulated genes in Wounding from PMID: 30772301 | SOX2 |
| 3048 SERPINA3  | SOX2 regulated genes in Wounding from PMID: 30772301 | SOX2 |

|               |                                                      |      |
|---------------|------------------------------------------------------|------|
| 3049 AMOTL1   | SOX2 regulated genes in Wounding from PMID: 30772301 | SOX2 |
| 3050 PIP5K1B  | SOX2 regulated genes in Wounding from PMID: 30772301 | SOX2 |
| 3051 DSC2     | SOX2 regulated genes in Wounding from PMID: 30772301 | SOX2 |
| 3052 PTPN13   | SOX2 regulated genes in Wounding from PMID: 30772301 | SOX2 |
| 3053 THNSL1   | SOX2 regulated genes in Wounding from PMID: 30772301 | SOX2 |
| 3054 ORMDL3   | SOX2 regulated genes in Wounding from PMID: 30772301 | SOX2 |
| 3055 GJA1     | SOX2 regulated genes in Wounding from PMID: 30772301 | SOX2 |
| 3056 CASK     | SOX2 regulated genes in Wounding from PMID: 30772301 | SOX2 |
| 3057 NCBP1    | SOX2 regulated genes in Wounding from PMID: 30772301 | SOX2 |
| 3058 HNRNPK   | SOX2 regulated genes in Wounding from PMID: 30772301 | SOX2 |
| 3059 DIO3     | SOX2 regulated genes in Wounding from PMID: 30772301 | SOX2 |
| 3060 PPIL1    | SOX2 regulated genes in Wounding from PMID: 30772301 | SOX2 |
| 3061 TLE1     | SOX2 regulated genes in Wounding from PMID: 30772301 | SOX2 |
| 3062 DLGAP4   | SOX2 regulated genes in Wounding from PMID: 30772301 | SOX2 |
| 3063 CYB5R4   | SOX2 regulated genes in Wounding from PMID: 30772301 | SOX2 |
| 3064 TBX1     | SOX2 regulated genes in Wounding from PMID: 30772301 | SOX2 |
| 3065 RRGTT    | SOX2 regulated genes in Wounding from PMID: 30772301 | SOX2 |
| 3066 MYO1D    | SOX2 regulated genes in Wounding from PMID: 30772301 | SOX2 |
| 3067 FMN1     | SOX2 regulated genes in Wounding from PMID: 30772301 | SOX2 |
| 3068 POLR2M   | SOX2 regulated genes in Wounding from PMID: 30772301 | SOX2 |
| 3069 EIF2B2   | SOX2 regulated genes in Wounding from PMID: 30772301 | SOX2 |
| 3070 ABHD13   | SOX2 regulated genes in Wounding from PMID: 30772301 | SOX2 |
| 3071 ARHGEF17 | SOX2 regulated genes in Wounding from PMID: 30772301 | SOX2 |
| 3072 CCT6A    | SOX2 regulated genes in Wounding from PMID: 30772301 | SOX2 |
| 3073 SMARCA5  | SOX2 regulated genes in Wounding from PMID: 30772301 | SOX2 |
| 3074 SPIRE1   | SOX2 regulated genes in Wounding from PMID: 30772301 | SOX2 |
| 3075 DCLK2    | SOX2 regulated genes in Wounding from PMID: 30772301 | SOX2 |
| 3076 PRAG1    | SOX2 regulated genes in Wounding from PMID: 30772301 | SOX2 |
| 3077 APLN     | SOX2 regulated genes in Wounding from PMID: 30772301 | SOX2 |
| 3078 GGT1     | SOX2 regulated genes in Wounding from PMID: 30772301 | SOX2 |
| 3079 NEDD9    | SOX2 regulated genes in Wounding from PMID: 30772301 | SOX2 |
| 3080 ERI1     | SOX2 regulated genes in Wounding from PMID: 30772301 | SOX2 |
| 3081 PFN1     | SOX2 regulated genes in Wounding from PMID: 30772301 | SOX2 |
| 3082 PGAP3    | SOX2 regulated genes in Wounding from PMID: 30772301 | SOX2 |
| 3083 BCR      | SOX2 regulated genes in Wounding from PMID: 30772301 | SOX2 |
| 3084 ATP12A   | SOX2 regulated genes in Wounding from PMID: 30772301 | SOX2 |
| 3085 PROCR    | SOX2 regulated genes in Wounding from PMID: 30772301 | SOX2 |
| 3086 SEMA7A   | SOX2 regulated genes in Wounding from PMID: 30772301 | SOX2 |
| 3087 EFN2     | SOX2 regulated genes in Wounding from PMID: 30772301 | SOX2 |
| 3088 TMEM154  | SOX2 regulated genes in Wounding from PMID: 30772301 | SOX2 |
| 3089 ANXA1    | SOX2 regulated genes in Wounding from PMID: 30772301 | SOX2 |
| 3090 SRSF6    | SOX2 regulated genes in Wounding from PMID: 30772301 | SOX2 |
| 3091 ARHGDI3  | SOX2 regulated genes in Wounding from PMID: 30772301 | SOX2 |
| 3092 FOXQ1    | SOX2 regulated genes in Wounding from PMID: 30772301 | SOX2 |
| 3093 MBOAT1   | SOX2 regulated genes in Wounding from PMID: 30772301 | SOX2 |
| 3094 GSPT1    | SOX2 regulated genes in Wounding from PMID: 30772301 | SOX2 |
| 3095 GPR180   | SOX2 regulated genes in Wounding from PMID: 30772301 | SOX2 |
| 3096 TMEM98   | SOX2 regulated genes in Wounding from PMID: 30772301 | SOX2 |
| 3097 LRRC75B  | SOX2 regulated genes in Wounding from PMID: 30772301 | SOX2 |
| 3098 LPIN3    | SOX2 regulated genes in Wounding from PMID: 30772301 | SOX2 |
| 3099 ATP6V1E1 | SOX2 regulated genes in Wounding from PMID: 30772301 | SOX2 |
| 3100 TMPRSS2  | SOX2 regulated genes in Wounding from PMID: 30772301 | SOX2 |
| 3101 ABRACL   | SOX2 regulated genes in Wounding from PMID: 30772301 | SOX2 |
| 3102 ITPRIIP  | SOX2 regulated genes in Wounding from PMID: 30772301 | SOX2 |
| 3103 CPNE8    | SOX2 regulated genes in Wounding from PMID: 30772301 | SOX2 |
| 3104 EBPL     | SOX2 regulated genes in Wounding from PMID: 30772301 | SOX2 |
| 3105 MYO10    | SOX2 regulated genes in Wounding from PMID: 30772301 | SOX2 |
| 3106 SPIN1    | SOX2 regulated genes in Wounding from PMID: 30772301 | SOX2 |
| 3107 SCML4    | SOX2 regulated genes in Wounding from PMID: 30772301 | SOX2 |
| 3108 PARD6G   | SOX2 regulated genes in Wounding from PMID: 30772301 | SOX2 |
| 3109 CDC6     | SOX2 regulated genes in Wounding from PMID: 30772301 | SOX2 |

|                |                                                      |      |
|----------------|------------------------------------------------------|------|
| 3110 TBC1D2    | SOX2 regulated genes in Wounding from PMID: 30772301 | SOX2 |
| 3111 CDKL2     | SOX2 regulated genes in Wounding from PMID: 30772301 | SOX2 |
| 3112 HIRA      | SOX2 regulated genes in Wounding from PMID: 30772301 | SOX2 |
| 3113 CNN2      | SOX2 regulated genes in Wounding from PMID: 30772301 | SOX2 |
| 3114 GATAD1    | SOX2 regulated genes in Wounding from PMID: 30772301 | SOX2 |
| 3115 PORCN     | SOX2 regulated genes in Wounding from PMID: 30772301 | SOX2 |
| 3116 SENP6     | SOX2 regulated genes in Wounding from PMID: 30772301 | SOX2 |
| 3117 DIS3      | SOX2 regulated genes in Wounding from PMID: 30772301 | SOX2 |
| 3118 HBS1L     | SOX2 regulated genes in Wounding from PMID: 30772301 | SOX2 |
| 3119 HSBP1L1   | SOX2 regulated genes in Wounding from PMID: 30772301 | SOX2 |
| 3120 CXXC4     | SOX2 regulated genes in Wounding from PMID: 30772301 | SOX2 |
| 3121 CREB3     | SOX2 regulated genes in Wounding from PMID: 30772301 | SOX2 |
| 3122 FEM1B     | SOX2 regulated genes in Wounding from PMID: 30772301 | SOX2 |
| 3123 STRAP     | SOX2 regulated genes in Wounding from PMID: 30772301 | SOX2 |
| 3124 TADA2A    | SOX2 regulated genes in Wounding from PMID: 30772301 | SOX2 |
| 3125 ITPR3     | SOX2 regulated genes in Wounding from PMID: 30772301 | SOX2 |
| 3126 MYBL2     | SOX2 regulated genes in Wounding from PMID: 30772301 | SOX2 |
| 3127 SYT7      | SOX2 regulated genes in Wounding from PMID: 30772301 | SOX2 |
| 3128 PLXNA3    | SOX2 regulated genes in Wounding from PMID: 30772301 | SOX2 |
| 3129 FAM20C    | SOX2 regulated genes in Wounding from PMID: 30772301 | SOX2 |
| 3130 SEC14L2   | SOX2 regulated genes in Wounding from PMID: 30772301 | SOX2 |
| 3131 RWDD4     | SOX2 regulated genes in Wounding from PMID: 30772301 | SOX2 |
| 3132 BICD2     | SOX2 regulated genes in Wounding from PMID: 30772301 | SOX2 |
| 3133 HSP90AA1  | SOX2 regulated genes in Wounding from PMID: 30772301 | SOX2 |
| 3134 FARP1     | SOX2 regulated genes in Wounding from PMID: 30772301 | SOX2 |
| 3135 KREMEN1   | SOX2 regulated genes in Wounding from PMID: 30772301 | SOX2 |
| 3136 SMAP1     | SOX2 regulated genes in Wounding from PMID: 30772301 | SOX2 |
| 3137 CAAP1     | SOX2 regulated genes in Wounding from PMID: 30772301 | SOX2 |
| 3138 MMP9      | SOX2 regulated genes in Wounding from PMID: 30772301 | SOX2 |
| 3139 RHOV      | SOX2 regulated genes in Wounding from PMID: 30772301 | SOX2 |
| 3140 THBS1     | SOX2 regulated genes in Wounding from PMID: 30772301 | SOX2 |
| 3141 FANCF     | SOX2 regulated genes in Wounding from PMID: 30772301 | SOX2 |
| 3142 PCDH19    | SOX2 regulated genes in Wounding from PMID: 30772301 | SOX2 |
| 3143 BDKRB1    | SOX2 regulated genes in Wounding from PMID: 30772301 | SOX2 |
| 3144 COG6      | SOX2 regulated genes in Wounding from PMID: 30772301 | SOX2 |
| 3145 PAWR      | SOX2 regulated genes in Wounding from PMID: 30772301 | SOX2 |
| 3146 DUSP14    | SOX2 regulated genes in Wounding from PMID: 30772301 | SOX2 |
| 3147 NCKAP5L   | SOX2 regulated genes in Wounding from PMID: 30772301 | SOX2 |
| 3148 GP1BB     | SOX2 regulated genes in Wounding from PMID: 30772301 | SOX2 |
| 3149 CCDC120   | SOX2 regulated genes in Wounding from PMID: 30772301 | SOX2 |
| 3150 HSP90AB1  | SOX2 regulated genes in Wounding from PMID: 30772301 | SOX2 |
| 3151 CCDC25    | SOX2 regulated genes in Wounding from PMID: 30772301 | SOX2 |
| 3152 SEC63     | SOX2 regulated genes in Wounding from PMID: 30772301 | SOX2 |
| 3153 CCDC116   | SOX2 regulated genes in Wounding from PMID: 30772301 | SOX2 |
| 3154 ENTPD7    | SOX2 regulated genes in Wounding from PMID: 30772301 | SOX2 |
| 3155 LNX1      | SOX2 regulated genes in Wounding from PMID: 30772301 | SOX2 |
| 3156 SMAD7     | SOX2 regulated genes in Wounding from PMID: 30772301 | SOX2 |
| 3157 ACE2      | SOX2 regulated genes in Wounding from PMID: 30772301 | SOX2 |
| 3158 ARID2     | SOX2 regulated genes in Wounding from PMID: 30772301 | SOX2 |
| 3159 ARHGAP24  | SOX2 regulated genes in Wounding from PMID: 30772301 | SOX2 |
| 3160 DEPDC7    | SOX2 regulated genes in Wounding from PMID: 30772301 | SOX2 |
| 3161 CLNS1A    | SOX2 regulated genes in Wounding from PMID: 30772301 | SOX2 |
| 3162 GSTCD     | SOX2 regulated genes in Wounding from PMID: 30772301 | SOX2 |
| 3163 DERA      | SOX2 regulated genes in Wounding from PMID: 30772301 | SOX2 |
| 3164 PRICKLE1  | SOX2 regulated genes in Wounding from PMID: 30772301 | SOX2 |
| 3165 CAMSAP1   | SOX2 regulated genes in Wounding from PMID: 30772301 | SOX2 |
| 3166 RERG      | SOX2 regulated genes in Wounding from PMID: 30772301 | SOX2 |
| 3167 GFOD1     | SOX2 regulated genes in Wounding from PMID: 30772301 | SOX2 |
| 3168 TMPRSS11E | SOX2 regulated genes in Wounding from PMID: 30772301 | SOX2 |
| 3169 MORC2     | SOX2 regulated genes in Wounding from PMID: 30772301 | SOX2 |
| 3170 NIPSNAP1  | SOX2 regulated genes in Wounding from PMID: 30772301 | SOX2 |

|                |                                                      |      |
|----------------|------------------------------------------------------|------|
| 3171 GMEB2     | SOX2 regulated genes in Wounding from PMID: 30772301 | SOX2 |
| 3172 FOXE1     | SOX2 regulated genes in Wounding from PMID: 30772301 | SOX2 |
| 3173 RUNX2     | SOX2 regulated genes in Wounding from PMID: 30772301 | SOX2 |
| 3174 C10orf88  | SOX2 regulated genes in Wounding from PMID: 30772301 | SOX2 |
| 3175 DPH6      | SOX2 regulated genes in Wounding from PMID: 30772301 | SOX2 |
| 3176 TBC1D10A  | SOX2 regulated genes in Wounding from PMID: 30772301 | SOX2 |
| 3177 RFLNB     | SOX2 regulated genes in Wounding from PMID: 30772301 | SOX2 |
| 3178 MINPP1    | SOX2 regulated genes in Wounding from PMID: 30772301 | SOX2 |
| 3179 CD109     | SOX2 regulated genes in Wounding from PMID: 30772301 | SOX2 |
| 3180 MTRR      | SOX2 regulated genes in Wounding from PMID: 30772301 | SOX2 |
| 3181 NXN       | SOX2 regulated genes in Wounding from PMID: 30772301 | SOX2 |
| 3182 SMOC1     | SOX2 regulated genes in Wounding from PMID: 30772301 | SOX2 |
| 3183 TCF7L2    | SOX2 regulated genes in Wounding from PMID: 30772301 | SOX2 |
| 3184 CRELD2    | SOX2 regulated genes in Wounding from PMID: 30772301 | SOX2 |
| 3185 ATP6V1B2  | SOX2 regulated genes in Wounding from PMID: 30772301 | SOX2 |
| 3186 CISD2     | SOX2 regulated genes in Wounding from PMID: 30772301 | SOX2 |
| 3187 TMPRSS11F | SOX2 regulated genes in Wounding from PMID: 30772301 | SOX2 |
| 3188 GCLC      | SOX2 regulated genes in Wounding from PMID: 30772301 | SOX2 |
| 3189 SPATA18   | SOX2 regulated genes in Wounding from PMID: 30772301 | SOX2 |
| 3190 GBA2      | SOX2 regulated genes in Wounding from PMID: 30772301 | SOX2 |
| 3191 CPXM2     | SOX2 regulated genes in Wounding from PMID: 30772301 | SOX2 |
| 3192 RNF182    | SOX2 regulated genes in Wounding from PMID: 30772301 | SOX2 |
| 3193 CDK5R1    | SOX2 regulated genes in Wounding from PMID: 30772301 | SOX2 |
| 3194 AFAP1L2   | SOX2 regulated genes in Wounding from PMID: 30772301 | SOX2 |
| 3195 PDLIM1    | SOX2 regulated genes in Wounding from PMID: 30772301 | SOX2 |
| 3196 HDAC2     | SOX2 regulated genes in Wounding from PMID: 30772301 | SOX2 |
| 3197 KCNE1     | SOX2 regulated genes in Wounding from PMID: 30772301 | SOX2 |
| 3198 RCN2      | SOX2 regulated genes in Wounding from PMID: 30772301 | SOX2 |
| 3199 PRSS12    | SOX2 regulated genes in Wounding from PMID: 30772301 | SOX2 |
| 3200 CLU       | SOX2 regulated genes in Wounding from PMID: 30772301 | SOX2 |
| 3201 MICAL3    | SOX2 regulated genes in Wounding from PMID: 30772301 | SOX2 |
| 3202 CYP39A1   | SOX2 regulated genes in Wounding from PMID: 30772301 | SOX2 |
| 3203 SLC15A1   | SOX2 regulated genes in Wounding from PMID: 30772301 | SOX2 |
| 3204 SLC25A37  | SOX2 regulated genes in Wounding from PMID: 30772301 | SOX2 |
| 3205 SERPINB5  | SOX2 regulated genes in Wounding from PMID: 30772301 | SOX2 |
| 3206 SMAD6     | SOX2 regulated genes in Wounding from PMID: 30772301 | SOX2 |
| 3207 HDDC2     | SOX2 regulated genes in Wounding from PMID: 30772301 | SOX2 |
| 3208 PAQR8     | SOX2 regulated genes in Wounding from PMID: 30772301 | SOX2 |
| 3209 TCFL5     | SOX2 regulated genes in Wounding from PMID: 30772301 | SOX2 |
| 3210 HACE1     | SOX2 regulated genes in Wounding from PMID: 30772301 | SOX2 |
| 3211 LRAT      | SOX2 regulated genes in Wounding from PMID: 30772301 | SOX2 |
| 3212 CCDC169   | SOX2 regulated genes in Wounding from PMID: 30772301 | SOX2 |
| 3213 RASSF6    | SOX2 regulated genes in Wounding from PMID: 30772301 | SOX2 |
| 3214 ENTPD8    | SOX2 regulated genes in Wounding from PMID: 30772301 | SOX2 |
| 3215 STYK1     | SOX2 regulated genes in Wounding from PMID: 30772301 | SOX2 |
| 3216 RANGAP1   | SOX2 regulated genes in Wounding from PMID: 30772301 | SOX2 |
| 3217 DDX27     | SOX2 regulated genes in Wounding from PMID: 30772301 | SOX2 |
| 3218 PLCXD1    | SOX2 regulated genes in Wounding from PMID: 30772301 | SOX2 |
| 3219 SLC6A8    | SOX2 regulated genes in Wounding from PMID: 30772301 | SOX2 |
| 3220 SHROOM3   | SOX2 regulated genes in Wounding from PMID: 30772301 | SOX2 |
| 3221 RANBP1    | SOX2 regulated genes in Wounding from PMID: 30772301 | SOX2 |
| 3222 RIOK1     | SOX2 regulated genes in Wounding from PMID: 30772301 | SOX2 |
| 3223 FOXC1     | SOX2 regulated genes in Wounding from PMID: 30772301 | SOX2 |
| 3224 AK7       | SOX2 regulated genes in Wounding from PMID: 30772301 | SOX2 |
| 3225 CWH43     | SOX2 regulated genes in Wounding from PMID: 30772301 | SOX2 |
| 3226 PROSER2   | SOX2 regulated genes in Wounding from PMID: 30772301 | SOX2 |
| 3227 PALLD     | SOX2 regulated genes in Wounding from PMID: 30772301 | SOX2 |
| 3228 FAM83C    | SOX2 regulated genes in Wounding from PMID: 30772301 | SOX2 |
| 3229 TDRD3     | SOX2 regulated genes in Wounding from PMID: 30772301 | SOX2 |
| 3230 MAPK11    | SOX2 regulated genes in Wounding from PMID: 30772301 | SOX2 |
| 3231 LAMA3     | SOX2 regulated genes in Wounding from PMID: 30772301 | SOX2 |

|                |                                                      |      |
|----------------|------------------------------------------------------|------|
| 3232 AJUBA     | SOX2 regulated genes in Wounding from PMID: 30772301 | SOX2 |
| 3233 SERPINB13 | SOX2 regulated genes in Wounding from PMID: 30772301 | SOX2 |
| 3234 ABTB2     | SOX2 regulated genes in Wounding from PMID: 30772301 | SOX2 |
| 3235 DBNDD2    | SOX2 regulated genes in Wounding from PMID: 30772301 | SOX2 |
| 3236 TM9SF3    | SOX2 regulated genes in Wounding from PMID: 30772301 | SOX2 |
| 3237 MORF4L2   | SOX2 regulated genes in Wounding from PMID: 30772301 | SOX2 |
| 3238 MAPK1     | SOX2 regulated genes in Wounding from PMID: 30772301 | SOX2 |
| 3239 DLST      | SOX2 regulated genes in Wounding from PMID: 30772301 | SOX2 |
| 3240 SWI5      | SOX2 regulated genes in Wounding from PMID: 30772301 | SOX2 |
| 3241 MAGOHB    | SOX2 regulated genes in Wounding from PMID: 30772301 | SOX2 |
| 3242 RAD23B    | SOX2 regulated genes in Wounding from PMID: 30772301 | SOX2 |
| 3243 GPRIN3    | SOX2 regulated genes in Wounding from PMID: 30772301 | SOX2 |
| 3244 IRX4      | SOX2 regulated genes in Wounding from PMID: 30772301 | SOX2 |
| 3245 BMP6      | SOX2 regulated genes in Wounding from PMID: 30772301 | SOX2 |
| 3246 NAA35     | SOX2 regulated genes in Wounding from PMID: 30772301 | SOX2 |
| 3247 NUS1      | SOX2 regulated genes in Wounding from PMID: 30772301 | SOX2 |
| 3248 SUCLA2    | SOX2 regulated genes in Wounding from PMID: 30772301 | SOX2 |
| 3249 DSG2      | SOX2 regulated genes in Wounding from PMID: 30772301 | SOX2 |
| 3250 CPNE5     | SOX2 regulated genes in Wounding from PMID: 30772301 | SOX2 |
| 3251 CRK       | SOX2 regulated genes in Wounding from PMID: 30772301 | SOX2 |
| 3252 RCAN1     | SOX2 regulated genes in Wounding from PMID: 30772301 | SOX2 |
| 3253 FLNA      | SOX2 regulated genes in Wounding from PMID: 30772301 | SOX2 |
| 3254 FXJ1      | SOX2 regulated genes in Wounding from PMID: 30772301 | SOX2 |
| 3255 B4GALNT3  | SOX2 regulated genes in Wounding from PMID: 30772301 | SOX2 |
| 3256 CA12      | SOX2 regulated genes in Wounding from PMID: 30772301 | SOX2 |
| 3257 SNX12     | SOX2 regulated genes in Wounding from PMID: 30772301 | SOX2 |
| 3258 KCTD9     | SOX2 regulated genes in Wounding from PMID: 30772301 | SOX2 |
| 3259 MEOX1     | SOX2 regulated genes in Wounding from PMID: 30772301 | SOX2 |
| 3260 FERMT1    | SOX2 regulated genes in Wounding from PMID: 30772301 | SOX2 |
| 3261 EDN1      | SOX2 regulated genes in Wounding from PMID: 30772301 | SOX2 |
| 3262 PLP2      | SOX2 regulated genes in Wounding from PMID: 30772301 | SOX2 |
| 3263 FAM199X   | SOX2 regulated genes in Wounding from PMID: 30772301 | SOX2 |
| 3264 L3MBTL1   | SOX2 regulated genes in Wounding from PMID: 30772301 | SOX2 |
| 3265 SPRYD3    | SOX2 regulated genes in Wounding from PMID: 30772301 | SOX2 |
| 3266 TFIP11    | SOX2 regulated genes in Wounding from PMID: 30772301 | SOX2 |
| 3267 GOPC      | SOX2 regulated genes in Wounding from PMID: 30772301 | SOX2 |
| 3268 TMEFF1    | SOX2 regulated genes in Wounding from PMID: 30772301 | SOX2 |
| 3269 DSC3      | SOX2 regulated genes in Wounding from PMID: 30772301 | SOX2 |
| 3270 NFIL3     | SOX2 regulated genes in Wounding from PMID: 30772301 | SOX2 |
| 3271 NUDT15    | SOX2 regulated genes in Wounding from PMID: 30772301 | SOX2 |
| 3272 ARHGAP1   | SOX2 regulated genes in Wounding from PMID: 30772301 | SOX2 |
| 3273 ST8SIA6   | SOX2 regulated genes in Wounding from PMID: 30772301 | SOX2 |
| 3274 SLC24A3   | SOX2 regulated genes in Wounding from PMID: 30772301 | SOX2 |
| 3275 PAK3      | SOX2 regulated genes in Wounding from PMID: 30772301 | SOX2 |
| 3276 PLAGL2    | SOX2 regulated genes in Wounding from PMID: 30772301 | SOX2 |
| 3277 LGR4      | SOX2 regulated genes in Wounding from PMID: 30772301 | SOX2 |
| 3278 FHOD3     | SOX2 regulated genes in Wounding from PMID: 30772301 | SOX2 |
| 3279 SNU13     | SOX2 regulated genes in Wounding from PMID: 30772301 | SOX2 |
| 3280 KDM1B     | SOX2 regulated genes in Wounding from PMID: 30772301 | SOX2 |
| 3281 GOLGA7B   | SOX2 regulated genes in Wounding from PMID: 30772301 | SOX2 |
| 3282 BTBD9     | SOX2 regulated genes in Wounding from PMID: 30772301 | SOX2 |
| 3283 CHAC1     | SOX2 regulated genes in Wounding from PMID: 30772301 | SOX2 |
| 3284 ID4       | SOX2 regulated genes in Wounding from PMID: 30772301 | SOX2 |
| 3285 PDPF      | SOX2 regulated genes in Wounding from PMID: 30772301 | SOX2 |
| 3286 CSTF3     | SOX2 regulated genes in Wounding from PMID: 30772301 | SOX2 |
| 3287 RAP1GAP2  | SOX2 regulated genes in Wounding from PMID: 30772301 | SOX2 |
| 3288 LMAN1L    | SOX2 regulated genes in Wounding from PMID: 30772301 | SOX2 |
| 3289 ANG       | SOX2 regulated genes in Wounding from PMID: 30772301 | SOX2 |
| 3290 MED27     | SOX2 regulated genes in Wounding from PMID: 30772301 | SOX2 |
| 3291 EIF3A     | SOX2 regulated genes in Wounding from PMID: 30772301 | SOX2 |
| 3292 LMTK2     | SOX2 regulated genes in Wounding from PMID: 30772301 | SOX2 |



|                |                                                      |      |
|----------------|------------------------------------------------------|------|
| 3293 SERPINE1  | SOX2 regulated genes in Wounding from PMID: 30772301 | SOX2 |
| 3294 ENDOD1    | SOX2 regulated genes in Wounding from PMID: 30772301 | SOX2 |
| 3295 DLG5      | SOX2 regulated genes in Wounding from PMID: 30772301 | SOX2 |
| 3296 ARIH1     | SOX2 regulated genes in Wounding from PMID: 30772301 | SOX2 |
| 3297 SF3A1     | SOX2 regulated genes in Wounding from PMID: 30772301 | SOX2 |
| 3298 HSPA4L    | SOX2 regulated genes in Wounding from PMID: 30772301 | SOX2 |
| 3299 PPP1R3B   | SOX2 regulated genes in Wounding from PMID: 30772301 | SOX2 |
| 3300 PPP2R1B   | SOX2 regulated genes in Wounding from PMID: 30772301 | SOX2 |
| 3301 NEDD4L    | SOX2 regulated genes in Wounding from PMID: 30772301 | SOX2 |
| 3302 IPPK      | SOX2 regulated genes in Wounding from PMID: 30772301 | SOX2 |
| 3303 THOC1     | SOX2 regulated genes in Wounding from PMID: 30772301 | SOX2 |
| 3304 OVOL2     | SOX2 regulated genes in Wounding from PMID: 30772301 | SOX2 |
| 3305 LEPROTL1  | SOX2 regulated genes in Wounding from PMID: 30772301 | SOX2 |
| 3306 TCEAL3    | SOX2 regulated genes in Wounding from PMID: 30772301 | SOX2 |
| 3307 SLC30A9   | SOX2 regulated genes in Wounding from PMID: 30772301 | SOX2 |
| 3308 CHIC2     | SOX2 regulated genes in Wounding from PMID: 30772301 | SOX2 |
| 3309 DSG1      | SOX2 regulated genes in Wounding from PMID: 30772301 | SOX2 |
| 3310 PRDM1     | SOX2 regulated genes in Wounding from PMID: 30772301 | SOX2 |
| 3311 LIN7C     | SOX2 regulated genes in Wounding from PMID: 30772301 | SOX2 |
| 3312 COL17A1   | SOX2 regulated genes in Wounding from PMID: 30772301 | SOX2 |
| 3313 GCH1      | SOX2 regulated genes in Wounding from PMID: 30772301 | SOX2 |
| 3314 LONRF1    | SOX2 regulated genes in Wounding from PMID: 30772301 | SOX2 |
| 3315 EVC2      | SOX2 regulated genes in Wounding from PMID: 30772301 | SOX2 |
| 3316 MUC15     | SOX2 regulated genes in Wounding from PMID: 30772301 | SOX2 |
| 3317 MYO1E     | SOX2 regulated genes in Wounding from PMID: 30772301 | SOX2 |
| 3318 BTC       | SOX2 regulated genes in Wounding from PMID: 30772301 | SOX2 |
| 3319 BCORL1    | SOX2 regulated genes in Wounding from PMID: 30772301 | SOX2 |
| 3320 PDCL      | SOX2 regulated genes in Wounding from PMID: 30772301 | SOX2 |
| 3321 C15orf62  | SOX2 regulated genes in Wounding from PMID: 30772301 | SOX2 |
| 3322 CRNKL1    | SOX2 regulated genes in Wounding from PMID: 30772301 | SOX2 |
| 3323 RRP7A     | SOX2 regulated genes in Wounding from PMID: 30772301 | SOX2 |
| 3324 PLEKHA7   | SOX2 regulated genes in Wounding from PMID: 30772301 | SOX2 |
| 3325 COBL      | SOX2 regulated genes in Wounding from PMID: 30772301 | SOX2 |
| 3326 BCOR      | SOX2 regulated genes in Wounding from PMID: 30772301 | SOX2 |
| 3327 GPAT3     | SOX2 regulated genes in Wounding from PMID: 30772301 | SOX2 |
| 3328 CTDPI     | SOX2 regulated genes in Wounding from PMID: 30772301 | SOX2 |
| 3329 DHX32     | SOX2 regulated genes in Wounding from PMID: 30772301 | SOX2 |
| 3330 SLK       | SOX2 regulated genes in Wounding from PMID: 30772301 | SOX2 |
| 3331 CSTF2     | SOX2 regulated genes in Wounding from PMID: 30772301 | SOX2 |
| 3332 LIG3      | SOX2 regulated genes in Wounding from PMID: 30772301 | SOX2 |
| 3333 EEF1G     | SOX2 regulated genes in Wounding from PMID: 30772301 | SOX2 |
| 3334 CFAP46    | SOX2 regulated genes in Wounding from PMID: 30772301 | SOX2 |
| 3335 PPP1R14C  | SOX2 regulated genes in Wounding from PMID: 30772301 | SOX2 |
| 3336 STK26     | SOX2 regulated genes in Wounding from PMID: 30772301 | SOX2 |
| 3337 MEI1      | SOX2 regulated genes in Wounding from PMID: 30772301 | SOX2 |
| 3338 TLL1      | SOX2 regulated genes in Wounding from PMID: 30772301 | SOX2 |
| 3339 TMTC4     | SOX2 regulated genes in Wounding from PMID: 30772301 | SOX2 |
| 3340 GTF2E2    | SOX2 regulated genes in Wounding from PMID: 30772301 | SOX2 |
| 3341 RHOD      | SOX2 regulated genes in Wounding from PMID: 30772301 | SOX2 |
| 3342 HEPHL1    | SOX2 regulated genes in Wounding from PMID: 30772301 | SOX2 |
| 3343 ERVFRD-1  | SOX2 regulated genes in Wounding from PMID: 30772301 | SOX2 |
| 3344 RAB11FIP1 | SOX2 regulated genes in Wounding from PMID: 30772301 | SOX2 |
| 3345 MAPRE1    | SOX2 regulated genes in Wounding from PMID: 30772301 | SOX2 |
| 3346 CDCA4     | SOX2 regulated genes in Wounding from PMID: 30772301 | SOX2 |
| 3347 USP22     | SOX2 regulated genes in Wounding from PMID: 30772301 | SOX2 |
| 3348 TOP1      | SOX2 regulated genes in Wounding from PMID: 30772301 | SOX2 |
| 3349 TSPAN14   | SOX2 regulated genes in Wounding from PMID: 30772301 | SOX2 |
| 3350 TTPAL     | SOX2 regulated genes in Wounding from PMID: 30772301 | SOX2 |
| 3351 VPS4B     | SOX2 regulated genes in Wounding from PMID: 30772301 | SOX2 |
| 3352 XPNPEP1   | SOX2 regulated genes in Wounding from PMID: 30772301 | SOX2 |
| 3353 ZMYM5     | SOX2 regulated genes in Wounding from PMID: 30772301 | SOX2 |

|               |                                                      |      |
|---------------|------------------------------------------------------|------|
| 3354 WIPF2    | SOX2 regulated genes in Wounding from PMID: 30772301 | SOX2 |
| 3355 UTP14A   | SOX2 regulated genes in Wounding from PMID: 30772301 | SOX2 |
| 3356 ZNF407   | SOX2 regulated genes in Wounding from PMID: 30772301 | SOX2 |
| 3357 TOLLIP   | SOX2 regulated genes in Wounding from PMID: 30772301 | SOX2 |
| 3358 USP6     | SOX2 regulated genes in Wounding from PMID: 30772301 | SOX2 |
| 3359 TOM1     | SOX2 regulated genes in Wounding from PMID: 30772301 | SOX2 |
| 3360 TRPM6    | SOX2 regulated genes in Wounding from PMID: 30772301 | SOX2 |
| 3361 ZFAND2A  | SOX2 regulated genes in Wounding from PMID: 30772301 | SOX2 |
| 3362 UBE2A    | SOX2 regulated genes in Wounding from PMID: 30772301 | SOX2 |
| 3363 TUBB6    | SOX2 regulated genes in Wounding from PMID: 30772301 | SOX2 |
| 3364 TRIM29   | SOX2 regulated genes in Wounding from PMID: 30772301 | SOX2 |
| 3365 ZGPAT    | SOX2 regulated genes in Wounding from PMID: 30772301 | SOX2 |
| 3366 ZMYND19  | SOX2 regulated genes in Wounding from PMID: 30772301 | SOX2 |
| 3367 YWHAH    | SOX2 regulated genes in Wounding from PMID: 30772301 | SOX2 |
| 3368 TULP3    | SOX2 regulated genes in Wounding from PMID: 30772301 | SOX2 |
| 3369 TRIL     | SOX2 regulated genes in Wounding from PMID: 30772301 | SOX2 |
| 3370 TRAPPC8  | SOX2 regulated genes in Wounding from PMID: 30772301 | SOX2 |
| 3371 ZNF532   | SOX2 regulated genes in Wounding from PMID: 30772301 | SOX2 |
| 3372 YAP1     | SOX2 regulated genes in Wounding from PMID: 30772301 | SOX2 |
| 3373 ULK3     | SOX2 regulated genes in Wounding from PMID: 30772301 | SOX2 |
| 3374 TXNDC5   | SOX2 regulated genes in Wounding from PMID: 30772301 | SOX2 |
| 3375 WBP4     | SOX2 regulated genes in Wounding from PMID: 30772301 | SOX2 |
| 3376 ZDHHHC13 | SOX2 regulated genes in Wounding from PMID: 30772301 | SOX2 |
| 3377 TSPAN9   | SOX2 regulated genes in Wounding from PMID: 30772301 | SOX2 |
| 3378 TSPAN6   | SOX2 regulated genes in Wounding from PMID: 30772301 | SOX2 |
| 3379 UNC5B    | SOX2 regulated genes in Wounding from PMID: 30772301 | SOX2 |
| 3380 UMODL1   | SOX2 regulated genes in Wounding from PMID: 30772301 | SOX2 |
| 3381 TXNDC17  | SOX2 regulated genes in Wounding from PMID: 30772301 | SOX2 |
| 3382 TOMM22   | SOX2 regulated genes in Wounding from PMID: 30772301 | SOX2 |
| 3383 ZDHHHC9  | SOX2 regulated genes in Wounding from PMID: 30772301 | SOX2 |
| 3384 ZNRF2    | SOX2 regulated genes in Wounding from PMID: 30772301 | SOX2 |
| 3385 AFAP1    | SOX2 regulated genes in Wounding from PMID: 30772301 | SOX2 |
| 3386 CCDC112  | SOX2 regulated genes in Wounding from PMID: 30772301 | SOX2 |
| 3387 SYNE2    | SOX2 regulated genes in Wounding from PMID: 30772301 | SOX2 |
| 3388 FHDC1    | SOX2 regulated genes in Wounding from PMID: 30772301 | SOX2 |
| 3389 CCNC     | SOX2 regulated genes in Wounding from PMID: 30772301 | SOX2 |
| 3390 SOCS5    | SOX2 regulated genes in Wounding from PMID: 30772301 | SOX2 |
| 3391 NAP1L4   | SOX2 regulated genes in Wounding from PMID: 30772301 | SOX2 |
| 3392 ITGA3    | SOX2 regulated genes in Wounding from PMID: 30772301 | SOX2 |
| 3393 CLIC3    | SOX2 regulated genes in Wounding from PMID: 30772301 | SOX2 |
| 3394 SERPINA1 | SOX2 regulated genes in Wounding from PMID: 30772301 | SOX2 |
| 3395 AEBP2    | SOX2 regulated genes in Wounding from PMID: 30772301 | SOX2 |
| 3396 EFCAB1   | SOX2 regulated genes in Wounding from PMID: 30772301 | SOX2 |
| 3397 MSANTD3  | SOX2 regulated genes in Wounding from PMID: 30772301 | SOX2 |
| 3398 DNAJB13  | SOX2 regulated genes in Wounding from PMID: 30772301 | SOX2 |
| 3399 NCS1     | SOX2 regulated genes in Wounding from PMID: 30772301 | SOX2 |
| 3400 NOTCH1   | SOX2 regulated genes in Wounding from PMID: 30772301 | SOX2 |
| 3401 NUP62CL  | SOX2 regulated genes in Wounding from PMID: 30772301 | SOX2 |
| 3402 SMARCE1  | SOX2 regulated genes in Wounding from PMID: 30772301 | SOX2 |
| 3403 GDPD5    | SOX2 regulated genes in Wounding from PMID: 30772301 | SOX2 |
| 3404 CD151    | SOX2 regulated genes in Wounding from PMID: 30772301 | SOX2 |
| 3405 MGAT4A   | SOX2 regulated genes in Wounding from PMID: 30772301 | SOX2 |
| 3406 FAM135A  | SOX2 regulated genes in Wounding from PMID: 30772301 | SOX2 |
| 3407 BEGAIN   | SOX2 regulated genes in Wounding from PMID: 30772301 | SOX2 |
| 3408 CDK17    | SOX2 regulated genes in Wounding from PMID: 30772301 | SOX2 |
| 3409 BRAF     | SOX2 regulated genes in Wounding from PMID: 30772301 | SOX2 |
| 3410 ZNF597   | SOX2 regulated genes in Wounding from PMID: 30772301 | SOX2 |
| 3411 UTP14C   | SOX2 regulated genes in Wounding from PMID: 30772301 | SOX2 |
| 3412 KRTAP9-4 | SOX2 regulated genes in Wounding from PMID: 30772301 | SOX2 |
| 3413 EFL1     | SOX2 regulated genes in Wounding from PMID: 30772301 | SOX2 |
| 3414 RHBDL2   | SOX2 regulated genes in Wounding from PMID: 30772301 | SOX2 |

|               |                                                      |      |
|---------------|------------------------------------------------------|------|
| 3415 UBE2N    | SOX2 regulated genes in Wounding from PMID: 30772301 | SOX2 |
| 3416 WAPL     | SOX2 regulated genes in Wounding from PMID: 30772301 | SOX2 |
| 3417 CTNNB1   | SOX2 regulated genes in Wounding from PMID: 30772301 | SOX2 |
| 3418 SHB      | SOX2 regulated genes in Wounding from PMID: 30772301 | SOX2 |
| 3419 MYH9     | SOX2 regulated genes in Wounding from PMID: 30772301 | SOX2 |
| 3420 SERINC2  | SOX2 regulated genes in Wounding from PMID: 30772301 | SOX2 |
| 3421 ZNF664   | SOX2 regulated genes in Wounding from PMID: 30772301 | SOX2 |
| 3422 OSBPL5   | SOX2 regulated genes in Wounding from PMID: 30772301 | SOX2 |
| 3423 VPS35    | SOX2 regulated genes in Wounding from PMID: 30772301 | SOX2 |
| 3424 SNX18    | SOX2 regulated genes in Wounding from PMID: 30772301 | SOX2 |
| 3425 ATP11A   | SOX2 regulated genes in Wounding from PMID: 30772301 | SOX2 |
| 3426 PRSS8    | SOX2 regulated genes in Wounding from PMID: 30772301 | SOX2 |
| 3427 CPEB4    | SOX2 regulated genes in Wounding from PMID: 30772301 | SOX2 |
| 3428 PLEK2    | SOX2 regulated genes in Wounding from PMID: 30772301 | SOX2 |
| 3429 BICDL2   | SOX2 regulated genes in Wounding from PMID: 30772301 | SOX2 |
| 3430 LEO1     | SOX2 regulated genes in Wounding from PMID: 30772301 | SOX2 |
| 3431 NOCT     | SOX2 regulated genes in Wounding from PMID: 30772301 | SOX2 |
| 3432 UBAP1    | SOX2 regulated genes in Wounding from PMID: 30772301 | SOX2 |
| 3433 RAB23    | SOX2 regulated genes in Wounding from PMID: 30772301 | SOX2 |
| 3434 GUCA1B   | SOX2 regulated genes in Wounding from PMID: 30772301 | SOX2 |
| 3435 ZDHHCS   | SOX2 regulated genes in Wounding from PMID: 30772301 | SOX2 |
| 3436 BTBD11   | SOX2 regulated genes in Wounding from PMID: 30772301 | SOX2 |
| 3437 NCOR2    | SOX2 regulated genes in Wounding from PMID: 30772301 | SOX2 |
| 3438 TMEM51   | SOX2 regulated genes in Wounding from PMID: 30772301 | SOX2 |
| 3439 TGFA     | SOX2 regulated genes in Wounding from PMID: 30772301 | SOX2 |
| 3440 LPAR6    | SOX2 regulated genes in Wounding from PMID: 30772301 | SOX2 |
| 3441 MPHOSPH6 | SOX2 regulated genes in Wounding from PMID: 30772301 | SOX2 |
| 3442 MICB     | SOX2 regulated genes in Wounding from PMID: 30772301 | SOX2 |
| 3443 SLC39A4  | SOX2 regulated genes in Wounding from PMID: 30772301 | SOX2 |
| 3444 TMEM151A | SOX2 regulated genes in Wounding from PMID: 30772301 | SOX2 |
| 3445 TPM4     | SOX2 regulated genes in Wounding from PMID: 30772301 | SOX2 |
| 3446 DGKA     | SOX2 regulated genes in Wounding from PMID: 30772301 | SOX2 |
| 3447 TGM7     | SOX2 regulated genes in Wounding from PMID: 30772301 | SOX2 |
| 3448 DDX17    | SOX2 regulated genes in Wounding from PMID: 30772301 | SOX2 |
| 3449 ZNF365   | SOX2 regulated genes in Wounding from PMID: 30772301 | SOX2 |
| 3450 KAZN     | SOX2 regulated genes in Wounding from PMID: 30772301 | SOX2 |
| 3451 CD2BP2   | SOX2 regulated genes in Wounding from PMID: 30772301 | SOX2 |
| 3452 BMP3     | SOX2 regulated genes in Wounding from PMID: 30772301 | SOX2 |
| 3453 GNL2     | SOX2 regulated genes in Wounding from PMID: 30772301 | SOX2 |
| 3454 SFR1     | SOX2 regulated genes in Wounding from PMID: 30772301 | SOX2 |
| 3455 AREG     | SOX2 regulated genes in Wounding from PMID: 30772301 | SOX2 |
| 3456 DUSP5    | SOX2 regulated genes in Wounding from PMID: 30772301 | SOX2 |
| 3457 CUX1     | SOX2 regulated genes in Wounding from PMID: 30772301 | SOX2 |
| 3458 CPE      | SOX2 regulated genes in Wounding from PMID: 30772301 | SOX2 |
| 3459 ESRP2    | SOX2 regulated genes in Wounding from PMID: 30772301 | SOX2 |
| 3460 CA9      | SOX2 regulated genes in Wounding from PMID: 30772301 | SOX2 |
| 3461 PRKCH    | SOX2 regulated genes in Wounding from PMID: 30772301 | SOX2 |
| 3462 PAK1     | SOX2 regulated genes in Wounding from PMID: 30772301 | SOX2 |
| 3463 CPA4     | SOX2 regulated genes in Wounding from PMID: 30772301 | SOX2 |
| 3464 SNAI2    | SOX2 regulated genes in Wounding from PMID: 30772301 | SOX2 |
| 3465 DNAJB6   | SOX2 regulated genes in Wounding from PMID: 30772301 | SOX2 |
| 3466 BAG2     | SOX2 regulated genes in Wounding from PMID: 30772301 | SOX2 |
| 3467 KRT72    | SOX2 regulated genes in Wounding from PMID: 30772301 | SOX2 |
| 3468 DDX18    | SOX2 regulated genes in Wounding from PMID: 30772301 | SOX2 |
| 3469 PUM3     | SOX2 regulated genes in Wounding from PMID: 30772301 | SOX2 |
| 3470 REPS1    | SOX2 regulated genes in Wounding from PMID: 30772301 | SOX2 |
| 3471 CDK4     | SOX2 regulated genes in Wounding from PMID: 30772301 | SOX2 |
| 3472 FBXW8    | SOX2 regulated genes in Wounding from PMID: 30772301 | SOX2 |
| 3473 HAS2     | SOX2 regulated genes in Wounding from PMID: 30772301 | SOX2 |
| 3474 SYNJ2    | SOX2 regulated genes in Wounding from PMID: 30772301 | SOX2 |
| 3475 FHL2     | SOX2 regulated genes in Wounding from PMID: 30772301 | SOX2 |

|                |                                                      |      |
|----------------|------------------------------------------------------|------|
| 3476 GALR3     | SOX2 regulated genes in Wounding from PMID: 30772301 | SOX2 |
| 3477 PPP1R37   | SOX2 regulated genes in Wounding from PMID: 30772301 | SOX2 |
| 3478 UBE2Z     | SOX2 regulated genes in Wounding from PMID: 30772301 | SOX2 |
| 3479 RIOX2     | SOX2 regulated genes in Wounding from PMID: 30772301 | SOX2 |
| 3480 MAPKAPK3  | SOX2 regulated genes in Wounding from PMID: 30772301 | SOX2 |
| 3481 STRBP     | SOX2 regulated genes in Wounding from PMID: 30772301 | SOX2 |
| 3482 TENM4     | SOX2 regulated genes in Wounding from PMID: 30772301 | SOX2 |
| 3483 PARD3     | SOX2 regulated genes in Wounding from PMID: 30772301 | SOX2 |
| 3484 ST3GAL2   | SOX2 regulated genes in Wounding from PMID: 30772301 | SOX2 |
| 3485 TRIP6     | SOX2 regulated genes in Wounding from PMID: 30772301 | SOX2 |
| 3486 KLC2      | SOX2 regulated genes in Wounding from PMID: 30772301 | SOX2 |
| 3487 SRD5A2    | SOX2 regulated genes in Wounding from PMID: 30772301 | SOX2 |
| 3488 STX1A     | SOX2 regulated genes in Wounding from PMID: 30772301 | SOX2 |
| 3489 SLC5A5    | SOX2 regulated genes in Wounding from PMID: 30772301 | SOX2 |
| 3490 SCX       | SOX2 regulated genes in Wounding from PMID: 30772301 | SOX2 |
| 3491 TGM6      | SOX2 regulated genes in Wounding from PMID: 30772301 | SOX2 |
| 3492 TMC7      | SOX2 regulated genes in Wounding from PMID: 30772301 | SOX2 |
| 3493 SIPA1L3   | SOX2 regulated genes in Wounding from PMID: 30772301 | SOX2 |
| 3494 OTUD6B    | SOX2 regulated genes in Wounding from PMID: 30772301 | SOX2 |
| 3495 TMEM163   | SOX2 regulated genes in Wounding from PMID: 30772301 | SOX2 |
| 3496 GPSM1     | SOX2 regulated genes in Wounding from PMID: 30772301 | SOX2 |
| 3497 FSCN1     | SOX2 regulated genes in Wounding from PMID: 30772301 | SOX2 |
| 3498 ATP6V1C2  | SOX2 regulated genes in Wounding from PMID: 30772301 | SOX2 |
| 3499 NDFIP2    | SOX2 regulated genes in Wounding from PMID: 30772301 | SOX2 |
| 3500 EEF1AKMT1 | SOX2 regulated genes in Wounding from PMID: 30772301 | SOX2 |
| 3501 SKIL      | SOX2 regulated genes in Wounding from PMID: 30772301 | SOX2 |
| 3502 USP20     | SOX2 regulated genes in Wounding from PMID: 30772301 | SOX2 |
| 3503 SMDT1     | SOX2 regulated genes in Wounding from PMID: 30772301 | SOX2 |
| 3504 IFITM10   | SOX2 regulated genes in Wounding from PMID: 30772301 | SOX2 |
| 3505 RAB18     | SOX2 regulated genes in Wounding from PMID: 30772301 | SOX2 |
| 3506 STARD4    | SOX2 regulated genes in Wounding from PMID: 30772301 | SOX2 |
| 3507 ANKRD6    | SOX2 regulated genes in Wounding from PMID: 30772301 | SOX2 |
| 3508 EGR4      | SOX2 regulated genes in Wounding from PMID: 30772301 | SOX2 |
| 3509 FZD6      | SOX2 regulated genes in Wounding from PMID: 30772301 | SOX2 |
| 3510 CRB3      | SOX2 regulated genes in Wounding from PMID: 30772301 | SOX2 |
| 3511 CDKN2AIP  | SOX2 regulated genes in Wounding from PMID: 30772301 | SOX2 |
| 3512 PHLDB2    | SOX2 regulated genes in Wounding from PMID: 30772301 | SOX2 |
| 3513 TMTC3     | SOX2 regulated genes in Wounding from PMID: 30772301 | SOX2 |
| 3514 EPPK1     | SOX2 regulated genes in Wounding from PMID: 30772301 | SOX2 |
| 3515 SLC7A6    | SOX2 regulated genes in Wounding from PMID: 30772301 | SOX2 |
| 3516 LAP3      | SOX2 regulated genes in Wounding from PMID: 30772301 | SOX2 |
| 3517 ARHGEF16  | SOX2 regulated genes in Wounding from PMID: 30772301 | SOX2 |
| 3518 SSRP1     | SOX2 regulated genes in Wounding from PMID: 30772301 | SOX2 |
| 3519 MSX2      | SOX2 regulated genes in Wounding from PMID: 30772301 | SOX2 |
| 3520 BTBD10    | SOX2 regulated genes in Wounding from PMID: 30772301 | SOX2 |
| 3521 LRRFIP2   | SOX2 regulated genes in Wounding from PMID: 30772301 | SOX2 |
| 3522 GGACT     | SOX2 regulated genes in Wounding from PMID: 30772301 | SOX2 |
| 3523 SLC30A4   | SOX2 regulated genes in Wounding from PMID: 30772301 | SOX2 |
| 3524 SMYD5     | SOX2 regulated genes in Wounding from PMID: 30772301 | SOX2 |
| 3525 TUBB4B    | SOX2 regulated genes in Wounding from PMID: 30772301 | SOX2 |
| 3526 STIM2     | SOX2 regulated genes in Wounding from PMID: 30772301 | SOX2 |
| 3527 EIF4A1    | SOX2 regulated genes in Wounding from PMID: 30772301 | SOX2 |
| 3528 ANPEP     | SOX2 regulated genes in Wounding from PMID: 30772301 | SOX2 |
| 3529 SERINC5   | SOX2 regulated genes in Wounding from PMID: 30772301 | SOX2 |
| 3530 SCRG1     | SOX2 regulated genes in Wounding from PMID: 30772301 | SOX2 |
| 3531 SH3BGRL2  | SOX2 regulated genes in Wounding from PMID: 30772301 | SOX2 |
| 3532 HYAL2     | SOX2 regulated genes in Wounding from PMID: 30772301 | SOX2 |
| 3533 GDE1      | SOX2 regulated genes in Wounding from PMID: 30772301 | SOX2 |
| 3534 CHD7      | SOX2 regulated genes in Wounding from PMID: 30772301 | SOX2 |
| 3535 ARL1      | SOX2 regulated genes in Wounding from PMID: 30772301 | SOX2 |
| 3536 NIM1K     | SOX2 regulated genes in Wounding from PMID: 30772301 | SOX2 |

|                |                                                      |      |
|----------------|------------------------------------------------------|------|
| 3537 EIF3CL    | SOX2 regulated genes in Wounding from PMID: 30772301 | SOX2 |
| 3538 EIF3C     | SOX2 regulated genes in Wounding from PMID: 30772301 | SOX2 |
| 3539 SURF6     | SOX2 regulated genes in Wounding from PMID: 30772301 | SOX2 |
| 3540 ESRP1     | SOX2 regulated genes in Wounding from PMID: 30772301 | SOX2 |
| 3541 NAA15     | SOX2 regulated genes in Wounding from PMID: 30772301 | SOX2 |
| 3542 SMURF1    | SOX2 regulated genes in Wounding from PMID: 30772301 | SOX2 |
| 3543 FTSJ3     | SOX2 regulated genes in Wounding from PMID: 30772301 | SOX2 |
| 3544 RABL2B    | SOX2 regulated genes in Wounding from PMID: 30772301 | SOX2 |
| 3545 LPAR2     | SOX2 regulated genes in Wounding from PMID: 30772301 | SOX2 |
| 3546 ZCCHC7    | SOX2 regulated genes in Wounding from PMID: 30772301 | SOX2 |
| 3547 KLHL25    | SOX2 regulated genes in Wounding from PMID: 30772301 | SOX2 |
| 3548 GRIPAP1   | SOX2 regulated genes in Wounding from PMID: 30772301 | SOX2 |
| 3549 NBN       | SOX2 regulated genes in Wounding from PMID: 30772301 | SOX2 |
| 3550 LGALS3    | SOX2 regulated genes in Wounding from PMID: 30772301 | SOX2 |
| 3551 TMF1      | SOX2 regulated genes in Wounding from PMID: 30772301 | SOX2 |
| 3552 DZIP1L    | SOX2 regulated genes in Wounding from PMID: 30772301 | SOX2 |
| 3553 TUBB      | SOX2 regulated genes in Wounding from PMID: 30772301 | SOX2 |
| 3554 ZNF274    | SOX2 regulated genes in Wounding from PMID: 30772301 | SOX2 |
| 3555 GDNF      | SOX2 regulated genes in Wounding from PMID: 30772301 | SOX2 |
| 3556 MIA-RAB4B | SOX2 regulated genes in Wounding from PMID: 30772301 | SOX2 |
| 3557 MIA       | SOX2 regulated genes in Wounding from PMID: 30772301 | SOX2 |
| 3558 VPS36     | SOX2 regulated genes in Wounding from PMID: 30772301 | SOX2 |
| 3559 MATN3     | SOX2 regulated genes in Wounding from PMID: 30772301 | SOX2 |
| 3560 DCBLD1    | SOX2 regulated genes in Wounding from PMID: 30772301 | SOX2 |
| 3561 CLDN12    | SOX2 regulated genes in Wounding from PMID: 30772301 | SOX2 |
| 3562 CST6      | SOX2 regulated genes in Wounding from PMID: 30772301 | SOX2 |
| 3563 EIF2S3    | SOX2 regulated genes in Wounding from PMID: 30772301 | SOX2 |
| 3564 MAGEL2    | SOX2 regulated genes in Wounding from PMID: 30772301 | SOX2 |
| 3565 GALNT14   | SOX2 regulated genes in Wounding from PMID: 30772301 | SOX2 |
| 3566 YKT6      | SOX2 regulated genes in Wounding from PMID: 30772301 | SOX2 |
| 3567 WNK2      | SOX2 regulated genes in Wounding from PMID: 30772301 | SOX2 |
| 3568 TUBB2A    | SOX2 regulated genes in Wounding from PMID: 30772301 | SOX2 |
| 3569 EOGT      | SOX2 regulated genes in Wounding from PMID: 30772301 | SOX2 |
| 3570 ERCC6     | SOX2 regulated genes in Wounding from PMID: 30772301 | SOX2 |
| 3571 ZDHHC21   | SOX2 regulated genes in Wounding from PMID: 30772301 | SOX2 |
| 3572 TUBA1B    | SOX2 regulated genes in Wounding from PMID: 30772301 | SOX2 |
| 3573 GDF7      | SOX2 regulated genes in Wounding from PMID: 30772301 | SOX2 |
| 3574 IL6       | SOX2 regulated genes in Wounding from PMID: 30772301 | SOX2 |
| 3575 PADI4     | SOX2 regulated genes in Wounding from PMID: 30772301 | SOX2 |
| 3576 THSD1     | SOX2 regulated genes in Wounding from PMID: 30772301 | SOX2 |
| 3577 EIF2S1    | SOX2 regulated genes in Wounding from PMID: 30772301 | SOX2 |
| 3578 RHPN2     | SOX2 regulated genes in Wounding from PMID: 30772301 | SOX2 |
| 3579 ZC3H15    | SOX2 regulated genes in Wounding from PMID: 30772301 | SOX2 |
| 3580 FAM156A   | SOX2 regulated genes in Wounding from PMID: 30772301 | SOX2 |
| 3581 UHRF1BP1L | SOX2 regulated genes in Wounding from PMID: 30772301 | SOX2 |
| 3582 TAB3      | SOX2 regulated genes in Wounding from PMID: 30772301 | SOX2 |
| 3583 TAF4      | SOX2 regulated genes in Wounding from PMID: 30772301 | SOX2 |
| 3584 PPP1CA    | SOX2 regulated genes in Wounding from PMID: 30772301 | SOX2 |
| 3585 CYP21A2   | SOX2 regulated genes in Wounding from PMID: 30772301 | SOX2 |
| 3586 CDSN      | SOX2 regulated genes in Wounding from PMID: 30772301 | SOX2 |
| 3587 TUBB2B    | SOX2 regulated genes in Wounding from PMID: 30772301 | SOX2 |
| 3588 BHLHB9    | SOX2 regulated genes in Wounding from PMID: 30772301 | SOX2 |
| 3589 RNF19A    | SOX2 regulated genes in Wounding from PMID: 30772301 | SOX2 |
| 3590 SPATS2    | SOX2 regulated genes in Wounding from PMID: 30772301 | SOX2 |
| 3591 ARHGEF26  | SOX2 regulated genes in Wounding from PMID: 30772301 | SOX2 |
| 3592 NAB2      | SOX2 regulated genes in Wounding from PMID: 30772301 | SOX2 |
| 3593 CABLES2   | SOX2 regulated genes in Wounding from PMID: 30772301 | SOX2 |
| 3594 CREG2     | SOX2 regulated genes in Wounding from PMID: 30772301 | SOX2 |
| 3595 MTHFD2L   | SOX2 regulated genes in Wounding from PMID: 30772301 | SOX2 |
| 3596 RNF185    | SOX2 regulated genes in Wounding from PMID: 30772301 | SOX2 |
| 3597 PKP3      | SOX2 regulated genes in Wounding from PMID: 30772301 | SOX2 |

|                |                                                      |      |
|----------------|------------------------------------------------------|------|
| 3598 GNL3L     | SOX2 regulated genes in Wounding from PMID: 30772301 | SOX2 |
| 3599 ATF4      | SOX2 regulated genes in Wounding from PMID: 30772301 | SOX2 |
| 3600 GJB6      | SOX2 regulated genes in Wounding from PMID: 30772301 | SOX2 |
| 3601 CRIP2     | SOX2 regulated genes in Wounding from PMID: 30772301 | SOX2 |
| 3602 MAEA      | SOX2 regulated genes in Wounding from PMID: 30772301 | SOX2 |
| 3603 USP38     | SOX2 regulated genes in Wounding from PMID: 30772301 | SOX2 |
| 3604 COL4A6    | SOX2 regulated genes in Wounding from PMID: 30772301 | SOX2 |
| 3605 ILDR1     | SOX2 regulated genes in Wounding from PMID: 30772301 | SOX2 |
| 3606 MET       | SOX2 regulated genes in Wounding from PMID: 30772301 | SOX2 |
| 3607 MRPL48    | SOX2 regulated genes in Wounding from PMID: 30772301 | SOX2 |
| 3608 ZNF507    | SOX2 regulated genes in Wounding from PMID: 30772301 | SOX2 |
| 3609 OXSR1     | SOX2 regulated genes in Wounding from PMID: 30772301 | SOX2 |
| 3610 PTBP3     | SOX2 regulated genes in Wounding from PMID: 30772301 | SOX2 |
| 3611 GIPC1     | SOX2 regulated genes in Wounding from PMID: 30772301 | SOX2 |
| 3612 ADD2      | SOX2 regulated genes in Wounding from PMID: 30772301 | SOX2 |
| 3613 FBXW7     | SOX2 regulated genes in Wounding from PMID: 30772301 | SOX2 |
| 3614 TRAPPC13  | SOX2 regulated genes in Wounding from PMID: 30772301 | SOX2 |
| 3615 MARK3     | SOX2 regulated genes in Wounding from PMID: 30772301 | SOX2 |
| 3616 HNRNPA2B1 | SOX2 regulated genes in Wounding from PMID: 30772301 | SOX2 |
| 3617 ZBTB44    | SOX2 regulated genes in Wounding from PMID: 30772301 | SOX2 |
| 3618 BAMBI     | SOX2 regulated genes in Wounding from PMID: 30772301 | SOX2 |
| 3619 CEACAM21  | SOX2 regulated genes in Wounding from PMID: 30772301 | SOX2 |
| 3620 WASF1     | SOX2 regulated genes in Wounding from PMID: 30772301 | SOX2 |
| 3621 CTNS      | SOX2 regulated genes in Wounding from PMID: 30772301 | SOX2 |
| 3622 PELO      | SOX2 regulated genes in Wounding from PMID: 30772301 | SOX2 |
| 3623 UBE4B     | SOX2 regulated genes in Wounding from PMID: 30772301 | SOX2 |
| 3624 PDZD7     | SOX2 regulated genes in Wounding from PMID: 30772301 | SOX2 |
| 3625 CNKSR1    | SOX2 regulated genes in Wounding from PMID: 30772301 | SOX2 |
| 3626 GALT      | SOX2 regulated genes in Wounding from PMID: 30772301 | SOX2 |
| 3627 METAP2    | SOX2 regulated genes in Wounding from PMID: 30772301 | SOX2 |
| 3628 PLSCR3    | SOX2 regulated genes in Wounding from PMID: 30772301 | SOX2 |
| 3629 ABCE1     | SOX2 regulated genes in Wounding from PMID: 30772301 | SOX2 |
| 3630 RAB6A     | SOX2 regulated genes in Wounding from PMID: 30772301 | SOX2 |
| 3631 CMTM8     | SOX2 regulated genes in Wounding from PMID: 30772301 | SOX2 |
| 3632 FCHSD1    | SOX2 regulated genes in Wounding from PMID: 30772301 | SOX2 |
| 3633 CRIM1     | SOX2 regulated genes in Wounding from PMID: 30772301 | SOX2 |
| 3634 JUP       | SOX2 regulated genes in Wounding from PMID: 30772301 | SOX2 |
| 3635 GRHL2     | SOX2 regulated genes in Wounding from PMID: 30772301 | SOX2 |
| 3636 HSPA1A    | SOX2 regulated genes in Wounding from PMID: 30772301 | SOX2 |
| 3637 HSPA1B    | SOX2 regulated genes in Wounding from PMID: 30772301 | SOX2 |
| 3638 NEBL      | SOX2 regulated genes in Wounding from PMID: 30772301 | SOX2 |
| 3639 FBLIM1    | SOX2 regulated genes in Wounding from PMID: 30772301 | SOX2 |
| 3640 SHISA2    | SOX2 regulated genes in Wounding from PMID: 30772301 | SOX2 |
| 3641 PPFIA1    | SOX2 regulated genes in Wounding from PMID: 30772301 | SOX2 |
| 3642 UCP2      | SOX2 regulated genes in Wounding from PMID: 30772301 | SOX2 |
| 3643 COPS5     | SOX2 regulated genes in Wounding from PMID: 30772301 | SOX2 |
| 3644 DAPK2     | SOX2 regulated genes in Wounding from PMID: 30772301 | SOX2 |
| 3645 ESYT3     | SOX2 regulated genes in Wounding from PMID: 30772301 | SOX2 |
| 3646 CDK12     | SOX2 regulated genes in Wounding from PMID: 30772301 | SOX2 |
| 3647 BASP1     | SOX2 regulated genes in Wounding from PMID: 30772301 | SOX2 |
| 3648 MAP3K5    | SOX2 regulated genes in Wounding from PMID: 30772301 | SOX2 |
| 3649 AP3M1     | SOX2 regulated genes in Wounding from PMID: 30772301 | SOX2 |
| 3650 CNPY4     | SOX2 regulated genes in Wounding from PMID: 30772301 | SOX2 |
| 3651 PFKP      | SOX2 regulated genes in Wounding from PMID: 30772301 | SOX2 |
| 3652 PXDC1     | SOX2 regulated genes in Wounding from PMID: 30772301 | SOX2 |
| 3653 EHD3      | SOX2 regulated genes in Wounding from PMID: 30772301 | SOX2 |
| 3654 EXOSC3    | SOX2 regulated genes in Wounding from PMID: 30772301 | SOX2 |
| 3655 BCL2L2    | SOX2 regulated genes in Wounding from PMID: 30772301 | SOX2 |
| 3656 PPP4C     | SOX2 regulated genes in Wounding from PMID: 30772301 | SOX2 |
| 3657 SRF       | SOX2 regulated genes in Wounding from PMID: 30772301 | SOX2 |
| 3658 BCAR3     | SOX2 regulated genes in Wounding from PMID: 30772301 | SOX2 |

|                   |                                                      |      |
|-------------------|------------------------------------------------------|------|
| 3659 ATP8A2       | SOX2 regulated genes in Wounding from PMID: 30772301 | SOX2 |
| 3660 RCN1         | SOX2 regulated genes in Wounding from PMID: 30772301 | SOX2 |
| 3661 ALCAM        | SOX2 regulated genes in Wounding from PMID: 30772301 | SOX2 |
| 3662 HYAL4        | SOX2 regulated genes in Wounding from PMID: 30772301 | SOX2 |
| 3663 RFLNA        | SOX2 regulated genes in Wounding from PMID: 30772301 | SOX2 |
| 3664 TNIK         | SOX2 regulated genes in Wounding from PMID: 30772301 | SOX2 |
| 3665 DMTF1        | SOX2 regulated genes in Wounding from PMID: 30772301 | SOX2 |
| 3666 RIN1         | SOX2 regulated genes in Wounding from PMID: 30772301 | SOX2 |
| 3667 CALML3       | SOX2 regulated genes in Wounding from PMID: 30772301 | SOX2 |
| 3668 MREG         | SOX2 regulated genes in Wounding from PMID: 30772301 | SOX2 |
| 3669 YWHAG        | SOX2 regulated genes in Wounding from PMID: 30772301 | SOX2 |
| 3670 GPC2         | SOX2 regulated genes in Wounding from PMID: 30772301 | SOX2 |
| 3671 UBE2D3       | SOX2 regulated genes in Wounding from PMID: 30772301 | SOX2 |
| 3672 FZD1         | SOX2 regulated genes in Wounding from PMID: 30772301 | SOX2 |
| 3673 BARX2        | SOX2 regulated genes in Wounding from PMID: 30772301 | SOX2 |
| 3674 SLC22A23     | SOX2 regulated genes in Wounding from PMID: 30772301 | SOX2 |
| 3675 TNKS1BP1     | SOX2 regulated genes in Wounding from PMID: 30772301 | SOX2 |
| 3676 WNT10B       | SOX2 regulated genes in Wounding from PMID: 30772301 | SOX2 |
| 3677 CCR4         | SOX2 regulated genes in Wounding from PMID: 30772301 | SOX2 |
| 3678 DAAM1        | SOX2 regulated genes in Wounding from PMID: 30772301 | SOX2 |
| 3679 HCFC2        | SOX2 regulated genes in Wounding from PMID: 30772301 | SOX2 |
| 3680 MTERF4       | SOX2 regulated genes in Wounding from PMID: 30772301 | SOX2 |
| 3681 ATP10B       | SOX2 regulated genes in Wounding from PMID: 30772301 | SOX2 |
| 3682 TMPRSS13     | SOX2 regulated genes in Wounding from PMID: 30772301 | SOX2 |
| 3683 TACSTD2      | SOX2 regulated genes in Wounding from PMID: 30772301 | SOX2 |
| 3684 TRPV6        | SOX2 regulated genes in Wounding from PMID: 30772301 | SOX2 |
| 3685 TMPRSS7      | SOX2 regulated genes in Wounding from PMID: 30772301 | SOX2 |
| 3686 TLL10        | SOX2 regulated genes in Wounding from PMID: 30772301 | SOX2 |
| 3687 TRIB1        | SOX2 regulated genes in Wounding from PMID: 30772301 | SOX2 |
| 3688 SCNN1G       | SOX2 regulated genes in Wounding from PMID: 30772301 | SOX2 |
| 3689 CHMP3        | SOX2 regulated genes in Wounding from PMID: 30772301 | SOX2 |
| 3690 RNF103-CHMP3 | SOX2 regulated genes in Wounding from PMID: 30772301 | SOX2 |
| 3691 BPGM         | SOX2 regulated genes in Wounding from PMID: 30772301 | SOX2 |
| 3692 PRRC2B       | SOX2 regulated genes in Wounding from PMID: 30772301 | SOX2 |
| 3693 ALDH3A2      | SOX2 regulated genes in Wounding from PMID: 30772301 | SOX2 |
| 3694 SLC25A13     | SOX2 regulated genes in Wounding from PMID: 30772301 | SOX2 |
| 3695 BCL7A        | SOX2 regulated genes in Wounding from PMID: 30772301 | SOX2 |
| 3696 SERTAD1      | SOX2 regulated genes in Wounding from PMID: 30772301 | SOX2 |
| 3697 GPNMB        | SOX2 regulated genes in Wounding from PMID: 30772301 | SOX2 |
| 3698 SAE1         | SOX2 regulated genes in Wounding from PMID: 30772301 | SOX2 |
| 3699 DNAJC6       | SOX2 regulated genes in Wounding from PMID: 30772301 | SOX2 |
| 3700 STOX1        | SOX2 regulated genes in Wounding from PMID: 30772301 | SOX2 |
| 3701 DYNC1L12     | SOX2 regulated genes in Wounding from PMID: 30772301 | SOX2 |
| 3702 ZMYM2        | SOX2 regulated genes in Wounding from PMID: 30772301 | SOX2 |
| 3703 RABGEF1      | SOX2 regulated genes in Wounding from PMID: 30772301 | SOX2 |
| 3704 STBD1        | SOX2 regulated genes in Wounding from PMID: 30772301 | SOX2 |
| 3705 INTS6        | SOX2 regulated genes in Wounding from PMID: 30772301 | SOX2 |
| 3706 AP1AR        | SOX2 regulated genes in Wounding from PMID: 30772301 | SOX2 |
| 3707 DDX51        | SOX2 regulated genes in Wounding from PMID: 30772301 | SOX2 |
| 3708 PI4K2B       | SOX2 regulated genes in Wounding from PMID: 30772301 | SOX2 |
| 3709 PUF60        | SOX2 regulated genes in Wounding from PMID: 30772301 | SOX2 |
| 3710 SCT          | SOX2 regulated genes in Wounding from PMID: 30772301 | SOX2 |
| 3711 ANAPC2       | SOX2 regulated genes in Wounding from PMID: 30772301 | SOX2 |
| 3712 CYP4F12      | SOX2 regulated genes in Wounding from PMID: 30772301 | SOX2 |
| 3713 CDCP1        | SOX2 regulated genes in Wounding from PMID: 30772301 | SOX2 |
| 3714 TJP2         | SOX2 regulated genes in Wounding from PMID: 30772301 | SOX2 |
| 3715 VCP          | SOX2 regulated genes in Wounding from PMID: 30772301 | SOX2 |
| 3716 PDZRN3       | SOX2 regulated genes in Wounding from PMID: 30772301 | SOX2 |
| 3717 SRC          | SOX2 regulated genes in Wounding from PMID: 30772301 | SOX2 |
| 3718 CA6          | SOX2 regulated genes in Wounding from PMID: 30772301 | SOX2 |
| 3719 LMNB1        | SOX2 regulated genes in Wounding from PMID: 30772301 | SOX2 |

|               |                                                      |      |
|---------------|------------------------------------------------------|------|
| 3720 SH3YL1   | SOX2 regulated genes in Wounding from PMID: 30772301 | SOX2 |
| 3721 JMY      | SOX2 regulated genes in Wounding from PMID: 30772301 | SOX2 |
| 3722 NUMB     | SOX2 regulated genes in Wounding from PMID: 30772301 | SOX2 |
| 3723 TOB1     | SOX2 regulated genes in Wounding from PMID: 30772301 | SOX2 |
| 3724 GIPC2    | SOX2 regulated genes in Wounding from PMID: 30772301 | SOX2 |
| 3725 FOXK2    | SOX2 regulated genes in Wounding from PMID: 30772301 | SOX2 |
| 3726 IMP4     | SOX2 regulated genes in Wounding from PMID: 30772301 | SOX2 |
| 3727 KATNBL1  | SOX2 regulated genes in Wounding from PMID: 30772301 | SOX2 |
| 3728 HSPA14   | SOX2 regulated genes in Wounding from PMID: 30772301 | SOX2 |
| 3729 NFE2L3   | SOX2 regulated genes in Wounding from PMID: 30772301 | SOX2 |
| 3730 YWHAZ    | SOX2 regulated genes in Wounding from PMID: 30772301 | SOX2 |
| 3731 PTPRF    | SOX2 regulated genes in Wounding from PMID: 30772301 | SOX2 |
| 3732 SLC38A5  | SOX2 regulated genes in Wounding from PMID: 30772301 | SOX2 |
| 3733 ACP7     | SOX2 regulated genes in Wounding from PMID: 30772301 | SOX2 |
| 3734 KCTD4    | SOX2 regulated genes in Wounding from PMID: 30772301 | SOX2 |
| 3735 HEPH     | SOX2 regulated genes in Wounding from PMID: 30772301 | SOX2 |
| 3736 ETF1     | SOX2 regulated genes in Wounding from PMID: 30772301 | SOX2 |
| 3737 FLRT2    | SOX2 regulated genes in Wounding from PMID: 30772301 | SOX2 |
| 3738 GCNT4    | SOX2 regulated genes in Wounding from PMID: 30772301 | SOX2 |
| 3739 NRBP2    | SOX2 regulated genes in Wounding from PMID: 30772301 | SOX2 |
| 3740 PNLDC1   | SOX2 regulated genes in Wounding from PMID: 30772301 | SOX2 |
| 3741 WHRN     | SOX2 regulated genes in Wounding from PMID: 30772301 | SOX2 |
| 3742 TMEM64   | SOX2 regulated genes in Wounding from PMID: 30772301 | SOX2 |
| 3743 TRO      | SOX2 regulated genes in Wounding from PMID: 30772301 | SOX2 |
| 3744 PPARD    | SOX2 regulated genes in Wounding from PMID: 30772301 | SOX2 |
| 3745 SH3D19   | SOX2 regulated genes in Wounding from PMID: 30772301 | SOX2 |
| 3746 SRSF12   | SOX2 regulated genes in Wounding from PMID: 30772301 | SOX2 |
| 3747 AGAP3    | SOX2 regulated genes in Wounding from PMID: 30772301 | SOX2 |
| 3748 C5orf46  | SOX2 regulated genes in Wounding from PMID: 30772301 | SOX2 |
| 3749 SYT17    | SOX2 regulated genes in Wounding from PMID: 30772301 | SOX2 |
| 3750 PLAUR    | SOX2 regulated genes in Wounding from PMID: 30772301 | SOX2 |
| 3751 SNN      | SOX2 regulated genes in Wounding from PMID: 30772301 | SOX2 |
| 3752 UBAP2    | SOX2 regulated genes in Wounding from PMID: 30772301 | SOX2 |
| 3753 MFSD13A  | SOX2 regulated genes in Wounding from PMID: 30772301 | SOX2 |
| 3754 EPB41L4A | SOX2 regulated genes in Wounding from PMID: 30772301 | SOX2 |
| 3755 PREP     | SOX2 regulated genes in Wounding from PMID: 30772301 | SOX2 |
| 3756 TSSK1B   | SOX2 regulated genes in Wounding from PMID: 30772301 | SOX2 |
| 3757 ATP6V0A4 | SOX2 regulated genes in Wounding from PMID: 30772301 | SOX2 |
| 3758 LXN      | SOX2 regulated genes in Wounding from PMID: 30772301 | SOX2 |
| 3759 DUSP6    | SOX2 regulated genes in Wounding from PMID: 30772301 | SOX2 |
| 3760 SATB2    | SOX2 regulated genes in Wounding from PMID: 30772301 | SOX2 |
| 3761 GORASP2  | SOX2 regulated genes in Wounding from PMID: 30772301 | SOX2 |
| 3762 KDM5C    | SOX2 regulated genes in Wounding from PMID: 30772301 | SOX2 |
| 3763 DGKZ     | SOX2 regulated genes in Wounding from PMID: 30772301 | SOX2 |
| 3764 OTUB2    | SOX2 regulated genes in Wounding from PMID: 30772301 | SOX2 |
| 3765 EEA1     | SOX2 regulated genes in Wounding from PMID: 30772301 | SOX2 |
| 3766 VSIG10   | SOX2 regulated genes in Wounding from PMID: 30772301 | SOX2 |
| 3767 ALDH1A3  | SOX2 regulated genes in Wounding from PMID: 30772301 | SOX2 |
| 3768 USP32    | SOX2 regulated genes in Wounding from PMID: 30772301 | SOX2 |
| 3769 ANKLE1   | SOX2 regulated genes in Wounding from PMID: 30772301 | SOX2 |
| 3770 AKIRIN2  | SOX2 regulated genes in Wounding from PMID: 30772301 | SOX2 |
| 3771 SAMD5    | SOX2 regulated genes in Wounding from PMID: 30772301 | SOX2 |
| 3772 DYNLT1   | SOX2 regulated genes in Wounding from PMID: 30772301 | SOX2 |
| 3773 PTK2     | SOX2 regulated genes in Wounding from PMID: 30772301 | SOX2 |
| 3774 CROT     | SOX2 regulated genes in Wounding from PMID: 30772301 | SOX2 |
| 3775 XBP1     | SOX2 regulated genes in Wounding from PMID: 30772301 | SOX2 |
| 3776 PTK2B    | SOX2 regulated genes in Wounding from PMID: 30772301 | SOX2 |
| 3777 TCF7L1   | SOX2 regulated genes in Wounding from PMID: 30772301 | SOX2 |
| 3778 CBX1     | SOX2 regulated genes in Wounding from PMID: 30772301 | SOX2 |
| 3779 GABRP    | SOX2 regulated genes in Wounding from PMID: 30772301 | SOX2 |
| 3780 FZD2     | SOX2 regulated genes in Wounding from PMID: 30772301 | SOX2 |



|                |                                                      |      |
|----------------|------------------------------------------------------|------|
| 3781 BAIAP2L1  | SOX2 regulated genes in Wounding from PMID: 30772301 | SOX2 |
| 3782 PINLYP    | SOX2 regulated genes in Wounding from PMID: 30772301 | SOX2 |
| 3783 STIP1     | SOX2 regulated genes in Wounding from PMID: 30772301 | SOX2 |
| 3784 CLDND1    | SOX2 regulated genes in Wounding from PMID: 30772301 | SOX2 |
| 3785 C1QTNF12  | SOX2 regulated genes in Wounding from PMID: 30772301 | SOX2 |
| 3786 DYNLL1    | SOX2 regulated genes in Wounding from PMID: 30772301 | SOX2 |
| 3787 SLCO4C1   | SOX2 regulated genes in Wounding from PMID: 30772301 | SOX2 |
| 3788 GJB2      | SOX2 regulated genes in Wounding from PMID: 30772301 | SOX2 |
| 3789 CCL27     | SOX2 regulated genes in Wounding from PMID: 30772301 | SOX2 |
| 3790 GABARAPL2 | SOX2 regulated genes in Wounding from PMID: 30772301 | SOX2 |
| 3791 CDC42BPG  | SOX2 regulated genes in Wounding from PMID: 30772301 | SOX2 |
| 3792 GLB1L2    | SOX2 regulated genes in Wounding from PMID: 30772301 | SOX2 |
| 3793 SLC35A2   | SOX2 regulated genes in Wounding from PMID: 30772301 | SOX2 |
| 3794 JPH4      | SOX2 regulated genes in Wounding from PMID: 30772301 | SOX2 |
| 3795 STRN      | SOX2 regulated genes in Wounding from PMID: 30772301 | SOX2 |
| 3796 RET       | SOX2 regulated genes in Wounding from PMID: 30772301 | SOX2 |
| 3797 GPR37     | SOX2 regulated genes in Wounding from PMID: 30772301 | SOX2 |
| 3798 BOK       | SOX2 regulated genes in Wounding from PMID: 30772301 | SOX2 |
| 3799 CTSF      | SOX2 regulated genes in Wounding from PMID: 30772301 | SOX2 |
| 3800 RTKN2     | SOX2 regulated genes in Wounding from PMID: 30772301 | SOX2 |
| 3801 PEBP1     | SOX2 regulated genes in Wounding from PMID: 30772301 | SOX2 |
| 3802 C3orf18   | SOX2 regulated genes in Wounding from PMID: 30772301 | SOX2 |
| 3803 GAN       | SOX2 regulated genes in Wounding from PMID: 30772301 | SOX2 |
| 3804 EIF4A3    | SOX2 regulated genes in Wounding from PMID: 30772301 | SOX2 |
| 3805 SOWAHB    | SOX2 regulated genes in Wounding from PMID: 30772301 | SOX2 |
| 3806 SUN2      | SOX2 regulated genes in Wounding from PMID: 30772301 | SOX2 |
| 3807 GPC1      | SOX2 regulated genes in Wounding from PMID: 30772301 | SOX2 |
| 3808 TDRD9     | SOX2 regulated genes in Wounding from PMID: 30772301 | SOX2 |
| 3809 BCO1      | SOX2 regulated genes in Wounding from PMID: 30772301 | SOX2 |
| 3810 EML4      | SOX2 regulated genes in Wounding from PMID: 30772301 | SOX2 |
| 3811 THAP1     | SOX2 regulated genes in Wounding from PMID: 30772301 | SOX2 |
| 3812 RGS9      | SOX2 regulated genes in Wounding from PMID: 30772301 | SOX2 |
| 3813 TTLL7     | SOX2 regulated genes in Wounding from PMID: 30772301 | SOX2 |
| 3814 IGF1R     | SOX2 regulated genes in Wounding from PMID: 30772301 | SOX2 |
| 3815 EPGN      | SOX2 regulated genes in Wounding from PMID: 30772301 | SOX2 |
| 3816 VASN      | SOX2 regulated genes in Wounding from PMID: 30772301 | SOX2 |
| 3817 CRISP3    | SOX2 regulated genes in Wounding from PMID: 30772301 | SOX2 |
| 3818 EIF1AX    | SOX2 regulated genes in Wounding from PMID: 30772301 | SOX2 |
| 3819 HSPA2     | SOX2 regulated genes in Wounding from PMID: 30772301 | SOX2 |
| 3820 BTG1      | SOX2 regulated genes in Wounding from PMID: 30772301 | SOX2 |
| 3821 KIAA1191  | SOX2 regulated genes in Wounding from PMID: 30772301 | SOX2 |
| 3822 TPM1      | SOX2 regulated genes in Wounding from PMID: 30772301 | SOX2 |
| 3823 UNC45A    | SOX2 regulated genes in Wounding from PMID: 30772301 | SOX2 |
| 3824 EIF4G2    | SOX2 regulated genes in Wounding from PMID: 30772301 | SOX2 |
| 3825 PPP1R36   | SOX2 regulated genes in Wounding from PMID: 30772301 | SOX2 |
| 3826 DUSP2     | SOX2 regulated genes in Wounding from PMID: 30772301 | SOX2 |
| 3827 C11orf52  | SOX2 regulated genes in Wounding from PMID: 30772301 | SOX2 |
| 3828 TMEM62    | SOX2 regulated genes in Wounding from PMID: 30772301 | SOX2 |
| 3829 CXCL14    | SOX2 regulated genes in Wounding from PMID: 30772301 | SOX2 |
| 3830 CAMTA1    | SOX2 regulated genes in Wounding from PMID: 30772301 | SOX2 |
| 3831 SERTAD2   | SOX2 regulated genes in Wounding from PMID: 30772301 | SOX2 |
| 3832 PLS3      | SOX2 regulated genes in Wounding from PMID: 30772301 | SOX2 |
| 3833 SIAH2     | SOX2 regulated genes in Wounding from PMID: 30772301 | SOX2 |
| 3834 NOL10     | SOX2 regulated genes in Wounding from PMID: 30772301 | SOX2 |
| 3835 ZNF827    | SOX2 regulated genes in Wounding from PMID: 30772301 | SOX2 |
| 3836 ITGB6     | SOX2 regulated genes in Wounding from PMID: 30772301 | SOX2 |
| 3837 EIF1AD    | SOX2 regulated genes in Wounding from PMID: 30772301 | SOX2 |
| 3838 PCYOX1    | SOX2 regulated genes in Wounding from PMID: 30772301 | SOX2 |
| 3839 IGF2BP1   | SOX2 regulated genes in Wounding from PMID: 30772301 | SOX2 |
| 3840 FADS3     | SOX2 regulated genes in Wounding from PMID: 30772301 | SOX2 |
| 3841 SMARCC1   | SOX2 regulated genes in Wounding from PMID: 30772301 | SOX2 |

|               |                                                      |      |
|---------------|------------------------------------------------------|------|
| 3842 MT4      | SOX2 regulated genes in Wounding from PMID: 30772301 | SOX2 |
| 3843 ATXN2    | SOX2 regulated genes in Wounding from PMID: 30772301 | SOX2 |
| 3844 FAM47E   | SOX2 regulated genes in Wounding from PMID: 30772301 | SOX2 |
| 3845 STK39    | SOX2 regulated genes in Wounding from PMID: 30772301 | SOX2 |
| 3846 ANO9     | SOX2 regulated genes in Wounding from PMID: 30772301 | SOX2 |
| 3847 POLH     | SOX2 regulated genes in Wounding from PMID: 30772301 | SOX2 |
| 3848 TNFAIP1  | SOX2 regulated genes in Wounding from PMID: 30772301 | SOX2 |
| 3849 FAM107B  | SOX2 regulated genes in Wounding from PMID: 30772301 | SOX2 |
| 3850 DENR     | SOX2 regulated genes in Wounding from PMID: 30772301 | SOX2 |
| 3851 PPP2R5B  | SOX2 regulated genes in Wounding from PMID: 30772301 | SOX2 |
| 3852 CCNO     | SOX2 regulated genes in Wounding from PMID: 30772301 | SOX2 |
| 3853 HSD17B14 | SOX2 regulated genes in Wounding from PMID: 30772301 | SOX2 |
| 3854 LY6D     | SOX2 regulated genes in Wounding from PMID: 30772301 | SOX2 |
| 3855 CSRN1    | SOX2 regulated genes in Wounding from PMID: 30772301 | SOX2 |
| 3856 DLX2     | SOX2 regulated genes in Wounding from PMID: 30772301 | SOX2 |
| 3857 CA2      | SOX2 regulated genes in Wounding from PMID: 30772301 | SOX2 |
| 3858 SLC35F6  | SOX2 regulated genes in Wounding from PMID: 30772301 | SOX2 |
| 3859 CARM1    | SOX2 regulated genes in Wounding from PMID: 30772301 | SOX2 |
| 3860 PSMD12   | SOX2 regulated genes in Wounding from PMID: 30772301 | SOX2 |
| 3861 EDF1     | SOX2 regulated genes in Wounding from PMID: 30772301 | SOX2 |
| 3862 PLCXD2   | SOX2 regulated genes in Wounding from PMID: 30772301 | SOX2 |
| 3863 DDX19A   | SOX2 regulated genes in Wounding from PMID: 30772301 | SOX2 |
| 3864 PURB     | SOX2 regulated genes in Wounding from PMID: 30772301 | SOX2 |
| 3865 SEC23IP  | SOX2 regulated genes in Wounding from PMID: 30772301 | SOX2 |
| 3866 HIF1A    | SOX2 regulated genes in Wounding from PMID: 30772301 | SOX2 |
| 3867 UBA2     | SOX2 regulated genes in Wounding from PMID: 30772301 | SOX2 |
| 3868 ALG9     | SOX2 regulated genes in Wounding from PMID: 30772301 | SOX2 |
| 3869 FBP1     | SOX2 regulated genes in Wounding from PMID: 30772301 | SOX2 |
| 3870 N4BP3    | SOX2 regulated genes in Wounding from PMID: 30772301 | SOX2 |
| 3871 CSNK1G3  | SOX2 regulated genes in Wounding from PMID: 30772301 | SOX2 |
| 3872 PLEKHG3  | SOX2 regulated genes in Wounding from PMID: 30772301 | SOX2 |
| 3873 PPP2R1A  | SOX2 regulated genes in Wounding from PMID: 30772301 | SOX2 |
| 3874 BOP1     | SOX2 regulated genes in Wounding from PMID: 30772301 | SOX2 |
| 3875 ZNF185   | SOX2 regulated genes in Wounding from PMID: 30772301 | SOX2 |
| 3876 ZBTB1    | SOX2 regulated genes in Wounding from PMID: 30772301 | SOX2 |
| 3877 OPLAH    | SOX2 regulated genes in Wounding from PMID: 30772301 | SOX2 |
| 3878 KRT80    | SOX2 regulated genes in Wounding from PMID: 30772301 | SOX2 |
| 3879 TRPM4    | SOX2 regulated genes in Wounding from PMID: 30772301 | SOX2 |
| 3880 MAP3K20  | SOX2 regulated genes in Wounding from PMID: 30772301 | SOX2 |
| 3881 OSGIN1   | SOX2 regulated genes in Wounding from PMID: 30772301 | SOX2 |
| 3882 GPC3     | SOX2 regulated genes in Wounding from PMID: 30772301 | SOX2 |
| 3883 POLR2J3  | SOX2 regulated genes in Wounding from PMID: 30772301 | SOX2 |
| 3884 UPK3BL1  | SOX2 regulated genes in Wounding from PMID: 30772301 | SOX2 |
| 3885 UPK3BL2  | SOX2 regulated genes in Wounding from PMID: 30772301 | SOX2 |
| 3886 PLCH2    | SOX2 regulated genes in Wounding from PMID: 30772301 | SOX2 |
| 3887 CNIH2    | SOX2 regulated genes in Wounding from PMID: 30772301 | SOX2 |
| 3888 CRYM     | SOX2 regulated genes in Wounding from PMID: 30772301 | SOX2 |
| 3889 EPS8L1   | SOX2 regulated genes in Wounding from PMID: 30772301 | SOX2 |
| 3890 LCN12    | SOX2 regulated genes in Wounding from PMID: 30772301 | SOX2 |
| 3891 GTF2H2   | SOX2 regulated genes in Wounding from PMID: 30772301 | SOX2 |
| 3892 SLC20A2  | SOX2 regulated genes in Wounding from PMID: 30772301 | SOX2 |
| 3893 SCAPER   | SOX2 regulated genes in Wounding from PMID: 30772301 | SOX2 |
| 3894 SLC38A3  | SOX2 regulated genes in Wounding from PMID: 30772301 | SOX2 |
| 3895 SH2D4A   | SOX2 regulated genes in Wounding from PMID: 30772301 | SOX2 |
| 3896 NAE1     | SOX2 regulated genes in Wounding from PMID: 30772301 | SOX2 |
| 3897 MYCL     | SOX2 regulated genes in Wounding from PMID: 30772301 | SOX2 |
| 3898 YWHAQ    | SOX2 regulated genes in Wounding from PMID: 30772301 | SOX2 |
| 3899 NEK5     | SOX2 regulated genes in Wounding from PMID: 30772301 | SOX2 |
| 3900 PTPRN2   | SOX2 regulated genes in Wounding from PMID: 30772301 | SOX2 |
| 3901 TAGLN3   | SOX2 regulated genes in Wounding from PMID: 30772301 | SOX2 |
| 3902 METAP1   | SOX2 regulated genes in Wounding from PMID: 30772301 | SOX2 |

|               |                                                      |      |
|---------------|------------------------------------------------------|------|
| 3903 PLEKHG1  | SOX2 regulated genes in Wounding from PMID: 30772301 | SOX2 |
| 3904 POLD4    | SOX2 regulated genes in Wounding from PMID: 30772301 | SOX2 |
| 3905 CLDN3    | SOX2 regulated genes in Wounding from PMID: 30772301 | SOX2 |
| 3906 SRRT     | SOX2 regulated genes in Wounding from PMID: 30772301 | SOX2 |
| 3907 UNC93A   | SOX2 regulated genes in Wounding from PMID: 30772301 | SOX2 |
| 3908 EIF4E    | SOX2 regulated genes in Wounding from PMID: 30772301 | SOX2 |
| 3909 PXYLP1   | SOX2 regulated genes in Wounding from PMID: 30772301 | SOX2 |
| 3910 EPCAM    | SOX2 regulated genes in Wounding from PMID: 30772301 | SOX2 |
| 3911 WRNIP1   | SOX2 regulated genes in Wounding from PMID: 30772301 | SOX2 |
| 3912 LATS1    | SOX2 regulated genes in Wounding from PMID: 30772301 | SOX2 |
| 3913 PAPSS2   | SOX2 regulated genes in Wounding from PMID: 30772301 | SOX2 |
| 3914 ANKH     | SOX2 regulated genes in Wounding from PMID: 30772301 | SOX2 |
| 3915 PPP1CB   | SOX2 regulated genes in Wounding from PMID: 30772301 | SOX2 |
| 3916 C4orf36  | SOX2 regulated genes in Wounding from PMID: 30772301 | SOX2 |
| 3917 CLASRP   | SOX2 regulated genes in Wounding from PMID: 30772301 | SOX2 |
| 3918 DHX16    | SOX2 regulated genes in Wounding from PMID: 30772301 | SOX2 |
| 3919 PSCA     | SOX2 regulated genes in Wounding from PMID: 30772301 | SOX2 |
| 3920 NECAB1   | SOX2 regulated genes in Wounding from PMID: 30772301 | SOX2 |
| 3921 CKAP4    | SOX2 regulated genes in Wounding from PMID: 30772301 | SOX2 |
| 3922 BNC2     | SOX2 regulated genes in Wounding from PMID: 30772301 | SOX2 |
| 3923 PDZD2    | SOX2 regulated genes in Wounding from PMID: 30772301 | SOX2 |
| 3924 ENOX1    | SOX2 regulated genes in Wounding from PMID: 30772301 | SOX2 |
| 3925 PRKCI    | SOX2 regulated genes in Wounding from PMID: 30772301 | SOX2 |
| 3926 XRCC1    | SOX2 regulated genes in Wounding from PMID: 30772301 | SOX2 |
| 3927 MPRIP    | SOX2 regulated genes in Wounding from PMID: 30772301 | SOX2 |
| 3928 BMPR1B   | SOX2 regulated genes in Wounding from PMID: 30772301 | SOX2 |
| 3929 CCK      | SOX2 regulated genes in Wounding from PMID: 30772301 | SOX2 |
| 3930 LHX2     | SOX2 regulated genes in Wounding from PMID: 30772301 | SOX2 |
| 3931 SP6      | SOX2 regulated genes in Wounding from PMID: 30772301 | SOX2 |
| 3932 MFSD6    | SOX2 regulated genes in Wounding from PMID: 30772301 | SOX2 |
| 3933 TOM1L1   | SOX2 regulated genes in Wounding from PMID: 30772301 | SOX2 |
| 3934 FAM83H   | SOX2 regulated genes in Wounding from PMID: 30772301 | SOX2 |
| 3935 AFF4     | SOX2 regulated genes in Wounding from PMID: 30772301 | SOX2 |
| 3936 PIP4K2C  | SOX2 regulated genes in Wounding from PMID: 30772301 | SOX2 |
| 3937 RNF144B  | SOX2 regulated genes in Wounding from PMID: 30772301 | SOX2 |
| 3938 RBM15B   | SOX2 regulated genes in Wounding from PMID: 30772301 | SOX2 |
| 3939 LGALS12  | SOX2 regulated genes in Wounding from PMID: 30772301 | SOX2 |
| 3940 ATP6V1G1 | SOX2 regulated genes in Wounding from PMID: 30772301 | SOX2 |
| 3941 SCARB2   | SOX2 regulated genes in Wounding from PMID: 30772301 | SOX2 |
| 3942 INTS8    | SOX2 regulated genes in Wounding from PMID: 30772301 | SOX2 |
| 3943 MTFR1    | SOX2 regulated genes in Wounding from PMID: 30772301 | SOX2 |
| 3944 AHI1     | SOX2 regulated genes in Wounding from PMID: 30772301 | SOX2 |
| 3945 PGAP2    | SOX2 regulated genes in Wounding from PMID: 30772301 | SOX2 |
| 3946 PHRF1    | SOX2 regulated genes in Wounding from PMID: 30772301 | SOX2 |
| 3947 MYC      | SOX2 regulated genes in Wounding from PMID: 30772301 | SOX2 |
| 3948 PPRC1    | SOX2 regulated genes in Wounding from PMID: 30772301 | SOX2 |
| 3949 SIGMAR1  | SOX2 regulated genes in Wounding from PMID: 30772301 | SOX2 |
| 3950 CLIC4    | SOX2 regulated genes in Wounding from PMID: 30772301 | SOX2 |
| 3951 ARNTL    | SOX2 regulated genes in Wounding from PMID: 30772301 | SOX2 |
| 3952 CADM4    | SOX2 regulated genes in Wounding from PMID: 30772301 | SOX2 |
| 3953 GARNL3   | SOX2 regulated genes in Wounding from PMID: 30772301 | SOX2 |
| 3954 SPINK5   | SOX2 regulated genes in Wounding from PMID: 30772301 | SOX2 |
| 3955 PPP1R10  | SOX2 regulated genes in Wounding from PMID: 30772301 | SOX2 |
| 3956 FFAR3    | SOX2 regulated genes in Wounding from PMID: 30772301 | SOX2 |
| 3957 SEC16A   | SOX2 regulated genes in Wounding from PMID: 30772301 | SOX2 |
| 3958 BCAR1    | SOX2 regulated genes in Wounding from PMID: 30772301 | SOX2 |
| 3959 SC5D     | SOX2 regulated genes in Wounding from PMID: 30772301 | SOX2 |
| 3960 HOMER2   | SOX2 regulated genes in Wounding from PMID: 30772301 | SOX2 |
| 3961 MTHFSD   | SOX2 regulated genes in Wounding from PMID: 30772301 | SOX2 |
| 3962 RIPK2    | SOX2 regulated genes in Wounding from PMID: 30772301 | SOX2 |
| 3963 RPL27    | SOX2 regulated genes in Wounding from PMID: 30772301 | SOX2 |

|               |                                                      |      |
|---------------|------------------------------------------------------|------|
| 3964 MACC1    | SOX2 regulated genes in Wounding from PMID: 30772301 | SOX2 |
| 3965 PAK4     | SOX2 regulated genes in Wounding from PMID: 30772301 | SOX2 |
| 3966 FMNL2    | SOX2 regulated genes in Wounding from PMID: 30772301 | SOX2 |
| 3967 LTV1     | SOX2 regulated genes in Wounding from PMID: 30772301 | SOX2 |
| 3968 FBXO42   | SOX2 regulated genes in Wounding from PMID: 30772301 | SOX2 |
| 3969 PRKCA    | SOX2 regulated genes in Wounding from PMID: 30772301 | SOX2 |
| 3970 CMAS     | SOX2 regulated genes in Wounding from PMID: 30772301 | SOX2 |
| 3971 CTNNA1   | SOX2 regulated genes in Wounding from PMID: 30772301 | SOX2 |
| 3972 KLHL32   | SOX2 regulated genes in Wounding from PMID: 30772301 | SOX2 |
| 3973 SNTB1    | SOX2 regulated genes in Wounding from PMID: 30772301 | SOX2 |
| 3974 ANKRD27  | SOX2 regulated genes in Wounding from PMID: 30772301 | SOX2 |
| 3975 PHACTR4  | SOX2 regulated genes in Wounding from PMID: 30772301 | SOX2 |
| 3976 SORCS2   | SOX2 regulated genes in Wounding from PMID: 30772301 | SOX2 |
| 3977 SLC9A2   | SOX2 regulated genes in Wounding from PMID: 30772301 | SOX2 |
| 3978 AIG1     | SOX2 regulated genes in Wounding from PMID: 30772301 | SOX2 |
| 3979 CALD1    | SOX2 regulated genes in Wounding from PMID: 30772301 | SOX2 |
| 3980 LRP8     | SOX2 regulated genes in Wounding from PMID: 30772301 | SOX2 |
| 3981 PEX26    | SOX2 regulated genes in Wounding from PMID: 30772301 | SOX2 |
| 3982 MICAL1   | SOX2 regulated genes in Wounding from PMID: 30772301 | SOX2 |
| 3983 HSPB1    | SOX2 regulated genes in Wounding from PMID: 30772301 | SOX2 |
| 3984 AQP9     | SOX2 regulated genes in Wounding from PMID: 30772301 | SOX2 |
| 3985 ZNF428   | SOX2 regulated genes in Wounding from PMID: 30772301 | SOX2 |
| 3986 DUSP8    | SOX2 regulated genes in Wounding from PMID: 30772301 | SOX2 |
| 3987 UBLCP1   | SOX2 regulated genes in Wounding from PMID: 30772301 | SOX2 |
| 3988 PERP     | SOX2 regulated genes in Wounding from PMID: 30772301 | SOX2 |
| 3989 CCT2     | SOX2 regulated genes in Wounding from PMID: 30772301 | SOX2 |
| 3990 ATAD2B   | SOX2 regulated genes in Wounding from PMID: 30772301 | SOX2 |
| 3991 NCK2     | SOX2 regulated genes in Wounding from PMID: 30772301 | SOX2 |
| 3992 PLB1     | SOX2 regulated genes in Wounding from PMID: 30772301 | SOX2 |
| 3993 DACT2    | SOX2 regulated genes in Wounding from PMID: 30772301 | SOX2 |
| 3994 PPP2CA   | SOX2 regulated genes in Wounding from PMID: 30772301 | SOX2 |
| 3995 KRT73    | SOX2 regulated genes in Wounding from PMID: 30772301 | SOX2 |
| 3996 RAB5A    | SOX2 regulated genes in Wounding from PMID: 30772301 | SOX2 |
| 3997 CD82     | SOX2 regulated genes in Wounding from PMID: 30772301 | SOX2 |
| 3998 ITPKC    | SOX2 regulated genes in Wounding from PMID: 30772301 | SOX2 |
| 3999 NUP62    | SOX2 regulated genes in Wounding from PMID: 30772301 | SOX2 |
| 4000 GJA3     | SOX2 regulated genes in Wounding from PMID: 30772301 | SOX2 |
| 4001 FBXO30   | SOX2 regulated genes in Wounding from PMID: 30772301 | SOX2 |
| 4002 RNF6     | SOX2 regulated genes in Wounding from PMID: 30772301 | SOX2 |
| 4003 ARHGEF19 | SOX2 regulated genes in Wounding from PMID: 30772301 | SOX2 |
| 4004 TSPAN8   | SOX2 regulated genes in Wounding from PMID: 30772301 | SOX2 |
| 4005 DLX3     | SOX2 regulated genes in Wounding from PMID: 30772301 | SOX2 |
| 4006 KRT75    | SOX2 regulated genes in Wounding from PMID: 30772301 | SOX2 |
| 4007 MAP3K9   | SOX2 regulated genes in Wounding from PMID: 30772301 | SOX2 |
| 4008 NECTIN1  | SOX2 regulated genes in Wounding from PMID: 30772301 | SOX2 |
| 4009 SUDS3    | SOX2 regulated genes in Wounding from PMID: 30772301 | SOX2 |
| 4010 MSI1     | SOX2 regulated genes in Wounding from PMID: 30772301 | SOX2 |
| 4011 SARNP    | SOX2 regulated genes in Wounding from PMID: 30772301 | SOX2 |
| 4012 ASH2L    | SOX2 regulated genes in Wounding from PMID: 30772301 | SOX2 |
| 4013 EPB41L4B | SOX2 regulated genes in Wounding from PMID: 30772301 | SOX2 |
| 4014 ERCC1    | SOX2 regulated genes in Wounding from PMID: 30772301 | SOX2 |
| 4015 IER3     | SOX2 regulated genes in Wounding from PMID: 30772301 | SOX2 |
| 4016 TFAP2A   | SOX2 regulated genes in Wounding from PMID: 30772301 | SOX2 |
| 4017 PRSS53   | SOX2 regulated genes in Wounding from PMID: 30772301 | SOX2 |
| 4018 CDH6     | SOX2 regulated genes in Wounding from PMID: 30772301 | SOX2 |
| 4019 CAV2     | SOX2 regulated genes in Wounding from PMID: 30772301 | SOX2 |
| 4020 BCAS1    | SOX2 regulated genes in Wounding from PMID: 30772301 | SOX2 |
| 4021 BDKRB2   | SOX2 regulated genes in Wounding from PMID: 30772301 | SOX2 |
| 4022 MYCBP    | SOX2 regulated genes in Wounding from PMID: 30772301 | SOX2 |
| 4023 STOX2    | SOX2 regulated genes in Wounding from PMID: 30772301 | SOX2 |
| 4024 NUP107   | SOX2 regulated genes in Wounding from PMID: 30772301 | SOX2 |

|               |                                                      |      |
|---------------|------------------------------------------------------|------|
| 4025 RAI14    | SOX2 regulated genes in Wounding from PMID: 30772301 | SOX2 |
| 4026 TMEM74   | SOX2 regulated genes in Wounding from PMID: 30772301 | SOX2 |
| 4027 NOXA1    | SOX2 regulated genes in Wounding from PMID: 30772301 | SOX2 |
| 4028 TMEM115  | SOX2 regulated genes in Wounding from PMID: 30772301 | SOX2 |
| 4029 UBA3     | SOX2 regulated genes in Wounding from PMID: 30772301 | SOX2 |
| 4030 INHBB    | SOX2 regulated genes in Wounding from PMID: 30772301 | SOX2 |
| 4031 EPHA2    | SOX2 regulated genes in Wounding from PMID: 30772301 | SOX2 |
| 4032 CPT1A    | SOX2 regulated genes in Wounding from PMID: 30772301 | SOX2 |
| 4033 UBXN2A   | SOX2 regulated genes in Wounding from PMID: 30772301 | SOX2 |
| 4034 MICALL1  | SOX2 regulated genes in Wounding from PMID: 30772301 | SOX2 |
| 4035 CPM      | SOX2 regulated genes in Wounding from PMID: 30772301 | SOX2 |
| 4036 STEAP1B  | SOX2 regulated genes in Wounding from PMID: 30772301 | SOX2 |
| 4037 BAG3     | SOX2 regulated genes in Wounding from PMID: 30772301 | SOX2 |
| 4038 DCAF12   | SOX2 regulated genes in Wounding from PMID: 30772301 | SOX2 |
| 4039 CTNNBIP1 | SOX2 regulated genes in Wounding from PMID: 30772301 | SOX2 |
| 4040 KDM8     | SOX2 regulated genes in Wounding from PMID: 30772301 | SOX2 |
| 4041 MANF     | SOX2 regulated genes in Wounding from PMID: 30772301 | SOX2 |
| 4042 PITPNB   | SOX2 regulated genes in Wounding from PMID: 30772301 | SOX2 |
| 4043 APOL3    | SOX2 regulated genes in Wounding from PMID: 30772301 | SOX2 |
| 4044 APOL4    | SOX2 regulated genes in Wounding from PMID: 30772301 | SOX2 |
| 4045 APOL2    | SOX2 regulated genes in Wounding from PMID: 30772301 | SOX2 |
| 4046 APOL1    | SOX2 regulated genes in Wounding from PMID: 30772301 | SOX2 |
| 4047 RCOR2    | SOX2 regulated genes in Wounding from PMID: 30772301 | SOX2 |
| 4048 ARPP19   | SOX2 regulated genes in Wounding from PMID: 30772301 | SOX2 |
| 4049 ECHDC2   | SOX2 regulated genes in Wounding from PMID: 30772301 | SOX2 |
| 4050 HAPLN4   | SOX2 regulated genes in Wounding from PMID: 30772301 | SOX2 |
| 4051 PPIF     | SOX2 regulated genes in Wounding from PMID: 30772301 | SOX2 |
| 4052 SRBD1    | SOX2 regulated genes in Wounding from PMID: 30772301 | SOX2 |
| 4053 LRRC42   | SOX2 regulated genes in Wounding from PMID: 30772301 | SOX2 |
| 4054 ESM1     | SOX2 regulated genes in Wounding from PMID: 30772301 | SOX2 |
| 4055 PITRM1   | SOX2 regulated genes in Wounding from PMID: 30772301 | SOX2 |
| 4056 METAP1D  | SOX2 regulated genes in Wounding from PMID: 30772301 | SOX2 |
| 4057 MAP2K3   | SOX2 regulated genes in Wounding from PMID: 30772301 | SOX2 |
| 4058 RFXANK   | SOX2 regulated genes in Wounding from PMID: 30772301 | SOX2 |
| 4059 TP53     | SOX2 regulated genes in Wounding from PMID: 30772301 | SOX2 |
| 4060 NR2C2AP  | SOX2 regulated genes in Wounding from PMID: 30772301 | SOX2 |
| 4061 AGAP1    | SOX2 regulated genes in Wounding from PMID: 30772301 | SOX2 |
| 4062 SNAI3    | SOX2 regulated genes in Wounding from PMID: 30772301 | SOX2 |
| 4063 NCBP2L   | SOX2 regulated genes in Wounding from PMID: 30772301 | SOX2 |
| 4064 SYCE1L   | SOX2 regulated genes in Wounding from PMID: 30772301 | SOX2 |
| 4065 TENM2    | SOX2 regulated genes in Wounding from PMID: 30772301 | SOX2 |
| 4066 DYNC1L1  | SOX2 regulated genes in Wounding from PMID: 30772301 | SOX2 |
| 4067 HOXC13   | SOX2 regulated genes in Wounding from PMID: 30772301 | SOX2 |
| 4068 LEF1     | SOX2 regulated genes in Wounding from PMID: 30772301 | SOX2 |
| 4069 STAM2    | SOX2 regulated genes in Wounding from PMID: 30772301 | SOX2 |
| 4070 EPB41L5  | SOX2 regulated genes in Wounding from PMID: 30772301 | SOX2 |
| 4071 METTL1   | SOX2 regulated genes in Wounding from PMID: 30772301 | SOX2 |
| 4072 MYZAP    | SOX2 regulated genes in Wounding from PMID: 30772301 | SOX2 |
| 4073 LMO4     | SOX2 regulated genes in Wounding from PMID: 30772301 | SOX2 |
| 4074 MSRB3    | SOX2 regulated genes in Wounding from PMID: 30772301 | SOX2 |
| 4075 DMBT1    | SOX2 regulated genes in Wounding from PMID: 30772301 | SOX2 |
| 4076 UPK1B    | SOX2 regulated genes in Wounding from PMID: 30772301 | SOX2 |
| 4077 MYRF     | SOX2 regulated genes in Wounding from PMID: 30772301 | SOX2 |
| 4078 FASTKD5  | SOX2 regulated genes in Wounding from PMID: 30772301 | SOX2 |
| 4079 PROM2    | SOX2 regulated genes in Wounding from PMID: 30772301 | SOX2 |
| 4080 FRMPD1   | SOX2 regulated genes in Wounding from PMID: 30772301 | SOX2 |
| 4081 KANK1    | SOX2 regulated genes in Wounding from PMID: 30772301 | SOX2 |
| 4082 RHCG     | SOX2 regulated genes in Wounding from PMID: 30772301 | SOX2 |
| 4083 GRPEL2   | SOX2 regulated genes in Wounding from PMID: 30772301 | SOX2 |
| 4084 MX11     | SOX2 regulated genes in Wounding from PMID: 30772301 | SOX2 |
| 4085 SGTB     | SOX2 regulated genes in Wounding from PMID: 30772301 | SOX2 |

|                |                                                      |      |
|----------------|------------------------------------------------------|------|
| 4086 WNK4      | SOX2 regulated genes in Wounding from PMID: 30772301 | SOX2 |
| 4087 MUS81     | SOX2 regulated genes in Wounding from PMID: 30772301 | SOX2 |
| 4088 EIF3J     | SOX2 regulated genes in Wounding from PMID: 30772301 | SOX2 |
| 4089 VCL       | SOX2 regulated genes in Wounding from PMID: 30772301 | SOX2 |
| 4090 HOXB6     | SOX2 regulated genes in Wounding from PMID: 30772301 | SOX2 |
| 4091 KMT5B     | SOX2 regulated genes in Wounding from PMID: 30772301 | SOX2 |
| 4092 SRPRA     | SOX2 regulated genes in Wounding from PMID: 30772301 | SOX2 |
| 4093 RBM18     | SOX2 regulated genes in Wounding from PMID: 30772301 | SOX2 |
| 4094 HSPA5     | SOX2 regulated genes in Wounding from PMID: 30772301 | SOX2 |
| 4095 USO1      | SOX2 regulated genes in Wounding from PMID: 30772301 | SOX2 |
| 4096 PHTF2     | SOX2 regulated genes in Wounding from PMID: 30772301 | SOX2 |
| 4097 SERPINA11 | SOX2 regulated genes in Wounding from PMID: 30772301 | SOX2 |
| 4098 PDCL3     | SOX2 regulated genes in Wounding from PMID: 30772301 | SOX2 |
| 4099 PCYOX1L   | SOX2 regulated genes in Wounding from PMID: 30772301 | SOX2 |
| 4100 SLCO5A1   | SOX2 regulated genes in Wounding from PMID: 30772301 | SOX2 |
| 4101 SLC27A1   | SOX2 regulated genes in Wounding from PMID: 30772301 | SOX2 |
| 4102 AK4       | SOX2 regulated genes in Wounding from PMID: 30772301 | SOX2 |
| 4103 IL1B      | SOX2 regulated genes in Wounding from PMID: 30772301 | SOX2 |
| 4104 MPZL2     | SOX2 regulated genes in Wounding from PMID: 30772301 | SOX2 |
| 4105 MAS1      | SOX2 regulated genes in Wounding from PMID: 30772301 | SOX2 |
| 4106 TNFRSF11B | SOX2 regulated genes in Wounding from PMID: 30772301 | SOX2 |
| 4107 TECTA     | SOX2 regulated genes in Wounding from PMID: 30772301 | SOX2 |
| 4108 CAPN1     | SOX2 regulated genes in Wounding from PMID: 30772301 | SOX2 |
| 4109 CNKSR3    | SOX2 regulated genes in Wounding from PMID: 30772301 | SOX2 |
| 4110 UBE2H     | SOX2 regulated genes in Wounding from PMID: 30772301 | SOX2 |
| 4111 SIAH1     | SOX2 regulated genes in Wounding from PMID: 30772301 | SOX2 |
| 4112 TRIM2     | SOX2 regulated genes in Wounding from PMID: 30772301 | SOX2 |
| 4113 CD164L2   | SOX2 regulated genes in Wounding from PMID: 30772301 | SOX2 |
| 4114 ATP1B3    | SOX2 regulated genes in Wounding from PMID: 30772301 | SOX2 |
| 4115 SEC24C    | SOX2 regulated genes in Wounding from PMID: 30772301 | SOX2 |
| 4116 CTTN      | SOX2 regulated genes in Wounding from PMID: 30772301 | SOX2 |
| 4117 IFFO2     | SOX2 regulated genes in Wounding from PMID: 30772301 | SOX2 |
| 4118 GDPD3     | SOX2 regulated genes in Wounding from PMID: 30772301 | SOX2 |
| 4119 PRICKLE2  | SOX2 regulated genes in Wounding from PMID: 30772301 | SOX2 |
| 4120 GCSH      | SOX2 regulated genes in Wounding from PMID: 30772301 | SOX2 |
| 4121 COQ5      | SOX2 regulated genes in Wounding from PMID: 30772301 | SOX2 |
| 4122 OAF       | SOX2 regulated genes in Wounding from PMID: 30772301 | SOX2 |
| 4123 PWWP2B    | SOX2 regulated genes in Wounding from PMID: 30772301 | SOX2 |
| 4124 HADHB     | SOX2 regulated genes in Wounding from PMID: 30772301 | SOX2 |
| 4125 PLEKHH1   | SOX2 regulated genes in Wounding from PMID: 30772301 | SOX2 |
| 4126 ELL2      | SOX2 regulated genes in Wounding from PMID: 30772301 | SOX2 |
| 4127 PSORS1C2  | SOX2 regulated genes in Wounding from PMID: 30772301 | SOX2 |
| 4128 ABHD17C   | SOX2 regulated genes in Wounding from PMID: 30772301 | SOX2 |
| 4129 ELF5      | SOX2 regulated genes in Wounding from PMID: 30772301 | SOX2 |
| 4130 TM4SF1    | SOX2 regulated genes in Wounding from PMID: 30772301 | SOX2 |
| 4131 EIF3L     | SOX2 regulated genes in Wounding from PMID: 30772301 | SOX2 |
| 4132 EIF3D     | SOX2 regulated genes in Wounding from PMID: 30772301 | SOX2 |
| 4133 C10orf95  | SOX2 regulated genes in Wounding from PMID: 30772301 | SOX2 |
| 4134 LYPD5     | SOX2 regulated genes in Wounding from PMID: 30772301 | SOX2 |
| 4135 C11orf80  | SOX2 regulated genes in Wounding from PMID: 30772301 | SOX2 |
| 4136 MAPK3     | SOX2 regulated genes in Wounding from PMID: 30772301 | SOX2 |
| 4137 PTK7      | SOX2 regulated genes in Wounding from PMID: 30772301 | SOX2 |
| 4138 INHBA     | SOX2 regulated genes in Wounding from PMID: 30772301 | SOX2 |
| 4139 SNIP1     | SOX2 regulated genes in Wounding from PMID: 30772301 | SOX2 |
| 4140 EIF5AL1   | SOX2 regulated genes in Wounding from PMID: 30772301 | SOX2 |
| 4141 RAB21     | SOX2 regulated genes in Wounding from PMID: 30772301 | SOX2 |
| 4142 ACTN1     | SOX2 regulated genes in Wounding from PMID: 30772301 | SOX2 |
| 4143 NIPAL1    | SOX2 regulated genes in Wounding from PMID: 30772301 | SOX2 |
| 4144 ICMT      | SOX2 regulated genes in Wounding from PMID: 30772301 | SOX2 |
| 4145 SARDH     | SOX2 regulated genes in Wounding from PMID: 30772301 | SOX2 |
| 4146 RDH10     | SOX2 regulated genes in Wounding from PMID: 30772301 | SOX2 |

|                      |                                                      |      |
|----------------------|------------------------------------------------------|------|
| 4147 KIF26A          | SOX2 regulated genes in Wounding from PMID: 30772301 | SOX2 |
| 4148 RAB15           | SOX2 regulated genes in Wounding from PMID: 30772301 | SOX2 |
| 4149 LINC02210-CRHR1 | SOX2 regulated genes in Wounding from PMID: 30772301 | SOX2 |
| 4150 TCP1            | SOX2 regulated genes in Wounding from PMID: 30772301 | SOX2 |
| 4151 SOX9            | SOX2 regulated genes in Wounding from PMID: 30772301 | SOX2 |
| 4152 FGFR3           | SOX2 regulated genes in Wounding from PMID: 30772301 | SOX2 |
| 4153 ANXA8           | SOX2 regulated genes in Wounding from PMID: 30772301 | SOX2 |
| 4154 ANXA8L1         | SOX2 regulated genes in Wounding from PMID: 30772301 | SOX2 |
| 4155 PTPRK           | SOX2 regulated genes in Wounding from PMID: 30772301 | SOX2 |
| 4156 SEC11A          | SOX2 regulated genes in Wounding from PMID: 30772301 | SOX2 |
| 4157 PTGR1           | SOX2 regulated genes in Wounding from PMID: 30772301 | SOX2 |
| 4158 CNTFR           | SOX2 regulated genes in Wounding from PMID: 30772301 | SOX2 |
| 4159 ACTB            | SOX2 regulated genes in Wounding from PMID: 30772301 | SOX2 |
| 4160 TMEM39A         | SOX2 regulated genes in Wounding from PMID: 30772301 | SOX2 |
| 4161 SFRP1           | SOX2 regulated genes in Wounding from PMID: 30772301 | SOX2 |
| 4162 EPHB6           | SOX2 regulated genes in Wounding from PMID: 30772301 | SOX2 |
| 4163 PIGH            | SOX2 regulated genes in Wounding from PMID: 30772301 | SOX2 |
| 4164 ZFAND6          | SOX2 regulated genes in Wounding from PMID: 30772301 | SOX2 |
| 4165 NECTIN3         | SOX2 regulated genes in Wounding from PMID: 30772301 | SOX2 |
| 4166 DOK4            | SOX2 regulated genes in Wounding from PMID: 30772301 | SOX2 |
| 4167 NRARP           | SOX2 regulated genes in Wounding from PMID: 30772301 | SOX2 |
| 4168 NTN4            | SOX2 regulated genes in Wounding from PMID: 30772301 | SOX2 |
| 4169 TSFM            | SOX2 regulated genes in Wounding from PMID: 30772301 | SOX2 |
| 4170 CXXC5           | SOX2 regulated genes in Wounding from PMID: 30772301 | SOX2 |
| 4171 COPB1           | SOX2 regulated genes in Wounding from PMID: 30772301 | SOX2 |
| 4172 SCNN1B          | SOX2 regulated genes in Wounding from PMID: 30772301 | SOX2 |
| 4173 FAF2            | SOX2 regulated genes in Wounding from PMID: 30772301 | SOX2 |
| 4174 ACTR1A          | SOX2 regulated genes in Wounding from PMID: 30772301 | SOX2 |
| 4175 CLCF1           | SOX2 regulated genes in Wounding from PMID: 30772301 | SOX2 |
| 4176 CPEB2           | SOX2 regulated genes in Wounding from PMID: 30772301 | SOX2 |
| 4177 MAL             | SOX2 regulated genes in Wounding from PMID: 30772301 | SOX2 |
| 4178 RALA            | SOX2 regulated genes in Wounding from PMID: 30772301 | SOX2 |
| 4179 MOB1B           | SOX2 regulated genes in Wounding from PMID: 30772301 | SOX2 |
| 4180 UBA1            | SOX2 regulated genes in Wounding from PMID: 30772301 | SOX2 |
| 4181 EVA1A           | SOX2 regulated genes in Wounding from PMID: 30772301 | SOX2 |
| 4182 VGLL3           | SOX2 regulated genes in Wounding from PMID: 30772301 | SOX2 |
| 4183 LBH             | SOX2 regulated genes in Wounding from PMID: 30772301 | SOX2 |
| 4184 C6orf132        | SOX2 regulated genes in Wounding from PMID: 30772301 | SOX2 |
| 4185 CAND1           | SOX2 regulated genes in Wounding from PMID: 30772301 | SOX2 |
| 4186 NUP35           | SOX2 regulated genes in Wounding from PMID: 30772301 | SOX2 |
| 4187 SNRPA           | SOX2 regulated genes in Wounding from PMID: 30772301 | SOX2 |
| 4188 FOSL1           | SOX2 regulated genes in Wounding from PMID: 30772301 | SOX2 |
| 4189 PLPP5           | SOX2 regulated genes in Wounding from PMID: 30772301 | SOX2 |
| 4190 DLX4            | SOX2 regulated genes in Wounding from PMID: 30772301 | SOX2 |
| 4191 BRAP            | SOX2 regulated genes in Wounding from PMID: 30772301 | SOX2 |
| 4192 HS6ST1          | SOX2 regulated genes in Wounding from PMID: 30772301 | SOX2 |
| 4193 GPC4            | SOX2 regulated genes in Wounding from PMID: 30772301 | SOX2 |
| 4194 DPYSL5          | SOX2 regulated genes in Wounding from PMID: 30772301 | SOX2 |
| 4195 PPFIA3          | SOX2 regulated genes in Wounding from PMID: 30772301 | SOX2 |
| 4196 MMP1            | SOX2 regulated genes in Wounding from PMID: 30772301 | SOX2 |
| 4197 ATP6V1A         | SOX2 regulated genes in Wounding from PMID: 30772301 | SOX2 |
| 4198 SMNDC1          | SOX2 regulated genes in Wounding from PMID: 30772301 | SOX2 |
| 4199 TMEM121         | SOX2 regulated genes in Wounding from PMID: 30772301 | SOX2 |
| 4200 GJB4            | SOX2 regulated genes in Wounding from PMID: 30772301 | SOX2 |
| 4201 HNRNPAB         | SOX2 regulated genes in Wounding from PMID: 30772301 | SOX2 |
| 4202 BSPRY           | SOX2 regulated genes in Wounding from PMID: 30772301 | SOX2 |
| 4203 BRD1            | SOX2 regulated genes in Wounding from PMID: 30772301 | SOX2 |
| 4204 SUFU            | SOX2 regulated genes in Wounding from PMID: 30772301 | SOX2 |
| 4205 TLE2            | SOX2 regulated genes in Wounding from PMID: 30772301 | SOX2 |
| 4206 ARHGAP39        | SOX2 regulated genes in Wounding from PMID: 30772301 | SOX2 |
| 4207 EFNA2           | SOX2 regulated genes in Wounding from PMID: 30772301 | SOX2 |

|                |                                                      |      |
|----------------|------------------------------------------------------|------|
| 4208 ZNF821    | SOX2 regulated genes in Wounding from PMID: 30772301 | SOX2 |
| 4209 FGF19     | SOX2 regulated genes in Wounding from PMID: 30772301 | SOX2 |
| 4210 IL11RA    | SOX2 regulated genes in Wounding from PMID: 30772301 | SOX2 |
| 4211 MYADM     | SOX2 regulated genes in Wounding from PMID: 30772301 | SOX2 |
| 4212 UPF1      | SOX2 regulated genes in Wounding from PMID: 30772301 | SOX2 |
| 4213 PLCD3     | SOX2 regulated genes in Wounding from PMID: 30772301 | SOX2 |
| 4214 PRDX2     | SOX2 regulated genes in Wounding from PMID: 30772301 | SOX2 |
| 4215 ATP2B4    | SOX2 regulated genes in Wounding from PMID: 30772301 | SOX2 |
| 4216 MRTO4     | SOX2 regulated genes in Wounding from PMID: 30772301 | SOX2 |
| 4217 UNC119B   | SOX2 regulated genes in Wounding from PMID: 30772301 | SOX2 |
| 4218 PLA2G2F   | SOX2 regulated genes in Wounding from PMID: 30772301 | SOX2 |
| 4219 ODC1      | SOX2 regulated genes in Wounding from PMID: 30772301 | SOX2 |
| 4220 FLNB      | SOX2 regulated genes in Wounding from PMID: 30772301 | SOX2 |
| 4221 SPTSSB    | SOX2 regulated genes in Wounding from PMID: 30772301 | SOX2 |
| 4222 MAP6D1    | SOX2 regulated genes in Wounding from PMID: 30772301 | SOX2 |
| 4223 YOD1      | SOX2 regulated genes in Wounding from PMID: 30772301 | SOX2 |
| 4224 PDIA4     | SOX2 regulated genes in Wounding from PMID: 30772301 | SOX2 |
| 4225 GNG4      | SOX2 regulated genes in Wounding from PMID: 30772301 | SOX2 |
| 4226 MTA2      | SOX2 regulated genes in Wounding from PMID: 30772301 | SOX2 |
| 4227 B3GNT3    | SOX2 regulated genes in Wounding from PMID: 30772301 | SOX2 |
| 4228 KRT17     | SOX2 regulated genes in Wounding from PMID: 30772301 | SOX2 |
| 4229 DDB1      | SOX2 regulated genes in Wounding from PMID: 30772301 | SOX2 |
| 4230 CGN       | SOX2 regulated genes in Wounding from PMID: 30772301 | SOX2 |
| 4231 CD44      | SOX2 regulated genes in Wounding from PMID: 30772301 | SOX2 |
| 4232 CHTF8     | SOX2 regulated genes in Wounding from PMID: 30772301 | SOX2 |
| 4233 VAMP8     | SOX2 regulated genes in Wounding from PMID: 30772301 | SOX2 |
| 4234 POR       | SOX2 regulated genes in Wounding from PMID: 30772301 | SOX2 |
| 4235 ARHGAP21  | SOX2 regulated genes in Wounding from PMID: 30772301 | SOX2 |
| 4236 SOX13     | SOX2 regulated genes in Wounding from PMID: 30772301 | SOX2 |
| 4237 COBLL1    | SOX2 regulated genes in Wounding from PMID: 30772301 | SOX2 |
| 4238 ARL15     | SOX2 regulated genes in Wounding from PMID: 30772301 | SOX2 |
| 4239 CCSER1    | SOX2 regulated genes in Wounding from PMID: 30772301 | SOX2 |
| 4240 CHDH      | SOX2 regulated genes in Wounding from PMID: 30772301 | SOX2 |
| 4241 PAFAH1B1  | SOX2 regulated genes in Wounding from PMID: 30772301 | SOX2 |
| 4242 SNTB2     | SOX2 regulated genes in Wounding from PMID: 30772301 | SOX2 |
| 4243 RNF40     | SOX2 regulated genes in Wounding from PMID: 30772301 | SOX2 |
| 4244 SS18L2    | SOX2 regulated genes in Wounding from PMID: 30772301 | SOX2 |
| 4245 KLK10     | SOX2 regulated genes in Wounding from PMID: 30772301 | SOX2 |
| 4246 CYB561D1  | SOX2 regulated genes in Wounding from PMID: 30772301 | SOX2 |
| 4247 MYO18A    | SOX2 regulated genes in Wounding from PMID: 30772301 | SOX2 |
| 4248 CDH3      | SOX2 regulated genes in Wounding from PMID: 30772301 | SOX2 |
| 4249 HNRNPM    | SOX2 regulated genes in Wounding from PMID: 30772301 | SOX2 |
| 4250 ZNF608    | SOX2 regulated genes in Wounding from PMID: 30772301 | SOX2 |
| 4251 ATG4B     | SOX2 regulated genes in Wounding from PMID: 30772301 | SOX2 |
| 4252 CDK18     | SOX2 regulated genes in Wounding from PMID: 30772301 | SOX2 |
| 4253 HDAC5     | SOX2 regulated genes in Wounding from PMID: 30772301 | SOX2 |
| 4254 SNX7      | SOX2 regulated genes in Wounding from PMID: 30772301 | SOX2 |
| 4255 METTL16   | SOX2 regulated genes in Wounding from PMID: 30772301 | SOX2 |
| 4256 GBP6      | SOX2 regulated genes in Wounding from PMID: 30772301 | SOX2 |
| 4257 KPNA4     | SOX2 regulated genes in Wounding from PMID: 30772301 | SOX2 |
| 4258 CSNK1A1   | SOX2 regulated genes in Wounding from PMID: 30772301 | SOX2 |
| 4259 BLZF1     | SOX2 regulated genes in Wounding from PMID: 30772301 | SOX2 |
| 4260 PADI1     | SOX2 regulated genes in Wounding from PMID: 30772301 | SOX2 |
| 4261 TLN2      | SOX2 regulated genes in Wounding from PMID: 30772301 | SOX2 |
| 4262 KRTAP2-3  | SOX2 regulated genes in Wounding from PMID: 30772301 | SOX2 |
| 4263 KRTAP4-11 | SOX2 regulated genes in Wounding from PMID: 30772301 | SOX2 |
| 4264 KRTAP4-8  | SOX2 regulated genes in Wounding from PMID: 30772301 | SOX2 |
| 4265 CAPN12    | SOX2 regulated genes in Wounding from PMID: 30772301 | SOX2 |
| 4266 SPAG9     | SOX2 regulated genes in Wounding from PMID: 30772301 | SOX2 |
| 4267 TJP1      | SOX2 regulated genes in Wounding from PMID: 30772301 | SOX2 |
| 4268 C1orf52   | SOX2 regulated genes in Wounding from PMID: 30772301 | SOX2 |



|               |                                                      |      |
|---------------|------------------------------------------------------|------|
| 4269 APLP2    | SOX2 regulated genes in Wounding from PMID: 30772301 | SOX2 |
| 4270 PTPN14   | SOX2 regulated genes in Wounding from PMID: 30772301 | SOX2 |
| 4271 ACBD3    | SOX2 regulated genes in Wounding from PMID: 30772301 | SOX2 |
| 4272 PDE4B    | SOX2 regulated genes in Wounding from PMID: 30772301 | SOX2 |
| 4273 PSPN     | SOX2 regulated genes in Wounding from PMID: 30772301 | SOX2 |
| 4274 HYOU1    | SOX2 regulated genes in Wounding from PMID: 30772301 | SOX2 |
| 4275 CREB3L4  | SOX2 regulated genes in Wounding from PMID: 30772301 | SOX2 |
| 4276 EDN2     | SOX2 regulated genes in Wounding from PMID: 30772301 | SOX2 |
| 4277 CHFR     | SOX2 regulated genes in Wounding from PMID: 30772301 | SOX2 |
| 4278 WDR12    | SOX2 regulated genes in Wounding from PMID: 30772301 | SOX2 |
| 4279 SLC40A1  | SOX2 regulated genes in Wounding from PMID: 30772301 | SOX2 |
| 4280 MICA     | SOX2 regulated genes in Wounding from PMID: 30772301 | SOX2 |
| 4281 CDV3     | SOX2 regulated genes in Wounding from PMID: 30772301 | SOX2 |
| 4282 FZD7     | SOX2 regulated genes in Wounding from PMID: 30772301 | SOX2 |
| 4283 CALR     | SOX2 regulated genes in Wounding from PMID: 30772301 | SOX2 |
| 4284 SPRR3    | SOX2 regulated genes in Wounding from PMID: 30772301 | SOX2 |
| 4285 TRAPPC4  | SOX2 regulated genes in Wounding from PMID: 30772301 | SOX2 |
| 4286 CLEC2D   | SOX2 regulated genes in Wounding from PMID: 30772301 | SOX2 |
| 4287 DENND2C  | SOX2 regulated genes in Wounding from PMID: 30772301 | SOX2 |
| 4288 FXD4     | SOX2 regulated genes in Wounding from PMID: 30772301 | SOX2 |
| 4289 MAST4    | SOX2 regulated genes in Wounding from PMID: 30772301 | SOX2 |
| 4290 MEN1     | SOX2 regulated genes in Wounding from PMID: 30772301 | SOX2 |
| 4291 PRDM4    | SOX2 regulated genes in Wounding from PMID: 30772301 | SOX2 |
| 4292 BAH1     | SOX2 regulated genes in Wounding from PMID: 30772301 | SOX2 |
| 4293 UBQLN4   | SOX2 regulated genes in Wounding from PMID: 30772301 | SOX2 |
| 4294 CELSR2   | SOX2 regulated genes in Wounding from PMID: 30772301 | SOX2 |
| 4295 TSEN2    | SOX2 regulated genes in Wounding from PMID: 30772301 | SOX2 |
| 4296 PRPF31   | SOX2 regulated genes in Wounding from PMID: 30772301 | SOX2 |
| 4297 EPS8L2   | SOX2 regulated genes in Wounding from PMID: 30772301 | SOX2 |
| 4298 IGSF9    | SOX2 regulated genes in Wounding from PMID: 30772301 | SOX2 |
| 4299 SLC16A6  | SOX2 regulated genes in Wounding from PMID: 30772301 | SOX2 |
| 4300 GTF2B    | SOX2 regulated genes in Wounding from PMID: 30772301 | SOX2 |
| 4301 SH3TC2   | SOX2 regulated genes in Wounding from PMID: 30772301 | SOX2 |
| 4302 EPHA1    | SOX2 regulated genes in Wounding from PMID: 30772301 | SOX2 |
| 4303 MLF1     | SOX2 regulated genes in Wounding from PMID: 30772301 | SOX2 |
| 4304 RUVBL2   | SOX2 regulated genes in Wounding from PMID: 30772301 | SOX2 |
| 4305 MAP7     | SOX2 regulated genes in Wounding from PMID: 30772301 | SOX2 |
| 4306 MYO19    | SOX2 regulated genes in Wounding from PMID: 30772301 | SOX2 |
| 4307 SF1      | SOX2 regulated genes in Wounding from PMID: 30772301 | SOX2 |
| 4308 CTTNBP2  | SOX2 regulated genes in Wounding from PMID: 30772301 | SOX2 |
| 4309 KDF1     | SOX2 regulated genes in Wounding from PMID: 30772301 | SOX2 |
| 4310 PPL      | SOX2 regulated genes in Wounding from PMID: 30772301 | SOX2 |
| 4311 EFHD1    | SOX2 regulated genes in Wounding from PMID: 30772301 | SOX2 |
| 4312 GSTM3    | SOX2 regulated genes in Wounding from PMID: 30772301 | SOX2 |
| 4313 TIAM2    | SOX2 regulated genes in Wounding from PMID: 30772301 | SOX2 |
| 4314 CMPK1    | SOX2 regulated genes in Wounding from PMID: 30772301 | SOX2 |
| 4315 KRTAP1-5 | SOX2 regulated genes in Wounding from PMID: 30772301 | SOX2 |
| 4316 KRTAP1-3 | SOX2 regulated genes in Wounding from PMID: 30772301 | SOX2 |
| 4317 KRTAP1-1 | SOX2 regulated genes in Wounding from PMID: 30772301 | SOX2 |
| 4318 DNAJA4   | SOX2 regulated genes in Wounding from PMID: 30772301 | SOX2 |
| 4319 ERC2     | SOX2 regulated genes in Wounding from PMID: 30772301 | SOX2 |
| 4320 PPFIBP2  | SOX2 regulated genes in Wounding from PMID: 30772301 | SOX2 |
| 4321 INTS4    | SOX2 regulated genes in Wounding from PMID: 30772301 | SOX2 |
| 4322 S100A6   | SOX2 regulated genes in Wounding from PMID: 30772301 | SOX2 |
| 4323 MOB4     | SOX2 regulated genes in Wounding from PMID: 30772301 | SOX2 |
| 4324 KLC1     | SOX2 regulated genes in Wounding from PMID: 30772301 | SOX2 |
| 4325 LSR      | SOX2 regulated genes in Wounding from PMID: 30772301 | SOX2 |
| 4326 CAPN8    | SOX2 regulated genes in Wounding from PMID: 30772301 | SOX2 |
| 4327 NHSL1    | SOX2 regulated genes in Wounding from PMID: 30772301 | SOX2 |
| 4328 HES2     | SOX2 regulated genes in Wounding from PMID: 30772301 | SOX2 |
| 4329 S100A16  | SOX2 regulated genes in Wounding from PMID: 30772301 | SOX2 |

|                 |                                                      |      |
|-----------------|------------------------------------------------------|------|
| 4330 PUM1       | SOX2 regulated genes in Wounding from PMID: 30772301 | SOX2 |
| 4331 PLXNA2     | SOX2 regulated genes in Wounding from PMID: 30772301 | SOX2 |
| 4332 PKD1L3     | SOX2 regulated genes in Wounding from PMID: 30772301 | SOX2 |
| 4333 UBE2G1     | SOX2 regulated genes in Wounding from PMID: 30772301 | SOX2 |
| 4334 NDEL1      | SOX2 regulated genes in Wounding from PMID: 30772301 | SOX2 |
| 4335 SGMS2      | SOX2 regulated genes in Wounding from PMID: 30772301 | SOX2 |
| 4336 IQGAP1     | SOX2 regulated genes in Wounding from PMID: 30772301 | SOX2 |
| 4337 NRDC       | SOX2 regulated genes in Wounding from PMID: 30772301 | SOX2 |
| 4338 CSGALNACT1 | SOX2 regulated genes in Wounding from PMID: 30772301 | SOX2 |
| 4339 LRRC8E     | SOX2 regulated genes in Wounding from PMID: 30772301 | SOX2 |
| 4340 GMCL1      | SOX2 regulated genes in Wounding from PMID: 30772301 | SOX2 |
| 4341 WNT11      | SOX2 regulated genes in Wounding from PMID: 30772301 | SOX2 |
| 4342 GALNT3     | SOX2 regulated genes in Wounding from PMID: 30772301 | SOX2 |
| 4343 PDLIM7     | SOX2 regulated genes in Wounding from PMID: 30772301 | SOX2 |
| 4344 WDR26      | SOX2 regulated genes in Wounding from PMID: 30772301 | SOX2 |
| 4345 OCLN       | SOX2 regulated genes in Wounding from PMID: 30772301 | SOX2 |
| 4346 FARP2      | SOX2 regulated genes in Wounding from PMID: 30772301 | SOX2 |
| 4347 RGS12      | SOX2 regulated genes in Wounding from PMID: 30772301 | SOX2 |
| 4348 TM4SF4     | SOX2 regulated genes in Wounding from PMID: 30772301 | SOX2 |
| 4349 CLIP1      | SOX2 regulated genes in Wounding from PMID: 30772301 | SOX2 |
| 4350 ADGRL3     | SOX2 regulated genes in Wounding from PMID: 30772301 | SOX2 |
| 4351 KRT34      | SOX2 regulated genes in Wounding from PMID: 30772301 | SOX2 |
| 4352 NKAPL      | SOX2 regulated genes in Wounding from PMID: 30772301 | SOX2 |
| 4353 BHLHE40    | SOX2 regulated genes in Wounding from PMID: 30772301 | SOX2 |
| 4354 NIPAL3     | SOX2 regulated genes in Wounding from PMID: 30772301 | SOX2 |
| 4355 KALRN      | SOX2 regulated genes in Wounding from PMID: 30772301 | SOX2 |
| 4356 ETV2       | SOX2 regulated genes in Wounding from PMID: 30772301 | SOX2 |
| 4357 B3GALNT2   | SOX2 regulated genes in Wounding from PMID: 30772301 | SOX2 |
| 4358 GTF2I      | SOX2 regulated genes in Wounding from PMID: 30772301 | SOX2 |
| 4359 HNRNPC     | SOX2 regulated genes in Wounding from PMID: 30772301 | SOX2 |
| 4360 HNRNPCL1   | SOX2 regulated genes in Wounding from PMID: 30772301 | SOX2 |
| 4361 HNRNPCL2   | SOX2 regulated genes in Wounding from PMID: 30772301 | SOX2 |
| 4362 LRIG1      | SOX2 regulated genes in Wounding from PMID: 30772301 | SOX2 |
| 4363 TRIM33     | SOX2 regulated genes in Wounding from PMID: 30772301 | SOX2 |
| 4364 SPNS2      | SOX2 regulated genes in Wounding from PMID: 30772301 | SOX2 |
| 4365 HAS3       | SOX2 regulated genes in Wounding from PMID: 30772301 | SOX2 |
| 4366 INSIG2     | SOX2 regulated genes in Wounding from PMID: 30772301 | SOX2 |
| 4367 BNIPL      | SOX2 regulated genes in Wounding from PMID: 30772301 | SOX2 |
| 4368 CETN3      | SOX2 regulated genes in Wounding from PMID: 30772301 | SOX2 |
| 4369 TRAK2      | SOX2 regulated genes in Wounding from PMID: 30772301 | SOX2 |
| 4370 MAST1      | SOX2 regulated genes in Wounding from PMID: 30772301 | SOX2 |
| 4371 NECTIN4    | SOX2 regulated genes in Wounding from PMID: 30772301 | SOX2 |
| 4372 ACTN4      | SOX2 regulated genes in Wounding from PMID: 30772301 | SOX2 |
| 4373 TNFAIP6    | SOX2 regulated genes in Wounding from PMID: 30772301 | SOX2 |
| 4374 TMBIM1     | SOX2 regulated genes in Wounding from PMID: 30772301 | SOX2 |
| 4375 CRNN       | SOX2 regulated genes in Wounding from PMID: 30772301 | SOX2 |
| 4376 SMIM5      | SOX2 regulated genes in Wounding from PMID: 30772301 | SOX2 |
| 4377 SIRT6      | SOX2 regulated genes in Wounding from PMID: 30772301 | SOX2 |
| 4378 FAM167A    | SOX2 regulated genes in Wounding from PMID: 30772301 | SOX2 |
| 4379 DNAJB2     | SOX2 regulated genes in Wounding from PMID: 30772301 | SOX2 |
| 4380 GOLT1B     | SOX2 regulated genes in Wounding from PMID: 30772301 | SOX2 |
| 4381 KLHL18     | SOX2 regulated genes in Wounding from PMID: 30772301 | SOX2 |
| 4382 ZYX        | SOX2 regulated genes in Wounding from PMID: 30772301 | SOX2 |
| 4383 ATXN1      | SOX2 regulated genes in Wounding from PMID: 30772301 | SOX2 |
| 4384 ELAVL1     | SOX2 regulated genes in Wounding from PMID: 30772301 | SOX2 |
| 4385 ACOT1      | SOX2 regulated genes in Wounding from PMID: 30772301 | SOX2 |
| 4386 ACOT2      | SOX2 regulated genes in Wounding from PMID: 30772301 | SOX2 |
| 4387 NCKAP5     | SOX2 regulated genes in Wounding from PMID: 30772301 | SOX2 |
| 4388 DSP        | SOX2 regulated genes in Wounding from PMID: 30772301 | SOX2 |
| 4389 PFDN1      | SOX2 regulated genes in Wounding from PMID: 30772301 | SOX2 |
| 4390 TET3       | SOX2 regulated genes in Wounding from PMID: 30772301 | SOX2 |

|               |                                                      |      |
|---------------|------------------------------------------------------|------|
| 4391 KRT32    | SOX2 regulated genes in Wounding from PMID: 30772301 | SOX2 |
| 4392 TMEM120B | SOX2 regulated genes in Wounding from PMID: 30772301 | SOX2 |
| 4393 CDK2AP1  | SOX2 regulated genes in Wounding from PMID: 30772301 | SOX2 |
| 4394 PRR7     | SOX2 regulated genes in Wounding from PMID: 30772301 | SOX2 |
| 4395 TMEM184A | SOX2 regulated genes in Wounding from PMID: 30772301 | SOX2 |
| 4396 SMUG1    | SOX2 regulated genes in Wounding from PMID: 30772301 | SOX2 |
| 4397 RAP1GAP  | SOX2 regulated genes in Wounding from PMID: 30772301 | SOX2 |
| 4398 FURIN    | SOX2 regulated genes in Wounding from PMID: 30772301 | SOX2 |
| 4399 PTPN11   | SOX2 regulated genes in Wounding from PMID: 30772301 | SOX2 |
| 4400 EIF2B3   | SOX2 regulated genes in Wounding from PMID: 30772301 | SOX2 |
| 4401 AKAP9    | SOX2 regulated genes in Wounding from PMID: 30772301 | SOX2 |
| 4402 SERTAD4  | SOX2 regulated genes in Wounding from PMID: 30772301 | SOX2 |
| 4403 SNRPD2   | SOX2 regulated genes in Wounding from PMID: 30772301 | SOX2 |
| 4404 SMIM7    | SOX2 regulated genes in Wounding from PMID: 30772301 | SOX2 |
| 4405 MYL6     | SOX2 regulated genes in Wounding from PMID: 30772301 | SOX2 |
| 4406 TLX1     | SOX2 regulated genes in Wounding from PMID: 30772301 | SOX2 |
| 4407 TPPP     | SOX2 regulated genes in Wounding from PMID: 30772301 | SOX2 |
| 4408 KRTCAP3  | SOX2 regulated genes in Wounding from PMID: 30772301 | SOX2 |
| 4409 TBCD     | SOX2 regulated genes in Wounding from PMID: 30772301 | SOX2 |
| 4410 PIGM     | SOX2 regulated genes in Wounding from PMID: 30772301 | SOX2 |
| 4411 FZD3     | SOX2 regulated genes in Wounding from PMID: 30772301 | SOX2 |
| 4412 RNF222   | SOX2 regulated genes in Wounding from PMID: 30772301 | SOX2 |
| 4413 LINGO1   | SOX2 regulated genes in Wounding from PMID: 30772301 | SOX2 |
| 4414 SPACA6   | SOX2 regulated genes in Wounding from PMID: 30772301 | SOX2 |
| 4415 LMNB2    | SOX2 regulated genes in Wounding from PMID: 30772301 | SOX2 |
| 4416 NAPEPLD  | SOX2 regulated genes in Wounding from PMID: 30772301 | SOX2 |
| 4417 ABCF3    | SOX2 regulated genes in Wounding from PMID: 30772301 | SOX2 |
| 4418 ALG8     | SOX2 regulated genes in Wounding from PMID: 30772301 | SOX2 |
| 4419 TMED2    | SOX2 regulated genes in Wounding from PMID: 30772301 | SOX2 |
| 4420 HES1     | SOX2 regulated genes in Wounding from PMID: 30772301 | SOX2 |
| 4421 SFPQ     | SOX2 regulated genes in Wounding from PMID: 30772301 | SOX2 |
| 4422 MARVELD3 | SOX2 regulated genes in Wounding from PMID: 30772301 | SOX2 |
| 4423 PYROXD1  | SOX2 regulated genes in Wounding from PMID: 30772301 | SOX2 |
| 4424 NUAK1    | SOX2 regulated genes in Wounding from PMID: 30772301 | SOX2 |
| 4425 LTBP4    | SOX2 regulated genes in Wounding from PMID: 30772301 | SOX2 |
| 4426 VANGL2   | SOX2 regulated genes in Wounding from PMID: 30772301 | SOX2 |
| 4427 EFNA3    | SOX2 regulated genes in Wounding from PMID: 30772301 | SOX2 |
| 4428 JMJD4    | SOX2 regulated genes in Wounding from PMID: 30772301 | SOX2 |
| 4429 CALM1    | SOX2 regulated genes in Wounding from PMID: 30772301 | SOX2 |
| 4430 PRKCZ    | SOX2 regulated genes in Wounding from PMID: 30772301 | SOX2 |
| 4431 DDR1     | SOX2 regulated genes in Wounding from PMID: 30772301 | SOX2 |
| 4432 SNRPA1   | SOX2 regulated genes in Wounding from PMID: 30772301 | SOX2 |
| 4433 ARHGEF28 | SOX2 regulated genes in Wounding from PMID: 30772301 | SOX2 |
| 4434 PHF23    | SOX2 regulated genes in Wounding from PMID: 30772301 | SOX2 |
| 4435 SLC2A1   | SOX2 regulated genes in Wounding from PMID: 30772301 | SOX2 |
| 4436 CNTNAP1  | SOX2 regulated genes in Wounding from PMID: 30772301 | SOX2 |
| 4437 VDR      | SOX2 regulated genes in Wounding from PMID: 30772301 | SOX2 |
| 4438 LMNA     | SOX2 regulated genes in Wounding from PMID: 30772301 | SOX2 |
| 4439 GPRC5D   | SOX2 regulated genes in Wounding from PMID: 30772301 | SOX2 |
| 4440 COPB2    | SOX2 regulated genes in Wounding from PMID: 30772301 | SOX2 |
| 4441 EXOC7    | SOX2 regulated genes in Wounding from PMID: 30772301 | SOX2 |
| 4442 GAS8     | SOX2 regulated genes in Wounding from PMID: 30772301 | SOX2 |
| 4443 GLI2     | SOX2 regulated genes in Wounding from PMID: 30772301 | SOX2 |
| 4444 AFDN     | SOX2 regulated genes in Wounding from PMID: 30772301 | SOX2 |
| 4445 THEM4    | SOX2 regulated genes in Wounding from PMID: 30772301 | SOX2 |
| 4446 ST14     | SOX2 regulated genes in Wounding from PMID: 30772301 | SOX2 |
| 4447 RRM2     | SOX2 regulated genes in Wounding from PMID: 30772301 | SOX2 |
| 4448 RABL2A   | SOX2 regulated genes in Wounding from PMID: 30772301 | SOX2 |
| 4449 PPM1G    | SOX2 regulated genes in Wounding from PMID: 30772301 | SOX2 |
| 4450 KIF21A   | SOX2 regulated genes in Wounding from PMID: 30772301 | SOX2 |
| 4451 NPM2     | SOX2 regulated genes in Wounding from PMID: 30772301 | SOX2 |

|               |                                                      |      |
|---------------|------------------------------------------------------|------|
| 4452 EIF2S3B  | SOX2 regulated genes in Wounding from PMID: 30772301 | SOX2 |
| 4453 KRT8     | SOX2 regulated genes in Wounding from PMID: 30772301 | SOX2 |
| 4454 NKD2     | SOX2 regulated genes in Wounding from PMID: 30772301 | SOX2 |
| 4455 NUDT21   | SOX2 regulated genes in Wounding from PMID: 30772301 | SOX2 |
| 4456 SYT13    | SOX2 regulated genes in Wounding from PMID: 30772301 | SOX2 |
| 4457 TNN      | SOX2 regulated genes in Wounding from PMID: 30772301 | SOX2 |
| 4458 XXYL1    | SOX2 regulated genes in Wounding from PMID: 30772301 | SOX2 |
| 4459 LMTK3    | SOX2 regulated genes in Wounding from PMID: 30772301 | SOX2 |
| 4460 THUMP3   | SOX2 regulated genes in Wounding from PMID: 30772301 | SOX2 |
| 4461 FOXJ1    | SOX2 regulated genes in Wounding from PMID: 30772301 | SOX2 |
| 4462 ENAH     | SOX2 regulated genes in Wounding from PMID: 30772301 | SOX2 |
| 4463 ARHGAP32 | SOX2 regulated genes in Wounding from PMID: 30772301 | SOX2 |
| 4464 CAPN2    | SOX2 regulated genes in Wounding from PMID: 30772301 | SOX2 |
| 4465 TMEM54   | SOX2 regulated genes in Wounding from PMID: 30772301 | SOX2 |
| 4466 VPS45    | SOX2 regulated genes in Wounding from PMID: 30772301 | SOX2 |
| 4467 FAM8A1   | SOX2 regulated genes in Wounding from PMID: 30772301 | SOX2 |
| 4468 TMEM231  | SOX2 regulated genes in Wounding from PMID: 30772301 | SOX2 |
| 4469 S100A14  | SOX2 regulated genes in Wounding from PMID: 30772301 | SOX2 |
| 4470 ARHGEF5  | SOX2 regulated genes in Wounding from PMID: 30772301 | SOX2 |
| 4471 PPP1R2   | SOX2 regulated genes in Wounding from PMID: 30772301 | SOX2 |
| 4472 PPP1R2B  | SOX2 regulated genes in Wounding from PMID: 30772301 | SOX2 |
| 4473 RAB31P   | SOX2 regulated genes in Wounding from PMID: 30772301 | SOX2 |
| 4474 TAX1BP1  | SOX2 regulated genes in Wounding from PMID: 30772301 | SOX2 |
| 4475 PM20D1   | SOX2 regulated genes in Wounding from PMID: 30772301 | SOX2 |
| 4476 EMP1     | SOX2 regulated genes in Wounding from PMID: 30772301 | SOX2 |
| 4477 FZD10    | SOX2 regulated genes in Wounding from PMID: 30772301 | SOX2 |
| 4478 UBE2O    | SOX2 regulated genes in Wounding from PMID: 30772301 | SOX2 |
| 4479 FAM98A   | SOX2 regulated genes in Wounding from PMID: 30772301 | SOX2 |
| 4480 CNN3     | SOX2 regulated genes in Wounding from PMID: 30772301 | SOX2 |
| 4481 STK16    | SOX2 regulated genes in Wounding from PMID: 30772301 | SOX2 |
| 4482 FBRS     | SOX2 regulated genes in Wounding from PMID: 30772301 | SOX2 |
| 4483 TCERG1   | SOX2 regulated genes in Wounding from PMID: 30772301 | SOX2 |
| 4484 FAM136A  | SOX2 regulated genes in Wounding from PMID: 30772301 | SOX2 |
| 4485 ANP32E   | SOX2 regulated genes in Wounding from PMID: 30772301 | SOX2 |
| 4486 NEMF     | SOX2 regulated genes in Wounding from PMID: 30772301 | SOX2 |
| 4487 ZNF326   | SOX2 regulated genes in Wounding from PMID: 30772301 | SOX2 |
| 4488 MTUS1    | SOX2 regulated genes in Wounding from PMID: 30772301 | SOX2 |
| 4489 ADGRG1   | SOX2 regulated genes in Wounding from PMID: 30772301 | SOX2 |
| 4490 NBEAL2   | SOX2 regulated genes in Wounding from PMID: 30772301 | SOX2 |
| 4491 SIPA1L2  | SOX2 regulated genes in Wounding from PMID: 30772301 | SOX2 |
| 4492 LLGL1    | SOX2 regulated genes in Wounding from PMID: 30772301 | SOX2 |
| 4493 SPG7     | SOX2 regulated genes in Wounding from PMID: 30772301 | SOX2 |
| 4494 MTX2     | SOX2 regulated genes in Wounding from PMID: 30772301 | SOX2 |
| 4495 SHKBP1   | SOX2 regulated genes in Wounding from PMID: 30772301 | SOX2 |
| 4496 FNBP1L   | SOX2 regulated genes in Wounding from PMID: 30772301 | SOX2 |
| 4497 BAZ1A    | SOX2 regulated genes in Wounding from PMID: 30772301 | SOX2 |
| 4498 KCTD3    | SOX2 regulated genes in Wounding from PMID: 30772301 | SOX2 |
| 4499 SLC6A2   | SOX2 regulated genes in Wounding from PMID: 30772301 | SOX2 |
| 4500 VGLL4    | SOX2 regulated genes in Wounding from PMID: 30772301 | SOX2 |
| 4501 OST4     | SOX2 regulated genes in Wounding from PMID: 30772301 | SOX2 |
| 4502 ARHGAP20 | SOX2 regulated genes in Wounding from PMID: 30772301 | SOX2 |
| 4503 DNAJB1   | SOX2 regulated genes in Wounding from PMID: 30772301 | SOX2 |
| 4504 EPHX4    | SOX2 regulated genes in Wounding from PMID: 30772301 | SOX2 |
| 4505 SIKE1    | SOX2 regulated genes in Wounding from PMID: 30772301 | SOX2 |
| 4506 CD9      | SOX2 regulated genes in Wounding from PMID: 30772301 | SOX2 |
| 4507 DNAJC11  | SOX2 regulated genes in Wounding from PMID: 30772301 | SOX2 |
| 4508 KRT40    | SOX2 regulated genes in Wounding from PMID: 30772301 | SOX2 |
| 4509 CNOT9    | SOX2 regulated genes in Wounding from PMID: 30772301 | SOX2 |
| 4510 MAP4     | SOX2 regulated genes in Wounding from PMID: 30772301 | SOX2 |
| 4511 COG1     | SOX2 regulated genes in Wounding from PMID: 30772301 | SOX2 |
| 4512 PTPN12   | SOX2 regulated genes in Wounding from PMID: 30772301 | SOX2 |

|               |                                                      |      |
|---------------|------------------------------------------------------|------|
| 4513 IL1F10   | SOX2 regulated genes in Wounding from PMID: 30772301 | SOX2 |
| 4514 MAP7D1   | SOX2 regulated genes in Wounding from PMID: 30772301 | SOX2 |
| 4515 SH3BP5L  | SOX2 regulated genes in Wounding from PMID: 30772301 | SOX2 |
| 4516 RHBD2    | SOX2 regulated genes in Wounding from PMID: 30772301 | SOX2 |
| 4517 EPHB2    | SOX2 regulated genes in Wounding from PMID: 30772301 | SOX2 |
| 4518 DAPL1    | SOX2 regulated genes in Wounding from PMID: 30772301 | SOX2 |
| 4519 ERBB2    | SOX2 regulated genes in Wounding from PMID: 30772301 | SOX2 |
| 4520 SAMD4B   | SOX2 regulated genes in Wounding from PMID: 30772301 | SOX2 |
| 4521 LPCAT4   | SOX2 regulated genes in Wounding from PMID: 30772301 | SOX2 |
| 4522 CDC14A   | SOX2 regulated genes in Wounding from PMID: 30772301 | SOX2 |
| 4523 WNT9A    | SOX2 regulated genes in Wounding from PMID: 30772301 | SOX2 |
| 4524 GTF2H3   | SOX2 regulated genes in Wounding from PMID: 30772301 | SOX2 |
| 4525 HEATR3   | SOX2 regulated genes in Wounding from PMID: 30772301 | SOX2 |
| 4526 PKP1     | SOX2 regulated genes in Wounding from PMID: 30772301 | SOX2 |
| 4527 ANKRD13C | SOX2 regulated genes in Wounding from PMID: 30772301 | SOX2 |
| 4528 ZC3H11A  | SOX2 regulated genes in Wounding from PMID: 30772301 | SOX2 |
| 4529 ZC3H11B  | SOX2 regulated genes in Wounding from PMID: 30772301 | SOX2 |
| 4530 LMBRD2   | SOX2 regulated genes in Wounding from PMID: 30772301 | SOX2 |
| 4531 NECAB2   | SOX2 regulated genes in Wounding from PMID: 30772301 | SOX2 |
| 4532 SFN      | SOX2 regulated genes in Wounding from PMID: 30772301 | SOX2 |
| 4533 GRHL1    | SOX2 regulated genes in Wounding from PMID: 30772301 | SOX2 |
| 4534 MYBPC3   | SOX2 regulated genes in Wounding from PMID: 30772301 | SOX2 |
| 4535 AMOTL2   | SOX2 regulated genes in Wounding from PMID: 30772301 | SOX2 |
| 4536 PHLDA1   | SOX2 regulated genes in Wounding from PMID: 30772301 | SOX2 |
| 4537 TRIM39   | SOX2 regulated genes in Wounding from PMID: 30772301 | SOX2 |
| 4538 TUBA1C   | SOX2 regulated genes in Wounding from PMID: 30772301 | SOX2 |
| 4539 EML2     | SOX2 regulated genes in Wounding from PMID: 30772301 | SOX2 |
| 4540 HNRNPH1  | SOX2 regulated genes in Wounding from PMID: 30772301 | SOX2 |
| 4541 TRIM28   | SOX2 regulated genes in Wounding from PMID: 30772301 | SOX2 |
| 4542 KRTAP3-1 | SOX2 regulated genes in Wounding from PMID: 30772301 | SOX2 |
| 4543 KRT23    | SOX2 regulated genes in Wounding from PMID: 30772301 | SOX2 |
| 4544 ERP44    | SOX2 regulated genes in Wounding from PMID: 30772301 | SOX2 |
| 4545 F2RL1    | SOX2 regulated genes in Wounding from PMID: 30772301 | SOX2 |
| 4546 SPRY4    | SOX2 regulated genes in Wounding from PMID: 30772301 | SOX2 |
| 4547 DUOXA1   | SOX2 regulated genes in Wounding from PMID: 30772301 | SOX2 |
| 4548 RAD17    | SOX2 regulated genes in Wounding from PMID: 30772301 | SOX2 |
| 4549 STK11    | SOX2 regulated genes in Wounding from PMID: 30772301 | SOX2 |
| 4550 USP6NL   | SOX2 regulated genes in Wounding from PMID: 30772301 | SOX2 |
| 4551 EPHB1    | SOX2 regulated genes in Wounding from PMID: 30772301 | SOX2 |
| 4552 SNAP47   | SOX2 regulated genes in Wounding from PMID: 30772301 | SOX2 |
| 4553 RBM14    | SOX2 regulated genes in Wounding from PMID: 30772301 | SOX2 |
| 4554 MYT1L    | SOX2 regulated genes in Wounding from PMID: 30772301 | SOX2 |
| 4555 RABIF    | SOX2 regulated genes in Wounding from PMID: 30772301 | SOX2 |
| 4556 CDC42EP4 | SOX2 regulated genes in Wounding from PMID: 30772301 | SOX2 |
| 4557 F2R      | SOX2 regulated genes in Wounding from PMID: 30772301 | SOX2 |
| 4558 CAMSAP3  | SOX2 regulated genes in Wounding from PMID: 30772301 | SOX2 |
| 4559 KPRP     | SOX2 regulated genes in Wounding from PMID: 30772301 | SOX2 |
| 4560 THOC7    | SOX2 regulated genes in Wounding from PMID: 30772301 | SOX2 |
| 4561 TRAPPC3  | SOX2 regulated genes in Wounding from PMID: 30772301 | SOX2 |
| 4562 CDC25A   | SOX2 regulated genes in Wounding from PMID: 30772301 | SOX2 |
| 4563 OLFM2    | SOX2 regulated genes in Wounding from PMID: 30772301 | SOX2 |
| 4564 WSB2     | SOX2 regulated genes in Wounding from PMID: 30772301 | SOX2 |
| 4565 GPATCH4  | SOX2 regulated genes in Wounding from PMID: 30772301 | SOX2 |
| 4566 PLK2     | SOX2 regulated genes in Wounding from PMID: 30772301 | SOX2 |
| 4567 HMGXB3   | SOX2 regulated genes in Wounding from PMID: 30772301 | SOX2 |
| 4568 PCDHB16  | SOX2 regulated genes in Wounding from PMID: 30772301 | SOX2 |
| 4569 EIF4G1   | SOX2 regulated genes in Wounding from PMID: 30772301 | SOX2 |
| 4570 VPS37B   | SOX2 regulated genes in Wounding from PMID: 30772301 | SOX2 |
| 4571 NPPC     | SOX2 regulated genes in Wounding from PMID: 30772301 | SOX2 |
| 4572 TAGLN2   | SOX2 regulated genes in Wounding from PMID: 30772301 | SOX2 |
| 4573 P3H2     | SOX2 regulated genes in Wounding from PMID: 30772301 | SOX2 |

|               |                                                      |      |
|---------------|------------------------------------------------------|------|
| 4574 NPEPPS   | SOX2 regulated genes in Wounding from PMID: 30772301 | SOX2 |
| 4575 SEC22B   | SOX2 regulated genes in Wounding from PMID: 30772301 | SOX2 |
| 4576 SH3PXD2A | SOX2 regulated genes in Wounding from PMID: 30772301 | SOX2 |
| 4577 KRT39    | SOX2 regulated genes in Wounding from PMID: 30772301 | SOX2 |
| 4578 ALDH3B2  | SOX2 regulated genes in Wounding from PMID: 30772301 | SOX2 |
| 4579 GRAMD2A  | SOX2 regulated genes in Wounding from PMID: 30772301 | SOX2 |
| 4580 PCBP1    | SOX2 regulated genes in Wounding from PMID: 30772301 | SOX2 |
| 4581 HS2ST1   | SOX2 regulated genes in Wounding from PMID: 30772301 | SOX2 |
| 4582 KRAS     | SOX2 regulated genes in Wounding from PMID: 30772301 | SOX2 |
| 4583 FAM83E   | SOX2 regulated genes in Wounding from PMID: 30772301 | SOX2 |
| 4584 PTHLH    | SOX2 regulated genes in Wounding from PMID: 30772301 | SOX2 |
| 4585 USP31    | SOX2 regulated genes in Wounding from PMID: 30772301 | SOX2 |
| 4586 POLR3D   | SOX2 regulated genes in Wounding from PMID: 30772301 | SOX2 |
| 4587 S100A1   | SOX2 regulated genes in Wounding from PMID: 30772301 | SOX2 |
| 4588 FUT1     | SOX2 regulated genes in Wounding from PMID: 30772301 | SOX2 |
| 4589 NT5E     | SOX2 regulated genes in Wounding from PMID: 30772301 | SOX2 |
| 4590 SGK1     | SOX2 regulated genes in Wounding from PMID: 30772301 | SOX2 |
| 4591 ZNF23    | SOX2 regulated genes in Wounding from PMID: 30772301 | SOX2 |
| 4592 HMCN1    | SOX2 regulated genes in Wounding from PMID: 30772301 | SOX2 |
| 4593 NECTIN2  | SOX2 regulated genes in Wounding from PMID: 30772301 | SOX2 |
| 4594 EPN3     | SOX2 regulated genes in Wounding from PMID: 30772301 | SOX2 |
| 4595 FOXO6    | SOX2 regulated genes in Wounding from PMID: 30772301 | SOX2 |
| 4596 G3BP1    | SOX2 regulated genes in Wounding from PMID: 30772301 | SOX2 |
| 4597 CAB39    | SOX2 regulated genes in Wounding from PMID: 30772301 | SOX2 |
| 4598 PCBP4    | SOX2 regulated genes in Wounding from PMID: 30772301 | SOX2 |
| 4599 THOC3    | SOX2 regulated genes in Wounding from PMID: 30772301 | SOX2 |
| 4600 YAF2     | SOX2 regulated genes in Wounding from PMID: 30772301 | SOX2 |
| 4601 GZMM     | SOX2 regulated genes in Wounding from PMID: 30772301 | SOX2 |
| 4602 CYP251   | SOX2 regulated genes in Wounding from PMID: 30772301 | SOX2 |
| 4603 SUCO     | SOX2 regulated genes in Wounding from PMID: 30772301 | SOX2 |
| 4604 CAST     | SOX2 regulated genes in Wounding from PMID: 30772301 | SOX2 |
| 4605 RNF225   | SOX2 regulated genes in Wounding from PMID: 30772301 | SOX2 |
| 4606 KLHL12   | SOX2 regulated genes in Wounding from PMID: 30772301 | SOX2 |
| 4607 STON2    | SOX2 regulated genes in Wounding from PMID: 30772301 | SOX2 |
| 4608 SLC20A1  | SOX2 regulated genes in Wounding from PMID: 30772301 | SOX2 |
| 4609 SCNN1A   | SOX2 regulated genes in Wounding from PMID: 30772301 | SOX2 |
| 4610 NAPA     | SOX2 regulated genes in Wounding from PMID: 30772301 | SOX2 |
| 4611 TMEM107  | SOX2 regulated genes in Wounding from PMID: 30772301 | SOX2 |
| 4612 FGF22    | SOX2 regulated genes in Wounding from PMID: 30772301 | SOX2 |
| 4613 DUSP11   | SOX2 regulated genes in Wounding from PMID: 30772301 | SOX2 |
| 4614 NOP58    | SOX2 regulated genes in Wounding from PMID: 30772301 | SOX2 |
| 4615 MFN1     | SOX2 regulated genes in Wounding from PMID: 30772301 | SOX2 |
| 4616 UCK2     | SOX2 regulated genes in Wounding from PMID: 30772301 | SOX2 |
| 4617 RNF10    | SOX2 regulated genes in Wounding from PMID: 30772301 | SOX2 |
| 4618 CLIP4    | SOX2 regulated genes in Wounding from PMID: 30772301 | SOX2 |
| 4619 ZSWIM4   | SOX2 regulated genes in Wounding from PMID: 30772301 | SOX2 |
| 4620 RAB10    | SOX2 regulated genes in Wounding from PMID: 30772301 | SOX2 |
| 4621 KDM6B    | SOX2 regulated genes in Wounding from PMID: 30772301 | SOX2 |
| 4622 SPINK6   | SOX2 regulated genes in Wounding from PMID: 30772301 | SOX2 |
| 4623 LEMD3    | SOX2 regulated genes in Wounding from PMID: 30772301 | SOX2 |
| 4624 KDM1A    | SOX2 regulated genes in Wounding from PMID: 30772301 | SOX2 |
| 4625 TTYH2    | SOX2 regulated genes in Wounding from PMID: 30772301 | SOX2 |
| 4626 ANAPC13  | SOX2 regulated genes in Wounding from PMID: 30772301 | SOX2 |
| 4627 EPHB3    | SOX2 regulated genes in Wounding from PMID: 30772301 | SOX2 |
| 4628 FBXO45   | SOX2 regulated genes in Wounding from PMID: 30772301 | SOX2 |
| 4629 RHBG     | SOX2 regulated genes in Wounding from PMID: 30772301 | SOX2 |
| 4630 SEC13    | SOX2 regulated genes in Wounding from PMID: 30772301 | SOX2 |
| 4631 MAPK6    | SOX2 regulated genes in Wounding from PMID: 30772301 | SOX2 |
| 4632 ZNF750   | SOX2 regulated genes in Wounding from PMID: 30772301 | SOX2 |
| 4633 CPS1     | SOX2 regulated genes in Wounding from PMID: 30772301 | SOX2 |
| 4634 GOLGA7   | SOX2 regulated genes in Wounding from PMID: 30772301 | SOX2 |

|               |                                                      |      |
|---------------|------------------------------------------------------|------|
| 4635 CUL1     | SOX2 regulated genes in Wounding from PMID: 30772301 | SOX2 |
| 4636 TRIM16   | SOX2 regulated genes in Wounding from PMID: 30772301 | SOX2 |
| 4637 IRF6     | SOX2 regulated genes in Wounding from PMID: 30772301 | SOX2 |
| 4638 LRRC20   | SOX2 regulated genes in Wounding from PMID: 30772301 | SOX2 |
| 4639 RASSF1   | SOX2 regulated genes in Wounding from PMID: 30772301 | SOX2 |
| 4640 INTS7    | SOX2 regulated genes in Wounding from PMID: 30772301 | SOX2 |
| 4641 SPINT2   | SOX2 regulated genes in Wounding from PMID: 30772301 | SOX2 |
| 4642 RYK      | SOX2 regulated genes in Wounding from PMID: 30772301 | SOX2 |
| 4643 SPTBN2   | SOX2 regulated genes in Wounding from PMID: 30772301 | SOX2 |
| 4644 FPGT     | SOX2 regulated genes in Wounding from PMID: 30772301 | SOX2 |
| 4645 KRTAP5-8 | SOX2 regulated genes in Wounding from PMID: 30772301 | SOX2 |
| 4646 NRAS     | SOX2 regulated genes in Wounding from PMID: 30772301 | SOX2 |
| 4647 WNT5A    | SOX2 regulated genes in Wounding from PMID: 30772301 | SOX2 |
| 4648 CDC42EP3 | SOX2 regulated genes in Wounding from PMID: 30772301 | SOX2 |
| 4649 CUL3     | SOX2 regulated genes in Wounding from PMID: 30772301 | SOX2 |
| 4650 CAMSAP2  | SOX2 regulated genes in Wounding from PMID: 30772301 | SOX2 |
| 4651 ASCL4    | SOX2 regulated genes in Wounding from PMID: 30772301 | SOX2 |
| 4652 NOTUM    | SOX2 regulated genes in Wounding from PMID: 30772301 | SOX2 |
| 4653 BBS5     | SOX2 regulated genes in Wounding from PMID: 30772301 | SOX2 |
| 4654 GPA33    | SOX2 regulated genes in Wounding from PMID: 30772301 | SOX2 |
| 4655 GNB1     | SOX2 regulated genes in Wounding from PMID: 30772301 | SOX2 |
| 4656 CYP4F11  | SOX2 regulated genes in Wounding from PMID: 30772301 | SOX2 |
| 4657 CYP4A11  | SOX2 regulated genes in Wounding from PMID: 30772301 | SOX2 |
| 4658 MARVELD2 | SOX2 regulated genes in Wounding from PMID: 30772301 | SOX2 |
| 4659 SDC1     | SOX2 regulated genes in Wounding from PMID: 30772301 | SOX2 |
| 4660 KRT33A   | SOX2 regulated genes in Wounding from PMID: 30772301 | SOX2 |
| 4661 BMPR2    | SOX2 regulated genes in Wounding from PMID: 30772301 | SOX2 |
| 4662 PATJ     | SOX2 regulated genes in Wounding from PMID: 30772301 | SOX2 |
| 4663 ARF1     | SOX2 regulated genes in Wounding from PMID: 30772301 | SOX2 |
| 4664 TCF3     | SOX2 regulated genes in Wounding from PMID: 30772301 | SOX2 |
| 4665 CORO1C   | SOX2 regulated genes in Wounding from PMID: 30772301 | SOX2 |
| 4666 EZR      | SOX2 regulated genes in Wounding from PMID: 30772301 | SOX2 |
| 4667 APPBP2   | SOX2 regulated genes in Wounding from PMID: 30772301 | SOX2 |
| 4668 RBM12B   | SOX2 regulated genes in Wounding from PMID: 30772301 | SOX2 |
| 4669 RASA2    | SOX2 regulated genes in Wounding from PMID: 30772301 | SOX2 |
| 4670 ATP1A1   | SOX2 regulated genes in Wounding from PMID: 30772301 | SOX2 |
| 4671 DUOX1    | SOX2 regulated genes in Wounding from PMID: 30772301 | SOX2 |
| 4672 LSM12    | SOX2 regulated genes in Wounding from PMID: 30772301 | SOX2 |
| 4673 GPX2     | SOX2 regulated genes in Wounding from PMID: 30772301 | SOX2 |
| 4674 GPR87    | SOX2 regulated genes in Wounding from PMID: 30772301 | SOX2 |
| 4675 KRTAP3-3 | SOX2 regulated genes in Wounding from PMID: 30772301 | SOX2 |
| 4676 KRTAP3-2 | SOX2 regulated genes in Wounding from PMID: 30772301 | SOX2 |
| 4677 DUSP7    | SOX2 regulated genes in Wounding from PMID: 30772301 | SOX2 |
| 4678 APLP1    | SOX2 regulated genes in Wounding from PMID: 30772301 | SOX2 |
| 4679 GOLIM4   | SOX2 regulated genes in Wounding from PMID: 30772301 | SOX2 |
| 4680 CTNND1   | SOX2 regulated genes in Wounding from PMID: 30772301 | SOX2 |
| 4681 PLPPR2   | SOX2 regulated genes in Wounding from PMID: 30772301 | SOX2 |
| 4682 FAF1     | SOX2 regulated genes in Wounding from PMID: 30772301 | SOX2 |
| 4683 IFT20    | SOX2 regulated genes in Wounding from PMID: 30772301 | SOX2 |
| 4684 LAMC2    | SOX2 regulated genes in Wounding from PMID: 30772301 | SOX2 |
| 4685 ZNF7     | SOX2 regulated genes in Wounding from PMID: 30772301 | SOX2 |
| 4686 FOXP4    | SOX2 regulated genes in Wounding from PMID: 30772301 | SOX2 |
| 4687 RNF145   | SOX2 regulated genes in Wounding from PMID: 30772301 | SOX2 |
| 4688 ITPKB    | SOX2 regulated genes in Wounding from PMID: 30772301 | SOX2 |
| 4689 ACVR1B   | SOX2 regulated genes in Wounding from PMID: 30772301 | SOX2 |
| 4690 IGSF3    | SOX2 regulated genes in Wounding from PMID: 30772301 | SOX2 |
| 4691 PIK3R3   | SOX2 regulated genes in Wounding from PMID: 30772301 | SOX2 |
| 4692 CBX2     | SOX2 regulated genes in Wounding from PMID: 30772301 | SOX2 |
| 4693 USP7     | SOX2 regulated genes in Wounding from PMID: 30772301 | SOX2 |
| 4694 KMT5A    | SOX2 regulated genes in Wounding from PMID: 30772301 | SOX2 |
| 4695 MMADHC   | SOX2 regulated genes in Wounding from PMID: 30772301 | SOX2 |

|               |                                                      |      |
|---------------|------------------------------------------------------|------|
| 4696 RRP15    | SOX2 regulated genes in Wounding from PMID: 30772301 | SOX2 |
| 4697 PRMT7    | SOX2 regulated genes in Wounding from PMID: 30772301 | SOX2 |
| 4698 TSR1     | SOX2 regulated genes in Wounding from PMID: 30772301 | SOX2 |
| 4699 HDAC1    | SOX2 regulated genes in Wounding from PMID: 30772301 | SOX2 |
| 4700 OTOP2    | SOX2 regulated genes in Wounding from PMID: 30772301 | SOX2 |
| 4701 EVPL     | SOX2 regulated genes in Wounding from PMID: 30772301 | SOX2 |
| 4702 IST1     | SOX2 regulated genes in Wounding from PMID: 30772301 | SOX2 |
| 4703 ATP2A2   | SOX2 regulated genes in Wounding from PMID: 30772301 | SOX2 |
| 4704 CITED4   | SOX2 regulated genes in Wounding from PMID: 30772301 | SOX2 |
| 4705 ERBB3    | SOX2 regulated genes in Wounding from PMID: 30772301 | SOX2 |
| 4706 CCDC92   | SOX2 regulated genes in Wounding from PMID: 30772301 | SOX2 |
| 4707 KIFC2    | SOX2 regulated genes in Wounding from PMID: 30772301 | SOX2 |
| 4708 ACTG1    | SOX2 regulated genes in Wounding from PMID: 30772301 | SOX2 |
| 4709 CFTR     | SOX2 regulated genes in Wounding from PMID: 30772301 | SOX2 |
| 4710 TRIM59   | SOX2 regulated genes in Wounding from PMID: 30772301 | SOX2 |
| 4711 AGBL5    | SOX2 regulated genes in Wounding from PMID: 30772301 | SOX2 |
| 4712 B4GALT3  | SOX2 regulated genes in Wounding from PMID: 30772301 | SOX2 |
| 4713 MAP4K4   | SOX2 regulated genes in Wounding from PMID: 30772301 | SOX2 |
| 4714 TMEM65   | SOX2 regulated genes in Wounding from PMID: 30772301 | SOX2 |
| 4715 RNF39    | SOX2 regulated genes in Wounding from PMID: 30772301 | SOX2 |
| 4716 C6orf141 | SOX2 regulated genes in Wounding from PMID: 30772301 | SOX2 |
| 4717 CTPS1    | SOX2 regulated genes in Wounding from PMID: 30772301 | SOX2 |
| 4718 ATP2C2   | SOX2 regulated genes in Wounding from PMID: 30772301 | SOX2 |
| 4719 ADGRL2   | SOX2 regulated genes in Wounding from PMID: 30772301 | SOX2 |
| 4720 WDR75    | SOX2 regulated genes in Wounding from PMID: 30772301 | SOX2 |
| 4721 LRP12    | SOX2 regulated genes in Wounding from PMID: 30772301 | SOX2 |
| 4722 TMEM120A | SOX2 regulated genes in Wounding from PMID: 30772301 | SOX2 |
| 4723 FER      | SOX2 regulated genes in Wounding from PMID: 30772301 | SOX2 |
| 4724 HSPA4    | SOX2 regulated genes in Wounding from PMID: 30772301 | SOX2 |
| 4725 PTPN9    | SOX2 regulated genes in Wounding from PMID: 30772301 | SOX2 |
| 4726 DVL3     | SOX2 regulated genes in Wounding from PMID: 30772301 | SOX2 |
| 4727 FZD5     | SOX2 regulated genes in Wounding from PMID: 30772301 | SOX2 |
| 4728 USP53    | SOX2 regulated genes in Wounding from PMID: 30772301 | SOX2 |
| 4729 CHD1     | SOX2 regulated genes in Wounding from PMID: 30772301 | SOX2 |
| 4730 KLF10    | SOX2 regulated genes in Wounding from PMID: 30772301 | SOX2 |
| 4731 IGSF8    | SOX2 regulated genes in Wounding from PMID: 30772301 | SOX2 |
| 4732 SYT8     | SOX2 regulated genes in Wounding from PMID: 30772301 | SOX2 |
| 4733 PTBP1    | SOX2 regulated genes in Wounding from PMID: 30772301 | SOX2 |
| 4734 WWC1     | SOX2 regulated genes in Wounding from PMID: 30772301 | SOX2 |
| 4735 PITHD1   | SOX2 regulated genes in Wounding from PMID: 30772301 | SOX2 |
| 4736 RBMXL1   | SOX2 regulated genes in Wounding from PMID: 30772301 | SOX2 |
| 4737 RASGEF1B | SOX2 regulated genes in Wounding from PMID: 30772301 | SOX2 |
| 4738 RNF25    | SOX2 regulated genes in Wounding from PMID: 30772301 | SOX2 |
| 4739 PADI3    | SOX2 regulated genes in Wounding from PMID: 30772301 | SOX2 |
| 4740 CSRP1    | SOX2 regulated genes in Wounding from PMID: 30772301 | SOX2 |
| 4741 AGRN     | SOX2 regulated genes in Wounding from PMID: 30772301 | SOX2 |
| 4742 TMEM229B | SOX2 regulated genes in Wounding from PMID: 30772301 | SOX2 |
| 4743 CHD4     | SOX2 regulated genes in Wounding from PMID: 30772301 | SOX2 |
| 4744 CYTH2    | SOX2 regulated genes in Wounding from PMID: 30772301 | SOX2 |
| 4745 SLC30A3  | SOX2 regulated genes in Wounding from PMID: 30772301 | SOX2 |
| 4746 EPHA4    | SOX2 regulated genes in Wounding from PMID: 30772301 | SOX2 |
| 4747 CRIP3    | SOX2 regulated genes in Wounding from PMID: 30772301 | SOX2 |
| 4748 ACTR1B   | SOX2 regulated genes in Wounding from PMID: 30772301 | SOX2 |
| 4749 LY6G6D   | SOX2 regulated genes in Wounding from PMID: 30772301 | SOX2 |
| 4750 NGF      | SOX2 regulated genes in Wounding from PMID: 30772301 | SOX2 |
| 4751 ZRANB2   | SOX2 regulated genes in Wounding from PMID: 30772301 | SOX2 |
| 4752 SSTR2    | SOX2 regulated genes in Wounding from PMID: 30772301 | SOX2 |
| 4753 GALE     | SOX2 regulated genes in Wounding from PMID: 30772301 | SOX2 |
| 4754 TMEM68   | SOX2 regulated genes in Wounding from PMID: 30772301 | SOX2 |
| 4755 GATA3    | SOX2 regulated genes in Wounding from PMID: 30772301 | SOX2 |
| 4756 SPTY2D1  | SOX2 regulated genes in Wounding from PMID: 30772301 | SOX2 |



|               |                                                      |      |
|---------------|------------------------------------------------------|------|
| 4757 ZNF605   | SOX2 regulated genes in Wounding from PMID: 30772301 | SOX2 |
| 4758 PRPF40B  | SOX2 regulated genes in Wounding from PMID: 30772301 | SOX2 |
| 4759 KLHL29   | SOX2 regulated genes in Wounding from PMID: 30772301 | SOX2 |
| 4760 TUBA1A   | SOX2 regulated genes in Wounding from PMID: 30772301 | SOX2 |
| 4761 TAF7     | SOX2 regulated genes in Wounding from PMID: 30772301 | SOX2 |
| 4762 CEP83    | SOX2 regulated genes in Wounding from PMID: 30772301 | SOX2 |
| 4763 LLGL2    | SOX2 regulated genes in Wounding from PMID: 30772301 | SOX2 |
| 4764 KRT79    | SOX2 regulated genes in Wounding from PMID: 30772301 | SOX2 |
| 4765 MAP6     | SOX2 regulated genes in Wounding from PMID: 30772301 | SOX2 |
| 4766 PLK3     | SOX2 regulated genes in Wounding from PMID: 30772301 | SOX2 |
| 4767 ACSL3    | SOX2 regulated genes in Wounding from PMID: 30772301 | SOX2 |
| 4768 EGR2     | SOX2 regulated genes in Wounding from PMID: 30772301 | SOX2 |
| 4769 PALMD    | SOX2 regulated genes in Wounding from PMID: 30772301 | SOX2 |
| 4770 KIF21B   | SOX2 regulated genes in Wounding from PMID: 30772301 | SOX2 |
| 4771 TRNP1    | SOX2 regulated genes in Wounding from PMID: 30772301 | SOX2 |
| 4772 NUDCD1   | SOX2 regulated genes in Wounding from PMID: 30772301 | SOX2 |
| 4773 DYNC1I2  | SOX2 regulated genes in Wounding from PMID: 30772301 | SOX2 |
| 4774 ANGPTL4  | SOX2 regulated genes in Wounding from PMID: 30772301 | SOX2 |
| 4775 POLB     | SOX2 regulated genes in Wounding from PMID: 30772301 | SOX2 |
| 4776 TMEM139  | SOX2 regulated genes in Wounding from PMID: 30772301 | SOX2 |
| 4777 ABCC1    | SOX2 regulated genes in Wounding from PMID: 30772301 | SOX2 |
| 4778 KLHDC8A  | SOX2 regulated genes in Wounding from PMID: 30772301 | SOX2 |
| 4779 HMGCS2   | SOX2 regulated genes in Wounding from PMID: 30772301 | SOX2 |
| 4780 OTUD7B   | SOX2 regulated genes in Wounding from PMID: 30772301 | SOX2 |
| 4781 LINS1    | SOX2 regulated genes in Wounding from PMID: 30772301 | SOX2 |
| 4782 FLG2     | SOX2 regulated genes in Wounding from PMID: 30772301 | SOX2 |
| 4783 CCDC106  | SOX2 regulated genes in Wounding from PMID: 30772301 | SOX2 |
| 4784 ENC1     | SOX2 regulated genes in Wounding from PMID: 30772301 | SOX2 |
| 4785 TPPP3    | SOX2 regulated genes in Wounding from PMID: 30772301 | SOX2 |
| 4786 SYTL2    | SOX2 regulated genes in Wounding from PMID: 30772301 | SOX2 |
| 4787 HRAS     | SOX2 regulated genes in Wounding from PMID: 30772301 | SOX2 |
| 4788 CCT7     | SOX2 regulated genes in Wounding from PMID: 30772301 | SOX2 |
| 4789 BAHCC1   | SOX2 regulated genes in Wounding from PMID: 30772301 | SOX2 |
| 4790 TUFT1    | SOX2 regulated genes in Wounding from PMID: 30772301 | SOX2 |
| 4791 SHOC2    | SOX2 regulated genes in Wounding from PMID: 30772301 | SOX2 |
| 4792 ARL13B   | SOX2 regulated genes in Wounding from PMID: 30772301 | SOX2 |
| 4793 SLC4A9   | SOX2 regulated genes in Wounding from PMID: 30772301 | SOX2 |
| 4794 LYG2     | SOX2 regulated genes in Wounding from PMID: 30772301 | SOX2 |
| 4795 IRGQ     | SOX2 regulated genes in Wounding from PMID: 30772301 | SOX2 |
| 4796 FXYD3    | SOX2 regulated genes in Wounding from PMID: 30772301 | SOX2 |
| 4797 MIDN     | SOX2 regulated genes in Wounding from PMID: 30772301 | SOX2 |
| 4798 PTGS2    | SOX2 regulated genes in Wounding from PMID: 30772301 | SOX2 |
| 4799 FSTL3    | SOX2 regulated genes in Wounding from PMID: 30772301 | SOX2 |
| 4800 RNF223   | SOX2 regulated genes in Wounding from PMID: 30772301 | SOX2 |
| 4801 GTF2H2C  | SOX2 regulated genes in Wounding from PMID: 30772301 | SOX2 |
| 4802 BMPR1A   | SOX2 regulated genes in Wounding from PMID: 30772301 | SOX2 |
| 4803 SETD5    | SOX2 regulated genes in Wounding from PMID: 30772301 | SOX2 |
| 4804 S100A11  | SOX2 regulated genes in Wounding from PMID: 30772301 | SOX2 |
| 4805 NT5C3A   | SOX2 regulated genes in Wounding from PMID: 30772301 | SOX2 |
| 4806 RAB7B    | SOX2 regulated genes in Wounding from PMID: 30772301 | SOX2 |
| 4807 HOOK2    | SOX2 regulated genes in Wounding from PMID: 30772301 | SOX2 |
| 4808 TBC1D30  | SOX2 regulated genes in Wounding from PMID: 30772301 | SOX2 |
| 4809 ZBTB17   | SOX2 regulated genes in Wounding from PMID: 30772301 | SOX2 |
| 4810 ANGPT2   | SOX2 regulated genes in Wounding from PMID: 30772301 | SOX2 |
| 4811 EBNA1BP2 | SOX2 regulated genes in Wounding from PMID: 30772301 | SOX2 |
| 4812 CNOT2    | SOX2 regulated genes in Wounding from PMID: 30772301 | SOX2 |
| 4813 PLXNB1   | SOX2 regulated genes in Wounding from PMID: 30772301 | SOX2 |
| 4814 GALR2    | SOX2 regulated genes in Wounding from PMID: 30772301 | SOX2 |
| 4815 EIF3B    | SOX2 regulated genes in Wounding from PMID: 30772301 | SOX2 |
| 4816 MAG1     | SOX2 regulated genes in Wounding from PMID: 30772301 | SOX2 |
| 4817 ANXA9    | SOX2 regulated genes in Wounding from PMID: 30772301 | SOX2 |

|                |                                                      |      |
|----------------|------------------------------------------------------|------|
| 4818 SPRR4     | SOX2 regulated genes in Wounding from PMID: 30772301 | SOX2 |
| 4819 ERH       | SOX2 regulated genes in Wounding from PMID: 30772301 | SOX2 |
| 4820 HR        | SOX2 regulated genes in Wounding from PMID: 30772301 | SOX2 |
| 4821 CCNYL1    | SOX2 regulated genes in Wounding from PMID: 30772301 | SOX2 |
| 4822 FAM89A    | SOX2 regulated genes in Wounding from PMID: 30772301 | SOX2 |
| 4823 KRTAP4-6  | SOX2 regulated genes in Wounding from PMID: 30772301 | SOX2 |
| 4824 TCHH      | SOX2 regulated genes in Wounding from PMID: 30772301 | SOX2 |
| 4825 FAM221A   | SOX2 regulated genes in Wounding from PMID: 30772301 | SOX2 |
| 4826 ENPP1     | SOX2 regulated genes in Wounding from PMID: 30772301 | SOX2 |
| 4827 KPNB1     | SOX2 regulated genes in Wounding from PMID: 30772301 | SOX2 |
| 4828 MFF       | SOX2 regulated genes in Wounding from PMID: 30772301 | SOX2 |
| 4829 CDC42SE1  | SOX2 regulated genes in Wounding from PMID: 30772301 | SOX2 |
| 4830 ALYREF    | SOX2 regulated genes in Wounding from PMID: 30772301 | SOX2 |
| 4831 RND3      | SOX2 regulated genes in Wounding from PMID: 30772301 | SOX2 |
| 4832 TANC2     | SOX2 regulated genes in Wounding from PMID: 30772301 | SOX2 |
| 4833 HDLBP     | SOX2 regulated genes in Wounding from PMID: 30772301 | SOX2 |
| 4834 C17orf80  | SOX2 regulated genes in Wounding from PMID: 30772301 | SOX2 |
| 4835 CAP1      | SOX2 regulated genes in Wounding from PMID: 30772301 | SOX2 |
| 4836 ATP6V0E1  | SOX2 regulated genes in Wounding from PMID: 30772301 | SOX2 |
| 4837 PGM1      | SOX2 regulated genes in Wounding from PMID: 30772301 | SOX2 |
| 4838 MAPRE3    | SOX2 regulated genes in Wounding from PMID: 30772301 | SOX2 |
| 4839 C3orf52   | SOX2 regulated genes in Wounding from PMID: 30772301 | SOX2 |
| 4840 TXNRD3    | SOX2 regulated genes in Wounding from PMID: 30772301 | SOX2 |
| 4841 WIZ       | SOX2 regulated genes in Wounding from PMID: 30772301 | SOX2 |
| 4842 YWHAE     | SOX2 regulated genes in Wounding from PMID: 30772301 | SOX2 |
| 4843 CUL2      | SOX2 regulated genes in Wounding from PMID: 30772301 | SOX2 |
| 4844 SMYD2     | SOX2 regulated genes in Wounding from PMID: 30772301 | SOX2 |
| 4845 TMEM181   | SOX2 regulated genes in Wounding from PMID: 30772301 | SOX2 |
| 4846 PDGFA     | SOX2 regulated genes in Wounding from PMID: 30772301 | SOX2 |
| 4847 CDH1      | SOX2 regulated genes in Wounding from PMID: 30772301 | SOX2 |
| 4848 E2F3      | SOX2 regulated genes in Wounding from PMID: 30772301 | SOX2 |
| 4849 SPECC1    | SOX2 regulated genes in Wounding from PMID: 30772301 | SOX2 |
| 4850 GMPPB     | SOX2 regulated genes in Wounding from PMID: 30772301 | SOX2 |
| 4851 TATDN2    | SOX2 regulated genes in Wounding from PMID: 30772301 | SOX2 |
| 4852 SEC22A    | SOX2 regulated genes in Wounding from PMID: 30772301 | SOX2 |
| 4853 PTGES3    | SOX2 regulated genes in Wounding from PMID: 30772301 | SOX2 |
| 4854 CCT3      | SOX2 regulated genes in Wounding from PMID: 30772301 | SOX2 |
| 4855 RAD23A    | SOX2 regulated genes in Wounding from PMID: 30772301 | SOX2 |
| 4856 LYPD6B    | SOX2 regulated genes in Wounding from PMID: 30772301 | SOX2 |
| 4857 DLC1      | SOX2 regulated genes in Wounding from PMID: 30772301 | SOX2 |
| 4858 GPRC5A    | SOX2 regulated genes in Wounding from PMID: 30772301 | SOX2 |
| 4859 PIK3CB    | SOX2 regulated genes in Wounding from PMID: 30772301 | SOX2 |
| 4860 BEND5     | SOX2 regulated genes in Wounding from PMID: 30772301 | SOX2 |
| 4861 DPP9      | SOX2 regulated genes in Wounding from PMID: 30772301 | SOX2 |
| 4862 SLC23A3   | SOX2 regulated genes in Wounding from PMID: 30772301 | SOX2 |
| 4863 PFAH1B3   | SOX2 regulated genes in Wounding from PMID: 30772301 | SOX2 |
| 4864 TRIM5     | SOX2 regulated genes in Wounding from PMID: 30772301 | SOX2 |
| 4865 PIP5K1A   | SOX2 regulated genes in Wounding from PMID: 30772301 | SOX2 |
| 4866 RECQL     | SOX2 regulated genes in Wounding from PMID: 30772301 | SOX2 |
| 4867 TNFRSF10B | SOX2 regulated genes in Wounding from PMID: 30772301 | SOX2 |
| 4868 TNFRSF10C | SOX2 regulated genes in Wounding from PMID: 30772301 | SOX2 |
| 4869 TNFRSF10D | SOX2 regulated genes in Wounding from PMID: 30772301 | SOX2 |
| 4870 YME1L1    | SOX2 regulated genes in Wounding from PMID: 30772301 | SOX2 |
| 4871 HBEGF     | SOX2 regulated genes in Wounding from PMID: 30772301 | SOX2 |
| 4872 RALGPS2   | SOX2 regulated genes in Wounding from PMID: 30772301 | SOX2 |
| 4873 PDCD4     | SOX2 regulated genes in Wounding from PMID: 30772301 | SOX2 |
| 4874 CNST      | SOX2 regulated genes in Wounding from PMID: 30772301 | SOX2 |
| 4875 HNRNPU    | SOX2 regulated genes in Wounding from PMID: 30772301 | SOX2 |
| 4876 ZNF746    | SOX2 regulated genes in Wounding from PMID: 30772301 | SOX2 |
| 4877 TMEM69    | SOX2 regulated genes in Wounding from PMID: 30772301 | SOX2 |
| 4878 WDR47     | SOX2 regulated genes in Wounding from PMID: 30772301 | SOX2 |

|               |                                                      |      |
|---------------|------------------------------------------------------|------|
| 4879 TUBA4A   | SOX2 regulated genes in Wounding from PMID: 30772301 | SOX2 |
| 4880 SYNRG    | SOX2 regulated genes in Wounding from PMID: 30772301 | SOX2 |
| 4881 HECTD1   | SOX2 regulated genes in Wounding from PMID: 30772301 | SOX2 |
| 4882 FADS2    | SOX2 regulated genes in Wounding from PMID: 30772301 | SOX2 |
| 4883 QRICH2   | SOX2 regulated genes in Wounding from PMID: 30772301 | SOX2 |
| 4884 IWS1     | SOX2 regulated genes in Wounding from PMID: 30772301 | SOX2 |
| 4885 SAXO2    | SOX2 regulated genes in Wounding from PMID: 30772301 | SOX2 |
| 4886 IL11     | SOX2 regulated genes in Wounding from PMID: 30772301 | SOX2 |
| 4887 DVL1     | SOX2 regulated genes in Wounding from PMID: 30772301 | SOX2 |
| 4888 BHLHE41  | SOX2 regulated genes in Wounding from PMID: 30772301 | SOX2 |
| 4889 ATP6V0A2 | SOX2 regulated genes in Wounding from PMID: 30772301 | SOX2 |
| 4890 SPINT1   | SOX2 regulated genes in Wounding from PMID: 30772301 | SOX2 |
| 4891 GCLM     | SOX2 regulated genes in Wounding from PMID: 30772301 | SOX2 |
| 4892 CNTN5    | SOX2 regulated genes in Wounding from PMID: 30772301 | SOX2 |
| 4893 BZW2     | SOX2 regulated genes in Wounding from PMID: 30772301 | SOX2 |
| 4894 ST7L     | SOX2 regulated genes in Wounding from PMID: 30772301 | SOX2 |
| 4895 ENOPH1   | SOX2 regulated genes in Wounding from PMID: 30772301 | SOX2 |
| 4896 STX6     | SOX2 regulated genes in Wounding from PMID: 30772301 | SOX2 |
| 4897 FAT1     | SOX2 regulated genes in Wounding from PMID: 30772301 | SOX2 |
| 4898 SDR16C5  | SOX2 regulated genes in Wounding from PMID: 30772301 | SOX2 |
| 4899 ZNF266   | SOX2 regulated genes in Wounding from PMID: 30772301 | SOX2 |
| 4900 POLR2D   | SOX2 regulated genes in Wounding from PMID: 30772301 | SOX2 |
| 4901 CCDC91   | SOX2 regulated genes in Wounding from PMID: 30772301 | SOX2 |
| 4902 PDPN     | SOX2 regulated genes in Wounding from PMID: 30772301 | SOX2 |
| 4903 VANGL1   | SOX2 regulated genes in Wounding from PMID: 30772301 | SOX2 |
| 4904 KCNK12   | SOX2 regulated genes in Wounding from PMID: 30772301 | SOX2 |
| 4905 ITGA6    | SOX2 regulated genes in Wounding from PMID: 30772301 | SOX2 |
| 4906 GPR42    | SOX2 regulated genes in Wounding from PMID: 30772301 | SOX2 |
| 4907 FILIP1L  | SOX2 regulated genes in Wounding from PMID: 30772301 | SOX2 |
| 4908 NDUFAF7  | SOX2 regulated genes in Wounding from PMID: 30772301 | SOX2 |
| 4909 MPP7     | SOX2 regulated genes in Wounding from PMID: 30772301 | SOX2 |
| 4910 MYH14    | SOX2 regulated genes in Wounding from PMID: 30772301 | SOX2 |
| 4911 GTF2F1   | SOX2 regulated genes in Wounding from PMID: 30772301 | SOX2 |
| 4912 DHRS9    | SOX2 regulated genes in Wounding from PMID: 30772301 | SOX2 |
| 4913 MARK1    | SOX2 regulated genes in Wounding from PMID: 30772301 | SOX2 |
| 4914 C12orf56 | SOX2 regulated genes in Wounding from PMID: 30772301 | SOX2 |
| 4915 BNC1     | SOX2 regulated genes in Wounding from PMID: 30772301 | SOX2 |
| 4916 POGK     | SOX2 regulated genes in Wounding from PMID: 30772301 | SOX2 |
| 4917 P4HB     | SOX2 regulated genes in Wounding from PMID: 30772301 | SOX2 |
| 4918 B3GNT8   | SOX2 regulated genes in Wounding from PMID: 30772301 | SOX2 |
| 4919 METTL23  | SOX2 regulated genes in Wounding from PMID: 30772301 | SOX2 |
| 4920 TMED5    | SOX2 regulated genes in Wounding from PMID: 30772301 | SOX2 |
| 4921 SLC4A1   | SOX2 regulated genes in Wounding from PMID: 30772301 | SOX2 |
| 4922 PKP2     | SOX2 regulated genes in Wounding from PMID: 30772301 | SOX2 |
| 4923 GPSM2    | SOX2 regulated genes in Wounding from PMID: 30772301 | SOX2 |
| 4924 ITGB4    | SOX2 regulated genes in Wounding from PMID: 30772301 | SOX2 |
| 4925 CLASP1   | SOX2 regulated genes in Wounding from PMID: 30772301 | SOX2 |
| 4926 SIRT1    | SOX2 regulated genes in Wounding from PMID: 30772301 | SOX2 |
| 4927 CCHCR1   | SOX2 regulated genes in Wounding from PMID: 30772301 | SOX2 |
| 4928 TSG101   | SOX2 regulated genes in Wounding from PMID: 30772301 | SOX2 |
| 4929 MACF1    | SOX2 regulated genes in Wounding from PMID: 30772301 | SOX2 |
| 4930 TRAF4    | SOX2 regulated genes in Wounding from PMID: 30772301 | SOX2 |
| 4931 TXNRD1   | SOX2 regulated genes in Wounding from PMID: 30772301 | SOX2 |
| 4932 ARHGAP22 | SOX2 regulated genes in Wounding from PMID: 30772301 | SOX2 |
| 4933 INTS14   | SOX2 regulated genes in Wounding from PMID: 30772301 | SOX2 |
| 4934 CLK3     | SOX2 regulated genes in Wounding from PMID: 30772301 | SOX2 |
| 4935 EGR1     | SOX2 regulated genes in Wounding from PMID: 30772301 | SOX2 |
| 4936 ECD      | SOX2 regulated genes in Wounding from PMID: 30772301 | SOX2 |
| 4937 MYH15    | SOX2 regulated genes in Wounding from PMID: 30772301 | SOX2 |
| 4938 NSUN2    | SOX2 regulated genes in Wounding from PMID: 30772301 | SOX2 |
| 4939 GEMIN4   | SOX2 regulated genes in Wounding from PMID: 30772301 | SOX2 |

|               |                                                      |      |
|---------------|------------------------------------------------------|------|
| 4940 LAD1     | SOX2 regulated genes in Wounding from PMID: 30772301 | SOX2 |
| 4941 RBBP6    | SOX2 regulated genes in Wounding from PMID: 30772301 | SOX2 |
| 4942 ATXN7L3  | SOX2 regulated genes in Wounding from PMID: 30772301 | SOX2 |
| 4943 PPP2CB   | SOX2 regulated genes in Wounding from PMID: 30772301 | SOX2 |
| 4944 SPPL3    | SOX2 regulated genes in Wounding from PMID: 30772301 | SOX2 |
| 4945 SNAPC3   | SOX2 regulated genes in Wounding from PMID: 30772301 | SOX2 |
| 4946 FBXO46   | SOX2 regulated genes in Wounding from PMID: 30772301 | SOX2 |
| 4947 PDXDC1   | SOX2 regulated genes in Wounding from PMID: 30772301 | SOX2 |
| 4948 HGS      | SOX2 regulated genes in Wounding from PMID: 30772301 | SOX2 |
| 4949 STEAP1   | SOX2 regulated genes in Wounding from PMID: 30772301 | SOX2 |
| 4950 KCTD5    | SOX2 regulated genes in Wounding from PMID: 30772301 | SOX2 |
| 4951 PRSS22   | SOX2 regulated genes in Wounding from PMID: 30772301 | SOX2 |
| 4952 PLXNA1   | SOX2 regulated genes in Wounding from PMID: 30772301 | SOX2 |
| 4953 STRIP1   | SOX2 regulated genes in Wounding from PMID: 30772301 | SOX2 |
| 4954 DLG1     | SOX2 regulated genes in Wounding from PMID: 30772301 | SOX2 |
| 4955 TP63     | SOX2 regulated genes in Wounding from PMID: 30772301 | SOX2 |
| 4956 USP43    | SOX2 regulated genes in Wounding from PMID: 30772301 | SOX2 |
| 4957 MGST3    | SOX2 regulated genes in Wounding from PMID: 30772301 | SOX2 |
| 4958 ANKRD13B | SOX2 regulated genes in Wounding from PMID: 30772301 | SOX2 |
| 4959 MPZL1    | SOX2 regulated genes in Wounding from PMID: 30772301 | SOX2 |
| 4960 SMURF2   | SOX2 regulated genes in Wounding from PMID: 30772301 | SOX2 |
| 4961 PRPF3    | SOX2 regulated genes in Wounding from PMID: 30772301 | SOX2 |
| 4962 RBM45    | SOX2 regulated genes in Wounding from PMID: 30772301 | SOX2 |
| 4963 SLC30A1  | SOX2 regulated genes in Wounding from PMID: 30772301 | SOX2 |
| 4964 SHH      | SOX2 regulated genes in Wounding from PMID: 30772301 | SOX2 |
| 4965 SLC7A8   | SOX2 regulated genes in Wounding from PMID: 30772301 | SOX2 |
| 4966 PHACTR1  | SOX2 regulated genes in Wounding from PMID: 30772301 | SOX2 |
| 4967 BPNT1    | SOX2 regulated genes in Wounding from PMID: 30772301 | SOX2 |
| 4968 PCDHGB1  | SOX2 regulated genes in Wounding from PMID: 30772301 | SOX2 |
| 4969 PSMD7    | SOX2 regulated genes in Wounding from PMID: 30772301 | SOX2 |
| 4970 PELI1    | SOX2 regulated genes in Wounding from PMID: 30772301 | SOX2 |
| 4971 ZNF800   | SOX2 regulated genes in Wounding from PMID: 30772301 | SOX2 |
| 4972 FCAMR    | SOX2 regulated genes in Wounding from PMID: 30772301 | SOX2 |
| 4973 DDX1     | SOX2 regulated genes in Wounding from PMID: 30772301 | SOX2 |
| 4974 PPIP5K1  | SOX2 regulated genes in Wounding from PMID: 30772301 | SOX2 |
| 4975 RHOU     | SOX2 regulated genes in Wounding from PMID: 30772301 | SOX2 |
| 4976 UBA5     | SOX2 regulated genes in Wounding from PMID: 30772301 | SOX2 |
| 4977 LRRFIP1  | SOX2 regulated genes in Wounding from PMID: 30772301 | SOX2 |
| 4978 NIPAL4   | SOX2 regulated genes in Wounding from PMID: 30772301 | SOX2 |
| 4979 PDK1     | SOX2 regulated genes in Wounding from PMID: 30772301 | SOX2 |
| 4980 TMEM40   | SOX2 regulated genes in Wounding from PMID: 30772301 | SOX2 |
| 4981 NME6     | SOX2 regulated genes in Wounding from PMID: 30772301 | SOX2 |
| 4982 SLC27A6  | SOX2 regulated genes in Wounding from PMID: 30772301 | SOX2 |
| 4983 PGAP1    | SOX2 regulated genes in Wounding from PMID: 30772301 | SOX2 |
| 4984 KCTD11   | SOX2 regulated genes in Wounding from PMID: 30772301 | SOX2 |
| 4985 POMGNT1  | SOX2 regulated genes in Wounding from PMID: 30772301 | SOX2 |
| 4986 PRMT1    | SOX2 regulated genes in Wounding from PMID: 30772301 | SOX2 |
| 4987 PDLIM4   | SOX2 regulated genes in Wounding from PMID: 30772301 | SOX2 |
| 4988 CHMP4C   | SOX2 regulated genes in Wounding from PMID: 30772301 | SOX2 |
| 4989 SLC44A2  | SOX2 regulated genes in Wounding from PMID: 30772301 | SOX2 |
| 4990 LUZP1    | SOX2 regulated genes in Wounding from PMID: 30772301 | SOX2 |
| 4991 TWF1     | SOX2 regulated genes in Wounding from PMID: 30772301 | SOX2 |
| 4992 CTSE     | SOX2 regulated genes in Wounding from PMID: 30772301 | SOX2 |
| 4993 CDC42BPA | SOX2 regulated genes in Wounding from PMID: 30772301 | SOX2 |
| 4994 SSR2     | SOX2 regulated genes in Wounding from PMID: 30772301 | SOX2 |
| 4995 LIMA1    | SOX2 regulated genes in Wounding from PMID: 30772301 | SOX2 |
| 4996 EFNA4    | SOX2 regulated genes in Wounding from PMID: 30772301 | SOX2 |
| 4997 GUCY2C   | SOX2 regulated genes in Wounding from PMID: 30772301 | SOX2 |
| 4998 ATP1B1   | SOX2 regulated genes in Wounding from PMID: 30772301 | SOX2 |
| 4999 EFNA1    | SOX2 regulated genes in Wounding from PMID: 30772301 | SOX2 |
| 5000 GTF2IRD1 | SOX2 regulated genes in Wounding from PMID: 30772301 | SOX2 |

|              |                                                      |      |
|--------------|------------------------------------------------------|------|
| 5001 PSME3   | SOX2 regulated genes in Wounding from PMID: 30772301 | SOX2 |
| 5002 MKRN2OS | SOX2 regulated genes in Wounding from PMID: 30772301 | SOX2 |
| 5003 B3GNT5  | SOX2 regulated genes in Wounding from PMID: 30772301 | SOX2 |
| 5004 CNTN2   | SOX2 regulated genes in Wounding from PMID: 30772301 | SOX2 |
| 5005 KLC3    | SOX2 regulated genes in Wounding from PMID: 30772301 | SOX2 |
| 5006 HIP1R   | SOX2 regulated genes in Wounding from PMID: 30772301 | SOX2 |
| 5007 EFNA5   | SOX2 regulated genes in Wounding from PMID: 30772301 | SOX2 |
| 5008 DAZAP1  | SOX2 regulated genes in Wounding from PMID: 30772301 | SOX2 |
| 5009 PRKAR1A | SOX2 regulated genes in Wounding from PMID: 30772301 | SOX2 |
| 5010 NAV2    | SOX2 regulated genes in Wounding from PMID: 30772301 | SOX2 |
| 5011 RANBP10 | SOX2 regulated genes in Wounding from PMID: 30772301 | SOX2 |
| 5012 PFN2    | SOX2 regulated genes in Wounding from PMID: 30772301 | SOX2 |
| 5013 SNX16   | SOX2 regulated genes in Wounding from PMID: 30772301 | SOX2 |
| 5014 NME1    | SOX2 regulated genes in Wounding from PMID: 30772301 | SOX2 |
| 5015 FYTDD1  | SOX2 regulated genes in Wounding from PMID: 30772301 | SOX2 |
| 5016 BEAN1   | SOX2 regulated genes in Wounding from PMID: 30772301 | SOX2 |
| 5017 SORT1   | SOX2 regulated genes in Wounding from PMID: 30772301 | SOX2 |
| 5018 NCMAP   | SOX2 regulated genes in Wounding from PMID: 30772301 | SOX2 |
| 5019 LTBP3   | SOX2 regulated genes in Wounding from PMID: 30772301 | SOX2 |
| 5020 B3GNT2  | SOX2 regulated genes in Wounding from PMID: 30772301 | SOX2 |
| 5021 CCDC124 | SOX2 regulated genes in Wounding from PMID: 30772301 | SOX2 |
| 5022 CLDN4   | SOX2 regulated genes in Wounding from PMID: 30772301 | SOX2 |
| 5023 SHF     | SOX2 regulated genes in Wounding from PMID: 30772301 | SOX2 |
| 5024 RPL29   | SOX2 regulated genes in Wounding from PMID: 30772301 | SOX2 |
| 5025 COQ10B  | SOX2 regulated genes in Wounding from PMID: 30772301 | SOX2 |
| 5026 FAM187B | SOX2 regulated genes in Wounding from PMID: 30772301 | SOX2 |
| 5027 PSMD8   | SOX2 regulated genes in Wounding from PMID: 30772301 | SOX2 |
| 5028 GATAD2A | SOX2 regulated genes in Wounding from PMID: 30772301 | SOX2 |
| 5029 TUBB3   | SOX2 regulated genes in Wounding from PMID: 30772301 | SOX2 |
| 5030 BZW1    | SOX2 regulated genes in Wounding from PMID: 30772301 | SOX2 |
| 5031 KDM5B   | SOX2 regulated genes in Wounding from PMID: 30772301 | SOX2 |
| 5032 TMEM222 | SOX2 regulated genes in Wounding from PMID: 30772301 | SOX2 |
| 5033 HAUS8   | SOX2 regulated genes in Wounding from PMID: 30772301 | SOX2 |
| 5034 IL20    | SOX2 regulated genes in Wounding from PMID: 30772301 | SOX2 |
| 5035 TIGD5   | SOX2 regulated genes in Wounding from PMID: 30772301 | SOX2 |
| 5036 FBXO28  | SOX2 regulated genes in Wounding from PMID: 30772301 | SOX2 |
| 5037 VSIG8   | SOX2 regulated genes in Wounding from PMID: 30772301 | SOX2 |
| 5038 FBXO38  | SOX2 regulated genes in Wounding from PMID: 30772301 | SOX2 |
| 5039 CSNK1D  | SOX2 regulated genes in Wounding from PMID: 30772301 | SOX2 |
| 5040 FOXN1   | SOX2 regulated genes in Wounding from PMID: 30772301 | SOX2 |
| 5041 WNT3A   | SOX2 regulated genes in Wounding from PMID: 30772301 | SOX2 |
| 5042 EAF1    | SOX2 regulated genes in Wounding from PMID: 30772301 | SOX2 |
| 5043 TOP2B   | SOX2 regulated genes in Wounding from PMID: 30772301 | SOX2 |
| 5044 NGEF    | SOX2 regulated genes in Wounding from PMID: 30772301 | SOX2 |
| 5045 LRRC59  | SOX2 regulated genes in Wounding from PMID: 30772301 | SOX2 |
| 5046 TTC13   | SOX2 regulated genes in Wounding from PMID: 30772301 | SOX2 |
| 5047 WDR77   | SOX2 regulated genes in Wounding from PMID: 30772301 | SOX2 |
| 5048 S100A3  | SOX2 regulated genes in Wounding from PMID: 30772301 | SOX2 |
| 5049 GNAI3   | SOX2 regulated genes in Wounding from PMID: 30772301 | SOX2 |
| 5050 KRT27   | SOX2 regulated genes in Wounding from PMID: 30772301 | SOX2 |
| 5051 DIS3L   | SOX2 regulated genes in Wounding from PMID: 30772301 | SOX2 |
| 5052 GAB1    | SOX2 regulated genes in Wounding from PMID: 30772301 | SOX2 |
| 5053 DDX5    | SOX2 regulated genes in Wounding from PMID: 30772301 | SOX2 |
| 5054 UBTF    | SOX2 regulated genes in Wounding from PMID: 30772301 | SOX2 |
| 5055 TXLNA   | SOX2 regulated genes in Wounding from PMID: 30772301 | SOX2 |
| 5056 MEMO1   | SOX2 regulated genes in Wounding from PMID: 30772301 | SOX2 |
| 5057 CRABP2  | SOX2 regulated genes in Wounding from PMID: 30772301 | SOX2 |
| 5058 DEDD2   | SOX2 regulated genes in Wounding from PMID: 30772301 | SOX2 |
| 5059 TPRG1   | SOX2 regulated genes in Wounding from PMID: 30772301 | SOX2 |
| 5060 MYO6    | SOX2 regulated genes in Wounding from PMID: 30772301 | SOX2 |
| 5061 HOOK1   | SOX2 regulated genes in Wounding from PMID: 30772301 | SOX2 |

|               |                                                      |      |
|---------------|------------------------------------------------------|------|
| 5062 SEMA6A   | SOX2 regulated genes in Wounding from PMID: 30772301 | SOX2 |
| 5063 TEPP     | SOX2 regulated genes in Wounding from PMID: 30772301 | SOX2 |
| 5064 SMAD3    | SOX2 regulated genes in Wounding from PMID: 30772301 | SOX2 |
| 5065 REEP5    | SOX2 regulated genes in Wounding from PMID: 30772301 | SOX2 |
| 5066 C1QL1    | SOX2 regulated genes in Wounding from PMID: 30772301 | SOX2 |
| 5067 ECE1     | SOX2 regulated genes in Wounding from PMID: 30772301 | SOX2 |
| 5068 HINFP    | SOX2 regulated genes in Wounding from PMID: 30772301 | SOX2 |
| 5069 KRT18    | SOX2 regulated genes in Wounding from PMID: 30772301 | SOX2 |
| 5070 ARF6     | SOX2 regulated genes in Wounding from PMID: 30772301 | SOX2 |
| 5071 GSK3B    | SOX2 regulated genes in Wounding from PMID: 30772301 | SOX2 |
| 5072 DUSP10   | SOX2 regulated genes in Wounding from PMID: 30772301 | SOX2 |
| 5073 SEC61A1  | SOX2 regulated genes in Wounding from PMID: 30772301 | SOX2 |
| 5074 FBXW11   | SOX2 regulated genes in Wounding from PMID: 30772301 | SOX2 |
| 5075 SF3B4    | SOX2 regulated genes in Wounding from PMID: 30772301 | SOX2 |
| 5076 ATP2C1   | SOX2 regulated genes in Wounding from PMID: 30772301 | SOX2 |
| 5077 KRT36    | SOX2 regulated genes in Wounding from PMID: 30772301 | SOX2 |
| 5078 HEYL     | SOX2 regulated genes in Wounding from PMID: 30772301 | SOX2 |
| 5079 PHC2     | SOX2 regulated genes in Wounding from PMID: 30772301 | SOX2 |
| 5080 UBE2I    | SOX2 regulated genes in Wounding from PMID: 30772301 | SOX2 |
| 5081 KCNH1    | SOX2 regulated genes in Wounding from PMID: 30772301 | SOX2 |
| 5082 PPP1R13L | SOX2 regulated genes in Wounding from PMID: 30772301 | SOX2 |
| 5083 PPM1D    | SOX2 regulated genes in Wounding from PMID: 30772301 | SOX2 |
| 5084 ACP5     | SOX2 regulated genes in Wounding from PMID: 30772301 | SOX2 |
| 5085 MRGPRX3  | SOX2 regulated genes in Wounding from PMID: 30772301 | SOX2 |
| 5086 CHMP2B   | SOX2 regulated genes in Wounding from PMID: 30772301 | SOX2 |
| 5087 PIWIL2   | SOX2 regulated genes in Wounding from PMID: 30772301 | SOX2 |
| 5088 ATP11B   | SOX2 regulated genes in Wounding from PMID: 30772301 | SOX2 |
| 5089 CFAP57   | SOX2 regulated genes in Wounding from PMID: 30772301 | SOX2 |
| 5090 EIF5A    | SOX2 regulated genes in Wounding from PMID: 30772301 | SOX2 |
| 5091 TFG      | SOX2 regulated genes in Wounding from PMID: 30772301 | SOX2 |
| 5092 RAB34    | SOX2 regulated genes in Wounding from PMID: 30772301 | SOX2 |
| 5093 ATOH7    | SOX2 regulated genes in Wounding from PMID: 30772301 | SOX2 |
| 5094 KLK7     | SOX2 regulated genes in Wounding from PMID: 30772301 | SOX2 |
| 5095 PLEKHG6  | SOX2 regulated genes in Wounding from PMID: 30772301 | SOX2 |
| 5096 ARAP2    | SOX2 regulated genes in Wounding from PMID: 30772301 | SOX2 |
| 5097 PIAS4    | SOX2 regulated genes in Wounding from PMID: 30772301 | SOX2 |
| 5098 ABCB11   | SOX2 regulated genes in Wounding from PMID: 30772301 | SOX2 |
| 5099 CLDN1    | SOX2 regulated genes in Wounding from PMID: 30772301 | SOX2 |
| 5100 LAMB3    | SOX2 regulated genes in Wounding from PMID: 30772301 | SOX2 |
| 5101 HAS1     | SOX2 regulated genes in Wounding from PMID: 30772301 | SOX2 |
| 5102 VTCN1    | SOX2 regulated genes in Wounding from PMID: 30772301 | SOX2 |
| 5103 UBE2F    | SOX2 regulated genes in Wounding from PMID: 30772301 | SOX2 |
| 5104 MUC1     | SOX2 regulated genes in Wounding from PMID: 30772301 | SOX2 |
| 5105 TSC22D2  | SOX2 regulated genes in Wounding from PMID: 30772301 | SOX2 |
| 5106 ACTL6A   | SOX2 regulated genes in Wounding from PMID: 30772301 | SOX2 |
| 5107 TNRC18   | SOX2 regulated genes in Wounding from PMID: 30772301 | SOX2 |
| 5108 DCAKD    | SOX2 regulated genes in Wounding from PMID: 30772301 | SOX2 |
| 5109 LPAR3    | SOX2 regulated genes in Wounding from PMID: 30772301 | SOX2 |
| 5110 NIF3L1   | SOX2 regulated genes in Wounding from PMID: 30772301 | SOX2 |
| 5111 TAF13    | SOX2 regulated genes in Wounding from PMID: 30772301 | SOX2 |
| 5112 PCDH1    | SOX2 regulated genes in Wounding from PMID: 30772301 | SOX2 |
| 5113 RTN4     | SOX2 regulated genes in Wounding from PMID: 30772301 | SOX2 |
| 5114 ZPR1     | SOX2 regulated genes in Wounding from PMID: 30772301 | SOX2 |
| 5115 E2F2     | SOX2 regulated genes in Wounding from PMID: 30772301 | SOX2 |
| 5116 GRAMD1C  | SOX2 regulated genes in Wounding from PMID: 30772301 | SOX2 |
| 5117 GCNT2    | SOX2 regulated genes in Wounding from PMID: 30772301 | SOX2 |
| 5118 RGMA     | SOX2 regulated genes in Wounding from PMID: 30772301 | SOX2 |
| 5119 MXD1     | SOX2 regulated genes in Wounding from PMID: 30772301 | SOX2 |
| 5120 MEX3A    | SOX2 regulated genes in Wounding from PMID: 30772301 | SOX2 |
| 5121 DYRK3    | SOX2 regulated genes in Wounding from PMID: 30772301 | SOX2 |
| 5122 RNF11    | SOX2 regulated genes in Wounding from PMID: 30772301 | SOX2 |

|      |          |                                                                         |      |
|------|----------|-------------------------------------------------------------------------|------|
| 5123 | USP2     | SOX2 regulated genes in Wounding from PMID: 30772301                    | SOX2 |
| 5124 | FSCN2    | SOX2 regulated genes in Wounding from PMID: 30772301                    | SOX2 |
| 5125 | PGBD1    | SOX2 regulated genes in Wounding from PMID: 30772301                    | SOX2 |
| 5126 | IFNLR1   | SOX2 regulated genes in Wounding from PMID: 30772301                    | SOX2 |
| 5127 | EMP2     | SOX2 regulated genes in Wounding from PMID: 30772301                    | SOX2 |
| 5128 | ACOT7    | SOX2 regulated genes in Wounding from PMID: 30772301                    | SOX2 |
| 5129 | NTF4     | SOX2 regulated genes in Wounding from PMID: 30772301                    | SOX2 |
| 5130 | SLCO2A1  | SOX2 regulated genes in Wounding from PMID: 30772301                    | SOX2 |
| 5131 | TSPAN1   | SOX2 regulated genes in Wounding from PMID: 30772301                    | SOX2 |
| 5132 | HNRNPF   | SOX2 regulated genes in Wounding from PMID: 30772301                    | SOX2 |
| 5133 | MYO1B    | SOX2 regulated genes in Wounding from PMID: 30772301                    | SOX2 |
| 5134 | DHX29    | SOX2 regulated genes in Wounding from PMID: 30772301                    | SOX2 |
| 5135 | HOMER3   | SOX2 regulated genes in Wounding from PMID: 30772301                    | SOX2 |
| 5136 | RIMS1    | SOX2 regulated genes in Wounding from PMID: 30772301                    | SOX2 |
| 5137 | F11R     | SOX2 regulated genes in Wounding from PMID: 30772301                    | SOX2 |
| 5138 | PHYHIP   | SOX2 regulated genes in Wounding from PMID: 30772301                    | SOX2 |
| 5139 | ERC1     | SOX2 regulated genes in Wounding from PMID: 30772301                    | SOX2 |
| 5140 | SLC45A3  | SOX2 regulated genes in Wounding from PMID: 30772301                    | SOX2 |
| 5141 | GPR12    | SOX2 regulated genes in Keratinocyte Overexpression from PMID: 30772301 | SOX2 |
| 5142 | ZNF512B  | SOX2 regulated genes in Keratinocyte Overexpression from PMID: 30772301 | SOX2 |
| 5143 | PWP2     | SOX2 regulated genes in Keratinocyte Overexpression from PMID: 30772301 | SOX2 |
| 5144 | RAB27B   | SOX2 regulated genes in Keratinocyte Overexpression from PMID: 30772301 | SOX2 |
| 5145 | MZT1     | SOX2 regulated genes in Keratinocyte Overexpression from PMID: 30772301 | SOX2 |
| 5146 | SYN3     | SOX2 regulated genes in Keratinocyte Overexpression from PMID: 30772301 | SOX2 |
| 5147 | USP12    | SOX2 regulated genes in Keratinocyte Overexpression from PMID: 30772301 | SOX2 |
| 5148 | ARL5B    | SOX2 regulated genes in Keratinocyte Overexpression from PMID: 30772301 | SOX2 |
| 5149 | PCGF3    | SOX2 regulated genes in Keratinocyte Overexpression from PMID: 30772301 | SOX2 |
| 5150 | HORMAD2  | SOX2 regulated genes in Keratinocyte Overexpression from PMID: 30772301 | SOX2 |
| 5151 | LIPG     | SOX2 regulated genes in Keratinocyte Overexpression from PMID: 30772301 | SOX2 |
| 5152 | YES1     | SOX2 regulated genes in Keratinocyte Overexpression from PMID: 30772301 | SOX2 |
| 5153 | UNC79    | SOX2 regulated genes in Keratinocyte Overexpression from PMID: 30772301 | SOX2 |
| 5154 | ZBTB21   | SOX2 regulated genes in Keratinocyte Overexpression from PMID: 30772301 | SOX2 |
| 5155 | GTPBP6   | SOX2 regulated genes in Keratinocyte Overexpression from PMID: 30772301 | SOX2 |
| 5156 | CPLX1    | SOX2 regulated genes in Keratinocyte Overexpression from PMID: 30772301 | SOX2 |
| 5157 | ATG2B    | SOX2 regulated genes in Keratinocyte Overexpression from PMID: 30772301 | SOX2 |
| 5158 | SMOX     | SOX2 regulated genes in Keratinocyte Overexpression from PMID: 30772301 | SOX2 |
| 5159 | CLDN17   | SOX2 regulated genes in Keratinocyte Overexpression from PMID: 30772301 | SOX2 |
| 5160 | DCAF4    | SOX2 regulated genes in Keratinocyte Overexpression from PMID: 30772301 | SOX2 |
| 5161 | MOCOS    | SOX2 regulated genes in Keratinocyte Overexpression from PMID: 30772301 | SOX2 |
| 5162 | PBDC1    | SOX2 regulated genes in Keratinocyte Overexpression from PMID: 30772301 | SOX2 |
| 5163 | PRELID3B | SOX2 regulated genes in Keratinocyte Overexpression from PMID: 30772301 | SOX2 |
| 5164 | MEX3C    | SOX2 regulated genes in Keratinocyte Overexpression from PMID: 30772301 | SOX2 |
| 5165 | EVA1C    | SOX2 regulated genes in Keratinocyte Overexpression from PMID: 30772301 | SOX2 |
| 5166 | PSMA7    | SOX2 regulated genes in Keratinocyte Overexpression from PMID: 30772301 | SOX2 |
| 5167 | NUDT5    | SOX2 regulated genes in Keratinocyte Overexpression from PMID: 30772301 | SOX2 |
| 5168 | VBP1     | SOX2 regulated genes in Keratinocyte Overexpression from PMID: 30772301 | SOX2 |
| 5169 | SLC25A43 | SOX2 regulated genes in Keratinocyte Overexpression from PMID: 30772301 | SOX2 |
| 5170 | TLL1     | SOX2 regulated genes in Keratinocyte Overexpression from PMID: 30772301 | SOX2 |
| 5171 | SIM2     | SOX2 regulated genes in Keratinocyte Overexpression from PMID: 30772301 | SOX2 |
| 5172 | RRP1B    | SOX2 regulated genes in Keratinocyte Overexpression from PMID: 30772301 | SOX2 |
| 5173 | CEP76    | SOX2 regulated genes in Keratinocyte Overexpression from PMID: 30772301 | SOX2 |
| 5174 | PCNX4    | SOX2 regulated genes in Keratinocyte Overexpression from PMID: 30772301 | SOX2 |
| 5175 | ZFP64    | SOX2 regulated genes in Keratinocyte Overexpression from PMID: 30772301 | SOX2 |
| 5176 | TAF4B    | SOX2 regulated genes in Keratinocyte Overexpression from PMID: 30772301 | SOX2 |
| 5177 | SKA1     | SOX2 regulated genes in Keratinocyte Overexpression from PMID: 30772301 | SOX2 |
| 5178 | PROSER1  | SOX2 regulated genes in Keratinocyte Overexpression from PMID: 30772301 | SOX2 |
| 5179 | TTC6     | SOX2 regulated genes in Keratinocyte Overexpression from PMID: 30772301 | SOX2 |
| 5180 | NFX1     | SOX2 regulated genes in Keratinocyte Overexpression from PMID: 30772301 | SOX2 |
| 5181 | POMP     | SOX2 regulated genes in Keratinocyte Overexpression from PMID: 30772301 | SOX2 |
| 5182 | SCAF4    | SOX2 regulated genes in Keratinocyte Overexpression from PMID: 30772301 | SOX2 |
| 5183 | LINGO2   | SOX2 regulated genes in Keratinocyte Overexpression from PMID: 30772301 | SOX2 |

|               |                                                                         |      |
|---------------|-------------------------------------------------------------------------|------|
| 5184 PPP6R2   | SOX2 regulated genes in Keratinocyte Overexpression from PMID: 30772301 | SOX2 |
| 5185 SEC23B   | SOX2 regulated genes in Keratinocyte Overexpression from PMID: 30772301 | SOX2 |
| 5186 RALY     | SOX2 regulated genes in Keratinocyte Overexpression from PMID: 30772301 | SOX2 |
| 5187 PDE9A    | SOX2 regulated genes in Keratinocyte Overexpression from PMID: 30772301 | SOX2 |
| 5188 HAUS6    | SOX2 regulated genes in Keratinocyte Overexpression from PMID: 30772301 | SOX2 |
| 5189 ANKRD9   | SOX2 regulated genes in Keratinocyte Overexpression from PMID: 30772301 | SOX2 |
| 5190 RBX1     | SOX2 regulated genes in Keratinocyte Overexpression from PMID: 30772301 | SOX2 |
| 5191 MNAT1    | SOX2 regulated genes in Keratinocyte Overexpression from PMID: 30772301 | SOX2 |
| 5192 BEX3     | SOX2 regulated genes in Keratinocyte Overexpression from PMID: 30772301 | SOX2 |
| 5193 PSPC1    | SOX2 regulated genes in Keratinocyte Overexpression from PMID: 30772301 | SOX2 |
| 5194 BMP7     | SOX2 regulated genes in Keratinocyte Overexpression from PMID: 30772301 | SOX2 |
| 5195 RPS21    | SOX2 regulated genes in Keratinocyte Overexpression from PMID: 30772301 | SOX2 |
| 5196 SCEL     | SOX2 regulated genes in Keratinocyte Overexpression from PMID: 30772301 | SOX2 |
| 5197 PCDH8    | SOX2 regulated genes in Keratinocyte Overexpression from PMID: 30772301 | SOX2 |
| 5198 PSIP1    | SOX2 regulated genes in Keratinocyte Overexpression from PMID: 30772301 | SOX2 |
| 5199 NUFIP1   | SOX2 regulated genes in Keratinocyte Overexpression from PMID: 30772301 | SOX2 |
| 5200 XKRX     | SOX2 regulated genes in Keratinocyte Overexpression from PMID: 30772301 | SOX2 |
| 5201 CSTB     | SOX2 regulated genes in Keratinocyte Overexpression from PMID: 30772301 | SOX2 |
| 5202 GTF3A    | SOX2 regulated genes in Keratinocyte Overexpression from PMID: 30772301 | SOX2 |
| 5203 CDKN2B   | SOX2 regulated genes in Keratinocyte Overexpression from PMID: 30772301 | SOX2 |
| 5204 CDC123   | SOX2 regulated genes in Keratinocyte Overexpression from PMID: 30772301 | SOX2 |
| 5205 PAN3     | SOX2 regulated genes in Keratinocyte Overexpression from PMID: 30772301 | SOX2 |
| 5206 HOPX     | SOX2 regulated genes in Keratinocyte Overexpression from PMID: 30772301 | SOX2 |
| 5207 TP53INP2 | SOX2 regulated genes in Keratinocyte Overexpression from PMID: 30772301 | SOX2 |
| 5208 WDR1     | SOX2 regulated genes in Keratinocyte Overexpression from PMID: 30772301 | SOX2 |
| 5209 GID8     | SOX2 regulated genes in Keratinocyte Overexpression from PMID: 30772301 | SOX2 |
| 5210 POLR3F   | SOX2 regulated genes in Keratinocyte Overexpression from PMID: 30772301 | SOX2 |
| 5211 MAGEE2   | SOX2 regulated genes in Keratinocyte Overexpression from PMID: 30772301 | SOX2 |
| 5212 MOK      | SOX2 regulated genes in Keratinocyte Overexpression from PMID: 30772301 | SOX2 |
| 5213 HMGN5    | SOX2 regulated genes in Keratinocyte Overexpression from PMID: 30772301 | SOX2 |
| 5214 NUP50    | SOX2 regulated genes in Keratinocyte Overexpression from PMID: 30772301 | SOX2 |
| 5215 MRPL39   | SOX2 regulated genes in Keratinocyte Overexpression from PMID: 30772301 | SOX2 |
| 5216 RPRD1B   | SOX2 regulated genes in Keratinocyte Overexpression from PMID: 30772301 | SOX2 |
| 5217 DHX15    | SOX2 regulated genes in Keratinocyte Overexpression from PMID: 30772301 | SOX2 |
| 5218 UPF2     | SOX2 regulated genes in Keratinocyte Overexpression from PMID: 30772301 | SOX2 |
| 5219 CDC42BPB | SOX2 regulated genes in Keratinocyte Overexpression from PMID: 30772301 | SOX2 |
| 5220 RPS4X    | SOX2 regulated genes in Keratinocyte Overexpression from PMID: 30772301 | SOX2 |
| 5221 CITED1   | SOX2 regulated genes in Keratinocyte Overexpression from PMID: 30772301 | SOX2 |
| 5222 RNF152   | SOX2 regulated genes in Keratinocyte Overexpression from PMID: 30772301 | SOX2 |
| 5223 RFC3     | SOX2 regulated genes in Keratinocyte Overexpression from PMID: 30772301 | SOX2 |
| 5224 RBM17    | SOX2 regulated genes in Keratinocyte Overexpression from PMID: 30772301 | SOX2 |
| 5225 SPATA2   | SOX2 regulated genes in Keratinocyte Overexpression from PMID: 30772301 | SOX2 |
| 5226 KIN      | SOX2 regulated genes in Keratinocyte Overexpression from PMID: 30772301 | SOX2 |
| 5227 MIS18BP1 | SOX2 regulated genes in Keratinocyte Overexpression from PMID: 30772301 | SOX2 |
| 5228 PRR14L   | SOX2 regulated genes in Keratinocyte Overexpression from PMID: 30772301 | SOX2 |
| 5229 HAUS1    | SOX2 regulated genes in Keratinocyte Overexpression from PMID: 30772301 | SOX2 |
| 5230 CDC42EP1 | SOX2 regulated genes in Keratinocyte Overexpression from PMID: 30772301 | SOX2 |
| 5231 CRYL1    | SOX2 regulated genes in Keratinocyte Overexpression from PMID: 30772301 | SOX2 |
| 5232 AMER1    | SOX2 regulated genes in Keratinocyte Overexpression from PMID: 30772301 | SOX2 |
| 5233 YY1      | SOX2 regulated genes in Keratinocyte Overexpression from PMID: 30772301 | SOX2 |
| 5234 NOL12    | SOX2 regulated genes in Keratinocyte Overexpression from PMID: 30772301 | SOX2 |
| 5235 PSMG1    | SOX2 regulated genes in Keratinocyte Overexpression from PMID: 30772301 | SOX2 |
| 5236 SLC19A1  | SOX2 regulated genes in Keratinocyte Overexpression from PMID: 30772301 | SOX2 |
| 5237 SLC25A17 | SOX2 regulated genes in Keratinocyte Overexpression from PMID: 30772301 | SOX2 |
| 5238 BTG3     | SOX2 regulated genes in Keratinocyte Overexpression from PMID: 30772301 | SOX2 |
| 5239 YBEY     | SOX2 regulated genes in Keratinocyte Overexpression from PMID: 30772301 | SOX2 |
| 5240 ISM1     | SOX2 regulated genes in Keratinocyte Overexpression from PMID: 30772301 | SOX2 |
| 5241 SSTR1    | SOX2 regulated genes in Keratinocyte Overexpression from PMID: 30772301 | SOX2 |
| 5242 CTNBL1   | SOX2 regulated genes in Keratinocyte Overexpression from PMID: 30772301 | SOX2 |
| 5243 DSG3     | SOX2 regulated genes in Keratinocyte Overexpression from PMID: 30772301 | SOX2 |
| 5244 BTBD7    | SOX2 regulated genes in Keratinocyte Overexpression from PMID: 30772301 | SOX2 |



|               |                                                                         |      |
|---------------|-------------------------------------------------------------------------|------|
| 5245 TUBAL3   | SOX2 regulated genes in Keratinocyte Overexpression from PMID: 30772301 | SOX2 |
| 5246 ATP5F1A  | SOX2 regulated genes in Keratinocyte Overexpression from PMID: 30772301 | SOX2 |
| 5247 BTBD3    | SOX2 regulated genes in Keratinocyte Overexpression from PMID: 30772301 | SOX2 |
| 5248 MAFF     | SOX2 regulated genes in Keratinocyte Overexpression from PMID: 30772301 | SOX2 |
| 5249 DOK5     | SOX2 regulated genes in Keratinocyte Overexpression from PMID: 30772301 | SOX2 |
| 5250 U2AF1    | SOX2 regulated genes in Keratinocyte Overexpression from PMID: 30772301 | SOX2 |
| 5251 NUDT11   | SOX2 regulated genes in Keratinocyte Overexpression from PMID: 30772301 | SOX2 |
| 5252 DLG3     | SOX2 regulated genes in Keratinocyte Overexpression from PMID: 30772301 | SOX2 |
| 5253 BRWD1    | SOX2 regulated genes in Keratinocyte Overexpression from PMID: 30772301 | SOX2 |
| 5254 MORC4    | SOX2 regulated genes in Keratinocyte Overexpression from PMID: 30772301 | SOX2 |
| 5255 SMU1     | SOX2 regulated genes in Keratinocyte Overexpression from PMID: 30772301 | SOX2 |
| 5256 TSR2     | SOX2 regulated genes in Keratinocyte Overexpression from PMID: 30772301 | SOX2 |
| 5257 FANCM    | SOX2 regulated genes in Keratinocyte Overexpression from PMID: 30772301 | SOX2 |
| 5258 DMRTA1   | SOX2 regulated genes in Keratinocyte Overexpression from PMID: 30772301 | SOX2 |
| 5259 RBBP8NL  | SOX2 regulated genes in Keratinocyte Overexpression from PMID: 30772301 | SOX2 |
| 5260 TASP1    | SOX2 regulated genes in Keratinocyte Overexpression from PMID: 30772301 | SOX2 |
| 5261 TECPR2   | SOX2 regulated genes in Keratinocyte Overexpression from PMID: 30772301 | SOX2 |
| 5262 TFAP2C   | SOX2 regulated genes in Keratinocyte Overexpression from PMID: 30772301 | SOX2 |
| 5263 PRDM15   | SOX2 regulated genes in Keratinocyte Overexpression from PMID: 30772301 | SOX2 |
| 5264 RUNX1    | SOX2 regulated genes in Keratinocyte Overexpression from PMID: 30772301 | SOX2 |
| 5265 ERCC6L   | SOX2 regulated genes in Keratinocyte Overexpression from PMID: 30772301 | SOX2 |
| 5266 CHODL    | SOX2 regulated genes in Keratinocyte Overexpression from PMID: 30772301 | SOX2 |
| 5267 FGD1     | SOX2 regulated genes in Keratinocyte Overexpression from PMID: 30772301 | SOX2 |
| 5268 RBM3     | SOX2 regulated genes in Keratinocyte Overexpression from PMID: 30772301 | SOX2 |
| 5269 GPR137C  | SOX2 regulated genes in Keratinocyte Overexpression from PMID: 30772301 | SOX2 |
| 5270 SYTL5    | SOX2 regulated genes in Keratinocyte Overexpression from PMID: 30772301 | SOX2 |
| 5271 HSPH1    | SOX2 regulated genes in Keratinocyte Overexpression from PMID: 30772301 | SOX2 |
| 5272 CDKL5    | SOX2 regulated genes in Keratinocyte Overexpression from PMID: 30772301 | SOX2 |
| 5273 GLRX5    | SOX2 regulated genes in Keratinocyte Overexpression from PMID: 30772301 | SOX2 |
| 5274 SAMD10   | SOX2 regulated genes in Keratinocyte Overexpression from PMID: 30772301 | SOX2 |
| 5275 KIF4A    | SOX2 regulated genes in Keratinocyte Overexpression from PMID: 30772301 | SOX2 |
| 5276 LRR1     | SOX2 regulated genes in Keratinocyte Overexpression from PMID: 30772301 | SOX2 |
| 5277 POLE2    | SOX2 regulated genes in Keratinocyte Overexpression from PMID: 30772301 | SOX2 |
| 5278 EPG5     | SOX2 regulated genes in Keratinocyte Overexpression from PMID: 30772301 | SOX2 |
| 5279 DCUN1D4  | SOX2 regulated genes in Keratinocyte Overexpression from PMID: 30772301 | SOX2 |
| 5280 SEC61A2  | SOX2 regulated genes in Keratinocyte Overexpression from PMID: 30772301 | SOX2 |
| 5281 PKNOX1   | SOX2 regulated genes in Keratinocyte Overexpression from PMID: 30772301 | SOX2 |
| 5282 FRMD4A   | SOX2 regulated genes in Keratinocyte Overexpression from PMID: 30772301 | SOX2 |
| 5283 CDH22    | SOX2 regulated genes in Keratinocyte Overexpression from PMID: 30772301 | SOX2 |
| 5284 RBM11    | SOX2 regulated genes in Keratinocyte Overexpression from PMID: 30772301 | SOX2 |
| 5285 SEH1L    | SOX2 regulated genes in Keratinocyte Overexpression from PMID: 30772301 | SOX2 |
| 5286 FAM110A  | SOX2 regulated genes in Keratinocyte Overexpression from PMID: 30772301 | SOX2 |
| 5287 C21orf58 | SOX2 regulated genes in Keratinocyte Overexpression from PMID: 30772301 | SOX2 |
| 5288 HS3ST1   | SOX2 regulated genes in Keratinocyte Overexpression from PMID: 30772301 | SOX2 |
| 5289 PFDN4    | SOX2 regulated genes in Keratinocyte Overexpression from PMID: 30772301 | SOX2 |
| 5290 SEPHS1   | SOX2 regulated genes in Keratinocyte Overexpression from PMID: 30772301 | SOX2 |
| 5291 TMX4     | SOX2 regulated genes in Keratinocyte Overexpression from PMID: 30772301 | SOX2 |
| 5292 SPATA13  | SOX2 regulated genes in Keratinocyte Overexpression from PMID: 30772301 | SOX2 |
| 5293 RCL1     | SOX2 regulated genes in Keratinocyte Overexpression from PMID: 30772301 | SOX2 |
| 5294 BMP4     | SOX2 regulated genes in Keratinocyte Overexpression from PMID: 30772301 | SOX2 |
| 5295 DEPDC5   | SOX2 regulated genes in Keratinocyte Overexpression from PMID: 30772301 | SOX2 |
| 5296 PCNX1    | SOX2 regulated genes in Keratinocyte Overexpression from PMID: 30772301 | SOX2 |
| 5297 ETS2     | SOX2 regulated genes in Keratinocyte Overexpression from PMID: 30772301 | SOX2 |
| 5298 TPGS2    | SOX2 regulated genes in Keratinocyte Overexpression from PMID: 30772301 | SOX2 |
| 5299 CDK5RAP1 | SOX2 regulated genes in Keratinocyte Overexpression from PMID: 30772301 | SOX2 |
| 5300 LTN1     | SOX2 regulated genes in Keratinocyte Overexpression from PMID: 30772301 | SOX2 |
| 5301 CFAP61   | SOX2 regulated genes in Keratinocyte Overexpression from PMID: 30772301 | SOX2 |
| 5302 DONSON   | SOX2 regulated genes in Keratinocyte Overexpression from PMID: 30772301 | SOX2 |
| 5303 DIAPH3   | SOX2 regulated genes in Keratinocyte Overexpression from PMID: 30772301 | SOX2 |
| 5304 KCTD1    | SOX2 regulated genes in Keratinocyte Overexpression from PMID: 30772301 | SOX2 |
| 5305 LSM14B   | SOX2 regulated genes in Keratinocyte Overexpression from PMID: 30772301 | SOX2 |

|                   |                                                                         |      |
|-------------------|-------------------------------------------------------------------------|------|
| 5306 LHFPL6       | SOX2 regulated genes in Keratinocyte Overexpression from PMID: 30772301 | SOX2 |
| 5307 PSMG2        | SOX2 regulated genes in Keratinocyte Overexpression from PMID: 30772301 | SOX2 |
| 5308 ADRM1        | SOX2 regulated genes in Keratinocyte Overexpression from PMID: 30772301 | SOX2 |
| 5309 MIFEP        | SOX2 regulated genes in Keratinocyte Overexpression from PMID: 30772301 | SOX2 |
| 5310 GTSE1        | SOX2 regulated genes in Keratinocyte Overexpression from PMID: 30772301 | SOX2 |
| 5311 SLC37A1      | SOX2 regulated genes in Keratinocyte Overexpression from PMID: 30772301 | SOX2 |
| 5312 TGIF1        | SOX2 regulated genes in Keratinocyte Overexpression from PMID: 30772301 | SOX2 |
| 5313 RNF17        | SOX2 regulated genes in Keratinocyte Overexpression from PMID: 30772301 | SOX2 |
| 5314 CENPC        | SOX2 regulated genes in Keratinocyte Overexpression from PMID: 30772301 | SOX2 |
| 5315 PSMC6        | SOX2 regulated genes in Keratinocyte Overexpression from PMID: 30772301 | SOX2 |
| 5316 AHCY         | SOX2 regulated genes in Keratinocyte Overexpression from PMID: 30772301 | SOX2 |
| 5317 MYO5B        | SOX2 regulated genes in Keratinocyte Overexpression from PMID: 30772301 | SOX2 |
| 5318 NPC1         | SOX2 regulated genes in Keratinocyte Overexpression from PMID: 30772301 | SOX2 |
| 5319 GRPEL1       | SOX2 regulated genes in Keratinocyte Overexpression from PMID: 30772301 | SOX2 |
| 5320 PDXP         | SOX2 regulated genes in Keratinocyte Overexpression from PMID: 30772301 | SOX2 |
| 5321 RNGTT        | SOX2 regulated genes in Keratinocyte Overexpression from PMID: 30772301 | SOX2 |
| 5322 ESF1         | SOX2 regulated genes in Keratinocyte Overexpression from PMID: 30772301 | SOX2 |
| 5323 QRFPR        | SOX2 regulated genes in Keratinocyte Overexpression from PMID: 30772301 | SOX2 |
| 5324 THTPA        | SOX2 regulated genes in Keratinocyte Overexpression from PMID: 30772301 | SOX2 |
| 5325 NKX1-2       | SOX2 regulated genes in Keratinocyte Overexpression from PMID: 30772301 | SOX2 |
| 5326 C14orf93     | SOX2 regulated genes in Keratinocyte Overexpression from PMID: 30772301 | SOX2 |
| 5327 MYO1D        | SOX2 regulated genes in Keratinocyte Overexpression from PMID: 30772301 | SOX2 |
| 5328 LASP1        | SOX2 regulated genes in Keratinocyte Overexpression from PMID: 30772301 | SOX2 |
| 5329 DLGAP4       | SOX2 regulated genes in Keratinocyte Overexpression from PMID: 30772301 | SOX2 |
| 5330 BCOR         | SOX2 regulated genes in Keratinocyte Overexpression from PMID: 30772301 | SOX2 |
| 5331 CYP17A1      | SOX2 regulated genes in Keratinocyte Overexpression from PMID: 30772301 | SOX2 |
| 5332 FAM234B      | SOX2 regulated genes in Keratinocyte Overexpression from PMID: 30772301 | SOX2 |
| 5333 GPAT3        | SOX2 regulated genes in Keratinocyte Overexpression from PMID: 30772301 | SOX2 |
| 5334 TNKS2        | SOX2 regulated genes in Keratinocyte Overexpression from PMID: 30772301 | SOX2 |
| 5335 EFCAB11      | SOX2 regulated genes in Keratinocyte Overexpression from PMID: 30772301 | SOX2 |
| 5336 GPATCH8      | SOX2 regulated genes in Keratinocyte Overexpression from PMID: 30772301 | SOX2 |
| 5337 SUPT16H      | SOX2 regulated genes in Keratinocyte Overexpression from PMID: 30772301 | SOX2 |
| 5338 ZNF407       | SOX2 regulated genes in Keratinocyte Overexpression from PMID: 30772301 | SOX2 |
| 5339 ATP5MF-PTCD1 | SOX2 regulated genes in Keratinocyte Overexpression from PMID: 30772301 | SOX2 |
| 5340 TEX30        | SOX2 regulated genes in Keratinocyte Overexpression from PMID: 30772301 | SOX2 |
| 5341 GRIA3        | SOX2 regulated genes in Keratinocyte Overexpression from PMID: 30772301 | SOX2 |
| 5342 COPS4        | SOX2 regulated genes in Keratinocyte Overexpression from PMID: 30772301 | SOX2 |
| 5343 TSSK4        | SOX2 regulated genes in Keratinocyte Overexpression from PMID: 30772301 | SOX2 |
| 5344 INCENP       | SOX2 regulated genes in Keratinocyte Overexpression from PMID: 30772301 | SOX2 |
| 5345 LZTS1        | SOX2 regulated genes in Keratinocyte Overexpression from PMID: 30772301 | SOX2 |
| 5346 SETBP1       | SOX2 regulated genes in Keratinocyte Overexpression from PMID: 30772301 | SOX2 |
| 5347 RPL36A       | SOX2 regulated genes in Keratinocyte Overexpression from PMID: 30772301 | SOX2 |
| 5348 PLPP2        | SOX2 regulated genes in Keratinocyte Overexpression from PMID: 30772301 | SOX2 |
| 5349 NF2          | SOX2 regulated genes in Keratinocyte Overexpression from PMID: 30772301 | SOX2 |
| 5350 C18orf32     | SOX2 regulated genes in Keratinocyte Overexpression from PMID: 30772301 | SOX2 |
| 5351 ABTB2        | SOX2 regulated genes in Keratinocyte Overexpression from PMID: 30772301 | SOX2 |
| 5352 SERPINB13    | SOX2 regulated genes in Keratinocyte Overexpression from PMID: 30772301 | SOX2 |
| 5353 MAP3K7       | SOX2 regulated genes in Keratinocyte Overexpression from PMID: 30772301 | SOX2 |
| 5354 FRAT1        | SOX2 regulated genes in Keratinocyte Overexpression from PMID: 30772301 | SOX2 |
| 5355 RNF167       | SOX2 regulated genes in Keratinocyte Overexpression from PMID: 30772301 | SOX2 |
| 5356 TSPAN7       | SOX2 regulated genes in Keratinocyte Overexpression from PMID: 30772301 | SOX2 |
| 5357 GUCD1        | SOX2 regulated genes in Keratinocyte Overexpression from PMID: 30772301 | SOX2 |
| 5358 GSTCD        | SOX2 regulated genes in Keratinocyte Overexpression from PMID: 30772301 | SOX2 |
| 5359 ZBTB43       | SOX2 regulated genes in Keratinocyte Overexpression from PMID: 30772301 | SOX2 |
| 5360 PPP2R2A      | SOX2 regulated genes in Keratinocyte Overexpression from PMID: 30772301 | SOX2 |
| 5361 NUDCD3       | SOX2 regulated genes in Keratinocyte Overexpression from PMID: 30772301 | SOX2 |
| 5362 SERPINB11    | SOX2 regulated genes in Keratinocyte Overexpression from PMID: 30772301 | SOX2 |
| 5363 SRXN1        | SOX2 regulated genes in Keratinocyte Overexpression from PMID: 30772301 | SOX2 |
| 5364 LDLRAD3      | SOX2 regulated genes in Keratinocyte Overexpression from PMID: 30772301 | SOX2 |
| 5365 NRBF2        | SOX2 regulated genes in Keratinocyte Overexpression from PMID: 30772301 | SOX2 |
| 5366 MIEF1        | SOX2 regulated genes in Keratinocyte Overexpression from PMID: 30772301 | SOX2 |

|      |          |                                                                         |      |
|------|----------|-------------------------------------------------------------------------|------|
| 5367 | LIG3     | SOX2 regulated genes in Keratinocyte Overexpression from PMID: 30772301 | SOX2 |
| 5368 | DLST     | SOX2 regulated genes in Keratinocyte Overexpression from PMID: 30772301 | SOX2 |
| 5369 | ASPHD2   | SOX2 regulated genes in Keratinocyte Overexpression from PMID: 30772301 | SOX2 |
| 5370 | SPATC1L  | SOX2 regulated genes in Keratinocyte Overexpression from PMID: 30772301 | SOX2 |
| 5371 | KIF1C    | SOX2 regulated genes in Keratinocyte Overexpression from PMID: 30772301 | SOX2 |
| 5372 | PPIL2    | SOX2 regulated genes in Keratinocyte Overexpression from PMID: 30772301 | SOX2 |
| 5373 | PPP1R26  | SOX2 regulated genes in Keratinocyte Overexpression from PMID: 30772301 | SOX2 |
| 5374 | MED4     | SOX2 regulated genes in Keratinocyte Overexpression from PMID: 30772301 | SOX2 |
| 5375 | ZFYVE19  | SOX2 regulated genes in Keratinocyte Overexpression from PMID: 30772301 | SOX2 |
| 5376 | FRMD6    | SOX2 regulated genes in Keratinocyte Overexpression from PMID: 30772301 | SOX2 |
| 5377 | PDZD8    | SOX2 regulated genes in Keratinocyte Overexpression from PMID: 30772301 | SOX2 |
| 5378 | BACH2    | SOX2 regulated genes in Keratinocyte Overexpression from PMID: 30772301 | SOX2 |
| 5379 | AQP11    | SOX2 regulated genes in Keratinocyte Overexpression from PMID: 30772301 | SOX2 |
| 5380 | AP1S1    | SOX2 regulated genes in Keratinocyte Overexpression from PMID: 30772301 | SOX2 |
| 5381 | ANO3     | SOX2 regulated genes in Keratinocyte Overexpression from PMID: 30772301 | SOX2 |
| 5382 | CENPP    | SOX2 regulated genes in Keratinocyte Overexpression from PMID: 30772301 | SOX2 |
| 5383 | POLR2M   | SOX2 regulated genes in Keratinocyte Overexpression from PMID: 30772301 | SOX2 |
| 5384 | CEP44    | SOX2 regulated genes in Keratinocyte Overexpression from PMID: 30772301 | SOX2 |
| 5385 | ZNRF2    | SOX2 regulated genes in Keratinocyte Overexpression from PMID: 30772301 | SOX2 |
| 5386 | C9orf40  | SOX2 regulated genes in Keratinocyte Overexpression from PMID: 30772301 | SOX2 |
| 5387 | UBR7     | SOX2 regulated genes in Keratinocyte Overexpression from PMID: 30772301 | SOX2 |
| 5388 | TPD52L1  | SOX2 regulated genes in Keratinocyte Overexpression from PMID: 30772301 | SOX2 |
| 5389 | RSL1D1   | SOX2 regulated genes in Keratinocyte Overexpression from PMID: 30772301 | SOX2 |
| 5390 | LSM5     | SOX2 regulated genes in Keratinocyte Overexpression from PMID: 30772301 | SOX2 |
| 5391 | IRAK1BP1 | SOX2 regulated genes in Keratinocyte Overexpression from PMID: 30772301 | SOX2 |
| 5392 | ABT1     | SOX2 regulated genes in Keratinocyte Overexpression from PMID: 30772301 | SOX2 |
| 5393 | TSTD2    | SOX2 regulated genes in Keratinocyte Overexpression from PMID: 30772301 | SOX2 |
| 5394 | CLDN10   | SOX2 regulated genes in Keratinocyte Overexpression from PMID: 30772301 | SOX2 |
| 5395 | TOR2A    | SOX2 regulated genes in Keratinocyte Overexpression from PMID: 30772301 | SOX2 |
| 5396 | MAPK1    | SOX2 regulated genes in Keratinocyte Overexpression from PMID: 30772301 | SOX2 |
| 5397 | VPS16    | SOX2 regulated genes in Keratinocyte Overexpression from PMID: 30772301 | SOX2 |
| 5398 | HAUS2    | SOX2 regulated genes in Keratinocyte Overexpression from PMID: 30772301 | SOX2 |
| 5399 | BUB3     | SOX2 regulated genes in Keratinocyte Overexpression from PMID: 30772301 | SOX2 |
| 5400 | PAK6     | SOX2 regulated genes in Keratinocyte Overexpression from PMID: 30772301 | SOX2 |
| 5401 | RCE1     | SOX2 regulated genes in Keratinocyte Overexpression from PMID: 30772301 | SOX2 |
| 5402 | YBX3     | SOX2 regulated genes in Keratinocyte Overexpression from PMID: 30772301 | SOX2 |
| 5403 | MORC2    | SOX2 regulated genes in Keratinocyte Overexpression from PMID: 30772301 | SOX2 |
| 5404 | PALM     | SOX2 regulated genes in Keratinocyte Overexpression from PMID: 30772301 | SOX2 |
| 5405 | RHOD     | SOX2 regulated genes in Keratinocyte Overexpression from PMID: 30772301 | SOX2 |
| 5406 | METTL14  | SOX2 regulated genes in Keratinocyte Overexpression from PMID: 30772301 | SOX2 |
| 5407 | NECAP1   | SOX2 regulated genes in Keratinocyte Overexpression from PMID: 30772301 | SOX2 |
| 5408 | AAR2     | SOX2 regulated genes in Keratinocyte Overexpression from PMID: 30772301 | SOX2 |
| 5409 | RBM26    | SOX2 regulated genes in Keratinocyte Overexpression from PMID: 30772301 | SOX2 |
| 5410 | UCHL3    | SOX2 regulated genes in Keratinocyte Overexpression from PMID: 30772301 | SOX2 |
| 5411 | BCL2L14  | SOX2 regulated genes in Keratinocyte Overexpression from PMID: 30772301 | SOX2 |
| 5412 | NONO     | SOX2 regulated genes in Keratinocyte Overexpression from PMID: 30772301 | SOX2 |
| 5413 | USP14    | SOX2 regulated genes in Keratinocyte Overexpression from PMID: 30772301 | SOX2 |
| 5414 | EDC3     | SOX2 regulated genes in Keratinocyte Overexpression from PMID: 30772301 | SOX2 |
| 5415 | ETV4     | SOX2 regulated genes in Keratinocyte Overexpression from PMID: 30772301 | SOX2 |
| 5416 | NKX3-1   | SOX2 regulated genes in Keratinocyte Overexpression from PMID: 30772301 | SOX2 |
| 5417 | BCL2L1   | SOX2 regulated genes in Keratinocyte Overexpression from PMID: 30772301 | SOX2 |
| 5418 | MAGOHB   | SOX2 regulated genes in Keratinocyte Overexpression from PMID: 30772301 | SOX2 |
| 5419 | UBE2K    | SOX2 regulated genes in Keratinocyte Overexpression from PMID: 30772301 | SOX2 |
| 5420 | HARBI1   | SOX2 regulated genes in Keratinocyte Overexpression from PMID: 30772301 | SOX2 |
| 5421 | CAPN15   | SOX2 regulated genes in Keratinocyte Overexpression from PMID: 30772301 | SOX2 |
| 5422 | RPL23    | SOX2 regulated genes in Keratinocyte Overexpression from PMID: 30772301 | SOX2 |
| 5423 | LRP6     | SOX2 regulated genes in Keratinocyte Overexpression from PMID: 30772301 | SOX2 |
| 5424 | DSC1     | SOX2 regulated genes in Keratinocyte Overexpression from PMID: 30772301 | SOX2 |
| 5425 | PAPSS1   | SOX2 regulated genes in Keratinocyte Overexpression from PMID: 30772301 | SOX2 |
| 5426 | RBBP7    | SOX2 regulated genes in Keratinocyte Overexpression from PMID: 30772301 | SOX2 |
| 5427 | C7orf26  | SOX2 regulated genes in Keratinocyte Overexpression from PMID: 30772301 | SOX2 |

|                |                                                                         |      |
|----------------|-------------------------------------------------------------------------|------|
| 5428 ID1       | SOX2 regulated genes in Keratinocyte Overexpression from PMID: 30772301 | SOX2 |
| 5429 DSG2      | SOX2 regulated genes in Keratinocyte Overexpression from PMID: 30772301 | SOX2 |
| 5430 MCM3      | SOX2 regulated genes in Keratinocyte Overexpression from PMID: 30772301 | SOX2 |
| 5431 SREBF2    | SOX2 regulated genes in Keratinocyte Overexpression from PMID: 30772301 | SOX2 |
| 5432 DNTTIP1   | SOX2 regulated genes in Keratinocyte Overexpression from PMID: 30772301 | SOX2 |
| 5433 ZGPAT     | SOX2 regulated genes in Keratinocyte Overexpression from PMID: 30772301 | SOX2 |
| 5434 RBM39     | SOX2 regulated genes in Keratinocyte Overexpression from PMID: 30772301 | SOX2 |
| 5435 NCOA5     | SOX2 regulated genes in Keratinocyte Overexpression from PMID: 30772301 | SOX2 |
| 5436 POLR2F    | SOX2 regulated genes in Keratinocyte Overexpression from PMID: 30772301 | SOX2 |
| 5437 ITFG2     | SOX2 regulated genes in Keratinocyte Overexpression from PMID: 30772301 | SOX2 |
| 5438 DUSP4     | SOX2 regulated genes in Keratinocyte Overexpression from PMID: 30772301 | SOX2 |
| 5439 MCM8      | SOX2 regulated genes in Keratinocyte Overexpression from PMID: 30772301 | SOX2 |
| 5440 RAB11FIP1 | SOX2 regulated genes in Keratinocyte Overexpression from PMID: 30772301 | SOX2 |
| 5441 NEDD9     | SOX2 regulated genes in Keratinocyte Overexpression from PMID: 30772301 | SOX2 |
| 5442 MIOS      | SOX2 regulated genes in Keratinocyte Overexpression from PMID: 30772301 | SOX2 |
| 5443 RUNX2     | SOX2 regulated genes in Keratinocyte Overexpression from PMID: 30772301 | SOX2 |
| 5444 C10orf88  | SOX2 regulated genes in Keratinocyte Overexpression from PMID: 30772301 | SOX2 |
| 5445 TRIM27    | SOX2 regulated genes in Keratinocyte Overexpression from PMID: 30772301 | SOX2 |
| 5446 SOX21     | SOX2 regulated genes in Keratinocyte Overexpression from PMID: 30772301 | SOX2 |
| 5447 GRIN3B    | SOX2 regulated genes in Keratinocyte Overexpression from PMID: 30772301 | SOX2 |
| 5448 NIPSNAP1  | SOX2 regulated genes in Keratinocyte Overexpression from PMID: 30772301 | SOX2 |
| 5449 MRPL1     | SOX2 regulated genes in Keratinocyte Overexpression from PMID: 30772301 | SOX2 |
| 5450 KDM5A     | SOX2 regulated genes in Keratinocyte Overexpression from PMID: 30772301 | SOX2 |
| 5451 PSMB5     | SOX2 regulated genes in Keratinocyte Overexpression from PMID: 30772301 | SOX2 |
| 5452 RPA3      | SOX2 regulated genes in Keratinocyte Overexpression from PMID: 30772301 | SOX2 |
| 5453 ASB6      | SOX2 regulated genes in Keratinocyte Overexpression from PMID: 30772301 | SOX2 |
| 5454 CAAP1     | SOX2 regulated genes in Keratinocyte Overexpression from PMID: 30772301 | SOX2 |
| 5455 TXNDC17   | SOX2 regulated genes in Keratinocyte Overexpression from PMID: 30772301 | SOX2 |
| 5456 BRD3      | SOX2 regulated genes in Keratinocyte Overexpression from PMID: 30772301 | SOX2 |
| 5457 IPPK      | SOX2 regulated genes in Keratinocyte Overexpression from PMID: 30772301 | SOX2 |
| 5458 TYMS      | SOX2 regulated genes in Keratinocyte Overexpression from PMID: 30772301 | SOX2 |
| 5459 NAPG      | SOX2 regulated genes in Keratinocyte Overexpression from PMID: 30772301 | SOX2 |
| 5460 ESCO1     | SOX2 regulated genes in Keratinocyte Overexpression from PMID: 30772301 | SOX2 |
| 5461 THOC1     | SOX2 regulated genes in Keratinocyte Overexpression from PMID: 30772301 | SOX2 |
| 5462 FAM186B   | SOX2 regulated genes in Keratinocyte Overexpression from PMID: 30772301 | SOX2 |
| 5463 STYK1     | SOX2 regulated genes in Keratinocyte Overexpression from PMID: 30772301 | SOX2 |
| 5464 FAM98B    | SOX2 regulated genes in Keratinocyte Overexpression from PMID: 30772301 | SOX2 |
| 5465 SPECC1L   | SOX2 regulated genes in Keratinocyte Overexpression from PMID: 30772301 | SOX2 |
| 5466 DGCR2     | SOX2 regulated genes in Keratinocyte Overexpression from PMID: 30772301 | SOX2 |
| 5467 SRGAP1    | SOX2 regulated genes in Keratinocyte Overexpression from PMID: 30772301 | SOX2 |
| 5468 SLC38A2   | SOX2 regulated genes in Keratinocyte Overexpression from PMID: 30772301 | SOX2 |
| 5469 PTAR1     | SOX2 regulated genes in Keratinocyte Overexpression from PMID: 30772301 | SOX2 |
| 5470 MRPL41    | SOX2 regulated genes in Keratinocyte Overexpression from PMID: 30772301 | SOX2 |
| 5471 GRID2     | SOX2 regulated genes in Keratinocyte Overexpression from PMID: 30772301 | SOX2 |
| 5472 FLYWCH2   | SOX2 regulated genes in Keratinocyte Overexpression from PMID: 30772301 | SOX2 |
| 5473 CENPQ     | SOX2 regulated genes in Keratinocyte Overexpression from PMID: 30772301 | SOX2 |
| 5474 NUDT16L1  | SOX2 regulated genes in Keratinocyte Overexpression from PMID: 30772301 | SOX2 |
| 5475 NUPR2     | SOX2 regulated genes in Keratinocyte Overexpression from PMID: 30772301 | SOX2 |
| 5476 ING2      | SOX2 regulated genes in Keratinocyte Overexpression from PMID: 30772301 | SOX2 |
| 5477 TADA2B    | SOX2 regulated genes in Keratinocyte Overexpression from PMID: 30772301 | SOX2 |
| 5478 CPLX3     | SOX2 regulated genes in Keratinocyte Overexpression from PMID: 30772301 | SOX2 |
| 5479 EIF6      | SOX2 regulated genes in Keratinocyte Overexpression from PMID: 30772301 | SOX2 |
| 5480 CSE1L     | SOX2 regulated genes in Keratinocyte Overexpression from PMID: 30772301 | SOX2 |
| 5481 PRNP      | SOX2 regulated genes in Keratinocyte Overexpression from PMID: 30772301 | SOX2 |
| 5482 UROS      | SOX2 regulated genes in Keratinocyte Overexpression from PMID: 30772301 | SOX2 |
| 5483 CCDC120   | SOX2 regulated genes in Keratinocyte Overexpression from PMID: 30772301 | SOX2 |
| 5484 FKBP4     | SOX2 regulated genes in Keratinocyte Overexpression from PMID: 30772301 | SOX2 |
| 5485 ARHGAP23  | SOX2 regulated genes in Keratinocyte Overexpression from PMID: 30772301 | SOX2 |
| 5486 CXCL6     | SOX2 regulated genes in Keratinocyte Overexpression from PMID: 30772301 | SOX2 |
| 5487 TRABD     | SOX2 regulated genes in Keratinocyte Overexpression from PMID: 30772301 | SOX2 |
| 5488 RIOK1     | SOX2 regulated genes in Keratinocyte Overexpression from PMID: 30772301 | SOX2 |

|               |                                                                         |      |
|---------------|-------------------------------------------------------------------------|------|
| 5489 HCFC1    | SOX2 regulated genes in Keratinocyte Overexpression from PMID: 30772301 | SOX2 |
| 5490 SLC52A1  | SOX2 regulated genes in Keratinocyte Overexpression from PMID: 30772301 | SOX2 |
| 5491 CRTAC1   | SOX2 regulated genes in Keratinocyte Overexpression from PMID: 30772301 | SOX2 |
| 5492 APEX2    | SOX2 regulated genes in Keratinocyte Overexpression from PMID: 30772301 | SOX2 |
| 5493 RASEF    | SOX2 regulated genes in Keratinocyte Overexpression from PMID: 30772301 | SOX2 |
| 5494 EGR3     | SOX2 regulated genes in Keratinocyte Overexpression from PMID: 30772301 | SOX2 |
| 5495 TRIM29   | SOX2 regulated genes in Keratinocyte Overexpression from PMID: 30772301 | SOX2 |
| 5496 DKK1     | SOX2 regulated genes in Keratinocyte Overexpression from PMID: 30772301 | SOX2 |
| 5497 SAMD8    | SOX2 regulated genes in Keratinocyte Overexpression from PMID: 30772301 | SOX2 |
| 5498 NUP58    | SOX2 regulated genes in Keratinocyte Overexpression from PMID: 30772301 | SOX2 |
| 5499 SIVA1    | SOX2 regulated genes in Keratinocyte Overexpression from PMID: 30772301 | SOX2 |
| 5500 LRFN4    | SOX2 regulated genes in Keratinocyte Overexpression from PMID: 30772301 | SOX2 |
| 5501 UMODL1   | SOX2 regulated genes in Keratinocyte Overexpression from PMID: 30772301 | SOX2 |
| 5502 POLR2E   | SOX2 regulated genes in Keratinocyte Overexpression from PMID: 30772301 | SOX2 |
| 5503 ACOT8    | SOX2 regulated genes in Keratinocyte Overexpression from PMID: 30772301 | SOX2 |
| 5504 NEDD8    | SOX2 regulated genes in Keratinocyte Overexpression from PMID: 30772301 | SOX2 |
| 5505 REM2     | SOX2 regulated genes in Keratinocyte Overexpression from PMID: 30772301 | SOX2 |
| 5506 ZNF503   | SOX2 regulated genes in Keratinocyte Overexpression from PMID: 30772301 | SOX2 |
| 5507 PRICKLE3 | SOX2 regulated genes in Keratinocyte Overexpression from PMID: 30772301 | SOX2 |
| 5508 RHOT2    | SOX2 regulated genes in Keratinocyte Overexpression from PMID: 30772301 | SOX2 |
| 5509 C15orf65 | SOX2 regulated genes in Keratinocyte Overexpression from PMID: 30772301 | SOX2 |
| 5510 TFAM     | SOX2 regulated genes in Keratinocyte Overexpression from PMID: 30772301 | SOX2 |
| 5511 SLC26A8  | SOX2 regulated genes in Keratinocyte Overexpression from PMID: 30772301 | SOX2 |
| 5512 PACSIN1  | SOX2 regulated genes in Keratinocyte Overexpression from PMID: 30772301 | SOX2 |
| 5513 FANCF    | SOX2 regulated genes in Keratinocyte Overexpression from PMID: 30772301 | SOX2 |
| 5514 SH3RF1   | SOX2 regulated genes in Keratinocyte Overexpression from PMID: 30772301 | SOX2 |
| 5515 OSBP     | SOX2 regulated genes in Keratinocyte Overexpression from PMID: 30772301 | SOX2 |
| 5516 NUP88    | SOX2 regulated genes in Keratinocyte Overexpression from PMID: 30772301 | SOX2 |
| 5517 PCID2    | SOX2 regulated genes in Keratinocyte Overexpression from PMID: 30772301 | SOX2 |
| 5518 SLCO4A1  | SOX2 regulated genes in Keratinocyte Overexpression from PMID: 30772301 | SOX2 |
| 5519 LMX1B    | SOX2 regulated genes in Keratinocyte Overexpression from PMID: 30772301 | SOX2 |
| 5520 SMC2     | SOX2 regulated genes in Keratinocyte Overexpression from PMID: 30772301 | SOX2 |
| 5521 FRMD8    | SOX2 regulated genes in Keratinocyte Overexpression from PMID: 30772301 | SOX2 |
| 5522 CWH43    | SOX2 regulated genes in Keratinocyte Overexpression from PMID: 30772301 | SOX2 |
| 5523 FNDC11   | SOX2 regulated genes in Keratinocyte Overexpression from PMID: 30772301 | SOX2 |
| 5524 ABCB7    | SOX2 regulated genes in Keratinocyte Overexpression from PMID: 30772301 | SOX2 |
| 5525 LPIN2    | SOX2 regulated genes in Keratinocyte Overexpression from PMID: 30772301 | SOX2 |
| 5526 TMEM251  | SOX2 regulated genes in Keratinocyte Overexpression from PMID: 30772301 | SOX2 |
| 5527 MIF      | SOX2 regulated genes in Keratinocyte Overexpression from PMID: 30772301 | SOX2 |
| 5528 MRPS2    | SOX2 regulated genes in Keratinocyte Overexpression from PMID: 30772301 | SOX2 |
| 5529 TERT     | SOX2 regulated genes in Keratinocyte Overexpression from PMID: 30772301 | SOX2 |
| 5530 THNSL1   | SOX2 regulated genes in Keratinocyte Overexpression from PMID: 30772301 | SOX2 |
| 5531 AK7      | SOX2 regulated genes in Keratinocyte Overexpression from PMID: 30772301 | SOX2 |
| 5532 RBMX     | SOX2 regulated genes in Keratinocyte Overexpression from PMID: 30772301 | SOX2 |
| 5533 SLC30A9  | SOX2 regulated genes in Keratinocyte Overexpression from PMID: 30772301 | SOX2 |
| 5534 CHIC2    | SOX2 regulated genes in Keratinocyte Overexpression from PMID: 30772301 | SOX2 |
| 5535 SLC44A1  | SOX2 regulated genes in Keratinocyte Overexpression from PMID: 30772301 | SOX2 |
| 5536 NGDN     | SOX2 regulated genes in Keratinocyte Overexpression from PMID: 30772301 | SOX2 |
| 5537 NEU3     | SOX2 regulated genes in Keratinocyte Overexpression from PMID: 30772301 | SOX2 |
| 5538 DSG1     | SOX2 regulated genes in Keratinocyte Overexpression from PMID: 30772301 | SOX2 |
| 5539 TAF1D    | SOX2 regulated genes in Keratinocyte Overexpression from PMID: 30772301 | SOX2 |
| 5540 TMEM144  | SOX2 regulated genes in Keratinocyte Overexpression from PMID: 30772301 | SOX2 |
| 5541 NSFL1C   | SOX2 regulated genes in Keratinocyte Overexpression from PMID: 30772301 | SOX2 |
| 5542 TTC5     | SOX2 regulated genes in Keratinocyte Overexpression from PMID: 30772301 | SOX2 |
| 5543 MRPL36   | SOX2 regulated genes in Keratinocyte Overexpression from PMID: 30772301 | SOX2 |
| 5544 NCLN     | SOX2 regulated genes in Keratinocyte Overexpression from PMID: 30772301 | SOX2 |
| 5545 RBM20    | SOX2 regulated genes in Keratinocyte Overexpression from PMID: 30772301 | SOX2 |
| 5546 FOXC1    | SOX2 regulated genes in Keratinocyte Overexpression from PMID: 30772301 | SOX2 |
| 5547 URM1     | SOX2 regulated genes in Keratinocyte Overexpression from PMID: 30772301 | SOX2 |
| 5548 TMEM255A | SOX2 regulated genes in Keratinocyte Overexpression from PMID: 30772301 | SOX2 |
| 5549 PRPF19   | SOX2 regulated genes in Keratinocyte Overexpression from PMID: 30772301 | SOX2 |

|      |           |                                                                         |      |
|------|-----------|-------------------------------------------------------------------------|------|
| 5550 | CCDC116   | SOX2 regulated genes in Keratinocyte Overexpression from PMID: 30772301 | SOX2 |
| 5551 | RFXAP     | SOX2 regulated genes in Keratinocyte Overexpression from PMID: 30772301 | SOX2 |
| 5552 | TDP1      | SOX2 regulated genes in Keratinocyte Overexpression from PMID: 30772301 | SOX2 |
| 5553 | LEPROTL1  | SOX2 regulated genes in Keratinocyte Overexpression from PMID: 30772301 | SOX2 |
| 5554 | RAB11FIP2 | SOX2 regulated genes in Keratinocyte Overexpression from PMID: 30772301 | SOX2 |
| 5555 | PDCL      | SOX2 regulated genes in Keratinocyte Overexpression from PMID: 30772301 | SOX2 |
| 5556 | TDRD3     | SOX2 regulated genes in Keratinocyte Overexpression from PMID: 30772301 | SOX2 |
| 5557 | RND2      | SOX2 regulated genes in Keratinocyte Overexpression from PMID: 30772301 | SOX2 |
| 5558 | TRIM68    | SOX2 regulated genes in Keratinocyte Overexpression from PMID: 30772301 | SOX2 |
| 5559 | BMPER     | SOX2 regulated genes in Keratinocyte Overexpression from PMID: 30772301 | SOX2 |
| 5560 | WFIKKN1   | SOX2 regulated genes in Keratinocyte Overexpression from PMID: 30772301 | SOX2 |
| 5561 | MAPK11    | SOX2 regulated genes in Keratinocyte Overexpression from PMID: 30772301 | SOX2 |
| 5562 | ZNF219    | SOX2 regulated genes in Keratinocyte Overexpression from PMID: 30772301 | SOX2 |
| 5563 | ARHGAP24  | SOX2 regulated genes in Keratinocyte Overexpression from PMID: 30772301 | SOX2 |
| 5564 | MUC15     | SOX2 regulated genes in Keratinocyte Overexpression from PMID: 30772301 | SOX2 |
| 5565 | BCORL1    | SOX2 regulated genes in Keratinocyte Overexpression from PMID: 30772301 | SOX2 |
| 5566 | NMRK1     | SOX2 regulated genes in Keratinocyte Overexpression from PMID: 30772301 | SOX2 |
| 5567 | EVC2      | SOX2 regulated genes in Keratinocyte Overexpression from PMID: 30772301 | SOX2 |
| 5568 | ARPC1A    | SOX2 regulated genes in Keratinocyte Overexpression from PMID: 30772301 | SOX2 |
| 5569 | SHMT2     | SOX2 regulated genes in Keratinocyte Overexpression from PMID: 30772301 | SOX2 |
| 5570 | CDC5L     | SOX2 regulated genes in Keratinocyte Overexpression from PMID: 30772301 | SOX2 |
| 5571 | TLE6      | SOX2 regulated genes in Keratinocyte Overexpression from PMID: 30772301 | SOX2 |
| 5572 | TEX9      | SOX2 regulated genes in Keratinocyte Overexpression from PMID: 30772301 | SOX2 |
| 5573 | PRPSAP2   | SOX2 regulated genes in Keratinocyte Overexpression from PMID: 30772301 | SOX2 |
| 5574 | ARGLU1    | SOX2 regulated genes in Keratinocyte Overexpression from PMID: 30772301 | SOX2 |
| 5575 | FASTKD3   | SOX2 regulated genes in Keratinocyte Overexpression from PMID: 30772301 | SOX2 |
| 5576 | SLTM      | SOX2 regulated genes in Keratinocyte Overexpression from PMID: 30772301 | SOX2 |
| 5577 | PIM1      | SOX2 regulated genes in Keratinocyte Overexpression from PMID: 30772301 | SOX2 |
| 5578 | PLAA      | SOX2 regulated genes in Keratinocyte Overexpression from PMID: 30772301 | SOX2 |
| 5579 | UBQLN1    | SOX2 regulated genes in Keratinocyte Overexpression from PMID: 30772301 | SOX2 |
| 5580 | ORMDL3    | SOX2 regulated genes in Keratinocyte Overexpression from PMID: 30772301 | SOX2 |
| 5581 | TBRG4     | SOX2 regulated genes in Keratinocyte Overexpression from PMID: 30772301 | SOX2 |
| 5582 | PORCN     | SOX2 regulated genes in Keratinocyte Overexpression from PMID: 30772301 | SOX2 |
| 5583 | SNRPD1    | SOX2 regulated genes in Keratinocyte Overexpression from PMID: 30772301 | SOX2 |
| 5584 | PSMF1     | SOX2 regulated genes in Keratinocyte Overexpression from PMID: 30772301 | SOX2 |
| 5585 | MRPL50    | SOX2 regulated genes in Keratinocyte Overexpression from PMID: 30772301 | SOX2 |
| 5586 | SLC10A4   | SOX2 regulated genes in Keratinocyte Overexpression from PMID: 30772301 | SOX2 |
| 5587 | AIMP2     | SOX2 regulated genes in Keratinocyte Overexpression from PMID: 30772301 | SOX2 |
| 5588 | TRMT11    | SOX2 regulated genes in Keratinocyte Overexpression from PMID: 30772301 | SOX2 |
| 5589 | GATAD1    | SOX2 regulated genes in Keratinocyte Overexpression from PMID: 30772301 | SOX2 |
| 5590 | AARS2     | SOX2 regulated genes in Keratinocyte Overexpression from PMID: 30772301 | SOX2 |
| 5591 | RDM1      | SOX2 regulated genes in Keratinocyte Overexpression from PMID: 30772301 | SOX2 |
| 5592 | CBFA2T2   | SOX2 regulated genes in Keratinocyte Overexpression from PMID: 30772301 | SOX2 |
| 5593 | UBE2A     | SOX2 regulated genes in Keratinocyte Overexpression from PMID: 30772301 | SOX2 |
| 5594 | C9orf85   | SOX2 regulated genes in Keratinocyte Overexpression from PMID: 30772301 | SOX2 |
| 5595 | COL4A5    | SOX2 regulated genes in Keratinocyte Overexpression from PMID: 30772301 | SOX2 |
| 5596 | GSDMA     | SOX2 regulated genes in Keratinocyte Overexpression from PMID: 30772301 | SOX2 |
| 5597 | PRIM2     | SOX2 regulated genes in Keratinocyte Overexpression from PMID: 30772301 | SOX2 |
| 5598 | CBX6      | SOX2 regulated genes in Keratinocyte Overexpression from PMID: 30772301 | SOX2 |
| 5599 | RPGR      | SOX2 regulated genes in Keratinocyte Overexpression from PMID: 30772301 | SOX2 |
| 5600 | P2RX5     | SOX2 regulated genes in Keratinocyte Overexpression from PMID: 30772301 | SOX2 |
| 5601 | NUDT15    | SOX2 regulated genes in Keratinocyte Overexpression from PMID: 30772301 | SOX2 |
| 5602 | PLK4      | SOX2 regulated genes in Keratinocyte Overexpression from PMID: 30772301 | SOX2 |
| 5603 | AXIN1     | SOX2 regulated genes in Keratinocyte Overexpression from PMID: 30772301 | SOX2 |
| 5604 | ARHGAP1   | SOX2 regulated genes in Keratinocyte Overexpression from PMID: 30772301 | SOX2 |
| 5605 | RPS24     | SOX2 regulated genes in Keratinocyte Overexpression from PMID: 30772301 | SOX2 |
| 5606 | BLMH      | SOX2 regulated genes in Keratinocyte Overexpression from PMID: 30772301 | SOX2 |
| 5607 | TNC       | SOX2 regulated genes in Keratinocyte Overexpression from PMID: 30772301 | SOX2 |
| 5608 | TUG1      | SOX2 regulated genes in Keratinocyte Overexpression from PMID: 30772301 | SOX2 |
| 5609 | NATD1     | SOX2 regulated genes in Keratinocyte Overexpression from PMID: 30772301 | SOX2 |
| 5610 | RNF20     | SOX2 regulated genes in Keratinocyte Overexpression from PMID: 30772301 | SOX2 |

|      |         |                                                                         |      |
|------|---------|-------------------------------------------------------------------------|------|
| 5611 | HMG20A  | SOX2 regulated genes in Keratinocyte Overexpression from PMID: 30772301 | SOX2 |
| 5612 | AVP1    | SOX2 regulated genes in Keratinocyte Overexpression from PMID: 30772301 | SOX2 |
| 5613 | MRPL49  | SOX2 regulated genes in Keratinocyte Overexpression from PMID: 30772301 | SOX2 |
| 5614 | TSPAN9  | SOX2 regulated genes in Keratinocyte Overexpression from PMID: 30772301 | SOX2 |
| 5615 | MISP    | SOX2 regulated genes in Keratinocyte Overexpression from PMID: 30772301 | SOX2 |
| 5616 | UPF3A   | SOX2 regulated genes in Keratinocyte Overexpression from PMID: 30772301 | SOX2 |
| 5617 | TMTC1   | SOX2 regulated genes in Keratinocyte Overexpression from PMID: 30772301 | SOX2 |
| 5618 | ANLN    | SOX2 regulated genes in Keratinocyte Overexpression from PMID: 30772301 | SOX2 |
| 5619 | PINX1   | SOX2 regulated genes in Keratinocyte Overexpression from PMID: 30772301 | SOX2 |
| 5620 | EXPH5   | SOX2 regulated genes in Keratinocyte Overexpression from PMID: 30772301 | SOX2 |
| 5621 | POLR3H  | SOX2 regulated genes in Keratinocyte Overexpression from PMID: 30772301 | SOX2 |
| 5622 | ZSWIM1  | SOX2 regulated genes in Keratinocyte Overexpression from PMID: 30772301 | SOX2 |
| 5623 | SHPK    | SOX2 regulated genes in Keratinocyte Overexpression from PMID: 30772301 | SOX2 |
| 5624 | RRP12   | SOX2 regulated genes in Keratinocyte Overexpression from PMID: 30772301 | SOX2 |
| 5625 | SNRPD3  | SOX2 regulated genes in Keratinocyte Overexpression from PMID: 30772301 | SOX2 |
| 5626 | LIME1   | SOX2 regulated genes in Keratinocyte Overexpression from PMID: 30772301 | SOX2 |
| 5627 | WIPI2   | SOX2 regulated genes in Keratinocyte Overexpression from PMID: 30772301 | SOX2 |
| 5628 | EFS     | SOX2 regulated genes in Keratinocyte Overexpression from PMID: 30772301 | SOX2 |
| 5629 | DHRS1   | SOX2 regulated genes in Keratinocyte Overexpression from PMID: 30772301 | SOX2 |
| 5630 | EFHC1   | SOX2 regulated genes in Keratinocyte Overexpression from PMID: 30772301 | SOX2 |
| 5631 | TAB1    | SOX2 regulated genes in Keratinocyte Overexpression from PMID: 30772301 | SOX2 |
| 5632 | VAPA    | SOX2 regulated genes in Keratinocyte Overexpression from PMID: 30772301 | SOX2 |
| 5633 | HSBP1L1 | SOX2 regulated genes in Keratinocyte Overexpression from PMID: 30772301 | SOX2 |
| 5634 | TMC5    | SOX2 regulated genes in Keratinocyte Overexpression from PMID: 30772301 | SOX2 |
| 5635 | CD2AP   | SOX2 regulated genes in Keratinocyte Overexpression from PMID: 30772301 | SOX2 |
| 5636 | ROMO1   | SOX2 regulated genes in Keratinocyte Overexpression from PMID: 30772301 | SOX2 |
| 5637 | SLC15A1 | SOX2 regulated genes in Keratinocyte Overexpression from PMID: 30772301 | SOX2 |
| 5638 | XKR6    | SOX2 regulated genes in Keratinocyte Overexpression from PMID: 30772301 | SOX2 |
| 5639 | PAPPA   | SOX2 regulated genes in Keratinocyte Overexpression from PMID: 30772301 | SOX2 |
| 5640 | KIF27   | SOX2 regulated genes in Keratinocyte Overexpression from PMID: 30772301 | SOX2 |
| 5641 | YAP1    | SOX2 regulated genes in Keratinocyte Overexpression from PMID: 30772301 | SOX2 |
| 5642 | R3HDM4  | SOX2 regulated genes in Keratinocyte Overexpression from PMID: 30772301 | SOX2 |
| 5643 | ZFAND2A | SOX2 regulated genes in Keratinocyte Overexpression from PMID: 30772301 | SOX2 |
| 5644 | SERGEF  | SOX2 regulated genes in Keratinocyte Overexpression from PMID: 30772301 | SOX2 |
| 5645 | WDHD1   | SOX2 regulated genes in Keratinocyte Overexpression from PMID: 30772301 | SOX2 |
| 5646 | PALD1   | SOX2 regulated genes in Keratinocyte Overexpression from PMID: 30772301 | SOX2 |
| 5647 | RNF138  | SOX2 regulated genes in Keratinocyte Overexpression from PMID: 30772301 | SOX2 |
| 5648 | FRYL    | SOX2 regulated genes in Keratinocyte Overexpression from PMID: 30772301 | SOX2 |
| 5649 | IPO8    | SOX2 regulated genes in Keratinocyte Overexpression from PMID: 30772301 | SOX2 |
| 5650 | SENP6   | SOX2 regulated genes in Keratinocyte Overexpression from PMID: 30772301 | SOX2 |
| 5651 | UTP14A  | SOX2 regulated genes in Keratinocyte Overexpression from PMID: 30772301 | SOX2 |
| 5652 | PRPS1   | SOX2 regulated genes in Keratinocyte Overexpression from PMID: 30772301 | SOX2 |
| 5653 | RPH3AL  | SOX2 regulated genes in Keratinocyte Overexpression from PMID: 30772301 | SOX2 |
| 5654 | CCAR1   | SOX2 regulated genes in Keratinocyte Overexpression from PMID: 30772301 | SOX2 |
| 5655 | INTS13  | SOX2 regulated genes in Keratinocyte Overexpression from PMID: 30772301 | SOX2 |
| 5656 | MTERF1  | SOX2 regulated genes in Keratinocyte Overexpression from PMID: 30772301 | SOX2 |
| 5657 | HDDC2   | SOX2 regulated genes in Keratinocyte Overexpression from PMID: 30772301 | SOX2 |
| 5658 | TCP11   | SOX2 regulated genes in Keratinocyte Overexpression from PMID: 30772301 | SOX2 |
| 5659 | ADNP    | SOX2 regulated genes in Keratinocyte Overexpression from PMID: 30772301 | SOX2 |
| 5660 | SLC39A2 | SOX2 regulated genes in Keratinocyte Overexpression from PMID: 30772301 | SOX2 |
| 5661 | IPO4    | SOX2 regulated genes in Keratinocyte Overexpression from PMID: 30772301 | SOX2 |
| 5662 | FAM204A | SOX2 regulated genes in Keratinocyte Overexpression from PMID: 30772301 | SOX2 |
| 5663 | SDAD1   | SOX2 regulated genes in Keratinocyte Overexpression from PMID: 30772301 | SOX2 |
| 5664 | STK24   | SOX2 regulated genes in Keratinocyte Overexpression from PMID: 30772301 | SOX2 |
| 5665 | SLC34A2 | SOX2 regulated genes in Keratinocyte Overexpression from PMID: 30772301 | SOX2 |
| 5666 | RAP2C   | SOX2 regulated genes in Keratinocyte Overexpression from PMID: 30772301 | SOX2 |
| 5667 | C7orf50 | SOX2 regulated genes in Keratinocyte Overexpression from PMID: 30772301 | SOX2 |
| 5668 | BARX1   | SOX2 regulated genes in Keratinocyte Overexpression from PMID: 30772301 | SOX2 |
| 5669 | ZDHC16  | SOX2 regulated genes in Keratinocyte Overexpression from PMID: 30772301 | SOX2 |
| 5670 | PHF2    | SOX2 regulated genes in Keratinocyte Overexpression from PMID: 30772301 | SOX2 |
| 5671 | ARFGAP2 | SOX2 regulated genes in Keratinocyte Overexpression from PMID: 30772301 | SOX2 |

|               |                                                                         |      |
|---------------|-------------------------------------------------------------------------|------|
| 5672 RPS27L   | SOX2 regulated genes in Keratinocyte Overexpression from PMID: 30772301 | SOX2 |
| 5673 PSMB7    | SOX2 regulated genes in Keratinocyte Overexpression from PMID: 30772301 | SOX2 |
| 5674 FAU      | SOX2 regulated genes in Keratinocyte Overexpression from PMID: 30772301 | SOX2 |
| 5675 PRDM8    | SOX2 regulated genes in Keratinocyte Overexpression from PMID: 30772301 | SOX2 |
| 5676 ANKRD50  | SOX2 regulated genes in Keratinocyte Overexpression from PMID: 30772301 | SOX2 |
| 5677 ID4      | SOX2 regulated genes in Keratinocyte Overexpression from PMID: 30772301 | SOX2 |
| 5678 SERPINB5 | SOX2 regulated genes in Keratinocyte Overexpression from PMID: 30772301 | SOX2 |
| 5679 PARM1    | SOX2 regulated genes in Keratinocyte Overexpression from PMID: 30772301 | SOX2 |
| 5680 RIBC1    | SOX2 regulated genes in Keratinocyte Overexpression from PMID: 30772301 | SOX2 |
| 5681 MRPS31   | SOX2 regulated genes in Keratinocyte Overexpression from PMID: 30772301 | SOX2 |
| 5682 IGF2BP3  | SOX2 regulated genes in Keratinocyte Overexpression from PMID: 30772301 | SOX2 |
| 5683 U2AF1L5  | SOX2 regulated genes in Keratinocyte Overexpression from PMID: 30772301 | SOX2 |
| 5684 TFAP2B   | SOX2 regulated genes in Keratinocyte Overexpression from PMID: 30772301 | SOX2 |
| 5685 E4F1     | SOX2 regulated genes in Keratinocyte Overexpression from PMID: 30772301 | SOX2 |
| 5686 OPHN1    | SOX2 regulated genes in Keratinocyte Overexpression from PMID: 30772301 | SOX2 |
| 5687 SOX12    | SOX2 regulated genes in Keratinocyte Overexpression from PMID: 30772301 | SOX2 |
| 5688 CEP78    | SOX2 regulated genes in Keratinocyte Overexpression from PMID: 30772301 | SOX2 |
| 5689 HOMEZ    | SOX2 regulated genes in Keratinocyte Overexpression from PMID: 30772301 | SOX2 |
| 5690 TRIL     | SOX2 regulated genes in Keratinocyte Overexpression from PMID: 30772301 | SOX2 |
| 5691 PEBP4    | SOX2 regulated genes in Keratinocyte Overexpression from PMID: 30772301 | SOX2 |
| 5692 ARIH1    | SOX2 regulated genes in Keratinocyte Overexpression from PMID: 30772301 | SOX2 |
| 5693 NKAP     | SOX2 regulated genes in Keratinocyte Overexpression from PMID: 30772301 | SOX2 |
| 5694 ASCC3    | SOX2 regulated genes in Keratinocyte Overexpression from PMID: 30772301 | SOX2 |
| 5695 GPKOW    | SOX2 regulated genes in Keratinocyte Overexpression from PMID: 30772301 | SOX2 |
| 5696 BORCS5   | SOX2 regulated genes in Keratinocyte Overexpression from PMID: 30772301 | SOX2 |
| 5697 SEC14L2  | SOX2 regulated genes in Keratinocyte Overexpression from PMID: 30772301 | SOX2 |
| 5698 CCDC169  | SOX2 regulated genes in Keratinocyte Overexpression from PMID: 30772301 | SOX2 |
| 5699 RWD4     | SOX2 regulated genes in Keratinocyte Overexpression from PMID: 30772301 | SOX2 |
| 5700 AFG3L2   | SOX2 regulated genes in Keratinocyte Overexpression from PMID: 30772301 | SOX2 |
| 5701 UXT      | SOX2 regulated genes in Keratinocyte Overexpression from PMID: 30772301 | SOX2 |
| 5702 ZNHIT2   | SOX2 regulated genes in Keratinocyte Overexpression from PMID: 30772301 | SOX2 |
| 5703 HSPA4L   | SOX2 regulated genes in Keratinocyte Overexpression from PMID: 30772301 | SOX2 |
| 5704 GON7     | SOX2 regulated genes in Keratinocyte Overexpression from PMID: 30772301 | SOX2 |
| 5705 PCNA     | SOX2 regulated genes in Keratinocyte Overexpression from PMID: 30772301 | SOX2 |
| 5706 ENDOU    | SOX2 regulated genes in Keratinocyte Overexpression from PMID: 30772301 | SOX2 |
| 5707 AGR2     | SOX2 regulated genes in Keratinocyte Overexpression from PMID: 30772301 | SOX2 |
| 5708 EIF2AK4  | SOX2 regulated genes in Keratinocyte Overexpression from PMID: 30772301 | SOX2 |
| 5709 RTCB     | SOX2 regulated genes in Keratinocyte Overexpression from PMID: 30772301 | SOX2 |
| 5710 RPP40    | SOX2 regulated genes in Keratinocyte Overexpression from PMID: 30772301 | SOX2 |
| 5711 KIAA1217 | SOX2 regulated genes in Keratinocyte Overexpression from PMID: 30772301 | SOX2 |
| 5712 CDCA7L   | SOX2 regulated genes in Keratinocyte Overexpression from PMID: 30772301 | SOX2 |
| 5713 SCD      | SOX2 regulated genes in Keratinocyte Overexpression from PMID: 30772301 | SOX2 |
| 5714 CDC42EP2 | SOX2 regulated genes in Keratinocyte Overexpression from PMID: 30772301 | SOX2 |
| 5715 FOXO1    | SOX2 regulated genes in Keratinocyte Overexpression from PMID: 30772301 | SOX2 |
| 5716 ONECUT3  | SOX2 regulated genes in Keratinocyte Overexpression from PMID: 30772301 | SOX2 |
| 5717 TCFL5    | SOX2 regulated genes in Keratinocyte Overexpression from PMID: 30772301 | SOX2 |
| 5718 RPL35    | SOX2 regulated genes in Keratinocyte Overexpression from PMID: 30772301 | SOX2 |
| 5719 HACE1    | SOX2 regulated genes in Keratinocyte Overexpression from PMID: 30772301 | SOX2 |
| 5720 QSOX2    | SOX2 regulated genes in Keratinocyte Overexpression from PMID: 30772301 | SOX2 |
| 5721 HNRNPD   | SOX2 regulated genes in Keratinocyte Overexpression from PMID: 30772301 | SOX2 |
| 5722 PLXNA3   | SOX2 regulated genes in Keratinocyte Overexpression from PMID: 30772301 | SOX2 |
| 5723 UQCR10   | SOX2 regulated genes in Keratinocyte Overexpression from PMID: 30772301 | SOX2 |
| 5724 AASDHPPT | SOX2 regulated genes in Keratinocyte Overexpression from PMID: 30772301 | SOX2 |
| 5725 TXNL4A   | SOX2 regulated genes in Keratinocyte Overexpression from PMID: 30772301 | SOX2 |
| 5726 CEP295   | SOX2 regulated genes in Keratinocyte Overexpression from PMID: 30772301 | SOX2 |
| 5727 ZNF280C  | SOX2 regulated genes in Keratinocyte Overexpression from PMID: 30772301 | SOX2 |
| 5728 TAX1BP3  | SOX2 regulated genes in Keratinocyte Overexpression from PMID: 30772301 | SOX2 |
| 5729 ELP4     | SOX2 regulated genes in Keratinocyte Overexpression from PMID: 30772301 | SOX2 |
| 5730 RPU5D2   | SOX2 regulated genes in Keratinocyte Overexpression from PMID: 30772301 | SOX2 |
| 5731 EIF3A    | SOX2 regulated genes in Keratinocyte Overexpression from PMID: 30772301 | SOX2 |
| 5732 TSPAN14  | SOX2 regulated genes in Keratinocyte Overexpression from PMID: 30772301 | SOX2 |



|                |                                                                         |      |
|----------------|-------------------------------------------------------------------------|------|
| 5733 HMGXB4    | SOX2 regulated genes in Keratinocyte Overexpression from PMID: 30772301 | SOX2 |
| 5734 YTHDF1    | SOX2 regulated genes in Keratinocyte Overexpression from PMID: 30772301 | SOX2 |
| 5735 SPEF1     | SOX2 regulated genes in Keratinocyte Overexpression from PMID: 30772301 | SOX2 |
| 5736 JARID2    | SOX2 regulated genes in Keratinocyte Overexpression from PMID: 30772301 | SOX2 |
| 5737 TXN       | SOX2 regulated genes in Keratinocyte Overexpression from PMID: 30772301 | SOX2 |
| 5738 OAT       | SOX2 regulated genes in Keratinocyte Overexpression from PMID: 30772301 | SOX2 |
| 5739 PRMT9     | SOX2 regulated genes in Keratinocyte Overexpression from PMID: 30772301 | SOX2 |
| 5740 ATP12A    | SOX2 regulated genes in Keratinocyte Overexpression from PMID: 30772301 | SOX2 |
| 5741 OSER1     | SOX2 regulated genes in Keratinocyte Overexpression from PMID: 30772301 | SOX2 |
| 5742 ZNF335    | SOX2 regulated genes in Keratinocyte Overexpression from PMID: 30772301 | SOX2 |
| 5743 ZSWIM3    | SOX2 regulated genes in Keratinocyte Overexpression from PMID: 30772301 | SOX2 |
| 5744 SFXN2     | SOX2 regulated genes in Keratinocyte Overexpression from PMID: 30772301 | SOX2 |
| 5745 ZFAND5    | SOX2 regulated genes in Keratinocyte Overexpression from PMID: 30772301 | SOX2 |
| 5746 ETNPPL    | SOX2 regulated genes in Keratinocyte Overexpression from PMID: 30772301 | SOX2 |
| 5747 RGP1      | SOX2 regulated genes in Keratinocyte Overexpression from PMID: 30772301 | SOX2 |
| 5748 TRUB2     | SOX2 regulated genes in Keratinocyte Overexpression from PMID: 30772301 | SOX2 |
| 5749 RCAN1     | SOX2 regulated genes in Keratinocyte Overexpression from PMID: 30772301 | SOX2 |
| 5750 C11orf58  | SOX2 regulated genes in Keratinocyte Overexpression from PMID: 30772301 | SOX2 |
| 5751 MAK16     | SOX2 regulated genes in Keratinocyte Overexpression from PMID: 30772301 | SOX2 |
| 5752 TNFRSF13C | SOX2 regulated genes in Keratinocyte Overexpression from PMID: 30772301 | SOX2 |
| 5753 ZNF330    | SOX2 regulated genes in Keratinocyte Overexpression from PMID: 30772301 | SOX2 |
| 5754 FPGS      | SOX2 regulated genes in Keratinocyte Overexpression from PMID: 30772301 | SOX2 |
| 5755 DHX33     | SOX2 regulated genes in Keratinocyte Overexpression from PMID: 30772301 | SOX2 |
| 5756 SAC3D1    | SOX2 regulated genes in Keratinocyte Overexpression from PMID: 30772301 | SOX2 |
| 5757 RAB40C    | SOX2 regulated genes in Keratinocyte Overexpression from PMID: 30772301 | SOX2 |
| 5758 RFLNB     | SOX2 regulated genes in Keratinocyte Overexpression from PMID: 30772301 | SOX2 |
| 5759 MACROD2   | SOX2 regulated genes in Keratinocyte Overexpression from PMID: 30772301 | SOX2 |
| 5760 VNN1      | SOX2 regulated genes in Keratinocyte Overexpression from PMID: 30772301 | SOX2 |
| 5761 HIPK3     | SOX2 regulated genes in Keratinocyte Overexpression from PMID: 30772301 | SOX2 |
| 5762 ARHGEF39  | SOX2 regulated genes in Keratinocyte Overexpression from PMID: 30772301 | SOX2 |
| 5763 PGAP3     | SOX2 regulated genes in Keratinocyte Overexpression from PMID: 30772301 | SOX2 |
| 5764 CCKBR     | SOX2 regulated genes in Keratinocyte Overexpression from PMID: 30772301 | SOX2 |
| 5765 BMS1      | SOX2 regulated genes in Keratinocyte Overexpression from PMID: 30772301 | SOX2 |
| 5766 MED31     | SOX2 regulated genes in Keratinocyte Overexpression from PMID: 30772301 | SOX2 |
| 5767 DCDC2     | SOX2 regulated genes in Keratinocyte Overexpression from PMID: 30772301 | SOX2 |
| 5768 XRCC6     | SOX2 regulated genes in Keratinocyte Overexpression from PMID: 30772301 | SOX2 |
| 5769 EGFL6     | SOX2 regulated genes in Keratinocyte Overexpression from PMID: 30772301 | SOX2 |
| 5770 KCTD9     | SOX2 regulated genes in Keratinocyte Overexpression from PMID: 30772301 | SOX2 |
| 5771 SNX12     | SOX2 regulated genes in Keratinocyte Overexpression from PMID: 30772301 | SOX2 |
| 5772 NT5C3B    | SOX2 regulated genes in Keratinocyte Overexpression from PMID: 30772301 | SOX2 |
| 5773 BCCIP     | SOX2 regulated genes in Keratinocyte Overexpression from PMID: 30772301 | SOX2 |
| 5774 STUB1     | SOX2 regulated genes in Keratinocyte Overexpression from PMID: 30772301 | SOX2 |
| 5775 INIP      | SOX2 regulated genes in Keratinocyte Overexpression from PMID: 30772301 | SOX2 |
| 5776 DDX3X     | SOX2 regulated genes in Keratinocyte Overexpression from PMID: 30772301 | SOX2 |
| 5777 ANKRD10   | SOX2 regulated genes in Keratinocyte Overexpression from PMID: 30772301 | SOX2 |
| 5778 EHMT1     | SOX2 regulated genes in Keratinocyte Overexpression from PMID: 30772301 | SOX2 |
| 5779 DICER1    | SOX2 regulated genes in Keratinocyte Overexpression from PMID: 30772301 | SOX2 |
| 5780 MBOAT1    | SOX2 regulated genes in Keratinocyte Overexpression from PMID: 30772301 | SOX2 |
| 5781 NR6A1     | SOX2 regulated genes in Keratinocyte Overexpression from PMID: 30772301 | SOX2 |
| 5782 MDN1      | SOX2 regulated genes in Keratinocyte Overexpression from PMID: 30772301 | SOX2 |
| 5783 CREB5     | SOX2 regulated genes in Keratinocyte Overexpression from PMID: 30772301 | SOX2 |
| 5784 S1PR3     | SOX2 regulated genes in Keratinocyte Overexpression from PMID: 30772301 | SOX2 |
| 5785 ASCC1     | SOX2 regulated genes in Keratinocyte Overexpression from PMID: 30772301 | SOX2 |
| 5786 SOGA3     | SOX2 regulated genes in Keratinocyte Overexpression from PMID: 30772301 | SOX2 |
| 5787 ARHGAP42  | SOX2 regulated genes in Keratinocyte Overexpression from PMID: 30772301 | SOX2 |
| 5788 KIF6      | SOX2 regulated genes in Keratinocyte Overexpression from PMID: 30772301 | SOX2 |
| 5789 GNB1L     | SOX2 regulated genes in Keratinocyte Overexpression from PMID: 30772301 | SOX2 |
| 5790 ALDH8A1   | SOX2 regulated genes in Keratinocyte Overexpression from PMID: 30772301 | SOX2 |
| 5791 CDKAL1    | SOX2 regulated genes in Keratinocyte Overexpression from PMID: 30772301 | SOX2 |
| 5792 SLC35F2   | SOX2 regulated genes in Keratinocyte Overexpression from PMID: 30772301 | SOX2 |
| 5793 MID2      | SOX2 regulated genes in Keratinocyte Overexpression from PMID: 30772301 | SOX2 |

|                |                                                                         |      |
|----------------|-------------------------------------------------------------------------|------|
| 5794 EBF4      | SOX2 regulated genes in Keratinocyte Overexpression from PMID: 30772301 | SOX2 |
| 5795 UFD1      | SOX2 regulated genes in Keratinocyte Overexpression from PMID: 30772301 | SOX2 |
| 5796 NUDT3     | SOX2 regulated genes in Keratinocyte Overexpression from PMID: 30772301 | SOX2 |
| 5797 TRMT2A    | SOX2 regulated genes in Keratinocyte Overexpression from PMID: 30772301 | SOX2 |
| 5798 ZC3H14    | SOX2 regulated genes in Keratinocyte Overexpression from PMID: 30772301 | SOX2 |
| 5799 ARFGEF2   | SOX2 regulated genes in Keratinocyte Overexpression from PMID: 30772301 | SOX2 |
| 5800 COX4I2    | SOX2 regulated genes in Keratinocyte Overexpression from PMID: 30772301 | SOX2 |
| 5801 SALL3     | SOX2 regulated genes in Keratinocyte Overexpression from PMID: 30772301 | SOX2 |
| 5802 EFNB2     | SOX2 regulated genes in Keratinocyte Overexpression from PMID: 30772301 | SOX2 |
| 5803 PMS2      | SOX2 regulated genes in Keratinocyte Overexpression from PMID: 30772301 | SOX2 |
| 5804 SCLT1     | SOX2 regulated genes in Keratinocyte Overexpression from PMID: 30772301 | SOX2 |
| 5805 TTF1      | SOX2 regulated genes in Keratinocyte Overexpression from PMID: 30772301 | SOX2 |
| 5806 ITPRIP    | SOX2 regulated genes in Keratinocyte Overexpression from PMID: 30772301 | SOX2 |
| 5807 DSN1      | SOX2 regulated genes in Keratinocyte Overexpression from PMID: 30772301 | SOX2 |
| 5808 CPNE8     | SOX2 regulated genes in Keratinocyte Overexpression from PMID: 30772301 | SOX2 |
| 5809 RPAP3     | SOX2 regulated genes in Keratinocyte Overexpression from PMID: 30772301 | SOX2 |
| 5810 CISD2     | SOX2 regulated genes in Keratinocyte Overexpression from PMID: 30772301 | SOX2 |
| 5811 INTS1     | SOX2 regulated genes in Keratinocyte Overexpression from PMID: 30772301 | SOX2 |
| 5812 METTL4    | SOX2 regulated genes in Keratinocyte Overexpression from PMID: 30772301 | SOX2 |
| 5813 TMPRSS11F | SOX2 regulated genes in Keratinocyte Overexpression from PMID: 30772301 | SOX2 |
| 5814 BNIP3L    | SOX2 regulated genes in Keratinocyte Overexpression from PMID: 30772301 | SOX2 |
| 5815 ADGRF1    | SOX2 regulated genes in Keratinocyte Overexpression from PMID: 30772301 | SOX2 |
| 5816 SPRYD3    | SOX2 regulated genes in Keratinocyte Overexpression from PMID: 30772301 | SOX2 |
| 5817 MRPL16    | SOX2 regulated genes in Keratinocyte Overexpression from PMID: 30772301 | SOX2 |
| 5818 FANCC     | SOX2 regulated genes in Keratinocyte Overexpression from PMID: 30772301 | SOX2 |
| 5819 PLP2      | SOX2 regulated genes in Keratinocyte Overexpression from PMID: 30772301 | SOX2 |
| 5820 WDR24     | SOX2 regulated genes in Keratinocyte Overexpression from PMID: 30772301 | SOX2 |
| 5821 TCF7L2    | SOX2 regulated genes in Keratinocyte Overexpression from PMID: 30772301 | SOX2 |
| 5822 LRP10     | SOX2 regulated genes in Keratinocyte Overexpression from PMID: 30772301 | SOX2 |
| 5823 CRELD2    | SOX2 regulated genes in Keratinocyte Overexpression from PMID: 30772301 | SOX2 |
| 5824 ABRACL    | SOX2 regulated genes in Keratinocyte Overexpression from PMID: 30772301 | SOX2 |
| 5825 NOL8      | SOX2 regulated genes in Keratinocyte Overexpression from PMID: 30772301 | SOX2 |
| 5826 MTMR3     | SOX2 regulated genes in Keratinocyte Overexpression from PMID: 30772301 | SOX2 |
| 5827 HHIP      | SOX2 regulated genes in Keratinocyte Overexpression from PMID: 30772301 | SOX2 |
| 5828 HAP1      | SOX2 regulated genes in Keratinocyte Overexpression from PMID: 30772301 | SOX2 |
| 5829 CHKA      | SOX2 regulated genes in Keratinocyte Overexpression from PMID: 30772301 | SOX2 |
| 5830 CYP46A1   | SOX2 regulated genes in Keratinocyte Overexpression from PMID: 30772301 | SOX2 |
| 5831 MBD2      | SOX2 regulated genes in Keratinocyte Overexpression from PMID: 30772301 | SOX2 |
| 5832 TMEM98    | SOX2 regulated genes in Keratinocyte Overexpression from PMID: 30772301 | SOX2 |
| 5833 FERMT1    | SOX2 regulated genes in Keratinocyte Overexpression from PMID: 30772301 | SOX2 |
| 5834 SMCHD1    | SOX2 regulated genes in Keratinocyte Overexpression from PMID: 30772301 | SOX2 |
| 5835 PLXNB2    | SOX2 regulated genes in Keratinocyte Overexpression from PMID: 30772301 | SOX2 |
| 5836 MAD2L1    | SOX2 regulated genes in Keratinocyte Overexpression from PMID: 30772301 | SOX2 |
| 5837 VTA1      | SOX2 regulated genes in Keratinocyte Overexpression from PMID: 30772301 | SOX2 |
| 5838 CARNMT1   | SOX2 regulated genes in Keratinocyte Overexpression from PMID: 30772301 | SOX2 |
| 5839 CELSR1    | SOX2 regulated genes in Keratinocyte Overexpression from PMID: 30772301 | SOX2 |
| 5840 C5orf49   | SOX2 regulated genes in Keratinocyte Overexpression from PMID: 30772301 | SOX2 |
| 5841 CDKL2     | SOX2 regulated genes in Keratinocyte Overexpression from PMID: 30772301 | SOX2 |
| 5842 CNOT7     | SOX2 regulated genes in Keratinocyte Overexpression from PMID: 30772301 | SOX2 |
| 5843 DSC3      | SOX2 regulated genes in Keratinocyte Overexpression from PMID: 30772301 | SOX2 |
| 5844 BUD31     | SOX2 regulated genes in Keratinocyte Overexpression from PMID: 30772301 | SOX2 |
| 5845 HDAC2     | SOX2 regulated genes in Keratinocyte Overexpression from PMID: 30772301 | SOX2 |
| 5846 C20orf27  | SOX2 regulated genes in Keratinocyte Overexpression from PMID: 30772301 | SOX2 |
| 5847 PITPNM3   | SOX2 regulated genes in Keratinocyte Overexpression from PMID: 30772301 | SOX2 |
| 5848 SUZ12     | SOX2 regulated genes in Keratinocyte Overexpression from PMID: 30772301 | SOX2 |
| 5849 TUBA8     | SOX2 regulated genes in Keratinocyte Overexpression from PMID: 30772301 | SOX2 |
| 5850 ZCCHC3    | SOX2 regulated genes in Keratinocyte Overexpression from PMID: 30772301 | SOX2 |
| 5851 DMRT1     | SOX2 regulated genes in Keratinocyte Overexpression from PMID: 30772301 | SOX2 |
| 5852 RPS19BP1  | SOX2 regulated genes in Keratinocyte Overexpression from PMID: 30772301 | SOX2 |
| 5853 OSBPL2    | SOX2 regulated genes in Keratinocyte Overexpression from PMID: 30772301 | SOX2 |
| 5854 FABP7     | SOX2 regulated genes in Keratinocyte Overexpression from PMID: 30772301 | SOX2 |

|      |           |                                                                         |      |
|------|-----------|-------------------------------------------------------------------------|------|
| 5855 | PGP       | SOX2 regulated genes in Keratinocyte Overexpression from PMID: 30772301 | SOX2 |
| 5856 | KRT6B     | SOX2 regulated genes in Keratinocyte Overexpression from PMID: 30772301 | SOX2 |
| 5857 | KRT6C     | SOX2 regulated genes in Keratinocyte Overexpression from PMID: 30772301 | SOX2 |
| 5858 | CPXM2     | SOX2 regulated genes in Keratinocyte Overexpression from PMID: 30772301 | SOX2 |
| 5859 | SCML4     | SOX2 regulated genes in Keratinocyte Overexpression from PMID: 30772301 | SOX2 |
| 5860 | PARD6G    | SOX2 regulated genes in Keratinocyte Overexpression from PMID: 30772301 | SOX2 |
| 5861 | ZNF341    | SOX2 regulated genes in Keratinocyte Overexpression from PMID: 30772301 | SOX2 |
| 5862 | AFAP1L2   | SOX2 regulated genes in Keratinocyte Overexpression from PMID: 30772301 | SOX2 |
| 5863 | PIGW      | SOX2 regulated genes in Keratinocyte Overexpression from PMID: 30772301 | SOX2 |
| 5864 | ASNS      | SOX2 regulated genes in Keratinocyte Overexpression from PMID: 30772301 | SOX2 |
| 5865 | DNAAF5    | SOX2 regulated genes in Keratinocyte Overexpression from PMID: 30772301 | SOX2 |
| 5866 | GRB7      | SOX2 regulated genes in Keratinocyte Overexpression from PMID: 30772301 | SOX2 |
| 5867 | FKBP1A    | SOX2 regulated genes in Keratinocyte Overexpression from PMID: 30772301 | SOX2 |
| 5868 | FKBP1C    | SOX2 regulated genes in Keratinocyte Overexpression from PMID: 30772301 | SOX2 |
| 5869 | PRRG4     | SOX2 regulated genes in Keratinocyte Overexpression from PMID: 30772301 | SOX2 |
| 5870 | GBA2      | SOX2 regulated genes in Keratinocyte Overexpression from PMID: 30772301 | SOX2 |
| 5871 | CUL4B     | SOX2 regulated genes in Keratinocyte Overexpression from PMID: 30772301 | SOX2 |
| 5872 | TFIP11    | SOX2 regulated genes in Keratinocyte Overexpression from PMID: 30772301 | SOX2 |
| 5873 | PLEKHS1   | SOX2 regulated genes in Keratinocyte Overexpression from PMID: 30772301 | SOX2 |
| 5874 | GOPC      | SOX2 regulated genes in Keratinocyte Overexpression from PMID: 30772301 | SOX2 |
| 5875 | KDM2A     | SOX2 regulated genes in Keratinocyte Overexpression from PMID: 30772301 | SOX2 |
| 5876 | SPIN1     | SOX2 regulated genes in Keratinocyte Overexpression from PMID: 30772301 | SOX2 |
| 5877 | PON2      | SOX2 regulated genes in Keratinocyte Overexpression from PMID: 30772301 | SOX2 |
| 5878 | MRPS17    | SOX2 regulated genes in Keratinocyte Overexpression from PMID: 30772301 | SOX2 |
| 5879 | KIAA0753  | SOX2 regulated genes in Keratinocyte Overexpression from PMID: 30772301 | SOX2 |
| 5880 | TSSC4     | SOX2 regulated genes in Keratinocyte Overexpression from PMID: 30772301 | SOX2 |
| 5881 | USP22     | SOX2 regulated genes in Keratinocyte Overexpression from PMID: 30772301 | SOX2 |
| 5882 | UBL4A     | SOX2 regulated genes in Keratinocyte Overexpression from PMID: 30772301 | SOX2 |
| 5883 | CSPG4     | SOX2 regulated genes in Keratinocyte Overexpression from PMID: 30772301 | SOX2 |
| 5884 | FANCI     | SOX2 regulated genes in Keratinocyte Overexpression from PMID: 30772301 | SOX2 |
| 5885 | PERP      | SOX2 regulated genes in Keratinocyte Overexpression from PMID: 30772301 | SOX2 |
| 5886 | TP53RK    | SOX2 regulated genes in Keratinocyte Overexpression from PMID: 30772301 | SOX2 |
| 5887 | COX8A     | SOX2 regulated genes in Keratinocyte Overexpression from PMID: 30772301 | SOX2 |
| 5888 | TIMMDC1   | SOX2 regulated genes in Keratinocyte Overexpression from PMID: 30772301 | SOX2 |
| 5889 | BMP2K     | SOX2 regulated genes in Keratinocyte Overexpression from PMID: 30772301 | SOX2 |
| 5890 | ACTR5     | SOX2 regulated genes in Keratinocyte Overexpression from PMID: 30772301 | SOX2 |
| 5891 | WDR59     | SOX2 regulated genes in Keratinocyte Overexpression from PMID: 30772301 | SOX2 |
| 5892 | POLR2K    | SOX2 regulated genes in Keratinocyte Overexpression from PMID: 30772301 | SOX2 |
| 5893 | WRAP53    | SOX2 regulated genes in Keratinocyte Overexpression from PMID: 30772301 | SOX2 |
| 5894 | APOM      | SOX2 regulated genes in Keratinocyte Overexpression from PMID: 30772301 | SOX2 |
| 5895 | NELFB     | SOX2 regulated genes in Keratinocyte Overexpression from PMID: 30772301 | SOX2 |
| 5896 | KIF18A    | SOX2 regulated genes in Keratinocyte Overexpression from PMID: 30772301 | SOX2 |
| 5897 | ZNF274    | SOX2 regulated genes in Keratinocyte Overexpression from PMID: 30772301 | SOX2 |
| 5898 | PNN       | SOX2 regulated genes in Keratinocyte Overexpression from PMID: 30772301 | SOX2 |
| 5899 | GABRQ     | SOX2 regulated genes in Keratinocyte Overexpression from PMID: 30772301 | SOX2 |
| 5900 | UBE2E1    | SOX2 regulated genes in Keratinocyte Overexpression from PMID: 30772301 | SOX2 |
| 5901 | MIA-RAB4B | SOX2 regulated genes in Keratinocyte Overexpression from PMID: 30772301 | SOX2 |
| 5902 | MIA       | SOX2 regulated genes in Keratinocyte Overexpression from PMID: 30772301 | SOX2 |
| 5903 | RNF214    | SOX2 regulated genes in Keratinocyte Overexpression from PMID: 30772301 | SOX2 |
| 5904 | SERPIND1  | SOX2 regulated genes in Keratinocyte Overexpression from PMID: 30772301 | SOX2 |
| 5905 | ZNF426    | SOX2 regulated genes in Keratinocyte Overexpression from PMID: 30772301 | SOX2 |
| 5906 | DXO       | SOX2 regulated genes in Keratinocyte Overexpression from PMID: 30772301 | SOX2 |
| 5907 | CD82      | SOX2 regulated genes in Keratinocyte Overexpression from PMID: 30772301 | SOX2 |
| 5908 | ITPKC     | SOX2 regulated genes in Keratinocyte Overexpression from PMID: 30772301 | SOX2 |
| 5909 | NXPE4     | SOX2 regulated genes in Keratinocyte Overexpression from PMID: 30772301 | SOX2 |
| 5910 | TRAPPC11  | SOX2 regulated genes in Keratinocyte Overexpression from PMID: 30772301 | SOX2 |
| 5911 | CST6      | SOX2 regulated genes in Keratinocyte Overexpression from PMID: 30772301 | SOX2 |
| 5912 | SYMPK     | SOX2 regulated genes in Keratinocyte Overexpression from PMID: 30772301 | SOX2 |
| 5913 | RWDD1     | SOX2 regulated genes in Keratinocyte Overexpression from PMID: 30772301 | SOX2 |
| 5914 | CHCHD6    | SOX2 regulated genes in Keratinocyte Overexpression from PMID: 30772301 | SOX2 |
| 5915 | YRDC      | SOX2 regulated genes in Keratinocyte Overexpression from PMID: 30772301 | SOX2 |

|               |                                                                         |      |
|---------------|-------------------------------------------------------------------------|------|
| 5916 FBXO30   | SOX2 regulated genes in Keratinocyte Overexpression from PMID: 30772301 | SOX2 |
| 5917 POLR3B   | SOX2 regulated genes in Keratinocyte Overexpression from PMID: 30772301 | SOX2 |
| 5918 CLPX     | SOX2 regulated genes in Keratinocyte Overexpression from PMID: 30772301 | SOX2 |
| 5919 TPRA1    | SOX2 regulated genes in Keratinocyte Overexpression from PMID: 30772301 | SOX2 |
| 5920 GALNT14  | SOX2 regulated genes in Keratinocyte Overexpression from PMID: 30772301 | SOX2 |
| 5921 MYO5C    | SOX2 regulated genes in Keratinocyte Overexpression from PMID: 30772301 | SOX2 |
| 5922 ZNRF1    | SOX2 regulated genes in Keratinocyte Overexpression from PMID: 30772301 | SOX2 |
| 5923 NUP214   | SOX2 regulated genes in Keratinocyte Overexpression from PMID: 30772301 | SOX2 |
| 5924 WNK2     | SOX2 regulated genes in Keratinocyte Overexpression from PMID: 30772301 | SOX2 |
| 5925 CBWD3    | SOX2 regulated genes in Keratinocyte Overexpression from PMID: 30772301 | SOX2 |
| 5926 CBWD5    | SOX2 regulated genes in Keratinocyte Overexpression from PMID: 30772301 | SOX2 |
| 5927 CBWD6    | SOX2 regulated genes in Keratinocyte Overexpression from PMID: 30772301 | SOX2 |
| 5928 USP1     | SOX2 regulated genes in Keratinocyte Overexpression from PMID: 30772301 | SOX2 |
| 5929 SLC27A5  | SOX2 regulated genes in Keratinocyte Overexpression from PMID: 30772301 | SOX2 |
| 5930 RNF6     | SOX2 regulated genes in Keratinocyte Overexpression from PMID: 30772301 | SOX2 |
| 5931 TMEM254  | SOX2 regulated genes in Keratinocyte Overexpression from PMID: 30772301 | SOX2 |
| 5932 RPP30    | SOX2 regulated genes in Keratinocyte Overexpression from PMID: 30772301 | SOX2 |
| 5933 RNASEH2C | SOX2 regulated genes in Keratinocyte Overexpression from PMID: 30772301 | SOX2 |
| 5934 COMMD2   | SOX2 regulated genes in Keratinocyte Overexpression from PMID: 30772301 | SOX2 |
| 5935 AEN      | SOX2 regulated genes in Keratinocyte Overexpression from PMID: 30772301 | SOX2 |
| 5936 NRG2     | SOX2 regulated genes in Keratinocyte Overexpression from PMID: 30772301 | SOX2 |
| 5937 CENPU    | SOX2 regulated genes in Keratinocyte Overexpression from PMID: 30772301 | SOX2 |
| 5938 KCNMB4   | SOX2 regulated genes in Keratinocyte Overexpression from PMID: 30772301 | SOX2 |
| 5939 MAP3K9   | SOX2 regulated genes in Keratinocyte Overexpression from PMID: 30772301 | SOX2 |
| 5940 EPC1     | SOX2 regulated genes in Keratinocyte Overexpression from PMID: 30772301 | SOX2 |
| 5941 GRTP1    | SOX2 regulated genes in Keratinocyte Overexpression from PMID: 30772301 | SOX2 |
| 5942 NETO2    | SOX2 regulated genes in Keratinocyte Overexpression from PMID: 30772301 | SOX2 |
| 5943 SEMA4D   | SOX2 regulated genes in Keratinocyte Overexpression from PMID: 30772301 | SOX2 |
| 5944 TMC1     | SOX2 regulated genes in Keratinocyte Overexpression from PMID: 30772301 | SOX2 |
| 5945 SARNP    | SOX2 regulated genes in Keratinocyte Overexpression from PMID: 30772301 | SOX2 |
| 5946 RHPN1    | SOX2 regulated genes in Keratinocyte Overexpression from PMID: 30772301 | SOX2 |
| 5947 ALG11    | SOX2 regulated genes in Keratinocyte Overexpression from PMID: 30772301 | SOX2 |
| 5948 CTHRC1   | SOX2 regulated genes in Keratinocyte Overexpression from PMID: 30772301 | SOX2 |
| 5949 EPB41L4B | SOX2 regulated genes in Keratinocyte Overexpression from PMID: 30772301 | SOX2 |
| 5950 MAMDC4   | SOX2 regulated genes in Keratinocyte Overexpression from PMID: 30772301 | SOX2 |
| 5951 TLK1     | SOX2 regulated genes in Keratinocyte Overexpression from PMID: 30772301 | SOX2 |
| 5952 IER3     | SOX2 regulated genes in Keratinocyte Overexpression from PMID: 30772301 | SOX2 |
| 5953 ENHO     | SOX2 regulated genes in Keratinocyte Overexpression from PMID: 30772301 | SOX2 |
| 5954 TAB3     | SOX2 regulated genes in Keratinocyte Overexpression from PMID: 30772301 | SOX2 |
| 5955 MED22    | SOX2 regulated genes in Keratinocyte Overexpression from PMID: 30772301 | SOX2 |
| 5956 DBR1     | SOX2 regulated genes in Keratinocyte Overexpression from PMID: 30772301 | SOX2 |
| 5957 MPV17L   | SOX2 regulated genes in Keratinocyte Overexpression from PMID: 30772301 | SOX2 |
| 5958 IFT74    | SOX2 regulated genes in Keratinocyte Overexpression from PMID: 30772301 | SOX2 |
| 5959 CYP1B1   | SOX2 regulated genes in Keratinocyte Overexpression from PMID: 30772301 | SOX2 |
| 5960 TG       | SOX2 regulated genes in Keratinocyte Overexpression from PMID: 30772301 | SOX2 |
| 5961 CDSN     | SOX2 regulated genes in Keratinocyte Overexpression from PMID: 30772301 | SOX2 |
| 5962 PAIP2B   | SOX2 regulated genes in Keratinocyte Overexpression from PMID: 30772301 | SOX2 |
| 5963 DTYMK    | SOX2 regulated genes in Keratinocyte Overexpression from PMID: 30772301 | SOX2 |
| 5964 SPATA5L1 | SOX2 regulated genes in Keratinocyte Overexpression from PMID: 30772301 | SOX2 |
| 5965 COPG2    | SOX2 regulated genes in Keratinocyte Overexpression from PMID: 30772301 | SOX2 |
| 5966 ZBTB40   | SOX2 regulated genes in Keratinocyte Overexpression from PMID: 30772301 | SOX2 |
| 5967 CTU2     | SOX2 regulated genes in Keratinocyte Overexpression from PMID: 30772301 | SOX2 |
| 5968 NEIL1    | SOX2 regulated genes in Keratinocyte Overexpression from PMID: 30772301 | SOX2 |
| 5969 MYCBP    | SOX2 regulated genes in Keratinocyte Overexpression from PMID: 30772301 | SOX2 |
| 5970 BDKRB2   | SOX2 regulated genes in Keratinocyte Overexpression from PMID: 30772301 | SOX2 |
| 5971 BHLHB9   | SOX2 regulated genes in Keratinocyte Overexpression from PMID: 30772301 | SOX2 |
| 5972 CHCHD2   | SOX2 regulated genes in Keratinocyte Overexpression from PMID: 30772301 | SOX2 |
| 5973 POLR2L   | SOX2 regulated genes in Keratinocyte Overexpression from PMID: 30772301 | SOX2 |
| 5974 SNRNP200 | SOX2 regulated genes in Keratinocyte Overexpression from PMID: 30772301 | SOX2 |
| 5975 CALCOCO1 | SOX2 regulated genes in Keratinocyte Overexpression from PMID: 30772301 | SOX2 |
| 5976 NUP107   | SOX2 regulated genes in Keratinocyte Overexpression from PMID: 30772301 | SOX2 |

|               |                                                                         |      |
|---------------|-------------------------------------------------------------------------|------|
| 5977 NDE1     | SOX2 regulated genes in Keratinocyte Overexpression from PMID: 30772301 | SOX2 |
| 5978 SKIV2L   | SOX2 regulated genes in Keratinocyte Overexpression from PMID: 30772301 | SOX2 |
| 5979 PRSS36   | SOX2 regulated genes in Keratinocyte Overexpression from PMID: 30772301 | SOX2 |
| 5980 RNF19A   | SOX2 regulated genes in Keratinocyte Overexpression from PMID: 30772301 | SOX2 |
| 5981 SOD2     | SOX2 regulated genes in Keratinocyte Overexpression from PMID: 30772301 | SOX2 |
| 5982 FXN      | SOX2 regulated genes in Keratinocyte Overexpression from PMID: 30772301 | SOX2 |
| 5983 NOXA1    | SOX2 regulated genes in Keratinocyte Overexpression from PMID: 30772301 | SOX2 |
| 5984 EXOSC6   | SOX2 regulated genes in Keratinocyte Overexpression from PMID: 30772301 | SOX2 |
| 5985 TRPV3    | SOX2 regulated genes in Keratinocyte Overexpression from PMID: 30772301 | SOX2 |
| 5986 TMEM115  | SOX2 regulated genes in Keratinocyte Overexpression from PMID: 30772301 | SOX2 |
| 5987 FBXO43   | SOX2 regulated genes in Keratinocyte Overexpression from PMID: 30772301 | SOX2 |
| 5988 PDIA2    | SOX2 regulated genes in Keratinocyte Overexpression from PMID: 30772301 | SOX2 |
| 5989 HAUS7    | SOX2 regulated genes in Keratinocyte Overexpression from PMID: 30772301 | SOX2 |
| 5990 IL17D    | SOX2 regulated genes in Keratinocyte Overexpression from PMID: 30772301 | SOX2 |
| 5991 RAD52    | SOX2 regulated genes in Keratinocyte Overexpression from PMID: 30772301 | SOX2 |
| 5992 INHBB    | SOX2 regulated genes in Keratinocyte Overexpression from PMID: 30772301 | SOX2 |
| 5993 FAM184B  | SOX2 regulated genes in Keratinocyte Overexpression from PMID: 30772301 | SOX2 |
| 5994 TAPT1    | SOX2 regulated genes in Keratinocyte Overexpression from PMID: 30772301 | SOX2 |
| 5995 UBXN2A   | SOX2 regulated genes in Keratinocyte Overexpression from PMID: 30772301 | SOX2 |
| 5996 SEMA4G   | SOX2 regulated genes in Keratinocyte Overexpression from PMID: 30772301 | SOX2 |
| 5997 CPT1A    | SOX2 regulated genes in Keratinocyte Overexpression from PMID: 30772301 | SOX2 |
| 5998 BRMS1    | SOX2 regulated genes in Keratinocyte Overexpression from PMID: 30772301 | SOX2 |
| 5999 ARHGEF26 | SOX2 regulated genes in Keratinocyte Overexpression from PMID: 30772301 | SOX2 |
| 6000 PTCO1    | SOX2 regulated genes in Keratinocyte Overexpression from PMID: 30772301 | SOX2 |
| 6001 CDKN1A   | SOX2 regulated genes in Keratinocyte Overexpression from PMID: 30772301 | SOX2 |
| 6002 CABLES2  | SOX2 regulated genes in Keratinocyte Overexpression from PMID: 30772301 | SOX2 |
| 6003 RBM22    | SOX2 regulated genes in Keratinocyte Overexpression from PMID: 30772301 | SOX2 |
| 6004 MTHFD2L  | SOX2 regulated genes in Keratinocyte Overexpression from PMID: 30772301 | SOX2 |
| 6005 DTX3     | SOX2 regulated genes in Keratinocyte Overexpression from PMID: 30772301 | SOX2 |
| 6006 SMARCA1  | SOX2 regulated genes in Keratinocyte Overexpression from PMID: 30772301 | SOX2 |
| 6007 DRD4     | SOX2 regulated genes in Keratinocyte Overexpression from PMID: 30772301 | SOX2 |
| 6008 KLK1     | SOX2 regulated genes in Keratinocyte Overexpression from PMID: 30772301 | SOX2 |
| 6009 LAMB1    | SOX2 regulated genes in Keratinocyte Overexpression from PMID: 30772301 | SOX2 |
| 6010 RNF185   | SOX2 regulated genes in Keratinocyte Overexpression from PMID: 30772301 | SOX2 |
| 6011 POLR1D   | SOX2 regulated genes in Keratinocyte Overexpression from PMID: 30772301 | SOX2 |
| 6012 GLE1     | SOX2 regulated genes in Keratinocyte Overexpression from PMID: 30772301 | SOX2 |
| 6013 CBY1     | SOX2 regulated genes in Keratinocyte Overexpression from PMID: 30772301 | SOX2 |
| 6014 SPOPL    | SOX2 regulated genes in Keratinocyte Overexpression from PMID: 30772301 | SOX2 |
| 6015 MASTL    | SOX2 regulated genes in Keratinocyte Overexpression from PMID: 30772301 | SOX2 |
| 6016 POLR2B   | SOX2 regulated genes in Keratinocyte Overexpression from PMID: 30772301 | SOX2 |
| 6017 RBM27    | SOX2 regulated genes in Keratinocyte Overexpression from PMID: 30772301 | SOX2 |
| 6018 KATNA1   | SOX2 regulated genes in Keratinocyte Overexpression from PMID: 30772301 | SOX2 |
| 6019 PALB2    | SOX2 regulated genes in Keratinocyte Overexpression from PMID: 30772301 | SOX2 |
| 6020 MCRC1    | SOX2 regulated genes in Keratinocyte Overexpression from PMID: 30772301 | SOX2 |
| 6021 GPR3     | SOX2 regulated genes in Keratinocyte Overexpression from PMID: 30772301 | SOX2 |
| 6022 MANF     | SOX2 regulated genes in Keratinocyte Overexpression from PMID: 30772301 | SOX2 |
| 6023 QRSL1    | SOX2 regulated genes in Keratinocyte Overexpression from PMID: 30772301 | SOX2 |
| 6024 SH3RF2   | SOX2 regulated genes in Keratinocyte Overexpression from PMID: 30772301 | SOX2 |
| 6025 RCOR2    | SOX2 regulated genes in Keratinocyte Overexpression from PMID: 30772301 | SOX2 |
| 6026 HIPK4    | SOX2 regulated genes in Keratinocyte Overexpression from PMID: 30772301 | SOX2 |
| 6027 NUP205   | SOX2 regulated genes in Keratinocyte Overexpression from PMID: 30772301 | SOX2 |
| 6028 NT5DC2   | SOX2 regulated genes in Keratinocyte Overexpression from PMID: 30772301 | SOX2 |
| 6029 ARPP19   | SOX2 regulated genes in Keratinocyte Overexpression from PMID: 30772301 | SOX2 |
| 6030 RNF7     | SOX2 regulated genes in Keratinocyte Overexpression from PMID: 30772301 | SOX2 |
| 6031 MAGOH    | SOX2 regulated genes in Keratinocyte Overexpression from PMID: 30772301 | SOX2 |
| 6032 ECHDC2   | SOX2 regulated genes in Keratinocyte Overexpression from PMID: 30772301 | SOX2 |
| 6033 MET      | SOX2 regulated genes in Keratinocyte Overexpression from PMID: 30772301 | SOX2 |
| 6034 MRPL52   | SOX2 regulated genes in Keratinocyte Overexpression from PMID: 30772301 | SOX2 |
| 6035 MRPL48   | SOX2 regulated genes in Keratinocyte Overexpression from PMID: 30772301 | SOX2 |
| 6036 YPEL3    | SOX2 regulated genes in Keratinocyte Overexpression from PMID: 30772301 | SOX2 |
| 6037 PPIF     | SOX2 regulated genes in Keratinocyte Overexpression from PMID: 30772301 | SOX2 |

|               |                                                                         |      |
|---------------|-------------------------------------------------------------------------|------|
| 6038 SRBD1    | SOX2 regulated genes in Keratinocyte Overexpression from PMID: 30772301 | SOX2 |
| 6039 RANBP3   | SOX2 regulated genes in Keratinocyte Overexpression from PMID: 30772301 | SOX2 |
| 6040 ZNF507   | SOX2 regulated genes in Keratinocyte Overexpression from PMID: 30772301 | SOX2 |
| 6041 NHLRC2   | SOX2 regulated genes in Keratinocyte Overexpression from PMID: 30772301 | SOX2 |
| 6042 OXSR1    | SOX2 regulated genes in Keratinocyte Overexpression from PMID: 30772301 | SOX2 |
| 6043 MRRF     | SOX2 regulated genes in Keratinocyte Overexpression from PMID: 30772301 | SOX2 |
| 6044 ESM1     | SOX2 regulated genes in Keratinocyte Overexpression from PMID: 30772301 | SOX2 |
| 6045 PIGO     | SOX2 regulated genes in Keratinocyte Overexpression from PMID: 30772301 | SOX2 |
| 6046 UTP3     | SOX2 regulated genes in Keratinocyte Overexpression from PMID: 30772301 | SOX2 |
| 6047 CBX4     | SOX2 regulated genes in Keratinocyte Overexpression from PMID: 30772301 | SOX2 |
| 6048 C6orf226 | SOX2 regulated genes in Keratinocyte Overexpression from PMID: 30772301 | SOX2 |
| 6049 PKMYT1   | SOX2 regulated genes in Keratinocyte Overexpression from PMID: 30772301 | SOX2 |
| 6050 ERICH5   | SOX2 regulated genes in Keratinocyte Overexpression from PMID: 30772301 | SOX2 |
| 6051 FBXW7    | SOX2 regulated genes in Keratinocyte Overexpression from PMID: 30772301 | SOX2 |
| 6052 CENPI    | SOX2 regulated genes in Keratinocyte Overexpression from PMID: 30772301 | SOX2 |
| 6053 CDKL3    | SOX2 regulated genes in Keratinocyte Overexpression from PMID: 30772301 | SOX2 |
| 6054 CCT4     | SOX2 regulated genes in Keratinocyte Overexpression from PMID: 30772301 | SOX2 |
| 6055 TRAPPC13 | SOX2 regulated genes in Keratinocyte Overexpression from PMID: 30772301 | SOX2 |
| 6056 INSIG1   | SOX2 regulated genes in Keratinocyte Overexpression from PMID: 30772301 | SOX2 |
| 6057 PRC1     | SOX2 regulated genes in Keratinocyte Overexpression from PMID: 30772301 | SOX2 |
| 6058 HIPK2    | SOX2 regulated genes in Keratinocyte Overexpression from PMID: 30772301 | SOX2 |
| 6059 FSBP     | SOX2 regulated genes in Keratinocyte Overexpression from PMID: 30772301 | SOX2 |
| 6060 PSMB1    | SOX2 regulated genes in Keratinocyte Overexpression from PMID: 30772301 | SOX2 |
| 6061 GCAT     | SOX2 regulated genes in Keratinocyte Overexpression from PMID: 30772301 | SOX2 |
| 6062 ZBTB44   | SOX2 regulated genes in Keratinocyte Overexpression from PMID: 30772301 | SOX2 |
| 6063 ORC6     | SOX2 regulated genes in Keratinocyte Overexpression from PMID: 30772301 | SOX2 |
| 6064 DERL1    | SOX2 regulated genes in Keratinocyte Overexpression from PMID: 30772301 | SOX2 |
| 6065 NUTF2    | SOX2 regulated genes in Keratinocyte Overexpression from PMID: 30772301 | SOX2 |
| 6066 UBE4B    | SOX2 regulated genes in Keratinocyte Overexpression from PMID: 30772301 | SOX2 |
| 6067 YLPM1    | SOX2 regulated genes in Keratinocyte Overexpression from PMID: 30772301 | SOX2 |
| 6068 GALT     | SOX2 regulated genes in Keratinocyte Overexpression from PMID: 30772301 | SOX2 |
| 6069 NR2C2AP  | SOX2 regulated genes in Keratinocyte Overexpression from PMID: 30772301 | SOX2 |
| 6070 RFWD3    | SOX2 regulated genes in Keratinocyte Overexpression from PMID: 30772301 | SOX2 |
| 6071 GINS2    | SOX2 regulated genes in Keratinocyte Overexpression from PMID: 30772301 | SOX2 |
| 6072 ETAA1    | SOX2 regulated genes in Keratinocyte Overexpression from PMID: 30772301 | SOX2 |
| 6073 PDCD2L   | SOX2 regulated genes in Keratinocyte Overexpression from PMID: 30772301 | SOX2 |
| 6074 NCBP2L   | SOX2 regulated genes in Keratinocyte Overexpression from PMID: 30772301 | SOX2 |
| 6075 CHP1     | SOX2 regulated genes in Keratinocyte Overexpression from PMID: 30772301 | SOX2 |
| 6076 BRPF3    | SOX2 regulated genes in Keratinocyte Overexpression from PMID: 30772301 | SOX2 |
| 6077 KRTAP9-4 | SOX2 regulated genes in Keratinocyte Overexpression from PMID: 30772301 | SOX2 |
| 6078 XPO4     | SOX2 regulated genes in Keratinocyte Overexpression from PMID: 30772301 | SOX2 |
| 6079 DDA1     | SOX2 regulated genes in Keratinocyte Overexpression from PMID: 30772301 | SOX2 |
| 6080 DOCK3    | SOX2 regulated genes in Keratinocyte Overexpression from PMID: 30772301 | SOX2 |
| 6081 ENO4     | SOX2 regulated genes in Keratinocyte Overexpression from PMID: 30772301 | SOX2 |
| 6082 TUSC2    | SOX2 regulated genes in Keratinocyte Overexpression from PMID: 30772301 | SOX2 |
| 6083 SPEN     | SOX2 regulated genes in Keratinocyte Overexpression from PMID: 30772301 | SOX2 |
| 6084 DHFR     | SOX2 regulated genes in Keratinocyte Overexpression from PMID: 30772301 | SOX2 |
| 6085 MED6     | SOX2 regulated genes in Keratinocyte Overexpression from PMID: 30772301 | SOX2 |
| 6086 KANK4    | SOX2 regulated genes in Keratinocyte Overexpression from PMID: 30772301 | SOX2 |
| 6087 FUS      | SOX2 regulated genes in Keratinocyte Overexpression from PMID: 30772301 | SOX2 |
| 6088 SGF29    | SOX2 regulated genes in Keratinocyte Overexpression from PMID: 30772301 | SOX2 |
| 6089 EPB41L5  | SOX2 regulated genes in Keratinocyte Overexpression from PMID: 30772301 | SOX2 |
| 6090 STAM2    | SOX2 regulated genes in Keratinocyte Overexpression from PMID: 30772301 | SOX2 |
| 6091 FEM1C    | SOX2 regulated genes in Keratinocyte Overexpression from PMID: 30772301 | SOX2 |
| 6092 CKAP2    | SOX2 regulated genes in Keratinocyte Overexpression from PMID: 30772301 | SOX2 |
| 6093 SLC25A25 | SOX2 regulated genes in Keratinocyte Overexpression from PMID: 30772301 | SOX2 |
| 6094 OXNAD1   | SOX2 regulated genes in Keratinocyte Overexpression from PMID: 30772301 | SOX2 |
| 6095 PPP6R1   | SOX2 regulated genes in Keratinocyte Overexpression from PMID: 30772301 | SOX2 |
| 6096 TMEM86B  | SOX2 regulated genes in Keratinocyte Overexpression from PMID: 30772301 | SOX2 |
| 6097 AGMAT    | SOX2 regulated genes in Keratinocyte Overexpression from PMID: 30772301 | SOX2 |
| 6098 DYNLRB2  | SOX2 regulated genes in Keratinocyte Overexpression from PMID: 30772301 | SOX2 |

|               |                                                                         |      |
|---------------|-------------------------------------------------------------------------|------|
| 6099 HYLS1    | SOX2 regulated genes in Keratinocyte Overexpression from PMID: 30772301 | SOX2 |
| 6100 ZNF398   | SOX2 regulated genes in Keratinocyte Overexpression from PMID: 30772301 | SOX2 |
| 6101 CMSS1    | SOX2 regulated genes in Keratinocyte Overexpression from PMID: 30772301 | SOX2 |
| 6102 CMTM8    | SOX2 regulated genes in Keratinocyte Overexpression from PMID: 30772301 | SOX2 |
| 6103 PDCD7    | SOX2 regulated genes in Keratinocyte Overexpression from PMID: 30772301 | SOX2 |
| 6104 MAP3K10  | SOX2 regulated genes in Keratinocyte Overexpression from PMID: 30772301 | SOX2 |
| 6105 CCDC65   | SOX2 regulated genes in Keratinocyte Overexpression from PMID: 30772301 | SOX2 |
| 6106 RDX      | SOX2 regulated genes in Keratinocyte Overexpression from PMID: 30772301 | SOX2 |
| 6107 NOA1     | SOX2 regulated genes in Keratinocyte Overexpression from PMID: 30772301 | SOX2 |
| 6108 RPA1     | SOX2 regulated genes in Keratinocyte Overexpression from PMID: 30772301 | SOX2 |
| 6109 DOC2A    | SOX2 regulated genes in Keratinocyte Overexpression from PMID: 30772301 | SOX2 |
| 6110 LARGE2   | SOX2 regulated genes in Keratinocyte Overexpression from PMID: 30772301 | SOX2 |
| 6111 GABRE    | SOX2 regulated genes in Keratinocyte Overexpression from PMID: 30772301 | SOX2 |
| 6112 MED13    | SOX2 regulated genes in Keratinocyte Overexpression from PMID: 30772301 | SOX2 |
| 6113 IRF2BP1  | SOX2 regulated genes in Keratinocyte Overexpression from PMID: 30772301 | SOX2 |
| 6114 RBM19    | SOX2 regulated genes in Keratinocyte Overexpression from PMID: 30772301 | SOX2 |
| 6115 AMTN     | SOX2 regulated genes in Keratinocyte Overexpression from PMID: 30772301 | SOX2 |
| 6116 PROM2    | SOX2 regulated genes in Keratinocyte Overexpression from PMID: 30772301 | SOX2 |
| 6117 JUP      | SOX2 regulated genes in Keratinocyte Overexpression from PMID: 30772301 | SOX2 |
| 6118 CTR9     | SOX2 regulated genes in Keratinocyte Overexpression from PMID: 30772301 | SOX2 |
| 6119 FRMPD1   | SOX2 regulated genes in Keratinocyte Overexpression from PMID: 30772301 | SOX2 |
| 6120 SLC5A8   | SOX2 regulated genes in Keratinocyte Overexpression from PMID: 30772301 | SOX2 |
| 6121 HSPA1A   | SOX2 regulated genes in Keratinocyte Overexpression from PMID: 30772301 | SOX2 |
| 6122 HSPA1B   | SOX2 regulated genes in Keratinocyte Overexpression from PMID: 30772301 | SOX2 |
| 6123 PNOG     | SOX2 regulated genes in Keratinocyte Overexpression from PMID: 30772301 | SOX2 |
| 6124 GRHL2    | SOX2 regulated genes in Keratinocyte Overexpression from PMID: 30772301 | SOX2 |
| 6125 KANK1    | SOX2 regulated genes in Keratinocyte Overexpression from PMID: 30772301 | SOX2 |
| 6126 ARFGEF1  | SOX2 regulated genes in Keratinocyte Overexpression from PMID: 30772301 | SOX2 |
| 6127 NOL7     | SOX2 regulated genes in Keratinocyte Overexpression from PMID: 30772301 | SOX2 |
| 6128 NAF1     | SOX2 regulated genes in Keratinocyte Overexpression from PMID: 30772301 | SOX2 |
| 6129 RHCG     | SOX2 regulated genes in Keratinocyte Overexpression from PMID: 30772301 | SOX2 |
| 6130 ATP6V1C1 | SOX2 regulated genes in Keratinocyte Overexpression from PMID: 30772301 | SOX2 |
| 6131 ZNF212   | SOX2 regulated genes in Keratinocyte Overexpression from PMID: 30772301 | SOX2 |
| 6132 MAD1L1   | SOX2 regulated genes in Keratinocyte Overexpression from PMID: 30772301 | SOX2 |
| 6133 GRPEL2   | SOX2 regulated genes in Keratinocyte Overexpression from PMID: 30772301 | SOX2 |
| 6134 UBE3C    | SOX2 regulated genes in Keratinocyte Overexpression from PMID: 30772301 | SOX2 |
| 6135 TMEM147  | SOX2 regulated genes in Keratinocyte Overexpression from PMID: 30772301 | SOX2 |
| 6136 C16orf87 | SOX2 regulated genes in Keratinocyte Overexpression from PMID: 30772301 | SOX2 |
| 6137 DYNLT1   | SOX2 regulated genes in Keratinocyte Overexpression from PMID: 30772301 | SOX2 |
| 6138 NRF1     | SOX2 regulated genes in Keratinocyte Overexpression from PMID: 30772301 | SOX2 |
| 6139 CRHBP    | SOX2 regulated genes in Keratinocyte Overexpression from PMID: 30772301 | SOX2 |
| 6140 SGTB     | SOX2 regulated genes in Keratinocyte Overexpression from PMID: 30772301 | SOX2 |
| 6141 IDI2     | SOX2 regulated genes in Keratinocyte Overexpression from PMID: 30772301 | SOX2 |
| 6142 TIMM17B  | SOX2 regulated genes in Keratinocyte Overexpression from PMID: 30772301 | SOX2 |
| 6143 MATN4    | SOX2 regulated genes in Keratinocyte Overexpression from PMID: 30772301 | SOX2 |
| 6144 COL12A1  | SOX2 regulated genes in Keratinocyte Overexpression from PMID: 30772301 | SOX2 |
| 6145 FBXO32   | SOX2 regulated genes in Keratinocyte Overexpression from PMID: 30772301 | SOX2 |
| 6146 COX6A1   | SOX2 regulated genes in Keratinocyte Overexpression from PMID: 30772301 | SOX2 |
| 6147 EIF3J    | SOX2 regulated genes in Keratinocyte Overexpression from PMID: 30772301 | SOX2 |
| 6148 SOWAHA   | SOX2 regulated genes in Keratinocyte Overexpression from PMID: 30772301 | SOX2 |
| 6149 VCL      | SOX2 regulated genes in Keratinocyte Overexpression from PMID: 30772301 | SOX2 |
| 6150 PHF20L1  | SOX2 regulated genes in Keratinocyte Overexpression from PMID: 30772301 | SOX2 |
| 6151 RAPGEF4  | SOX2 regulated genes in Keratinocyte Overexpression from PMID: 30772301 | SOX2 |
| 6152 METTL17  | SOX2 regulated genes in Keratinocyte Overexpression from PMID: 30772301 | SOX2 |
| 6153 SCRIB    | SOX2 regulated genes in Keratinocyte Overexpression from PMID: 30772301 | SOX2 |
| 6154 SHISA2   | SOX2 regulated genes in Keratinocyte Overexpression from PMID: 30772301 | SOX2 |
| 6155 PBX2     | SOX2 regulated genes in Keratinocyte Overexpression from PMID: 30772301 | SOX2 |
| 6156 SYTL1    | SOX2 regulated genes in Keratinocyte Overexpression from PMID: 30772301 | SOX2 |
| 6157 RNF103   | SOX2 regulated genes in Keratinocyte Overexpression from PMID: 30772301 | SOX2 |
| 6158 KMT5B    | SOX2 regulated genes in Keratinocyte Overexpression from PMID: 30772301 | SOX2 |
| 6159 SMG9     | SOX2 regulated genes in Keratinocyte Overexpression from PMID: 30772301 | SOX2 |

|               |                                                                         |      |
|---------------|-------------------------------------------------------------------------|------|
| 6160 ALX1     | SOX2 regulated genes in Keratinocyte Overexpression from PMID: 30772301 | SOX2 |
| 6161 IFT57    | SOX2 regulated genes in Keratinocyte Overexpression from PMID: 30772301 | SOX2 |
| 6162 LRRC74A  | SOX2 regulated genes in Keratinocyte Overexpression from PMID: 30772301 | SOX2 |
| 6163 CPT2     | SOX2 regulated genes in Keratinocyte Overexpression from PMID: 30772301 | SOX2 |
| 6164 NUDT14   | SOX2 regulated genes in Keratinocyte Overexpression from PMID: 30772301 | SOX2 |
| 6165 COPS5    | SOX2 regulated genes in Keratinocyte Overexpression from PMID: 30772301 | SOX2 |
| 6166 LANCL1   | SOX2 regulated genes in Keratinocyte Overexpression from PMID: 30772301 | SOX2 |
| 6167 TTC9C    | SOX2 regulated genes in Keratinocyte Overexpression from PMID: 30772301 | SOX2 |
| 6168 COX18    | SOX2 regulated genes in Keratinocyte Overexpression from PMID: 30772301 | SOX2 |
| 6169 RSPH9    | SOX2 regulated genes in Keratinocyte Overexpression from PMID: 30772301 | SOX2 |
| 6170 SARS2    | SOX2 regulated genes in Keratinocyte Overexpression from PMID: 30772301 | SOX2 |
| 6171 FIS1     | SOX2 regulated genes in Keratinocyte Overexpression from PMID: 30772301 | SOX2 |
| 6172 POLE3    | SOX2 regulated genes in Keratinocyte Overexpression from PMID: 30772301 | SOX2 |
| 6173 SSNA1    | SOX2 regulated genes in Keratinocyte Overexpression from PMID: 30772301 | SOX2 |
| 6174 GPAA1    | SOX2 regulated genes in Keratinocyte Overexpression from PMID: 30772301 | SOX2 |
| 6175 MRE11    | SOX2 regulated genes in Keratinocyte Overexpression from PMID: 30772301 | SOX2 |
| 6176 UBE3A    | SOX2 regulated genes in Keratinocyte Overexpression from PMID: 30772301 | SOX2 |
| 6177 SPOP     | SOX2 regulated genes in Keratinocyte Overexpression from PMID: 30772301 | SOX2 |
| 6178 POC5     | SOX2 regulated genes in Keratinocyte Overexpression from PMID: 30772301 | SOX2 |
| 6179 HSPA5    | SOX2 regulated genes in Keratinocyte Overexpression from PMID: 30772301 | SOX2 |
| 6180 PDCL3    | SOX2 regulated genes in Keratinocyte Overexpression from PMID: 30772301 | SOX2 |
| 6181 PSMA2    | SOX2 regulated genes in Keratinocyte Overexpression from PMID: 30772301 | SOX2 |
| 6182 ALDH5A1  | SOX2 regulated genes in Keratinocyte Overexpression from PMID: 30772301 | SOX2 |
| 6183 MRPS23   | SOX2 regulated genes in Keratinocyte Overexpression from PMID: 30772301 | SOX2 |
| 6184 TFB1M    | SOX2 regulated genes in Keratinocyte Overexpression from PMID: 30772301 | SOX2 |
| 6185 PANK3    | SOX2 regulated genes in Keratinocyte Overexpression from PMID: 30772301 | SOX2 |
| 6186 CDK12    | SOX2 regulated genes in Keratinocyte Overexpression from PMID: 30772301 | SOX2 |
| 6187 CCDC60   | SOX2 regulated genes in Keratinocyte Overexpression from PMID: 30772301 | SOX2 |
| 6188 DAPK2    | SOX2 regulated genes in Keratinocyte Overexpression from PMID: 30772301 | SOX2 |
| 6189 LAS1L    | SOX2 regulated genes in Keratinocyte Overexpression from PMID: 30772301 | SOX2 |
| 6190 DCTD     | SOX2 regulated genes in Keratinocyte Overexpression from PMID: 30772301 | SOX2 |
| 6191 PCYOX1L  | SOX2 regulated genes in Keratinocyte Overexpression from PMID: 30772301 | SOX2 |
| 6192 NUDCD2   | SOX2 regulated genes in Keratinocyte Overexpression from PMID: 30772301 | SOX2 |
| 6193 MCM6     | SOX2 regulated genes in Keratinocyte Overexpression from PMID: 30772301 | SOX2 |
| 6194 CPA5     | SOX2 regulated genes in Keratinocyte Overexpression from PMID: 30772301 | SOX2 |
| 6195 HES5     | SOX2 regulated genes in Keratinocyte Overexpression from PMID: 30772301 | SOX2 |
| 6196 APOL3    | SOX2 regulated genes in Keratinocyte Overexpression from PMID: 30772301 | SOX2 |
| 6197 APOL4    | SOX2 regulated genes in Keratinocyte Overexpression from PMID: 30772301 | SOX2 |
| 6198 APOL2    | SOX2 regulated genes in Keratinocyte Overexpression from PMID: 30772301 | SOX2 |
| 6199 APOL1    | SOX2 regulated genes in Keratinocyte Overexpression from PMID: 30772301 | SOX2 |
| 6200 MPZL2    | SOX2 regulated genes in Keratinocyte Overexpression from PMID: 30772301 | SOX2 |
| 6201 SPRED2   | SOX2 regulated genes in Keratinocyte Overexpression from PMID: 30772301 | SOX2 |
| 6202 RPEL1    | SOX2 regulated genes in Keratinocyte Overexpression from PMID: 30772301 | SOX2 |
| 6203 RPE      | SOX2 regulated genes in Keratinocyte Overexpression from PMID: 30772301 | SOX2 |
| 6204 CFL1     | SOX2 regulated genes in Keratinocyte Overexpression from PMID: 30772301 | SOX2 |
| 6205 DUSP19   | SOX2 regulated genes in Keratinocyte Overexpression from PMID: 30772301 | SOX2 |
| 6206 CCDC15   | SOX2 regulated genes in Keratinocyte Overexpression from PMID: 30772301 | SOX2 |
| 6207 MAPK8IP1 | SOX2 regulated genes in Keratinocyte Overexpression from PMID: 30772301 | SOX2 |
| 6208 CAPN1    | SOX2 regulated genes in Keratinocyte Overexpression from PMID: 30772301 | SOX2 |
| 6209 TECTA    | SOX2 regulated genes in Keratinocyte Overexpression from PMID: 30772301 | SOX2 |
| 6210 ELP3     | SOX2 regulated genes in Keratinocyte Overexpression from PMID: 30772301 | SOX2 |
| 6211 PPAT     | SOX2 regulated genes in Keratinocyte Overexpression from PMID: 30772301 | SOX2 |
| 6212 RFX3     | SOX2 regulated genes in Keratinocyte Overexpression from PMID: 30772301 | SOX2 |
| 6213 FAM227A  | SOX2 regulated genes in Keratinocyte Overexpression from PMID: 30772301 | SOX2 |
| 6214 MRPL18   | SOX2 regulated genes in Keratinocyte Overexpression from PMID: 30772301 | SOX2 |
| 6215 TRIM2    | SOX2 regulated genes in Keratinocyte Overexpression from PMID: 30772301 | SOX2 |
| 6216 ASAP2    | SOX2 regulated genes in Keratinocyte Overexpression from PMID: 30772301 | SOX2 |
| 6217 SIAH1    | SOX2 regulated genes in Keratinocyte Overexpression from PMID: 30772301 | SOX2 |
| 6218 ATP1B3   | SOX2 regulated genes in Keratinocyte Overexpression from PMID: 30772301 | SOX2 |
| 6219 CYB5D1   | SOX2 regulated genes in Keratinocyte Overexpression from PMID: 30772301 | SOX2 |
| 6220 SRF      | SOX2 regulated genes in Keratinocyte Overexpression from PMID: 30772301 | SOX2 |



|      |               |                                                                         |      |
|------|---------------|-------------------------------------------------------------------------|------|
| 6221 | CPSF1         | SOX2 regulated genes in Keratinocyte Overexpression from PMID: 30772301 | SOX2 |
| 6222 | DTWD2         | SOX2 regulated genes in Keratinocyte Overexpression from PMID: 30772301 | SOX2 |
| 6223 | SEC24C        | SOX2 regulated genes in Keratinocyte Overexpression from PMID: 30772301 | SOX2 |
| 6224 | GNE           | SOX2 regulated genes in Keratinocyte Overexpression from PMID: 30772301 | SOX2 |
| 6225 | PTCH1         | SOX2 regulated genes in Keratinocyte Overexpression from PMID: 30772301 | SOX2 |
| 6226 | ZNF282        | SOX2 regulated genes in Keratinocyte Overexpression from PMID: 30772301 | SOX2 |
| 6227 | MTOR          | SOX2 regulated genes in Keratinocyte Overexpression from PMID: 30772301 | SOX2 |
| 6228 | SUPT5H        | SOX2 regulated genes in Keratinocyte Overexpression from PMID: 30772301 | SOX2 |
| 6229 | ATP8A2        | SOX2 regulated genes in Keratinocyte Overexpression from PMID: 30772301 | SOX2 |
| 6230 | GDPD3         | SOX2 regulated genes in Keratinocyte Overexpression from PMID: 30772301 | SOX2 |
| 6231 | IFFO2         | SOX2 regulated genes in Keratinocyte Overexpression from PMID: 30772301 | SOX2 |
| 6232 | RCN1          | SOX2 regulated genes in Keratinocyte Overexpression from PMID: 30772301 | SOX2 |
| 6233 | MBTD1         | SOX2 regulated genes in Keratinocyte Overexpression from PMID: 30772301 | SOX2 |
| 6234 | GCSH          | SOX2 regulated genes in Keratinocyte Overexpression from PMID: 30772301 | SOX2 |
| 6235 | SLBP          | SOX2 regulated genes in Keratinocyte Overexpression from PMID: 30772301 | SOX2 |
| 6236 | DOCK9         | SOX2 regulated genes in Keratinocyte Overexpression from PMID: 30772301 | SOX2 |
| 6237 | COQ5          | SOX2 regulated genes in Keratinocyte Overexpression from PMID: 30772301 | SOX2 |
| 6238 | POLR2G        | SOX2 regulated genes in Keratinocyte Overexpression from PMID: 30772301 | SOX2 |
| 6239 | WDR20         | SOX2 regulated genes in Keratinocyte Overexpression from PMID: 30772301 | SOX2 |
| 6240 | RBM28         | SOX2 regulated genes in Keratinocyte Overexpression from PMID: 30772301 | SOX2 |
| 6241 | MRPS30        | SOX2 regulated genes in Keratinocyte Overexpression from PMID: 30772301 | SOX2 |
| 6242 | PWWP2B        | SOX2 regulated genes in Keratinocyte Overexpression from PMID: 30772301 | SOX2 |
| 6243 | AP4S1         | SOX2 regulated genes in Keratinocyte Overexpression from PMID: 30772301 | SOX2 |
| 6244 | ALCAM         | SOX2 regulated genes in Keratinocyte Overexpression from PMID: 30772301 | SOX2 |
| 6245 | JMJD7-PLA2G4B | SOX2 regulated genes in Keratinocyte Overexpression from PMID: 30772301 | SOX2 |
| 6246 | HYAL4         | SOX2 regulated genes in Keratinocyte Overexpression from PMID: 30772301 | SOX2 |
| 6247 | NUBP1         | SOX2 regulated genes in Keratinocyte Overexpression from PMID: 30772301 | SOX2 |
| 6248 | HADHB         | SOX2 regulated genes in Keratinocyte Overexpression from PMID: 30772301 | SOX2 |
| 6249 | SPINK9        | SOX2 regulated genes in Keratinocyte Overexpression from PMID: 30772301 | SOX2 |
| 6250 | CCP110        | SOX2 regulated genes in Keratinocyte Overexpression from PMID: 30772301 | SOX2 |
| 6251 | FAAP100       | SOX2 regulated genes in Keratinocyte Overexpression from PMID: 30772301 | SOX2 |
| 6252 | JAKMIP2       | SOX2 regulated genes in Keratinocyte Overexpression from PMID: 30772301 | SOX2 |
| 6253 | DMTF1         | SOX2 regulated genes in Keratinocyte Overexpression from PMID: 30772301 | SOX2 |
| 6254 | NDOR1         | SOX2 regulated genes in Keratinocyte Overexpression from PMID: 30772301 | SOX2 |
| 6255 | UBE3D         | SOX2 regulated genes in Keratinocyte Overexpression from PMID: 30772301 | SOX2 |
| 6256 | ANAPC1        | SOX2 regulated genes in Keratinocyte Overexpression from PMID: 30772301 | SOX2 |
| 6257 | CALML3        | SOX2 regulated genes in Keratinocyte Overexpression from PMID: 30772301 | SOX2 |
| 6258 | HSPA8         | SOX2 regulated genes in Keratinocyte Overexpression from PMID: 30772301 | SOX2 |
| 6259 | SF3B5         | SOX2 regulated genes in Keratinocyte Overexpression from PMID: 30772301 | SOX2 |
| 6260 | FOSL2         | SOX2 regulated genes in Keratinocyte Overexpression from PMID: 30772301 | SOX2 |
| 6261 | MREG          | SOX2 regulated genes in Keratinocyte Overexpression from PMID: 30772301 | SOX2 |
| 6262 | DNPH1         | SOX2 regulated genes in Keratinocyte Overexpression from PMID: 30772301 | SOX2 |
| 6263 | GPC2          | SOX2 regulated genes in Keratinocyte Overexpression from PMID: 30772301 | SOX2 |
| 6264 | MTMR2         | SOX2 regulated genes in Keratinocyte Overexpression from PMID: 30772301 | SOX2 |
| 6265 | TOP2A         | SOX2 regulated genes in Keratinocyte Overexpression from PMID: 30772301 | SOX2 |
| 6266 | WDR70         | SOX2 regulated genes in Keratinocyte Overexpression from PMID: 30772301 | SOX2 |
| 6267 | PEX6          | SOX2 regulated genes in Keratinocyte Overexpression from PMID: 30772301 | SOX2 |
| 6268 | ADAT2         | SOX2 regulated genes in Keratinocyte Overexpression from PMID: 30772301 | SOX2 |
| 6269 | LYPD5         | SOX2 regulated genes in Keratinocyte Overexpression from PMID: 30772301 | SOX2 |
| 6270 | PTPN1         | SOX2 regulated genes in Keratinocyte Overexpression from PMID: 30772301 | SOX2 |
| 6271 | C10orf95      | SOX2 regulated genes in Keratinocyte Overexpression from PMID: 30772301 | SOX2 |
| 6272 | TNKS1BP1      | SOX2 regulated genes in Keratinocyte Overexpression from PMID: 30772301 | SOX2 |
| 6273 | SLC22A23      | SOX2 regulated genes in Keratinocyte Overexpression from PMID: 30772301 | SOX2 |
| 6274 | CACFD1        | SOX2 regulated genes in Keratinocyte Overexpression from PMID: 30772301 | SOX2 |
| 6275 | SUGP1         | SOX2 regulated genes in Keratinocyte Overexpression from PMID: 30772301 | SOX2 |
| 6276 | ZNF786        | SOX2 regulated genes in Keratinocyte Overexpression from PMID: 30772301 | SOX2 |
| 6277 | EHD1          | SOX2 regulated genes in Keratinocyte Overexpression from PMID: 30772301 | SOX2 |
| 6278 | ARG1          | SOX2 regulated genes in Keratinocyte Overexpression from PMID: 30772301 | SOX2 |
| 6279 | WNT10B        | SOX2 regulated genes in Keratinocyte Overexpression from PMID: 30772301 | SOX2 |
| 6280 | LIG1          | SOX2 regulated genes in Keratinocyte Overexpression from PMID: 30772301 | SOX2 |
| 6281 | HILPDA        | SOX2 regulated genes in Keratinocyte Overexpression from PMID: 30772301 | SOX2 |

|      |          |                                                                         |      |
|------|----------|-------------------------------------------------------------------------|------|
| 6282 | RABGAP1  | SOX2 regulated genes in Keratinocyte Overexpression from PMID: 30772301 | SOX2 |
| 6283 | EDAR     | SOX2 regulated genes in Keratinocyte Overexpression from PMID: 30772301 | SOX2 |
| 6284 | HADHA    | SOX2 regulated genes in Keratinocyte Overexpression from PMID: 30772301 | SOX2 |
| 6285 | ADM      | SOX2 regulated genes in Keratinocyte Overexpression from PMID: 30772301 | SOX2 |
| 6286 | TMCO3    | SOX2 regulated genes in Keratinocyte Overexpression from PMID: 30772301 | SOX2 |
| 6287 | HNF4G    | SOX2 regulated genes in Keratinocyte Overexpression from PMID: 30772301 | SOX2 |
| 6288 | SNIP1    | SOX2 regulated genes in Keratinocyte Overexpression from PMID: 30772301 | SOX2 |
| 6289 | KBTBD6   | SOX2 regulated genes in Keratinocyte Overexpression from PMID: 30772301 | SOX2 |
| 6290 | KBTBD7   | SOX2 regulated genes in Keratinocyte Overexpression from PMID: 30772301 | SOX2 |
| 6291 | PAX1     | SOX2 regulated genes in Keratinocyte Overexpression from PMID: 30772301 | SOX2 |
| 6292 | TOMM6    | SOX2 regulated genes in Keratinocyte Overexpression from PMID: 30772301 | SOX2 |
| 6293 | ATP10B   | SOX2 regulated genes in Keratinocyte Overexpression from PMID: 30772301 | SOX2 |
| 6294 | KAT5     | SOX2 regulated genes in Keratinocyte Overexpression from PMID: 30772301 | SOX2 |
| 6295 | MTERF4   | SOX2 regulated genes in Keratinocyte Overexpression from PMID: 30772301 | SOX2 |
| 6296 | MAP3K15  | SOX2 regulated genes in Keratinocyte Overexpression from PMID: 30772301 | SOX2 |
| 6297 | NIPAL1   | SOX2 regulated genes in Keratinocyte Overexpression from PMID: 30772301 | SOX2 |
| 6298 | PUS10    | SOX2 regulated genes in Keratinocyte Overexpression from PMID: 30772301 | SOX2 |
| 6299 | ANAPC5   | SOX2 regulated genes in Keratinocyte Overexpression from PMID: 30772301 | SOX2 |
| 6300 | RDH10    | SOX2 regulated genes in Keratinocyte Overexpression from PMID: 30772301 | SOX2 |
| 6301 | NOP14    | SOX2 regulated genes in Keratinocyte Overexpression from PMID: 30772301 | SOX2 |
| 6302 | SPATA20  | SOX2 regulated genes in Keratinocyte Overexpression from PMID: 30772301 | SOX2 |
| 6303 | TACSTD2  | SOX2 regulated genes in Keratinocyte Overexpression from PMID: 30772301 | SOX2 |
| 6304 | MED29    | SOX2 regulated genes in Keratinocyte Overexpression from PMID: 30772301 | SOX2 |
| 6305 | DMAP1    | SOX2 regulated genes in Keratinocyte Overexpression from PMID: 30772301 | SOX2 |
| 6306 | JOSD2    | SOX2 regulated genes in Keratinocyte Overexpression from PMID: 30772301 | SOX2 |
| 6307 | TMPRSS13 | SOX2 regulated genes in Keratinocyte Overexpression from PMID: 30772301 | SOX2 |
| 6308 | KIF26A   | SOX2 regulated genes in Keratinocyte Overexpression from PMID: 30772301 | SOX2 |
| 6309 | TRPV6    | SOX2 regulated genes in Keratinocyte Overexpression from PMID: 30772301 | SOX2 |
| 6310 | CDKN3    | SOX2 regulated genes in Keratinocyte Overexpression from PMID: 30772301 | SOX2 |
| 6311 | TLL10    | SOX2 regulated genes in Keratinocyte Overexpression from PMID: 30772301 | SOX2 |
| 6312 | RTN4IP1  | SOX2 regulated genes in Keratinocyte Overexpression from PMID: 30772301 | SOX2 |
| 6313 | TMEM35A  | SOX2 regulated genes in Keratinocyte Overexpression from PMID: 30772301 | SOX2 |
| 6314 | TRIB1    | SOX2 regulated genes in Keratinocyte Overexpression from PMID: 30772301 | SOX2 |
| 6315 | IZUMO1   | SOX2 regulated genes in Keratinocyte Overexpression from PMID: 30772301 | SOX2 |
| 6316 | TMEM134  | SOX2 regulated genes in Keratinocyte Overexpression from PMID: 30772301 | SOX2 |
| 6317 | ABC88    | SOX2 regulated genes in Keratinocyte Overexpression from PMID: 30772301 | SOX2 |
| 6318 | YEATS4   | SOX2 regulated genes in Keratinocyte Overexpression from PMID: 30772301 | SOX2 |
| 6319 | RAD54B   | SOX2 regulated genes in Keratinocyte Overexpression from PMID: 30772301 | SOX2 |
| 6320 | SCUBE1   | SOX2 regulated genes in Keratinocyte Overexpression from PMID: 30772301 | SOX2 |
| 6321 | OGDHL    | SOX2 regulated genes in Keratinocyte Overexpression from PMID: 30772301 | SOX2 |
| 6322 | SCNN1G   | SOX2 regulated genes in Keratinocyte Overexpression from PMID: 30772301 | SOX2 |
| 6323 | CEBPB    | SOX2 regulated genes in Keratinocyte Overexpression from PMID: 30772301 | SOX2 |
| 6324 | RAD51C   | SOX2 regulated genes in Keratinocyte Overexpression from PMID: 30772301 | SOX2 |
| 6325 | SERPINA1 | SOX2 regulated genes in Keratinocyte Overexpression from PMID: 30772301 | SOX2 |
| 6326 | NIPAL2   | SOX2 regulated genes in Keratinocyte Overexpression from PMID: 30772301 | SOX2 |
| 6327 | PTPRK    | SOX2 regulated genes in Keratinocyte Overexpression from PMID: 30772301 | SOX2 |
| 6328 | B3GNT4   | SOX2 regulated genes in Keratinocyte Overexpression from PMID: 30772301 | SOX2 |
| 6329 | ALDH3A2  | SOX2 regulated genes in Keratinocyte Overexpression from PMID: 30772301 | SOX2 |
| 6330 | KITLG    | SOX2 regulated genes in Keratinocyte Overexpression from PMID: 30772301 | SOX2 |
| 6331 | PRRC2B   | SOX2 regulated genes in Keratinocyte Overexpression from PMID: 30772301 | SOX2 |
| 6332 | HAT1     | SOX2 regulated genes in Keratinocyte Overexpression from PMID: 30772301 | SOX2 |
| 6333 | NDST1    | SOX2 regulated genes in Keratinocyte Overexpression from PMID: 30772301 | SOX2 |
| 6334 | SLC25A13 | SOX2 regulated genes in Keratinocyte Overexpression from PMID: 30772301 | SOX2 |
| 6335 | FAM102A  | SOX2 regulated genes in Keratinocyte Overexpression from PMID: 30772301 | SOX2 |
| 6336 | CCND2    | SOX2 regulated genes in Keratinocyte Overexpression from PMID: 30772301 | SOX2 |
| 6337 | PAFAH1B2 | SOX2 regulated genes in Keratinocyte Overexpression from PMID: 30772301 | SOX2 |
| 6338 | UBE2E3   | SOX2 regulated genes in Keratinocyte Overexpression from PMID: 30772301 | SOX2 |
| 6339 | ZNF169   | SOX2 regulated genes in Keratinocyte Overexpression from PMID: 30772301 | SOX2 |
| 6340 | SLC4A2   | SOX2 regulated genes in Keratinocyte Overexpression from PMID: 30772301 | SOX2 |
| 6341 | SLC22A1  | SOX2 regulated genes in Keratinocyte Overexpression from PMID: 30772301 | SOX2 |
| 6342 | SFRP1    | SOX2 regulated genes in Keratinocyte Overexpression from PMID: 30772301 | SOX2 |

|               |                                                                         |      |
|---------------|-------------------------------------------------------------------------|------|
| 6343 E2F5     | SOX2 regulated genes in Keratinocyte Overexpression from PMID: 30772301 | SOX2 |
| 6344 CHRM5    | SOX2 regulated genes in Keratinocyte Overexpression from PMID: 30772301 | SOX2 |
| 6345 GTF3C1   | SOX2 regulated genes in Keratinocyte Overexpression from PMID: 30772301 | SOX2 |
| 6346 NXT1     | SOX2 regulated genes in Keratinocyte Overexpression from PMID: 30772301 | SOX2 |
| 6347 TULP1    | SOX2 regulated genes in Keratinocyte Overexpression from PMID: 30772301 | SOX2 |
| 6348 EPHB6    | SOX2 regulated genes in Keratinocyte Overexpression from PMID: 30772301 | SOX2 |
| 6349 ATOH8    | SOX2 regulated genes in Keratinocyte Overexpression from PMID: 30772301 | SOX2 |
| 6350 HAUS5    | SOX2 regulated genes in Keratinocyte Overexpression from PMID: 30772301 | SOX2 |
| 6351 RABGEF1  | SOX2 regulated genes in Keratinocyte Overexpression from PMID: 30772301 | SOX2 |
| 6352 ZMYM2    | SOX2 regulated genes in Keratinocyte Overexpression from PMID: 30772301 | SOX2 |
| 6353 STBD1    | SOX2 regulated genes in Keratinocyte Overexpression from PMID: 30772301 | SOX2 |
| 6354 ZDHHC6   | SOX2 regulated genes in Keratinocyte Overexpression from PMID: 30772301 | SOX2 |
| 6355 MAD2L1BP | SOX2 regulated genes in Keratinocyte Overexpression from PMID: 30772301 | SOX2 |
| 6356 PSMB2    | SOX2 regulated genes in Keratinocyte Overexpression from PMID: 30772301 | SOX2 |
| 6357 DDX51    | SOX2 regulated genes in Keratinocyte Overexpression from PMID: 30772301 | SOX2 |
| 6358 MED7     | SOX2 regulated genes in Keratinocyte Overexpression from PMID: 30772301 | SOX2 |
| 6359 NECTIN3  | SOX2 regulated genes in Keratinocyte Overexpression from PMID: 30772301 | SOX2 |
| 6360 KRT6A    | SOX2 regulated genes in Keratinocyte Overexpression from PMID: 30772301 | SOX2 |
| 6361 CNOT6    | SOX2 regulated genes in Keratinocyte Overexpression from PMID: 30772301 | SOX2 |
| 6362 ZBTB39   | SOX2 regulated genes in Keratinocyte Overexpression from PMID: 30772301 | SOX2 |
| 6363 STAG2    | SOX2 regulated genes in Keratinocyte Overexpression from PMID: 30772301 | SOX2 |
| 6364 ZSCAN25  | SOX2 regulated genes in Keratinocyte Overexpression from PMID: 30772301 | SOX2 |
| 6365 RHOG     | SOX2 regulated genes in Keratinocyte Overexpression from PMID: 30772301 | SOX2 |
| 6366 CYP4F12  | SOX2 regulated genes in Keratinocyte Overexpression from PMID: 30772301 | SOX2 |
| 6367 KAT2B    | SOX2 regulated genes in Keratinocyte Overexpression from PMID: 30772301 | SOX2 |
| 6368 ANAPC2   | SOX2 regulated genes in Keratinocyte Overexpression from PMID: 30772301 | SOX2 |
| 6369 FRAS1    | SOX2 regulated genes in Keratinocyte Overexpression from PMID: 30772301 | SOX2 |
| 6370 SLX1B    | SOX2 regulated genes in Keratinocyte Overexpression from PMID: 30772301 | SOX2 |
| 6371 SLX1A    | SOX2 regulated genes in Keratinocyte Overexpression from PMID: 30772301 | SOX2 |
| 6372 CKAP2L   | SOX2 regulated genes in Keratinocyte Overexpression from PMID: 30772301 | SOX2 |
| 6373 CDCP1    | SOX2 regulated genes in Keratinocyte Overexpression from PMID: 30772301 | SOX2 |
| 6374 NRARP    | SOX2 regulated genes in Keratinocyte Overexpression from PMID: 30772301 | SOX2 |
| 6375 PNO1     | SOX2 regulated genes in Keratinocyte Overexpression from PMID: 30772301 | SOX2 |
| 6376 VCP      | SOX2 regulated genes in Keratinocyte Overexpression from PMID: 30772301 | SOX2 |
| 6377 HECW2    | SOX2 regulated genes in Keratinocyte Overexpression from PMID: 30772301 | SOX2 |
| 6378 ABHD17B  | SOX2 regulated genes in Keratinocyte Overexpression from PMID: 30772301 | SOX2 |
| 6379 DNTTIP2  | SOX2 regulated genes in Keratinocyte Overexpression from PMID: 30772301 | SOX2 |
| 6380 LIPM     | SOX2 regulated genes in Keratinocyte Overexpression from PMID: 30772301 | SOX2 |
| 6381 HOXB8    | SOX2 regulated genes in Keratinocyte Overexpression from PMID: 30772301 | SOX2 |
| 6382 PARN     | SOX2 regulated genes in Keratinocyte Overexpression from PMID: 30772301 | SOX2 |
| 6383 SCUBE3   | SOX2 regulated genes in Keratinocyte Overexpression from PMID: 30772301 | SOX2 |
| 6384 RALGAPA1 | SOX2 regulated genes in Keratinocyte Overexpression from PMID: 30772301 | SOX2 |
| 6385 TIMM10   | SOX2 regulated genes in Keratinocyte Overexpression from PMID: 30772301 | SOX2 |
| 6386 ANAPC10  | SOX2 regulated genes in Keratinocyte Overexpression from PMID: 30772301 | SOX2 |
| 6387 CXXC5    | SOX2 regulated genes in Keratinocyte Overexpression from PMID: 30772301 | SOX2 |
| 6388 CTCF     | SOX2 regulated genes in Keratinocyte Overexpression from PMID: 30772301 | SOX2 |
| 6389 EEF1A1   | SOX2 regulated genes in Keratinocyte Overexpression from PMID: 30772301 | SOX2 |
| 6390 UACA     | SOX2 regulated genes in Keratinocyte Overexpression from PMID: 30772301 | SOX2 |
| 6391 FAF2     | SOX2 regulated genes in Keratinocyte Overexpression from PMID: 30772301 | SOX2 |
| 6392 SUB1     | SOX2 regulated genes in Keratinocyte Overexpression from PMID: 30772301 | SOX2 |
| 6393 SCNN1B   | SOX2 regulated genes in Keratinocyte Overexpression from PMID: 30772301 | SOX2 |
| 6394 WAC      | SOX2 regulated genes in Keratinocyte Overexpression from PMID: 30772301 | SOX2 |
| 6395 SNUPN    | SOX2 regulated genes in Keratinocyte Overexpression from PMID: 30772301 | SOX2 |
| 6396 USP34    | SOX2 regulated genes in Keratinocyte Overexpression from PMID: 30772301 | SOX2 |
| 6397 SKIDA1   | SOX2 regulated genes in Keratinocyte Overexpression from PMID: 30772301 | SOX2 |
| 6398 BICD1    | SOX2 regulated genes in Keratinocyte Overexpression from PMID: 30772301 | SOX2 |
| 6399 TOB1     | SOX2 regulated genes in Keratinocyte Overexpression from PMID: 30772301 | SOX2 |
| 6400 TANGO6   | SOX2 regulated genes in Keratinocyte Overexpression from PMID: 30772301 | SOX2 |
| 6401 BAALC    | SOX2 regulated genes in Keratinocyte Overexpression from PMID: 30772301 | SOX2 |
| 6402 FOXK2    | SOX2 regulated genes in Keratinocyte Overexpression from PMID: 30772301 | SOX2 |
| 6403 FOXA3    | SOX2 regulated genes in Keratinocyte Overexpression from PMID: 30772301 | SOX2 |

|               |                                                                         |      |
|---------------|-------------------------------------------------------------------------|------|
| 6404 MKRN1    | SOX2 regulated genes in Keratinocyte Overexpression from PMID: 30772301 | SOX2 |
| 6405 GRM7     | SOX2 regulated genes in Keratinocyte Overexpression from PMID: 30772301 | SOX2 |
| 6406 PHPT1    | SOX2 regulated genes in Keratinocyte Overexpression from PMID: 30772301 | SOX2 |
| 6407 CPEB2    | SOX2 regulated genes in Keratinocyte Overexpression from PMID: 30772301 | SOX2 |
| 6408 YWHAZ    | SOX2 regulated genes in Keratinocyte Overexpression from PMID: 30772301 | SOX2 |
| 6409 RPP25L   | SOX2 regulated genes in Keratinocyte Overexpression from PMID: 30772301 | SOX2 |
| 6410 TMEM11   | SOX2 regulated genes in Keratinocyte Overexpression from PMID: 30772301 | SOX2 |
| 6411 MRPL11   | SOX2 regulated genes in Keratinocyte Overexpression from PMID: 30772301 | SOX2 |
| 6412 ZNF276   | SOX2 regulated genes in Keratinocyte Overexpression from PMID: 30772301 | SOX2 |
| 6413 RALA     | SOX2 regulated genes in Keratinocyte Overexpression from PMID: 30772301 | SOX2 |
| 6414 NUP188   | SOX2 regulated genes in Keratinocyte Overexpression from PMID: 30772301 | SOX2 |
| 6415 PTPRF    | SOX2 regulated genes in Keratinocyte Overexpression from PMID: 30772301 | SOX2 |
| 6416 MEST     | SOX2 regulated genes in Keratinocyte Overexpression from PMID: 30772301 | SOX2 |
| 6417 POLD4    | SOX2 regulated genes in Keratinocyte Overexpression from PMID: 30772301 | SOX2 |
| 6418 SLITRK5  | SOX2 regulated genes in Keratinocyte Overexpression from PMID: 30772301 | SOX2 |
| 6419 N4BP2L2  | SOX2 regulated genes in Keratinocyte Overexpression from PMID: 30772301 | SOX2 |
| 6420 ACP7     | SOX2 regulated genes in Keratinocyte Overexpression from PMID: 30772301 | SOX2 |
| 6421 HBP1     | SOX2 regulated genes in Keratinocyte Overexpression from PMID: 30772301 | SOX2 |
| 6422 LRRTM2   | SOX2 regulated genes in Keratinocyte Overexpression from PMID: 30772301 | SOX2 |
| 6423 RRN3     | SOX2 regulated genes in Keratinocyte Overexpression from PMID: 30772301 | SOX2 |
| 6424 HEPH     | SOX2 regulated genes in Keratinocyte Overexpression from PMID: 30772301 | SOX2 |
| 6425 MOB1B    | SOX2 regulated genes in Keratinocyte Overexpression from PMID: 30772301 | SOX2 |
| 6426 BRCC3    | SOX2 regulated genes in Keratinocyte Overexpression from PMID: 30772301 | SOX2 |
| 6427 OPA3     | SOX2 regulated genes in Keratinocyte Overexpression from PMID: 30772301 | SOX2 |
| 6428 UBA1     | SOX2 regulated genes in Keratinocyte Overexpression from PMID: 30772301 | SOX2 |
| 6429 FBXO10   | SOX2 regulated genes in Keratinocyte Overexpression from PMID: 30772301 | SOX2 |
| 6430 MPZL3    | SOX2 regulated genes in Keratinocyte Overexpression from PMID: 30772301 | SOX2 |
| 6431 ORMDL2   | SOX2 regulated genes in Keratinocyte Overexpression from PMID: 30772301 | SOX2 |
| 6432 PRR3     | SOX2 regulated genes in Keratinocyte Overexpression from PMID: 30772301 | SOX2 |
| 6433 TSPAN3   | SOX2 regulated genes in Keratinocyte Overexpression from PMID: 30772301 | SOX2 |
| 6434 CBLN3    | SOX2 regulated genes in Keratinocyte Overexpression from PMID: 30772301 | SOX2 |
| 6435 LETM1    | SOX2 regulated genes in Keratinocyte Overexpression from PMID: 30772301 | SOX2 |
| 6436 RC3H2    | SOX2 regulated genes in Keratinocyte Overexpression from PMID: 30772301 | SOX2 |
| 6437 CX3CL1   | SOX2 regulated genes in Keratinocyte Overexpression from PMID: 30772301 | SOX2 |
| 6438 FLRT2    | SOX2 regulated genes in Keratinocyte Overexpression from PMID: 30772301 | SOX2 |
| 6439 GEN1     | SOX2 regulated genes in Keratinocyte Overexpression from PMID: 30772301 | SOX2 |
| 6440 BCL11A   | SOX2 regulated genes in Keratinocyte Overexpression from PMID: 30772301 | SOX2 |
| 6441 TMEM178A | SOX2 regulated genes in Keratinocyte Overexpression from PMID: 30772301 | SOX2 |
| 6442 EXOSC7   | SOX2 regulated genes in Keratinocyte Overexpression from PMID: 30772301 | SOX2 |
| 6443 LBH      | SOX2 regulated genes in Keratinocyte Overexpression from PMID: 30772301 | SOX2 |
| 6444 COPS7A   | SOX2 regulated genes in Keratinocyte Overexpression from PMID: 30772301 | SOX2 |
| 6445 RBMX2    | SOX2 regulated genes in Keratinocyte Overexpression from PMID: 30772301 | SOX2 |
| 6446 NRBP2    | SOX2 regulated genes in Keratinocyte Overexpression from PMID: 30772301 | SOX2 |
| 6447 KLRG2    | SOX2 regulated genes in Keratinocyte Overexpression from PMID: 30772301 | SOX2 |
| 6448 DPH3     | SOX2 regulated genes in Keratinocyte Overexpression from PMID: 30772301 | SOX2 |
| 6449 VPS37D   | SOX2 regulated genes in Keratinocyte Overexpression from PMID: 30772301 | SOX2 |
| 6450 PLG      | SOX2 regulated genes in Keratinocyte Overexpression from PMID: 30772301 | SOX2 |
| 6451 C1QTNF4  | SOX2 regulated genes in Keratinocyte Overexpression from PMID: 30772301 | SOX2 |
| 6452 CSRP2    | SOX2 regulated genes in Keratinocyte Overexpression from PMID: 30772301 | SOX2 |
| 6453 EFCAB7   | SOX2 regulated genes in Keratinocyte Overexpression from PMID: 30772301 | SOX2 |
| 6454 TEAD2    | SOX2 regulated genes in Keratinocyte Overexpression from PMID: 30772301 | SOX2 |
| 6455 HERC4    | SOX2 regulated genes in Keratinocyte Overexpression from PMID: 30772301 | SOX2 |
| 6456 GLRX3    | SOX2 regulated genes in Keratinocyte Overexpression from PMID: 30772301 | SOX2 |
| 6457 SLC16A8  | SOX2 regulated genes in Keratinocyte Overexpression from PMID: 30772301 | SOX2 |
| 6458 NFIB     | SOX2 regulated genes in Keratinocyte Overexpression from PMID: 30772301 | SOX2 |
| 6459 NUP35    | SOX2 regulated genes in Keratinocyte Overexpression from PMID: 30772301 | SOX2 |
| 6460 PPARD    | SOX2 regulated genes in Keratinocyte Overexpression from PMID: 30772301 | SOX2 |
| 6461 GLA      | SOX2 regulated genes in Keratinocyte Overexpression from PMID: 30772301 | SOX2 |
| 6462 SRSF12   | SOX2 regulated genes in Keratinocyte Overexpression from PMID: 30772301 | SOX2 |
| 6463 COPS6    | SOX2 regulated genes in Keratinocyte Overexpression from PMID: 30772301 | SOX2 |
| 6464 SH3D19   | SOX2 regulated genes in Keratinocyte Overexpression from PMID: 30772301 | SOX2 |

|                |                                                                         |      |
|----------------|-------------------------------------------------------------------------|------|
| 6465 SYCP3     | SOX2 regulated genes in Keratinocyte Overexpression from PMID: 30772301 | SOX2 |
| 6466 GZF1      | SOX2 regulated genes in Keratinocyte Overexpression from PMID: 30772301 | SOX2 |
| 6467 AGAP3     | SOX2 regulated genes in Keratinocyte Overexpression from PMID: 30772301 | SOX2 |
| 6468 JAG2      | SOX2 regulated genes in Keratinocyte Overexpression from PMID: 30772301 | SOX2 |
| 6469 TLE4      | SOX2 regulated genes in Keratinocyte Overexpression from PMID: 30772301 | SOX2 |
| 6470 SNX33     | SOX2 regulated genes in Keratinocyte Overexpression from PMID: 30772301 | SOX2 |
| 6471 ALKBH4    | SOX2 regulated genes in Keratinocyte Overexpression from PMID: 30772301 | SOX2 |
| 6472 GPC4      | SOX2 regulated genes in Keratinocyte Overexpression from PMID: 30772301 | SOX2 |
| 6473 BRAP      | SOX2 regulated genes in Keratinocyte Overexpression from PMID: 30772301 | SOX2 |
| 6474 HS6ST1    | SOX2 regulated genes in Keratinocyte Overexpression from PMID: 30772301 | SOX2 |
| 6475 MPHOSPH10 | SOX2 regulated genes in Keratinocyte Overexpression from PMID: 30772301 | SOX2 |
| 6476 KIAA0586  | SOX2 regulated genes in Keratinocyte Overexpression from PMID: 30772301 | SOX2 |
| 6477 HSF1      | SOX2 regulated genes in Keratinocyte Overexpression from PMID: 30772301 | SOX2 |
| 6478 DPYSL5    | SOX2 regulated genes in Keratinocyte Overexpression from PMID: 30772301 | SOX2 |
| 6479 ADO       | SOX2 regulated genes in Keratinocyte Overexpression from PMID: 30772301 | SOX2 |
| 6480 PDIK1L    | SOX2 regulated genes in Keratinocyte Overexpression from PMID: 30772301 | SOX2 |
| 6481 PPPIA3    | SOX2 regulated genes in Keratinocyte Overexpression from PMID: 30772301 | SOX2 |
| 6482 TSSK1B    | SOX2 regulated genes in Keratinocyte Overexpression from PMID: 30772301 | SOX2 |
| 6483 DUSP6     | SOX2 regulated genes in Keratinocyte Overexpression from PMID: 30772301 | SOX2 |
| 6484 PPIL4     | SOX2 regulated genes in Keratinocyte Overexpression from PMID: 30772301 | SOX2 |
| 6485 SMNDC1    | SOX2 regulated genes in Keratinocyte Overexpression from PMID: 30772301 | SOX2 |
| 6486 SOSTDC1   | SOX2 regulated genes in Keratinocyte Overexpression from PMID: 30772301 | SOX2 |
| 6487 NUP98     | SOX2 regulated genes in Keratinocyte Overexpression from PMID: 30772301 | SOX2 |
| 6488 TMEM121   | SOX2 regulated genes in Keratinocyte Overexpression from PMID: 30772301 | SOX2 |
| 6489 GJB4      | SOX2 regulated genes in Keratinocyte Overexpression from PMID: 30772301 | SOX2 |
| 6490 RPL37     | SOX2 regulated genes in Keratinocyte Overexpression from PMID: 30772301 | SOX2 |
| 6491 MAP9      | SOX2 regulated genes in Keratinocyte Overexpression from PMID: 30772301 | SOX2 |
| 6492 MTPP      | SOX2 regulated genes in Keratinocyte Overexpression from PMID: 30772301 | SOX2 |
| 6493 IQCK      | SOX2 regulated genes in Keratinocyte Overexpression from PMID: 30772301 | SOX2 |
| 6494 PPP2R5D   | SOX2 regulated genes in Keratinocyte Overexpression from PMID: 30772301 | SOX2 |
| 6495 NUP37     | SOX2 regulated genes in Keratinocyte Overexpression from PMID: 30772301 | SOX2 |
| 6496 MLLT10    | SOX2 regulated genes in Keratinocyte Overexpression from PMID: 30772301 | SOX2 |
| 6497 FNTB      | SOX2 regulated genes in Keratinocyte Overexpression from PMID: 30772301 | SOX2 |
| 6498 PPP1R15A  | SOX2 regulated genes in Keratinocyte Overexpression from PMID: 30772301 | SOX2 |
| 6499 PNPLA1    | SOX2 regulated genes in Keratinocyte Overexpression from PMID: 30772301 | SOX2 |
| 6500 RPL22L1   | SOX2 regulated genes in Keratinocyte Overexpression from PMID: 30772301 | SOX2 |
| 6501 NRN1L     | SOX2 regulated genes in Keratinocyte Overexpression from PMID: 30772301 | SOX2 |
| 6502 EEFSEC    | SOX2 regulated genes in Keratinocyte Overexpression from PMID: 30772301 | SOX2 |
| 6503 PPIID     | SOX2 regulated genes in Keratinocyte Overexpression from PMID: 30772301 | SOX2 |
| 6504 ARMC10    | SOX2 regulated genes in Keratinocyte Overexpression from PMID: 30772301 | SOX2 |
| 6505 ZBTB45    | SOX2 regulated genes in Keratinocyte Overexpression from PMID: 30772301 | SOX2 |
| 6506 NXPE2     | SOX2 regulated genes in Keratinocyte Overexpression from PMID: 30772301 | SOX2 |
| 6507 PSMD14    | SOX2 regulated genes in Keratinocyte Overexpression from PMID: 30772301 | SOX2 |
| 6508 KIF20B    | SOX2 regulated genes in Keratinocyte Overexpression from PMID: 30772301 | SOX2 |
| 6509 TMEM161A  | SOX2 regulated genes in Keratinocyte Overexpression from PMID: 30772301 | SOX2 |
| 6510 CCDC112   | SOX2 regulated genes in Keratinocyte Overexpression from PMID: 30772301 | SOX2 |
| 6511 PRRG3     | SOX2 regulated genes in Keratinocyte Overexpression from PMID: 30772301 | SOX2 |
| 6512 PUS3      | SOX2 regulated genes in Keratinocyte Overexpression from PMID: 30772301 | SOX2 |
| 6513 SYNE2     | SOX2 regulated genes in Keratinocyte Overexpression from PMID: 30772301 | SOX2 |
| 6514 ZBTB12    | SOX2 regulated genes in Keratinocyte Overexpression from PMID: 30772301 | SOX2 |
| 6515 REXO4     | SOX2 regulated genes in Keratinocyte Overexpression from PMID: 30772301 | SOX2 |
| 6516 WDR31     | SOX2 regulated genes in Keratinocyte Overexpression from PMID: 30772301 | SOX2 |
| 6517 AP1S3     | SOX2 regulated genes in Keratinocyte Overexpression from PMID: 30772301 | SOX2 |
| 6518 GTF3C5    | SOX2 regulated genes in Keratinocyte Overexpression from PMID: 30772301 | SOX2 |
| 6519 PTK2      | SOX2 regulated genes in Keratinocyte Overexpression from PMID: 30772301 | SOX2 |
| 6520 LRFN1     | SOX2 regulated genes in Keratinocyte Overexpression from PMID: 30772301 | SOX2 |
| 6521 CCNC      | SOX2 regulated genes in Keratinocyte Overexpression from PMID: 30772301 | SOX2 |
| 6522 PLA2G12A  | SOX2 regulated genes in Keratinocyte Overexpression from PMID: 30772301 | SOX2 |
| 6523 ARID1B    | SOX2 regulated genes in Keratinocyte Overexpression from PMID: 30772301 | SOX2 |
| 6524 SOCS5     | SOX2 regulated genes in Keratinocyte Overexpression from PMID: 30772301 | SOX2 |
| 6525 FANCA     | SOX2 regulated genes in Keratinocyte Overexpression from PMID: 30772301 | SOX2 |

|                |                                                                         |      |
|----------------|-------------------------------------------------------------------------|------|
| 6526 NAXD      | SOX2 regulated genes in Keratinocyte Overexpression from PMID: 30772301 | SOX2 |
| 6527 CLIC3     | SOX2 regulated genes in Keratinocyte Overexpression from PMID: 30772301 | SOX2 |
| 6528 ABHD10    | SOX2 regulated genes in Keratinocyte Overexpression from PMID: 30772301 | SOX2 |
| 6529 INSM2     | SOX2 regulated genes in Keratinocyte Overexpression from PMID: 30772301 | SOX2 |
| 6530 MYCBPAP   | SOX2 regulated genes in Keratinocyte Overexpression from PMID: 30772301 | SOX2 |
| 6531 TEAD3     | SOX2 regulated genes in Keratinocyte Overexpression from PMID: 30772301 | SOX2 |
| 6532 PTK2B     | SOX2 regulated genes in Keratinocyte Overexpression from PMID: 30772301 | SOX2 |
| 6533 TCF7L1    | SOX2 regulated genes in Keratinocyte Overexpression from PMID: 30772301 | SOX2 |
| 6534 CBX1      | SOX2 regulated genes in Keratinocyte Overexpression from PMID: 30772301 | SOX2 |
| 6535 MDGA1     | SOX2 regulated genes in Keratinocyte Overexpression from PMID: 30772301 | SOX2 |
| 6536 CLDND1    | SOX2 regulated genes in Keratinocyte Overexpression from PMID: 30772301 | SOX2 |
| 6537 CENPH     | SOX2 regulated genes in Keratinocyte Overexpression from PMID: 30772301 | SOX2 |
| 6538 PLEKHF2   | SOX2 regulated genes in Keratinocyte Overexpression from PMID: 30772301 | SOX2 |
| 6539 DNAJB13   | SOX2 regulated genes in Keratinocyte Overexpression from PMID: 30772301 | SOX2 |
| 6540 LUC7L3    | SOX2 regulated genes in Keratinocyte Overexpression from PMID: 30772301 | SOX2 |
| 6541 ARHGEF1   | SOX2 regulated genes in Keratinocyte Overexpression from PMID: 30772301 | SOX2 |
| 6542 PLOD2     | SOX2 regulated genes in Keratinocyte Overexpression from PMID: 30772301 | SOX2 |
| 6543 NPRL2     | SOX2 regulated genes in Keratinocyte Overexpression from PMID: 30772301 | SOX2 |
| 6544 METTL2B   | SOX2 regulated genes in Keratinocyte Overexpression from PMID: 30772301 | SOX2 |
| 6545 TUBE1     | SOX2 regulated genes in Keratinocyte Overexpression from PMID: 30772301 | SOX2 |
| 6546 C1QTNF12  | SOX2 regulated genes in Keratinocyte Overexpression from PMID: 30772301 | SOX2 |
| 6547 BORCS8    | SOX2 regulated genes in Keratinocyte Overexpression from PMID: 30772301 | SOX2 |
| 6548 SLCO4C1   | SOX2 regulated genes in Keratinocyte Overexpression from PMID: 30772301 | SOX2 |
| 6549 LIG4      | SOX2 regulated genes in Keratinocyte Overexpression from PMID: 30772301 | SOX2 |
| 6550 MEPCE     | SOX2 regulated genes in Keratinocyte Overexpression from PMID: 30772301 | SOX2 |
| 6551 CYFIP2    | SOX2 regulated genes in Keratinocyte Overexpression from PMID: 30772301 | SOX2 |
| 6552 CD151     | SOX2 regulated genes in Keratinocyte Overexpression from PMID: 30772301 | SOX2 |
| 6553 LYRM4     | SOX2 regulated genes in Keratinocyte Overexpression from PMID: 30772301 | SOX2 |
| 6554 TP53I11   | SOX2 regulated genes in Keratinocyte Overexpression from PMID: 30772301 | SOX2 |
| 6555 CTBP1     | SOX2 regulated genes in Keratinocyte Overexpression from PMID: 30772301 | SOX2 |
| 6556 ARL6      | SOX2 regulated genes in Keratinocyte Overexpression from PMID: 30772301 | SOX2 |
| 6557 LRWD1     | SOX2 regulated genes in Keratinocyte Overexpression from PMID: 30772301 | SOX2 |
| 6558 HDHD3     | SOX2 regulated genes in Keratinocyte Overexpression from PMID: 30772301 | SOX2 |
| 6559 ZC3HAV1L  | SOX2 regulated genes in Keratinocyte Overexpression from PMID: 30772301 | SOX2 |
| 6560 STAM      | SOX2 regulated genes in Keratinocyte Overexpression from PMID: 30772301 | SOX2 |
| 6561 URI1      | SOX2 regulated genes in Keratinocyte Overexpression from PMID: 30772301 | SOX2 |
| 6562 MRPL2     | SOX2 regulated genes in Keratinocyte Overexpression from PMID: 30772301 | SOX2 |
| 6563 GABARAPL2 | SOX2 regulated genes in Keratinocyte Overexpression from PMID: 30772301 | SOX2 |
| 6564 RARG      | SOX2 regulated genes in Keratinocyte Overexpression from PMID: 30772301 | SOX2 |
| 6565 NXF1      | SOX2 regulated genes in Keratinocyte Overexpression from PMID: 30772301 | SOX2 |
| 6566 VWA7      | SOX2 regulated genes in Keratinocyte Overexpression from PMID: 30772301 | SOX2 |
| 6567 BBS12     | SOX2 regulated genes in Keratinocyte Overexpression from PMID: 30772301 | SOX2 |
| 6568 SESN2     | SOX2 regulated genes in Keratinocyte Overexpression from PMID: 30772301 | SOX2 |
| 6569 PYURF     | SOX2 regulated genes in Keratinocyte Overexpression from PMID: 30772301 | SOX2 |
| 6570 FAM166A   | SOX2 regulated genes in Keratinocyte Overexpression from PMID: 30772301 | SOX2 |
| 6571 GLB1L2    | SOX2 regulated genes in Keratinocyte Overexpression from PMID: 30772301 | SOX2 |
| 6572 PSMC2     | SOX2 regulated genes in Keratinocyte Overexpression from PMID: 30772301 | SOX2 |
| 6573 NSMCE4A   | SOX2 regulated genes in Keratinocyte Overexpression from PMID: 30772301 | SOX2 |
| 6574 CLUAP1    | SOX2 regulated genes in Keratinocyte Overexpression from PMID: 30772301 | SOX2 |
| 6575 JMJD7     | SOX2 regulated genes in Keratinocyte Overexpression from PMID: 30772301 | SOX2 |
| 6576 CDC42BPG  | SOX2 regulated genes in Keratinocyte Overexpression from PMID: 30772301 | SOX2 |
| 6577 MEA1      | SOX2 regulated genes in Keratinocyte Overexpression from PMID: 30772301 | SOX2 |
| 6578 CDK17     | SOX2 regulated genes in Keratinocyte Overexpression from PMID: 30772301 | SOX2 |
| 6579 ATAD5     | SOX2 regulated genes in Keratinocyte Overexpression from PMID: 30772301 | SOX2 |
| 6580 DDX19B    | SOX2 regulated genes in Keratinocyte Overexpression from PMID: 30772301 | SOX2 |
| 6581 CCDC189   | SOX2 regulated genes in Keratinocyte Overexpression from PMID: 30772301 | SOX2 |
| 6582 ADAMTS13  | SOX2 regulated genes in Keratinocyte Overexpression from PMID: 30772301 | SOX2 |
| 6583 EMC4      | SOX2 regulated genes in Keratinocyte Overexpression from PMID: 30772301 | SOX2 |
| 6584 ZNF597    | SOX2 regulated genes in Keratinocyte Overexpression from PMID: 30772301 | SOX2 |
| 6585 CEP131    | SOX2 regulated genes in Keratinocyte Overexpression from PMID: 30772301 | SOX2 |
| 6586 KLHL2     | SOX2 regulated genes in Keratinocyte Overexpression from PMID: 30772301 | SOX2 |

|               |                                                                         |      |
|---------------|-------------------------------------------------------------------------|------|
| 6587 FRA10AC1 | SOX2 regulated genes in Keratinocyte Overexpression from PMID: 30772301 | SOX2 |
| 6588 RPS6KA3  | SOX2 regulated genes in Keratinocyte Overexpression from PMID: 30772301 | SOX2 |
| 6589 PSMA3    | SOX2 regulated genes in Keratinocyte Overexpression from PMID: 30772301 | SOX2 |
| 6590 CDC26    | SOX2 regulated genes in Keratinocyte Overexpression from PMID: 30772301 | SOX2 |
| 6591 SPSB3    | SOX2 regulated genes in Keratinocyte Overexpression from PMID: 30772301 | SOX2 |
| 6592 GPATCH1  | SOX2 regulated genes in Keratinocyte Overexpression from PMID: 30772301 | SOX2 |
| 6593 TPO      | SOX2 regulated genes in Keratinocyte Overexpression from PMID: 30772301 | SOX2 |
| 6594 RUFY3    | SOX2 regulated genes in Keratinocyte Overexpression from PMID: 30772301 | SOX2 |
| 6595 PRPF4    | SOX2 regulated genes in Keratinocyte Overexpression from PMID: 30772301 | SOX2 |
| 6596 STRN     | SOX2 regulated genes in Keratinocyte Overexpression from PMID: 30772301 | SOX2 |
| 6597 LMNTD2   | SOX2 regulated genes in Keratinocyte Overexpression from PMID: 30772301 | SOX2 |
| 6598 NCAPG2   | SOX2 regulated genes in Keratinocyte Overexpression from PMID: 30772301 | SOX2 |
| 6599 CEP170B  | SOX2 regulated genes in Keratinocyte Overexpression from PMID: 30772301 | SOX2 |
| 6600 XPO5     | SOX2 regulated genes in Keratinocyte Overexpression from PMID: 30772301 | SOX2 |
| 6601 BOK      | SOX2 regulated genes in Keratinocyte Overexpression from PMID: 30772301 | SOX2 |
| 6602 UTP20    | SOX2 regulated genes in Keratinocyte Overexpression from PMID: 30772301 | SOX2 |
| 6603 CRYBB3   | SOX2 regulated genes in Keratinocyte Overexpression from PMID: 30772301 | SOX2 |
| 6604 ARF5     | SOX2 regulated genes in Keratinocyte Overexpression from PMID: 30772301 | SOX2 |
| 6605 CTSF     | SOX2 regulated genes in Keratinocyte Overexpression from PMID: 30772301 | SOX2 |
| 6606 AVEN     | SOX2 regulated genes in Keratinocyte Overexpression from PMID: 30772301 | SOX2 |
| 6607 SFTPD    | SOX2 regulated genes in Keratinocyte Overexpression from PMID: 30772301 | SOX2 |
| 6608 GNMT     | SOX2 regulated genes in Keratinocyte Overexpression from PMID: 30772301 | SOX2 |
| 6609 ZMYND8   | SOX2 regulated genes in Keratinocyte Overexpression from PMID: 30772301 | SOX2 |
| 6610 TRIM32   | SOX2 regulated genes in Keratinocyte Overexpression from PMID: 30772301 | SOX2 |
| 6611 CENPK    | SOX2 regulated genes in Keratinocyte Overexpression from PMID: 30772301 | SOX2 |
| 6612 ZSCAN22  | SOX2 regulated genes in Keratinocyte Overexpression from PMID: 30772301 | SOX2 |
| 6613 C3orf18  | SOX2 regulated genes in Keratinocyte Overexpression from PMID: 30772301 | SOX2 |
| 6614 AGO2     | SOX2 regulated genes in Keratinocyte Overexpression from PMID: 30772301 | SOX2 |
| 6615 NPHP4    | SOX2 regulated genes in Keratinocyte Overexpression from PMID: 30772301 | SOX2 |
| 6616 IRX6     | SOX2 regulated genes in Keratinocyte Overexpression from PMID: 30772301 | SOX2 |
| 6617 MRPS10   | SOX2 regulated genes in Keratinocyte Overexpression from PMID: 30772301 | SOX2 |
| 6618 OIP5     | SOX2 regulated genes in Keratinocyte Overexpression from PMID: 30772301 | SOX2 |
| 6619 CEP55    | SOX2 regulated genes in Keratinocyte Overexpression from PMID: 30772301 | SOX2 |
| 6620 GAPVD1   | SOX2 regulated genes in Keratinocyte Overexpression from PMID: 30772301 | SOX2 |
| 6621 GPC1     | SOX2 regulated genes in Keratinocyte Overexpression from PMID: 30772301 | SOX2 |
| 6622 SSC4D    | SOX2 regulated genes in Keratinocyte Overexpression from PMID: 30772301 | SOX2 |
| 6623 UBE2N    | SOX2 regulated genes in Keratinocyte Overexpression from PMID: 30772301 | SOX2 |
| 6624 UBN1     | SOX2 regulated genes in Keratinocyte Overexpression from PMID: 30772301 | SOX2 |
| 6625 CDC40    | SOX2 regulated genes in Keratinocyte Overexpression from PMID: 30772301 | SOX2 |
| 6626 YPEL5    | SOX2 regulated genes in Keratinocyte Overexpression from PMID: 30772301 | SOX2 |
| 6627 NEK4     | SOX2 regulated genes in Keratinocyte Overexpression from PMID: 30772301 | SOX2 |
| 6628 TIMM9    | SOX2 regulated genes in Keratinocyte Overexpression from PMID: 30772301 | SOX2 |
| 6629 TRIM9    | SOX2 regulated genes in Keratinocyte Overexpression from PMID: 30772301 | SOX2 |
| 6630 DDX31    | SOX2 regulated genes in Keratinocyte Overexpression from PMID: 30772301 | SOX2 |
| 6631 MYH9     | SOX2 regulated genes in Keratinocyte Overexpression from PMID: 30772301 | SOX2 |
| 6632 TTPA     | SOX2 regulated genes in Keratinocyte Overexpression from PMID: 30772301 | SOX2 |
| 6633 PARG     | SOX2 regulated genes in Keratinocyte Overexpression from PMID: 30772301 | SOX2 |
| 6634 OTOA     | SOX2 regulated genes in Keratinocyte Overexpression from PMID: 30772301 | SOX2 |
| 6635 RGS9     | SOX2 regulated genes in Keratinocyte Overexpression from PMID: 30772301 | SOX2 |
| 6636 MYRFL    | SOX2 regulated genes in Keratinocyte Overexpression from PMID: 30772301 | SOX2 |
| 6637 SALL2    | SOX2 regulated genes in Keratinocyte Overexpression from PMID: 30772301 | SOX2 |
| 6638 TTL7     | SOX2 regulated genes in Keratinocyte Overexpression from PMID: 30772301 | SOX2 |
| 6639 POU5F2   | SOX2 regulated genes in Keratinocyte Overexpression from PMID: 30772301 | SOX2 |
| 6640 NDUFAF4  | SOX2 regulated genes in Keratinocyte Overexpression from PMID: 30772301 | SOX2 |
| 6641 IGF1R    | SOX2 regulated genes in Keratinocyte Overexpression from PMID: 30772301 | SOX2 |
| 6642 VASN     | SOX2 regulated genes in Keratinocyte Overexpression from PMID: 30772301 | SOX2 |
| 6643 CASKIN1  | SOX2 regulated genes in Keratinocyte Overexpression from PMID: 30772301 | SOX2 |
| 6644 HERPUD2  | SOX2 regulated genes in Keratinocyte Overexpression from PMID: 30772301 | SOX2 |
| 6645 OXCT2    | SOX2 regulated genes in Keratinocyte Overexpression from PMID: 30772301 | SOX2 |
| 6646 SLC4A10  | SOX2 regulated genes in Keratinocyte Overexpression from PMID: 30772301 | SOX2 |
| 6647 APPL2    | SOX2 regulated genes in Keratinocyte Overexpression from PMID: 30772301 | SOX2 |

|               |                                                                         |      |
|---------------|-------------------------------------------------------------------------|------|
| 6648 OMD      | SOX2 regulated genes in Keratinocyte Overexpression from PMID: 30772301 | SOX2 |
| 6649 WNK3     | SOX2 regulated genes in Keratinocyte Overexpression from PMID: 30772301 | SOX2 |
| 6650 SNX18    | SOX2 regulated genes in Keratinocyte Overexpression from PMID: 30772301 | SOX2 |
| 6651 DPM2     | SOX2 regulated genes in Keratinocyte Overexpression from PMID: 30772301 | SOX2 |
| 6652 KIAA1191 | SOX2 regulated genes in Keratinocyte Overexpression from PMID: 30772301 | SOX2 |
| 6653 RFC2     | SOX2 regulated genes in Keratinocyte Overexpression from PMID: 30772301 | SOX2 |
| 6654 BTG1     | SOX2 regulated genes in Keratinocyte Overexpression from PMID: 30772301 | SOX2 |
| 6655 ATP11A   | SOX2 regulated genes in Keratinocyte Overexpression from PMID: 30772301 | SOX2 |
| 6656 MPLKIP   | SOX2 regulated genes in Keratinocyte Overexpression from PMID: 30772301 | SOX2 |
| 6657 SPNS1    | SOX2 regulated genes in Keratinocyte Overexpression from PMID: 30772301 | SOX2 |
| 6658 SAP18    | SOX2 regulated genes in Keratinocyte Overexpression from PMID: 30772301 | SOX2 |
| 6659 JRK      | SOX2 regulated genes in Keratinocyte Overexpression from PMID: 30772301 | SOX2 |
| 6660 CAPN13   | SOX2 regulated genes in Keratinocyte Overexpression from PMID: 30772301 | SOX2 |
| 6661 EIF4G2   | SOX2 regulated genes in Keratinocyte Overexpression from PMID: 30772301 | SOX2 |
| 6662 RNFT1    | SOX2 regulated genes in Keratinocyte Overexpression from PMID: 30772301 | SOX2 |
| 6663 COQ7     | SOX2 regulated genes in Keratinocyte Overexpression from PMID: 30772301 | SOX2 |
| 6664 DNAAF2   | SOX2 regulated genes in Keratinocyte Overexpression from PMID: 30772301 | SOX2 |
| 6665 BRIX1    | SOX2 regulated genes in Keratinocyte Overexpression from PMID: 30772301 | SOX2 |
| 6666 PAF1     | SOX2 regulated genes in Keratinocyte Overexpression from PMID: 30772301 | SOX2 |
| 6667 BFSP2    | SOX2 regulated genes in Keratinocyte Overexpression from PMID: 30772301 | SOX2 |
| 6668 PPP1R36  | SOX2 regulated genes in Keratinocyte Overexpression from PMID: 30772301 | SOX2 |
| 6669 ARMC1    | SOX2 regulated genes in Keratinocyte Overexpression from PMID: 30772301 | SOX2 |
| 6670 C11orf52 | SOX2 regulated genes in Keratinocyte Overexpression from PMID: 30772301 | SOX2 |
| 6671 CEMIP    | SOX2 regulated genes in Keratinocyte Overexpression from PMID: 30772301 | SOX2 |
| 6672 CPEB4    | SOX2 regulated genes in Keratinocyte Overexpression from PMID: 30772301 | SOX2 |
| 6673 ZNF593   | SOX2 regulated genes in Keratinocyte Overexpression from PMID: 30772301 | SOX2 |
| 6674 PRSS8    | SOX2 regulated genes in Keratinocyte Overexpression from PMID: 30772301 | SOX2 |
| 6675 HDAC11   | SOX2 regulated genes in Keratinocyte Overexpression from PMID: 30772301 | SOX2 |
| 6676 PHF14    | SOX2 regulated genes in Keratinocyte Overexpression from PMID: 30772301 | SOX2 |
| 6677 CETN2    | SOX2 regulated genes in Keratinocyte Overexpression from PMID: 30772301 | SOX2 |
| 6678 TBRG1    | SOX2 regulated genes in Keratinocyte Overexpression from PMID: 30772301 | SOX2 |
| 6679 ERCC3    | SOX2 regulated genes in Keratinocyte Overexpression from PMID: 30772301 | SOX2 |
| 6680 CDK5     | SOX2 regulated genes in Keratinocyte Overexpression from PMID: 30772301 | SOX2 |
| 6681 EYA3     | SOX2 regulated genes in Keratinocyte Overexpression from PMID: 30772301 | SOX2 |
| 6682 CAMTA1   | SOX2 regulated genes in Keratinocyte Overexpression from PMID: 30772301 | SOX2 |
| 6683 POP7     | SOX2 regulated genes in Keratinocyte Overexpression from PMID: 30772301 | SOX2 |
| 6684 HNRNPLL  | SOX2 regulated genes in Keratinocyte Overexpression from PMID: 30772301 | SOX2 |
| 6685 ZFP92    | SOX2 regulated genes in Keratinocyte Overexpression from PMID: 30772301 | SOX2 |
| 6686 TMEM63B  | SOX2 regulated genes in Keratinocyte Overexpression from PMID: 30772301 | SOX2 |
| 6687 ZNF473   | SOX2 regulated genes in Keratinocyte Overexpression from PMID: 30772301 | SOX2 |
| 6688 TNFAIP8  | SOX2 regulated genes in Keratinocyte Overexpression from PMID: 30772301 | SOX2 |
| 6689 NLN      | SOX2 regulated genes in Keratinocyte Overexpression from PMID: 30772301 | SOX2 |
| 6690 CNGA1    | SOX2 regulated genes in Keratinocyte Overexpression from PMID: 30772301 | SOX2 |
| 6691 LDB1     | SOX2 regulated genes in Keratinocyte Overexpression from PMID: 30772301 | SOX2 |
| 6692 UBAP1    | SOX2 regulated genes in Keratinocyte Overexpression from PMID: 30772301 | SOX2 |
| 6693 TFAP4    | SOX2 regulated genes in Keratinocyte Overexpression from PMID: 30772301 | SOX2 |
| 6694 YTHDC1   | SOX2 regulated genes in Keratinocyte Overexpression from PMID: 30772301 | SOX2 |
| 6695 SIAH2    | SOX2 regulated genes in Keratinocyte Overexpression from PMID: 30772301 | SOX2 |
| 6696 PLS3     | SOX2 regulated genes in Keratinocyte Overexpression from PMID: 30772301 | SOX2 |
| 6697 LZTR1    | SOX2 regulated genes in Keratinocyte Overexpression from PMID: 30772301 | SOX2 |
| 6698 ZNF827   | SOX2 regulated genes in Keratinocyte Overexpression from PMID: 30772301 | SOX2 |
| 6699 NAP1L1   | SOX2 regulated genes in Keratinocyte Overexpression from PMID: 30772301 | SOX2 |
| 6700 CRISPLD1 | SOX2 regulated genes in Keratinocyte Overexpression from PMID: 30772301 | SOX2 |
| 6701 EIF3F    | SOX2 regulated genes in Keratinocyte Overexpression from PMID: 30772301 | SOX2 |
| 6702 KIF23    | SOX2 regulated genes in Keratinocyte Overexpression from PMID: 30772301 | SOX2 |
| 6703 RRP36    | SOX2 regulated genes in Keratinocyte Overexpression from PMID: 30772301 | SOX2 |
| 6704 TRIM31   | SOX2 regulated genes in Keratinocyte Overexpression from PMID: 30772301 | SOX2 |
| 6705 TAF6L    | SOX2 regulated genes in Keratinocyte Overexpression from PMID: 30772301 | SOX2 |
| 6706 ITGB6    | SOX2 regulated genes in Keratinocyte Overexpression from PMID: 30772301 | SOX2 |
| 6707 ARMCX5   | SOX2 regulated genes in Keratinocyte Overexpression from PMID: 30772301 | SOX2 |
| 6708 BTBD11   | SOX2 regulated genes in Keratinocyte Overexpression from PMID: 30772301 | SOX2 |



|               |                                                                         |      |
|---------------|-------------------------------------------------------------------------|------|
| 6709 EIF1AD   | SOX2 regulated genes in Keratinocyte Overexpression from PMID: 30772301 | SOX2 |
| 6710 ACRBP    | SOX2 regulated genes in Keratinocyte Overexpression from PMID: 30772301 | SOX2 |
| 6711 METTL3   | SOX2 regulated genes in Keratinocyte Overexpression from PMID: 30772301 | SOX2 |
| 6712 IGF2BP1  | SOX2 regulated genes in Keratinocyte Overexpression from PMID: 30772301 | SOX2 |
| 6713 GPR176   | SOX2 regulated genes in Keratinocyte Overexpression from PMID: 30772301 | SOX2 |
| 6714 PDZD4    | SOX2 regulated genes in Keratinocyte Overexpression from PMID: 30772301 | SOX2 |
| 6715 TRMO     | SOX2 regulated genes in Keratinocyte Overexpression from PMID: 30772301 | SOX2 |
| 6716 KDM4B    | SOX2 regulated genes in Keratinocyte Overexpression from PMID: 30772301 | SOX2 |
| 6717 FAIM2    | SOX2 regulated genes in Keratinocyte Overexpression from PMID: 30772301 | SOX2 |
| 6718 DMGDH    | SOX2 regulated genes in Keratinocyte Overexpression from PMID: 30772301 | SOX2 |
| 6719 ZNF101   | SOX2 regulated genes in Keratinocyte Overexpression from PMID: 30772301 | SOX2 |
| 6720 MT4      | SOX2 regulated genes in Keratinocyte Overexpression from PMID: 30772301 | SOX2 |
| 6721 ATXN2    | SOX2 regulated genes in Keratinocyte Overexpression from PMID: 30772301 | SOX2 |
| 6722 XRCC2    | SOX2 regulated genes in Keratinocyte Overexpression from PMID: 30772301 | SOX2 |
| 6723 CNOT11   | SOX2 regulated genes in Keratinocyte Overexpression from PMID: 30772301 | SOX2 |
| 6724 RAVER2   | SOX2 regulated genes in Keratinocyte Overexpression from PMID: 30772301 | SOX2 |
| 6725 UBE2V2   | SOX2 regulated genes in Keratinocyte Overexpression from PMID: 30772301 | SOX2 |
| 6726 MPHOSPH6 | SOX2 regulated genes in Keratinocyte Overexpression from PMID: 30772301 | SOX2 |
| 6727 THRAP3   | SOX2 regulated genes in Keratinocyte Overexpression from PMID: 30772301 | SOX2 |
| 6728 FAM47E   | SOX2 regulated genes in Keratinocyte Overexpression from PMID: 30772301 | SOX2 |
| 6729 STK39    | SOX2 regulated genes in Keratinocyte Overexpression from PMID: 30772301 | SOX2 |
| 6730 TPM4     | SOX2 regulated genes in Keratinocyte Overexpression from PMID: 30772301 | SOX2 |
| 6731 TDRD12   | SOX2 regulated genes in Keratinocyte Overexpression from PMID: 30772301 | SOX2 |
| 6732 VAMP3    | SOX2 regulated genes in Keratinocyte Overexpression from PMID: 30772301 | SOX2 |
| 6733 ALDH18A1 | SOX2 regulated genes in Keratinocyte Overexpression from PMID: 30772301 | SOX2 |
| 6734 ZDHHC24  | SOX2 regulated genes in Keratinocyte Overexpression from PMID: 30772301 | SOX2 |
| 6735 CDCA7    | SOX2 regulated genes in Keratinocyte Overexpression from PMID: 30772301 | SOX2 |
| 6736 PIGT     | SOX2 regulated genes in Keratinocyte Overexpression from PMID: 30772301 | SOX2 |
| 6737 EMD      | SOX2 regulated genes in Keratinocyte Overexpression from PMID: 30772301 | SOX2 |
| 6738 WDR18    | SOX2 regulated genes in Keratinocyte Overexpression from PMID: 30772301 | SOX2 |
| 6739 SLC52A2  | SOX2 regulated genes in Keratinocyte Overexpression from PMID: 30772301 | SOX2 |
| 6740 DENR     | SOX2 regulated genes in Keratinocyte Overexpression from PMID: 30772301 | SOX2 |
| 6741 GLT1D1   | SOX2 regulated genes in Keratinocyte Overexpression from PMID: 30772301 | SOX2 |
| 6742 LCAT     | SOX2 regulated genes in Keratinocyte Overexpression from PMID: 30772301 | SOX2 |
| 6743 CRYBG3   | SOX2 regulated genes in Keratinocyte Overexpression from PMID: 30772301 | SOX2 |
| 6744 TMEM102  | SOX2 regulated genes in Keratinocyte Overexpression from PMID: 30772301 | SOX2 |
| 6745 C2orf49  | SOX2 regulated genes in Keratinocyte Overexpression from PMID: 30772301 | SOX2 |
| 6746 CASC3    | SOX2 regulated genes in Keratinocyte Overexpression from PMID: 30772301 | SOX2 |
| 6747 SLC35B1  | SOX2 regulated genes in Keratinocyte Overexpression from PMID: 30772301 | SOX2 |
| 6748 MAPK13   | SOX2 regulated genes in Keratinocyte Overexpression from PMID: 30772301 | SOX2 |
| 6749 JOSD1    | SOX2 regulated genes in Keratinocyte Overexpression from PMID: 30772301 | SOX2 |
| 6750 ASIC1    | SOX2 regulated genes in Keratinocyte Overexpression from PMID: 30772301 | SOX2 |
| 6751 PCSK1    | SOX2 regulated genes in Keratinocyte Overexpression from PMID: 30772301 | SOX2 |
| 6752 CEACAM21 | SOX2 regulated genes in Keratinocyte Overexpression from PMID: 30772301 | SOX2 |
| 6753 UTP6     | SOX2 regulated genes in Keratinocyte Overexpression from PMID: 30772301 | SOX2 |
| 6754 TOMM70   | SOX2 regulated genes in Keratinocyte Overexpression from PMID: 30772301 | SOX2 |
| 6755 LCOR     | SOX2 regulated genes in Keratinocyte Overexpression from PMID: 30772301 | SOX2 |
| 6756 KIF24    | SOX2 regulated genes in Keratinocyte Overexpression from PMID: 30772301 | SOX2 |
| 6757 CCDC61   | SOX2 regulated genes in Keratinocyte Overexpression from PMID: 30772301 | SOX2 |
| 6758 RRM1     | SOX2 regulated genes in Keratinocyte Overexpression from PMID: 30772301 | SOX2 |
| 6759 TRPV5    | SOX2 regulated genes in Keratinocyte Overexpression from PMID: 30772301 | SOX2 |
| 6760 NEMP1    | SOX2 regulated genes in Keratinocyte Overexpression from PMID: 30772301 | SOX2 |
| 6761 SBF1     | SOX2 regulated genes in Keratinocyte Overexpression from PMID: 30772301 | SOX2 |
| 6762 CAPN11   | SOX2 regulated genes in Keratinocyte Overexpression from PMID: 30772301 | SOX2 |
| 6763 WNT6     | SOX2 regulated genes in Keratinocyte Overexpression from PMID: 30772301 | SOX2 |
| 6764 SPOCK3   | SOX2 regulated genes in Keratinocyte Overexpression from PMID: 30772301 | SOX2 |
| 6765 CTRL     | SOX2 regulated genes in Keratinocyte Overexpression from PMID: 30772301 | SOX2 |
| 6766 SMO      | SOX2 regulated genes in Keratinocyte Overexpression from PMID: 30772301 | SOX2 |
| 6767 KNOP1    | SOX2 regulated genes in Keratinocyte Overexpression from PMID: 30772301 | SOX2 |
| 6768 DNAJC21  | SOX2 regulated genes in Keratinocyte Overexpression from PMID: 30772301 | SOX2 |
| 6769 CARM1    | SOX2 regulated genes in Keratinocyte Overexpression from PMID: 30772301 | SOX2 |

|               |                                                                         |      |
|---------------|-------------------------------------------------------------------------|------|
| 6770 NUSAP1   | SOX2 regulated genes in Keratinocyte Overexpression from PMID: 30772301 | SOX2 |
| 6771 PSMD12   | SOX2 regulated genes in Keratinocyte Overexpression from PMID: 30772301 | SOX2 |
| 6772 NFKB1B   | SOX2 regulated genes in Keratinocyte Overexpression from PMID: 30772301 | SOX2 |
| 6773 PPP4R4   | SOX2 regulated genes in Keratinocyte Overexpression from PMID: 30772301 | SOX2 |
| 6774 ESRP2    | SOX2 regulated genes in Keratinocyte Overexpression from PMID: 30772301 | SOX2 |
| 6775 PEX7     | SOX2 regulated genes in Keratinocyte Overexpression from PMID: 30772301 | SOX2 |
| 6776 IYD      | SOX2 regulated genes in Keratinocyte Overexpression from PMID: 30772301 | SOX2 |
| 6777 BCDIN3D  | SOX2 regulated genes in Keratinocyte Overexpression from PMID: 30772301 | SOX2 |
| 6778 NCKAP1   | SOX2 regulated genes in Keratinocyte Overexpression from PMID: 30772301 | SOX2 |
| 6779 ILVBL    | SOX2 regulated genes in Keratinocyte Overexpression from PMID: 30772301 | SOX2 |
| 6780 NEK6     | SOX2 regulated genes in Keratinocyte Overexpression from PMID: 30772301 | SOX2 |
| 6781 PRKCH    | SOX2 regulated genes in Keratinocyte Overexpression from PMID: 30772301 | SOX2 |
| 6782 POLD2    | SOX2 regulated genes in Keratinocyte Overexpression from PMID: 30772301 | SOX2 |
| 6783 ZNF740   | SOX2 regulated genes in Keratinocyte Overexpression from PMID: 30772301 | SOX2 |
| 6784 NIPBL    | SOX2 regulated genes in Keratinocyte Overexpression from PMID: 30772301 | SOX2 |
| 6785 CPA4     | SOX2 regulated genes in Keratinocyte Overexpression from PMID: 30772301 | SOX2 |
| 6786 SNAI2    | SOX2 regulated genes in Keratinocyte Overexpression from PMID: 30772301 | SOX2 |
| 6787 SMYD4    | SOX2 regulated genes in Keratinocyte Overexpression from PMID: 30772301 | SOX2 |
| 6788 CDPF1    | SOX2 regulated genes in Keratinocyte Overexpression from PMID: 30772301 | SOX2 |
| 6789 DNAJB6   | SOX2 regulated genes in Keratinocyte Overexpression from PMID: 30772301 | SOX2 |
| 6790 DCAF10   | SOX2 regulated genes in Keratinocyte Overexpression from PMID: 30772301 | SOX2 |
| 6791 CLSPN    | SOX2 regulated genes in Keratinocyte Overexpression from PMID: 30772301 | SOX2 |
| 6792 CFPD1    | SOX2 regulated genes in Keratinocyte Overexpression from PMID: 30772301 | SOX2 |
| 6793 EYA1     | SOX2 regulated genes in Keratinocyte Overexpression from PMID: 30772301 | SOX2 |
| 6794 UBN1     | SOX2 regulated genes in Keratinocyte Overexpression from PMID: 30772301 | SOX2 |
| 6795 ATXN7L3B | SOX2 regulated genes in Keratinocyte Overexpression from PMID: 30772301 | SOX2 |
| 6796 GALNT6   | SOX2 regulated genes in Keratinocyte Overexpression from PMID: 30772301 | SOX2 |
| 6797 TTC23    | SOX2 regulated genes in Keratinocyte Overexpression from PMID: 30772301 | SOX2 |
| 6798 TCP11L2  | SOX2 regulated genes in Keratinocyte Overexpression from PMID: 30772301 | SOX2 |
| 6799 CHCHD4   | SOX2 regulated genes in Keratinocyte Overexpression from PMID: 30772301 | SOX2 |
| 6800 CEP89    | SOX2 regulated genes in Keratinocyte Overexpression from PMID: 30772301 | SOX2 |
| 6801 FBXW8    | SOX2 regulated genes in Keratinocyte Overexpression from PMID: 30772301 | SOX2 |
| 6802 DMRTA2   | SOX2 regulated genes in Keratinocyte Overexpression from PMID: 30772301 | SOX2 |
| 6803 KAT7     | SOX2 regulated genes in Keratinocyte Overexpression from PMID: 30772301 | SOX2 |
| 6804 NCAPH2   | SOX2 regulated genes in Keratinocyte Overexpression from PMID: 30772301 | SOX2 |
| 6805 PPP2R1A  | SOX2 regulated genes in Keratinocyte Overexpression from PMID: 30772301 | SOX2 |
| 6806 SAFB2    | SOX2 regulated genes in Keratinocyte Overexpression from PMID: 30772301 | SOX2 |
| 6807 IGF2R    | SOX2 regulated genes in Keratinocyte Overexpression from PMID: 30772301 | SOX2 |
| 6808 AOC2     | SOX2 regulated genes in Keratinocyte Overexpression from PMID: 30772301 | SOX2 |
| 6809 EXOSC9   | SOX2 regulated genes in Keratinocyte Overexpression from PMID: 30772301 | SOX2 |
| 6810 IGSF11   | SOX2 regulated genes in Keratinocyte Overexpression from PMID: 30772301 | SOX2 |
| 6811 ALDH4A1  | SOX2 regulated genes in Keratinocyte Overexpression from PMID: 30772301 | SOX2 |
| 6812 SEMA3F   | SOX2 regulated genes in Keratinocyte Overexpression from PMID: 30772301 | SOX2 |
| 6813 ZBTB1    | SOX2 regulated genes in Keratinocyte Overexpression from PMID: 30772301 | SOX2 |
| 6814 MRPL54   | SOX2 regulated genes in Keratinocyte Overexpression from PMID: 30772301 | SOX2 |
| 6815 RPL22    | SOX2 regulated genes in Keratinocyte Overexpression from PMID: 30772301 | SOX2 |
| 6816 KRT80    | SOX2 regulated genes in Keratinocyte Overexpression from PMID: 30772301 | SOX2 |
| 6817 SOX5     | SOX2 regulated genes in Keratinocyte Overexpression from PMID: 30772301 | SOX2 |
| 6818 GTF3C4   | SOX2 regulated genes in Keratinocyte Overexpression from PMID: 30772301 | SOX2 |
| 6819 TRPM4    | SOX2 regulated genes in Keratinocyte Overexpression from PMID: 30772301 | SOX2 |
| 6820 PAXIP1   | SOX2 regulated genes in Keratinocyte Overexpression from PMID: 30772301 | SOX2 |
| 6821 AARSD1   | SOX2 regulated genes in Keratinocyte Overexpression from PMID: 30772301 | SOX2 |
| 6822 ZRANB3   | SOX2 regulated genes in Keratinocyte Overexpression from PMID: 30772301 | SOX2 |
| 6823 GPR173   | SOX2 regulated genes in Keratinocyte Overexpression from PMID: 30772301 | SOX2 |
| 6824 HSPA1L   | SOX2 regulated genes in Keratinocyte Overexpression from PMID: 30772301 | SOX2 |
| 6825 TMEM170A | SOX2 regulated genes in Keratinocyte Overexpression from PMID: 30772301 | SOX2 |
| 6826 NOC3L    | SOX2 regulated genes in Keratinocyte Overexpression from PMID: 30772301 | SOX2 |
| 6827 MTRF1L   | SOX2 regulated genes in Keratinocyte Overexpression from PMID: 30772301 | SOX2 |
| 6828 ATF1     | SOX2 regulated genes in Keratinocyte Overexpression from PMID: 30772301 | SOX2 |
| 6829 MED18    | SOX2 regulated genes in Keratinocyte Overexpression from PMID: 30772301 | SOX2 |
| 6830 GPC3     | SOX2 regulated genes in Keratinocyte Overexpression from PMID: 30772301 | SOX2 |

|               |                                                                         |      |
|---------------|-------------------------------------------------------------------------|------|
| 6831 SYBU     | SOX2 regulated genes in Keratinocyte Overexpression from PMID: 30772301 | SOX2 |
| 6832 BBS1     | SOX2 regulated genes in Keratinocyte Overexpression from PMID: 30772301 | SOX2 |
| 6833 SUPT4H1  | SOX2 regulated genes in Keratinocyte Overexpression from PMID: 30772301 | SOX2 |
| 6834 TSSK6    | SOX2 regulated genes in Keratinocyte Overexpression from PMID: 30772301 | SOX2 |
| 6835 UTP14C   | SOX2 regulated genes in Keratinocyte Overexpression from PMID: 30772301 | SOX2 |
| 6836 PLCH2    | SOX2 regulated genes in Keratinocyte Overexpression from PMID: 30772301 | SOX2 |
| 6837 UBR5     | SOX2 regulated genes in Keratinocyte Overexpression from PMID: 30772301 | SOX2 |
| 6838 EDC4     | SOX2 regulated genes in Keratinocyte Overexpression from PMID: 30772301 | SOX2 |
| 6839 LSM8     | SOX2 regulated genes in Keratinocyte Overexpression from PMID: 30772301 | SOX2 |
| 6840 LCN12    | SOX2 regulated genes in Keratinocyte Overexpression from PMID: 30772301 | SOX2 |
| 6841 MBNL3    | SOX2 regulated genes in Keratinocyte Overexpression from PMID: 30772301 | SOX2 |
| 6842 NAE1     | SOX2 regulated genes in Keratinocyte Overexpression from PMID: 30772301 | SOX2 |
| 6843 SOX10    | SOX2 regulated genes in Keratinocyte Overexpression from PMID: 30772301 | SOX2 |
| 6844 STRN4    | SOX2 regulated genes in Keratinocyte Overexpression from PMID: 30772301 | SOX2 |
| 6845 SLC38A3  | SOX2 regulated genes in Keratinocyte Overexpression from PMID: 30772301 | SOX2 |
| 6846 RIOX2    | SOX2 regulated genes in Keratinocyte Overexpression from PMID: 30772301 | SOX2 |
| 6847 HELQ     | SOX2 regulated genes in Keratinocyte Overexpression from PMID: 30772301 | SOX2 |
| 6848 CD200R1  | SOX2 regulated genes in Keratinocyte Overexpression from PMID: 30772301 | SOX2 |
| 6849 EXOSC8   | SOX2 regulated genes in Keratinocyte Overexpression from PMID: 30772301 | SOX2 |
| 6850 FANCE    | SOX2 regulated genes in Keratinocyte Overexpression from PMID: 30772301 | SOX2 |
| 6851 NEK5     | SOX2 regulated genes in Keratinocyte Overexpression from PMID: 30772301 | SOX2 |
| 6852 YWHAQ    | SOX2 regulated genes in Keratinocyte Overexpression from PMID: 30772301 | SOX2 |
| 6853 TENM4    | SOX2 regulated genes in Keratinocyte Overexpression from PMID: 30772301 | SOX2 |
| 6854 AMMECR1  | SOX2 regulated genes in Keratinocyte Overexpression from PMID: 30772301 | SOX2 |
| 6855 STRBP    | SOX2 regulated genes in Keratinocyte Overexpression from PMID: 30772301 | SOX2 |
| 6856 METAP1   | SOX2 regulated genes in Keratinocyte Overexpression from PMID: 30772301 | SOX2 |
| 6857 DNAJC2   | SOX2 regulated genes in Keratinocyte Overexpression from PMID: 30772301 | SOX2 |
| 6858 HAUS3    | SOX2 regulated genes in Keratinocyte Overexpression from PMID: 30772301 | SOX2 |
| 6859 PAQR5    | SOX2 regulated genes in Keratinocyte Overexpression from PMID: 30772301 | SOX2 |
| 6860 CECR2    | SOX2 regulated genes in Keratinocyte Overexpression from PMID: 30772301 | SOX2 |
| 6861 SPDL1    | SOX2 regulated genes in Keratinocyte Overexpression from PMID: 30772301 | SOX2 |
| 6862 ABLIM2   | SOX2 regulated genes in Keratinocyte Overexpression from PMID: 30772301 | SOX2 |
| 6863 PIN1     | SOX2 regulated genes in Keratinocyte Overexpression from PMID: 30772301 | SOX2 |
| 6864 PHF6     | SOX2 regulated genes in Keratinocyte Overexpression from PMID: 30772301 | SOX2 |
| 6865 CTDSPL   | SOX2 regulated genes in Keratinocyte Overexpression from PMID: 30772301 | SOX2 |
| 6866 SERHL2   | SOX2 regulated genes in Keratinocyte Overexpression from PMID: 30772301 | SOX2 |
| 6867 NOL11    | SOX2 regulated genes in Keratinocyte Overexpression from PMID: 30772301 | SOX2 |
| 6868 PIGU     | SOX2 regulated genes in Keratinocyte Overexpression from PMID: 30772301 | SOX2 |
| 6869 STX1A    | SOX2 regulated genes in Keratinocyte Overexpression from PMID: 30772301 | SOX2 |
| 6870 SDK2     | SOX2 regulated genes in Keratinocyte Overexpression from PMID: 30772301 | SOX2 |
| 6871 SRD5A2   | SOX2 regulated genes in Keratinocyte Overexpression from PMID: 30772301 | SOX2 |
| 6872 BOLA2B   | SOX2 regulated genes in Keratinocyte Overexpression from PMID: 30772301 | SOX2 |
| 6873 COPS3    | SOX2 regulated genes in Keratinocyte Overexpression from PMID: 30772301 | SOX2 |
| 6874 C9orf152 | SOX2 regulated genes in Keratinocyte Overexpression from PMID: 30772301 | SOX2 |
| 6875 UNC93A   | SOX2 regulated genes in Keratinocyte Overexpression from PMID: 30772301 | SOX2 |
| 6876 MROH7    | SOX2 regulated genes in Keratinocyte Overexpression from PMID: 30772301 | SOX2 |
| 6877 SCX      | SOX2 regulated genes in Keratinocyte Overexpression from PMID: 30772301 | SOX2 |
| 6878 ZC3H4    | SOX2 regulated genes in Keratinocyte Overexpression from PMID: 30772301 | SOX2 |
| 6879 RPL37A   | SOX2 regulated genes in Keratinocyte Overexpression from PMID: 30772301 | SOX2 |
| 6880 ADCK2    | SOX2 regulated genes in Keratinocyte Overexpression from PMID: 30772301 | SOX2 |
| 6881 SIPA1L3  | SOX2 regulated genes in Keratinocyte Overexpression from PMID: 30772301 | SOX2 |
| 6882 TMC7     | SOX2 regulated genes in Keratinocyte Overexpression from PMID: 30772301 | SOX2 |
| 6883 TMEM171  | SOX2 regulated genes in Keratinocyte Overexpression from PMID: 30772301 | SOX2 |
| 6884 OCM      | SOX2 regulated genes in Keratinocyte Overexpression from PMID: 30772301 | SOX2 |
| 6885 DYRK2    | SOX2 regulated genes in Keratinocyte Overexpression from PMID: 30772301 | SOX2 |
| 6886 PLAG1    | SOX2 regulated genes in Keratinocyte Overexpression from PMID: 30772301 | SOX2 |
| 6887 DYNLL1   | SOX2 regulated genes in Keratinocyte Overexpression from PMID: 30772301 | SOX2 |
| 6888 PTGES2   | SOX2 regulated genes in Keratinocyte Overexpression from PMID: 30772301 | SOX2 |
| 6889 PLA2G4C  | SOX2 regulated genes in Keratinocyte Overexpression from PMID: 30772301 | SOX2 |
| 6890 PXYP1    | SOX2 regulated genes in Keratinocyte Overexpression from PMID: 30772301 | SOX2 |
| 6891 RIMBP3C  | SOX2 regulated genes in Keratinocyte Overexpression from PMID: 30772301 | SOX2 |

|      |           |                                                                         |      |
|------|-----------|-------------------------------------------------------------------------|------|
| 6892 | NDFIP2    | SOX2 regulated genes in Keratinocyte Overexpression from PMID: 30772301 | SOX2 |
| 6893 | RSPO3     | SOX2 regulated genes in Keratinocyte Overexpression from PMID: 30772301 | SOX2 |
| 6894 | TMEM185A  | SOX2 regulated genes in Keratinocyte Overexpression from PMID: 30772301 | SOX2 |
| 6895 | LSM3      | SOX2 regulated genes in Keratinocyte Overexpression from PMID: 30772301 | SOX2 |
| 6896 | ATP6V1H   | SOX2 regulated genes in Keratinocyte Overexpression from PMID: 30772301 | SOX2 |
| 6897 | EPCAM     | SOX2 regulated genes in Keratinocyte Overexpression from PMID: 30772301 | SOX2 |
| 6898 | EEF1AKMT1 | SOX2 regulated genes in Keratinocyte Overexpression from PMID: 30772301 | SOX2 |
| 6899 | LATS1     | SOX2 regulated genes in Keratinocyte Overexpression from PMID: 30772301 | SOX2 |
| 6900 | PPP4R3A   | SOX2 regulated genes in Keratinocyte Overexpression from PMID: 30772301 | SOX2 |
| 6901 | APBA3     | SOX2 regulated genes in Keratinocyte Overexpression from PMID: 30772301 | SOX2 |
| 6902 | SERTAD3   | SOX2 regulated genes in Keratinocyte Overexpression from PMID: 30772301 | SOX2 |
| 6903 | PPP1CB    | SOX2 regulated genes in Keratinocyte Overexpression from PMID: 30772301 | SOX2 |
| 6904 | MCM4      | SOX2 regulated genes in Keratinocyte Overexpression from PMID: 30772301 | SOX2 |
| 6905 | ODF2L     | SOX2 regulated genes in Keratinocyte Overexpression from PMID: 30772301 | SOX2 |
| 6906 | CASP8AP2  | SOX2 regulated genes in Keratinocyte Overexpression from PMID: 30772301 | SOX2 |
| 6907 | SKIL      | SOX2 regulated genes in Keratinocyte Overexpression from PMID: 30772301 | SOX2 |
| 6908 | FUBP3     | SOX2 regulated genes in Keratinocyte Overexpression from PMID: 30772301 | SOX2 |
| 6909 | MTBP      | SOX2 regulated genes in Keratinocyte Overexpression from PMID: 30772301 | SOX2 |
| 6910 | PSCA      | SOX2 regulated genes in Keratinocyte Overexpression from PMID: 30772301 | SOX2 |
| 6911 | VPS33B    | SOX2 regulated genes in Keratinocyte Overexpression from PMID: 30772301 | SOX2 |
| 6912 | RAB3B     | SOX2 regulated genes in Keratinocyte Overexpression from PMID: 30772301 | SOX2 |
| 6913 | CLDN34    | SOX2 regulated genes in Keratinocyte Overexpression from PMID: 30772301 | SOX2 |
| 6914 | LRRC45    | SOX2 regulated genes in Keratinocyte Overexpression from PMID: 30772301 | SOX2 |
| 6915 | HMMR      | SOX2 regulated genes in Keratinocyte Overexpression from PMID: 30772301 | SOX2 |
| 6916 | RAC3      | SOX2 regulated genes in Keratinocyte Overexpression from PMID: 30772301 | SOX2 |
| 6917 | NECAB1    | SOX2 regulated genes in Keratinocyte Overexpression from PMID: 30772301 | SOX2 |
| 6918 | ZNF248    | SOX2 regulated genes in Keratinocyte Overexpression from PMID: 30772301 | SOX2 |
| 6919 | PSMA1     | SOX2 regulated genes in Keratinocyte Overexpression from PMID: 30772301 | SOX2 |
| 6920 | CKAP4     | SOX2 regulated genes in Keratinocyte Overexpression from PMID: 30772301 | SOX2 |
| 6921 | LGALS1    | SOX2 regulated genes in Keratinocyte Overexpression from PMID: 30772301 | SOX2 |
| 6922 | ARMC5     | SOX2 regulated genes in Keratinocyte Overexpression from PMID: 30772301 | SOX2 |
| 6923 | PSMD11    | SOX2 regulated genes in Keratinocyte Overexpression from PMID: 30772301 | SOX2 |
| 6924 | FBXL6     | SOX2 regulated genes in Keratinocyte Overexpression from PMID: 30772301 | SOX2 |
| 6925 | CYC1      | SOX2 regulated genes in Keratinocyte Overexpression from PMID: 30772301 | SOX2 |
| 6926 | RPL31     | SOX2 regulated genes in Keratinocyte Overexpression from PMID: 30772301 | SOX2 |
| 6927 | SMDT1     | SOX2 regulated genes in Keratinocyte Overexpression from PMID: 30772301 | SOX2 |
| 6928 | TALDO1    | SOX2 regulated genes in Keratinocyte Overexpression from PMID: 30772301 | SOX2 |
| 6929 | ZFP37     | SOX2 regulated genes in Keratinocyte Overexpression from PMID: 30772301 | SOX2 |
| 6930 | SNF8      | SOX2 regulated genes in Keratinocyte Overexpression from PMID: 30772301 | SOX2 |
| 6931 | CFAP54    | SOX2 regulated genes in Keratinocyte Overexpression from PMID: 30772301 | SOX2 |
| 6932 | ACAT1     | SOX2 regulated genes in Keratinocyte Overexpression from PMID: 30772301 | SOX2 |
| 6933 | STARD4    | SOX2 regulated genes in Keratinocyte Overexpression from PMID: 30772301 | SOX2 |
| 6934 | SAAL1     | SOX2 regulated genes in Keratinocyte Overexpression from PMID: 30772301 | SOX2 |
| 6935 | PRPF18    | SOX2 regulated genes in Keratinocyte Overexpression from PMID: 30772301 | SOX2 |
| 6936 | BMPR1B    | SOX2 regulated genes in Keratinocyte Overexpression from PMID: 30772301 | SOX2 |
| 6937 | ANKRD6    | SOX2 regulated genes in Keratinocyte Overexpression from PMID: 30772301 | SOX2 |
| 6938 | LHX2      | SOX2 regulated genes in Keratinocyte Overexpression from PMID: 30772301 | SOX2 |
| 6939 | NELFA     | SOX2 regulated genes in Keratinocyte Overexpression from PMID: 30772301 | SOX2 |
| 6940 | TMEM129   | SOX2 regulated genes in Keratinocyte Overexpression from PMID: 30772301 | SOX2 |
| 6941 | C4orf46   | SOX2 regulated genes in Keratinocyte Overexpression from PMID: 30772301 | SOX2 |
| 6942 | MCC       | SOX2 regulated genes in Keratinocyte Overexpression from PMID: 30772301 | SOX2 |
| 6943 | TBCC      | SOX2 regulated genes in Keratinocyte Overexpression from PMID: 30772301 | SOX2 |
| 6944 | RAB37     | SOX2 regulated genes in Keratinocyte Overexpression from PMID: 30772301 | SOX2 |
| 6945 | EGR4      | SOX2 regulated genes in Keratinocyte Overexpression from PMID: 30772301 | SOX2 |
| 6946 | CHSY3     | SOX2 regulated genes in Keratinocyte Overexpression from PMID: 30772301 | SOX2 |
| 6947 | ZNF2      | SOX2 regulated genes in Keratinocyte Overexpression from PMID: 30772301 | SOX2 |
| 6948 | FZD6      | SOX2 regulated genes in Keratinocyte Overexpression from PMID: 30772301 | SOX2 |
| 6949 | NELFE     | SOX2 regulated genes in Keratinocyte Overexpression from PMID: 30772301 | SOX2 |
| 6950 | TRMT10A   | SOX2 regulated genes in Keratinocyte Overexpression from PMID: 30772301 | SOX2 |
| 6951 | DSCC1     | SOX2 regulated genes in Keratinocyte Overexpression from PMID: 30772301 | SOX2 |
| 6952 | DNAH17    | SOX2 regulated genes in Keratinocyte Overexpression from PMID: 30772301 | SOX2 |

|               |                                                                         |      |
|---------------|-------------------------------------------------------------------------|------|
| 6953 CRB3     | SOX2 regulated genes in Keratinocyte Overexpression from PMID: 30772301 | SOX2 |
| 6954 CREBBP   | SOX2 regulated genes in Keratinocyte Overexpression from PMID: 30772301 | SOX2 |
| 6955 PMPCA    | SOX2 regulated genes in Keratinocyte Overexpression from PMID: 30772301 | SOX2 |
| 6956 C11orf94 | SOX2 regulated genes in Keratinocyte Overexpression from PMID: 30772301 | SOX2 |
| 6957 BARD1    | SOX2 regulated genes in Keratinocyte Overexpression from PMID: 30772301 | SOX2 |
| 6958 DNAJA2   | SOX2 regulated genes in Keratinocyte Overexpression from PMID: 30772301 | SOX2 |
| 6959 TPBG     | SOX2 regulated genes in Keratinocyte Overexpression from PMID: 30772301 | SOX2 |
| 6960 RANBP17  | SOX2 regulated genes in Keratinocyte Overexpression from PMID: 30772301 | SOX2 |
| 6961 KIAA1958 | SOX2 regulated genes in Keratinocyte Overexpression from PMID: 30772301 | SOX2 |
| 6962 MSH3     | SOX2 regulated genes in Keratinocyte Overexpression from PMID: 30772301 | SOX2 |
| 6963 PDCD5    | SOX2 regulated genes in Keratinocyte Overexpression from PMID: 30772301 | SOX2 |
| 6964 ATN1     | SOX2 regulated genes in Keratinocyte Overexpression from PMID: 30772301 | SOX2 |
| 6965 PIP4K2C  | SOX2 regulated genes in Keratinocyte Overexpression from PMID: 30772301 | SOX2 |
| 6966 DEF6     | SOX2 regulated genes in Keratinocyte Overexpression from PMID: 30772301 | SOX2 |
| 6967 TMTC3    | SOX2 regulated genes in Keratinocyte Overexpression from PMID: 30772301 | SOX2 |
| 6968 PHLDB2   | SOX2 regulated genes in Keratinocyte Overexpression from PMID: 30772301 | SOX2 |
| 6969 LGALS12  | SOX2 regulated genes in Keratinocyte Overexpression from PMID: 30772301 | SOX2 |
| 6970 ZC3HC1   | SOX2 regulated genes in Keratinocyte Overexpression from PMID: 30772301 | SOX2 |
| 6971 DCAF13   | SOX2 regulated genes in Keratinocyte Overexpression from PMID: 30772301 | SOX2 |
| 6972 CHIC1    | SOX2 regulated genes in Keratinocyte Overexpression from PMID: 30772301 | SOX2 |
| 6973 TP53BP1  | SOX2 regulated genes in Keratinocyte Overexpression from PMID: 30772301 | SOX2 |
| 6974 SBK1     | SOX2 regulated genes in Keratinocyte Overexpression from PMID: 30772301 | SOX2 |
| 6975 GPLD1    | SOX2 regulated genes in Keratinocyte Overexpression from PMID: 30772301 | SOX2 |
| 6976 AHI1     | SOX2 regulated genes in Keratinocyte Overexpression from PMID: 30772301 | SOX2 |
| 6977 NHS      | SOX2 regulated genes in Keratinocyte Overexpression from PMID: 30772301 | SOX2 |
| 6978 IFT80    | SOX2 regulated genes in Keratinocyte Overexpression from PMID: 30772301 | SOX2 |
| 6979 PAM16    | SOX2 regulated genes in Keratinocyte Overexpression from PMID: 30772301 | SOX2 |
| 6980 ZCCHC10  | SOX2 regulated genes in Keratinocyte Overexpression from PMID: 30772301 | SOX2 |
| 6981 SLF1     | SOX2 regulated genes in Keratinocyte Overexpression from PMID: 30772301 | SOX2 |
| 6982 MCMBP    | SOX2 regulated genes in Keratinocyte Overexpression from PMID: 30772301 | SOX2 |
| 6983 OSGIN2   | SOX2 regulated genes in Keratinocyte Overexpression from PMID: 30772301 | SOX2 |
| 6984 XYLB     | SOX2 regulated genes in Keratinocyte Overexpression from PMID: 30772301 | SOX2 |
| 6985 BTBD10   | SOX2 regulated genes in Keratinocyte Overexpression from PMID: 30772301 | SOX2 |
| 6986 CLIC4    | SOX2 regulated genes in Keratinocyte Overexpression from PMID: 30772301 | SOX2 |
| 6987 GEMIN6   | SOX2 regulated genes in Keratinocyte Overexpression from PMID: 30772301 | SOX2 |
| 6988 MRPL46   | SOX2 regulated genes in Keratinocyte Overexpression from PMID: 30772301 | SOX2 |
| 6989 ATP7A    | SOX2 regulated genes in Keratinocyte Overexpression from PMID: 30772301 | SOX2 |
| 6990 PPM1B    | SOX2 regulated genes in Keratinocyte Overexpression from PMID: 30772301 | SOX2 |
| 6991 GADD45A  | SOX2 regulated genes in Keratinocyte Overexpression from PMID: 30772301 | SOX2 |
| 6992 WTAP     | SOX2 regulated genes in Keratinocyte Overexpression from PMID: 30772301 | SOX2 |
| 6993 GRIK4    | SOX2 regulated genes in Keratinocyte Overexpression from PMID: 30772301 | SOX2 |
| 6994 MED26    | SOX2 regulated genes in Keratinocyte Overexpression from PMID: 30772301 | SOX2 |
| 6995 PREX2    | SOX2 regulated genes in Keratinocyte Overexpression from PMID: 30772301 | SOX2 |
| 6996 GGACT    | SOX2 regulated genes in Keratinocyte Overexpression from PMID: 30772301 | SOX2 |
| 6997 ARNTL    | SOX2 regulated genes in Keratinocyte Overexpression from PMID: 30772301 | SOX2 |
| 6998 SLC30A4  | SOX2 regulated genes in Keratinocyte Overexpression from PMID: 30772301 | SOX2 |
| 6999 SUGT1    | SOX2 regulated genes in Keratinocyte Overexpression from PMID: 30772301 | SOX2 |
| 7000 PPWD1    | SOX2 regulated genes in Keratinocyte Overexpression from PMID: 30772301 | SOX2 |
| 7001 RASSF7   | SOX2 regulated genes in Keratinocyte Overexpression from PMID: 30772301 | SOX2 |
| 7002 TUBB4B   | SOX2 regulated genes in Keratinocyte Overexpression from PMID: 30772301 | SOX2 |
| 7003 MND1     | SOX2 regulated genes in Keratinocyte Overexpression from PMID: 30772301 | SOX2 |
| 7004 ZFYVE28  | SOX2 regulated genes in Keratinocyte Overexpression from PMID: 30772301 | SOX2 |
| 7005 TTC26    | SOX2 regulated genes in Keratinocyte Overexpression from PMID: 30772301 | SOX2 |
| 7006 GARNL3   | SOX2 regulated genes in Keratinocyte Overexpression from PMID: 30772301 | SOX2 |
| 7007 PRPF6    | SOX2 regulated genes in Keratinocyte Overexpression from PMID: 30772301 | SOX2 |
| 7008 KDM4A    | SOX2 regulated genes in Keratinocyte Overexpression from PMID: 30772301 | SOX2 |
| 7009 SPATA5   | SOX2 regulated genes in Keratinocyte Overexpression from PMID: 30772301 | SOX2 |
| 7010 SYT1     | SOX2 regulated genes in Keratinocyte Overexpression from PMID: 30772301 | SOX2 |
| 7011 DUS4L    | SOX2 regulated genes in Keratinocyte Overexpression from PMID: 30772301 | SOX2 |
| 7012 MRPS9    | SOX2 regulated genes in Keratinocyte Overexpression from PMID: 30772301 | SOX2 |
| 7013 ERMARD   | SOX2 regulated genes in Keratinocyte Overexpression from PMID: 30772301 | SOX2 |

|               |                                                                         |      |
|---------------|-------------------------------------------------------------------------|------|
| 7014 NSMAF    | SOX2 regulated genes in Keratinocyte Overexpression from PMID: 30772301 | SOX2 |
| 7015 CACNG4   | SOX2 regulated genes in Keratinocyte Overexpression from PMID: 30772301 | SOX2 |
| 7016 CEP126   | SOX2 regulated genes in Keratinocyte Overexpression from PMID: 30772301 | SOX2 |
| 7017 ZFHX2    | SOX2 regulated genes in Keratinocyte Overexpression from PMID: 30772301 | SOX2 |
| 7018 TMEM132A | SOX2 regulated genes in Keratinocyte Overexpression from PMID: 30772301 | SOX2 |
| 7019 AOC1     | SOX2 regulated genes in Keratinocyte Overexpression from PMID: 30772301 | SOX2 |
| 7020 NDUFAF8  | SOX2 regulated genes in Keratinocyte Overexpression from PMID: 30772301 | SOX2 |
| 7021 HYAL2    | SOX2 regulated genes in Keratinocyte Overexpression from PMID: 30772301 | SOX2 |
| 7022 MSH5     | SOX2 regulated genes in Keratinocyte Overexpression from PMID: 30772301 | SOX2 |
| 7023 FFAR3    | SOX2 regulated genes in Keratinocyte Overexpression from PMID: 30772301 | SOX2 |
| 7024 C16orf74 | SOX2 regulated genes in Keratinocyte Overexpression from PMID: 30772301 | SOX2 |
| 7025 METTL26  | SOX2 regulated genes in Keratinocyte Overexpression from PMID: 30772301 | SOX2 |
| 7026 SC5D     | SOX2 regulated genes in Keratinocyte Overexpression from PMID: 30772301 | SOX2 |
| 7027 MIP      | SOX2 regulated genes in Keratinocyte Overexpression from PMID: 30772301 | SOX2 |
| 7028 SEC16A   | SOX2 regulated genes in Keratinocyte Overexpression from PMID: 30772301 | SOX2 |
| 7029 ZBTB8B   | SOX2 regulated genes in Keratinocyte Overexpression from PMID: 30772301 | SOX2 |
| 7030 DNAJC17  | SOX2 regulated genes in Keratinocyte Overexpression from PMID: 30772301 | SOX2 |
| 7031 MACC1    | SOX2 regulated genes in Keratinocyte Overexpression from PMID: 30772301 | SOX2 |
| 7032 FBXO34   | SOX2 regulated genes in Keratinocyte Overexpression from PMID: 30772301 | SOX2 |
| 7033 ARID4A   | SOX2 regulated genes in Keratinocyte Overexpression from PMID: 30772301 | SOX2 |
| 7034 FBXO42   | SOX2 regulated genes in Keratinocyte Overexpression from PMID: 30772301 | SOX2 |
| 7035 ESRP1    | SOX2 regulated genes in Keratinocyte Overexpression from PMID: 30772301 | SOX2 |
| 7036 FMNL2    | SOX2 regulated genes in Keratinocyte Overexpression from PMID: 30772301 | SOX2 |
| 7037 RPL30    | SOX2 regulated genes in Keratinocyte Overexpression from PMID: 30772301 | SOX2 |
| 7038 ZNF213   | SOX2 regulated genes in Keratinocyte Overexpression from PMID: 30772301 | SOX2 |
| 7039 SUPV3L1  | SOX2 regulated genes in Keratinocyte Overexpression from PMID: 30772301 | SOX2 |
| 7040 ZNF334   | SOX2 regulated genes in Keratinocyte Overexpression from PMID: 30772301 | SOX2 |
| 7041 LPAR2    | SOX2 regulated genes in Keratinocyte Overexpression from PMID: 30772301 | SOX2 |
| 7042 ZCCHC7   | SOX2 regulated genes in Keratinocyte Overexpression from PMID: 30772301 | SOX2 |
| 7043 SYP      | SOX2 regulated genes in Keratinocyte Overexpression from PMID: 30772301 | SOX2 |
| 7044 CTNNA1   | SOX2 regulated genes in Keratinocyte Overexpression from PMID: 30772301 | SOX2 |
| 7045 ANKRD27  | SOX2 regulated genes in Keratinocyte Overexpression from PMID: 30772301 | SOX2 |
| 7046 LCMT1    | SOX2 regulated genes in Keratinocyte Overexpression from PMID: 30772301 | SOX2 |
| 7047 SNTB1    | SOX2 regulated genes in Keratinocyte Overexpression from PMID: 30772301 | SOX2 |
| 7048 KLHL32   | SOX2 regulated genes in Keratinocyte Overexpression from PMID: 30772301 | SOX2 |
| 7049 STX5     | SOX2 regulated genes in Keratinocyte Overexpression from PMID: 30772301 | SOX2 |
| 7050 IGHMBP2  | SOX2 regulated genes in Keratinocyte Overexpression from PMID: 30772301 | SOX2 |
| 7051 PLD6     | SOX2 regulated genes in Keratinocyte Overexpression from PMID: 30772301 | SOX2 |
| 7052 GNA11    | SOX2 regulated genes in Keratinocyte Overexpression from PMID: 30772301 | SOX2 |
| 7053 TTL      | SOX2 regulated genes in Keratinocyte Overexpression from PMID: 30772301 | SOX2 |
| 7054 SLC25A46 | SOX2 regulated genes in Keratinocyte Overexpression from PMID: 30772301 | SOX2 |
| 7055 GLI1     | SOX2 regulated genes in Keratinocyte Overexpression from PMID: 30772301 | SOX2 |
| 7056 RBM10    | SOX2 regulated genes in Keratinocyte Overexpression from PMID: 30772301 | SOX2 |
| 7057 THAP11   | SOX2 regulated genes in Keratinocyte Overexpression from PMID: 30772301 | SOX2 |
| 7058 DCTN3    | SOX2 regulated genes in Keratinocyte Overexpression from PMID: 30772301 | SOX2 |
| 7059 CALD1    | SOX2 regulated genes in Keratinocyte Overexpression from PMID: 30772301 | SOX2 |
| 7060 FAM193B  | SOX2 regulated genes in Keratinocyte Overexpression from PMID: 30772301 | SOX2 |
| 7061 AIG1     | SOX2 regulated genes in Keratinocyte Overexpression from PMID: 30772301 | SOX2 |
| 7062 SLC9A2   | SOX2 regulated genes in Keratinocyte Overexpression from PMID: 30772301 | SOX2 |
| 7063 TMEM268  | SOX2 regulated genes in Keratinocyte Overexpression from PMID: 30772301 | SOX2 |
| 7064 HAGH     | SOX2 regulated genes in Keratinocyte Overexpression from PMID: 30772301 | SOX2 |
| 7065 NUP210   | SOX2 regulated genes in Keratinocyte Overexpression from PMID: 30772301 | SOX2 |
| 7066 LRP8     | SOX2 regulated genes in Keratinocyte Overexpression from PMID: 30772301 | SOX2 |
| 7067 RBM42    | SOX2 regulated genes in Keratinocyte Overexpression from PMID: 30772301 | SOX2 |
| 7068 PTGER4   | SOX2 regulated genes in Keratinocyte Overexpression from PMID: 30772301 | SOX2 |
| 7069 MSH2     | SOX2 regulated genes in Keratinocyte Overexpression from PMID: 30772301 | SOX2 |
| 7070 YIF1A    | SOX2 regulated genes in Keratinocyte Overexpression from PMID: 30772301 | SOX2 |
| 7071 TUFM     | SOX2 regulated genes in Keratinocyte Overexpression from PMID: 30772301 | SOX2 |
| 7072 MICAL1   | SOX2 regulated genes in Keratinocyte Overexpression from PMID: 30772301 | SOX2 |
| 7073 TCF19    | SOX2 regulated genes in Keratinocyte Overexpression from PMID: 30772301 | SOX2 |
| 7074 LZTS2    | SOX2 regulated genes in Keratinocyte Overexpression from PMID: 30772301 | SOX2 |

|               |                                                                         |      |
|---------------|-------------------------------------------------------------------------|------|
| 7075 HSPB1    | SOX2 regulated genes in Keratinocyte Overexpression from PMID: 30772301 | SOX2 |
| 7076 CPSF2    | SOX2 regulated genes in Keratinocyte Overexpression from PMID: 30772301 | SOX2 |
| 7077 SHCBP1   | SOX2 regulated genes in Keratinocyte Overexpression from PMID: 30772301 | SOX2 |
| 7078 DNLZ     | SOX2 regulated genes in Keratinocyte Overexpression from PMID: 30772301 | SOX2 |
| 7079 NSD2     | SOX2 regulated genes in Keratinocyte Overexpression from PMID: 30772301 | SOX2 |
| 7080 ZFP1     | SOX2 regulated genes in Keratinocyte Overexpression from PMID: 30772301 | SOX2 |
| 7081 GTPBP10  | SOX2 regulated genes in Keratinocyte Overexpression from PMID: 30772301 | SOX2 |
| 7082 DEPDC1B  | SOX2 regulated genes in Keratinocyte Overexpression from PMID: 30772301 | SOX2 |
| 7083 SERPINB9 | SOX2 regulated genes in Keratinocyte Overexpression from PMID: 30772301 | SOX2 |
| 7084 KIAA1549 | SOX2 regulated genes in Keratinocyte Overexpression from PMID: 30772301 | SOX2 |
| 7085 MBLAC1   | SOX2 regulated genes in Keratinocyte Overexpression from PMID: 30772301 | SOX2 |
| 7086 B3GALT6  | SOX2 regulated genes in Keratinocyte Overexpression from PMID: 30772301 | SOX2 |
| 7087 IFRD1    | SOX2 regulated genes in Keratinocyte Overexpression from PMID: 30772301 | SOX2 |
| 7088 KIT      | SOX2 regulated genes in Keratinocyte Overexpression from PMID: 30772301 | SOX2 |
| 7089 DIS3L    | SOX2 regulated genes in Keratinocyte Overexpression from PMID: 30772301 | SOX2 |
| 7090 S100PBP  | SOX2 regulated genes in Keratinocyte Overexpression from PMID: 30772301 | SOX2 |
| 7091 TDG      | SOX2 regulated genes in Keratinocyte Overexpression from PMID: 30772301 | SOX2 |
| 7092 POU2F1   | SOX2 regulated genes in Keratinocyte Overexpression from PMID: 30772301 | SOX2 |
| 7093 ABLIM3   | SOX2 regulated genes in Keratinocyte Overexpression from PMID: 30772301 | SOX2 |
| 7094 KCNK7    | SOX2 regulated genes in Keratinocyte Overexpression from PMID: 30772301 | SOX2 |
| 7095 KCNC3    | SOX2 regulated genes in Keratinocyte Overexpression from PMID: 30772301 | SOX2 |
| 7096 TXLNA    | SOX2 regulated genes in Keratinocyte Overexpression from PMID: 30772301 | SOX2 |
| 7097 DDX5     | SOX2 regulated genes in Keratinocyte Overexpression from PMID: 30772301 | SOX2 |
| 7098 RITA1    | SOX2 regulated genes in Keratinocyte Overexpression from PMID: 30772301 | SOX2 |
| 7099 RUND3A   | SOX2 regulated genes in Keratinocyte Overexpression from PMID: 30772301 | SOX2 |
| 7100 NLRX1    | SOX2 regulated genes in Keratinocyte Overexpression from PMID: 30772301 | SOX2 |
| 7101 DDX59    | SOX2 regulated genes in Keratinocyte Overexpression from PMID: 30772301 | SOX2 |
| 7102 ARHGAP29 | SOX2 regulated genes in Keratinocyte Overexpression from PMID: 30772301 | SOX2 |
| 7103 FBXO25   | SOX2 regulated genes in Keratinocyte Overexpression from PMID: 30772301 | SOX2 |
| 7104 SMPD4    | SOX2 regulated genes in Keratinocyte Overexpression from PMID: 30772301 | SOX2 |
| 7105 ODF2     | SOX2 regulated genes in Keratinocyte Overexpression from PMID: 30772301 | SOX2 |
| 7106 TXNL4B   | SOX2 regulated genes in Keratinocyte Overexpression from PMID: 30772301 | SOX2 |
| 7107 TIGD5    | SOX2 regulated genes in Keratinocyte Overexpression from PMID: 30772301 | SOX2 |
| 7108 PLA2G4B  | SOX2 regulated genes in Keratinocyte Overexpression from PMID: 30772301 | SOX2 |
| 7109 HAU58    | SOX2 regulated genes in Keratinocyte Overexpression from PMID: 30772301 | SOX2 |
| 7110 C6orf163 | SOX2 regulated genes in Keratinocyte Overexpression from PMID: 30772301 | SOX2 |
| 7111 FBXO38   | SOX2 regulated genes in Keratinocyte Overexpression from PMID: 30772301 | SOX2 |
| 7112 UBE3B    | SOX2 regulated genes in Keratinocyte Overexpression from PMID: 30772301 | SOX2 |
| 7113 CACNA1H  | SOX2 regulated genes in Keratinocyte Overexpression from PMID: 30772301 | SOX2 |
| 7114 RFX1     | SOX2 regulated genes in Keratinocyte Overexpression from PMID: 30772301 | SOX2 |
| 7115 TTC13    | SOX2 regulated genes in Keratinocyte Overexpression from PMID: 30772301 | SOX2 |
| 7116 NGEF     | SOX2 regulated genes in Keratinocyte Overexpression from PMID: 30772301 | SOX2 |
| 7117 LRRC59   | SOX2 regulated genes in Keratinocyte Overexpression from PMID: 30772301 | SOX2 |
| 7118 PDCD10   | SOX2 regulated genes in Keratinocyte Overexpression from PMID: 30772301 | SOX2 |
| 7119 TOP2B    | SOX2 regulated genes in Keratinocyte Overexpression from PMID: 30772301 | SOX2 |
| 7120 OVCA2    | SOX2 regulated genes in Keratinocyte Overexpression from PMID: 30772301 | SOX2 |
| 7121 COX7A2   | SOX2 regulated genes in Keratinocyte Overexpression from PMID: 30772301 | SOX2 |
| 7122 SPSB2    | SOX2 regulated genes in Keratinocyte Overexpression from PMID: 30772301 | SOX2 |
| 7123 SNAPC2   | SOX2 regulated genes in Keratinocyte Overexpression from PMID: 30772301 | SOX2 |
| 7124 LETMD1   | SOX2 regulated genes in Keratinocyte Overexpression from PMID: 30772301 | SOX2 |
| 7125 TRMT13   | SOX2 regulated genes in Keratinocyte Overexpression from PMID: 30772301 | SOX2 |
| 7126 TRNAU1AP | SOX2 regulated genes in Keratinocyte Overexpression from PMID: 30772301 | SOX2 |
| 7127 HEXIM2   | SOX2 regulated genes in Keratinocyte Overexpression from PMID: 30772301 | SOX2 |
| 7128 C3orf62  | SOX2 regulated genes in Keratinocyte Overexpression from PMID: 30772301 | SOX2 |
| 7129 KIFC1    | SOX2 regulated genes in Keratinocyte Overexpression from PMID: 30772301 | SOX2 |
| 7130 PFDN6    | SOX2 regulated genes in Keratinocyte Overexpression from PMID: 30772301 | SOX2 |
| 7131 PPM1D    | SOX2 regulated genes in Keratinocyte Overexpression from PMID: 30772301 | SOX2 |
| 7132 CD320    | SOX2 regulated genes in Keratinocyte Overexpression from PMID: 30772301 | SOX2 |
| 7133 NUDC     | SOX2 regulated genes in Keratinocyte Overexpression from PMID: 30772301 | SOX2 |
| 7134 TRADD    | SOX2 regulated genes in Keratinocyte Overexpression from PMID: 30772301 | SOX2 |
| 7135 SSB      | SOX2 regulated genes in Keratinocyte Overexpression from PMID: 30772301 | SOX2 |

|               |                                                                         |      |
|---------------|-------------------------------------------------------------------------|------|
| 7136 MUL1     | SOX2 regulated genes in Keratinocyte Overexpression from PMID: 30772301 | SOX2 |
| 7137 C16orf91 | SOX2 regulated genes in Keratinocyte Overexpression from PMID: 30772301 | SOX2 |
| 7138 CHMP2B   | SOX2 regulated genes in Keratinocyte Overexpression from PMID: 30772301 | SOX2 |
| 7139 FAM169A  | SOX2 regulated genes in Keratinocyte Overexpression from PMID: 30772301 | SOX2 |
| 7140 TFPT     | SOX2 regulated genes in Keratinocyte Overexpression from PMID: 30772301 | SOX2 |
| 7141 ZFAND2B  | SOX2 regulated genes in Keratinocyte Overexpression from PMID: 30772301 | SOX2 |
| 7142 PHLDA3   | SOX2 regulated genes in Keratinocyte Overexpression from PMID: 30772301 | SOX2 |
| 7143 ARAP2    | SOX2 regulated genes in Keratinocyte Overexpression from PMID: 30772301 | SOX2 |
| 7144 ATP13A2  | SOX2 regulated genes in Keratinocyte Overexpression from PMID: 30772301 | SOX2 |
| 7145 RAD9A    | SOX2 regulated genes in Keratinocyte Overexpression from PMID: 30772301 | SOX2 |
| 7146 PLEKHG6  | SOX2 regulated genes in Keratinocyte Overexpression from PMID: 30772301 | SOX2 |
| 7147 AMT      | SOX2 regulated genes in Keratinocyte Overexpression from PMID: 30772301 | SOX2 |
| 7148 ERI2     | SOX2 regulated genes in Keratinocyte Overexpression from PMID: 30772301 | SOX2 |
| 7149 CPNE4    | SOX2 regulated genes in Keratinocyte Overexpression from PMID: 30772301 | SOX2 |
| 7150 KLK7     | SOX2 regulated genes in Keratinocyte Overexpression from PMID: 30772301 | SOX2 |
| 7151 PYM1     | SOX2 regulated genes in Keratinocyte Overexpression from PMID: 30772301 | SOX2 |
| 7152 ATG9B    | SOX2 regulated genes in Keratinocyte Overexpression from PMID: 30772301 | SOX2 |
| 7153 ECE1     | SOX2 regulated genes in Keratinocyte Overexpression from PMID: 30772301 | SOX2 |
| 7154 ZNF768   | SOX2 regulated genes in Keratinocyte Overexpression from PMID: 30772301 | SOX2 |
| 7155 NPLOC4   | SOX2 regulated genes in Keratinocyte Overexpression from PMID: 30772301 | SOX2 |
| 7156 RAD54L   | SOX2 regulated genes in Keratinocyte Overexpression from PMID: 30772301 | SOX2 |
| 7157 SFSWAP   | SOX2 regulated genes in Keratinocyte Overexpression from PMID: 30772301 | SOX2 |
| 7158 ARF6     | SOX2 regulated genes in Keratinocyte Overexpression from PMID: 30772301 | SOX2 |
| 7159 GSK3B    | SOX2 regulated genes in Keratinocyte Overexpression from PMID: 30772301 | SOX2 |
| 7160 SMYD3    | SOX2 regulated genes in Keratinocyte Overexpression from PMID: 30772301 | SOX2 |
| 7161 VPS53    | SOX2 regulated genes in Keratinocyte Overexpression from PMID: 30772301 | SOX2 |
| 7162 FBXO41   | SOX2 regulated genes in Keratinocyte Overexpression from PMID: 30772301 | SOX2 |
| 7163 VPS26B   | SOX2 regulated genes in Keratinocyte Overexpression from PMID: 30772301 | SOX2 |
| 7164 CNOT3    | SOX2 regulated genes in Keratinocyte Overexpression from PMID: 30772301 | SOX2 |
| 7165 SEC61A1  | SOX2 regulated genes in Keratinocyte Overexpression from PMID: 30772301 | SOX2 |
| 7166 FBXW11   | SOX2 regulated genes in Keratinocyte Overexpression from PMID: 30772301 | SOX2 |
| 7167 DUSP10   | SOX2 regulated genes in Keratinocyte Overexpression from PMID: 30772301 | SOX2 |
| 7168 PPP1R13L | SOX2 regulated genes in Keratinocyte Overexpression from PMID: 30772301 | SOX2 |
| 7169 ZFYVE27  | SOX2 regulated genes in Keratinocyte Overexpression from PMID: 30772301 | SOX2 |
| 7170 BDP1     | SOX2 regulated genes in Keratinocyte Overexpression from PMID: 30772301 | SOX2 |
| 7171 PDE6G    | SOX2 regulated genes in Keratinocyte Overexpression from PMID: 30772301 | SOX2 |
| 7172 KLF16    | SOX2 regulated genes in Keratinocyte Overexpression from PMID: 30772301 | SOX2 |
| 7173 GPR19    | SOX2 regulated genes in Keratinocyte Overexpression from PMID: 30772301 | SOX2 |
| 7174 RBM33    | SOX2 regulated genes in Keratinocyte Overexpression from PMID: 30772301 | SOX2 |
| 7175 WDR55    | SOX2 regulated genes in Keratinocyte Overexpression from PMID: 30772301 | SOX2 |
| 7176 ZBTB7A   | SOX2 regulated genes in Keratinocyte Overexpression from PMID: 30772301 | SOX2 |
| 7177 RBBP4    | SOX2 regulated genes in Keratinocyte Overexpression from PMID: 30772301 | SOX2 |
| 7178 SNRPE    | SOX2 regulated genes in Keratinocyte Overexpression from PMID: 30772301 | SOX2 |
| 7179 MRPL24   | SOX2 regulated genes in Keratinocyte Overexpression from PMID: 30772301 | SOX2 |
| 7180 PPHLN1   | SOX2 regulated genes in Keratinocyte Overexpression from PMID: 30772301 | SOX2 |
| 7181 PCDH1    | SOX2 regulated genes in Keratinocyte Overexpression from PMID: 30772301 | SOX2 |
| 7182 RUNC1    | SOX2 regulated genes in Keratinocyte Overexpression from PMID: 30772301 | SOX2 |
| 7183 YBX2     | SOX2 regulated genes in Keratinocyte Overexpression from PMID: 30772301 | SOX2 |
| 7184 VPS9D1   | SOX2 regulated genes in Keratinocyte Overexpression from PMID: 30772301 | SOX2 |
| 7185 RTCA     | SOX2 regulated genes in Keratinocyte Overexpression from PMID: 30772301 | SOX2 |
| 7186 HOXA5    | SOX2 regulated genes in Keratinocyte Overexpression from PMID: 30772301 | SOX2 |
| 7187 RGL2     | SOX2 regulated genes in Keratinocyte Overexpression from PMID: 30772301 | SOX2 |
| 7188 VIPAS39  | SOX2 regulated genes in Keratinocyte Overexpression from PMID: 30772301 | SOX2 |
| 7189 SWT1     | SOX2 regulated genes in Keratinocyte Overexpression from PMID: 30772301 | SOX2 |
| 7190 ATP5F1B  | SOX2 regulated genes in Keratinocyte Overexpression from PMID: 30772301 | SOX2 |
| 7191 DNMT1    | SOX2 regulated genes in Keratinocyte Overexpression from PMID: 30772301 | SOX2 |
| 7192 SENP5    | SOX2 regulated genes in Keratinocyte Overexpression from PMID: 30772301 | SOX2 |
| 7193 CLDN1    | SOX2 regulated genes in Keratinocyte Overexpression from PMID: 30772301 | SOX2 |
| 7194 ABCB11   | SOX2 regulated genes in Keratinocyte Overexpression from PMID: 30772301 | SOX2 |
| 7195 SCRIN2   | SOX2 regulated genes in Keratinocyte Overexpression from PMID: 30772301 | SOX2 |
| 7196 DLEC1    | SOX2 regulated genes in Keratinocyte Overexpression from PMID: 30772301 | SOX2 |



|      |         |                                                                         |      |
|------|---------|-------------------------------------------------------------------------|------|
| 7197 | TEPSIN  | SOX2 regulated genes in Keratinocyte Overexpression from PMID: 30772301 | SOX2 |
| 7198 | UBE2F   | SOX2 regulated genes in Keratinocyte Overexpression from PMID: 30772301 | SOX2 |
| 7199 | ACVR2A  | SOX2 regulated genes in Keratinocyte Overexpression from PMID: 30772301 | SOX2 |
| 7200 | BSDC1   | SOX2 regulated genes in Keratinocyte Overexpression from PMID: 30772301 | SOX2 |
| 7201 | KIF3C   | SOX2 regulated genes in Keratinocyte Overexpression from PMID: 30772301 | SOX2 |
| 7202 | ZNF280D | SOX2 regulated genes in Keratinocyte Overexpression from PMID: 30772301 | SOX2 |
| 7203 | VPS25   | SOX2 regulated genes in Keratinocyte Overexpression from PMID: 30772301 | SOX2 |
| 7204 | BLM     | SOX2 regulated genes in Keratinocyte Overexpression from PMID: 30772301 | SOX2 |
| 7205 | NMD3    | SOX2 regulated genes in Keratinocyte Overexpression from PMID: 30772301 | SOX2 |
| 7206 | NTF4    | SOX2 regulated genes in Keratinocyte Overexpression from PMID: 30772301 | SOX2 |
| 7207 | ZNF653  | SOX2 regulated genes in Keratinocyte Overexpression from PMID: 30772301 | SOX2 |
| 7208 | PRMT6   | SOX2 regulated genes in Keratinocyte Overexpression from PMID: 30772301 | SOX2 |
| 7209 | ATOX1   | SOX2 regulated genes in Keratinocyte Overexpression from PMID: 30772301 | SOX2 |
| 7210 | ZNF691  | SOX2 regulated genes in Keratinocyte Overexpression from PMID: 30772301 | SOX2 |
| 7211 | JUN     | SOX2 regulated genes in Keratinocyte Overexpression from PMID: 30772301 | SOX2 |
| 7212 | MTMR4   | SOX2 regulated genes in Keratinocyte Overexpression from PMID: 30772301 | SOX2 |
| 7213 | MRPL4   | SOX2 regulated genes in Keratinocyte Overexpression from PMID: 30772301 | SOX2 |
| 7214 | USP5    | SOX2 regulated genes in Keratinocyte Overexpression from PMID: 30772301 | SOX2 |
| 7215 | MCOLN3  | SOX2 regulated genes in Keratinocyte Overexpression from PMID: 30772301 | SOX2 |
| 7216 | HNRNPR  | SOX2 regulated genes in Keratinocyte Overexpression from PMID: 30772301 | SOX2 |
| 7217 | DAPK3   | SOX2 regulated genes in Keratinocyte Overexpression from PMID: 30772301 | SOX2 |
| 7218 | CTXN1   | SOX2 regulated genes in Keratinocyte Overexpression from PMID: 30772301 | SOX2 |
| 7219 | CACNB3  | SOX2 regulated genes in Keratinocyte Overexpression from PMID: 30772301 | SOX2 |
| 7220 | SLC45A3 | SOX2 regulated genes in Keratinocyte Overexpression from PMID: 30772301 | SOX2 |
| 7221 | TRIM45  | SOX2 regulated genes in Keratinocyte Overexpression from PMID: 30772301 | SOX2 |
| 7222 | PHYHIP  | SOX2 regulated genes in Keratinocyte Overexpression from PMID: 30772301 | SOX2 |
| 7223 | TAF6    | SOX2 regulated genes in Keratinocyte Overexpression from PMID: 30772301 | SOX2 |
| 7224 | ZNF329  | SOX2 regulated genes in Keratinocyte Overexpression from PMID: 30772301 | SOX2 |
| 7225 | ERF     | SOX2 regulated genes in Keratinocyte Overexpression from PMID: 30772301 | SOX2 |
| 7226 | NUP42   | SOX2 regulated genes in Keratinocyte Overexpression from PMID: 30772301 | SOX2 |
| 7227 | PIGF    | SOX2 regulated genes in Keratinocyte Overexpression from PMID: 30772301 | SOX2 |
| 7228 | RIMS1   | SOX2 regulated genes in Keratinocyte Overexpression from PMID: 30772301 | SOX2 |
| 7229 | FAM20A  | SOX2 regulated genes in Keratinocyte Overexpression from PMID: 30772301 | SOX2 |
| 7230 | EIF5B   | SOX2 regulated genes in Keratinocyte Overexpression from PMID: 30772301 | SOX2 |
| 7231 | MXD1    | SOX2 regulated genes in Keratinocyte Overexpression from PMID: 30772301 | SOX2 |
| 7232 | RGMA    | SOX2 regulated genes in Keratinocyte Overexpression from PMID: 30772301 | SOX2 |
| 7233 | RYBP    | SOX2 regulated genes in Keratinocyte Overexpression from PMID: 30772301 | SOX2 |
| 7234 | NME7    | SOX2 regulated genes in Keratinocyte Overexpression from PMID: 30772301 | SOX2 |
| 7235 | NUP43   | SOX2 regulated genes in Keratinocyte Overexpression from PMID: 30772301 | SOX2 |
| 7236 | MLX     | SOX2 regulated genes in Keratinocyte Overexpression from PMID: 30772301 | SOX2 |
| 7237 | CCS     | SOX2 regulated genes in Keratinocyte Overexpression from PMID: 30772301 | SOX2 |
| 7238 | PSMB3   | SOX2 regulated genes in Keratinocyte Overexpression from PMID: 30772301 | SOX2 |
| 7239 | CBARP   | SOX2 regulated genes in Keratinocyte Overexpression from PMID: 30772301 | SOX2 |
| 7240 | USP2    | SOX2 regulated genes in Keratinocyte Overexpression from PMID: 30772301 | SOX2 |
| 7241 | ITGA10  | SOX2 regulated genes in Keratinocyte Overexpression from PMID: 30772301 | SOX2 |
| 7242 | VPS72   | SOX2 regulated genes in Keratinocyte Overexpression from PMID: 30772301 | SOX2 |
| 7243 | PGBD1   | SOX2 regulated genes in Keratinocyte Overexpression from PMID: 30772301 | SOX2 |
| 7244 | SDE2    | SOX2 regulated genes in Keratinocyte Overexpression from PMID: 30772301 | SOX2 |
| 7245 | TSR3    | SOX2 regulated genes in Keratinocyte Overexpression from PMID: 30772301 | SOX2 |
| 7246 | KHDRBS1 | SOX2 regulated genes in Keratinocyte Overexpression from PMID: 30772301 | SOX2 |
| 7247 | COX10   | SOX2 regulated genes in Keratinocyte Overexpression from PMID: 30772301 | SOX2 |
| 7248 | EMP2    | SOX2 regulated genes in Keratinocyte Overexpression from PMID: 30772301 | SOX2 |
| 7249 | SIRT7   | SOX2 regulated genes in Keratinocyte Overexpression from PMID: 30772301 | SOX2 |
| 7250 | IFNLR1  | SOX2 regulated genes in Keratinocyte Overexpression from PMID: 30772301 | SOX2 |
| 7251 | LARP4B  | SOX2 regulated genes in Keratinocyte Overexpression from PMID: 30772301 | SOX2 |
| 7252 | ANKRD11 | SOX2 regulated genes in Keratinocyte Overexpression from PMID: 30772301 | SOX2 |
| 7253 | FOXP1   | SOX2 regulated genes in Keratinocyte Overexpression from PMID: 30772301 | SOX2 |
| 7254 | WNT5B   | SOX2 regulated genes in Keratinocyte Overexpression from PMID: 30772301 | SOX2 |
| 7255 | FAM214A | SOX2 regulated genes in Keratinocyte Overexpression from PMID: 30772301 | SOX2 |
| 7256 | STK19   | SOX2 regulated genes in Keratinocyte Overexpression from PMID: 30772301 | SOX2 |
| 7257 | EGR1    | SOX2 regulated genes in Keratinocyte Overexpression from PMID: 30772301 | SOX2 |

|      |          |                                                                         |      |
|------|----------|-------------------------------------------------------------------------|------|
| 7258 | ZC3H8    | SOX2 regulated genes in Keratinocyte Overexpression from PMID: 30772301 | SOX2 |
| 7259 | GEMIN4   | SOX2 regulated genes in Keratinocyte Overexpression from PMID: 30772301 | SOX2 |
| 7260 | FABP12   | SOX2 regulated genes in Keratinocyte Overexpression from PMID: 30772301 | SOX2 |
| 7261 | MYH15    | SOX2 regulated genes in Keratinocyte Overexpression from PMID: 30772301 | SOX2 |
| 7262 | SERPINI1 | SOX2 regulated genes in Keratinocyte Overexpression from PMID: 30772301 | SOX2 |
| 7263 | DCTN1    | SOX2 regulated genes in Keratinocyte Overexpression from PMID: 30772301 | SOX2 |
| 7264 | LLPH     | SOX2 regulated genes in Keratinocyte Overexpression from PMID: 30772301 | SOX2 |
| 7265 | SNAPC3   | SOX2 regulated genes in Keratinocyte Overexpression from PMID: 30772301 | SOX2 |
| 7266 | POU4F3   | SOX2 regulated genes in Keratinocyte Overexpression from PMID: 30772301 | SOX2 |
| 7267 | GRSF1    | SOX2 regulated genes in Keratinocyte Overexpression from PMID: 30772301 | SOX2 |
| 7268 | PRKAB1   | SOX2 regulated genes in Keratinocyte Overexpression from PMID: 30772301 | SOX2 |
| 7269 | ACTR8    | SOX2 regulated genes in Keratinocyte Overexpression from PMID: 30772301 | SOX2 |
| 7270 | CAMK2N1  | SOX2 regulated genes in Keratinocyte Overexpression from PMID: 30772301 | SOX2 |
| 7271 | SRSF4    | SOX2 regulated genes in Keratinocyte Overexpression from PMID: 30772301 | SOX2 |
| 7272 | ZNF512   | SOX2 regulated genes in Keratinocyte Overexpression from PMID: 30772301 | SOX2 |
| 7273 | GDPD1    | SOX2 regulated genes in Keratinocyte Overexpression from PMID: 30772301 | SOX2 |
| 7274 | SIRT1    | SOX2 regulated genes in Keratinocyte Overexpression from PMID: 30772301 | SOX2 |
| 7275 | NUP133   | SOX2 regulated genes in Keratinocyte Overexpression from PMID: 30772301 | SOX2 |
| 7276 | MKNK2    | SOX2 regulated genes in Keratinocyte Overexpression from PMID: 30772301 | SOX2 |
| 7277 | WDR53    | SOX2 regulated genes in Keratinocyte Overexpression from PMID: 30772301 | SOX2 |
| 7278 | MAPKBP1  | SOX2 regulated genes in Keratinocyte Overexpression from PMID: 30772301 | SOX2 |
| 7279 | SIRT4    | SOX2 regulated genes in Keratinocyte Overexpression from PMID: 30772301 | SOX2 |
| 7280 | PHB      | SOX2 regulated genes in Keratinocyte Overexpression from PMID: 30772301 | SOX2 |
| 7281 | MACF1    | SOX2 regulated genes in Keratinocyte Overexpression from PMID: 30772301 | SOX2 |
| 7282 | TSG101   | SOX2 regulated genes in Keratinocyte Overexpression from PMID: 30772301 | SOX2 |
| 7283 | RNF208   | SOX2 regulated genes in Keratinocyte Overexpression from PMID: 30772301 | SOX2 |
| 7284 | ARHGAP22 | SOX2 regulated genes in Keratinocyte Overexpression from PMID: 30772301 | SOX2 |
| 7285 | GCDH     | SOX2 regulated genes in Keratinocyte Overexpression from PMID: 30772301 | SOX2 |
| 7286 | SDF2     | SOX2 regulated genes in Keratinocyte Overexpression from PMID: 30772301 | SOX2 |
| 7287 | TKFC     | SOX2 regulated genes in Keratinocyte Overexpression from PMID: 30772301 | SOX2 |
| 7288 | MZT2A    | SOX2 regulated genes in Keratinocyte Overexpression from PMID: 30772301 | SOX2 |
| 7289 | MZT2B    | SOX2 regulated genes in Keratinocyte Overexpression from PMID: 30772301 | SOX2 |
| 7290 | EPN1     | SOX2 regulated genes in Keratinocyte Overexpression from PMID: 30772301 | SOX2 |
| 7291 | DHODH    | SOX2 regulated genes in Keratinocyte Overexpression from PMID: 30772301 | SOX2 |
| 7292 | TBCA     | SOX2 regulated genes in Keratinocyte Overexpression from PMID: 30772301 | SOX2 |
| 7293 | MFSD2B   | SOX2 regulated genes in Keratinocyte Overexpression from PMID: 30772301 | SOX2 |
| 7294 | MTX1     | SOX2 regulated genes in Keratinocyte Overexpression from PMID: 30772301 | SOX2 |
| 7295 | DCUN1D5  | SOX2 regulated genes in Keratinocyte Overexpression from PMID: 30772301 | SOX2 |
| 7296 | NINJ2    | SOX2 regulated genes in Keratinocyte Overexpression from PMID: 30772301 | SOX2 |
| 7297 | RHOU     | SOX2 regulated genes in Keratinocyte Overexpression from PMID: 30772301 | SOX2 |
| 7298 | PPIP5K1  | SOX2 regulated genes in Keratinocyte Overexpression from PMID: 30772301 | SOX2 |
| 7299 | RPS15    | SOX2 regulated genes in Keratinocyte Overexpression from PMID: 30772301 | SOX2 |
| 7300 | FBXL18   | SOX2 regulated genes in Keratinocyte Overexpression from PMID: 30772301 | SOX2 |
| 7301 | FCAMR    | SOX2 regulated genes in Keratinocyte Overexpression from PMID: 30772301 | SOX2 |
| 7302 | ALKBH7   | SOX2 regulated genes in Keratinocyte Overexpression from PMID: 30772301 | SOX2 |
| 7303 | C1orf109 | SOX2 regulated genes in Keratinocyte Overexpression from PMID: 30772301 | SOX2 |
| 7304 | ZNF800   | SOX2 regulated genes in Keratinocyte Overexpression from PMID: 30772301 | SOX2 |
| 7305 | USH2A    | SOX2 regulated genes in Keratinocyte Overexpression from PMID: 30772301 | SOX2 |
| 7306 | AXDND1   | SOX2 regulated genes in Keratinocyte Overexpression from PMID: 30772301 | SOX2 |
| 7307 | TIMM22   | SOX2 regulated genes in Keratinocyte Overexpression from PMID: 30772301 | SOX2 |
| 7308 | C1orf35  | SOX2 regulated genes in Keratinocyte Overexpression from PMID: 30772301 | SOX2 |
| 7309 | PRKCQ    | SOX2 regulated genes in Keratinocyte Overexpression from PMID: 30772301 | SOX2 |
| 7310 | MIGA1    | SOX2 regulated genes in Keratinocyte Overexpression from PMID: 30772301 | SOX2 |
| 7311 | PDXDC1   | SOX2 regulated genes in Keratinocyte Overexpression from PMID: 30772301 | SOX2 |
| 7312 | PTOV1    | SOX2 regulated genes in Keratinocyte Overexpression from PMID: 30772301 | SOX2 |
| 7313 | NFATC2IP | SOX2 regulated genes in Keratinocyte Overexpression from PMID: 30772301 | SOX2 |
| 7314 | STRIP1   | SOX2 regulated genes in Keratinocyte Overexpression from PMID: 30772301 | SOX2 |
| 7315 | MEX3D    | SOX2 regulated genes in Keratinocyte Overexpression from PMID: 30772301 | SOX2 |
| 7316 | ASB7     | SOX2 regulated genes in Keratinocyte Overexpression from PMID: 30772301 | SOX2 |
| 7317 | PRSS22   | SOX2 regulated genes in Keratinocyte Overexpression from PMID: 30772301 | SOX2 |
| 7318 | HGS      | SOX2 regulated genes in Keratinocyte Overexpression from PMID: 30772301 | SOX2 |

|               |                                                                         |      |
|---------------|-------------------------------------------------------------------------|------|
| 7319 NKIRAS2  | SOX2 regulated genes in Keratinocyte Overexpression from PMID: 30772301 | SOX2 |
| 7320 MGST3    | SOX2 regulated genes in Keratinocyte Overexpression from PMID: 30772301 | SOX2 |
| 7321 CAPN10   | SOX2 regulated genes in Keratinocyte Overexpression from PMID: 30772301 | SOX2 |
| 7322 EME1     | SOX2 regulated genes in Keratinocyte Overexpression from PMID: 30772301 | SOX2 |
| 7323 DLG1     | SOX2 regulated genes in Keratinocyte Overexpression from PMID: 30772301 | SOX2 |
| 7324 SHH      | SOX2 regulated genes in Keratinocyte Overexpression from PMID: 30772301 | SOX2 |
| 7325 PRPF3    | SOX2 regulated genes in Keratinocyte Overexpression from PMID: 30772301 | SOX2 |
| 7326 DUS3L    | SOX2 regulated genes in Keratinocyte Overexpression from PMID: 30772301 | SOX2 |
| 7327 FAT2     | SOX2 regulated genes in Keratinocyte Overexpression from PMID: 30772301 | SOX2 |
| 7328 PDHB     | SOX2 regulated genes in Keratinocyte Overexpression from PMID: 30772301 | SOX2 |
| 7329 TOMM40   | SOX2 regulated genes in Keratinocyte Overexpression from PMID: 30772301 | SOX2 |
| 7330 ORC1     | SOX2 regulated genes in Keratinocyte Overexpression from PMID: 30772301 | SOX2 |
| 7331 SLC44A2  | SOX2 regulated genes in Keratinocyte Overexpression from PMID: 30772301 | SOX2 |
| 7332 MRPS5    | SOX2 regulated genes in Keratinocyte Overexpression from PMID: 30772301 | SOX2 |
| 7333 TFAP2E   | SOX2 regulated genes in Keratinocyte Overexpression from PMID: 30772301 | SOX2 |
| 7334 KIF2A    | SOX2 regulated genes in Keratinocyte Overexpression from PMID: 30772301 | SOX2 |
| 7335 TADA3    | SOX2 regulated genes in Keratinocyte Overexpression from PMID: 30772301 | SOX2 |
| 7336 RRP8     | SOX2 regulated genes in Keratinocyte Overexpression from PMID: 30772301 | SOX2 |
| 7337 PFDN2    | SOX2 regulated genes in Keratinocyte Overexpression from PMID: 30772301 | SOX2 |
| 7338 ZNF513   | SOX2 regulated genes in Keratinocyte Overexpression from PMID: 30772301 | SOX2 |
| 7339 B3GNTL1  | SOX2 regulated genes in Keratinocyte Overexpression from PMID: 30772301 | SOX2 |
| 7340 S100A2   | SOX2 regulated genes in Keratinocyte Overexpression from PMID: 30772301 | SOX2 |
| 7341 LRIG3    | SOX2 regulated genes in Keratinocyte Overexpression from PMID: 30772301 | SOX2 |
| 7342 LUZP1    | SOX2 regulated genes in Keratinocyte Overexpression from PMID: 30772301 | SOX2 |
| 7343 C8orf58  | SOX2 regulated genes in Keratinocyte Overexpression from PMID: 30772301 | SOX2 |
| 7344 SSR2     | SOX2 regulated genes in Keratinocyte Overexpression from PMID: 30772301 | SOX2 |
| 7345 CDC42BPA | SOX2 regulated genes in Keratinocyte Overexpression from PMID: 30772301 | SOX2 |
| 7346 USP40    | SOX2 regulated genes in Keratinocyte Overexpression from PMID: 30772301 | SOX2 |
| 7347 SLC5A10  | SOX2 regulated genes in Keratinocyte Overexpression from PMID: 30772301 | SOX2 |
| 7348 SMG6     | SOX2 regulated genes in Keratinocyte Overexpression from PMID: 30772301 | SOX2 |
| 7349 EFCAB5   | SOX2 regulated genes in Keratinocyte Overexpression from PMID: 30772301 | SOX2 |
| 7350 ATP1B1   | SOX2 regulated genes in Keratinocyte Overexpression from PMID: 30772301 | SOX2 |
| 7351 DENND5B  | SOX2 regulated genes in Keratinocyte Overexpression from PMID: 30772301 | SOX2 |
| 7352 CNOT6L   | SOX2 regulated genes in Keratinocyte Overexpression from PMID: 30772301 | SOX2 |
| 7353 LIMA1    | SOX2 regulated genes in Keratinocyte Overexpression from PMID: 30772301 | SOX2 |
| 7354 EFNA4    | SOX2 regulated genes in Keratinocyte Overexpression from PMID: 30772301 | SOX2 |
| 7355 RAF1     | SOX2 regulated genes in Keratinocyte Overexpression from PMID: 30772301 | SOX2 |
| 7356 CRIPT    | SOX2 regulated genes in Keratinocyte Overexpression from PMID: 30772301 | SOX2 |
| 7357 TBCEL    | SOX2 regulated genes in Keratinocyte Overexpression from PMID: 30772301 | SOX2 |
| 7358 NIPAL4   | SOX2 regulated genes in Keratinocyte Overexpression from PMID: 30772301 | SOX2 |
| 7359 LRRC14   | SOX2 regulated genes in Keratinocyte Overexpression from PMID: 30772301 | SOX2 |
| 7360 TMEM40   | SOX2 regulated genes in Keratinocyte Overexpression from PMID: 30772301 | SOX2 |
| 7361 GRM3     | SOX2 regulated genes in Keratinocyte Overexpression from PMID: 30772301 | SOX2 |
| 7362 DDX46    | SOX2 regulated genes in Keratinocyte Overexpression from PMID: 30772301 | SOX2 |
| 7363 SLC16A10 | SOX2 regulated genes in Keratinocyte Overexpression from PMID: 30772301 | SOX2 |
| 7364 AURKC    | SOX2 regulated genes in Keratinocyte Overexpression from PMID: 30772301 | SOX2 |
| 7365 PASK     | SOX2 regulated genes in Keratinocyte Overexpression from PMID: 30772301 | SOX2 |
| 7366 LARP4    | SOX2 regulated genes in Keratinocyte Overexpression from PMID: 30772301 | SOX2 |
| 7367 PARD3B   | SOX2 regulated genes in Keratinocyte Overexpression from PMID: 30772301 | SOX2 |
| 7368 HJURP    | SOX2 regulated genes in Keratinocyte Overexpression from PMID: 30772301 | SOX2 |
| 7369 TBCB     | SOX2 regulated genes in Keratinocyte Overexpression from PMID: 30772301 | SOX2 |
| 7370 PGAP1    | SOX2 regulated genes in Keratinocyte Overexpression from PMID: 30772301 | SOX2 |
| 7371 PSMA5    | SOX2 regulated genes in Keratinocyte Overexpression from PMID: 30772301 | SOX2 |
| 7372 SLC27A6  | SOX2 regulated genes in Keratinocyte Overexpression from PMID: 30772301 | SOX2 |
| 7373 ETV3     | SOX2 regulated genes in Keratinocyte Overexpression from PMID: 30772301 | SOX2 |
| 7374 RBM8A    | SOX2 regulated genes in Keratinocyte Overexpression from PMID: 30772301 | SOX2 |
| 7375 MEGF11   | SOX2 regulated genes in Keratinocyte Overexpression from PMID: 30772301 | SOX2 |
| 7376 IQGAP3   | SOX2 regulated genes in Keratinocyte Overexpression from PMID: 30772301 | SOX2 |
| 7377 TSEN34   | SOX2 regulated genes in Keratinocyte Overexpression from PMID: 30772301 | SOX2 |
| 7378 PHF13    | SOX2 regulated genes in Keratinocyte Overexpression from PMID: 30772301 | SOX2 |
| 7379 TARS2    | SOX2 regulated genes in Keratinocyte Overexpression from PMID: 30772301 | SOX2 |

|               |                                                                         |      |
|---------------|-------------------------------------------------------------------------|------|
| 7380 FYTDD1   | SOX2 regulated genes in Keratinocyte Overexpression from PMID: 30772301 | SOX2 |
| 7381 ZKSCAN4  | SOX2 regulated genes in Keratinocyte Overexpression from PMID: 30772301 | SOX2 |
| 7382 SNX16    | SOX2 regulated genes in Keratinocyte Overexpression from PMID: 30772301 | SOX2 |
| 7383 PFN2     | SOX2 regulated genes in Keratinocyte Overexpression from PMID: 30772301 | SOX2 |
| 7384 RNF32    | SOX2 regulated genes in Keratinocyte Overexpression from PMID: 30772301 | SOX2 |
| 7385 DISP2    | SOX2 regulated genes in Keratinocyte Overexpression from PMID: 30772301 | SOX2 |
| 7386 RIF1     | SOX2 regulated genes in Keratinocyte Overexpression from PMID: 30772301 | SOX2 |
| 7387 SH2B1    | SOX2 regulated genes in Keratinocyte Overexpression from PMID: 30772301 | SOX2 |
| 7388 TLK2     | SOX2 regulated genes in Keratinocyte Overexpression from PMID: 30772301 | SOX2 |
| 7389 PSMB6    | SOX2 regulated genes in Keratinocyte Overexpression from PMID: 30772301 | SOX2 |
| 7390 BEAN1    | SOX2 regulated genes in Keratinocyte Overexpression from PMID: 30772301 | SOX2 |
| 7391 TRMT112  | SOX2 regulated genes in Keratinocyte Overexpression from PMID: 30772301 | SOX2 |
| 7392 TARBP1   | SOX2 regulated genes in Keratinocyte Overexpression from PMID: 30772301 | SOX2 |
| 7393 COQ10B   | SOX2 regulated genes in Keratinocyte Overexpression from PMID: 30772301 | SOX2 |
| 7394 SHF      | SOX2 regulated genes in Keratinocyte Overexpression from PMID: 30772301 | SOX2 |
| 7395 USF1     | SOX2 regulated genes in Keratinocyte Overexpression from PMID: 30772301 | SOX2 |
| 7396 RPGRIP1L | SOX2 regulated genes in Keratinocyte Overexpression from PMID: 30772301 | SOX2 |
| 7397 AXIN2    | SOX2 regulated genes in Keratinocyte Overexpression from PMID: 30772301 | SOX2 |
| 7398 LIN37    | SOX2 regulated genes in Keratinocyte Overexpression from PMID: 30772301 | SOX2 |
| 7399 INAFM2   | SOX2 regulated genes in Keratinocyte Overexpression from PMID: 30772301 | SOX2 |
| 7400 PSMB4    | SOX2 regulated genes in Keratinocyte Overexpression from PMID: 30772301 | SOX2 |
| 7401 ABCG4    | SOX2 regulated genes in Keratinocyte Overexpression from PMID: 30772301 | SOX2 |
| 7402 NUCKS1   | SOX2 regulated genes in Keratinocyte Overexpression from PMID: 30772301 | SOX2 |
| 7403 MKRN2OS  | SOX2 regulated genes in Keratinocyte Overexpression from PMID: 30772301 | SOX2 |
| 7404 HIP1R    | SOX2 regulated genes in Keratinocyte Overexpression from PMID: 30772301 | SOX2 |
| 7405 METTL8   | SOX2 regulated genes in Keratinocyte Overexpression from PMID: 30772301 | SOX2 |
| 7406 IQCC     | SOX2 regulated genes in Keratinocyte Overexpression from PMID: 30772301 | SOX2 |
| 7407 CLDN7    | SOX2 regulated genes in Keratinocyte Overexpression from PMID: 30772301 | SOX2 |
| 7408 TCEA1    | SOX2 regulated genes in Keratinocyte Overexpression from PMID: 30772301 | SOX2 |
| 7409 KLC3     | SOX2 regulated genes in Keratinocyte Overexpression from PMID: 30772301 | SOX2 |
| 7410 DPH5     | SOX2 regulated genes in Keratinocyte Overexpression from PMID: 30772301 | SOX2 |
| 7411 PCBP2    | SOX2 regulated genes in Keratinocyte Overexpression from PMID: 30772301 | SOX2 |
| 7412 NOL6     | SOX2 regulated genes in Keratinocyte Overexpression from PMID: 30772301 | SOX2 |
| 7413 OOEPE    | SOX2 regulated genes in Keratinocyte Overexpression from PMID: 30772301 | SOX2 |
| 7414 NMT1     | SOX2 regulated genes in Keratinocyte Overexpression from PMID: 30772301 | SOX2 |
| 7415 HR       | SOX2 regulated genes in Keratinocyte Overexpression from PMID: 30772301 | SOX2 |
| 7416 DROSHA   | SOX2 regulated genes in Keratinocyte Overexpression from PMID: 30772301 | SOX2 |
| 7417 PELP1    | SOX2 regulated genes in Keratinocyte Overexpression from PMID: 30772301 | SOX2 |
| 7418 SPRR4    | SOX2 regulated genes in Keratinocyte Overexpression from PMID: 30772301 | SOX2 |
| 7419 SNAPC4   | SOX2 regulated genes in Keratinocyte Overexpression from PMID: 30772301 | SOX2 |
| 7420 TAF1C    | SOX2 regulated genes in Keratinocyte Overexpression from PMID: 30772301 | SOX2 |
| 7421 CGNL1    | SOX2 regulated genes in Keratinocyte Overexpression from PMID: 30772301 | SOX2 |
| 7422 WDR83OS  | SOX2 regulated genes in Keratinocyte Overexpression from PMID: 30772301 | SOX2 |
| 7423 DUSP16   | SOX2 regulated genes in Keratinocyte Overexpression from PMID: 30772301 | SOX2 |
| 7424 THOP1    | SOX2 regulated genes in Keratinocyte Overexpression from PMID: 30772301 | SOX2 |
| 7425 SUS4     | SOX2 regulated genes in Keratinocyte Overexpression from PMID: 30772301 | SOX2 |
| 7426 CDC42SE1 | SOX2 regulated genes in Keratinocyte Overexpression from PMID: 30772301 | SOX2 |
| 7427 MFF      | SOX2 regulated genes in Keratinocyte Overexpression from PMID: 30772301 | SOX2 |
| 7428 IER5     | SOX2 regulated genes in Keratinocyte Overexpression from PMID: 30772301 | SOX2 |
| 7429 RAD21    | SOX2 regulated genes in Keratinocyte Overexpression from PMID: 30772301 | SOX2 |
| 7430 SETD5    | SOX2 regulated genes in Keratinocyte Overexpression from PMID: 30772301 | SOX2 |
| 7431 MBTPS1   | SOX2 regulated genes in Keratinocyte Overexpression from PMID: 30772301 | SOX2 |
| 7432 REXO1    | SOX2 regulated genes in Keratinocyte Overexpression from PMID: 30772301 | SOX2 |
| 7433 SRPRB    | SOX2 regulated genes in Keratinocyte Overexpression from PMID: 30772301 | SOX2 |
| 7434 AKTIP    | SOX2 regulated genes in Keratinocyte Overexpression from PMID: 30772301 | SOX2 |
| 7435 RNF223   | SOX2 regulated genes in Keratinocyte Overexpression from PMID: 30772301 | SOX2 |
| 7436 TIMM13   | SOX2 regulated genes in Keratinocyte Overexpression from PMID: 30772301 | SOX2 |
| 7437 RABL3    | SOX2 regulated genes in Keratinocyte Overexpression from PMID: 30772301 | SOX2 |
| 7438 XRR1A1   | SOX2 regulated genes in Keratinocyte Overexpression from PMID: 30772301 | SOX2 |
| 7439 PIGL     | SOX2 regulated genes in Keratinocyte Overexpression from PMID: 30772301 | SOX2 |
| 7440 MARCKSL1 | SOX2 regulated genes in Keratinocyte Overexpression from PMID: 30772301 | SOX2 |

|               |                                                                         |      |
|---------------|-------------------------------------------------------------------------|------|
| 7441 PUS7L    | SOX2 regulated genes in Keratinocyte Overexpression from PMID: 30772301 | SOX2 |
| 7442 CCNE2    | SOX2 regulated genes in Keratinocyte Overexpression from PMID: 30772301 | SOX2 |
| 7443 HOOK2    | SOX2 regulated genes in Keratinocyte Overexpression from PMID: 30772301 | SOX2 |
| 7444 HNRNP3   | SOX2 regulated genes in Keratinocyte Overexpression from PMID: 30772301 | SOX2 |
| 7445 LONP1    | SOX2 regulated genes in Keratinocyte Overexpression from PMID: 30772301 | SOX2 |
| 7446 MRPL53   | SOX2 regulated genes in Keratinocyte Overexpression from PMID: 30772301 | SOX2 |
| 7447 ANXA9    | SOX2 regulated genes in Keratinocyte Overexpression from PMID: 30772301 | SOX2 |
| 7448 GALR2    | SOX2 regulated genes in Keratinocyte Overexpression from PMID: 30772301 | SOX2 |
| 7449 PRPF40A  | SOX2 regulated genes in Keratinocyte Overexpression from PMID: 30772301 | SOX2 |
| 7450 TFCP2    | SOX2 regulated genes in Keratinocyte Overexpression from PMID: 30772301 | SOX2 |
| 7451 RING1    | SOX2 regulated genes in Keratinocyte Overexpression from PMID: 30772301 | SOX2 |
| 7452 GBF1     | SOX2 regulated genes in Keratinocyte Overexpression from PMID: 30772301 | SOX2 |
| 7453 CCDC51   | SOX2 regulated genes in Keratinocyte Overexpression from PMID: 30772301 | SOX2 |
| 7454 PDGFA    | SOX2 regulated genes in Keratinocyte Overexpression from PMID: 30772301 | SOX2 |
| 7455 CEP72    | SOX2 regulated genes in Keratinocyte Overexpression from PMID: 30772301 | SOX2 |
| 7456 HCN3     | SOX2 regulated genes in Keratinocyte Overexpression from PMID: 30772301 | SOX2 |
| 7457 TMEM181  | SOX2 regulated genes in Keratinocyte Overexpression from PMID: 30772301 | SOX2 |
| 7458 VSIG10L  | SOX2 regulated genes in Keratinocyte Overexpression from PMID: 30772301 | SOX2 |
| 7459 CUL2     | SOX2 regulated genes in Keratinocyte Overexpression from PMID: 30772301 | SOX2 |
| 7460 TSN      | SOX2 regulated genes in Keratinocyte Overexpression from PMID: 30772301 | SOX2 |
| 7461 NKD1     | SOX2 regulated genes in Keratinocyte Overexpression from PMID: 30772301 | SOX2 |
| 7462 SLC39A14 | SOX2 regulated genes in Keratinocyte Overexpression from PMID: 30772301 | SOX2 |
| 7463 GRM5     | SOX2 regulated genes in Keratinocyte Overexpression from PMID: 30772301 | SOX2 |
| 7464 NIT1     | SOX2 regulated genes in Keratinocyte Overexpression from PMID: 30772301 | SOX2 |
| 7465 DND1     | SOX2 regulated genes in Keratinocyte Overexpression from PMID: 30772301 | SOX2 |
| 7466 LMNTD1   | SOX2 regulated genes in Keratinocyte Overexpression from PMID: 30772301 | SOX2 |
| 7467 CDH1     | SOX2 regulated genes in Keratinocyte Overexpression from PMID: 30772301 | SOX2 |
| 7468 FRS2     | SOX2 regulated genes in Keratinocyte Overexpression from PMID: 30772301 | SOX2 |
| 7469 AP4B1    | SOX2 regulated genes in Keratinocyte Overexpression from PMID: 30772301 | SOX2 |
| 7470 SGK3     | SOX2 regulated genes in Keratinocyte Overexpression from PMID: 30772301 | SOX2 |
| 7471 RAD23A   | SOX2 regulated genes in Keratinocyte Overexpression from PMID: 30772301 | SOX2 |
| 7472 POM121   | SOX2 regulated genes in Keratinocyte Overexpression from PMID: 30772301 | SOX2 |
| 7473 POM121C  | SOX2 regulated genes in Keratinocyte Overexpression from PMID: 30772301 | SOX2 |
| 7474 BRICD5   | SOX2 regulated genes in Keratinocyte Overexpression from PMID: 30772301 | SOX2 |
| 7475 TANC2    | SOX2 regulated genes in Keratinocyte Overexpression from PMID: 30772301 | SOX2 |
| 7476 SLC41A1  | SOX2 regulated genes in Keratinocyte Overexpression from PMID: 30772301 | SOX2 |
| 7477 CACNA2D2 | SOX2 regulated genes in Keratinocyte Overexpression from PMID: 30772301 | SOX2 |
| 7478 RNF157   | SOX2 regulated genes in Keratinocyte Overexpression from PMID: 30772301 | SOX2 |
| 7479 DAP3     | SOX2 regulated genes in Keratinocyte Overexpression from PMID: 30772301 | SOX2 |
| 7480 MAP3K13  | SOX2 regulated genes in Keratinocyte Overexpression from PMID: 30772301 | SOX2 |
| 7481 CNNM4    | SOX2 regulated genes in Keratinocyte Overexpression from PMID: 30772301 | SOX2 |
| 7482 CWC27    | SOX2 regulated genes in Keratinocyte Overexpression from PMID: 30772301 | SOX2 |
| 7483 MRPL55   | SOX2 regulated genes in Keratinocyte Overexpression from PMID: 30772301 | SOX2 |
| 7484 RAI1     | SOX2 regulated genes in Keratinocyte Overexpression from PMID: 30772301 | SOX2 |
| 7485 CCSAP    | SOX2 regulated genes in Keratinocyte Overexpression from PMID: 30772301 | SOX2 |
| 7486 EZH2     | SOX2 regulated genes in Keratinocyte Overexpression from PMID: 30772301 | SOX2 |
| 7487 ARHGAP27 | SOX2 regulated genes in Keratinocyte Overexpression from PMID: 30772301 | SOX2 |
| 7488 SRFBP1   | SOX2 regulated genes in Keratinocyte Overexpression from PMID: 30772301 | SOX2 |
| 7489 TMEM41B  | SOX2 regulated genes in Keratinocyte Overexpression from PMID: 30772301 | SOX2 |
| 7490 QRICH2   | SOX2 regulated genes in Keratinocyte Overexpression from PMID: 30772301 | SOX2 |
| 7491 TNNI1    | SOX2 regulated genes in Keratinocyte Overexpression from PMID: 30772301 | SOX2 |
| 7492 TUBA4A   | SOX2 regulated genes in Keratinocyte Overexpression from PMID: 30772301 | SOX2 |
| 7493 SYNRG    | SOX2 regulated genes in Keratinocyte Overexpression from PMID: 30772301 | SOX2 |
| 7494 RARB     | SOX2 regulated genes in Keratinocyte Overexpression from PMID: 30772301 | SOX2 |
| 7495 HSF4     | SOX2 regulated genes in Keratinocyte Overexpression from PMID: 30772301 | SOX2 |
| 7496 SRSF1    | SOX2 regulated genes in Keratinocyte Overexpression from PMID: 30772301 | SOX2 |
| 7497 DMPK     | SOX2 regulated genes in Keratinocyte Overexpression from PMID: 30772301 | SOX2 |
| 7498 EIF4EBP3 | SOX2 regulated genes in Keratinocyte Overexpression from PMID: 30772301 | SOX2 |
| 7499 C1orf131 | SOX2 regulated genes in Keratinocyte Overexpression from PMID: 30772301 | SOX2 |
| 7500 IL11     | SOX2 regulated genes in Keratinocyte Overexpression from PMID: 30772301 | SOX2 |
| 7501 SAXO2    | SOX2 regulated genes in Keratinocyte Overexpression from PMID: 30772301 | SOX2 |

|               |                                                                         |      |
|---------------|-------------------------------------------------------------------------|------|
| 7502 PNKP     | SOX2 regulated genes in Keratinocyte Overexpression from PMID: 30772301 | SOX2 |
| 7503 C1orf74  | SOX2 regulated genes in Keratinocyte Overexpression from PMID: 30772301 | SOX2 |
| 7504 DVL1     | SOX2 regulated genes in Keratinocyte Overexpression from PMID: 30772301 | SOX2 |
| 7505 SLC19A3  | SOX2 regulated genes in Keratinocyte Overexpression from PMID: 30772301 | SOX2 |
| 7506 PMS1     | SOX2 regulated genes in Keratinocyte Overexpression from PMID: 30772301 | SOX2 |
| 7507 ECI2     | SOX2 regulated genes in Keratinocyte Overexpression from PMID: 30772301 | SOX2 |
| 7508 CDC42EP5 | SOX2 regulated genes in Keratinocyte Overexpression from PMID: 30772301 | SOX2 |
| 7509 DPP9     | SOX2 regulated genes in Keratinocyte Overexpression from PMID: 30772301 | SOX2 |
| 7510 MYL6B    | SOX2 regulated genes in Keratinocyte Overexpression from PMID: 30772301 | SOX2 |
| 7511 DTL      | SOX2 regulated genes in Keratinocyte Overexpression from PMID: 30772301 | SOX2 |
| 7512 PCGF2    | SOX2 regulated genes in Keratinocyte Overexpression from PMID: 30772301 | SOX2 |
| 7513 TAF10    | SOX2 regulated genes in Keratinocyte Overexpression from PMID: 30772301 | SOX2 |
| 7514 PCF11    | SOX2 regulated genes in Keratinocyte Overexpression from PMID: 30772301 | SOX2 |
| 7515 SLC23A3  | SOX2 regulated genes in Keratinocyte Overexpression from PMID: 30772301 | SOX2 |
| 7516 PROSER3  | SOX2 regulated genes in Keratinocyte Overexpression from PMID: 30772301 | SOX2 |
| 7517 SETD6    | SOX2 regulated genes in Keratinocyte Overexpression from PMID: 30772301 | SOX2 |
| 7518 PARL     | SOX2 regulated genes in Keratinocyte Overexpression from PMID: 30772301 | SOX2 |
| 7519 IFRD2    | SOX2 regulated genes in Keratinocyte Overexpression from PMID: 30772301 | SOX2 |
| 7520 RPL23A   | SOX2 regulated genes in Keratinocyte Overexpression from PMID: 30772301 | SOX2 |
| 7521 LANCL2   | SOX2 regulated genes in Keratinocyte Overexpression from PMID: 30772301 | SOX2 |
| 7522 HBEGF    | SOX2 regulated genes in Keratinocyte Overexpression from PMID: 30772301 | SOX2 |
| 7523 YME1L1   | SOX2 regulated genes in Keratinocyte Overexpression from PMID: 30772301 | SOX2 |
| 7524 THUMPD1  | SOX2 regulated genes in Keratinocyte Overexpression from PMID: 30772301 | SOX2 |
| 7525 MRPL58   | SOX2 regulated genes in Keratinocyte Overexpression from PMID: 30772301 | SOX2 |
| 7526 ANKRD39  | SOX2 regulated genes in Keratinocyte Overexpression from PMID: 30772301 | SOX2 |
| 7527 AUNIP    | SOX2 regulated genes in Keratinocyte Overexpression from PMID: 30772301 | SOX2 |
| 7528 CNST     | SOX2 regulated genes in Keratinocyte Overexpression from PMID: 30772301 | SOX2 |
| 7529 ECSIT    | SOX2 regulated genes in Keratinocyte Overexpression from PMID: 30772301 | SOX2 |
| 7530 RPS27    | SOX2 regulated genes in Keratinocyte Overexpression from PMID: 30772301 | SOX2 |
| 7531 GRIN2A   | SOX2 regulated genes in Keratinocyte Overexpression from PMID: 30772301 | SOX2 |
| 7532 HDGF     | SOX2 regulated genes in Keratinocyte Overexpression from PMID: 30772301 | SOX2 |
| 7533 F12      | SOX2 regulated genes in Keratinocyte Overexpression from PMID: 30772301 | SOX2 |
| 7534 SIK3     | SOX2 regulated genes in Keratinocyte Overexpression from PMID: 30772301 | SOX2 |
| 7535 GLOD4    | SOX2 regulated genes in Keratinocyte Overexpression from PMID: 30772301 | SOX2 |
| 7536 NDUFAF7  | SOX2 regulated genes in Keratinocyte Overexpression from PMID: 30772301 | SOX2 |
| 7537 MDH2     | SOX2 regulated genes in Keratinocyte Overexpression from PMID: 30772301 | SOX2 |
| 7538 SBNO1    | SOX2 regulated genes in Keratinocyte Overexpression from PMID: 30772301 | SOX2 |
| 7539 GPR42    | SOX2 regulated genes in Keratinocyte Overexpression from PMID: 30772301 | SOX2 |
| 7540 SIN3B    | SOX2 regulated genes in Keratinocyte Overexpression from PMID: 30772301 | SOX2 |
| 7541 ESPNL    | SOX2 regulated genes in Keratinocyte Overexpression from PMID: 30772301 | SOX2 |
| 7542 DHRS9    | SOX2 regulated genes in Keratinocyte Overexpression from PMID: 30772301 | SOX2 |
| 7543 CCDC78   | SOX2 regulated genes in Keratinocyte Overexpression from PMID: 30772301 | SOX2 |
| 7544 GTF2F1   | SOX2 regulated genes in Keratinocyte Overexpression from PMID: 30772301 | SOX2 |
| 7545 DVL2     | SOX2 regulated genes in Keratinocyte Overexpression from PMID: 30772301 | SOX2 |
| 7546 RECQL5   | SOX2 regulated genes in Keratinocyte Overexpression from PMID: 30772301 | SOX2 |
| 7547 TATDN1   | SOX2 regulated genes in Keratinocyte Overexpression from PMID: 30772301 | SOX2 |
| 7548 ALOX12   | SOX2 regulated genes in Keratinocyte Overexpression from PMID: 30772301 | SOX2 |
| 7549 MRPS27   | SOX2 regulated genes in Keratinocyte Overexpression from PMID: 30772301 | SOX2 |
| 7550 LSG1     | SOX2 regulated genes in Keratinocyte Overexpression from PMID: 30772301 | SOX2 |
| 7551 METTL23  | SOX2 regulated genes in Keratinocyte Overexpression from PMID: 30772301 | SOX2 |
| 7552 POGK     | SOX2 regulated genes in Keratinocyte Overexpression from PMID: 30772301 | SOX2 |
| 7553 MRPS22   | SOX2 regulated genes in Keratinocyte Overexpression from PMID: 30772301 | SOX2 |
| 7554 HP1BP3   | SOX2 regulated genes in Keratinocyte Overexpression from PMID: 30772301 | SOX2 |
| 7555 CAPN5    | SOX2 regulated genes in Keratinocyte Overexpression from PMID: 30772301 | SOX2 |
| 7556 SRCAP    | SOX2 regulated genes in Keratinocyte Overexpression from PMID: 30772301 | SOX2 |
| 7557 GTF3C2   | SOX2 regulated genes in Keratinocyte Overexpression from PMID: 30772301 | SOX2 |
| 7558 TMA7     | SOX2 regulated genes in Keratinocyte Overexpression from PMID: 30772301 | SOX2 |
| 7559 PPP1R16A | SOX2 regulated genes in Keratinocyte Overexpression from PMID: 30772301 | SOX2 |
| 7560 HOXB5    | SOX2 regulated genes in Keratinocyte Overexpression from PMID: 30772301 | SOX2 |
| 7561 ENOPH1   | SOX2 regulated genes in Keratinocyte Overexpression from PMID: 30772301 | SOX2 |
| 7562 ZNF146   | SOX2 regulated genes in Keratinocyte Overexpression from PMID: 30772301 | SOX2 |

|                      |                                                                         |      |
|----------------------|-------------------------------------------------------------------------|------|
| 7563 POLR2D          | SOX2 regulated genes in Keratinocyte Overexpression from PMID: 30772301 | SOX2 |
| 7564 DCAF15          | SOX2 regulated genes in Keratinocyte Overexpression from PMID: 30772301 | SOX2 |
| 7565 FAT1            | SOX2 regulated genes in Keratinocyte Overexpression from PMID: 30772301 | SOX2 |
| 7566 SDR16CS         | SOX2 regulated genes in Keratinocyte Overexpression from PMID: 30772301 | SOX2 |
| 7567 TRNT1           | SOX2 regulated genes in Keratinocyte Overexpression from PMID: 30772301 | SOX2 |
| 7568 BCL2L12         | SOX2 regulated genes in Keratinocyte Overexpression from PMID: 30772301 | SOX2 |
| 7569 LMBR1L          | SOX2 regulated genes in Keratinocyte Overexpression from PMID: 30772301 | SOX2 |
| 7570 BLOC1S4         | SOX2 regulated genes in Keratinocyte Overexpression from PMID: 30772301 | SOX2 |
| 7571 VANGL1          | SOX2 regulated genes in Keratinocyte Overexpression from PMID: 30772301 | SOX2 |
| 7572 SAP30BP         | SOX2 regulated genes in Keratinocyte Overexpression from PMID: 30772301 | SOX2 |
| 7573 CCDC158         | SOX2 regulated genes in Keratinocyte Overexpression from PMID: 30772301 | SOX2 |
| 7574 CCDC91          | SOX2 regulated genes in Keratinocyte Overexpression from PMID: 30772301 | SOX2 |
| 7575 SPATA24         | SOX2 regulated genes in Keratinocyte Overexpression from PMID: 30772301 | SOX2 |
| 7576 C8orf76         | SOX2 regulated genes in Keratinocyte Overexpression from PMID: 30772301 | SOX2 |
| 7577 ZHX1-C8orf76    | SOX2 regulated genes in Keratinocyte Overexpression from PMID: 30772301 | SOX2 |
| 7578 MAZ             | SOX2 regulated genes in Keratinocyte Overexpression from PMID: 30772301 | SOX2 |
| 7579 JUND            | SOX2 regulated genes in Keratinocyte Overexpression from PMID: 30772301 | SOX2 |
| 7580 POLR3A          | SOX2 regulated genes in Keratinocyte Overexpression from PMID: 30772301 | SOX2 |
| 7581 FOXH1           | SOX2 regulated genes in Keratinocyte Overexpression from PMID: 30772301 | SOX2 |
| 7582 KIFC2           | SOX2 regulated genes in Keratinocyte Overexpression from PMID: 30772301 | SOX2 |
| 7583 RGS16           | SOX2 regulated genes in Keratinocyte Overexpression from PMID: 30772301 | SOX2 |
| 7584 SPIRE2          | SOX2 regulated genes in Keratinocyte Overexpression from PMID: 30772301 | SOX2 |
| 7585 CFAP45          | SOX2 regulated genes in Keratinocyte Overexpression from PMID: 30772301 | SOX2 |
| 7586 RNASEK-C17orf49 | SOX2 regulated genes in Keratinocyte Overexpression from PMID: 30772301 | SOX2 |
| 7587 C17orf49        | SOX2 regulated genes in Keratinocyte Overexpression from PMID: 30772301 | SOX2 |
| 7588 BTF3L4          | SOX2 regulated genes in Keratinocyte Overexpression from PMID: 30772301 | SOX2 |
| 7589 ATG101          | SOX2 regulated genes in Keratinocyte Overexpression from PMID: 30772301 | SOX2 |
| 7590 SOS1            | SOX2 regulated genes in Keratinocyte Overexpression from PMID: 30772301 | SOX2 |
| 7591 TMEM101         | SOX2 regulated genes in Keratinocyte Overexpression from PMID: 30772301 | SOX2 |
| 7592 BAP1            | SOX2 regulated genes in Keratinocyte Overexpression from PMID: 30772301 | SOX2 |
| 7593 PIK3R2          | SOX2 regulated genes in Keratinocyte Overexpression from PMID: 30772301 | SOX2 |
| 7594 ZMYM1           | SOX2 regulated genes in Keratinocyte Overexpression from PMID: 30772301 | SOX2 |
| 7595 B4GALT3         | SOX2 regulated genes in Keratinocyte Overexpression from PMID: 30772301 | SOX2 |
| 7596 KRR1            | SOX2 regulated genes in Keratinocyte Overexpression from PMID: 30772301 | SOX2 |
| 7597 KLHDC3          | SOX2 regulated genes in Keratinocyte Overexpression from PMID: 30772301 | SOX2 |
| 7598 ARHGAP35        | SOX2 regulated genes in Keratinocyte Overexpression from PMID: 30772301 | SOX2 |
| 7599 CXCR5           | SOX2 regulated genes in Keratinocyte Overexpression from PMID: 30772301 | SOX2 |
| 7600 NMRAL1          | SOX2 regulated genes in Keratinocyte Overexpression from PMID: 30772301 | SOX2 |
| 7601 SUPT7L          | SOX2 regulated genes in Keratinocyte Overexpression from PMID: 30772301 | SOX2 |
| 7602 TMEM65          | SOX2 regulated genes in Keratinocyte Overexpression from PMID: 30772301 | SOX2 |
| 7603 MCM2            | SOX2 regulated genes in Keratinocyte Overexpression from PMID: 30772301 | SOX2 |
| 7604 HSPE1           | SOX2 regulated genes in Keratinocyte Overexpression from PMID: 30772301 | SOX2 |
| 7605 MFSD2A          | SOX2 regulated genes in Keratinocyte Overexpression from PMID: 30772301 | SOX2 |
| 7606 HMBS            | SOX2 regulated genes in Keratinocyte Overexpression from PMID: 30772301 | SOX2 |
| 7607 SRPK2           | SOX2 regulated genes in Keratinocyte Overexpression from PMID: 30772301 | SOX2 |
| 7608 SPC25           | SOX2 regulated genes in Keratinocyte Overexpression from PMID: 30772301 | SOX2 |
| 7609 MAP4K4          | SOX2 regulated genes in Keratinocyte Overexpression from PMID: 30772301 | SOX2 |
| 7610 UBA52           | SOX2 regulated genes in Keratinocyte Overexpression from PMID: 30772301 | SOX2 |
| 7611 TTYH1           | SOX2 regulated genes in Keratinocyte Overexpression from PMID: 30772301 | SOX2 |
| 7612 MMADHC          | SOX2 regulated genes in Keratinocyte Overexpression from PMID: 30772301 | SOX2 |
| 7613 ZNF598          | SOX2 regulated genes in Keratinocyte Overexpression from PMID: 30772301 | SOX2 |
| 7614 PHLDB3          | SOX2 regulated genes in Keratinocyte Overexpression from PMID: 30772301 | SOX2 |
| 7615 FBRSL1          | SOX2 regulated genes in Keratinocyte Overexpression from PMID: 30772301 | SOX2 |
| 7616 USP7            | SOX2 regulated genes in Keratinocyte Overexpression from PMID: 30772301 | SOX2 |
| 7617 OGG1            | SOX2 regulated genes in Keratinocyte Overexpression from PMID: 30772301 | SOX2 |
| 7618 TEX19           | SOX2 regulated genes in Keratinocyte Overexpression from PMID: 30772301 | SOX2 |
| 7619 SMARCD2         | SOX2 regulated genes in Keratinocyte Overexpression from PMID: 30772301 | SOX2 |
| 7620 CHD1L           | SOX2 regulated genes in Keratinocyte Overexpression from PMID: 30772301 | SOX2 |
| 7621 MORN2           | SOX2 regulated genes in Keratinocyte Overexpression from PMID: 30772301 | SOX2 |
| 7622 PWWP2A          | SOX2 regulated genes in Keratinocyte Overexpression from PMID: 30772301 | SOX2 |
| 7623 RPS13           | SOX2 regulated genes in Keratinocyte Overexpression from PMID: 30772301 | SOX2 |

|                 |                                                                         |      |
|-----------------|-------------------------------------------------------------------------|------|
| 7624 OPRD1      | SOX2 regulated genes in Keratinocyte Overexpression from PMID: 30772301 | SOX2 |
| 7625 ZBTB9      | SOX2 regulated genes in Keratinocyte Overexpression from PMID: 30772301 | SOX2 |
| 7626 DDX54      | SOX2 regulated genes in Keratinocyte Overexpression from PMID: 30772301 | SOX2 |
| 7627 UNG        | SOX2 regulated genes in Keratinocyte Overexpression from PMID: 30772301 | SOX2 |
| 7628 EIF2D      | SOX2 regulated genes in Keratinocyte Overexpression from PMID: 30772301 | SOX2 |
| 7629 CHMP1A     | SOX2 regulated genes in Keratinocyte Overexpression from PMID: 30772301 | SOX2 |
| 7630 ICAM4      | SOX2 regulated genes in Keratinocyte Overexpression from PMID: 30772301 | SOX2 |
| 7631 ATRIP      | SOX2 regulated genes in Keratinocyte Overexpression from PMID: 30772301 | SOX2 |
| 7632 ATP2A2     | SOX2 regulated genes in Keratinocyte Overexpression from PMID: 30772301 | SOX2 |
| 7633 ERBB3      | SOX2 regulated genes in Keratinocyte Overexpression from PMID: 30772301 | SOX2 |
| 7634 HARS2      | SOX2 regulated genes in Keratinocyte Overexpression from PMID: 30772301 | SOX2 |
| 7635 TP53BP2    | SOX2 regulated genes in Keratinocyte Overexpression from PMID: 30772301 | SOX2 |
| 7636 PIGV       | SOX2 regulated genes in Keratinocyte Overexpression from PMID: 30772301 | SOX2 |
| 7637 IGSF8      | SOX2 regulated genes in Keratinocyte Overexpression from PMID: 30772301 | SOX2 |
| 7638 FIGNL1     | SOX2 regulated genes in Keratinocyte Overexpression from PMID: 30772301 | SOX2 |
| 7639 CENPL      | SOX2 regulated genes in Keratinocyte Overexpression from PMID: 30772301 | SOX2 |
| 7640 MON1A      | SOX2 regulated genes in Keratinocyte Overexpression from PMID: 30772301 | SOX2 |
| 7641 LRRC56     | SOX2 regulated genes in Keratinocyte Overexpression from PMID: 30772301 | SOX2 |
| 7642 AGRN       | SOX2 regulated genes in Keratinocyte Overexpression from PMID: 30772301 | SOX2 |
| 7643 UBE2T      | SOX2 regulated genes in Keratinocyte Overexpression from PMID: 30772301 | SOX2 |
| 7644 C16orf96   | SOX2 regulated genes in Keratinocyte Overexpression from PMID: 30772301 | SOX2 |
| 7645 SDS        | SOX2 regulated genes in Keratinocyte Overexpression from PMID: 30772301 | SOX2 |
| 7646 CRIP3      | SOX2 regulated genes in Keratinocyte Overexpression from PMID: 30772301 | SOX2 |
| 7647 PRR36      | SOX2 regulated genes in Keratinocyte Overexpression from PMID: 30772301 | SOX2 |
| 7648 LIN9       | SOX2 regulated genes in Keratinocyte Overexpression from PMID: 30772301 | SOX2 |
| 7649 CYTH2      | SOX2 regulated genes in Keratinocyte Overexpression from PMID: 30772301 | SOX2 |
| 7650 NPHP1      | SOX2 regulated genes in Keratinocyte Overexpression from PMID: 30772301 | SOX2 |
| 7651 ACOT4      | SOX2 regulated genes in Keratinocyte Overexpression from PMID: 30772301 | SOX2 |
| 7652 ADGRL2     | SOX2 regulated genes in Keratinocyte Overexpression from PMID: 30772301 | SOX2 |
| 7653 C6orf141   | SOX2 regulated genes in Keratinocyte Overexpression from PMID: 30772301 | SOX2 |
| 7654 HSPA4      | SOX2 regulated genes in Keratinocyte Overexpression from PMID: 30772301 | SOX2 |
| 7655 XAB2       | SOX2 regulated genes in Keratinocyte Overexpression from PMID: 30772301 | SOX2 |
| 7656 TRPM8      | SOX2 regulated genes in Keratinocyte Overexpression from PMID: 30772301 | SOX2 |
| 7657 NOP16      | SOX2 regulated genes in Keratinocyte Overexpression from PMID: 30772301 | SOX2 |
| 7658 PMF1-BGLAP | SOX2 regulated genes in Keratinocyte Overexpression from PMID: 30772301 | SOX2 |
| 7659 PMF1       | SOX2 regulated genes in Keratinocyte Overexpression from PMID: 30772301 | SOX2 |
| 7660 ZBTB11     | SOX2 regulated genes in Keratinocyte Overexpression from PMID: 30772301 | SOX2 |
| 7661 TMEM120A   | SOX2 regulated genes in Keratinocyte Overexpression from PMID: 30772301 | SOX2 |
| 7662 CNPPD1     | SOX2 regulated genes in Keratinocyte Overexpression from PMID: 30772301 | SOX2 |
| 7663 NEURL4     | SOX2 regulated genes in Keratinocyte Overexpression from PMID: 30772301 | SOX2 |
| 7664 POLR3K     | SOX2 regulated genes in Keratinocyte Overexpression from PMID: 30772301 | SOX2 |
| 7665 DVL3       | SOX2 regulated genes in Keratinocyte Overexpression from PMID: 30772301 | SOX2 |
| 7666 RAVR1      | SOX2 regulated genes in Keratinocyte Overexpression from PMID: 30772301 | SOX2 |
| 7667 CHEK1      | SOX2 regulated genes in Keratinocyte Overexpression from PMID: 30772301 | SOX2 |
| 7668 TMEM238    | SOX2 regulated genes in Keratinocyte Overexpression from PMID: 30772301 | SOX2 |
| 7669 UCHL5      | SOX2 regulated genes in Keratinocyte Overexpression from PMID: 30772301 | SOX2 |
| 7670 CHD1       | SOX2 regulated genes in Keratinocyte Overexpression from PMID: 30772301 | SOX2 |
| 7671 SLC25A3    | SOX2 regulated genes in Keratinocyte Overexpression from PMID: 30772301 | SOX2 |
| 7672 ZNF32      | SOX2 regulated genes in Keratinocyte Overexpression from PMID: 30772301 | SOX2 |
| 7673 SENP8      | SOX2 regulated genes in Keratinocyte Overexpression from PMID: 30772301 | SOX2 |
| 7674 METTL5     | SOX2 regulated genes in Keratinocyte Overexpression from PMID: 30772301 | SOX2 |
| 7675 ZNF566     | SOX2 regulated genes in Keratinocyte Overexpression from PMID: 30772301 | SOX2 |
| 7676 HAPLN3     | SOX2 regulated genes in Keratinocyte Overexpression from PMID: 30772301 | SOX2 |
| 7677 SMC3       | SOX2 regulated genes in Keratinocyte Overexpression from PMID: 30772301 | SOX2 |
| 7678 GADD45B    | SOX2 regulated genes in Keratinocyte Overexpression from PMID: 30772301 | SOX2 |
| 7679 MAP6       | SOX2 regulated genes in Keratinocyte Overexpression from PMID: 30772301 | SOX2 |
| 7680 ANKRD52    | SOX2 regulated genes in Keratinocyte Overexpression from PMID: 30772301 | SOX2 |
| 7681 PALMD      | SOX2 regulated genes in Keratinocyte Overexpression from PMID: 30772301 | SOX2 |
| 7682 EGR2       | SOX2 regulated genes in Keratinocyte Overexpression from PMID: 30772301 | SOX2 |
| 7683 PRR11      | SOX2 regulated genes in Keratinocyte Overexpression from PMID: 30772301 | SOX2 |
| 7684 CWC25      | SOX2 regulated genes in Keratinocyte Overexpression from PMID: 30772301 | SOX2 |



|               |                                                                         |      |
|---------------|-------------------------------------------------------------------------|------|
| 7685 HDAC3    | SOX2 regulated genes in Keratinocyte Overexpression from PMID: 30772301 | SOX2 |
| 7686 DHX37    | SOX2 regulated genes in Keratinocyte Overexpression from PMID: 30772301 | SOX2 |
| 7687 NUDCD1   | SOX2 regulated genes in Keratinocyte Overexpression from PMID: 30772301 | SOX2 |
| 7688 LIPH     | SOX2 regulated genes in Keratinocyte Overexpression from PMID: 30772301 | SOX2 |
| 7689 KIF21B   | SOX2 regulated genes in Keratinocyte Overexpression from PMID: 30772301 | SOX2 |
| 7690 DHPS     | SOX2 regulated genes in Keratinocyte Overexpression from PMID: 30772301 | SOX2 |
| 7691 TRNP1    | SOX2 regulated genes in Keratinocyte Overexpression from PMID: 30772301 | SOX2 |
| 7692 C2CD2L   | SOX2 regulated genes in Keratinocyte Overexpression from PMID: 30772301 | SOX2 |
| 7693 AMBRA1   | SOX2 regulated genes in Keratinocyte Overexpression from PMID: 30772301 | SOX2 |
| 7694 LCLAT1   | SOX2 regulated genes in Keratinocyte Overexpression from PMID: 30772301 | SOX2 |
| 7695 MRPL28   | SOX2 regulated genes in Keratinocyte Overexpression from PMID: 30772301 | SOX2 |
| 7696 ANGPTL4  | SOX2 regulated genes in Keratinocyte Overexpression from PMID: 30772301 | SOX2 |
| 7697 PLEKHA1  | SOX2 regulated genes in Keratinocyte Overexpression from PMID: 30772301 | SOX2 |
| 7698 UBXN1    | SOX2 regulated genes in Keratinocyte Overexpression from PMID: 30772301 | SOX2 |
| 7699 SDHB     | SOX2 regulated genes in Keratinocyte Overexpression from PMID: 30772301 | SOX2 |
| 7700 GALE     | SOX2 regulated genes in Keratinocyte Overexpression from PMID: 30772301 | SOX2 |
| 7701 ORAI2    | SOX2 regulated genes in Keratinocyte Overexpression from PMID: 30772301 | SOX2 |
| 7702 AMMECR1L | SOX2 regulated genes in Keratinocyte Overexpression from PMID: 30772301 | SOX2 |
| 7703 FIGLA    | SOX2 regulated genes in Keratinocyte Overexpression from PMID: 30772301 | SOX2 |
| 7704 BTBD19   | SOX2 regulated genes in Keratinocyte Overexpression from PMID: 30772301 | SOX2 |
| 7705 ZRANB2   | SOX2 regulated genes in Keratinocyte Overexpression from PMID: 30772301 | SOX2 |
| 7706 PTCHD4   | SOX2 regulated genes in Keratinocyte Overexpression from PMID: 30772301 | SOX2 |
| 7707 PRPF40B  | SOX2 regulated genes in Keratinocyte Overexpression from PMID: 30772301 | SOX2 |
| 7708 RTF1     | SOX2 regulated genes in Keratinocyte Overexpression from PMID: 30772301 | SOX2 |
| 7709 GPAT4    | SOX2 regulated genes in Keratinocyte Overexpression from PMID: 30772301 | SOX2 |
| 7710 SMC4     | SOX2 regulated genes in Keratinocyte Overexpression from PMID: 30772301 | SOX2 |
| 7711 SPTY2D1  | SOX2 regulated genes in Keratinocyte Overexpression from PMID: 30772301 | SOX2 |
| 7712 GATA3    | SOX2 regulated genes in Keratinocyte Overexpression from PMID: 30772301 | SOX2 |
| 7713 ZNF296   | SOX2 regulated genes in Keratinocyte Overexpression from PMID: 30772301 | SOX2 |
| 7714 KIF9     | SOX2 regulated genes in Keratinocyte Overexpression from PMID: 30772301 | SOX2 |
| 7715 AZIN2    | SOX2 regulated genes in Keratinocyte Overexpression from PMID: 30772301 | SOX2 |
| 7716 INTS5    | SOX2 regulated genes in Keratinocyte Overexpression from PMID: 30772301 | SOX2 |
| 7717 SULT2B1  | SOX2 regulated genes in Keratinocyte Overexpression from PMID: 30772301 | SOX2 |
| 7718 ALOX15B  | SOX2 regulated genes in Keratinocyte Overexpression from PMID: 30772301 | SOX2 |
| 7719 TIMM17A  | SOX2 regulated genes in Keratinocyte Overexpression from PMID: 30772301 | SOX2 |
| 7720 CCNL1    | SOX2 regulated genes in Keratinocyte Overexpression from PMID: 30772301 | SOX2 |
| 7721 KLHL29   | SOX2 regulated genes in Keratinocyte Overexpression from PMID: 30772301 | SOX2 |
| 7722 RAD54L2  | SOX2 regulated genes in Keratinocyte Overexpression from PMID: 30772301 | SOX2 |
| 7723 LLGL2    | SOX2 regulated genes in Keratinocyte Overexpression from PMID: 30772301 | SOX2 |
| 7724 CYBRD1   | SOX2 regulated genes in Keratinocyte Overexpression from PMID: 30772301 | SOX2 |
| 7725 DPY30    | SOX2 regulated genes in Keratinocyte Overexpression from PMID: 30772301 | SOX2 |
| 7726 C2orf69  | SOX2 regulated genes in Keratinocyte Overexpression from PMID: 30772301 | SOX2 |
| 7727 CEP83    | SOX2 regulated genes in Keratinocyte Overexpression from PMID: 30772301 | SOX2 |
| 7728 NCAPD3   | SOX2 regulated genes in Keratinocyte Overexpression from PMID: 30772301 | SOX2 |
| 7729 RNF220   | SOX2 regulated genes in Keratinocyte Overexpression from PMID: 30772301 | SOX2 |
| 7730 USP42    | SOX2 regulated genes in Keratinocyte Overexpression from PMID: 30772301 | SOX2 |
| 7731 RFC4     | SOX2 regulated genes in Keratinocyte Overexpression from PMID: 30772301 | SOX2 |
| 7732 KCTD15   | SOX2 regulated genes in Keratinocyte Overexpression from PMID: 30772301 | SOX2 |
| 7733 ZNF239   | SOX2 regulated genes in Keratinocyte Overexpression from PMID: 30772301 | SOX2 |
| 7734 RSRC2    | SOX2 regulated genes in Keratinocyte Overexpression from PMID: 30772301 | SOX2 |
| 7735 RTKN     | SOX2 regulated genes in Keratinocyte Overexpression from PMID: 30772301 | SOX2 |
| 7736 ZNF780A  | SOX2 regulated genes in Keratinocyte Overexpression from PMID: 30772301 | SOX2 |
| 7737 NVL      | SOX2 regulated genes in Keratinocyte Overexpression from PMID: 30772301 | SOX2 |
| 7738 TUFT1    | SOX2 regulated genes in Keratinocyte Overexpression from PMID: 30772301 | SOX2 |
| 7739 SRP19    | SOX2 regulated genes in Keratinocyte Overexpression from PMID: 30772301 | SOX2 |
| 7740 YARS2    | SOX2 regulated genes in Keratinocyte Overexpression from PMID: 30772301 | SOX2 |
| 7741 TDRD5    | SOX2 regulated genes in Keratinocyte Overexpression from PMID: 30772301 | SOX2 |
| 7742 RPS25    | SOX2 regulated genes in Keratinocyte Overexpression from PMID: 30772301 | SOX2 |
| 7743 ECT2     | SOX2 regulated genes in Keratinocyte Overexpression from PMID: 30772301 | SOX2 |
| 7744 MARK4    | SOX2 regulated genes in Keratinocyte Overexpression from PMID: 30772301 | SOX2 |
| 7745 GRM2     | SOX2 regulated genes in Keratinocyte Overexpression from PMID: 30772301 | SOX2 |

|               |                                                                         |      |
|---------------|-------------------------------------------------------------------------|------|
| 7746 ZNF180   | SOX2 regulated genes in Keratinocyte Overexpression from PMID: 30772301 | SOX2 |
| 7747 ACSM3    | SOX2 regulated genes in Keratinocyte Overexpression from PMID: 30772301 | SOX2 |
| 7748 PURA     | SOX2 regulated genes in Keratinocyte Overexpression from PMID: 30772301 | SOX2 |
| 7749 SCAF1    | SOX2 regulated genes in Keratinocyte Overexpression from PMID: 30772301 | SOX2 |
| 7750 ZBTB49   | SOX2 regulated genes in Keratinocyte Overexpression from PMID: 30772301 | SOX2 |
| 7751 FBXL14   | SOX2 regulated genes in Keratinocyte Overexpression from PMID: 30772301 | SOX2 |
| 7752 DDX41    | SOX2 regulated genes in Keratinocyte Overexpression from PMID: 30772301 | SOX2 |
| 7753 SLC30A6  | SOX2 regulated genes in Keratinocyte Overexpression from PMID: 30772301 | SOX2 |
| 7754 MRPL37   | SOX2 regulated genes in Keratinocyte Overexpression from PMID: 30772301 | SOX2 |
| 7755 OTUD7B   | SOX2 regulated genes in Keratinocyte Overexpression from PMID: 30772301 | SOX2 |
| 7756 UBE2J2   | SOX2 regulated genes in Keratinocyte Overexpression from PMID: 30772301 | SOX2 |
| 7757 HMGCS2   | SOX2 regulated genes in Keratinocyte Overexpression from PMID: 30772301 | SOX2 |
| 7758 SLC23A1  | SOX2 regulated genes in Keratinocyte Overexpression from PMID: 30772301 | SOX2 |
| 7759 STIL     | SOX2 regulated genes in Keratinocyte Overexpression from PMID: 30772301 | SOX2 |
| 7760 EIF3E    | SOX2 regulated genes in Keratinocyte Overexpression from PMID: 30772301 | SOX2 |
| 7761 COPS7B   | SOX2 regulated genes in Keratinocyte Overexpression from PMID: 30772301 | SOX2 |
| 7762 DPM3     | SOX2 regulated genes in Keratinocyte Overexpression from PMID: 30772301 | SOX2 |
| 7763 SLC6A15  | SOX2 regulated genes in Keratinocyte Overexpression from PMID: 30772301 | SOX2 |
| 7764 ENC1     | SOX2 regulated genes in Keratinocyte Overexpression from PMID: 30772301 | SOX2 |
| 7765 TIMM44   | SOX2 regulated genes in Keratinocyte Overexpression from PMID: 30772301 | SOX2 |
| 7766 CCDC106  | SOX2 regulated genes in Keratinocyte Overexpression from PMID: 30772301 | SOX2 |
| 7767 ZNF131   | SOX2 regulated genes in Keratinocyte Overexpression from PMID: 30772301 | SOX2 |
| 7768 PTP4A1   | SOX2 regulated genes in Keratinocyte Overexpression from PMID: 30772301 | SOX2 |
| 7769 UBIAD1   | SOX2 regulated genes in Keratinocyte Overexpression from PMID: 30772301 | SOX2 |
| 7770 SLC7A14  | SOX2 regulated genes in Keratinocyte Overexpression from PMID: 30772301 | SOX2 |
| 7771 MRPL12   | SOX2 regulated genes in Keratinocyte Overexpression from PMID: 30772301 | SOX2 |
| 7772 NUDT1    | SOX2 regulated genes in Keratinocyte Overexpression from PMID: 30772301 | SOX2 |
| 7773 TMEM138  | SOX2 regulated genes in Keratinocyte Overexpression from PMID: 30772301 | SOX2 |
| 7774 PBLD     | SOX2 regulated genes in Keratinocyte Overexpression from PMID: 30772301 | SOX2 |
| 7775 PRR14    | SOX2 regulated genes in Keratinocyte Overexpression from PMID: 30772301 | SOX2 |
| 7776 GGPS1    | SOX2 regulated genes in Keratinocyte Overexpression from PMID: 30772301 | SOX2 |
| 7777 SLC45A1  | SOX2 regulated genes in Keratinocyte Overexpression from PMID: 30772301 | SOX2 |
| 7778 PTHLH    | SOX2 regulated genes in Keratinocyte Overexpression from PMID: 30772301 | SOX2 |
| 7779 FAM83E   | SOX2 regulated genes in Keratinocyte Overexpression from PMID: 30772301 | SOX2 |
| 7780 KCNJ13   | SOX2 regulated genes in Keratinocyte Overexpression from PMID: 30772301 | SOX2 |
| 7781 COA7     | SOX2 regulated genes in Keratinocyte Overexpression from PMID: 30772301 | SOX2 |
| 7782 TOMM7    | SOX2 regulated genes in Keratinocyte Overexpression from PMID: 30772301 | SOX2 |
| 7783 KRAS     | SOX2 regulated genes in Keratinocyte Overexpression from PMID: 30772301 | SOX2 |
| 7784 HS2ST1   | SOX2 regulated genes in Keratinocyte Overexpression from PMID: 30772301 | SOX2 |
| 7785 NEK8     | SOX2 regulated genes in Keratinocyte Overexpression from PMID: 30772301 | SOX2 |
| 7786 ZNF23    | SOX2 regulated genes in Keratinocyte Overexpression from PMID: 30772301 | SOX2 |
| 7787 EPOP     | SOX2 regulated genes in Keratinocyte Overexpression from PMID: 30772301 | SOX2 |
| 7788 NT5E     | SOX2 regulated genes in Keratinocyte Overexpression from PMID: 30772301 | SOX2 |
| 7789 S100A1   | SOX2 regulated genes in Keratinocyte Overexpression from PMID: 30772301 | SOX2 |
| 7790 FUT1     | SOX2 regulated genes in Keratinocyte Overexpression from PMID: 30772301 | SOX2 |
| 7791 POLR3D   | SOX2 regulated genes in Keratinocyte Overexpression from PMID: 30772301 | SOX2 |
| 7792 EGFR     | SOX2 regulated genes in Keratinocyte Overexpression from PMID: 30772301 | SOX2 |
| 7793 ZNF446   | SOX2 regulated genes in Keratinocyte Overexpression from PMID: 30772301 | SOX2 |
| 7794 PIH1D2   | SOX2 regulated genes in Keratinocyte Overexpression from PMID: 30772301 | SOX2 |
| 7795 CDK5RAP2 | SOX2 regulated genes in Keratinocyte Overexpression from PMID: 30772301 | SOX2 |
| 7796 VPS37C   | SOX2 regulated genes in Keratinocyte Overexpression from PMID: 30772301 | SOX2 |
| 7797 GALK1    | SOX2 regulated genes in Keratinocyte Overexpression from PMID: 30772301 | SOX2 |
| 7798 G3BP1    | SOX2 regulated genes in Keratinocyte Overexpression from PMID: 30772301 | SOX2 |
| 7799 BBS2     | SOX2 regulated genes in Keratinocyte Overexpression from PMID: 30772301 | SOX2 |
| 7800 OVGP1    | SOX2 regulated genes in Keratinocyte Overexpression from PMID: 30772301 | SOX2 |
| 7801 FBXO33   | SOX2 regulated genes in Keratinocyte Overexpression from PMID: 30772301 | SOX2 |
| 7802 EPN3     | SOX2 regulated genes in Keratinocyte Overexpression from PMID: 30772301 | SOX2 |
| 7803 FOXO6    | SOX2 regulated genes in Keratinocyte Overexpression from PMID: 30772301 | SOX2 |
| 7804 ZDHHC1   | SOX2 regulated genes in Keratinocyte Overexpression from PMID: 30772301 | SOX2 |
| 7805 PHOSPHO2 | SOX2 regulated genes in Keratinocyte Overexpression from PMID: 30772301 | SOX2 |
| 7806 LRPPRC   | SOX2 regulated genes in Keratinocyte Overexpression from PMID: 30772301 | SOX2 |

|      |              |                                                                         |      |
|------|--------------|-------------------------------------------------------------------------|------|
| 7807 | RNF2         | SOX2 regulated genes in Keratinocyte Overexpression from PMID: 30772301 | SOX2 |
| 7808 | ALDH3B2      | SOX2 regulated genes in Keratinocyte Overexpression from PMID: 30772301 | SOX2 |
| 7809 | BACE1        | SOX2 regulated genes in Keratinocyte Overexpression from PMID: 30772301 | SOX2 |
| 7810 | ABCB6        | SOX2 regulated genes in Keratinocyte Overexpression from PMID: 30772301 | SOX2 |
| 7811 | IMP3         | SOX2 regulated genes in Keratinocyte Overexpression from PMID: 30772301 | SOX2 |
| 7812 | PSMD2        | SOX2 regulated genes in Keratinocyte Overexpression from PMID: 30772301 | SOX2 |
| 7813 | KCNJ16       | SOX2 regulated genes in Keratinocyte Overexpression from PMID: 30772301 | SOX2 |
| 7814 | LYG1         | SOX2 regulated genes in Keratinocyte Overexpression from PMID: 30772301 | SOX2 |
| 7815 | ZNF251       | SOX2 regulated genes in Keratinocyte Overexpression from PMID: 30772301 | SOX2 |
| 7816 | BANP         | SOX2 regulated genes in Keratinocyte Overexpression from PMID: 30772301 | SOX2 |
| 7817 | TAMM41       | SOX2 regulated genes in Keratinocyte Overexpression from PMID: 30772301 | SOX2 |
| 7818 | MIER2        | SOX2 regulated genes in Keratinocyte Overexpression from PMID: 30772301 | SOX2 |
| 7819 | MAB21L3      | SOX2 regulated genes in Keratinocyte Overexpression from PMID: 30772301 | SOX2 |
| 7820 | DAXX         | SOX2 regulated genes in Keratinocyte Overexpression from PMID: 30772301 | SOX2 |
| 7821 | GIPR         | SOX2 regulated genes in Keratinocyte Overexpression from PMID: 30772301 | SOX2 |
| 7822 | HOXD4        | SOX2 regulated genes in Keratinocyte Overexpression from PMID: 30772301 | SOX2 |
| 7823 | DDX10        | SOX2 regulated genes in Keratinocyte Overexpression from PMID: 30772301 | SOX2 |
| 7824 | NSD1         | SOX2 regulated genes in Keratinocyte Overexpression from PMID: 30772301 | SOX2 |
| 7825 | ABHD14A-ACY1 | SOX2 regulated genes in Keratinocyte Overexpression from PMID: 30772301 | SOX2 |
| 7826 | ACY1         | SOX2 regulated genes in Keratinocyte Overexpression from PMID: 30772301 | SOX2 |
| 7827 | RAD9B        | SOX2 regulated genes in Keratinocyte Overexpression from PMID: 30772301 | SOX2 |
| 7828 | CCDC71L      | SOX2 regulated genes in Keratinocyte Overexpression from PMID: 30772301 | SOX2 |
| 7829 | MFN1         | SOX2 regulated genes in Keratinocyte Overexpression from PMID: 30772301 | SOX2 |
| 7830 | SLC16A11     | SOX2 regulated genes in Keratinocyte Overexpression from PMID: 30772301 | SOX2 |
| 7831 | CENPE        | SOX2 regulated genes in Keratinocyte Overexpression from PMID: 30772301 | SOX2 |
| 7832 | PSMD6        | SOX2 regulated genes in Keratinocyte Overexpression from PMID: 30772301 | SOX2 |
| 7833 | RHBDF2       | SOX2 regulated genes in Keratinocyte Overexpression from PMID: 30772301 | SOX2 |
| 7834 | HMG20B       | SOX2 regulated genes in Keratinocyte Overexpression from PMID: 30772301 | SOX2 |
| 7835 | ZSWIM4       | SOX2 regulated genes in Keratinocyte Overexpression from PMID: 30772301 | SOX2 |
| 7836 | IFT122       | SOX2 regulated genes in Keratinocyte Overexpression from PMID: 30772301 | SOX2 |
| 7837 | NOS1AP       | SOX2 regulated genes in Keratinocyte Overexpression from PMID: 30772301 | SOX2 |
| 7838 | ANAPC13      | SOX2 regulated genes in Keratinocyte Overexpression from PMID: 30772301 | SOX2 |
| 7839 | CDC23        | SOX2 regulated genes in Keratinocyte Overexpression from PMID: 30772301 | SOX2 |
| 7840 | CLCN2        | SOX2 regulated genes in Keratinocyte Overexpression from PMID: 30772301 | SOX2 |
| 7841 | ZNF445       | SOX2 regulated genes in Keratinocyte Overexpression from PMID: 30772301 | SOX2 |
| 7842 | CDC73        | SOX2 regulated genes in Keratinocyte Overexpression from PMID: 30772301 | SOX2 |
| 7843 | ASAP3        | SOX2 regulated genes in Keratinocyte Overexpression from PMID: 30772301 | SOX2 |
| 7844 | RFNG         | SOX2 regulated genes in Keratinocyte Overexpression from PMID: 30772301 | SOX2 |
| 7845 | LEMD3        | SOX2 regulated genes in Keratinocyte Overexpression from PMID: 30772301 | SOX2 |
| 7846 | MAPK6        | SOX2 regulated genes in Keratinocyte Overexpression from PMID: 30772301 | SOX2 |
| 7847 | ZNF628       | SOX2 regulated genes in Keratinocyte Overexpression from PMID: 30772301 | SOX2 |
| 7848 | IMMT         | SOX2 regulated genes in Keratinocyte Overexpression from PMID: 30772301 | SOX2 |
| 7849 | AKT1S1       | SOX2 regulated genes in Keratinocyte Overexpression from PMID: 30772301 | SOX2 |
| 7850 | RPAP1        | SOX2 regulated genes in Keratinocyte Overexpression from PMID: 30772301 | SOX2 |
| 7851 | TAF12        | SOX2 regulated genes in Keratinocyte Overexpression from PMID: 30772301 | SOX2 |
| 7852 | MFSD3        | SOX2 regulated genes in Keratinocyte Overexpression from PMID: 30772301 | SOX2 |
| 7853 | KIAA0895L    | SOX2 regulated genes in Keratinocyte Overexpression from PMID: 30772301 | SOX2 |
| 7854 | ERCC8        | SOX2 regulated genes in Keratinocyte Overexpression from PMID: 30772301 | SOX2 |
| 7855 | TRIM62       | SOX2 regulated genes in Keratinocyte Overexpression from PMID: 30772301 | SOX2 |
| 7856 | YAF2         | SOX2 regulated genes in Keratinocyte Overexpression from PMID: 30772301 | SOX2 |
| 7857 | GTF2H5       | SOX2 regulated genes in Keratinocyte Overexpression from PMID: 30772301 | SOX2 |
| 7858 | NDUFA7       | SOX2 regulated genes in Keratinocyte Overexpression from PMID: 30772301 | SOX2 |
| 7859 | MSI2         | SOX2 regulated genes in Keratinocyte Overexpression from PMID: 30772301 | SOX2 |
| 7860 | ABHD17A      | SOX2 regulated genes in Keratinocyte Overexpression from PMID: 30772301 | SOX2 |
| 7861 | PLEKHJ1      | SOX2 regulated genes in Keratinocyte Overexpression from PMID: 30772301 | SOX2 |
| 7862 | TAF15        | SOX2 regulated genes in Keratinocyte Overexpression from PMID: 30772301 | SOX2 |
| 7863 | NMNAT3       | SOX2 regulated genes in Keratinocyte Overexpression from PMID: 30772301 | SOX2 |
| 7864 | ZNF575       | SOX2 regulated genes in Keratinocyte Overexpression from PMID: 30772301 | SOX2 |
| 7865 | UBXN8        | SOX2 regulated genes in Keratinocyte Overexpression from PMID: 30772301 | SOX2 |
| 7866 | GZMM         | SOX2 regulated genes in Keratinocyte Overexpression from PMID: 30772301 | SOX2 |
| 7867 | ASPM         | SOX2 regulated genes in Keratinocyte Overexpression from PMID: 30772301 | SOX2 |

|               |                                                                         |      |
|---------------|-------------------------------------------------------------------------|------|
| 7868 ZNF700   | SOX2 regulated genes in Keratinocyte Overexpression from PMID: 30772301 | SOX2 |
| 7869 ZNF878   | SOX2 regulated genes in Keratinocyte Overexpression from PMID: 30772301 | SOX2 |
| 7870 WDR35    | SOX2 regulated genes in Keratinocyte Overexpression from PMID: 30772301 | SOX2 |
| 7871 NME5     | SOX2 regulated genes in Keratinocyte Overexpression from PMID: 30772301 | SOX2 |
| 7872 STXBP2   | SOX2 regulated genes in Keratinocyte Overexpression from PMID: 30772301 | SOX2 |
| 7873 SZT2     | SOX2 regulated genes in Keratinocyte Overexpression from PMID: 30772301 | SOX2 |
| 7874 MRFAP1L1 | SOX2 regulated genes in Keratinocyte Overexpression from PMID: 30772301 | SOX2 |
| 7875 MRFAP1   | SOX2 regulated genes in Keratinocyte Overexpression from PMID: 30772301 | SOX2 |
| 7876 CACTIN   | SOX2 regulated genes in Keratinocyte Overexpression from PMID: 30772301 | SOX2 |
| 7877 HPCA     | SOX2 regulated genes in Keratinocyte Overexpression from PMID: 30772301 | SOX2 |
| 7878 PGLS     | SOX2 regulated genes in Keratinocyte Overexpression from PMID: 30772301 | SOX2 |
| 7879 NAPA     | SOX2 regulated genes in Keratinocyte Overexpression from PMID: 30772301 | SOX2 |
| 7880 PRIM1    | SOX2 regulated genes in Keratinocyte Overexpression from PMID: 30772301 | SOX2 |
| 7881 SLC20A1  | SOX2 regulated genes in Keratinocyte Overexpression from PMID: 30772301 | SOX2 |
| 7882 BBS5     | SOX2 regulated genes in Keratinocyte Overexpression from PMID: 30772301 | SOX2 |
| 7883 GPA33    | SOX2 regulated genes in Keratinocyte Overexpression from PMID: 30772301 | SOX2 |
| 7884 NOTUM    | SOX2 regulated genes in Keratinocyte Overexpression from PMID: 30772301 | SOX2 |
| 7885 RPS9     | SOX2 regulated genes in Keratinocyte Overexpression from PMID: 30772301 | SOX2 |
| 7886 PCYT2    | SOX2 regulated genes in Keratinocyte Overexpression from PMID: 30772301 | SOX2 |
| 7887 ASCL4    | SOX2 regulated genes in Keratinocyte Overexpression from PMID: 30772301 | SOX2 |
| 7888 DNAH9    | SOX2 regulated genes in Keratinocyte Overexpression from PMID: 30772301 | SOX2 |
| 7889 CIB1     | SOX2 regulated genes in Keratinocyte Overexpression from PMID: 30772301 | SOX2 |
| 7890 CAMSAP2  | SOX2 regulated genes in Keratinocyte Overexpression from PMID: 30772301 | SOX2 |
| 7891 ATG4D    | SOX2 regulated genes in Keratinocyte Overexpression from PMID: 30772301 | SOX2 |
| 7892 ABCB10   | SOX2 regulated genes in Keratinocyte Overexpression from PMID: 30772301 | SOX2 |
| 7893 ABTB1    | SOX2 regulated genes in Keratinocyte Overexpression from PMID: 30772301 | SOX2 |
| 7894 SLC12A8  | SOX2 regulated genes in Keratinocyte Overexpression from PMID: 30772301 | SOX2 |
| 7895 MAT2A    | SOX2 regulated genes in Keratinocyte Overexpression from PMID: 30772301 | SOX2 |
| 7896 CYP4F11  | SOX2 regulated genes in Keratinocyte Overexpression from PMID: 30772301 | SOX2 |
| 7897 CYP4A11  | SOX2 regulated genes in Keratinocyte Overexpression from PMID: 30772301 | SOX2 |
| 7898 GNB1     | SOX2 regulated genes in Keratinocyte Overexpression from PMID: 30772301 | SOX2 |
| 7899 IER2     | SOX2 regulated genes in Keratinocyte Overexpression from PMID: 30772301 | SOX2 |
| 7900 RBAK     | SOX2 regulated genes in Keratinocyte Overexpression from PMID: 30772301 | SOX2 |
| 7901 PODXL2   | SOX2 regulated genes in Keratinocyte Overexpression from PMID: 30772301 | SOX2 |
| 7902 MARVELD2 | SOX2 regulated genes in Keratinocyte Overexpression from PMID: 30772301 | SOX2 |
| 7903 POLD1    | SOX2 regulated genes in Keratinocyte Overexpression from PMID: 30772301 | SOX2 |
| 7904 RPL28    | SOX2 regulated genes in Keratinocyte Overexpression from PMID: 30772301 | SOX2 |
| 7905 BMPR2    | SOX2 regulated genes in Keratinocyte Overexpression from PMID: 30772301 | SOX2 |
| 7906 LARP7    | SOX2 regulated genes in Keratinocyte Overexpression from PMID: 30772301 | SOX2 |
| 7907 VIL1     | SOX2 regulated genes in Keratinocyte Overexpression from PMID: 30772301 | SOX2 |
| 7908 TIMM29   | SOX2 regulated genes in Keratinocyte Overexpression from PMID: 30772301 | SOX2 |
| 7909 PARBP    | SOX2 regulated genes in Keratinocyte Overexpression from PMID: 30772301 | SOX2 |
| 7910 TMC6     | SOX2 regulated genes in Keratinocyte Overexpression from PMID: 30772301 | SOX2 |
| 7911 FAM222B  | SOX2 regulated genes in Keratinocyte Overexpression from PMID: 30772301 | SOX2 |
| 7912 CUL1     | SOX2 regulated genes in Keratinocyte Overexpression from PMID: 30772301 | SOX2 |
| 7913 GOLGA7   | SOX2 regulated genes in Keratinocyte Overexpression from PMID: 30772301 | SOX2 |
| 7914 SRSF11   | SOX2 regulated genes in Keratinocyte Overexpression from PMID: 30772301 | SOX2 |
| 7915 INO80B   | SOX2 regulated genes in Keratinocyte Overexpression from PMID: 30772301 | SOX2 |
| 7916 ZNF574   | SOX2 regulated genes in Keratinocyte Overexpression from PMID: 30772301 | SOX2 |
| 7917 C19orf25 | SOX2 regulated genes in Keratinocyte Overexpression from PMID: 30772301 | SOX2 |
| 7918 RASSF1   | SOX2 regulated genes in Keratinocyte Overexpression from PMID: 30772301 | SOX2 |
| 7919 CIT      | SOX2 regulated genes in Keratinocyte Overexpression from PMID: 30772301 | SOX2 |
| 7920 CDC42EP3 | SOX2 regulated genes in Keratinocyte Overexpression from PMID: 30772301 | SOX2 |
| 7921 DPYSL4   | SOX2 regulated genes in Keratinocyte Overexpression from PMID: 30772301 | SOX2 |
| 7922 CCDC73   | SOX2 regulated genes in Keratinocyte Overexpression from PMID: 30772301 | SOX2 |
| 7923 PRRT3    | SOX2 regulated genes in Keratinocyte Overexpression from PMID: 30772301 | SOX2 |
| 7924 SPTBN2   | SOX2 regulated genes in Keratinocyte Overexpression from PMID: 30772301 | SOX2 |
| 7925 RYK      | SOX2 regulated genes in Keratinocyte Overexpression from PMID: 30772301 | SOX2 |
| 7926 SPINT2   | SOX2 regulated genes in Keratinocyte Overexpression from PMID: 30772301 | SOX2 |
| 7927 IFT20    | SOX2 regulated genes in Keratinocyte Overexpression from PMID: 30772301 | SOX2 |
| 7928 PTRHD1   | SOX2 regulated genes in Keratinocyte Overexpression from PMID: 30772301 | SOX2 |

|      |          |                                                                         |      |
|------|----------|-------------------------------------------------------------------------|------|
| 7929 | CCDC43   | SOX2 regulated genes in Keratinocyte Overexpression from PMID: 30772301 | SOX2 |
| 7930 | DCTN2    | SOX2 regulated genes in Keratinocyte Overexpression from PMID: 30772301 | SOX2 |
| 7931 | LRRC46   | SOX2 regulated genes in Keratinocyte Overexpression from PMID: 30772301 | SOX2 |
| 7932 | TAF1A    | SOX2 regulated genes in Keratinocyte Overexpression from PMID: 30772301 | SOX2 |
| 7933 | AAMP     | SOX2 regulated genes in Keratinocyte Overexpression from PMID: 30772301 | SOX2 |
| 7934 | ACVR1B   | SOX2 regulated genes in Keratinocyte Overexpression from PMID: 30772301 | SOX2 |
| 7935 | CCDC74B  | SOX2 regulated genes in Keratinocyte Overexpression from PMID: 30772301 | SOX2 |
| 7936 | CCDC74A  | SOX2 regulated genes in Keratinocyte Overexpression from PMID: 30772301 | SOX2 |
| 7937 | SFTPC    | SOX2 regulated genes in Keratinocyte Overexpression from PMID: 30772301 | SOX2 |
| 7938 | AHSA1    | SOX2 regulated genes in Keratinocyte Overexpression from PMID: 30772301 | SOX2 |
| 7939 | RNF145   | SOX2 regulated genes in Keratinocyte Overexpression from PMID: 30772301 | SOX2 |
| 7940 | CXCL12   | SOX2 regulated genes in Keratinocyte Overexpression from PMID: 30772301 | SOX2 |
| 7941 | SNCAIP   | SOX2 regulated genes in Keratinocyte Overexpression from PMID: 30772301 | SOX2 |
| 7942 | TADA1    | SOX2 regulated genes in Keratinocyte Overexpression from PMID: 30772301 | SOX2 |
| 7943 | IGSF3    | SOX2 regulated genes in Keratinocyte Overexpression from PMID: 30772301 | SOX2 |
| 7944 | CENPO    | SOX2 regulated genes in Keratinocyte Overexpression from PMID: 30772301 | SOX2 |
| 7945 | RBM12B   | SOX2 regulated genes in Keratinocyte Overexpression from PMID: 30772301 | SOX2 |
| 7946 | APPBP2   | SOX2 regulated genes in Keratinocyte Overexpression from PMID: 30772301 | SOX2 |
| 7947 | TMEM186  | SOX2 regulated genes in Keratinocyte Overexpression from PMID: 30772301 | SOX2 |
| 7948 | EZR      | SOX2 regulated genes in Keratinocyte Overexpression from PMID: 30772301 | SOX2 |
| 7949 | TTC21B   | SOX2 regulated genes in Keratinocyte Overexpression from PMID: 30772301 | SOX2 |
| 7950 | FANCD2   | SOX2 regulated genes in Keratinocyte Overexpression from PMID: 30772301 | SOX2 |
| 7951 | ACOT1    | SOX2 regulated genes in Keratinocyte Overexpression from PMID: 30772301 | SOX2 |
| 7952 | ACOT2    | SOX2 regulated genes in Keratinocyte Overexpression from PMID: 30772301 | SOX2 |
| 7953 | SSX2IP   | SOX2 regulated genes in Keratinocyte Overexpression from PMID: 30772301 | SOX2 |
| 7954 | TCOF1    | SOX2 regulated genes in Keratinocyte Overexpression from PMID: 30772301 | SOX2 |
| 7955 | ZNF205   | SOX2 regulated genes in Keratinocyte Overexpression from PMID: 30772301 | SOX2 |
| 7956 | MAFK     | SOX2 regulated genes in Keratinocyte Overexpression from PMID: 30772301 | SOX2 |
| 7957 | LIN7B    | SOX2 regulated genes in Keratinocyte Overexpression from PMID: 30772301 | SOX2 |
| 7958 | DUSP7    | SOX2 regulated genes in Keratinocyte Overexpression from PMID: 30772301 | SOX2 |
| 7959 | NOTCH3   | SOX2 regulated genes in Keratinocyte Overexpression from PMID: 30772301 | SOX2 |
| 7960 | CFHR2    | SOX2 regulated genes in Keratinocyte Overexpression from PMID: 30772301 | SOX2 |
| 7961 | CFAP36   | SOX2 regulated genes in Keratinocyte Overexpression from PMID: 30772301 | SOX2 |
| 7962 | ZNF845   | SOX2 regulated genes in Keratinocyte Overexpression from PMID: 30772301 | SOX2 |
| 7963 | CTNND1   | SOX2 regulated genes in Keratinocyte Overexpression from PMID: 30772301 | SOX2 |
| 7964 | ZNF777   | SOX2 regulated genes in Keratinocyte Overexpression from PMID: 30772301 | SOX2 |
| 7965 | APLP1    | SOX2 regulated genes in Keratinocyte Overexpression from PMID: 30772301 | SOX2 |
| 7966 | TMEM231  | SOX2 regulated genes in Keratinocyte Overexpression from PMID: 30772301 | SOX2 |
| 7967 | CRTC2    | SOX2 regulated genes in Keratinocyte Overexpression from PMID: 30772301 | SOX2 |
| 7968 | FAM8A1   | SOX2 regulated genes in Keratinocyte Overexpression from PMID: 30772301 | SOX2 |
| 7969 | TMEM54   | SOX2 regulated genes in Keratinocyte Overexpression from PMID: 30772301 | SOX2 |
| 7970 | HNRNPUL1 | SOX2 regulated genes in Keratinocyte Overexpression from PMID: 30772301 | SOX2 |
| 7971 | CYB5R2   | SOX2 regulated genes in Keratinocyte Overexpression from PMID: 30772301 | SOX2 |
| 7972 | BCL9     | SOX2 regulated genes in Keratinocyte Overexpression from PMID: 30772301 | SOX2 |
| 7973 | FAM189A1 | SOX2 regulated genes in Keratinocyte Overexpression from PMID: 30772301 | SOX2 |
| 7974 | OSCAR    | SOX2 regulated genes in Keratinocyte Overexpression from PMID: 30772301 | SOX2 |
| 7975 | DYNC111  | SOX2 regulated genes in Keratinocyte Overexpression from PMID: 30772301 | SOX2 |
| 7976 | ZNF286A  | SOX2 regulated genes in Keratinocyte Overexpression from PMID: 30772301 | SOX2 |
| 7977 | RHOB     | SOX2 regulated genes in Keratinocyte Overexpression from PMID: 30772301 | SOX2 |
| 7978 | MRPL43   | SOX2 regulated genes in Keratinocyte Overexpression from PMID: 30772301 | SOX2 |
| 7979 | KMT2D    | SOX2 regulated genes in Keratinocyte Overexpression from PMID: 30772301 | SOX2 |
| 7980 | SRRM1    | SOX2 regulated genes in Keratinocyte Overexpression from PMID: 30772301 | SOX2 |
| 7981 | SRSF10   | SOX2 regulated genes in Keratinocyte Overexpression from PMID: 30772301 | SOX2 |
| 7982 | GPBP1L1  | SOX2 regulated genes in Keratinocyte Overexpression from PMID: 30772301 | SOX2 |
| 7983 | ADGRB1   | SOX2 regulated genes in Keratinocyte Overexpression from PMID: 30772301 | SOX2 |
| 7984 | PYCR3    | SOX2 regulated genes in Keratinocyte Overexpression from PMID: 30772301 | SOX2 |
| 7985 | FAM98A   | SOX2 regulated genes in Keratinocyte Overexpression from PMID: 30772301 | SOX2 |
| 7986 | STARD10  | SOX2 regulated genes in Keratinocyte Overexpression from PMID: 30772301 | SOX2 |
| 7987 | CSNK1G2  | SOX2 regulated genes in Keratinocyte Overexpression from PMID: 30772301 | SOX2 |
| 7988 | TRIP12   | SOX2 regulated genes in Keratinocyte Overexpression from PMID: 30772301 | SOX2 |
| 7989 | WWTR1    | SOX2 regulated genes in Keratinocyte Overexpression from PMID: 30772301 | SOX2 |

|                 |                                                                         |      |
|-----------------|-------------------------------------------------------------------------|------|
| 7990 C2CD3      | SOX2 regulated genes in Keratinocyte Overexpression from PMID: 30772301 | SOX2 |
| 7991 SLC25A39   | SOX2 regulated genes in Keratinocyte Overexpression from PMID: 30772301 | SOX2 |
| 7992 NACA       | SOX2 regulated genes in Keratinocyte Overexpression from PMID: 30772301 | SOX2 |
| 7993 MAP2K2     | SOX2 regulated genes in Keratinocyte Overexpression from PMID: 30772301 | SOX2 |
| 7994 WDR6       | SOX2 regulated genes in Keratinocyte Overexpression from PMID: 30772301 | SOX2 |
| 7995 TMEM216    | SOX2 regulated genes in Keratinocyte Overexpression from PMID: 30772301 | SOX2 |
| 7996 XPO1       | SOX2 regulated genes in Keratinocyte Overexpression from PMID: 30772301 | SOX2 |
| 7997 FAM53C     | SOX2 regulated genes in Keratinocyte Overexpression from PMID: 30772301 | SOX2 |
| 7998 SHANK2     | SOX2 regulated genes in Keratinocyte Overexpression from PMID: 30772301 | SOX2 |
| 7999 CEBPZ      | SOX2 regulated genes in Keratinocyte Overexpression from PMID: 30772301 | SOX2 |
| 8000 CNOT1      | SOX2 regulated genes in Keratinocyte Overexpression from PMID: 30772301 | SOX2 |
| 8001 CTF1       | SOX2 regulated genes in Keratinocyte Overexpression from PMID: 30772301 | SOX2 |
| 8002 RPL19      | SOX2 regulated genes in Keratinocyte Overexpression from PMID: 30772301 | SOX2 |
| 8003 C19orf33   | SOX2 regulated genes in Keratinocyte Overexpression from PMID: 30772301 | SOX2 |
| 8004 ELP6       | SOX2 regulated genes in Keratinocyte Overexpression from PMID: 30772301 | SOX2 |
| 8005 NAA38      | SOX2 regulated genes in Keratinocyte Overexpression from PMID: 30772301 | SOX2 |
| 8006 LRRN2      | SOX2 regulated genes in Keratinocyte Overexpression from PMID: 30772301 | SOX2 |
| 8007 SCCPDH     | SOX2 regulated genes in Keratinocyte Overexpression from PMID: 30772301 | SOX2 |
| 8008 ARHGAP33   | SOX2 regulated genes in Keratinocyte Overexpression from PMID: 30772301 | SOX2 |
| 8009 TMEM161B   | SOX2 regulated genes in Keratinocyte Overexpression from PMID: 30772301 | SOX2 |
| 8010 RELL2      | SOX2 regulated genes in Keratinocyte Overexpression from PMID: 30772301 | SOX2 |
| 8011 KCNJ14     | SOX2 regulated genes in Keratinocyte Overexpression from PMID: 30772301 | SOX2 |
| 8012 SPINK8     | SOX2 regulated genes in Keratinocyte Overexpression from PMID: 30772301 | SOX2 |
| 8013 LSM14A     | SOX2 regulated genes in Keratinocyte Overexpression from PMID: 30772301 | SOX2 |
| 8014 METRNL     | SOX2 regulated genes in Keratinocyte Overexpression from PMID: 30772301 | SOX2 |
| 8015 HSD11B2    | SOX2 regulated genes in Keratinocyte Overexpression from PMID: 30772301 | SOX2 |
| 8016 DCAF7      | SOX2 regulated genes in Keratinocyte Overexpression from PMID: 30772301 | SOX2 |
| 8017 ANKRD22    | SOX2 regulated genes in Keratinocyte Overexpression from PMID: 30772301 | SOX2 |
| 8018 ZCRB1      | SOX2 regulated genes in Keratinocyte Overexpression from PMID: 30772301 | SOX2 |
| 8019 ACAN       | SOX2 regulated genes in Keratinocyte Overexpression from PMID: 30772301 | SOX2 |
| 8020 GADD45GIP1 | SOX2 regulated genes in Keratinocyte Overexpression from PMID: 30772301 | SOX2 |
| 8021 NKPD1      | SOX2 regulated genes in Keratinocyte Overexpression from PMID: 30772301 | SOX2 |
| 8022 HOXD8      | SOX2 regulated genes in Keratinocyte Overexpression from PMID: 30772301 | SOX2 |
| 8023 ARHGAP20   | SOX2 regulated genes in Keratinocyte Overexpression from PMID: 30772301 | SOX2 |
| 8024 WDR89      | SOX2 regulated genes in Keratinocyte Overexpression from PMID: 30772301 | SOX2 |
| 8025 SENP2      | SOX2 regulated genes in Keratinocyte Overexpression from PMID: 30772301 | SOX2 |
| 8026 ELMOD3     | SOX2 regulated genes in Keratinocyte Overexpression from PMID: 30772301 | SOX2 |
| 8027 TCERG1     | SOX2 regulated genes in Keratinocyte Overexpression from PMID: 30772301 | SOX2 |
| 8028 CCDC174    | SOX2 regulated genes in Keratinocyte Overexpression from PMID: 30772301 | SOX2 |
| 8029 PRCC       | SOX2 regulated genes in Keratinocyte Overexpression from PMID: 30772301 | SOX2 |
| 8030 DBI        | SOX2 regulated genes in Keratinocyte Overexpression from PMID: 30772301 | SOX2 |
| 8031 NEMF       | SOX2 regulated genes in Keratinocyte Overexpression from PMID: 30772301 | SOX2 |
| 8032 ZNF326     | SOX2 regulated genes in Keratinocyte Overexpression from PMID: 30772301 | SOX2 |
| 8033 ITGB3BP    | SOX2 regulated genes in Keratinocyte Overexpression from PMID: 30772301 | SOX2 |
| 8034 JAGN1      | SOX2 regulated genes in Keratinocyte Overexpression from PMID: 30772301 | SOX2 |
| 8035 SIPA1L2    | SOX2 regulated genes in Keratinocyte Overexpression from PMID: 30772301 | SOX2 |
| 8036 XPO7       | SOX2 regulated genes in Keratinocyte Overexpression from PMID: 30772301 | SOX2 |
| 8037 ELOF1      | SOX2 regulated genes in Keratinocyte Overexpression from PMID: 30772301 | SOX2 |
| 8038 SPG7       | SOX2 regulated genes in Keratinocyte Overexpression from PMID: 30772301 | SOX2 |
| 8039 DIMT1      | SOX2 regulated genes in Keratinocyte Overexpression from PMID: 30772301 | SOX2 |
| 8040 RPS23      | SOX2 regulated genes in Keratinocyte Overexpression from PMID: 30772301 | SOX2 |
| 8041 ARL6IP6    | SOX2 regulated genes in Keratinocyte Overexpression from PMID: 30772301 | SOX2 |
| 8042 WNT4       | SOX2 regulated genes in Keratinocyte Overexpression from PMID: 30772301 | SOX2 |
| 8043 LMBRD2     | SOX2 regulated genes in Keratinocyte Overexpression from PMID: 30772301 | SOX2 |
| 8044 ZNF358     | SOX2 regulated genes in Keratinocyte Overexpression from PMID: 30772301 | SOX2 |
| 8045 ANKRD13C   | SOX2 regulated genes in Keratinocyte Overexpression from PMID: 30772301 | SOX2 |
| 8046 GNL1       | SOX2 regulated genes in Keratinocyte Overexpression from PMID: 30772301 | SOX2 |
| 8047 PTCO3      | SOX2 regulated genes in Keratinocyte Overexpression from PMID: 30772301 | SOX2 |
| 8048 PKP1       | SOX2 regulated genes in Keratinocyte Overexpression from PMID: 30772301 | SOX2 |
| 8049 ZNF579     | SOX2 regulated genes in Keratinocyte Overexpression from PMID: 30772301 | SOX2 |
| 8050 MME        | SOX2 regulated genes in Keratinocyte Overexpression from PMID: 30772301 | SOX2 |

|                |                                                                         |      |
|----------------|-------------------------------------------------------------------------|------|
| 8051 PUM2      | SOX2 regulated genes in Keratinocyte Overexpression from PMID: 30772301 | SOX2 |
| 8052 DDX20     | SOX2 regulated genes in Keratinocyte Overexpression from PMID: 30772301 | SOX2 |
| 8053 MLPH      | SOX2 regulated genes in Keratinocyte Overexpression from PMID: 30772301 | SOX2 |
| 8054 KRT20     | SOX2 regulated genes in Keratinocyte Overexpression from PMID: 30772301 | SOX2 |
| 8055 MSTO1     | SOX2 regulated genes in Keratinocyte Overexpression from PMID: 30772301 | SOX2 |
| 8056 DHX30     | SOX2 regulated genes in Keratinocyte Overexpression from PMID: 30772301 | SOX2 |
| 8057 NECAB2    | SOX2 regulated genes in Keratinocyte Overexpression from PMID: 30772301 | SOX2 |
| 8058 RNF126    | SOX2 regulated genes in Keratinocyte Overexpression from PMID: 30772301 | SOX2 |
| 8059 NFYC      | SOX2 regulated genes in Keratinocyte Overexpression from PMID: 30772301 | SOX2 |
| 8060 ALKBH3    | SOX2 regulated genes in Keratinocyte Overexpression from PMID: 30772301 | SOX2 |
| 8061 GUCY2D    | SOX2 regulated genes in Keratinocyte Overexpression from PMID: 30772301 | SOX2 |
| 8062 MARK2     | SOX2 regulated genes in Keratinocyte Overexpression from PMID: 30772301 | SOX2 |
| 8063 SLC25A10  | SOX2 regulated genes in Keratinocyte Overexpression from PMID: 30772301 | SOX2 |
| 8064 RNASET2   | SOX2 regulated genes in Keratinocyte Overexpression from PMID: 30772301 | SOX2 |
| 8065 CEP97     | SOX2 regulated genes in Keratinocyte Overexpression from PMID: 30772301 | SOX2 |
| 8066 RPL24     | SOX2 regulated genes in Keratinocyte Overexpression from PMID: 30772301 | SOX2 |
| 8067 ORC4      | SOX2 regulated genes in Keratinocyte Overexpression from PMID: 30772301 | SOX2 |
| 8068 SNRNP48   | SOX2 regulated genes in Keratinocyte Overexpression from PMID: 30772301 | SOX2 |
| 8069 CYSTM1    | SOX2 regulated genes in Keratinocyte Overexpression from PMID: 30772301 | SOX2 |
| 8070 ZNF623    | SOX2 regulated genes in Keratinocyte Overexpression from PMID: 30772301 | SOX2 |
| 8071 ZNF781    | SOX2 regulated genes in Keratinocyte Overexpression from PMID: 30772301 | SOX2 |
| 8072 ARFIP2    | SOX2 regulated genes in Keratinocyte Overexpression from PMID: 30772301 | SOX2 |
| 8073 HNRNPH1   | SOX2 regulated genes in Keratinocyte Overexpression from PMID: 30772301 | SOX2 |
| 8074 WBP1      | SOX2 regulated genes in Keratinocyte Overexpression from PMID: 30772301 | SOX2 |
| 8075 EML2      | SOX2 regulated genes in Keratinocyte Overexpression from PMID: 30772301 | SOX2 |
| 8076 BRD8      | SOX2 regulated genes in Keratinocyte Overexpression from PMID: 30772301 | SOX2 |
| 8077 TUBA1C    | SOX2 regulated genes in Keratinocyte Overexpression from PMID: 30772301 | SOX2 |
| 8078 CMTM4     | SOX2 regulated genes in Keratinocyte Overexpression from PMID: 30772301 | SOX2 |
| 8079 CD9       | SOX2 regulated genes in Keratinocyte Overexpression from PMID: 30772301 | SOX2 |
| 8080 ZNF672    | SOX2 regulated genes in Keratinocyte Overexpression from PMID: 30772301 | SOX2 |
| 8081 CHTOP     | SOX2 regulated genes in Keratinocyte Overexpression from PMID: 30772301 | SOX2 |
| 8082 TMEM218   | SOX2 regulated genes in Keratinocyte Overexpression from PMID: 30772301 | SOX2 |
| 8083 PEF1      | SOX2 regulated genes in Keratinocyte Overexpression from PMID: 30772301 | SOX2 |
| 8084 COG1      | SOX2 regulated genes in Keratinocyte Overexpression from PMID: 30772301 | SOX2 |
| 8085 IL1F10    | SOX2 regulated genes in Keratinocyte Overexpression from PMID: 30772301 | SOX2 |
| 8086 SAMD4B    | SOX2 regulated genes in Keratinocyte Overexpression from PMID: 30772301 | SOX2 |
| 8087 ERBB2     | SOX2 regulated genes in Keratinocyte Overexpression from PMID: 30772301 | SOX2 |
| 8088 NOM1      | SOX2 regulated genes in Keratinocyte Overexpression from PMID: 30772301 | SOX2 |
| 8089 VAV3      | SOX2 regulated genes in Keratinocyte Overexpression from PMID: 30772301 | SOX2 |
| 8090 DAPL1     | SOX2 regulated genes in Keratinocyte Overexpression from PMID: 30772301 | SOX2 |
| 8091 RHBDD2    | SOX2 regulated genes in Keratinocyte Overexpression from PMID: 30772301 | SOX2 |
| 8092 SH3BP5L   | SOX2 regulated genes in Keratinocyte Overexpression from PMID: 30772301 | SOX2 |
| 8093 TPGS1     | SOX2 regulated genes in Keratinocyte Overexpression from PMID: 30772301 | SOX2 |
| 8094 KRTAP2-3  | SOX2 regulated genes in Keratinocyte Overexpression from PMID: 30772301 | SOX2 |
| 8095 KRTAP4-11 | SOX2 regulated genes in Keratinocyte Overexpression from PMID: 30772301 | SOX2 |
| 8096 KRTAP4-8  | SOX2 regulated genes in Keratinocyte Overexpression from PMID: 30772301 | SOX2 |
| 8097 NACC1     | SOX2 regulated genes in Keratinocyte Overexpression from PMID: 30772301 | SOX2 |
| 8098 RNF26     | SOX2 regulated genes in Keratinocyte Overexpression from PMID: 30772301 | SOX2 |
| 8099 WNT9A     | SOX2 regulated genes in Keratinocyte Overexpression from PMID: 30772301 | SOX2 |
| 8100 HCAR1     | SOX2 regulated genes in Keratinocyte Overexpression from PMID: 30772301 | SOX2 |
| 8101 DHFR2     | SOX2 regulated genes in Keratinocyte Overexpression from PMID: 30772301 | SOX2 |
| 8102 TBP       | SOX2 regulated genes in Keratinocyte Overexpression from PMID: 30772301 | SOX2 |
| 8103 CAMSAP3   | SOX2 regulated genes in Keratinocyte Overexpression from PMID: 30772301 | SOX2 |
| 8104 MDM1      | SOX2 regulated genes in Keratinocyte Overexpression from PMID: 30772301 | SOX2 |
| 8105 CDC42EP4  | SOX2 regulated genes in Keratinocyte Overexpression from PMID: 30772301 | SOX2 |
| 8106 MOB2      | SOX2 regulated genes in Keratinocyte Overexpression from PMID: 30772301 | SOX2 |
| 8107 C5orf22   | SOX2 regulated genes in Keratinocyte Overexpression from PMID: 30772301 | SOX2 |
| 8108 JMJD6     | SOX2 regulated genes in Keratinocyte Overexpression from PMID: 30772301 | SOX2 |
| 8109 ELL       | SOX2 regulated genes in Keratinocyte Overexpression from PMID: 30772301 | SOX2 |
| 8110 RCCD1     | SOX2 regulated genes in Keratinocyte Overexpression from PMID: 30772301 | SOX2 |
| 8111 THOC7     | SOX2 regulated genes in Keratinocyte Overexpression from PMID: 30772301 | SOX2 |

|      |           |                                                                         |      |
|------|-----------|-------------------------------------------------------------------------|------|
| 8112 | UGT1A6    | SOX2 regulated genes in Keratinocyte Overexpression from PMID: 30772301 | SOX2 |
| 8113 | MED16     | SOX2 regulated genes in Keratinocyte Overexpression from PMID: 30772301 | SOX2 |
| 8114 | VEZT      | SOX2 regulated genes in Keratinocyte Overexpression from PMID: 30772301 | SOX2 |
| 8115 | SNRNP25   | SOX2 regulated genes in Keratinocyte Overexpression from PMID: 30772301 | SOX2 |
| 8116 | RNF19B    | SOX2 regulated genes in Keratinocyte Overexpression from PMID: 30772301 | SOX2 |
| 8117 | DDX49     | SOX2 regulated genes in Keratinocyte Overexpression from PMID: 30772301 | SOX2 |
| 8118 | BAZ2B     | SOX2 regulated genes in Keratinocyte Overexpression from PMID: 30772301 | SOX2 |
| 8119 | MUTYH     | SOX2 regulated genes in Keratinocyte Overexpression from PMID: 30772301 | SOX2 |
| 8120 | DDX55     | SOX2 regulated genes in Keratinocyte Overexpression from PMID: 30772301 | SOX2 |
| 8121 | EIF4G1    | SOX2 regulated genes in Keratinocyte Overexpression from PMID: 30772301 | SOX2 |
| 8122 | VPS37B    | SOX2 regulated genes in Keratinocyte Overexpression from PMID: 30772301 | SOX2 |
| 8123 | ATP13A3   | SOX2 regulated genes in Keratinocyte Overexpression from PMID: 30772301 | SOX2 |
| 8124 | RPL26     | SOX2 regulated genes in Keratinocyte Overexpression from PMID: 30772301 | SOX2 |
| 8125 | PLK2      | SOX2 regulated genes in Keratinocyte Overexpression from PMID: 30772301 | SOX2 |
| 8126 | SPRY4     | SOX2 regulated genes in Keratinocyte Overexpression from PMID: 30772301 | SOX2 |
| 8127 | SPATA2L   | SOX2 regulated genes in Keratinocyte Overexpression from PMID: 30772301 | SOX2 |
| 8128 | EXOC3L4   | SOX2 regulated genes in Keratinocyte Overexpression from PMID: 30772301 | SOX2 |
| 8129 | F2RL1     | SOX2 regulated genes in Keratinocyte Overexpression from PMID: 30772301 | SOX2 |
| 8130 | KRT23     | SOX2 regulated genes in Keratinocyte Overexpression from PMID: 30772301 | SOX2 |
| 8131 | ULK1      | SOX2 regulated genes in Keratinocyte Overexpression from PMID: 30772301 | SOX2 |
| 8132 | C19orf67  | SOX2 regulated genes in Keratinocyte Overexpression from PMID: 30772301 | SOX2 |
| 8133 | CCNJ      | SOX2 regulated genes in Keratinocyte Overexpression from PMID: 30772301 | SOX2 |
| 8134 | CNTROB    | SOX2 regulated genes in Keratinocyte Overexpression from PMID: 30772301 | SOX2 |
| 8135 | UXS1      | SOX2 regulated genes in Keratinocyte Overexpression from PMID: 30772301 | SOX2 |
| 8136 | MVK       | SOX2 regulated genes in Keratinocyte Overexpression from PMID: 30772301 | SOX2 |
| 8137 | RASAL2    | SOX2 regulated genes in Keratinocyte Overexpression from PMID: 30772301 | SOX2 |
| 8138 | STK11     | SOX2 regulated genes in Keratinocyte Overexpression from PMID: 30772301 | SOX2 |
| 8139 | RAD17     | SOX2 regulated genes in Keratinocyte Overexpression from PMID: 30772301 | SOX2 |
| 8140 | NDUFC2    | SOX2 regulated genes in Keratinocyte Overexpression from PMID: 30772301 | SOX2 |
| 8141 | DUOXA1    | SOX2 regulated genes in Keratinocyte Overexpression from PMID: 30772301 | SOX2 |
| 8142 | PPP2R2B   | SOX2 regulated genes in Keratinocyte Overexpression from PMID: 30772301 | SOX2 |
| 8143 | TNFAIP8L1 | SOX2 regulated genes in Keratinocyte Overexpression from PMID: 30772301 | SOX2 |
| 8144 | HDAC4     | SOX2 regulated genes in Keratinocyte Overexpression from PMID: 30772301 | SOX2 |
| 8145 | DPP3      | SOX2 regulated genes in Keratinocyte Overexpression from PMID: 30772301 | SOX2 |
| 8146 | DHRS13    | SOX2 regulated genes in Keratinocyte Overexpression from PMID: 30772301 | SOX2 |
| 8147 | DYNC2L1   | SOX2 regulated genes in Keratinocyte Overexpression from PMID: 30772301 | SOX2 |
| 8148 | ZBTB2     | SOX2 regulated genes in Keratinocyte Overexpression from PMID: 30772301 | SOX2 |
| 8149 | EIF1      | SOX2 regulated genes in Keratinocyte Overexpression from PMID: 30772301 | SOX2 |
| 8150 | RPF1      | SOX2 regulated genes in Keratinocyte Overexpression from PMID: 30772301 | SOX2 |
| 8151 | IPO7      | SOX2 regulated genes in Keratinocyte Overexpression from PMID: 30772301 | SOX2 |
| 8152 | RASSF9    | SOX2 regulated genes in Keratinocyte Overexpression from PMID: 30772301 | SOX2 |
| 8153 | ZFAND1    | SOX2 regulated genes in Keratinocyte Overexpression from PMID: 30772301 | SOX2 |
| 8154 | RABIF     | SOX2 regulated genes in Keratinocyte Overexpression from PMID: 30772301 | SOX2 |
| 8155 | MYT1L     | SOX2 regulated genes in Keratinocyte Overexpression from PMID: 30772301 | SOX2 |
| 8156 | USP37     | SOX2 regulated genes in Keratinocyte Overexpression from PMID: 30772301 | SOX2 |
| 8157 | GPN1      | SOX2 regulated genes in Keratinocyte Overexpression from PMID: 30772301 | SOX2 |
| 8158 | MED19     | SOX2 regulated genes in Keratinocyte Overexpression from PMID: 30772301 | SOX2 |
| 8159 | ADGRL3    | SOX2 regulated genes in Keratinocyte Overexpression from PMID: 30772301 | SOX2 |
| 8160 | STK11IP   | SOX2 regulated genes in Keratinocyte Overexpression from PMID: 30772301 | SOX2 |
| 8161 | PNMA1     | SOX2 regulated genes in Keratinocyte Overexpression from PMID: 30772301 | SOX2 |
| 8162 | CC2D1B    | SOX2 regulated genes in Keratinocyte Overexpression from PMID: 30772301 | SOX2 |
| 8163 | FABP4     | SOX2 regulated genes in Keratinocyte Overexpression from PMID: 30772301 | SOX2 |
| 8164 | ABHD14A   | SOX2 regulated genes in Keratinocyte Overexpression from PMID: 30772301 | SOX2 |
| 8165 | NR2F6     | SOX2 regulated genes in Keratinocyte Overexpression from PMID: 30772301 | SOX2 |
| 8166 | ARMT1     | SOX2 regulated genes in Keratinocyte Overexpression from PMID: 30772301 | SOX2 |
| 8167 | WDR33     | SOX2 regulated genes in Keratinocyte Overexpression from PMID: 30772301 | SOX2 |
| 8168 | HNRNPA3   | SOX2 regulated genes in Keratinocyte Overexpression from PMID: 30772301 | SOX2 |
| 8169 | LRIG1     | SOX2 regulated genes in Keratinocyte Overexpression from PMID: 30772301 | SOX2 |
| 8170 | ETV2      | SOX2 regulated genes in Keratinocyte Overexpression from PMID: 30772301 | SOX2 |
| 8171 | BNIP1     | SOX2 regulated genes in Keratinocyte Overexpression from PMID: 30772301 | SOX2 |
| 8172 | INSIG2    | SOX2 regulated genes in Keratinocyte Overexpression from PMID: 30772301 | SOX2 |



|      |          |                                                                         |      |
|------|----------|-------------------------------------------------------------------------|------|
| 8173 | CETN3    | SOX2 regulated genes in Keratinocyte Overexpression from PMID: 30772301 | SOX2 |
| 8174 | FAM98C   | SOX2 regulated genes in Keratinocyte Overexpression from PMID: 30772301 | SOX2 |
| 8175 | HAS3     | SOX2 regulated genes in Keratinocyte Overexpression from PMID: 30772301 | SOX2 |
| 8176 | PAN2     | SOX2 regulated genes in Keratinocyte Overexpression from PMID: 30772301 | SOX2 |
| 8177 | SPNS2    | SOX2 regulated genes in Keratinocyte Overexpression from PMID: 30772301 | SOX2 |
| 8178 | TRIM33   | SOX2 regulated genes in Keratinocyte Overexpression from PMID: 30772301 | SOX2 |
| 8179 | SGMS2    | SOX2 regulated genes in Keratinocyte Overexpression from PMID: 30772301 | SOX2 |
| 8180 | ZNF771   | SOX2 regulated genes in Keratinocyte Overexpression from PMID: 30772301 | SOX2 |
| 8181 | CLP1     | SOX2 regulated genes in Keratinocyte Overexpression from PMID: 30772301 | SOX2 |
| 8182 | DCBLD2   | SOX2 regulated genes in Keratinocyte Overexpression from PMID: 30772301 | SOX2 |
| 8183 | RRP9     | SOX2 regulated genes in Keratinocyte Overexpression from PMID: 30772301 | SOX2 |
| 8184 | OTUD3    | SOX2 regulated genes in Keratinocyte Overexpression from PMID: 30772301 | SOX2 |
| 8185 | LRRC8E   | SOX2 regulated genes in Keratinocyte Overexpression from PMID: 30772301 | SOX2 |
| 8186 | TONSL    | SOX2 regulated genes in Keratinocyte Overexpression from PMID: 30772301 | SOX2 |
| 8187 | NRDC     | SOX2 regulated genes in Keratinocyte Overexpression from PMID: 30772301 | SOX2 |
| 8188 | DCP1A    | SOX2 regulated genes in Keratinocyte Overexpression from PMID: 30772301 | SOX2 |
| 8189 | ELMO3    | SOX2 regulated genes in Keratinocyte Overexpression from PMID: 30772301 | SOX2 |
| 8190 | ZNF12    | SOX2 regulated genes in Keratinocyte Overexpression from PMID: 30772301 | SOX2 |
| 8191 | FAM126B  | SOX2 regulated genes in Keratinocyte Overexpression from PMID: 30772301 | SOX2 |
| 8192 | EDARADD  | SOX2 regulated genes in Keratinocyte Overexpression from PMID: 30772301 | SOX2 |
| 8193 | NABP2    | SOX2 regulated genes in Keratinocyte Overexpression from PMID: 30772301 | SOX2 |
| 8194 | TKT      | SOX2 regulated genes in Keratinocyte Overexpression from PMID: 30772301 | SOX2 |
| 8195 | MCUR1    | SOX2 regulated genes in Keratinocyte Overexpression from PMID: 30772301 | SOX2 |
| 8196 | GALNT3   | SOX2 regulated genes in Keratinocyte Overexpression from PMID: 30772301 | SOX2 |
| 8197 | WIF1     | SOX2 regulated genes in Keratinocyte Overexpression from PMID: 30772301 | SOX2 |
| 8198 | SGTA     | SOX2 regulated genes in Keratinocyte Overexpression from PMID: 30772301 | SOX2 |
| 8199 | DGKE     | SOX2 regulated genes in Keratinocyte Overexpression from PMID: 30772301 | SOX2 |
| 8200 | OCLN     | SOX2 regulated genes in Keratinocyte Overexpression from PMID: 30772301 | SOX2 |
| 8201 | PDLIM7   | SOX2 regulated genes in Keratinocyte Overexpression from PMID: 30772301 | SOX2 |
| 8202 | INHA     | SOX2 regulated genes in Keratinocyte Overexpression from PMID: 30772301 | SOX2 |
| 8203 | BOLA2    | SOX2 regulated genes in Keratinocyte Overexpression from PMID: 30772301 | SOX2 |
| 8204 | USH1G    | SOX2 regulated genes in Keratinocyte Overexpression from PMID: 30772301 | SOX2 |
| 8205 | KLHL18   | SOX2 regulated genes in Keratinocyte Overexpression from PMID: 30772301 | SOX2 |
| 8206 | PFDN1    | SOX2 regulated genes in Keratinocyte Overexpression from PMID: 30772301 | SOX2 |
| 8207 | DSP      | SOX2 regulated genes in Keratinocyte Overexpression from PMID: 30772301 | SOX2 |
| 8208 | TRAF3IP1 | SOX2 regulated genes in Keratinocyte Overexpression from PMID: 30772301 | SOX2 |
| 8209 | MRPS12   | SOX2 regulated genes in Keratinocyte Overexpression from PMID: 30772301 | SOX2 |
| 8210 | KNL1     | SOX2 regulated genes in Keratinocyte Overexpression from PMID: 30772301 | SOX2 |
| 8211 | CACYBP   | SOX2 regulated genes in Keratinocyte Overexpression from PMID: 30772301 | SOX2 |
| 8212 | ARIH2    | SOX2 regulated genes in Keratinocyte Overexpression from PMID: 30772301 | SOX2 |
| 8213 | POLQ     | SOX2 regulated genes in Keratinocyte Overexpression from PMID: 30772301 | SOX2 |
| 8214 | TEN1     | SOX2 regulated genes in Keratinocyte Overexpression from PMID: 30772301 | SOX2 |
| 8215 | GTF2E1   | SOX2 regulated genes in Keratinocyte Overexpression from PMID: 30772301 | SOX2 |
| 8216 | RAP1GAP  | SOX2 regulated genes in Keratinocyte Overexpression from PMID: 30772301 | SOX2 |
| 8217 | TMCO6    | SOX2 regulated genes in Keratinocyte Overexpression from PMID: 30772301 | SOX2 |
| 8218 | SPTBN4   | SOX2 regulated genes in Keratinocyte Overexpression from PMID: 30772301 | SOX2 |
| 8219 | TMEM237  | SOX2 regulated genes in Keratinocyte Overexpression from PMID: 30772301 | SOX2 |
| 8220 | ASF1B    | SOX2 regulated genes in Keratinocyte Overexpression from PMID: 30772301 | SOX2 |
| 8221 | SLC8A2   | SOX2 regulated genes in Keratinocyte Overexpression from PMID: 30772301 | SOX2 |
| 8222 | SNX11    | SOX2 regulated genes in Keratinocyte Overexpression from PMID: 30772301 | SOX2 |
| 8223 | CTU1     | SOX2 regulated genes in Keratinocyte Overexpression from PMID: 30772301 | SOX2 |
| 8224 | AKAP8    | SOX2 regulated genes in Keratinocyte Overexpression from PMID: 30772301 | SOX2 |
| 8225 | CCNL2    | SOX2 regulated genes in Keratinocyte Overexpression from PMID: 30772301 | SOX2 |
| 8226 | SPC24    | SOX2 regulated genes in Keratinocyte Overexpression from PMID: 30772301 | SOX2 |
| 8227 | SMIM5    | SOX2 regulated genes in Keratinocyte Overexpression from PMID: 30772301 | SOX2 |
| 8228 | GPATCH3  | SOX2 regulated genes in Keratinocyte Overexpression from PMID: 30772301 | SOX2 |
| 8229 | RBM4     | SOX2 regulated genes in Keratinocyte Overexpression from PMID: 30772301 | SOX2 |
| 8230 | NUF2     | SOX2 regulated genes in Keratinocyte Overexpression from PMID: 30772301 | SOX2 |
| 8231 | MRPS14   | SOX2 regulated genes in Keratinocyte Overexpression from PMID: 30772301 | SOX2 |
| 8232 | XPOT     | SOX2 regulated genes in Keratinocyte Overexpression from PMID: 30772301 | SOX2 |
| 8233 | LZTFL1   | SOX2 regulated genes in Keratinocyte Overexpression from PMID: 30772301 | SOX2 |

|      |          |                                                                         |      |
|------|----------|-------------------------------------------------------------------------|------|
| 8234 | TMEM221  | SOX2 regulated genes in Keratinocyte Overexpression from PMID: 30772301 | SOX2 |
| 8235 | KLK13    | SOX2 regulated genes in Keratinocyte Overexpression from PMID: 30772301 | SOX2 |
| 8236 | C7orf25  | SOX2 regulated genes in Keratinocyte Overexpression from PMID: 30772301 | SOX2 |
| 8237 | GLMN     | SOX2 regulated genes in Keratinocyte Overexpression from PMID: 30772301 | SOX2 |
| 8238 | WDR83    | SOX2 regulated genes in Keratinocyte Overexpression from PMID: 30772301 | SOX2 |
| 8239 | LINGO1   | SOX2 regulated genes in Keratinocyte Overexpression from PMID: 30772301 | SOX2 |
| 8240 | CNFN     | SOX2 regulated genes in Keratinocyte Overexpression from PMID: 30772301 | SOX2 |
| 8241 | CLN8     | SOX2 regulated genes in Keratinocyte Overexpression from PMID: 30772301 | SOX2 |
| 8242 | RTBDN    | SOX2 regulated genes in Keratinocyte Overexpression from PMID: 30772301 | SOX2 |
| 8243 | ALG8     | SOX2 regulated genes in Keratinocyte Overexpression from PMID: 30772301 | SOX2 |
| 8244 | ABCF3    | SOX2 regulated genes in Keratinocyte Overexpression from PMID: 30772301 | SOX2 |
| 8245 | DDX23    | SOX2 regulated genes in Keratinocyte Overexpression from PMID: 30772301 | SOX2 |
| 8246 | SLC26A9  | SOX2 regulated genes in Keratinocyte Overexpression from PMID: 30772301 | SOX2 |
| 8247 | TARBP2   | SOX2 regulated genes in Keratinocyte Overexpression from PMID: 30772301 | SOX2 |
| 8248 | FUT4     | SOX2 regulated genes in Keratinocyte Overexpression from PMID: 30772301 | SOX2 |
| 8249 | COP21    | SOX2 regulated genes in Keratinocyte Overexpression from PMID: 30772301 | SOX2 |
| 8250 | ETHE1    | SOX2 regulated genes in Keratinocyte Overexpression from PMID: 30772301 | SOX2 |
| 8251 | CNBP     | SOX2 regulated genes in Keratinocyte Overexpression from PMID: 30772301 | SOX2 |
| 8252 | TMEM9    | SOX2 regulated genes in Keratinocyte Overexpression from PMID: 30772301 | SOX2 |
| 8253 | ZNF233   | SOX2 regulated genes in Keratinocyte Overexpression from PMID: 30772301 | SOX2 |
| 8254 | RXR8     | SOX2 regulated genes in Keratinocyte Overexpression from PMID: 30772301 | SOX2 |
| 8255 | AKAP9    | SOX2 regulated genes in Keratinocyte Overexpression from PMID: 30772301 | SOX2 |
| 8256 | SERTAD4  | SOX2 regulated genes in Keratinocyte Overexpression from PMID: 30772301 | SOX2 |
| 8257 | UBALD2   | SOX2 regulated genes in Keratinocyte Overexpression from PMID: 30772301 | SOX2 |
| 8258 | DNASE2   | SOX2 regulated genes in Keratinocyte Overexpression from PMID: 30772301 | SOX2 |
| 8259 | OMG      | SOX2 regulated genes in Keratinocyte Overexpression from PMID: 30772301 | SOX2 |
| 8260 | MAN1A2   | SOX2 regulated genes in Keratinocyte Overexpression from PMID: 30772301 | SOX2 |
| 8261 | TMEM80   | SOX2 regulated genes in Keratinocyte Overexpression from PMID: 30772301 | SOX2 |
| 8262 | OLA1     | SOX2 regulated genes in Keratinocyte Overexpression from PMID: 30772301 | SOX2 |
| 8263 | TRAPPC6A | SOX2 regulated genes in Keratinocyte Overexpression from PMID: 30772301 | SOX2 |
| 8264 | SMIM7    | SOX2 regulated genes in Keratinocyte Overexpression from PMID: 30772301 | SOX2 |
| 8265 | TMEM234  | SOX2 regulated genes in Keratinocyte Overexpression from PMID: 30772301 | SOX2 |
| 8266 | PCNX3    | SOX2 regulated genes in Keratinocyte Overexpression from PMID: 30772301 | SOX2 |
| 8267 | STK36    | SOX2 regulated genes in Keratinocyte Overexpression from PMID: 30772301 | SOX2 |
| 8268 | NUMA1    | SOX2 regulated genes in Keratinocyte Overexpression from PMID: 30772301 | SOX2 |
| 8269 | FAM72C   | SOX2 regulated genes in Keratinocyte Overexpression from PMID: 30772301 | SOX2 |
| 8270 | FAM72A   | SOX2 regulated genes in Keratinocyte Overexpression from PMID: 30772301 | SOX2 |
| 8271 | FAM72D   | SOX2 regulated genes in Keratinocyte Overexpression from PMID: 30772301 | SOX2 |
| 8272 | FAM72B   | SOX2 regulated genes in Keratinocyte Overexpression from PMID: 30772301 | SOX2 |
| 8273 | MCPH1    | SOX2 regulated genes in Keratinocyte Overexpression from PMID: 30772301 | SOX2 |
| 8274 | RBM15    | SOX2 regulated genes in Keratinocyte Overexpression from PMID: 30772301 | SOX2 |
| 8275 | MYL6     | SOX2 regulated genes in Keratinocyte Overexpression from PMID: 30772301 | SOX2 |
| 8276 | GNB5     | SOX2 regulated genes in Keratinocyte Overexpression from PMID: 30772301 | SOX2 |
| 8277 | SLC4A1AP | SOX2 regulated genes in Keratinocyte Overexpression from PMID: 30772301 | SOX2 |
| 8278 | KRTCAP3  | SOX2 regulated genes in Keratinocyte Overexpression from PMID: 30772301 | SOX2 |
| 8279 | RSRC1    | SOX2 regulated genes in Keratinocyte Overexpression from PMID: 30772301 | SOX2 |
| 8280 | SP9      | SOX2 regulated genes in Keratinocyte Overexpression from PMID: 30772301 | SOX2 |
| 8281 | ASTE1    | SOX2 regulated genes in Keratinocyte Overexpression from PMID: 30772301 | SOX2 |
| 8282 | TTC1     | SOX2 regulated genes in Keratinocyte Overexpression from PMID: 30772301 | SOX2 |
| 8283 | FLYWCH1  | SOX2 regulated genes in Keratinocyte Overexpression from PMID: 30772301 | SOX2 |
| 8284 | MRPS35   | SOX2 regulated genes in Keratinocyte Overexpression from PMID: 30772301 | SOX2 |
| 8285 | CLEC2D   | SOX2 regulated genes in Keratinocyte Overexpression from PMID: 30772301 | SOX2 |
| 8286 | GLI2     | SOX2 regulated genes in Keratinocyte Overexpression from PMID: 30772301 | SOX2 |
| 8287 | GAS8     | SOX2 regulated genes in Keratinocyte Overexpression from PMID: 30772301 | SOX2 |
| 8288 | DPP4     | SOX2 regulated genes in Keratinocyte Overexpression from PMID: 30772301 | SOX2 |
| 8289 | ARMC9    | SOX2 regulated genes in Keratinocyte Overexpression from PMID: 30772301 | SOX2 |
| 8290 | FKBP8    | SOX2 regulated genes in Keratinocyte Overexpression from PMID: 30772301 | SOX2 |
| 8291 | AGER     | SOX2 regulated genes in Keratinocyte Overexpression from PMID: 30772301 | SOX2 |
| 8292 | USP36    | SOX2 regulated genes in Keratinocyte Overexpression from PMID: 30772301 | SOX2 |
| 8293 | TMEM128  | SOX2 regulated genes in Keratinocyte Overexpression from PMID: 30772301 | SOX2 |
| 8294 | KIF21A   | SOX2 regulated genes in Keratinocyte Overexpression from PMID: 30772301 | SOX2 |

|               |                                                                         |      |
|---------------|-------------------------------------------------------------------------|------|
| 8295 BRI3BP   | SOX2 regulated genes in Keratinocyte Overexpression from PMID: 30772301 | SOX2 |
| 8296 ADAT3    | SOX2 regulated genes in Keratinocyte Overexpression from PMID: 30772301 | SOX2 |
| 8297 USP54    | SOX2 regulated genes in Keratinocyte Overexpression from PMID: 30772301 | SOX2 |
| 8298 TIPIN    | SOX2 regulated genes in Keratinocyte Overexpression from PMID: 30772301 | SOX2 |
| 8299 RPTN     | SOX2 regulated genes in Keratinocyte Overexpression from PMID: 30772301 | SOX2 |
| 8300 RAB3GAP2 | SOX2 regulated genes in Keratinocyte Overexpression from PMID: 30772301 | SOX2 |
| 8301 ULK4     | SOX2 regulated genes in Keratinocyte Overexpression from PMID: 30772301 | SOX2 |
| 8302 RAB24    | SOX2 regulated genes in Keratinocyte Overexpression from PMID: 30772301 | SOX2 |
| 8303 PFKFB2   | SOX2 regulated genes in Keratinocyte Overexpression from PMID: 30772301 | SOX2 |
| 8304 MARVELD3 | SOX2 regulated genes in Keratinocyte Overexpression from PMID: 30772301 | SOX2 |
| 8305 BAG6     | SOX2 regulated genes in Keratinocyte Overexpression from PMID: 30772301 | SOX2 |
| 8306 DCTPP1   | SOX2 regulated genes in Keratinocyte Overexpression from PMID: 30772301 | SOX2 |
| 8307 UBXN7    | SOX2 regulated genes in Keratinocyte Overexpression from PMID: 30772301 | SOX2 |
| 8308 THADA    | SOX2 regulated genes in Keratinocyte Overexpression from PMID: 30772301 | SOX2 |
| 8309 LTBP4    | SOX2 regulated genes in Keratinocyte Overexpression from PMID: 30772301 | SOX2 |
| 8310 ARHGEF28 | SOX2 regulated genes in Keratinocyte Overexpression from PMID: 30772301 | SOX2 |
| 8311 HNRNPA1  | SOX2 regulated genes in Keratinocyte Overexpression from PMID: 30772301 | SOX2 |
| 8312 DDR1     | SOX2 regulated genes in Keratinocyte Overexpression from PMID: 30772301 | SOX2 |
| 8313 TYW3     | SOX2 regulated genes in Keratinocyte Overexpression from PMID: 30772301 | SOX2 |
| 8314 TOPBP1   | SOX2 regulated genes in Keratinocyte Overexpression from PMID: 30772301 | SOX2 |
| 8315 PRKCZ    | SOX2 regulated genes in Keratinocyte Overexpression from PMID: 30772301 | SOX2 |
| 8316 DEAF1    | SOX2 regulated genes in Keratinocyte Overexpression from PMID: 30772301 | SOX2 |
| 8317 BRD4     | SOX2 regulated genes in Keratinocyte Overexpression from PMID: 30772301 | SOX2 |
| 8318 ATP5F1D  | SOX2 regulated genes in Keratinocyte Overexpression from PMID: 30772301 | SOX2 |
| 8319 MMACHC   | SOX2 regulated genes in Keratinocyte Overexpression from PMID: 30772301 | SOX2 |
| 8320 CCNJL    | SOX2 regulated genes in Keratinocyte Overexpression from PMID: 30772301 | SOX2 |
| 8321 PHF23    | SOX2 regulated genes in Keratinocyte Overexpression from PMID: 30772301 | SOX2 |
| 8322 KIFAP3   | SOX2 regulated genes in Keratinocyte Overexpression from PMID: 30772301 | SOX2 |
| 8323 POLE     | SOX2 regulated genes in Keratinocyte Overexpression from PMID: 30772301 | SOX2 |
| 8324 DDB1     | SOX2 regulated genes in Keratinocyte Overexpression from PMID: 30772301 | SOX2 |
| 8325 CNIH4    | SOX2 regulated genes in Keratinocyte Overexpression from PMID: 30772301 | SOX2 |
| 8326 GNG4     | SOX2 regulated genes in Keratinocyte Overexpression from PMID: 30772301 | SOX2 |
| 8327 GORASP1  | SOX2 regulated genes in Keratinocyte Overexpression from PMID: 30772301 | SOX2 |
| 8328 ZNF316   | SOX2 regulated genes in Keratinocyte Overexpression from PMID: 30772301 | SOX2 |
| 8329 YOD1     | SOX2 regulated genes in Keratinocyte Overexpression from PMID: 30772301 | SOX2 |
| 8330 TLL4     | SOX2 regulated genes in Keratinocyte Overexpression from PMID: 30772301 | SOX2 |
| 8331 JUNB     | SOX2 regulated genes in Keratinocyte Overexpression from PMID: 30772301 | SOX2 |
| 8332 KIF1B    | SOX2 regulated genes in Keratinocyte Overexpression from PMID: 30772301 | SOX2 |
| 8333 PRPF4B   | SOX2 regulated genes in Keratinocyte Overexpression from PMID: 30772301 | SOX2 |
| 8334 GRXCR2   | SOX2 regulated genes in Keratinocyte Overexpression from PMID: 30772301 | SOX2 |
| 8335 NDC1     | SOX2 regulated genes in Keratinocyte Overexpression from PMID: 30772301 | SOX2 |
| 8336 RBBP5    | SOX2 regulated genes in Keratinocyte Overexpression from PMID: 30772301 | SOX2 |
| 8337 VAMP8    | SOX2 regulated genes in Keratinocyte Overexpression from PMID: 30772301 | SOX2 |
| 8338 KNTC1    | SOX2 regulated genes in Keratinocyte Overexpression from PMID: 30772301 | SOX2 |
| 8339 SOX13    | SOX2 regulated genes in Keratinocyte Overexpression from PMID: 30772301 | SOX2 |
| 8340 TMEM79   | SOX2 regulated genes in Keratinocyte Overexpression from PMID: 30772301 | SOX2 |
| 8341 INTS2    | SOX2 regulated genes in Keratinocyte Overexpression from PMID: 30772301 | SOX2 |
| 8342 RBM34    | SOX2 regulated genes in Keratinocyte Overexpression from PMID: 30772301 | SOX2 |
| 8343 PSMG3    | SOX2 regulated genes in Keratinocyte Overexpression from PMID: 30772301 | SOX2 |
| 8344 NMNAT2   | SOX2 regulated genes in Keratinocyte Overexpression from PMID: 30772301 | SOX2 |
| 8345 FAM171A2 | SOX2 regulated genes in Keratinocyte Overexpression from PMID: 30772301 | SOX2 |
| 8346 TEX38    | SOX2 regulated genes in Keratinocyte Overexpression from PMID: 30772301 | SOX2 |
| 8347 TTC36    | SOX2 regulated genes in Keratinocyte Overexpression from PMID: 30772301 | SOX2 |
| 8348 CELF1    | SOX2 regulated genes in Keratinocyte Overexpression from PMID: 30772301 | SOX2 |
| 8349 MRPL9    | SOX2 regulated genes in Keratinocyte Overexpression from PMID: 30772301 | SOX2 |
| 8350 CERS3    | SOX2 regulated genes in Keratinocyte Overexpression from PMID: 30772301 | SOX2 |
| 8351 CIDEB    | SOX2 regulated genes in Keratinocyte Overexpression from PMID: 30772301 | SOX2 |
| 8352 METTL2A  | SOX2 regulated genes in Keratinocyte Overexpression from PMID: 30772301 | SOX2 |
| 8353 IL11RA   | SOX2 regulated genes in Keratinocyte Overexpression from PMID: 30772301 | SOX2 |
| 8354 BCL7C    | SOX2 regulated genes in Keratinocyte Overexpression from PMID: 30772301 | SOX2 |
| 8355 AZIN1    | SOX2 regulated genes in Keratinocyte Overexpression from PMID: 30772301 | SOX2 |

|               |                                                                         |      |
|---------------|-------------------------------------------------------------------------|------|
| 8356 DNAJC9   | SOX2 regulated genes in Keratinocyte Overexpression from PMID: 30772301 | SOX2 |
| 8357 IMPA1    | SOX2 regulated genes in Keratinocyte Overexpression from PMID: 30772301 | SOX2 |
| 8358 PRRC2C   | SOX2 regulated genes in Keratinocyte Overexpression from PMID: 30772301 | SOX2 |
| 8359 TXNDC9   | SOX2 regulated genes in Keratinocyte Overexpression from PMID: 30772301 | SOX2 |
| 8360 ODC1     | SOX2 regulated genes in Keratinocyte Overexpression from PMID: 30772301 | SOX2 |
| 8361 ZNF142   | SOX2 regulated genes in Keratinocyte Overexpression from PMID: 30772301 | SOX2 |
| 8362 FOXRED1  | SOX2 regulated genes in Keratinocyte Overexpression from PMID: 30772301 | SOX2 |
| 8363 YEATS2   | SOX2 regulated genes in Keratinocyte Overexpression from PMID: 30772301 | SOX2 |
| 8364 DEF8     | SOX2 regulated genes in Keratinocyte Overexpression from PMID: 30772301 | SOX2 |
| 8365 TRMT10C  | SOX2 regulated genes in Keratinocyte Overexpression from PMID: 30772301 | SOX2 |
| 8366 EFCAB12  | SOX2 regulated genes in Keratinocyte Overexpression from PMID: 30772301 | SOX2 |
| 8367 PSRC1    | SOX2 regulated genes in Keratinocyte Overexpression from PMID: 30772301 | SOX2 |
| 8368 IRF3     | SOX2 regulated genes in Keratinocyte Overexpression from PMID: 30772301 | SOX2 |
| 8369 CSNK1A1  | SOX2 regulated genes in Keratinocyte Overexpression from PMID: 30772301 | SOX2 |
| 8370 KANSL1   | SOX2 regulated genes in Keratinocyte Overexpression from PMID: 30772301 | SOX2 |
| 8371 BDH1     | SOX2 regulated genes in Keratinocyte Overexpression from PMID: 30772301 | SOX2 |
| 8372 TIA1     | SOX2 regulated genes in Keratinocyte Overexpression from PMID: 30772301 | SOX2 |
| 8373 C16orf72 | SOX2 regulated genes in Keratinocyte Overexpression from PMID: 30772301 | SOX2 |
| 8374 DARS2    | SOX2 regulated genes in Keratinocyte Overexpression from PMID: 30772301 | SOX2 |
| 8375 PANX1    | SOX2 regulated genes in Keratinocyte Overexpression from PMID: 30772301 | SOX2 |
| 8376 IPO11    | SOX2 regulated genes in Keratinocyte Overexpression from PMID: 30772301 | SOX2 |
| 8377 PLEKHH2  | SOX2 regulated genes in Keratinocyte Overexpression from PMID: 30772301 | SOX2 |
| 8378 SMG8     | SOX2 regulated genes in Keratinocyte Overexpression from PMID: 30772301 | SOX2 |
| 8379 HMCES    | SOX2 regulated genes in Keratinocyte Overexpression from PMID: 30772301 | SOX2 |
| 8380 C1orf56  | SOX2 regulated genes in Keratinocyte Overexpression from PMID: 30772301 | SOX2 |
| 8381 CYB561D1 | SOX2 regulated genes in Keratinocyte Overexpression from PMID: 30772301 | SOX2 |
| 8382 CBX5     | SOX2 regulated genes in Keratinocyte Overexpression from PMID: 30772301 | SOX2 |
| 8383 KLK10    | SOX2 regulated genes in Keratinocyte Overexpression from PMID: 30772301 | SOX2 |
| 8384 SS18L2   | SOX2 regulated genes in Keratinocyte Overexpression from PMID: 30772301 | SOX2 |
| 8385 RNF40    | SOX2 regulated genes in Keratinocyte Overexpression from PMID: 30772301 | SOX2 |
| 8386 CLPP     | SOX2 regulated genes in Keratinocyte Overexpression from PMID: 30772301 | SOX2 |
| 8387 ZNF608   | SOX2 regulated genes in Keratinocyte Overexpression from PMID: 30772301 | SOX2 |
| 8388 MYO18A   | SOX2 regulated genes in Keratinocyte Overexpression from PMID: 30772301 | SOX2 |
| 8389 HOXD1    | SOX2 regulated genes in Keratinocyte Overexpression from PMID: 30772301 | SOX2 |
| 8390 SKA2     | SOX2 regulated genes in Keratinocyte Overexpression from PMID: 30772301 | SOX2 |
| 8391 ATF7IP2  | SOX2 regulated genes in Keratinocyte Overexpression from PMID: 30772301 | SOX2 |
| 8392 AMH      | SOX2 regulated genes in Keratinocyte Overexpression from PMID: 30772301 | SOX2 |
| 8393 MVB12A   | SOX2 regulated genes in Keratinocyte Overexpression from PMID: 30772301 | SOX2 |
| 8394 METTL16  | SOX2 regulated genes in Keratinocyte Overexpression from PMID: 30772301 | SOX2 |
| 8395 BUB1     | SOX2 regulated genes in Keratinocyte Overexpression from PMID: 30772301 | SOX2 |
| 8396 HDAC5    | SOX2 regulated genes in Keratinocyte Overexpression from PMID: 30772301 | SOX2 |
| 8397 DENND2C  | SOX2 regulated genes in Keratinocyte Overexpression from PMID: 30772301 | SOX2 |
| 8398 ATR      | SOX2 regulated genes in Keratinocyte Overexpression from PMID: 30772301 | SOX2 |
| 8399 TRAPPC4  | SOX2 regulated genes in Keratinocyte Overexpression from PMID: 30772301 | SOX2 |
| 8400 DDX6     | SOX2 regulated genes in Keratinocyte Overexpression from PMID: 30772301 | SOX2 |
| 8401 PSD3     | SOX2 regulated genes in Keratinocyte Overexpression from PMID: 30772301 | SOX2 |
| 8402 PLBD1    | SOX2 regulated genes in Keratinocyte Overexpression from PMID: 30772301 | SOX2 |
| 8403 CCD97    | SOX2 regulated genes in Keratinocyte Overexpression from PMID: 30772301 | SOX2 |
| 8404 KIAA0825 | SOX2 regulated genes in Keratinocyte Overexpression from PMID: 30772301 | SOX2 |
| 8405 TSEN2    | SOX2 regulated genes in Keratinocyte Overexpression from PMID: 30772301 | SOX2 |
| 8406 KLF1     | SOX2 regulated genes in Keratinocyte Overexpression from PMID: 30772301 | SOX2 |
| 8407 COL11A2  | SOX2 regulated genes in Keratinocyte Overexpression from PMID: 30772301 | SOX2 |
| 8408 TDRD1    | SOX2 regulated genes in Keratinocyte Overexpression from PMID: 30772301 | SOX2 |
| 8409 IGSF9    | SOX2 regulated genes in Keratinocyte Overexpression from PMID: 30772301 | SOX2 |
| 8410 EPS8L2   | SOX2 regulated genes in Keratinocyte Overexpression from PMID: 30772301 | SOX2 |
| 8411 TERF1    | SOX2 regulated genes in Keratinocyte Overexpression from PMID: 30772301 | SOX2 |
| 8412 MXD3     | SOX2 regulated genes in Keratinocyte Overexpression from PMID: 30772301 | SOX2 |
| 8413 GABPB1   | SOX2 regulated genes in Keratinocyte Overexpression from PMID: 30772301 | SOX2 |
| 8414 WWP2     | SOX2 regulated genes in Keratinocyte Overexpression from PMID: 30772301 | SOX2 |
| 8415 CCAR2    | SOX2 regulated genes in Keratinocyte Overexpression from PMID: 30772301 | SOX2 |
| 8416 SH3TC2   | SOX2 regulated genes in Keratinocyte Overexpression from PMID: 30772301 | SOX2 |

|               |                                                                         |      |
|---------------|-------------------------------------------------------------------------|------|
| 8417 PRR22    | SOX2 regulated genes in Keratinocyte Overexpression from PMID: 30772301 | SOX2 |
| 8418 C1orf52  | SOX2 regulated genes in Keratinocyte Overexpression from PMID: 30772301 | SOX2 |
| 8419 SH3GL1   | SOX2 regulated genes in Keratinocyte Overexpression from PMID: 30772301 | SOX2 |
| 8420 DALRD3   | SOX2 regulated genes in Keratinocyte Overexpression from PMID: 30772301 | SOX2 |
| 8421 NDUFAF3  | SOX2 regulated genes in Keratinocyte Overexpression from PMID: 30772301 | SOX2 |
| 8422 NOSIP    | SOX2 regulated genes in Keratinocyte Overexpression from PMID: 30772301 | SOX2 |
| 8423 CREB3L4  | SOX2 regulated genes in Keratinocyte Overexpression from PMID: 30772301 | SOX2 |
| 8424 TRPV1    | SOX2 regulated genes in Keratinocyte Overexpression from PMID: 30772301 | SOX2 |
| 8425 HYOU1    | SOX2 regulated genes in Keratinocyte Overexpression from PMID: 30772301 | SOX2 |
| 8426 PSPN     | SOX2 regulated genes in Keratinocyte Overexpression from PMID: 30772301 | SOX2 |
| 8427 SLC35E2B | SOX2 regulated genes in Keratinocyte Overexpression from PMID: 30772301 | SOX2 |
| 8428 TMEM198  | SOX2 regulated genes in Keratinocyte Overexpression from PMID: 30772301 | SOX2 |
| 8429 RPL35A   | SOX2 regulated genes in Keratinocyte Overexpression from PMID: 30772301 | SOX2 |
| 8430 LSM6     | SOX2 regulated genes in Keratinocyte Overexpression from PMID: 30772301 | SOX2 |
| 8431 TYW5     | SOX2 regulated genes in Keratinocyte Overexpression from PMID: 30772301 | SOX2 |
| 8432 NFRKB    | SOX2 regulated genes in Keratinocyte Overexpression from PMID: 30772301 | SOX2 |
| 8433 ZC3H10   | SOX2 regulated genes in Keratinocyte Overexpression from PMID: 30772301 | SOX2 |
| 8434 RCC1L    | SOX2 regulated genes in Keratinocyte Overexpression from PMID: 30772301 | SOX2 |
| 8435 AHCTF1   | SOX2 regulated genes in Keratinocyte Overexpression from PMID: 30772301 | SOX2 |
| 8436 ENGASE   | SOX2 regulated genes in Keratinocyte Overexpression from PMID: 30772301 | SOX2 |
| 8437 PSMD4    | SOX2 regulated genes in Keratinocyte Overexpression from PMID: 30772301 | SOX2 |
| 8438 SMG7     | SOX2 regulated genes in Keratinocyte Overexpression from PMID: 30772301 | SOX2 |
| 8439 CDK10    | SOX2 regulated genes in Keratinocyte Overexpression from PMID: 30772301 | SOX2 |
| 8440 KLHL21   | SOX2 regulated genes in Keratinocyte Overexpression from PMID: 30772301 | SOX2 |
| 8441 EVI5L    | SOX2 regulated genes in Keratinocyte Overexpression from PMID: 30772301 | SOX2 |
| 8442 INTS11   | SOX2 regulated genes in Keratinocyte Overexpression from PMID: 30772301 | SOX2 |
| 8443 SUPT6H   | SOX2 regulated genes in Keratinocyte Overexpression from PMID: 30772301 | SOX2 |
| 8444 FZD7     | SOX2 regulated genes in Keratinocyte Overexpression from PMID: 30772301 | SOX2 |
| 8445 SPAST    | SOX2 regulated genes in Keratinocyte Overexpression from PMID: 30772301 | SOX2 |
| 8446 APOLD1   | SOX2 regulated genes in Keratinocyte Overexpression from PMID: 30772301 | SOX2 |
| 8447 RAPGEFL1 | SOX2 regulated genes in Keratinocyte Overexpression from PMID: 30772301 | SOX2 |
| 8448 RNFT2    | SOX2 regulated genes in Keratinocyte Overexpression from PMID: 30772301 | SOX2 |
| 8449 ADGRL1   | SOX2 regulated genes in Keratinocyte Overexpression from PMID: 30772301 | SOX2 |
| 8450 MOB4     | SOX2 regulated genes in Keratinocyte Overexpression from PMID: 30772301 | SOX2 |
| 8451 S100A6   | SOX2 regulated genes in Keratinocyte Overexpression from PMID: 30772301 | SOX2 |
| 8452 SCYL3    | SOX2 regulated genes in Keratinocyte Overexpression from PMID: 30772301 | SOX2 |
| 8453 RAPGEF2  | SOX2 regulated genes in Keratinocyte Overexpression from PMID: 30772301 | SOX2 |
| 8454 STAMBP   | SOX2 regulated genes in Keratinocyte Overexpression from PMID: 30772301 | SOX2 |
| 8455 LSR      | SOX2 regulated genes in Keratinocyte Overexpression from PMID: 30772301 | SOX2 |
| 8456 FBLN7    | SOX2 regulated genes in Keratinocyte Overexpression from PMID: 30772301 | SOX2 |
| 8457 ATIC     | SOX2 regulated genes in Keratinocyte Overexpression from PMID: 30772301 | SOX2 |
| 8458 CARF     | SOX2 regulated genes in Keratinocyte Overexpression from PMID: 30772301 | SOX2 |
| 8459 NHSL1    | SOX2 regulated genes in Keratinocyte Overexpression from PMID: 30772301 | SOX2 |
| 8460 CSRNP2   | SOX2 regulated genes in Keratinocyte Overexpression from PMID: 30772301 | SOX2 |
| 8461 CCND1    | SOX2 regulated genes in Keratinocyte Overexpression from PMID: 30772301 | SOX2 |
| 8462 UBE2G1   | SOX2 regulated genes in Keratinocyte Overexpression from PMID: 30772301 | SOX2 |
| 8463 CDKN2D   | SOX2 regulated genes in Keratinocyte Overexpression from PMID: 30772301 | SOX2 |
| 8464 WDR46    | SOX2 regulated genes in Keratinocyte Overexpression from PMID: 30772301 | SOX2 |
| 8465 SETD1B   | SOX2 regulated genes in Keratinocyte Overexpression from PMID: 30772301 | SOX2 |
| 8466 PUM1     | SOX2 regulated genes in Keratinocyte Overexpression from PMID: 30772301 | SOX2 |
| 8467 NDUFV1   | SOX2 regulated genes in Keratinocyte Overexpression from PMID: 30772301 | SOX2 |
| 8468 RABGGTB  | SOX2 regulated genes in Keratinocyte Overexpression from PMID: 30772301 | SOX2 |
| 8469 SLC35A1  | SOX2 regulated genes in Keratinocyte Overexpression from PMID: 30772301 | SOX2 |
| 8470 CSPP1    | SOX2 regulated genes in Keratinocyte Overexpression from PMID: 30772301 | SOX2 |
| 8471 COMMD1   | SOX2 regulated genes in Keratinocyte Overexpression from PMID: 30772301 | SOX2 |
| 8472 LYPD3    | SOX2 regulated genes in Keratinocyte Overexpression from PMID: 30772301 | SOX2 |
| 8473 ST3GAL5  | SOX2 regulated genes in Keratinocyte Overexpression from PMID: 30772301 | SOX2 |
| 8474 VPS54    | SOX2 regulated genes in Keratinocyte Overexpression from PMID: 30772301 | SOX2 |
| 8475 CTTNBP2  | SOX2 regulated genes in Keratinocyte Overexpression from PMID: 30772301 | SOX2 |
| 8476 MAP2K7   | SOX2 regulated genes in Keratinocyte Overexpression from PMID: 30772301 | SOX2 |
| 8477 MYO19    | SOX2 regulated genes in Keratinocyte Overexpression from PMID: 30772301 | SOX2 |

|              |                                                                         |      |
|--------------|-------------------------------------------------------------------------|------|
| 8478 FMO4    | SOX2 regulated genes in Keratinocyte Overexpression from PMID: 30772301 | SOX2 |
| 8479 VEPH1   | SOX2 regulated genes in Keratinocyte Overexpression from PMID: 30772301 | SOX2 |
| 8480 PPL     | SOX2 regulated genes in Keratinocyte Overexpression from PMID: 30772301 | SOX2 |
| 8481 EFHD1   | SOX2 regulated genes in Keratinocyte Overexpression from PMID: 30772301 | SOX2 |
| 8482 DYNC2H1 | SOX2 regulated genes in Keratinocyte Overexpression from PMID: 30772301 | SOX2 |
| 8483 SNRNP70 | SOX2 regulated genes in Keratinocyte Overexpression from PMID: 30772301 | SOX2 |
| 8484 KDF1    | SOX2 regulated genes in Keratinocyte Overexpression from PMID: 30772301 | SOX2 |
| 8485 GLIS1   | SOX2 regulated genes in Keratinocyte Overexpression from PMID: 30772301 | SOX2 |
| 8486 ERC2    | SOX2 regulated genes in Keratinocyte Overexpression from PMID: 30772301 | SOX2 |
| 8487 LRRC40  | SOX2 regulated genes in Keratinocyte Overexpression from PMID: 30772301 | SOX2 |
| 8488 TFDP2   | SOX2 regulated genes in Keratinocyte Overexpression from PMID: 30772301 | SOX2 |
| 8489 NCDN    | SOX2 regulated genes in Keratinocyte Overexpression from PMID: 30772301 | SOX2 |
| 8490 SLC35A4 | SOX2 regulated genes in Keratinocyte Overexpression from PMID: 30772301 | SOX2 |
| 8491 MRPL35  | SOX2 regulated genes in Keratinocyte Overexpression from PMID: 30772301 | SOX2 |

**Supplemental Table 6.** Module 7 genes known to be regulated by SOX2 and/or KLF5.

| gene        | source                                                                              | regulator   |
|-------------|-------------------------------------------------------------------------------------|-------------|
| 1 APOL1     | SOX2 regulated genes in Wounding from PMID: 30772301                                | SOX2        |
| 2 APOL1     | SOX2 regulated genes in Keratinocyte Overexpression from PMID: 30772301             | SOX2        |
| 3 APOL1     | Enrichr CHEA_2022: SOX2 20726797 ChIP-Seq SW620 Human                               | SOX2        |
| 4 ATP8B1    | SOX2-KLF5 coregulated genes from PMID: 33972779                                     | SOX2 + KLF5 |
| 5 BCL2L15   | SOX2-KLF5 coregulated genes from PMID: 33972779                                     | SOX2 + KLF5 |
| 6 CA2       | SOX2 regulated genes in Wounding from PMID: 30772301                                | SOX2        |
| 7 CA2       | Enrichr CHEA_2022: SOX2 20726797 ChIP-Seq SW620 Human                               | SOX2        |
| 8 CAMK1D    | Enrichr TF Perturbations followed by expression: KLF5 20726797 ChIP-Seq SW620 Human | KLF5        |
| 9 CDH3      | SOX2 regulated genes in Wounding from PMID: 30772301                                | SOX2        |
| 10 CLDN1    | SOX2 regulated genes in Wounding from PMID: 30772301                                | SOX2        |
| 11 CLDN1    | SOX2-KLF5 coregulated genes from PMID: 33972779                                     | SOX2 + KLF5 |
| 12 CLDN1    | SOX2 regulated genes in Keratinocyte Overexpression from PMID: 30772301             | SOX2        |
| 13 CLDN1    | Enrichr CHEA_2022: SOX2 20726797 ChIP-Seq SW620 Human                               | SOX2        |
| 14 CYP251   | SOX2 regulated genes in Wounding from PMID: 30772301                                | SOX2        |
| 15 DPYD     | Enrichr CHEA_2022: SOX2 20726797 ChIP-Seq SW620 Human                               | SOX2        |
| 16 DSG3     | SOX2-KLF5 coregulated genes from PMID: 33972779                                     | SOX2 + KLF5 |
| 17 DSG3     | SOX2 regulated genes in Wounding from PMID: 30772301                                | SOX2        |
| 18 DSG3     | SOX2 regulated genes in Keratinocyte Overexpression from PMID: 30772301             | SOX2        |
| 19 DSG3     | Enrichr TF Perturbations followed by expression: KLF5 20726797 ChIP-Seq SW620 Human | KLF5        |
| 20 DSP      | SOX2-KLF5 coregulated genes from PMID: 33972779                                     | SOX2 + KLF5 |
| 21 DSP      | SOX2 regulated genes in Wounding from PMID: 30772301                                | SOX2        |
| 22 DSP      | SOX2 regulated genes in Keratinocyte Overexpression from PMID: 30772301             | SOX2        |
| 23 DSP      | Enrichr CHEA_2022: SOX2 20726797 ChIP-Seq SW620 Human                               | SOX2        |
| 24 DUOX1    | SOX2 regulated genes in Wounding from PMID: 30772301                                | SOX2        |
| 25 EPPK1    | SOX2 regulated genes in Wounding from PMID: 30772301                                | SOX2        |
| 26 EPPK1    | Enrichr CHEA_2022: SOX2 20726797 ChIP-Seq SW620 Human                               | SOX2        |
| 27 GALNT5   | Enrichr CHEA_2022: SOX2 20726797 ChIP-Seq SW620 Human                               | SOX2        |
| 28 GALNT5   | Enrichr TF Perturbations followed by expression: KLF5 20726797 ChIP-Seq SW620 Human | KLF5        |
| 29 HAS3     | SOX2 regulated genes in Keratinocyte Overexpression from PMID: 30772301             | SOX2        |
| 30 HAS3     | SOX2 regulated genes in Wounding from PMID: 30772301                                | SOX2        |
| 31 HAS3     | Enrichr CHEA_2022: SOX2 20726797 ChIP-Seq SW620 Human                               | SOX2        |
| 32 HPGD     | Enrichr CHEA_2022: SOX2 20726797 ChIP-Seq SW620 Human                               | SOX2        |
| 33 HPGD     | SOX2 regulated genes from PMID: 20726797                                            | SOX2        |
| 34 KCNJ2    | SOX2-KLF5 coregulated genes from PMID: 33972779                                     | SOX2 + KLF5 |
| 35 MPP7     | SOX2 regulated genes in Wounding from PMID: 30772301                                | SOX2        |
| 36 MX1      | Enrichr CHEA_2022: SOX2 20726797 ChIP-Seq SW620 Human                               | SOX2        |
| 37 MYH9     | SOX2 regulated genes in Wounding from PMID: 30772301                                | SOX2        |
| 38 MYH9     | SOX2-KLF5 coregulated genes from PMID: 33972779                                     | SOX2 + KLF5 |
| 39 MYH9     | SOX2 regulated genes in Keratinocyte Overexpression from PMID: 30772301             | SOX2        |
| 40 NEFL     | Enrichr TF Perturbations followed by expression: KLF5 20726797 ChIP-Seq SW620 Human | KLF5        |
| 41 PDZK1IP1 | Enrichr CHEA_2022: SOX2 20726797 ChIP-Seq SW620 Human                               | SOX2        |
| 42 PHLDB2   | Enrichr CHEA_2022: SOX2 20726797 ChIP-Seq SW620 Human                               | SOX2        |
| 43 PHLDB2   | SOX2 regulated genes in Wounding from PMID: 30772301                                | SOX2        |
| 44 PHLDB2   | SOX2 regulated genes in Keratinocyte Overexpression from PMID: 30772301             | SOX2        |
| 45 SERPINB3 | Enrichr CHEA_2022: SOX2 20726797 ChIP-Seq SW620 Human                               | SOX2        |
| 46 SFRP1    | SOX2 regulated genes in Keratinocyte Overexpression from PMID: 30772301             | SOX2        |
| 47 SFRP1    | SOX2 regulated genes in Wounding from PMID: 30772301                                | SOX2        |
| 48 SGK1     | SOX2-KLF5 coregulated genes from PMID: 33972779                                     | SOX2 + KLF5 |
| 49 SGK1     | SOX2 regulated genes in Wounding from PMID: 30772301                                | SOX2        |
| 50 SH3RF2   | SOX2 regulated genes in Keratinocyte Overexpression from PMID: 30772301             | SOX2        |
| 51 SH3RF2   | Enrichr TF Perturbations followed by expression: KLF5 20726797 ChIP-Seq SW620 Human | KLF5        |
| 52 TFPI     | Enrichr CHEA_2022: SOX2 20726797 ChIP-Seq SW620 Human                               | SOX2        |
| 53 TNFAIP6  | SOX2 regulated genes in Wounding from PMID: 30772301                                | SOX2        |

**Supplemental Table 7.** Gene expression profile of upregulated EoE DEGs known to be regulated by SOX2 and/or KLF5.

| gene         | Log2FC      | Pval        | FDR_Pval    | pct.EoE_Biopsy | pct.Healthy_Control | Top_Changed_Compartment | Regulators        |
|--------------|-------------|-------------|-------------|----------------|---------------------|-------------------------|-------------------|
| 1 TNFAIP6    | 14.03276603 | 0.000195546 | 0.010489143 | 26.30969971    | 0.008333034         | Suprabasal              | SOX2              |
| 2 NRXN1      | 8.481843776 | 0.000599264 | 0.010733065 | 5.067165747    | 0.005928385         | Suprabasal              | SOX2 + KLF5       |
| 3 DPP4       | 7.164647328 | 0.004291437 | 0.022284502 | 7.110944705    | 0.042029564         | Suprabasal              | SOX2              |
| 4 TRPM6      | 6.351720177 | 0.000545165 | 0.007274975 | 12.68360569    | 0.06651167          | Superficial             | SOX2              |
| 5 LURAP1L    | 6.213447206 | 0.000715353 | 0.007615337 | 18.34363791    | 0.132134256         | Superficial             | SOX2              |
| 6 GLDC       | 5.812522131 | 9.15E-05    | 0.010489143 | 17.66430308    | 0.256528795         | Suprabasal              | KLF5              |
| 7 MYRFL      | 5.249646268 | 0.000375835 | 0.007176147 | 6.520629319    | 0.195081078         | Superficial             | SOX2              |
| 8 NEFL       | 5.137160698 | 0.000504805 | 0.007178523 | 23.20878673    | 1.038348856         | Superficial             | KLF5              |
| 9 RPTN       | 4.987397171 | 9.26E-05    | 0.007176147 | 9.402714391    | 0.681967049         | Superficial             | SOX2              |
| 10 NFATC2    | 4.981012295 | 0.000989444 | 0.008042817 | 15.46639165    | 0.386585977         | Superficial             | SOX2 + KLF5       |
| 11 LBH       | 4.82051517  | 0.000506425 | 0.010489143 | 15.18280651    | 0.367077206         | Suprabasal              | SOX2              |
| 12 ADAM28    | 4.740686733 | 0.003303641 | 0.024854712 | 5.530658274    | 0.161625895         | Basal                   | KLF5              |
| 13 KCNJ2     | 4.535506071 | 0.000196466 | 0.010489143 | 42.41879274    | 3.237283542         | Suprabasal              | SOX2 + KLF5       |
| 14 GABRP     | 4.346532147 | 5.55E-05    | 0.012455402 | 27.82034888    | 2.002158343         | Basal                   | SOX2, KLF5        |
| 15 SFRP1     | 4.336773754 | 0.000153669 | 0.010489143 | 44.6669391     | 2.593848432         | Suprabasal              | SOX2              |
| 16 EDAR      | 4.248568858 | 0.000401828 | 0.007176147 | 19.44942997    | 1.08545527          | Superficial             | SOX2              |
| 17 EPPK1     | 4.143182566 | 0.006166656 | 0.027303057 | 34.09283879    | 3.257315631         | Suprabasal              | SOX2              |
| 18 IFFO2     | 4.134503394 | 0.000250281 | 0.007176147 | 59.91842482    | 9.317539544         | Superficial             | SOX2              |
| 19 CD200R1   | 4.133533272 | 0.000506425 | 0.007178523 | 27.369393      | 0.983226601         | Superficial             | SOX2              |
| 20 APOL1     | 4.043383815 | 0.001232925 | 0.008679903 | 40.60842821    | 3.499022944         | Superficial             | SOX2              |
| 21 BMPR1B    | 3.971683288 | 0.00591569  | 0.032981404 | 5.098860854    | 0.282051825         | Basal                   | SOX2              |
| 22 IFI35     | 3.965447773 | 0.001232925 | 0.008679903 | 48.98584135    | 4.252996719         | Superficial             | SOX2              |
| 23 UPK1B     | 3.886272489 | 0.000119764 | 0.007176147 | 30.00643469    | 3.383373143         | Superficial             | KLF5, SOX2        |
| 24 CFB       | 3.852144876 | 0.000401828 | 0.007176147 | 33.99028752    | 3.320047752         | Superficial             | SOX2              |
| 25 LOXL4     | 3.819802832 | 0.000992312 | 0.014320968 | 17.36548658    | 1.18068853          | Basal                   | SOX2              |
| 26 RUNX2     | 3.769129479 | 0.000504805 | 0.007178523 | 13.80876203    | 0.842100666         | Superficial             | SOX2, SOX2 + KLF5 |
| 27 CA2       | 3.736257496 | 7.20E-05    | 0.010489143 | 56.63468793    | 13.10997844         | Suprabasal              | SOX2              |
| 28 SLC28A3   | 3.717054301 | 0.000635975 | 0.007274975 | 22.8202256     | 2.11699801          | Superficial             | SOX2              |
| 29 LYPD6B    | 3.712117954 | 0.004211401 | 0.016013117 | 23.48505282    | 1.455960635         | Superficial             | SOX2 + KLF5, SOX2 |
| 30 SGK1      | 3.680085691 | 0.000153669 | 0.007176147 | 61.49330151    | 14.372983           | Superficial             | SOX2 + KLF5, SOX2 |
| 31 SERPINB3  | 3.601168438 | 7.20E-05    | 0.012455402 | 61.04787159    | 17.17234047         | Basal                   | SOX2              |
| 32 ST8SIA6   | 3.586099976 | 0.000634007 | 0.007274975 | 9.78899944     | 0.441575518         | Superficial             | SOX2 + KLF5, SOX2 |
| 33 CCDC68    | 3.570963328 | 0.000506425 | 0.007178523 | 25.08739932    | 1.949503374         | Superficial             | SOX2              |
| 34 CMYA5     | 3.552817397 | 0.001526458 | 0.009387421 | 11.51192042    | 0.649201685         | Superficial             | SOX2 + KLF5       |
| 35 PHLDB2    | 3.526366051 | 0.000795824 | 0.010838271 | 19.35094986    | 1.167949601         | Suprabasal              | SOX2              |
| 36 CYP2S1    | 3.520993063 | 0.000992312 | 0.008042817 | 38.06773576    | 4.106293048         | Superficial             | SOX2              |
| 37 HAS3      | 3.515910568 | 0.000635975 | 0.007274975 | 31.49524154    | 3.578664882         | Superficial             | SOX2              |
| 38 PCSK6     | 3.498236414 | 5.55E-05    | 0.012455402 | 10.72980733    | 1.09770805          | Basal                   | SOX2              |
| 39 NFE2L3    | 3.298054351 | 0.000250281 | 0.007176147 | 27.78456634    | 3.028185524         | Superficial             | SOX2              |
| 40 BCL2L15   | 3.169348667 | 0.000401828 | 0.010489143 | 52.77173551    | 9.09037378          | Suprabasal              | SOX2 + KLF5       |
| 41 UPK3BL2   | 3.151048298 | 0.0033823   | 0.014108599 | 11.77819237    | 0.999182365         | Superficial             | SOX2              |
| 42 CADM4     | 3.111929462 | 0.000401828 | 0.007176147 | 34.66563546    | 5.040451809         | Superficial             | SOX2              |
| 43 PAPSS2    | 3.082313982 | 0.002315114 | 0.020052792 | 14.29165028    | 1.259098065         | Basal                   | SOX2              |
| 44 MUC4      | 3.064276121 | 0.001883197 | 0.018415354 | 9.945660526    | 1.283194417         | Basal                   | KLF5              |
| 45 NAV1      | 3.01803895  | 0.000795824 | 0.007615337 | 24.20119131    | 3.215183485         | Superficial             | SOX2              |
| 46 TNS4      | 2.993108132 | 0.001232925 | 0.008679903 | 32.53389208    | 3.314587495         | Superficial             | SOX2, SOX2 + KLF5 |
| 47 APOL4     | 2.985249452 | 0.001526458 | 0.009387421 | 13.88024072    | 1.439759571         | Superficial             | SOX2              |
| 48 FA2H      | 2.981191994 | 7.20E-05    | 0.007176147 | 27.14904728    | 2.928368931         | Superficial             | KLF5              |
| 49 GALNT4    | 2.956378661 | 0.000963884 | 0.008042817 | 31.11337918    | 3.725274822         | Superficial             | SOX2, KLF5        |
| 50 GCNT4     | 2.929654443 | 0.000196466 | 0.007176147 | 10.75329782    | 1.615330968         | Superficial             | SOX2              |
| 51 KLK1      | 2.807174652 | 0.005105016 | 0.018023407 | 15.83369405    | 1.804143357         | Superficial             | KLF5, SOX2        |
| 52 RASGRP1   | 2.782742217 | 0.008904627 | 0.040392504 | 17.65106615    | 2.44746748          | Basal                   | SOX2 + KLF5       |
| 53 PLA2G3    | 2.78085798  | 0.000989444 | 0.008042817 | 18.96022052    | 2.368144974         | Superficial             | SOX2              |
| 54 SERPINB13 | 2.770886827 | 0.000119764 | 0.012455402 | 64.24636718    | 20.44419918         | Basal                   | SOX2              |
| 55 FOXE1     | 2.755248075 | 0.000795824 | 0.007615337 | 34.51116941    | 5.187653321         | Superficial             | SOX2              |
| 56 HRH1      | 2.7242374   | 0.001883197 | 0.014679007 | 24.54736841    | 3.982327992         | Suprabasal              | SOX2 + KLF5       |
| 57 APOL2     | 2.72256637  | 0.001232925 | 0.008679903 | 27.58021793    | 3.445414582         | Superficial             | SOX2              |
| 58 IFI27     | 2.685018167 | 0.002836074 | 0.0176927   | 78.44556802    | 38.98017695         | Suprabasal              | SOX2              |
| 59 KITLG     | 2.677505538 | 7.20E-05    | 0.010489143 | 40.63911213    | 7.568671567         | Suprabasal              | SOX2              |
| 60 LY75      | 2.675558265 | 5.55E-05    | 0.007176147 | 16.56232468    | 1.694338305         | Superficial             | SOX2, SOX2 + KLF5 |
| 61 SULF1     | 2.665452586 | 0.008904627 | 0.034252903 | 2.866133536    | 0.322283713         | Suprabasal              | SOX2 + KLF5       |
| 62 CAMK1D    | 2.657917619 | 0.000506425 | 0.007178523 | 49.15873668    | 9.200779378         | Superficial             | KLF5              |
| 63 SHF       | 2.642479077 | 0.001883197 | 0.010234018 | 10.17290233    | 1.181406638         | Superficial             | SOX2              |
| 64 APOL3     | 2.616122791 | 0.000317696 | 0.007176147 | 14.03510257    | 2.124512865         | Superficial             | SOX2              |
| 65 PLSCR3    | 2.590344397 | 9.30E-05    | 0.007176147 | 51.28244557    | 9.30799657          | Superficial             | SOX2              |
| 66 DPYD      | 2.582534489 | 0.000250281 | 0.007176147 | 56.95813881    | 13.81974657         | Superficial             | SOX2              |
| 67 Clorf74   | 2.569639155 | 0.000635975 | 0.007274975 | 18.30073531    | 2.487355771         | Superficial             | SOX2              |
| 68 HS3ST3A1  | 2.549605795 | 0.003462059 | 0.014108599 | 16.86965958    | 2.495265241         | Superficial             | SOX2 + KLF5       |
| 69 ADAT3     | 2.540027253 | 0.000196466 | 0.007176147 | 10.05232351    | 1.05232351          | Superficial             | SOX2              |
| 70 RARB      | 2.530013416 | 0.000992312 | 0.008042817 | 22.96760446    | 3.024920953         | Superficial             | SOX2 + KLF5, SOX2 |
| 71 TSPAN1    | 2.529823549 | 0.008904627 | 0.025990329 | 11.37029984    | 1.026495801         | Superficial             | SOX2              |



|     |          |             |             |             |             |             |             |                   |
|-----|----------|-------------|-------------|-------------|-------------|-------------|-------------|-------------------|
| 72  | GALNT5   | 2.527879018 | 0.000153669 | 0.007176147 | 62.61494461 | 14.19470699 | Superficial | SOX2, KLF5        |
| 73  | HPGD     | 2.517803476 | 9.30E-05    | 0.012455402 | 63.4370818  | 26.66092629 | Basal       | SOX2              |
| 74  | NEK6     | 2.497806445 | 0.000196466 | 0.010489143 | 9.695906506 | 1.247626474 | Suprabasal  | SOX2              |
| 75  | USP2     | 2.470920442 | 7.20E-05    | 0.010489143 | 20.35654798 | 3.795647067 | Suprabasal  | SOX2              |
| 76  | CDH3     | 2.454629294 | 0.001883197 | 0.014679007 | 33.06720283 | 5.979505217 | Suprabasal  | SOX2              |
| 77  | NRP2     | 2.4318478   | 0.000635975 | 0.010733065 | 10.71042608 | 1.788625    | Suprabasal  | SOX2, SOX2 + KLF5 |
| 78  | CLDN1    | 2.418800238 | 0.000506425 | 0.007178523 | 59.84833475 | 16.1506835  | Superficial | SOX2, SOX2 + KLF5 |
| 79  | EHD2     | 2.365985362 | 0.000992312 | 0.008042817 | 22.15175338 | 3.977983815 | Superficial | SOX2              |
| 80  | EPHA4    | 2.363866254 | 0.002315114 | 0.011381143 | 23.97424291 | 3.646350234 | Superficial | SOX2, KLF5        |
| 81  | ATP11C   | 2.357061891 | 0.006166656 | 0.020290909 | 9.252597911 | 1.160883516 | Superficial | SOX2              |
| 82  | TMTC3    | 2.351630508 | 0.000635975 | 0.007274975 | 45.10321587 | 9.259139716 | Superficial | SOX2              |
| 83  | VDR      | 2.343310449 | 0.000506425 | 0.007178523 | 46.65513349 | 9.496180257 | Superficial | SOX2              |
| 84  | ILDR1    | 2.3418189   | 0.000635975 | 0.007274975 | 10.28288777 | 1.988042993 | Superficial | SOX2              |
| 85  | FZD10    | 2.335435136 | 0.000196466 | 0.007176147 | 38.87791107 | 6.491347125 | Superficial | SOX2              |
| 86  | GJB4     | 2.297127992 | 0.001883197 | 0.010234018 | 14.24072294 | 2.556640803 | Superficial | SOX2              |
| 87  | SOX21    | 2.296941678 | 0.000506425 | 0.007178523 | 41.19240615 | 8.728487216 | Superficial | SOX2 + KLF5, SOX2 |
| 88  | SERINC5  | 2.292352434 | 0.000992312 | 0.008042817 | 57.34016553 | 13.89975778 | Superficial | SOX2              |
| 89  | APOL6    | 2.290382729 | 0.000401828 | 0.007176147 | 47.34837516 | 9.465108027 | Superficial | SOX2              |
| 90  | SH3RF2   | 2.288890426 | 0.000401828 | 0.007176147 | 57.94436358 | 14.02325258 | Superficial | KLF5, SOX2        |
| 91  | LGALS1   | 2.268271415 | 0.001526458 | 0.009387421 | 55.59902515 | 18.58782962 | Superficial | SOX2              |
| 92  | AADAC    | 2.267827947 | 0.005105016 | 0.018023407 | 10.87524615 | 1.59110865  | Superficial | SOX2              |
| 93  | SGPP2    | 2.250143174 | 0.000119764 | 0.007176147 | 52.07167939 | 12.31623848 | Superficial | SOX2              |
| 94  | PDZK1IP1 | 2.242093901 | 0.001526458 | 0.016792744 | 64.0916668  | 22.57691274 | Basal       | SOX2              |
| 95  | GGH      | 2.23883892  | 0.000317696 | 0.007176147 | 60.15013769 | 13.53596753 | Superficial | SOX2, SOX2 + KLF5 |
| 96  | PKP2     | 2.222886641 | 0.000795824 | 0.007615337 | 26.63168494 | 2.617248693 | Superficial | SOX2              |
| 97  | UTRN     | 2.217242242 | 0.000196466 | 0.007176147 | 50.01075484 | 10.51356248 | Superficial | SOX2, SOX2 + KLF5 |
| 98  | NUP210   | 2.213606148 | 0.000795824 | 0.010838271 | 9.800731136 | 2.142050625 | Suprabasal  | SOX2              |
| 99  | CNT2     | 2.205203227 | 0.000317696 | 0.007176147 | 24.98548601 | 4.185120601 | Superficial | SOX2              |
| 100 | TSPAN3   | 2.193440752 | 0.000250281 | 0.007176147 | 72.63979106 | 28.82128249 | Superficial | SOX2              |
| 101 | MYOF     | 2.181332839 | 0.000795824 | 0.007615337 | 51.76574142 | 12.51822189 | Superficial | SOX2 + KLF5       |
| 102 | DAPK2    | 2.170784779 | 0.001232925 | 0.012246384 | 11.93187041 | 2.113989461 | Suprabasal  | SOX2              |
| 103 | CEP72    | 2.167186654 | 0.000196466 | 0.010489143 | 5.579343935 | 1.139148869 | Suprabasal  | SOX2              |
| 104 | GALR2    | 2.166969424 | 0.001232925 | 0.008679903 | 13.57405301 | 2.436665487 | Superficial | SOX2              |
| 105 | AMOTL1   | 2.165279249 | 0.000153669 | 0.007176147 | 53.80914283 | 12.90952452 | Superficial | SOX2              |
| 106 | FAM83E   | 2.154161807 | 0.001526458 | 0.009387421 | 6.837893593 | 1.341925006 | Superficial | KLF5, SOX2        |
| 107 | HBEGF    | 2.139981014 | 0.000401828 | 0.007176147 | 49.07344726 | 14.25840594 | Superficial | SOX2              |
| 108 | GIPC2    | 2.130796901 | 0.000119764 | 0.007176147 | 11.29330817 | 1.737078975 | Superficial | SOX2, SOX2 + KLF5 |
| 109 | PIK3CB   | 2.116387008 | 0.000317696 | 0.007176147 | 30.49497273 | 5.37065142  | Superficial | SOX2              |
| 110 | FNTB     | 2.113774756 | 0.000196466 | 0.007176147 | 38.35216549 | 9.331467725 | Superficial | SOX2              |
| 111 | CALML4   | 2.098383243 | 0.006116011 | 0.020290909 | 16.40768279 | 3.452763393 | Superficial | SOX2              |
| 112 | PPP2R5B  | 2.096347506 | 0.000196466 | 0.007176147 | 8.853189121 | 1.585170099 | Superficial | SOX2              |
| 113 | RAI1     | 2.083551412 | 0.000401828 | 0.007176147 | 19.62176647 | 3.030777351 | Superficial | SOX2              |
| 114 | SOX2     | 2.081913146 | 0.000401828 | 0.007176147 | 64.78270526 | 23.45059511 | Superficial | SOX2, KLF5        |
| 115 | JDP2     | 2.080656788 | 0.000119764 | 0.007176147 | 38.95069837 | 7.653122801 | Superficial | SOX2              |
| 116 | KLHL5    | 2.07040443  | 0.001883197 | 0.014679007 | 18.03936572 | 3.182826682 | Suprabasal  | SOX2              |
| 117 | PADI3    | 2.067623508 | 0.006166656 | 0.032981404 | 5.285130858 | 0.790356966 | Basal       | SOX2              |
| 118 | HS3ST1   | 2.063319572 | 0.001232925 | 0.015721789 | 23.50845249 | 5.330860422 | Basal       | SOX2, SOX2 + KLF5 |
| 119 | ARHGAP23 | 2.062876631 | 0.000992312 | 0.008042817 | 43.87809247 | 10.02607057 | Superficial | SOX2              |
| 120 | HECW2    | 2.058221439 | 9.30E-05    | 0.007176147 | 15.71587344 | 3.116907862 | Superficial | SOX2              |
| 121 | PRICKLE2 | 2.055478112 | 0.000795824 | 0.010838271 | 25.65292316 | 5.691110974 | Suprabasal  | SOX2              |
| 122 | C9orf152 | 2.042243894 | 0.000317696 | 0.007176147 | 13.25621132 | 2.381023333 | Superficial | SOX2              |
| 123 | F2RL1    | 2.04202804  | 0.000795824 | 0.007615337 | 15.22355279 | 3.090463749 | Superficial | SOX2              |
| 124 | STK17B   | 2.02769262  | 0.001526458 | 0.009387421 | 41.63652012 | 7.333922578 | Superficial | SOX2              |
| 125 | C9orf40  | 2.018582283 | 0.000401828 | 0.007176147 | 18.20397196 | 3.43412846  | Superficial | SOX2              |
| 126 | MYH9     | 2.016181739 | 0.000401828 | 0.007176147 | 61.10773592 | 18.88556925 | Superficial | SOX2 + KLF5, SOX2 |
| 127 | PLAUR    | 2.002795365 | 0.002836074 | 0.012662188 | 15.93572912 | 3.786355668 | Superficial | SOX2              |
| 128 | CD44     | 1.998034871 | 0.000506425 | 0.007178523 | 61.11347514 | 19.65892181 | Superficial | SOX2              |
| 129 | PPARG    | 1.995811597 | 0.000401828 | 0.007176147 | 27.13150116 | 5.448962677 | Superficial | SOX2, KLF5        |
| 130 | PDLIM4   | 1.989624172 | 0.000317696 | 0.007176147 | 69.2066852  | 25.82174452 | Superficial | SOX2, SOX2 + KLF5 |
| 131 | C16orf74 | 1.983715146 | 0.005105016 | 0.018023407 | 23.21339782 | 4.600880205 | Superficial | SOX2              |
| 132 | NUAK2    | 1.98293209  | 0.001232925 | 0.008679903 | 43.77931763 | 10.90822545 | Superficial | SOX2 + KLF5       |
| 133 | KLK7     | 1.977463828 | 0.001883197 | 0.010234018 | 66.73816902 | 34.01620165 | Superficial | SOX2              |
| 134 | LPCAT4   | 1.972938051 | 0.000795824 | 0.007615337 | 62.90111134 | 20.64436002 | Superficial | SOX2 + KLF5, SOX2 |
| 135 | RIPK2    | 1.966802897 | 0.000795824 | 0.007615337 | 24.08933789 | 4.963363477 | Superficial | SOX2              |
| 136 | VANGL2   | 1.960523499 | 0.005105016 | 0.018023407 | 9.102787321 | 1.461988544 | Superficial | SOX2              |
| 137 | KCTD12   | 1.956658379 | 0.000401828 | 0.010489143 | 15.00195718 | 2.947502003 | Suprabasal  | SOX2              |
| 138 | PLXNA1   | 1.956245434 | 0.002315114 | 0.011381143 | 13.16078784 | 2.350686874 | Superficial | SOX2              |
| 139 | UBE2Z    | 1.951186499 | 0.000506425 | 0.007178523 | 50.65988193 | 13.56189302 | Superficial | SOX2              |
| 140 | LRR8B    | 1.948757418 | 0.001526458 | 0.009387421 | 14.99469118 | 2.794121962 | Superficial | SOX2 + KLF5       |
| 141 | DUSP10   | 1.946963734 | 0.000992312 | 0.01142308  | 16.06853386 | 3.224143338 | Suprabasal  | SOX2              |
| 142 | MVP      | 1.941839212 | 0.000401828 | 0.007176147 | 51.13459459 | 14.41912597 | Superficial | SOX2              |
| 143 | TLE1     | 1.923101892 | 0.000119764 | 0.007176147 | 27.10808303 | 5.539944391 | Superficial | SOX2, SOX2 + KLF5 |
| 144 | CLMN     | 1.900395402 | 0.000401828 | 0.010489143 | 10.25851781 | 1.920383559 | Suprabasal  | SOX2              |

|              |             |              |             |             |              |             |                         |
|--------------|-------------|--------------|-------------|-------------|--------------|-------------|-------------------------|
| 145 BTBD11   | 1.881944659 | 0.000401828  | 0.007176147 | 32.29979612 | 7.660902713  | Superficial | SOX2                    |
| 146 UCK2     | 1.879818849 | 0.000506425  | 0.007178523 | 25.81261694 | 5.843574533  | Superficial | SOX2                    |
| 147 PRICKLE3 | 1.874661139 | 0.001232925  | 0.008679903 | 19.11973397 | 4.835371474  | Superficial | SOX2                    |
| 148 SGM52    | 1.870786282 | 0.000401828  | 0.007176147 | 35.5703333  | 7.638278866  | Superficial | SOX2 + KLF5, SOX2       |
| 149 FMN1     | 1.866940741 | 0.000992312  | 0.008042817 | 13.93481253 | 2.490917074  | Superficial | SOX2 + KLF5, SOX2       |
| 150 MBOAT1   | 1.856378922 | 0.004211401  | 0.016013117 | 20.12833534 | 4.645925894  | Superficial | SOX2                    |
| 151 PLCXD2   | 1.855577703 | 0.001883197  | 0.018415354 | 10.25091971 | 1.496509635  | Basal       | SOX2                    |
| 152 SLFN5    | 1.848849547 | 0.001232925  | 0.008679903 | 27.75619287 | 6.018649947  | Superficial | SOX2                    |
| 153 TRAK1    | 1.846069152 | 0.000401828  | 0.007176147 | 35.07851392 | 7.922600535  | Superficial | SOX2                    |
| 154 PLAG1    | 1.834621629 | 0.002315114  | 0.020052792 | 7.541644707 | 1.172226914  | Basal       | SOX2                    |
| 155 PCGF2    | 1.829922147 | 0.000401828  | 0.007176147 | 18.9966338  | 3.843979558  | Superficial | SOX2                    |
| 156 CFH      | 1.828796647 | 0.002315114  | 0.011381143 | 15.10224119 | 2.619784914  | Superficial | SOX2                    |
| 157 BPNT1    | 1.821261596 | 0.000119764  | 0.007176147 | 23.50791508 | 5.202532602  | Superficial | SOX2                    |
| 158 SERPINB5 | 1.819859014 | 0.000506425  | 0.007178523 | 67.98078257 | 28.24706043  | Superficial | SOX2, SOX2 + KLF5       |
| 159 VPS9D1   | 1.8139499   | 0.004211401  | 0.016013117 | 32.5671341  | 9.788833771  | Superficial | SOX2                    |
| 160 PARP14   | 1.810369034 | 0.005105016  | 0.018023407 | 38.26737244 | 7.373411595  | Superficial | SOX2                    |
| 161 PPIA3    | 1.808834433 | 0.000506425  | 0.007178523 | 14.42758209 | 3.603490342  | Superficial | SOX2                    |
| 162 HAPLN3   | 1.805854094 | 0.017811616  | 0.043066688 | 9.09934586  | 1.590747789  | Superficial | SOX2                    |
| 163 SLC26A2  | 1.800102188 | 0.0001526458 | 0.009387421 | 45.30830537 | 11.39121798  | Superficial | SOX2                    |
| 164 RHBDF2   | 1.7980639   | 0.000317696  | 0.007176147 | 22.85167975 | 5.481160876  | Superficial | SOX2                    |
| 165 EPB41L1  | 1.793989519 | 0.001232925  | 0.008679903 | 42.29613711 | 10.905373002 | Superficial | SOX2                    |
| 166 LZTS2    | 1.792350541 | 0.000795824  | 0.007615337 | 21.57360734 | 4.784089227  | Superficial | SOX2                    |
| 167 DUOX1    | 1.791874816 | 0.000250281  | 0.007176147 | 78.09045313 | 40.85380185  | Superficial | SOX2                    |
| 168 RGS2     | 1.791283961 | 0.012681065  | 0.033478436 | 25.73956524 | 5.400301716  | Superficial | SOX2                    |
| 169 CDH1     | 1.790786868 | 0.000196466  | 0.007176147 | 66.43421356 | 23.36472372  | Superficial | SOX2                    |
| 170 FLNB     | 1.789509468 | 0.000795824  | 0.007615337 | 41.12314191 | 11.05496167  | Superficial | SOX2                    |
| 171 ACSL5    | 1.783440086 | 0.006166656  | 0.027303057 | 11.74714312 | 2.411107733  | Suprabasal  | SOX2                    |
| 172 EFNA3    | 1.780245834 | 0.000317696  | 0.007176147 | 27.72683451 | 6.791475493  | Superficial | SOX2                    |
| 173 MX1      | 1.775059796 | 0.000992312  | 0.008042817 | 52.23414703 | 14.14516091  | Superficial | SOX2                    |
| 174 HSPA4L   | 1.774195024 | 0.000992312  | 0.008042817 | 44.30957301 | 11.98002916  | Superficial | SOX2                    |
| 175 NMI      | 1.773761102 | 0.002315114  | 0.011381143 | 47.10510036 | 12.99264976  | Superficial | SOX2                    |
| 176 TMED8    | 1.76610339  | 0.000795824  | 0.007615337 | 9.847590848 | 1.882202548  | Superficial | SOX2                    |
| 177 ACTN1    | 1.757688537 | 0.000992312  | 0.008042817 | 49.01098628 | 14.15301096  | Superficial | SOX2                    |
| 178 ARHGAP26 | 1.751173085 | 7.20E-05     | 0.007176147 | 19.94818841 | 4.677088953  | Superficial | SOX2 + KLF5             |
| 179 RAB40B   | 1.750815018 | 0.002315114  | 0.011381143 | 29.68013769 | 6.615881291  | Superficial | SOX2                    |
| 180 LITAF    | 1.746481223 | 0.000317696  | 0.010489143 | 65.22896326 | 21.81166448  | Suprabasal  | SOX2, SOX2 + KLF5       |
| 181 BIK      | 1.744369223 | 0.001526458  | 0.016792744 | 17.82374359 | 4.38678935   | Basal       | SOX2                    |
| 182 LMTK3    | 1.740611516 | 0.000401828  | 0.007176147 | 31.40700303 | 7.955807442  | Superficial | SOX2                    |
| 183 PCP4L1   | 1.738642273 | 0.002315114  | 0.020052792 | 8.98214398  | 2.87134725   | Basal       | KLF5                    |
| 184 TRIM34   | 1.734596734 | 0.002257606  | 0.011381143 | 12.00649374 | 2.23866282   | Superficial | SOX2                    |
| 185 DUSP7    | 1.73342227  | 0.0005105016 | 0.018023407 | 26.21992767 | 6.095908265  | Superficial | SOX2                    |
| 186 IGF2R    | 1.719942816 | 0.000992312  | 0.008042817 | 48.48639949 | 13.65241974  | Superficial | SOX2 + KLF5, SOX2       |
| 187 UBR1     | 1.719522138 | 0.000196466  | 0.007176147 | 14.06178488 | 2.530448228  | Superficial | SOX2                    |
| 188 SMAD7    | 1.715565935 | 0.000317696  | 0.010489143 | 23.33039354 | 6.328498368  | Suprabasal  | SOX2                    |
| 189 CFAP45   | 1.713651152 | 0.008904627  | 0.034252903 | 3.768521822 | 1.162924672  | Suprabasal  | SOX2                    |
| 190 PSMB9    | 1.713579321 | 0.001883197  | 0.014679007 | 46.76968644 | 13.20609663  | Suprabasal  | SOX2                    |
| 191 RAD50    | 1.709565758 | 0.000250281  | 0.007176147 | 41.71108638 | 10.58867033  | Superficial | SOX2                    |
| 192 ARGFGEF1 | 1.709561526 | 5.55E-05     | 0.007176147 | 59.31506671 | 18.23150087  | Superficial | SOX2                    |
| 193 PCCA     | 1.708003858 | 0.000250281  | 0.007176147 | 25.73152384 | 5.309542158  | Superficial | SOX2                    |
| 194 TNIK     | 1.706346895 | 0.017811616  | 0.043066688 | 5.392242583 | 0.752506829  | Superficial | SOX2                    |
| 195 ITGAV    | 1.702941913 | 0.000317696  | 0.007176147 | 28.00302136 | 5.643803668  | Superficial | SOX2                    |
| 196 NAB2     | 1.702282164 | 0.000401828  | 0.007176147 | 9.914356536 | 2.392261266  | Superficial | SOX2                    |
| 197 PITRM1   | 1.702119527 | 0.002315114  | 0.011381143 | 39.3035774  | 9.553439545  | Superficial | SOX2                    |
| 198 GALNT7   | 1.696244002 | 0.000317696  | 0.007176147 | 53.0088514  | 14.34898878  | Superficial | KLF5                    |
| 199 FAM3C    | 1.6929743   | 0.000992312  | 0.008042817 | 62.57202139 | 21.71212462  | Superficial | SOX2, SOX2 + KLF5       |
| 200 CARNMT1  | 1.69008525  | 0.000635975  | 0.007274975 | 27.23772045 | 6.517738001  | Superficial | SOX2                    |
| 201 PLXNB1   | 1.689316796 | 0.000635975  | 0.007274975 | 28.19070091 | 8.442735153  | Superficial | SOX2                    |
| 202 AQP3     | 1.688886054 | 0.000635975  | 0.007274975 | 88.79367883 | 56.05032049  | Superficial | SOX2                    |
| 203 MAOA     | 1.687062072 | 0.000250281  | 0.007176147 | 53.15988498 | 16.42076969  | Superficial | SOX2                    |
| 204 PLEKHA7  | 1.686755148 | 0.000635975  | 0.007274975 | 50.68256995 | 15.01051921  | Superficial | SOX2                    |
| 205 BHLHE40  | 1.683975933 | 0.000250281  | 0.012455402 | 66.70715515 | 29.07714623  | Basal       | SOX2                    |
| 206 TMEM268  | 1.683413946 | 0.000795824  | 0.007615337 | 6.305050499 | 1.013843833  | Superficial | SOX2                    |
| 207 RGS12    | 1.679974365 | 0.000196466  | 0.007176147 | 52.44813675 | 16.05946172  | Superficial | SOX2                    |
| 208 FAM3B    | 1.679634197 | 0.000401828  | 0.007176147 | 76.76679222 | 41.20933182  | Superficial | SOX2, KLF5              |
| 209 FAM83C   | 1.679177088 | 0.000992312  | 0.008042817 | 34.67295623 | 9.58995339   | Superficial | SOX2                    |
| 210 USP54    | 1.677511187 | 0.001883197  | 0.010234018 | 48.22455818 | 13.1742308   | Superficial | SOX2                    |
| 211 NRARP    | 1.676776951 | 0.001526458  | 0.009387421 | 59.48866715 | 22.43678013  | Superficial | SOX2                    |
| 212 VANGL1   | 1.674308055 | 0.000992312  | 0.008042817 | 26.754429   | 5.911651905  | Superficial | SOX2                    |
| 213 CD9      | 1.664880927 | 0.000317696  | 0.007176147 | 95.7959489  | 87.17960747  | Superficial | SOX2 + KLF5, SOX2       |
| 214 SIPA1L1  | 1.662110852 | 9.30E-05     | 0.007176147 | 45.53935844 | 12.70121283  | Superficial | SOX2                    |
| 215 FZD1     | 1.660406189 | 0.000401828  | 0.007176147 | 15.36367518 | 3.652475248  | Superficial | SOX2                    |
| 216 DSG3     | 1.659685097 | 0.000401828  | 0.007176147 | 76.2731689  | 37.72281451  | Superficial | KLF5, SOX2 + KLF5, SOX2 |
| 217 FAM83G   | 1.655884408 | 0.001883197  | 0.010234018 | 35.56417675 | 10.87087784  | Superficial | SOX2                    |

|               |             |             |             |             |             |             |                   |
|---------------|-------------|-------------|-------------|-------------|-------------|-------------|-------------------|
| 218 ADCY7     | 1.655709863 | 0.002836074 | 0.012662188 | 26.2365789  | 5.391710904 | Superficial | SOX2              |
| 219 MDGA1     | 1.649359333 | 0.005105016 | 0.024262694 | 6.424994564 | 1.914752811 | Suprabasal  | SOX2              |
| 220 CEACAM6   | 1.648410896 | 0.001232925 | 0.015721789 | 14.47583323 | 4.150146377 | Basal       | SOX2              |
| 221 ATP2C1    | 1.646785429 | 0.000401828 | 0.007176147 | 34.44258344 | 8.519262101 | Superficial | SOX2              |
| 222 TCF7L2    | 1.645495297 | 0.000635975 | 0.007274975 | 24.10556753 | 5.483411759 | Superficial | SOX2              |
| 223 DEF6      | 1.643050311 | 0.000401828 | 0.007176147 | 22.74032432 | 5.806535233 | Superficial | SOX2              |
| 224 ERI1      | 1.638743032 | 0.000795824 | 0.007615337 | 19.59835376 | 5.244473791 | Superficial | SOX2              |
| 225 E2F8      | 1.632929528 | 0.002836074 | 0.012662188 | 19.05196528 | 4.16204622  | Superficial | SOX2              |
| 226 PRDM1     | 1.628753891 | 0.005105016 | 0.029792864 | 9.74035703  | 2.23802724  | Basal       | SOX2              |
| 227 WNT5A     | 1.626161756 | 0.000401828 | 0.007176147 | 40.61458636 | 11.46950904 | Superficial | SOX2              |
| 228 ACSL1     | 1.625384316 | 0.006166656 | 0.020290909 | 45.16007735 | 13.44840278 | Superficial | SOX2              |
| 229 IFIT2     | 1.625274549 | 0.021001058 | 0.04834985  | 7.148106854 | 1.150788534 | Superficial | SOX2              |
| 230 AEBP2     | 1.622302638 | 0.000795824 | 0.007615337 | 39.97302843 | 9.842466958 | Superficial | SOX2              |
| 231 STF6      | 1.612517544 | 0.000795824 | 0.007615337 | 41.35112964 | 11.00713868 | Superficial | SOX2              |
| 232 TEX       | 1.60997414  | 0.007423146 | 0.030449933 | 15.90490035 | 4.406701305 | Suprabasal  | SOX2              |
| 233 ZNF326    | 1.607653042 | 0.000119764 | 0.007176147 | 58.61505907 | 18.15590786 | Superficial | SOX2              |
| 234 CASK      | 1.607623668 | 0.000317696 | 0.007176147 | 25.64028894 | 6.432160107 | Superficial | SOX2              |
| 235 STAT6     | 1.605855949 | 0.000992312 | 0.008042817 | 35.45387829 | 11.31713013 | Superficial | SOX2              |
| 236 NECTIN1   | 1.600704419 | 0.000992312 | 0.008042817 | 62.49026247 | 22.13619408 | Superficial | SOX2              |
| 237 LDLRAD3   | 1.598177175 | 0.000795824 | 0.007615337 | 13.15101248 | 2.23742001  | Superficial | SOX2              |
| 238 SIRT6     | 1.593566613 | 0.003462059 | 0.014108599 | 11.50078903 | 3.946469396 | Superficial | SOX2              |
| 239 ADGRG1    | 1.588484691 | 0.002315114 | 0.011381143 | 40.98278712 | 11.67161753 | Superficial | SOX2              |
| 240 MACF1     | 1.585172836 | 0.001883197 | 0.010234018 | 45.42867422 | 13.42301982 | Superficial | SOX2 + KLF5, SOX2 |
| 241 KALRN     | 1.568401192 | 0.001232925 | 0.008679903 | 39.89066692 | 11.36810286 | Superficial | SOX2              |
| 242 EFNA1     | 1.567624298 | 0.000250281 | 0.007176147 | 35.81170057 | 9.972419373 | Superficial | SOX2              |
| 243 SIAH2     | 1.561358934 | 0.000506425 | 0.007178523 | 54.29178907 | 18.17855221 | Superficial | SOX2              |
| 244 MMP7      | 1.555620236 | 0.000795824 | 0.007615337 | 74.5401543  | 35.82324735 | Superficial | SOX2              |
| 245 LRIG3     | 1.554041648 | 0.001526458 | 0.009387421 | 16.87745803 | 4.27268611  | Superficial | SOX2              |
| 246 CBLC      | 1.550539974 | 0.000795824 | 0.007615337 | 54.08040173 | 16.73185142 | Superficial | SOX2              |
| 247 RAPGEFL1  | 1.546741477 | 0.000635975 | 0.007274975 | 59.0466891  | 21.22229912 | Superficial | KLF5, SOX2        |
| 248 NBEAL2    | 1.543643779 | 0.001526458 | 0.009387421 | 66.32498761 | 27.02085762 | Superficial | SOX2              |
| 249 TMPRSS11D | 1.540082196 | 0.008904627 | 0.040392504 | 18.5208653  | 5.78738771  | Basal       | SOX2 + KLF5       |
| 250 CYB561D1  | 1.539648021 | 0.003462059 | 0.014108599 | 15.63686224 | 3.624462484 | Superficial | SOX2              |
| 251 DYRK2     | 1.537828927 | 0.000317696 | 0.007176147 | 30.61055724 | 7.976776919 | Superficial | SOX2              |
| 252 EGR2      | 1.532135907 | 0.010644787 | 0.029507311 | 8.930218254 | 2.317618094 | Superficial | SOX2              |
| 253 UNC5B     | 1.532021274 | 0.004211401 | 0.016013117 | 21.54159413 | 7.012623892 | Superficial | SOX2              |
| 254 EGR1      | 1.531257162 | 0.000401828 | 0.007176147 | 77.3750348  | 37.25352246 | Superficial | SOX2              |
| 255 ID4       | 1.529712713 | 0.005105016 | 0.018023407 | 61.2478735  | 25.59836537 | Superficial | SOX2              |
| 256 NRIP1     | 1.527774608 | 0.000992312 | 0.008042817 | 31.56908623 | 8.02702205  | Superficial | SOX2, SOX2 + KLF5 |
| 257 SETBP1    | 1.526392337 | 0.000795824 | 0.007615337 | 12.37924636 | 2.847820355 | Superficial | SOX2 + KLF5, SOX2 |
| 258 CTNBP2    | 1.523952442 | 0.001526458 | 0.009387421 | 38.23349606 | 9.953505753 | Superficial | SOX2              |
| 259 ZNF750    | 1.521825816 | 0.000635975 | 0.007274975 | 71.74142611 | 34.19483123 | Superficial | SOX2              |
| 260 ROBO1     | 1.521395177 | 0.002315114 | 0.011381143 | 20.09483419 | 4.223508011 | Superficial | SOX2              |
| 261 SERPINB2  | 1.520402251 | 0.001232925 | 0.015721789 | 56.47425191 | 25.15403273 | Basal       | SOX2 + KLF5       |
| 262 DLG5      | 1.520094924 | 0.000795824 | 0.010838271 | 31.97247699 | 10.87101714 | Suprabasal  | SOX2              |
| 263 USP32     | 1.513329317 | 0.000992312 | 0.008042817 | 27.57071909 | 6.844546538 | Superficial | SOX2              |
| 264 MBTPS1    | 1.5075199   | 0.000992312 | 0.008042817 | 40.77920392 | 12.36148303 | Superficial | SOX2              |
| 265 SPTBN2    | 1.507423391 | 0.000635975 | 0.007274975 | 45.72760689 | 15.53689929 | Superficial | SOX2              |
| 266 MYH14     | 1.506036602 | 0.000635975 | 0.007274975 | 65.02307798 | 27.62556019 | Superficial | SOX2, SOX2 + KLF5 |
| 267 TTC39B    | 1.504724353 | 0.000153669 | 0.007176147 | 31.35300257 | 8.277748331 | Superficial | SOX2              |
| 268 PPFIBP2   | 1.502913882 | 0.000506425 | 0.007178523 | 38.08840061 | 10.11643122 | Superficial | SOX2              |
| 269 PARP9     | 1.497471188 | 0.002836074 | 0.012662188 | 45.0973443  | 13.68164257 | Superficial | SOX2              |
| 270 MCC       | 1.495164205 | 0.001232925 | 0.008679903 | 33.17844453 | 9.480764163 | Superficial | SOX2, SOX2 + KLF5 |
| 271 SLC16A7   | 1.492659835 | 0.000317696 | 0.007176147 | 36.68869929 | 10.26325143 | Superficial | SOX2 + KLF5       |
| 272 KIAA1522  | 1.491037323 | 0.000795824 | 0.007615337 | 57.95200293 | 21.15180697 | Superficial | SOX2              |
| 273 CTF1      | 1.489903466 | 0.015054848 | 0.038009884 | 6.497786284 | 2.532560526 | Superficial | SOX2              |
| 274 ZFYVE28   | 1.489529705 | 0.004211401 | 0.016013117 | 11.28814489 | 2.205883735 | Superficial | SOX2              |
| 275 MARK2     | 1.485849189 | 0.000795824 | 0.007615337 | 64.26837362 | 27.57208954 | Superficial | SOX2              |
| 276 ZNF512B   | 1.482940443 | 0.000153669 | 0.007176147 | 14.48764198 | 3.998364131 | Superficial | SOX2              |
| 277 EEA1      | 1.479639763 | 0.000196466 | 0.007176147 | 68.01721549 | 26.67149732 | Superficial | SOX2 + KLF5, SOX2 |
| 278 ANG       | 1.470912351 | 0.017811616 | 0.043066688 | 10.58303921 | 2.925742081 | Superficial | SOX2              |
| 279 SPTPIP2   | 1.470147182 | 0.000153669 | 0.007176147 | 20.22059631 | 3.435694389 | Superficial | SOX2              |
| 280 GLS       | 1.46994638  | 0.000119764 | 0.007176147 | 24.94966084 | 6.436039892 | Superficial | SOX2              |
| 281 ACADSB    | 1.46729936  | 0.000635975 | 0.007274975 | 33.22753084 | 7.725227649 | Superficial | SOX2              |
| 282 TAPBP     | 1.462687605 | 0.002315114 | 0.011381143 | 60.46527377 | 23.25742706 | Superficial | SOX2              |
| 283 TMC6      | 1.459446866 | 0.003462059 | 0.014108599 | 33.19438017 | 10.41223051 | Superficial | SOX2              |
| 284 ATF3      | 1.4580875   | 0.003462059 | 0.014108599 | 64.8069383  | 31.24154827 | Superficial | SOX2              |
| 285 GPAT4     | 1.454502053 | 0.001232925 | 0.008679903 | 16.79760858 | 4.655621659 | Superficial | SOX2              |
| 286 P2RY2     | 1.454448709 | 0.001883197 | 0.010234018 | 26.87639549 | 8.337861884 | Superficial | SOX2              |
| 287 NR2F2     | 1.453940982 | 0.000250281 | 0.007176147 | 7.515066166 | 1.627785245 | Superficial | SOX2              |
| 288 KLF4      | 1.451647249 | 0.000317696 | 0.007176147 | 74.16657085 | 38.12955866 | Superficial | SOX2 + KLF5       |
| 289 PPARGC1B  | 1.451020759 | 0.010644787 | 0.029507311 | 17.5730362  | 4.146815669 | Superficial | KLF5              |
| 290 MARK1     | 1.450576993 | 0.005105016 | 0.018023407 | 11.31410423 | 2.61341336  | Superficial | SOX2              |

|               |             |             |             |             |             |             |                   |
|---------------|-------------|-------------|-------------|-------------|-------------|-------------|-------------------|
| 291 ACVR2A    | 1.449181971 | 0.000795824 | 0.007615337 | 30.56926601 | 7.030736758 | Superficial | SOX2              |
| 292 EFS       | 1.443933494 | 0.001526458 | 0.009387421 | 29.99052364 | 9.591608224 | Superficial | SOX2              |
| 293 FOSL1     | 1.44377816  | 0.012681065 | 0.049425568 | 19.99797835 | 6.879080718 | Basal       | SOX2              |
| 294 SOX9      | 1.443054728 | 0.003462059 | 0.024854712 | 24.37891667 | 6.330952656 | Basal       | SOX2              |
| 295 RAB11FIP1 | 1.442200578 | 0.000317696 | 0.012455402 | 44.59727837 | 19.1411243  | Basal       | SOX2, SOX2 + KLF5 |
| 296 EXT1      | 1.436512243 | 0.002836074 | 0.012662188 | 13.54263902 | 3.548045055 | Superficial | SOX2              |
| 297 GBP3      | 1.435078234 | 0.002836074 | 0.012662188 | 39.4589241  | 11.77543464 | Superficial | SOX2              |
| 298 AGPAT5    | 1.429902007 | 0.001883197 | 0.010234018 | 27.61419053 | 6.879942189 | Superficial | SOX2              |
| 299 TJP2      | 1.428786705 | 0.000250281 | 0.012455402 | 37.63135572 | 12.37153651 | Basal       | SOX2, SOX2 + KLF5 |
| 300 MYO1B     | 1.424682138 | 0.000795824 | 0.0136425   | 35.06249235 | 12.49455715 | Basal       | SOX2              |
| 301 WRN       | 1.422447463 | 0.000317696 | 0.007176147 | 12.03213883 | 2.82000383  | Superficial | SOX2              |
| 302 MTSS1     | 1.414208577 | 7.20E-05    | 0.007176147 | 56.05422812 | 18.62672861 | Superficial | SOX2              |
| 303 RARA      | 1.414049556 | 0.007423146 | 0.022959455 | 10.0578091  | 1.361551578 | Superficial | SOX2              |
| 304 CELSR2    | 1.412827235 | 0.001883197 | 0.010234018 | 32.83846129 | 8.471091898 | Superficial | SOX2              |
| 305 TMEM62    | 1.41211041  | 0.000401828 | 0.007176147 | 15.85865511 | 4.494080284 | Superficial | SOX2              |
| 306 ATP1A1    | 1.410743248 | 0.002836074 | 0.012662188 | 54.54542011 | 19.58899334 | Superficial | SOX2              |
| 307 KDM6B     | 1.410464515 | 0.000635975 | 0.007274975 | 26.18538702 | 7.047815    | Superficial | SOX2              |
| 308 AHR       | 1.409902398 | 0.000196466 | 0.010489143 | 37.6195811  | 12.92727326 | Suprabasal  | SOX2              |
| 309 FAM83B    | 1.409210634 | 0.005105016 | 0.018023407 | 24.44070299 | 5.677640141 | Superficial | SOX2, SOX2 + KLF5 |
| 310 IL15RA    | 1.405856308 | 0.000992312 | 0.01142308  | 8.983045649 | 2.947652454 | Suprabasal  | SOX2              |
| 311 TRNP1     | 1.39874506  | 0.001526458 | 0.016792744 | 26.25894725 | 8.679371806 | Basal       | SOX2              |
| 312 IGSF9     | 1.397302481 | 0.015054848 | 0.038009884 | 10.74871348 | 2.239511216 | Superficial | SOX2              |
| 313 B3GALNT2  | 1.394665908 | 0.000317696 | 0.007176147 | 23.68419665 | 6.990842078 | Superficial | SOX2              |
| 314 ANGPTL4   | 1.390767663 | 9.30E-05    | 0.012455402 | 16.31586531 | 4.670732675 | Basal       | SOX2 + KLF5, SOX2 |
| 315 GFOD1     | 1.385270232 | 0.001883197 | 0.010234018 | 23.04950039 | 5.817350747 | Superficial | SOX2              |
| 316 PPPP      | 1.384548287 | 0.004211401 | 0.021879278 | 16.77886912 | 4.832901743 | Suprabasal  | SOX2              |
| 317 DUOX1     | 1.37848433  | 0.000401828 | 0.012455402 | 48.21228319 | 19.71710377 | Basal       | SOX2              |
| 318 EDUC4     | 1.373595403 | 0.000980874 | 0.008042817 | 19.45990268 | 5.084122399 | Superficial | SOX2              |
| 319 PRCP      | 1.372815391 | 0.000506425 | 0.007178523 | 51.28852932 | 17.1700345  | Superficial | SOX2              |
| 320 KDM4A     | 1.368537175 | 0.000506425 | 0.007178523 | 21.96859569 | 4.670725141 | Superficial | SOX2              |
| 321 AHCTF1    | 1.364426399 | 0.000992312 | 0.008042817 | 20.42186335 | 4.885164396 | Superficial | SOX2              |
| 322 CDCC51    | 1.364414193 | 0.006166656 | 0.020290909 | 30.08544728 | 9.187453014 | Superficial | SOX2              |
| 323 GBF1      | 1.363385147 | 0.000992312 | 0.008042817 | 37.52272583 | 12.18132941 | Superficial | SOX2              |
| 324 CIB1      | 1.359374292 | 0.000635975 | 0.007274975 | 71.89402045 | 37.61930816 | Superficial | SOX2              |
| 325 ZBTB40    | 1.357638761 | 0.001526458 | 0.009387421 | 9.441108813 | 1.982079465 | Superficial | SOX2              |
| 326 PDK3      | 1.356669527 | 0.001232925 | 0.008679903 | 15.30966875 | 4.188927431 | Superficial | SOX2              |
| 327 UBE2L6    | 1.353073987 | 0.001526458 | 0.009387421 | 34.95959257 | 8.921171972 | Superficial | SOX2              |
| 328 ANXA8L1   | 1.352486799 | 0.000506425 | 0.007178523 | 31.13710693 | 8.787587644 | Superficial | SOX2              |
| 329 ETS2      | 1.348438538 | 0.000506425 | 0.010489143 | 70.5467627  | 37.00163852 | Suprabasal  | SOX2, SOX2 + KLF5 |
| 330 ZNF316    | 1.346975294 | 0.000506425 | 0.007178523 | 14.80715013 | 4.977715972 | Superficial | SOX2              |
| 331 PPFIA1    | 1.345698612 | 5.55E-05    | 0.007176147 | 34.56770634 | 9.912383496 | Superficial | SOX2              |
| 332 NUP205    | 1.342293498 | 0.000401828 | 0.007176147 | 14.31714078 | 4.145322997 | Superficial | SOX2              |
| 333 TMEM129   | 1.341297541 | 0.003462059 | 0.014108599 | 15.54081075 | 4.998039805 | Superficial | SOX2              |
| 334 KRT6A     | 1.338300874 | 0.007423146 | 0.036548425 | 70.83206676 | 49.5782978  | Basal       | SOX2              |
| 335 UTP20     | 1.338154756 | 0.003462059 | 0.014108599 | 13.15682885 | 2.679443984 | Superficial | SOX2              |
| 336 CERS3     | 1.336695002 | 0.000992312 | 0.008042817 | 66.75354368 | 27.89605679 | Superficial | KLF5, SOX2        |
| 337 PHF2      | 1.333360461 | 0.000506425 | 0.007178523 | 18.51205223 | 4.924088628 | Superficial | SOX2              |
| 338 SOWAHB    | 1.330616268 | 0.000506425 | 0.010489143 | 19.25278672 | 6.539010872 | Suprabasal  | SOX2              |
| 339 UBE2O     | 1.32923008  | 0.012681065 | 0.033478436 | 10.25200313 | 3.090639077 | Superficial | SOX2              |
| 340 SEMA4B    | 1.328875176 | 0.005105016 | 0.018023407 | 40.34899141 | 14.00945595 | Superficial | SOX2              |
| 341 MUC15     | 1.328370967 | 0.000506425 | 0.007178523 | 59.25483221 | 20.34713306 | Superficial | SOX2              |
| 342 TSHZ1     | 1.32797418  | 0.000795824 | 0.007615337 | 17.38245968 | 4.734116887 | Superficial | SOX2              |
| 343 SLC30A4   | 1.324891857 | 0.000992312 | 0.008042817 | 15.57983981 | 4.129145692 | Superficial | SOX2              |
| 344 PLAC8     | 1.321845779 | 0.008904627 | 0.040392504 | 23.19185551 | 9.186900909 | Basal       | SOX2              |
| 345 PROS1     | 1.320692718 | 0.001232925 | 0.008679903 | 16.76337057 | 4.722148576 | Superficial | SOX2              |
| 346 QRSL1     | 1.319743783 | 0.000196466 | 0.007176147 | 15.55650242 | 4.687149578 | Superficial | SOX2              |
| 347 OCIAD2    | 1.31691942  | 0.000795824 | 0.007615337 | 50.38690675 | 15.63470735 | Superficial | SOX2 + KLF5       |
| 348 MUC1      | 1.316339356 | 0.008904627 | 0.040392504 | 16.0412245  | 4.959969675 | Basal       | KLF5, SOX2        |
| 349 PAK6      | 1.316197272 | 0.005105016 | 0.018023407 | 17.81476293 | 5.584040472 | Superficial | SOX2              |
| 350 RNASE4    | 1.314834402 | 0.005094082 | 0.018023407 | 12.16976102 | 3.108359674 | Superficial | SOX2              |
| 351 ARHGAP18  | 1.313208605 | 0.001526458 | 0.009387421 | 17.67087429 | 4.49131787  | Superficial | SOX2, SOX2 + KLF5 |
| 352 TOP2B     | 1.312446793 | 0.000795824 | 0.007615337 | 39.86008267 | 11.05700902 | Superficial | SOX2              |
| 353 MARVELD2  | 1.312375904 | 0.000317696 | 0.007176147 | 28.05964149 | 9.039323031 | Superficial | SOX2              |
| 354 ERC1      | 1.308852525 | 0.000992312 | 0.008042817 | 39.6157528  | 12.99023703 | Superficial | SOX2 + KLF5, SOX2 |
| 355 TMEM132A  | 1.306731913 | 0.000250281 | 0.007176147 | 36.14513057 | 9.791551434 | Superficial | SOX2              |
| 356 TMEM125   | 1.305306728 | 0.000635975 | 0.007274975 | 31.74072791 | 10.27266171 | Superficial | SOX2              |
| 357 ATP2A2    | 1.30393959  | 0.002836074 | 0.012662188 | 67.33126411 | 29.68867078 | Superficial | SOX2              |
| 358 GSTO1     | 1.30389326  | 0.002315114 | 0.011381143 | 58.6348769  | 23.03531844 | Superficial | KLF5              |
| 359 SOX13     | 1.301876207 | 0.004211401 | 0.016013117 | 13.72289931 | 3.118639101 | Superficial | SOX2 + KLF5, SOX2 |
| 360 RCC1L     | 1.30181624  | 0.000795824 | 0.007615337 | 28.93228558 | 8.302303983 | Superficial | SOX2              |
| 361 PI4K2B    | 1.301679821 | 0.004211401 | 0.016013117 | 19.88158248 | 4.693846417 | Superficial | SOX2              |
| 362 NBN       | 1.293606262 | 0.000317696 | 0.007176147 | 40.2244907  | 12.58433084 | Superficial | SOX2              |
| 363 EPHA1     | 1.292228293 | 0.000795824 | 0.007615337 | 47.17389356 | 15.8337107  | Superficial | SOX2              |

|     |          |             |             |             |             |             |             |                         |
|-----|----------|-------------|-------------|-------------|-------------|-------------|-------------|-------------------------|
| 364 | CBX6     | 1.29167696  | 0.002315114 | 0.011381143 | 31.83148599 | 10.1731285  | Superficial | SOX2                    |
| 365 | TMPRSS4  | 1.291648313 | 0.000317696 | 0.012455402 | 52.64854085 | 22.60403832 | Basal       | SOX2, KLF5, SOX2 + KLF5 |
| 366 | PDE4D    | 1.288243    | 0.003462059 | 0.014108599 | 11.39595236 | 2.129328554 | Superficial | SOX2, SOX2 + KLF5       |
| 367 | DBNDD2   | 1.286934243 | 0.001219203 | 0.008679903 | 49.89250831 | 17.33137271 | Superficial | SOX2                    |
| 368 | IRX2     | 1.284964767 | 5.55E-05    | 0.007176147 | 13.28747174 | 3.955746035 | Superficial | SOX2                    |
| 369 | PTPRF    | 1.283332755 | 0.001883197 | 0.010234018 | 54.86782032 | 19.86110899 | Superficial | SOX2                    |
| 370 | RNGTT    | 1.281199467 | 0.000250281 | 0.007176147 | 27.16286848 | 7.841618321 | Superficial | SOX2                    |
| 371 | PLA2G4B  | 1.280849172 | 0.017698983 | 0.043066688 | 29.65748348 | 11.18833209 | Superficial | SOX2                    |
| 372 | CDC42EP1 | 1.280809566 | 0.000506425 | 0.012898798 | 49.93940725 | 20.79124099 | Basal       | SOX2                    |
| 373 | ARL5B    | 1.2806538   | 0.002315114 | 0.011381143 | 38.32525881 | 10.54936115 | Superficial | SOX2                    |
| 374 | FAM135A  | 1.278999435 | 0.000992312 | 0.008042817 | 63.70652239 | 28.27070091 | Superficial | SOX2                    |
| 375 | RAPGEF5  | 1.278312014 | 0.000153669 | 0.010489143 | 38.66857075 | 15.89877526 | Suprabasal  | SOX2, SOX2 + KLF5       |
| 376 | PAK4     | 1.278029191 | 0.000153669 | 0.007176147 | 36.06503889 | 11.77443905 | Superficial | SOX2                    |
| 377 | SPRYD3   | 1.277772516 | 0.000992312 | 0.008042817 | 24.20572055 | 6.994672203 | Superficial | SOX2                    |
| 378 | FGRF3    | 1.277577146 | 0.004211401 | 0.016013117 | 43.50353723 | 15.34914819 | Superficial | SOX2, KLF5              |
| 379 | LSR      | 1.271662219 | 0.001526458 | 0.009387421 | 59.20009736 | 22.67903464 | Superficial | SOX2                    |
| 380 | PARG     | 1.267231595 | 0.000153669 | 0.007176147 | 18.63111661 | 5.046069019 | Superficial | SOX2                    |
| 381 | GSDMC    | 1.265904005 | 0.001526458 | 0.009387421 | 51.45721865 | 18.99913397 | Superficial | KLF5                    |
| 382 | RANGAP1  | 1.262746573 | 0.001883197 | 0.010234018 | 39.92014309 | 12.52755039 | Superficial | SOX2                    |
| 383 | CTSD     | 1.261128396 | 0.000401828 | 0.007176147 | 87.81296053 | 60.78044895 | Superficial | SOX2                    |
| 384 | KDM1A    | 1.259944271 | 0.001883197 | 0.010234018 | 24.42107785 | 6.395816716 | Superficial | SOX2                    |
| 385 | SHROOM2  | 1.258271405 | 0.000635975 | 0.007274975 | 16.76833305 | 5.01205908  | Superficial | SOX2 + KLF5             |
| 386 | PTPN1    | 1.25765891  | 0.000506425 | 0.007178523 | 39.88181934 | 12.6414766  | Superficial | SOX2                    |
| 387 | MAP7D1   | 1.256968222 | 0.000795824 | 0.007615337 | 56.70640296 | 22.14215924 | Superficial | SOX2                    |
| 388 | FSCN1    | 1.256104721 | 0.001883197 | 0.010234018 | 24.7998747  | 6.980756334 | Superficial | SOX2                    |
| 389 | MID1     | 1.254097172 | 0.006166656 | 0.020290909 | 15.17176327 | 4.455197887 | Superficial | SOX2                    |
| 390 | LIN7C    | 1.25095532  | 0.005105016 | 0.018023407 | 43.72459786 | 13.99481155 | Superficial | SOX2                    |
| 391 | AP1S3    | 1.248619366 | 0.002836074 | 0.012662188 | 11.99405619 | 3.409620745 | Superficial | SOX2                    |
| 392 | SP110    | 1.247917051 | 0.002315114 | 0.011381143 | 19.79106955 | 6.139409573 | Superficial | SOX2, KLF5              |
| 393 | DTX3L    | 1.24559442  | 0.000795824 | 0.010838271 | 38.57229673 | 15.76772911 | Suprabasal  | SOX2                    |
| 394 | DAB2IP   | 1.245422489 | 0.001232925 | 0.012246384 | 23.98713205 | 8.994272101 | Suprabasal  | SOX2                    |
| 395 | METRNL   | 1.242786049 | 0.000317696 | 0.012455402 | 32.07582811 | 13.26662833 | Basal       | SOX2                    |
| 396 | FBLIM1   | 1.23859892  | 0.000992312 | 0.008042817 | 14.55913436 | 3.715759949 | Superficial | SOX2                    |
| 397 | CDK5R1   | 1.23645138  | 0.000635975 | 0.007274975 | 13.61044702 | 4.337751879 | Superficial | SOX2                    |
| 398 | BDP1     | 1.231393276 | 0.000250281 | 0.007176147 | 39.56516605 | 11.52677018 | Superficial | SOX2                    |
| 399 | SMARCA5  | 1.229865827 | 0.000153669 | 0.007176147 | 44.63132421 | 14.69604831 | Superficial | SOX2                    |
| 400 | ARHGFE1  | 1.222985993 | 0.002315114 | 0.011381143 | 18.69026155 | 5.468147191 | Superficial | SOX2                    |
| 401 | ANO9     | 1.222957452 | 0.006166656 | 0.020290909 | 11.72755418 | 4.158654321 | Superficial | KLF5, SOX2              |
| 402 | TMEM30B  | 1.222077703 | 0.001232925 | 0.008679903 | 42.12799768 | 12.74691984 | Superficial | SOX2                    |
| 403 | EVL      | 1.221452066 | 0.003462059 | 0.014108599 | 18.78014165 | 5.231162739 | Superficial | SOX2                    |
| 404 | BTC      | 1.219656775 | 0.001883197 | 0.010234018 | 23.18820738 | 7.421255007 | Superficial | SOX2                    |
| 405 | HYOU1    | 1.21822226  | 0.003462059 | 0.014108599 | 28.78499902 | 11.00331255 | Superficial | SOX2                    |
| 406 | MREG     | 1.217754559 | 0.000401828 | 0.012455402 | 27.45165405 | 10.06667687 | Basal       | SOX2 + KLF5, SOX2       |
| 407 | TFPI     | 1.217749911 | 0.008904627 | 0.040392504 | 20.46071555 | 6.988812663 | Basal       | SOX2                    |
| 408 | TFCP2    | 1.214854752 | 0.001883197 | 0.010234018 | 14.82542175 | 4.280428251 | Superficial | SOX2                    |
| 409 | NOTCH3   | 1.213496016 | 0.004211401 | 0.016013117 | 41.33700568 | 15.82539899 | Superficial | SOX2                    |
| 410 | MBOAT2   | 1.21344202  | 0.000795824 | 0.0136425   | 18.88332959 | 7.348331732 | Basal       | SOX2 + KLF5             |
| 411 | RGMA     | 1.21235656  | 0.000795824 | 0.007615337 | 26.3261414  | 8.690737267 | Superficial | SOX2                    |
| 412 | ROCK2    | 1.20861768  | 0.001232925 | 0.008679903 | 31.89008375 | 9.583988437 | Superficial | SOX2 + KLF5             |
| 413 | IL27RA   | 1.208220342 | 0.000795824 | 0.010838271 | 9.158256842 | 3.247951193 | Suprabasal  | SOX2                    |
| 414 | STK11IP  | 1.207708762 | 0.002836074 | 0.012662188 | 9.584264857 | 3.029777569 | Superficial | SOX2                    |
| 415 | PIP5K1   | 1.206931468 | 0.000317696 | 0.007176147 | 8.678543046 | 2.470109768 | Superficial | SOX2                    |
| 416 | MXRA7    | 1.20590904  | 0.006166656 | 0.020290909 | 30.70137793 | 7.885702193 | Superficial | SOX2                    |
| 417 | LIMA1    | 1.205072658 | 0.001232925 | 0.008679903 | 57.36614584 | 22.15407701 | Superficial | SOX2, SOX2 + KLF5       |
| 418 | P4HA2    | 1.203825583 | 0.002315114 | 0.011381143 | 29.25974961 | 9.077935764 | Superficial | SOX2                    |
| 419 | SLC25A24 | 1.202476433 | 0.002836074 | 0.012662188 | 31.87004604 | 9.835333136 | Superficial | SOX2 + KLF5             |
| 420 | E2F2     | 1.202226402 | 0.000401828 | 0.012455402 | 25.69220688 | 10.11018419 | Basal       | SOX2                    |
| 421 | NCS1     | 1.199970243 | 0.010644787 | 0.029507311 | 18.84944464 | 5.393233849 | Superficial | SOX2                    |
| 422 | ABCC5    | 1.199556541 | 0.000506425 | 0.010489143 | 47.79352163 | 22.35662642 | Suprabasal  | SOX2                    |
| 423 | VSNL1    | 1.198717733 | 0.002836074 | 0.012662188 | 41.90794306 | 13.72784784 | Superficial | SOX2                    |
| 424 | MUC20    | 1.197371809 | 0.006166656 | 0.032981404 | 17.33627206 | 6.009769404 | Basal       | SOX2, KLF5              |
| 425 | NIPAL4   | 1.196951548 | 0.015054848 | 0.038009884 | 5.624357538 | 1.930404675 | Superficial | SOX2                    |
| 426 | CYP4F12  | 1.196520524 | 0.010644787 | 0.029507311 | 28.25141081 | 8.950303583 | Superficial | SOX2                    |
| 427 | FHDC1    | 1.196319661 | 0.006166656 | 0.020290909 | 23.99616288 | 7.021853973 | Superficial | SOX2                    |
| 428 | SCNN1A   | 1.194828355 | 0.000992312 | 0.014320968 | 27.93955498 | 11.20588616 | Basal       | SOX2, KLF5              |
| 429 | ATP8A1   | 1.192565378 | 0.000635975 | 0.010733065 | 6.400921197 | 2.31669173  | Suprabasal  | SOX2 + KLF5             |
| 430 | MYO10    | 1.19168863  | 0.000635975 | 0.007274975 | 35.09234401 | 9.749988388 | Superficial | SOX2, SOX2 + KLF5       |
| 431 | AFF1     | 1.191217771 | 0.001526458 | 0.009387421 | 36.90037795 | 11.39818151 | Superficial | SOX2, SOX2 + KLF5       |
| 432 | MYCBP2   | 1.190959105 | 0.001232925 | 0.008679903 | 58.42803821 | 21.11847344 | Superficial | SOX2                    |
| 433 | CNNT3    | 1.190903852 | 0.002315114 | 0.011381143 | 68.37598759 | 34.32034018 | Superficial | SOX2, SOX2 + KLF5       |
| 434 | ANXA4    | 1.188849498 | 0.000635975 | 0.007274975 | 55.84232817 | 19.17807815 | Superficial | SOX2                    |
| 435 | MLLT3    | 1.18449493  | 0.002836074 | 0.012662188 | 15.62951055 | 4.585014268 | Superficial | SOX2, SOX2 + KLF5       |
| 436 | PTGS1    | 1.18264683  | 0.010644787 | 0.029507311 | 20.59203145 | 5.959216272 | Superficial | SOX2                    |

|     |          |             |             |             |             |             |             |                   |
|-----|----------|-------------|-------------|-------------|-------------|-------------|-------------|-------------------|
| 437 | DLG3     | 1.181702408 | 0.000506425 | 0.007178523 | 53.66370214 | 20.84782301 | Superficial | SOX2              |
| 438 | CXCL16   | 1.179795921 | 0.001883197 | 0.010234018 | 46.79771293 | 17.26782239 | Superficial | SOX2              |
| 439 | ATP11B   | 1.178194803 | 0.000635975 | 0.007274975 | 65.46139314 | 27.9797841  | Superficial | SOX2              |
| 440 | CACFD1   | 1.177820059 | 0.002315114 | 0.011381143 | 14.49874791 | 4.530803054 | Superficial | SOX2              |
| 441 | MEIS1    | 1.17701975  | 0.000992312 | 0.008042817 | 34.91496587 | 11.38435718 | Superficial | SOX2 + KLF5       |
| 442 | PBX2     | 1.176236683 | 0.000153669 | 0.007176147 | 30.22501723 | 8.896086592 | Superficial | SOX2              |
| 443 | NSUN2    | 1.17513159  | 0.004211401 | 0.016013117 | 18.99430485 | 5.369107729 | Superficial | SOX2              |
| 444 | FUBP3    | 1.172413423 | 9.30E-05    | 0.007176147 | 27.44845694 | 8.374105466 | Superficial | SOX2              |
| 445 | ATP8B1   | 1.17101992  | 0.000401828 | 0.012455402 | 39.21041059 | 15.67056765 | Basal       | SOX2 + KLF5       |
| 446 | PARP12   | 1.170055421 | 0.000635975 | 0.012925379 | 15.58978688 | 5.126299574 | Basal       | SOX2, SOX2 + KLF5 |
| 447 | GBA2     | 1.169999924 | 0.005105016 | 0.018023407 | 14.65856801 | 4.196633117 | Superficial | SOX2              |
| 448 | EPHA2    | 1.169962509 | 0.004211401 | 0.027185186 | 30.15484264 | 11.81886947 | Basal       | SOX2              |
| 449 | ZNF700   | 1.167879082 | 0.000196466 | 0.007176147 | 12.40076197 | 3.881582813 | Superficial | SOX2              |
| 450 | VPS54    | 1.167549799 | 0.004211401 | 0.016013117 | 17.16867299 | 4.649827082 | Superficial | SOX2              |
| 451 | LNBRD2   | 1.162448387 | 0.007423146 | 0.022959455 | 15.96772823 | 4.108028138 | Superficial | SOX2              |
| 452 | LRRCS9   | 1.161487916 | 0.000635975 | 0.007274975 | 42.52666787 | 14.53896465 | Superficial | SOX2              |
| 453 | FASTKD3  | 1.16065057  | 0.017811616 | 0.043066688 | 10.31174552 | 3.498409326 | Superficial | SOX2              |
| 454 | TATDN2   | 1.159747117 | 0.001883197 | 0.010234018 | 15.92499475 | 5.709440714 | Superficial | SOX2              |
| 455 | ZNF827   | 1.158149884 | 0.010644787 | 0.029507311 | 6.44223256  | 1.5745672   | Superficial | SOX2              |
| 456 | ENDOD1   | 1.157892731 | 0.001526458 | 0.009387421 | 35.09992903 | 11.74305729 | Superficial | SOX2              |
| 457 | SLC30A7  | 1.157881703 | 0.006166656 | 0.020290909 | 13.96798379 | 3.84775842  | Superficial | SOX2              |
| 458 | XBP1     | 1.155508829 | 0.003462059 | 0.014108599 | 57.3569173  | 22.63957265 | Superficial | SOX2              |
| 459 | STK26    | 1.15468951  | 0.000992312 | 0.008042817 | 31.7416801  | 8.213308058 | Superficial | SOX2              |
| 460 | BARX2    | 1.154142342 | 0.000317696 | 0.007176147 | 60.46456916 | 23.96402767 | Superficial | SOX2 + KLF5, SOX2 |
| 461 | APOBEC3C | 1.150402917 | 0.002315114 | 0.011381143 | 31.44693812 | 10.14252514 | Superficial | SOX2              |
| 462 | TRIB1    | 1.147939362 | 0.001526458 | 0.016792744 | 28.23414165 | 9.735724133 | Basal       | SOX2              |
| 463 | TP63     | 1.146853343 | 0.006166656 | 0.020290909 | 37.28071544 | 11.45048963 | Superficial | SOX2 + KLF5, SOX2 |
| 464 | SEMA3F   | 1.146811766 | 0.001883197 | 0.010234018 | 49.11393328 | 19.38989025 | Superficial | SOX2              |
| 465 | B4GALNT3 | 1.142848614 | 0.012681065 | 0.033478436 | 9.131762208 | 2.77867419  | Superficial | SOX2 + KLF5, SOX2 |
| 466 | ZCCHC2   | 1.141906951 | 0.000992312 | 0.008042817 | 16.46931387 | 4.382144031 | Superficial | SOX2              |
| 467 | RPS6KA3  | 1.139760282 | 0.001232925 | 0.008679903 | 37.84514834 | 11.68629436 | Superficial | SOX2 + KLF5, SOX2 |
| 468 | CD24     | 1.136471416 | 0.005105016 | 0.029792864 | 54.26310106 | 31.8283184  | Basal       | SOX2              |
| 469 | FAM98A   | 1.136144885 | 0.000250281 | 0.007176147 | 32.20407289 | 10.52410277 | Superficial | SOX2              |
| 470 | PWWP2A   | 1.135767663 | 0.000119764 | 0.007176147 | 23.25985825 | 7.532852069 | Superficial | SOX2              |
| 471 | ROBO2    | 1.132994815 | 0.007423146 | 0.022959455 | 10.96655989 | 2.722355349 | Superficial | SOX2 + KLF5       |
| 472 | LEPROTL1 | 1.130920154 | 0.002836074 | 0.012662188 | 37.83090472 | 16.4397208  | Superficial | SOX2              |
| 473 | USP14    | 1.129592738 | 0.001526458 | 0.009387421 | 41.12020623 | 13.37419131 | Superficial | SOX2              |
| 474 | LONRF1   | 1.128697791 | 0.003462059 | 0.014108599 | 16.98832356 | 3.932101419 | Superficial | SOX2              |
| 475 | PTPN11   | 1.127491694 | 0.000250281 | 0.007176147 | 45.38995352 | 15.60369219 | Superficial | SOX2              |
| 476 | SLC44A1  | 1.124630481 | 0.010644787 | 0.029507311 | 30.70360064 | 9.008386975 | Superficial | SOX2              |
| 477 | PAPSS1   | 1.123121593 | 0.002315114 | 0.011381143 | 42.22052091 | 14.95779843 | Superficial | SOX2              |
| 478 | AMMECR1  | 1.123103887 | 0.000506425 | 0.007178523 | 40.51025441 | 13.19490157 | Superficial | SOX2              |
| 479 | ATG4D    | 1.120578518 | 0.001883197 | 0.010234018 | 42.99015922 | 16.54741472 | Superficial | SOX2              |
| 480 | FOXQ1    | 1.120308157 | 0.000795824 | 0.010838271 | 49.85377761 | 21.73787519 | Suprabasal  | SOX2 + KLF5, SOX2 |
| 481 | DROSHA   | 1.120211159 | 0.002315114 | 0.011381143 | 32.9509232  | 3.912492171 | Superficial | SOX2              |
| 482 | DGCR2    | 1.119753322 | 0.000992312 | 0.008042817 | 36.05458181 | 11.88605041 | Superficial | SOX2              |
| 483 | NAT1     | 1.11949899  | 0.005105016 | 0.018023407 | 9.560135729 | 2.733991516 | Superficial | SOX2              |
| 484 | SNX7     | 1.118765388 | 0.000506425 | 0.007178523 | 24.582421   | 8.291960086 | Superficial | SOX2              |
| 485 | BCL2L2   | 1.118547819 | 0.002315114 | 0.011381143 | 33.03297089 | 10.55302431 | Superficial | SOX2              |
| 486 | OXNAD1   | 1.115216096 | 0.001232925 | 0.008679903 | 12.00572046 | 3.740562131 | Superficial | SOX2              |
| 487 | KANK1    | 1.115157148 | 0.003462059 | 0.014108599 | 45.85522332 | 16.13807382 | Superficial | SOX2              |
| 488 | FBXL18   | 1.11490085  | 0.008904627 | 0.025990329 | 18.8479122  | 5.558665317 | Superficial | SOX2              |
| 489 | TRIM4    | 1.114744712 | 0.000119764 | 0.007176147 | 21.61232033 | 6.44415365  | Superficial | SOX2              |
| 490 | CTCD     | 1.114599725 | 0.000992312 | 0.008042817 | 41.37982677 | 14.56407296 | Superficial | SOX2              |
| 491 | TMEM87A  | 1.112172671 | 9.30E-05    | 0.007176147 | 62.99294426 | 28.05497565 | Superficial | SOX2              |
| 492 | ACVR1    | 1.11208563  | 0.010644787 | 0.029507311 | 7.565015766 | 1.571333265 | Superficial | SOX2, SOX2 + KLF5 |
| 493 | PRPF8    | 1.110632241 | 0.001232925 | 0.008679903 | 43.91749476 | 15.59100667 | Superficial | SOX2              |
| 494 | SLCSA3   | 1.108546111 | 0.017811616 | 0.043066688 | 15.68467168 | 4.283838368 | Superficial | SOX2 + KLF5       |
| 495 | KNOP1    | 1.107463007 | 0.000635975 | 0.007274975 | 26.61624999 | 8.346682897 | Superficial | SOX2              |
| 496 | RASEF    | 1.106436035 | 0.002836074 | 0.012662188 | 33.89849056 | 10.29433174 | Superficial | SOX2              |
| 497 | ITPRIP   | 1.103478092 | 0.000119764 | 0.012455402 | 20.07023032 | 8.016875374 | Basal       | SOX2              |
| 498 | AGAP1    | 1.103049375 | 0.004211401 | 0.016013117 | 10.92596213 | 3.220511929 | Superficial | SOX2              |
| 499 | LYPD3    | 1.10226506  | 0.001526458 | 0.009387421 | 86.62604201 | 62.41967361 | Superficial | SOX2              |
| 500 | CEBPB    | 1.100953174 | 0.001883197 | 0.010234018 | 59.35662314 | 25.73980246 | Superficial | SOX2              |
| 501 | EPHB6    | 1.098421093 | 0.002315114 | 0.011381143 | 23.20066096 | 6.510947152 | Superficial | SOX2, SOX2 + KLF5 |
| 502 | SMAD5    | 1.096440138 | 0.006166656 | 0.020290909 | 35.81411772 | 11.0476338  | Superficial | SOX2              |
| 503 | GBP6     | 1.096333706 | 0.000506425 | 0.007178523 | 71.41018052 | 33.62966856 | Superficial | SOX2              |
| 504 | ASCC3    | 1.096048273 | 0.000795824 | 0.007615337 | 35.83077768 | 11.24188818 | Superficial | SOX2              |
| 505 | FAT2     | 1.095564156 | 0.007423146 | 0.022959455 | 32.04126368 | 11.20764163 | Superficial | SOX2              |
| 506 | ECT2     | 1.095234017 | 0.004211401 | 0.021879278 | 15.76508345 | 5.983007448 | Suprabasal  | SOX2              |
| 507 | ZBTB7C   | 1.095229116 | 0.006166656 | 0.020290909 | 37.09729954 | 12.38960308 | Superficial | SOX2              |
| 508 | ELK3     | 1.093367327 | 0.001883197 | 0.018415354 | 28.56296451 | 10.92497033 | Basal       | SOX2              |
| 509 | CRYZ     | 1.092201992 | 0.001883197 | 0.010234018 | 21.73380901 | 5.586580444 | Superficial | SOX2 + KLF5       |

|     |           |             |             |             |             |             |             |                   |
|-----|-----------|-------------|-------------|-------------|-------------|-------------|-------------|-------------------|
| 510 | PITPNC1   | 1.091116348 | 0.004211401 | 0.021879278 | 21.70312809 | 8.978402459 | Suprabasal  | SOX2              |
| 511 | MYO1E     | 1.090802208 | 0.004211401 | 0.027185186 | 27.99278453 | 10.70128805 | Basal       | SOX2              |
| 512 | LACTB2    | 1.090260768 | 0.001883197 | 0.010234018 | 20.41603957 | 5.557427606 | Superficial | SOX2              |
| 513 | ANXA8     | 1.088520498 | 0.006166656 | 0.020290909 | 37.31820819 | 12.19482701 | Superficial | SOX2              |
| 514 | PDIA3     | 1.087627963 | 0.000992312 | 0.008042817 | 71.74290452 | 35.69881232 | Superficial | SOX2              |
| 515 | EPAS1     | 1.087157497 | 0.007423146 | 0.030449933 | 48.81513341 | 24.82490815 | Suprabasal  | SOX2              |
| 516 | EPHB4     | 1.086430382 | 0.002836074 | 0.012662188 | 8.61356527  | 3.03940643  | Superficial | SOX2              |
| 517 | FAM83A    | 1.084655702 | 0.000992312 | 0.014320968 | 24.79974942 | 11.00318279 | Basal       | SOX2              |
| 518 | PAQR5     | 1.084374053 | 0.000401828 | 0.012455402 | 11.68677813 | 4.523001064 | Basal       | SOX2              |
| 519 | ACTR1B    | 1.083564297 | 0.002836074 | 0.012662188 | 31.0276409  | 10.4311608  | Superficial | SOX2              |
| 520 | ID1       | 1.083067962 | 0.008904627 | 0.025990329 | 67.99885112 | 36.38589517 | Superficial | SOX2              |
| 521 | ITPR2     | 1.082561726 | 0.002315114 | 0.011381143 | 36.76971811 | 11.19914389 | Superficial | SOX2, KLF5        |
| 522 | TGFBR1    | 1.082552543 | 0.017811616 | 0.043066688 | 21.28035822 | 5.768770277 | Superficial | SOX2 + KLF5       |
| 523 | ELOVL5    | 1.081800374 | 0.004211401 | 0.021879278 | 35.05474557 | 15.29151468 | Suprabasal  | SOX2              |
| 524 | HNRNPLL   | 1.081470571 | 0.000119764 | 0.007176147 | 19.51931021 | 5.953028379 | Superficial | SOX2              |
| 525 | CKMT1A    | 1.080797256 | 0.003462059 | 0.014108599 | 45.82714419 | 16.93959481 | Superficial | KLF5              |
| 526 | RTKN2     | 1.07996988  | 0.000401828 | 0.012455402 | 26.91170963 | 12.18065285 | Basal       | SOX2              |
| 527 | IRF6      | 1.076699665 | 0.000635975 | 0.007274975 | 66.79817342 | 31.74169161 | Superficial | SOX2              |
| 528 | GJB6      | 1.074050502 | 0.010644787 | 0.029507311 | 72.67287901 | 34.07712441 | Superficial | SOX2              |
| 529 | ZNF276    | 1.073832933 | 0.004211401 | 0.016013117 | 21.6021014  | 8.143746    | Superficial | SOX2              |
| 530 | GJB3      | 1.073481421 | 0.001883197 | 0.010234018 | 52.3986983  | 20.43895374 | Superficial | SOX2              |
| 531 | ZDHHC24   | 1.073405826 | 0.005105016 | 0.018023407 | 31.33471846 | 10.87359273 | Superficial | SOX2              |
| 532 | TXLNA     | 1.072929136 | 0.007423146 | 0.022959455 | 26.7723363  | 9.668176579 | Superficial | SOX2              |
| 533 | GNPDA2    | 1.072787336 | 0.003462059 | 0.014108599 | 8.553457117 | 2.209436035 | Superficial | SOX2              |
| 534 | ATP7A     | 1.07034877  | 0.001526458 | 0.009387421 | 18.37821598 | 5.769978836 | Superficial | SOX2              |
| 535 | CDKN2B    | 1.070294963 | 0.012681065 | 0.049425568 | 18.07850545 | 8.341417478 | Basal       | SOX2              |
| 536 | PCNX1     | 1.068627785 | 0.000795824 | 0.007615337 | 13.87619405 | 3.845484788 | Superficial | SOX2              |
| 537 | CDC60     | 1.068090748 | 0.004173922 | 0.016013117 | 5.07941827  | 1.732237896 | Superficial | SOX2              |
| 538 | EML4      | 1.066487042 | 0.001232925 | 0.008679903 | 29.48556773 | 8.712000848 | Superficial | SOX2              |
| 539 | ZNF219    | 1.066374966 | 0.002836074 | 0.012662188 | 38.58342754 | 13.5543592  | Superficial | SOX2              |
| 540 | RIF1      | 1.06443131  | 0.004211401 | 0.016013117 | 24.59154314 | 6.647944401 | Superficial | SOX2              |
| 541 | CDC42EP4  | 1.064259537 | 0.000506425 | 0.010489143 | 28.86197028 | 11.84880536 | Suprabasal  | SOX2              |
| 542 | HR        | 1.060194125 | 0.000635975 | 0.007274975 | 22.82513006 | 8.75455057  | Superficial | SOX2              |
| 543 | WWP1      | 1.05999757  | 7.20E-05    | 0.007176147 | 45.17265309 | 16.34281943 | Superficial | SOX2              |
| 544 | BOLA2     | 1.059889855 | 0.012659085 | 0.033478436 | 27.52597963 | 8.841058943 | Superficial | SOX2              |
| 545 | HES2      | 1.059617182 | 0.000196466 | 0.012455402 | 47.53905383 | 23.28976828 | Basal       | SOX2              |
| 546 | CDC42BPG  | 1.058014931 | 0.006166656 | 0.020290909 | 29.73744229 | 10.84726719 | Superficial | SOX2              |
| 547 | SQLE      | 1.057507387 | 0.010644787 | 0.029507311 | 53.21453026 | 22.40711233 | Superficial | SOX2              |
| 548 | PIGO      | 1.055646727 | 0.004211401 | 0.016013117 | 11.60956119 | 3.701016275 | Superficial | SOX2              |
| 549 | TADA3     | 1.055607235 | 0.000317696 | 0.007176147 | 40.42552055 | 15.3811476  | Superficial | SOX2              |
| 550 | ZNF1      | 1.05419277  | 0.000992312 | 0.014320968 | 16.99829037 | 5.815432506 | Basal       | SOX2              |
| 551 | SMG6      | 1.052156641 | 0.000506425 | 0.007178523 | 28.41227063 | 10.15996499 | Superficial | SOX2              |
| 552 | RAB11FIP2 | 1.051539922 | 0.004211401 | 0.016013117 | 12.72551013 | 2.863554896 | Superficial | SOX2 + KLF5, SOX2 |
| 553 | GALNT12   | 1.049379383 | 0.001232925 | 0.008679903 | 34.35833398 | 11.63233406 | Superficial | SOX2              |
| 554 | PDIK1L    | 1.048431055 | 0.006166656 | 0.020290909 | 11.5882273  | 3.088217267 | Superficial | SOX2              |
| 555 | FOX1      | 1.047638776 | 0.017811616 | 0.043066688 | 15.52853274 | 7.61471716  | Superficial | SOX2              |
| 556 | COG6      | 1.04676455  | 0.001526458 | 0.009387421 | 18.12524566 | 6.012127181 | Superficial | SOX2              |
| 557 | CLDN4     | 1.046614095 | 0.003462059 | 0.024854712 | 53.00129205 | 29.07079485 | Basal       | SOX2, SOX2 + KLF5 |
| 558 | TBC1D5    | 1.045495453 | 0.000506425 | 0.007178523 | 21.15279137 | 6.383257151 | Superficial | SOX2              |
| 559 | GBP2      | 1.043537437 | 0.006166656 | 0.020290909 | 43.075913   | 16.48742557 | Superficial | SOX2, SOX2 + KLF5 |
| 560 | CHCHD4    | 1.041517737 | 0.005105016 | 0.018023407 | 13.20831071 | 4.101917452 | Superficial | SOX2              |
| 561 | PIAS3     | 1.039484217 | 0.005105016 | 0.018023407 | 21.87521411 | 7.021571866 | Superficial | SOX2              |
| 562 | PDZRN3    | 1.038845423 | 0.005105016 | 0.018023407 | 9.730521189 | 3.580156724 | Superficial | SOX2 + KLF5, SOX2 |
| 563 | EPB41L5   | 1.038189591 | 0.001883197 | 0.010234018 | 32.11329554 | 10.05839763 | Superficial | SOX2              |
| 564 | TNKS      | 1.036998801 | 0.001883197 | 0.010234018 | 19.29376441 | 5.687144619 | Superficial | SOX2              |
| 565 | GJB5      | 1.036529192 | 0.012681065 | 0.033478436 | 50.72292565 | 17.65083088 | Superficial | SOX2 + KLF5       |
| 566 | MANF      | 1.032784742 | 0.003462059 | 0.014108599 | 68.1159678  | 32.72827979 | Superficial | SOX2              |
| 567 | HMGXB3    | 1.031603042 | 0.005105016 | 0.018023407 | 13.16907487 | 4.247519548 | Superficial | SOX2              |
| 568 | DLG1      | 1.030612623 | 0.000250281 | 0.007176147 | 59.02506663 | 26.05889543 | Superficial | SOX2              |
| 569 | ATAD2B    | 1.029425719 | 0.001526458 | 0.009387421 | 21.42384634 | 5.846551603 | Superficial | SOX2              |
| 570 | USP12     | 1.028326657 | 0.000506425 | 0.010489143 | 24.13745095 | 9.410233246 | Suprabasal  | SOX2, SOX2 + KLF5 |
| 571 | USP42     | 1.027599754 | 0.001526458 | 0.009387421 | 11.22238109 | 3.728432416 | Superficial | SOX2              |
| 572 | APEX2     | 1.026096018 | 0.000992312 | 0.008042817 | 25.71451459 | 9.11992571  | Superficial | SOX2              |
| 573 | RAP2C     | 1.025837921 | 0.000401828 | 0.007176147 | 31.69093352 | 10.06563417 | Superficial | SOX2              |
| 574 | CGN       | 1.025734272 | 0.001526458 | 0.009387421 | 44.55844951 | 16.51730629 | Superficial | SOX2              |
| 575 | HCFC2     | 1.025545192 | 0.001526458 | 0.009387421 | 17.90303463 | 5.748783799 | Superficial | SOX2              |
| 576 | CLIP1     | 1.025361477 | 0.000250281 | 0.012455402 | 51.95265842 | 26.04386187 | Basal       | SOX2              |
| 577 | SRFBP1    | 1.025231274 | 0.006166656 | 0.020290909 | 20.35835208 | 6.194081963 | Superficial | SOX2              |
| 578 | SFN       | 1.024113903 | 0.003462059 | 0.014108599 | 86.40801124 | 59.03093976 | Superficial | SOX2              |
| 579 | CHMP7     | 1.023040049 | 0.004211401 | 0.016013117 | 14.31554793 | 5.15490207  | Superficial | SOX2              |
| 580 | SEMA4C    | 1.020675853 | 0.000401828 | 0.012455402 | 13.60453169 | 4.878061834 | Basal       | SOX2              |
| 581 | IMMT      | 1.020403361 | 0.007423146 | 0.022959455 | 41.15591597 | 13.86769913 | Superficial | SOX2              |
| 582 | MED27     | 1.016751381 | 0.001883197 | 0.010234018 | 20.7375588  | 6.37266373  | Superficial | SOX2              |

|     |          |             |             |             |             |             |             |                   |
|-----|----------|-------------|-------------|-------------|-------------|-------------|-------------|-------------------|
| 583 | STK39    | 1.016669337 | 0.001883197 | 0.018415354 | 21.59722621 | 8.154177809 | Basal       | SOX2              |
| 584 | VCL      | 1.016433297 | 0.000250281 | 0.012455402 | 50.18358999 | 23.40486234 | Basal       | SOX2 + KLF5, SOX2 |
| 585 | GLG1     | 1.014764777 | 0.000506425 | 0.007178523 | 38.66809769 | 13.84952322 | Superficial | SOX2              |
| 586 | DGKH     | 1.014239019 | 0.012681065 | 0.033478436 | 16.90556525 | 3.927563317 | Superficial | SOX2              |
| 587 | SPIRE2   | 1.012985199 | 0.010644787 | 0.038255467 | 4.88784887  | 2.320639171 | Suprabasal  | KLF5, SOX2        |
| 588 | PDI4A    | 1.011720547 | 0.006166656 | 0.020290909 | 44.57312376 | 18.01306715 | Superficial | SOX2              |
| 589 | IPO8     | 1.011278306 | 0.002315114 | 0.011381143 | 19.10865866 | 6.340994881 | Superficial | SOX2              |
| 590 | WRNIP1   | 1.01058191  | 0.000401828 | 0.007176147 | 31.36699098 | 10.96769113 | Superficial | SOX2              |
| 591 | MRPL35   | 1.009994966 | 0.001526458 | 0.009387421 | 44.0994244  | 15.84466649 | Superficial | SOX2              |
| 592 | CYP2J2   | 1.009979358 | 0.002836074 | 0.012662188 | 39.69669461 | 14.93332307 | Superficial | SOX2              |
| 593 | SSBP2    | 1.008614228 | 0.003462059 | 0.014108599 | 34.56102056 | 10.69519446 | Superficial | SOX2              |
| 594 | EMP2     | 1.008286992 | 0.000401828 | 0.007176147 | 85.15076119 | 65.60610945 | Superficial | SOX2              |
| 595 | ELOVL1   | 1.007657584 | 0.002836074 | 0.012662188 | 67.73851337 | 30.2888522  | Superficial | SOX2              |
| 596 | WIZ      | 1.003348574 | 0.004211401 | 0.016013117 | 14.06167781 | 4.932187334 | Superficial | SOX2              |
| 597 | FLYWCH1  | 1.003246571 | 0.015054848 | 0.048140298 | 13.30169272 | 6.134460931 | Suprabasal  | SOX2              |
| 598 | PANK3    | 1.002008835 | 0.005105016 | 0.018023407 | 42.2483754  | 14.84793779 | Superficial | SOX2              |
| 599 | ERBB2    | 1.000797318 | 0.003462059 | 0.014108599 | 64.90384468 | 29.36807898 | Superficial | SOX2              |
| 600 | GJB2     | 1.000707221 | 0.015054848 | 0.038009884 | 77.54819408 | 42.9288687  | Superficial | SOX2              |
| 601 | RNFBF2   | 1.000004846 | 0.001526458 | 0.009387421 | 46.98351695 | 20.86267964 | Superficial | SOX2              |
| 602 | NAA35    | 0.999499739 | 0.000250281 | 0.007176147 | 24.88781225 | 7.308081533 | Superficial | SOX2              |
| 603 | OAS3     | 0.999411652 | 0.017811616 | 0.043066688 | 33.91694122 | 9.730762134 | Superficial | SOX2              |
| 604 | SLC4A2   | 0.998539121 | 0.000506425 | 0.007178523 | 17.02633306 | 5.480113383 | Superficial | SOX2              |
| 605 | RNF220   | 0.998062117 | 0.001526458 | 0.009387421 | 21.53668386 | 7.445293659 | Superficial | SOX2              |
| 606 | CYP3A5   | 0.997896563 | 0.008904627 | 0.025990329 | 33.40356    | 12.07692171 | Superficial | SOX2              |
| 607 | PREP     | 0.997620789 | 0.000506425 | 0.007178523 | 18.8332859  | 5.754453574 | Superficial | SOX2              |
| 608 | ANKRD50  | 0.997212216 | 0.006166656 | 0.020290909 | 10.84753741 | 3.542220569 | Superficial | SOX2              |
| 609 | SMARCD1  | 0.996268912 | 0.007423146 | 0.022959455 | 14.35571326 | 4.114308749 | Superficial | SOX2              |
| 610 | CLASP2   | 0.995469306 | 0.021001058 | 0.04834985  | 17.84008933 | 5.495820276 | Superficial | SOX2              |
| 611 | CREB3    | 0.993048401 | 0.021001058 | 0.04834985  | 16.08875673 | 6.82847754  | Superficial | SOX2              |
| 612 | GSN      | 0.992984158 | 0.000250281 | 0.012455402 | 80.3245791  | 55.83838799 | Basal       | SOX2, KLF5        |
| 613 | PLCH2    | 0.990452369 | 0.000317696 | 0.010489143 | 19.86664017 | 9.082930267 | Suprabasal  | SOX2              |
| 614 | KDM1B    | 0.988968052 | 0.001883197 | 0.010234018 | 17.13891304 | 5.515185538 | Superficial | SOX2              |
| 615 | MAPKAPK3 | 0.985942266 | 0.000250281 | 0.007176147 | 61.16829182 | 27.56571044 | Superficial | SOX2              |
| 616 | N4BP3    | 0.982741775 | 0.000317696 | 0.012455402 | 13.99363767 | 5.703652307 | Basal       | SOX2              |
| 617 | RAB3GAP2 | 0.981611807 | 0.000795824 | 0.007615337 | 30.71255762 | 10.52537581 | Superficial | SOX2              |
| 618 | CDC40    | 0.979458465 | 0.001526458 | 0.009387421 | 42.10328835 | 14.46730754 | Superficial | SOX2              |
| 619 | POBEC3B  | 0.978993045 | 0.006166656 | 0.032981404 | 10.8000218  | 4.018199162 | Basal       | SOX2              |
| 620 | ETV4     | 0.978127481 | 0.021001058 | 0.04834985  | 18.32034763 | 5.168240674 | Superficial | SOX2              |
| 621 | RBM27    | 0.976527696 | 0.000317696 | 0.007176147 | 41.41526646 | 14.85977794 | Superficial | SOX2              |
| 622 | VPS13A   | 0.975658933 | 0.001883197 | 0.010234018 | 29.64566246 | 9.650092596 | Superficial | SOX2              |
| 623 | TRIM29   | 0.975559011 | 0.003462059 | 0.014108599 | 83.4744379  | 60.80594581 | Superficial | SOX2              |
| 624 | CLNS1A   | 0.973230763 | 0.001526458 | 0.009387421 | 52.95854222 | 20.20355588 | Superficial | SOX2              |
| 625 | CLDN7    | 0.973223705 | 0.000119764 | 0.012455402 | 72.00569277 | 42.20990403 | Basal       | SOX2              |
| 626 | NFIL3    | 0.973007118 | 0.000153669 | 0.010489143 | 31.80256845 | 14.76095525 | Suprabasal  | SOX2              |
| 627 | OVOL1    | 0.972186252 | 0.004211401 | 0.027185186 | 36.62987761 | 17.67239326 | Basal       | SOX2              |
| 628 | ARL6IP6  | 0.971918062 | 0.001883197 | 0.010234018 | 27.33317617 | 8.29542678  | Superficial | SOX2              |
| 629 | VLDLR    | 0.971565055 | 0.005105016 | 0.018023407 | 34.62065303 | 10.68412266 | Superficial | SOX2              |
| 630 | EFN2B    | 0.971028932 | 0.002315114 | 0.011381143 | 34.08986984 | 10.68114608 | Superficial | SOX2 + KLF5, SOX2 |
| 631 | C5orf22  | 0.964610162 | 0.002315114 | 0.011381143 | 14.12842584 | 4.040622089 | Superficial | SOX2              |
| 632 | SLC35F6  | 0.963323494 | 0.004211401 | 0.016013117 | 36.32587527 | 31.52598771 | Superficial | SOX2              |
| 633 | SBF1     | 0.962933302 | 0.000401828 | 0.012455402 | 18.97321274 | 7.722577967 | Basal       | SOX2              |
| 634 | HEATR3   | 0.962903361 | 0.010644787 | 0.029507311 | 10.24391514 | 3.623009779 | Superficial | SOX2              |
| 635 | GRHL2    | 0.962221635 | 0.002836074 | 0.012662188 | 26.28896804 | 9.49884602  | Superficial | SOX2              |
| 636 | CCDC88C  | 0.960891309 | 0.008904627 | 0.025990329 | 14.82332483 | 4.120973742 | Superficial | SOX2 + KLF5       |
| 637 | OCLN     | 0.95992656  | 0.000250281 | 0.012455402 | 16.5872587  | 6.29292647  | Basal       | SOX2              |
| 638 | GK       | 0.959674774 | 0.012681065 | 0.033478436 | 22.60421961 | 7.571280152 | Superficial | SOX2              |
| 639 | CASP1    | 0.957510724 | 0.000795824 | 0.007615337 | 26.91963947 | 8.607716575 | Superficial | KLF5              |
| 640 | PATJ     | 0.954789173 | 0.000119764 | 0.007176147 | 62.19275094 | 28.5356374  | Superficial | SOX2              |
| 641 | RBM12B   | 0.951788942 | 0.007423146 | 0.022959455 | 9.07536362  | 2.496305965 | Superficial | SOX2              |
| 642 | MBNL3    | 0.951778334 | 0.005105016 | 0.018023407 | 20.86518059 | 7.084354369 | Superficial | SOX2 + KLF5, SOX2 |
| 643 | GPHN     | 0.950352459 | 0.005105016 | 0.018023407 | 10.12383445 | 2.84515677  | Superficial | SOX2 + KLF5       |
| 644 | CLASP1   | 0.948346748 | 0.003462059 | 0.019729589 | 23.72656834 | 10.93478622 | Suprabasal  | SOX2              |
| 645 | TJP1     | 0.947613883 | 0.000196466 | 0.012455402 | 59.43942815 | 31.52598771 | Basal       | SOX2              |
| 646 | NTF4     | 0.947273158 | 0.012681065 | 0.042921737 | 5.706436766 | 2.210792774 | Suprabasal  | SOX2              |
| 647 | ITPKC    | 0.947170762 | 0.002836074 | 0.022562695 | 44.35874301 | 23.17878921 | Basal       | SOX2              |
| 648 | SNRNP200 | 0.945149806 | 0.000506425 | 0.007178523 | 38.43103539 | 14.67962995 | Superficial | SOX2              |
| 649 | LIMK2    | 0.943596112 | 0.002836074 | 0.012662188 | 38.02056013 | 14.07641227 | Superficial | SOX2              |
| 650 | IFI44    | 0.942373886 | 0.012681065 | 0.042921737 | 16.09657028 | 5.918626253 | Suprabasal  | SOX2              |
| 651 | IFNGR1   | 0.941175231 | 0.004211401 | 0.016013117 | 33.31017628 | 11.24701455 | Superficial | SOX2              |
| 652 | TXNDC5   | 0.940628861 | 0.000795824 | 0.0136425   | 35.12375823 | 13.57082836 | Basal       | SOX2              |
| 653 | PKP1     | 0.940526247 | 0.005105016 | 0.018023407 | 73.57168146 | 41.33040784 | Superficial | SOX2 + KLF5, SOX2 |
| 654 | TM7SF2   | 0.940277008 | 0.003462059 | 0.014108599 | 74.58981573 | 44.97928738 | Superficial | SOX2              |
| 655 | ATXN1    | 0.939973269 | 0.008904627 | 0.025990329 | 30.66077976 | 9.153560369 | Superficial | SOX2 + KLF5, SOX2 |



|     |          |             |             |             |             |             |             |                         |
|-----|----------|-------------|-------------|-------------|-------------|-------------|-------------|-------------------------|
| 656 | HYAL2    | 0.939193889 | 0.008904627 | 0.025990329 | 25.45374355 | 9.165485301 | Superficial | SOX2                    |
| 657 | PIR      | 0.938528782 | 0.010644787 | 0.029507311 | 42.51794111 | 15.60827055 | Superficial | SOX2                    |
| 658 | SRCAP    | 0.937080417 | 0.004211401 | 0.021879278 | 23.12213982 | 10.22666155 | Suprabasal  | SOX2                    |
| 659 | KDM5A    | 0.936624009 | 0.000401828 | 0.007176147 | 52.87431596 | 22.545332   | Superficial | SOX2                    |
| 660 | HIPK2    | 0.936277725 | 0.000795824 | 0.007615337 | 44.33080382 | 16.53588677 | Superficial | SOX2                    |
| 661 | XPR1     | 0.935980881 | 0.008904627 | 0.034252903 | 13.83697012 | 5.461275977 | Suprabasal  | SOX2                    |
| 662 | C11orf80 | 0.934813283 | 0.001883197 | 0.010234018 | 19.61554888 | 7.757036142 | Superficial | SOX2                    |
| 663 | TLCD1    | 0.934508989 | 0.008904627 | 0.025990329 | 26.94830138 | 9.425029458 | Superficial | SOX2                    |
| 664 | IL15     | 0.931288218 | 0.002836074 | 0.0176927   | 10.39551987 | 3.705311357 | Suprabasal  | SOX2, SOX2 + KLF5       |
| 665 | IGF1R    | 0.930404525 | 0.003462059 | 0.019729589 | 35.5263818  | 16.47930112 | Suprabasal  | SOX2                    |
| 666 | VPS16    | 0.930332913 | 0.003462059 | 0.014108599 | 23.27652963 | 9.006523619 | Superficial | SOX2                    |
| 667 | PARN     | 0.930213959 | 0.015054848 | 0.038009884 | 13.26146873 | 4.826815714 | Superficial | SOX2                    |
| 668 | IFIH1    | 0.930212135 | 0.007423146 | 0.030449933 | 37.56081844 | 17.67361083 | Suprabasal  | SOX2 + KLF5             |
| 669 | MLKL     | 0.929694873 | 0.007423146 | 0.022959455 | 13.79556589 | 5.302842768 | Superficial | SOX2                    |
| 670 | BCL6     | 0.929155584 | 0.004211401 | 0.021879278 | 25.26670431 | 10.89606288 | Suprabasal  | SOX2                    |
| 671 | SULF2    | 0.926816247 | 0.004211401 | 0.021879278 | 56.00061141 | 30.06269751 | Suprabasal  | SOX2                    |
| 672 | SPRY2    | 0.92469581  | 0.003462059 | 0.019729589 | 9.968966492 | 3.716915077 | Suprabasal  | SOX2                    |
| 673 | RPU5D3   | 0.921826912 | 0.004211401 | 0.016013117 | 36.06544029 | 14.38430226 | Superficial | SOX2                    |
| 674 | TNKS1BP1 | 0.921810736 | 0.000401828 | 0.007176147 | 19.92456963 | 17.19199187 | Superficial | SOX2                    |
| 675 | METTL16  | 0.921425744 | 0.015054848 | 0.038009884 | 10.71836209 | 3.663641463 | Superficial | SOX2                    |
| 676 | THUMP1   | 0.921027525 | 0.000795824 | 0.007615337 | 35.43257965 | 11.99410572 | Superficial | SOX2                    |
| 677 | MORC4    | 0.919114825 | 0.021001058 | 0.04834985  | 19.58222702 | 6.690165479 | Superficial | SOX2                    |
| 678 | SMPD3    | 0.91883153  | 0.012681065 | 0.033478436 | 9.692248683 | 3.781776836 | Superficial | SOX2, KLF5, SOX2 + KLF5 |
| 679 | CTSS     | 0.918754346 | 0.003462059 | 0.019729589 | 58.74895434 | 32.65659344 | Suprabasal  | SOX2                    |
| 680 | DDX23    | 0.918262459 | 0.000635975 | 0.007274975 | 33.28708232 | 12.49172321 | Superficial | SOX2                    |
| 681 | DNAJC11  | 0.918087484 | 0.005105016 | 0.018023407 | 17.65883872 | 6.07592926  | Superficial | SOX2                    |
| 682 | CHD1     | 0.916971655 | 0.002315114 | 0.011381143 | 29.52238981 | 10.04115794 | Superficial | SOX2                    |
| 683 | NUP133   | 0.914397334 | 0.015054848 | 0.038009884 | 13.23558916 | 4.066194821 | Superficial | SOX2                    |
| 684 | ZNF532   | 0.913554972 | 0.008904627 | 0.034252903 | 14.08271725 | 5.827776916 | Suprabasal  | SOX2                    |
| 685 | ANK3     | 0.913274645 | 0.012681065 | 0.033478436 | 32.92849736 | 10.82374859 | Superficial | SOX2 + KLF5             |
| 686 | PEX26    | 0.911924325 | 0.021001058 | 0.04834985  | 17.34632142 | 5.907570971 | Superficial | SOX2                    |
| 687 | RTCB     | 0.910029323 | 0.000506425 | 0.007178523 | 64.11821594 | 31.35594231 | Superficial | SOX2                    |
| 688 | AFG3L2   | 0.909662689 | 0.001526458 | 0.009387421 | 45.0308695  | 18.25711922 | Superficial | SOX2                    |
| 689 | UBE3C    | 0.908984058 | 0.002315114 | 0.011381143 | 28.28995982 | 9.861957868 | Superficial | SOX2                    |
| 690 | SCEL     | 0.908585979 | 0.004211401 | 0.027185186 | 35.21521921 | 18.03409494 | Basal       | SOX2                    |
| 691 | CCAR1    | 0.908014534 | 0.008904627 | 0.025990329 | 41.8177982  | 14.38612398 | Superficial | SOX2                    |
| 692 | TNFSF10  | 0.906889478 | 0.001526458 | 0.016792744 | 90.0032318  | 67.96705726 | Basal       | SOX2, KLF5              |
| 693 | SLC45A4  | 0.906108969 | 0.008904627 | 0.040392504 | 8.764812014 | 2.929838771 | Basal       | SOX2                    |
| 694 | MAGED2   | 0.905063097 | 0.000635975 | 0.007274975 | 36.3342794  | 13.70758675 | Superficial | SOX2                    |
| 695 | BAC      | 0.904694009 | 0.000795824 | 0.0136425   | 21.22696209 | 8.213040475 | Basal       | SOX2                    |
| 696 | ITPR3    | 0.90283063  | 0.001526458 | 0.016792744 | 27.31887442 | 11.01249269 | Basal       | SOX2                    |
| 697 | ARHGEF5  | 0.902031503 | 0.004211401 | 0.021879278 | 49.08157174 | 27.73966165 | Suprabasal  | SOX2                    |
| 698 | TBC1D10A | 0.901080387 | 0.004211401 | 0.016013117 | 31.31177269 | 11.81774667 | Superficial | SOX2                    |
| 699 | ANKIB1   | 0.900545456 | 0.000153669 | 0.007176147 | 37.04964394 | 13.30203144 | Superficial | SOX2                    |
| 700 | SLC4A7   | 0.899999926 | 0.017811616 | 0.043066688 | 6.29061434  | 1.861275296 | Superficial | SOX2 + KLF5             |
| 701 | FXYD3    | 0.899656014 | 0.002315114 | 0.011381143 | 87.03589411 | 66.84367355 | Superficial | SOX2                    |
| 702 | CDKAL1   | 0.89933994  | 0.000506425 | 0.007178523 | 11.61467749 | 3.791144178 | Superficial | SOX2                    |
| 703 | FURIN    | 0.899232364 | 0.000153669 | 0.012455402 | 17.94979085 | 6.915633525 | Basal       | SOX2                    |
| 704 | CAMSAP1  | 0.899201892 | 0.000119764 | 0.012455402 | 33.88678212 | 15.33563619 | Basal       | SOX2                    |
| 705 | PHC2     | 0.896625623 | 0.001883197 | 0.010234018 | 17.54207804 | 6.22869448  | Superficial | SOX2                    |
| 706 | LRRRC42  | 0.895968102 | 0.001232925 | 0.008679903 | 32.72943189 | 11.61962184 | Superficial | SOX2                    |
| 707 | SLC39A6  | 0.895816619 | 0.006166656 | 0.020290909 | 16.16572683 | 4.572418678 | Superficial | SOX2                    |
| 708 | ST14     | 0.89536654  | 7.20E-05    | 0.012455402 | 50.40009109 | 25.34790976 | Basal       | SOX2, SOX2 + KLF5       |
| 709 | PLEKHG3  | 0.895015137 | 0.015054848 | 0.038009884 | 13.95511449 | 4.823953346 | Superficial | SOX2                    |
| 710 | TIAM1    | 0.894450063 | 0.000992312 | 0.008042817 | 54.68463967 | 24.04975501 | Superficial | SOX2                    |
| 711 | KIAA1217 | 0.893786401 | 0.000992312 | 0.008042817 | 53.56579201 | 21.83646765 | Superficial | SOX2                    |
| 712 | SPECC1L  | 0.893320652 | 0.001232925 | 0.015721789 | 24.77042245 | 9.815567676 | Basal       | SOX2                    |
| 713 | EPN2     | 0.893135704 | 0.000795824 | 0.007615337 | 63.41211342 | 30.86327485 | Superficial | SOX2 + KLF5             |
| 714 | BMPR2    | 0.892138295 | 0.001883197 | 0.010234018 | 38.46729266 | 14.761013   | Superficial | SOX2, SOX2 + KLF5       |
| 715 | CDCP1    | 0.890652929 | 0.000992312 | 0.008042817 | 66.76017312 | 32.69936178 | Superficial | SOX2                    |
| 716 | TNRC18   | 0.889205782 | 0.017811616 | 0.043066688 | 24.24592989 | 8.527045348 | Superficial | SOX2 + KLF5, SOX2       |
| 717 | TOMM70   | 0.887267944 | 0.003462059 | 0.014108599 | 30.88206662 | 10.68652037 | Superficial | SOX2                    |
| 718 | KCNK7    | 0.886984141 | 0.012681065 | 0.033478436 | 31.28106222 | 10.82219727 | Superficial | SOX2                    |
| 719 | EPHB3    | 0.885669184 | 0.001526458 | 0.016792744 | 17.94114574 | 7.389341179 | Basal       | SOX2                    |
| 720 | BMPR1A   | 0.882293181 | 0.003462059 | 0.014108599 | 12.01608827 | 3.634607464 | Superficial | SOX2                    |
| 721 | TRAF3IP1 | 0.882212095 | 0.005105016 | 0.018023407 | 14.53927799 | 4.312759643 | Superficial | SOX2                    |
| 722 | NOL10    | 0.882088665 | 0.015054848 | 0.038009884 | 17.02148532 | 6.188813952 | Superficial | SOX2 + KLF5, SOX2       |
| 723 | RNF19B   | 0.881491342 | 0.000506425 | 0.012898798 | 25.32034955 | 10.32639443 | Basal       | SOX2 + KLF5, SOX2       |
| 724 | UGCG     | 0.880956022 | 0.000317696 | 0.012455402 | 41.6884798  | 18.93866914 | Basal       | SOX2, SOX2 + KLF5       |
| 725 | ABLIM2   | 0.87843226  | 0.001232925 | 0.012246384 | 21.47830619 | 10.05916517 | Suprabasal  | SOX2                    |
| 726 | CEP170B  | 0.878140221 | 0.000401828 | 0.012455402 | 19.88590991 | 7.313422792 | Basal       | SOX2                    |
| 727 | MORC2    | 0.87731019  | 0.001526458 | 0.009387421 | 11.36270155 | 3.478454545 | Superficial | SOX2                    |
| 728 | FTSJ3    | 0.876905147 | 0.000635975 | 0.007274975 | 19.33425643 | 6.629415989 | Superficial | SOX2                    |

|     |          |             |             |             |              |             |             |                   |
|-----|----------|-------------|-------------|-------------|--------------|-------------|-------------|-------------------|
| 729 | NOTCH1   | 0.876227202 | 0.003462059 | 0.024854712 | 28.32956634  | 13.11437681 | Basal       | SOX2              |
| 730 | ZDHHCL16 | 0.875936954 | 0.008904627 | 0.025990329 | 18.0535891   | 6.514104604 | Superficial | SOX2              |
| 731 | IGSF3    | 0.875568181 | 0.004211401 | 0.016013117 | 20.64854284  | 7.060117599 | Superficial | SOX2              |
| 732 | METT114  | 0.875376042 | 0.002836074 | 0.012662188 | 20.15456999  | 6.39679254  | Superficial | SOX2              |
| 733 | HDFG     | 0.875145778 | 0.000506425 | 0.007178523 | 63.33322983  | 30.12978082 | Superficial | SOX2              |
| 734 | BTG1     | 0.874641303 | 7.20E-05    | 0.007176147 | 76.33575407  | 46.9884185  | Superficial | SOX2, SOX2 + KLF5 |
| 735 | CHRAC1   | 0.874329147 | 0.001526458 | 0.009387421 | 32.58122904  | 11.03633825 | Superficial | SOX2              |
| 736 | PPP1R26  | 0.874196498 | 0.000795824 | 0.010838271 | 9.010442668  | 3.864186864 | Suprabasal  | SOX2              |
| 737 | CAMSAP3  | 0.873243075 | 0.001232925 | 0.015721789 | 12.6460333   | 5.306066422 | Basal       | SOX2              |
| 738 | TP53RK   | 0.873165537 | 0.001883197 | 0.010234018 | 34.69402438  | 13.34150254 | Superficial | SOX2              |
| 739 | LETM1    | 0.872109216 | 0.000635975 | 0.007274975 | 48.00505357  | 21.60553929 | Superficial | SOX2              |
| 740 | RBM19    | 0.870734356 | 0.008904627 | 0.025990329 | 9.455645202  | 3.177116214 | Superficial | SOX2              |
| 741 | NOP14    | 0.870040844 | 0.012681065 | 0.033478436 | 17.67069829  | 5.687473923 | Superficial | SOX2              |
| 742 | SLC25A46 | 0.869726759 | 0.010644787 | 0.029507311 | 27.18592165  | 9.768766573 | Superficial | SOX2              |
| 743 | NLRX1    | 0.869680205 | 0.006166656 | 0.020290909 | 44.2626525   | 19.65292128 | Superficial | SOX2              |
| 744 | ADCK2    | 0.869583124 | 0.007423146 | 0.022959455 | 21.60813141  | 8.531418818 | Superficial | SOX2              |
| 745 | RAB3D    | 0.86952271  | 0.015054848 | 0.038009884 | 36.43417123  | 14.40115223 | Superficial | SOX2              |
| 746 | HNRNPAB  | 0.868905205 | 0.002836074 | 0.012662188 | 55.3602438   | 22.22158232 | Superficial | SOX2              |
| 747 | C5NK1G3  | 0.868108155 | 0.000635975 | 0.007274975 | 25.97849208  | 8.715818884 | Superficial | SOX2              |
| 748 | PLXNA2   | 0.867985641 | 0.006166656 | 0.020290909 | 29.09724384  | 8.662493629 | Superficial | SOX2              |
| 749 | POLR3A   | 0.867854544 | 0.017811616 | 0.043066688 | 9.674285364  | 2.890829878 | Superficial | SOX2              |
| 750 | PLOD2    | 0.867405121 | 0.003462059 | 0.014108599 | 24.23100976  | 7.329784954 | Superficial | SOX2              |
| 751 | CLOCK    | 0.867335537 | 0.015054848 | 0.038009884 | 35.97663274  | 12.96369281 | Superficial | SOX2              |
| 752 | VRK2     | 0.866624796 | 0.002836074 | 0.012662188 | 27.63407787  | 9.880195058 | Superficial | SOX2              |
| 753 | MTA2     | 0.866164613 | 0.017811616 | 0.043066688 | 24.48027662  | 10.40104993 | Superficial | SOX2              |
| 754 | IRF1     | 0.864606905 | 7.20E-05    | 0.012455402 | 66.36951881  | 38.12897296 | Basal       | SOX2              |
| 755 | SPSB2    | 0.863671948 | 0.021001058 | 0.04834985  | 12.26063796  | 4.552374875 | Superficial | SOX2              |
| 756 | UNC45A   | 0.863347383 | 0.008904627 | 0.025990329 | 30.21492431  | 11.95655965 | Superficial | SOX2              |
| 757 | FAM110C  | 0.863318044 | 0.000401828 | 0.010489143 | 49.1183436   | 27.19016149 | Suprabasal  | SOX2, SOX2 + KLF5 |
| 758 | RNF214   | 0.860639186 | 0.000992312 | 0.008042817 | 20.37905803  | 7.210504233 | Superficial | SOX2              |
| 759 | NLN      | 0.860495589 | 0.002836074 | 0.012662188 | 10.91799313  | 3.618501469 | Superficial | SOX2              |
| 760 | NSMAF    | 0.858277222 | 0.012681065 | 0.033478436 | 11.88905994  | 4.845257228 | Superficial | SOX2              |
| 761 | TPST1    | 0.858189681 | 0.000992312 | 0.01142308  | 22.00115385  | 9.487918828 | Suprabasal  | SOX2              |
| 762 | MCMBP    | 0.856648759 | 0.000401828 | 0.007176147 | 28.42016649  | 10.86479165 | Superficial | SOX2              |
| 763 | OSBP     | 0.855633877 | 0.006166656 | 0.020290909 | 40.09049547  | 16.42969957 | Superficial | SOX2              |
| 764 | FAS      | 0.855309759 | 0.000196466 | 0.010489143 | 28.48938444  | 12.96714597 | Suprabasal  | SOX2              |
| 765 | LUZP1    | 0.855211261 | 0.000196466 | 0.007176147 | 37.10983106  | 13.77168569 | Superficial | SOX2              |
| 766 | SLC10A3  | 0.855190282 | 0.008904627 | 0.025990329 | 24.99035341  | 9.877241285 | Superficial | SOX2              |
| 767 | PDCD4    | 0.852743281 | 0.005105016 | 0.018023407 | 76.60735903  | 42.69342999 | Superficial | SOX2              |
| 768 | PHF14    | 0.852521794 | 0.002836074 | 0.012662188 | 29.36397933  | 9.593443001 | Superficial | SOX2              |
| 769 | HADAC1   | 0.851318097 | 0.000992312 | 0.008042817 | 61.95501145  | 30.23757095 | Superficial | SOX2              |
| 770 | FCHSD2   | 0.850963554 | 0.002836074 | 0.0176927   | 8.91420517   | 4.048490828 | Suprabasal  | SOX2 + KLF5       |
| 771 | ERCC3    | 0.849248528 | 0.008904627 | 0.025990329 | 12.5092704   | 4.311489353 | Superficial | SOX2              |
| 772 | DMRTA2   | 0.848884765 | 0.002315114 | 0.016074975 | 6.741522978  | 3.19563976  | Suprabasal  | SOX2              |
| 773 | ALCAM    | 0.848190649 | 0.007423146 | 0.022959455 | 11.32639601  | 3.871626927 | Superficial | SOX2 + KLF5, SOX2 |
| 774 | SKIV2L   | 0.848108426 | 0.000506425 | 0.007178523 | 13.76146259  | 4.464769501 | Superficial | SOX2              |
| 775 | DSC2     | 0.846921441 | 0.017811616 | 0.043066688 | 72.26288159  | 40.41740992 | Superficial | SOX2              |
| 776 | DTNBP1   | 0.846794959 | 0.021001058 | 0.04834985  | 14.28105129  | 4.932464707 | Superficial | SOX2 + KLF5       |
| 777 | BORCS5   | 0.846268858 | 0.002836074 | 0.012662188 | 20.25345521  | 7.504594465 | Superficial | SOX2              |
| 778 | POLE     | 0.846155403 | 0.002836074 | 0.0176927   | 7.470452375  | 3.782665953 | Suprabasal  | SOX2              |
| 779 | MAP3K8   | 0.845745236 | 0.004211401 | 0.027185186 | 25.65143559  | 12.18378813 | Basal       | SOX2, SOX2 + KLF5 |
| 780 | RUFY3    | 0.844831691 | 0.000635975 | 0.007274975 | 44.04485076  | 16.50861145 | Superficial | SOX2              |
| 781 | ITGA3    | 0.844554837 | 0.007423146 | 0.030449933 | 13.76692359  | 6.266478229 | Suprabasal  | SOX2              |
| 782 | ARFGF2   | 0.844127629 | 0.002315114 | 0.011381143 | 41.32971032  | 15.23832937 | Superficial | SOX2              |
| 783 | SPNS1    | 0.842942886 | 0.003462059 | 0.014108599 | 21.89951967  | 7.858241511 | Superficial | SOX2              |
| 784 | UBR5     | 0.842481048 | 0.006166656 | 0.020290909 | 41.02552479  | 15.33512244 | Superficial | SOX2              |
| 785 | ALG9     | 0.839853938 | 0.007423146 | 0.022959455 | 10.62872224  | 4.26325388  | Superficial | SOX2              |
| 786 | MTHFD1L  | 0.839822411 | 0.007423146 | 0.036548425 | 14.53056637  | 6.246920981 | Basal       | SOX2              |
| 787 | CHD4     | 0.839801259 | 0.000635975 | 0.007274975 | 57.16082184  | 26.07656657 | Superficial | SOX2              |
| 788 | OAF      | 0.839505259 | 0.003462059 | 0.019729589 | 13.15030459  | 5.79206902  | Suprabasal  | SOX2              |
| 789 | MAP4     | 0.839469094 | 0.000506425 | 0.007178523 | 56.55506459  | 24.597045   | Superficial | SOX2              |
| 790 | GLE1     | 0.835935781 | 0.008904627 | 0.025990329 | 16.91032054  | 5.336535038 | Superficial | SOX2              |
| 791 | NECTIN4  | 0.835610283 | 0.000635975 | 0.012925379 | 30.87073029  | 15.59987036 | Basal       | SOX2              |
| 792 | IWS1     | 0.83526127  | 0.001526458 | 0.009387421 | 33.72332735  | 12.23744966 | Superficial | SOX2              |
| 793 | RBM12    | 0.834785213 | 0.001232925 | 0.008679903 | 23.96776883  | 8.159807832 | Superficial | SOX2              |
| 794 | CCDC71L  | 0.834591944 | 0.006166656 | 0.020290909 | 18.69169873  | 6.190759114 | Superficial | SOX2              |
| 795 | MACC1    | 0.834417685 | 0.001883197 | 0.018415354 | 24.81749513  | 10.86425508 | Basal       | SOX2 + KLF5, SOX2 |
| 796 | HES1     | 0.834394053 | 0.015054848 | 0.038009884 | 72.77617354  | 40.31242283 | Superficial | SOX2              |
| 797 | DNMBP    | 0.834004899 | 0.017811616 | 0.043066688 | 12.19837134  | 4.683669686 | Superficial | SOX2 + KLF5       |
| 798 | EFL1     | 0.833887149 | 0.002836074 | 0.012662188 | 12.54418382  | 4.708387837 | Superficial | SOX2              |
| 799 | YLPMP1   | 0.833877819 | 0.004211401 | 0.016013117 | 21.200338158 | 7.420526934 | Superficial | SOX2              |
| 800 | PHC3     | 0.833132444 | 0.021001058 | 0.04834985  | 15.7324662   | 4.172159185 | Superficial | SOX2              |
| 801 | ARHGAP1  | 0.832801399 | 0.001526458 | 0.009387421 | 49.16523241  | 21.6705731  | Superficial | SOX2              |

|              |             |             |             |             |             |             |                   |
|--------------|-------------|-------------|-------------|-------------|-------------|-------------|-------------------|
| 802 MTMR4    | 0.832773168 | 0.012681065 | 0.033478436 | 12.61282616 | 4.384877816 | Superficial | SOX2              |
| 803 USP34    | 0.831927479 | 0.000250281 | 0.007176147 | 48.76179144 | 19.59301972 | Superficial | SOX2              |
| 804 LTN1     | 0.831844928 | 0.003462059 | 0.014108599 | 32.27681339 | 10.69037507 | Superficial | SOX2              |
| 805 SAMD8    | 0.83084174  | 0.007423146 | 0.022959455 | 30.77720131 | 12.43241064 | Superficial | SOX2              |
| 806 LTBP4    | 0.830027435 | 0.000795824 | 0.010838271 | 42.65305007 | 22.45104814 | Suprabasal  | SOX2              |
| 807 EFNB1    | 0.828770052 | 0.007423146 | 0.022959455 | 12.44857866 | 4.371969674 | Superficial | SOX2              |
| 808 TAF15    | 0.827829113 | 0.002836074 | 0.012662188 | 46.64494557 | 17.66507047 | Superficial | SOX2              |
| 809 ZNF205   | 0.827619182 | 0.006166656 | 0.020290909 | 9.321767583 | 3.501849539 | Superficial | SOX2              |
| 810 DSC3     | 0.82685136  | 0.021001058 | 0.04834985  | 60.40379599 | 27.05844558 | Superficial | SOX2 + KLF5, SOX2 |
| 811 TDG      | 0.826493209 | 0.005105016 | 0.018023407 | 45.1714113  | 18.47106601 | Superficial | SOX2              |
| 812 PPA2     | 0.825614967 | 0.000795824 | 0.007615337 | 45.85643088 | 18.36050404 | Superficial | SOX2              |
| 813 EPB41L2  | 0.825187272 | 0.012681065 | 0.042921737 | 13.2310882  | 5.383598174 | Suprabasal  | SOX2              |
| 814 RHOV     | 0.824745801 | 0.000506425 | 0.012898798 | 55.32474773 | 31.36023103 | Basal       | SOX2              |
| 815 THOC3    | 0.823897476 | 0.010644787 | 0.029507311 | 59.47882876 | 28.67750392 | Superficial | SOX2              |
| 816 TWf2     | 0.823549219 | 0.000992312 | 0.008042817 | 58.15254953 | 27.21826086 | Superficial | SOX2 + KLF5       |
| 817 ATRN     | 0.823194799 | 0.021001058 | 0.04834985  | 17.37967553 | 6.135836441 | Superficial | SOX2              |
| 818 PPL      | 0.822801611 | 0.000317696 | 0.012455402 | 57.78159745 | 33.11426547 | Basal       | SOX2, SOX2 + KLF5 |
| 819 FBXO38   | 0.822800065 | 0.000992312 | 0.008042817 | 19.93874301 | 6.63278819  | Superficial | SOX2              |
| 820 MRPS35   | 0.82271128  | 0.012681065 | 0.033478436 | 41.47677578 | 15.25102828 | Superficial | SOX2              |
| 821 ACAD9    | 0.822605788 | 0.000401828 | 0.007176147 | 36.21095613 | 14.39931058 | Superficial | SOX2 + KLF5       |
| 822 SNX12    | 0.822585602 | 0.006166656 | 0.020290909 | 25.06938895 | 11.27638862 | Superficial | SOX2              |
| 823 TFAP2A   | 0.820450997 | 0.002315114 | 0.011381143 | 42.82071234 | 17.82890683 | Superficial | SOX2              |
| 824 ATN1     | 0.819507951 | 0.000992312 | 0.008042817 | 32.18520156 | 12.76600372 | Superficial | SOX2              |
| 825 CPT2     | 0.818968522 | 0.015054848 | 0.038009884 | 23.64381963 | 8.697933431 | Superficial | SOX2              |
| 826 SPTLC2   | 0.817816947 | 0.008904627 | 0.025990329 | 58.58796534 | 29.63327216 | Superficial | SOX2              |
| 827 HACE1    | 0.816745618 | 0.008904627 | 0.034252903 | 13.23797985 | 6.170834204 | Suprabasal  | SOX2              |
| 828 PIM1     | 0.816682613 | 0.000506425 | 0.012898798 | 35.4644167  | 17.60863066 | Basal       | SOX2 + KLF5, SOX2 |
| 829 DHX16    | 0.816455155 | 0.000992312 | 0.008042817 | 20.49134581 | 7.234232442 | Superficial | SOX2              |
| 830 DNAAF2   | 0.815990058 | 0.008904627 | 0.025990329 | 12.88862781 | 5.011421676 | Superficial | SOX2              |
| 831 SDC1     | 0.813719129 | 0.002315114 | 0.011381143 | 87.75694466 | 66.95145226 | Superficial | SOX2              |
| 832 ELL3     | 0.813317704 | 0.015054848 | 0.048140298 | 7.192728655 | 3.329046936 | Suprabasal  | SOX2              |
| 833 CCNE1    | 0.812722988 | 0.001883197 | 0.018415354 | 11.8773326  | 5.413782807 | Basal       | SOX2              |
| 834 PLXNB2   | 0.812108846 | 0.001232925 | 0.015721789 | 46.65187659 | 22.95899987 | Basal       | SOX2              |
| 835 WDR47    | 0.811734977 | 5.55E-05    | 0.012455402 | 35.21788058 | 15.80573817 | Basal       | SOX2              |
| 836 MID1IP1  | 0.810782697 | 0.002836074 | 0.012662188 | 33.06994348 | 13.45685532 | Superficial | SOX2              |
| 837 MFN1     | 0.810406977 | 0.000795824 | 0.007615337 | 37.4800731  | 14.78617492 | Superficial | SOX2              |
| 838 EFNA4    | 0.809859537 | 0.003462059 | 0.014108599 | 21.55207442 | 7.257920127 | Superficial | SOX2              |
| 839 ARMCX3   | 0.808889184 | 0.001883197 | 0.010234018 | 22.49931016 | 7.20222225  | Superficial | SOX2              |
| 840 DDX46    | 0.808617792 | 0.001883197 | 0.010234018 | 55.8352134  | 23.18074829 | Superficial | SOX2              |
| 841 NXF1     | 0.808612993 | 0.021001058 | 0.04834985  | 18.32360737 | 7.616265295 | Superficial | SOX2              |
| 842 NDUFV1   | 0.808605636 | 0.008904627 | 0.025990329 | 58.69079218 | 25.16361058 | Superficial | SOX2              |
| 843 KIF1C    | 0.808132244 | 0.000401828 | 0.012455402 | 35.31714962 | 16.56280017 | Basal       | SOX2              |
| 844 CCKND2D  | 0.807747808 | 0.017811616 | 0.043066688 | 31.18476328 | 12.50599597 | Superficial | SOX2              |
| 845 TMED5    | 0.807701462 | 0.001883197 | 0.010234018 | 40.71109999 | 16.55487528 | Superficial | SOX2              |
| 846 ANKRD22  | 0.804461386 | 0.001526458 | 0.009387421 | 53.90767745 | 23.26610733 | Superficial | SOX2              |
| 847 MCPH1    | 0.800090408 | 0.012681065 | 0.033478436 | 17.43680128 | 6.513088304 | Superficial | SOX2              |
| 848 FNDC3A   | 0.800001038 | 0.004211401 | 0.016013117 | 20.19240284 | 7.23045575  | Superficial | SOX2              |
| 849 SIRT1    | 0.799938477 | 0.007423146 | 0.022959455 | 14.80977543 | 4.692575729 | Superficial | SOX2              |
| 850 LRPPRC   | 0.798944589 | 0.021001058 | 0.04834985  | 31.40078505 | 9.816116635 | Superficial | SOX2              |
| 851 ATP5F1A  | 0.798738249 | 0.006166656 | 0.020290909 | 71.23746796 | 38.86356897 | Superficial | SOX2              |
| 852 CPSF2    | 0.798423626 | 0.000992312 | 0.008042817 | 34.48820073 | 13.36730562 | Superficial | SOX2              |
| 853 UBALD2   | 0.798313434 | 0.000250281 | 0.012455402 | 58.45055428 | 32.53669687 | Basal       | SOX2              |
| 854 SFPQ     | 0.797818023 | 0.001232925 | 0.008679903 | 61.97537887 | 29.57785022 | Superficial | SOX2              |
| 855 SLC52A2  | 0.797173775 | 0.010644787 | 0.029507311 | 28.79074487 | 10.90435535 | Superficial | SOX2              |
| 856 NFRKB    | 0.797033244 | 0.004211401 | 0.016013117 | 12.0529207  | 4.844985206 | Superficial | SOX2              |
| 857 ABHD13   | 0.796556468 | 0.000992312 | 0.008042817 | 22.41406526 | 8.264951864 | Superficial | SOX2              |
| 858 ARHGAP21 | 0.795336566 | 0.004211401 | 0.021879278 | 36.03350368 | 18.17611891 | Suprabasal  | SOX2              |
| 859 EVPL     | 0.793544001 | 0.000795824 | 0.0136425   | 44.99753962 | 23.63771042 | Basal       | SOX2              |
| 860 MSH3     | 0.793458301 | 0.003462059 | 0.014108599 | 22.98398105 | 7.918764414 | Superficial | SOX2              |
| 861 ARL1     | 0.79214833  | 0.001232925 | 0.008679903 | 71.80733536 | 42.39486522 | Superficial | SOX2              |
| 862 KCTD1    | 0.790819901 | 0.000795824 | 0.007615337 | 50.90920202 | 21.19738831 | Superficial | SOX2, SOX2 + KLF5 |
| 863 FAM199X  | 0.790489698 | 0.000992312 | 0.008042817 | 33.68678037 | 12.41133265 | Superficial | SOX2              |
| 864 IPPK     | 0.790086212 | 0.021001058 | 0.04834985  | 32.36939208 | 11.4416446  | Superficial | SOX2              |
| 865 GRIPAP1  | 0.790033602 | 0.000992312 | 0.008042817 | 32.41525033 | 11.48465582 | Superficial | SOX2              |
| 866 IGSF8    | 0.789619705 | 0.002315114 | 0.011381143 | 14.91047128 | 5.385316998 | Superficial | SOX2              |
| 867 SMARCE1  | 0.788128386 | 0.000401828 | 0.007176147 | 53.98102131 | 23.8797572  | Superficial | SOX2              |
| 868 PAK1     | 0.786995191 | 0.000635975 | 0.007274975 | 29.64145241 | 11.08264459 | Superficial | SOX2              |
| 869 SLC22A18 | 0.786650694 | 0.000992312 | 0.008042817 | 27.90101417 | 9.786049759 | Superficial | SOX2              |
| 870 SCRIB    | 0.785180723 | 0.000317696 | 0.012455402 | 24.07048471 | 10.71812052 | Basal       | SOX2              |
| 871 PPP2R1B  | 0.785024498 | 0.002836074 | 0.012662188 | 28.21036033 | 10.75997223 | Superficial | SOX2              |
| 872 KLIK10   | 0.784915262 | 0.001883197 | 0.018415354 | 49.63143813 | 30.40373894 | Basal       | SOX2              |
| 873 ESRP2    | 0.784736975 | 0.003462059 | 0.014108599 | 49.49809927 | 23.21995429 | Superficial | SOX2              |
| 874 DSP      | 0.78419116  | 0.000506425 | 0.012898798 | 95.57120634 | 83.16967388 | Basal       | SOX2, SOX2 + KLF5 |

|     |           |             |             |             |             |             |             |                   |
|-----|-----------|-------------|-------------|-------------|-------------|-------------|-------------|-------------------|
| 875 | SUPT6H    | 0.783663486 | 0.001883197 | 0.010234018 | 39.09967722 | 17.04241278 | Superficial | SOX2              |
| 876 | NSD1      | 0.782623544 | 0.000250281 | 0.007176147 | 44.34785098 | 18.99005533 | Superficial | SOX2              |
| 877 | RARG      | 0.781083073 | 0.000401828 | 0.007176147 | 76.26745981 | 42.47873787 | Superficial | SOX2              |
| 878 | RASSF6    | 0.780974466 | 0.021001058 | 0.04834985  | 19.09196449 | 5.374914478 | Superficial | SOX2, SOX2 + KLF5 |
| 879 | TRIM5     | 0.780767742 | 0.021001058 | 0.04834985  | 14.72009644 | 4.341097256 | Superficial | SOX2              |
| 880 | ARHGAP35  | 0.779858557 | 0.000795824 | 0.007615337 | 30.72874296 | 11.10752697 | Superficial | SOX2              |
| 881 | TBRG4     | 0.777140895 | 0.017811616 | 0.043066688 | 23.73424314 | 8.528389369 | Superficial | SOX2              |
| 882 | TRABD     | 0.776314911 | 0.006166656 | 0.020290909 | 44.64577932 | 19.65405638 | Superficial | SOX2              |
| 883 | ARMCX6    | 0.776127211 | 0.001883197 | 0.010234018 | 31.53888816 | 12.22350712 | Superficial | SOX2              |
| 884 | NCOA5     | 0.775988711 | 0.008904627 | 0.025990329 | 9.113392929 | 3.455771311 | Superficial | SOX2              |
| 885 | FRMD4B    | 0.772823978 | 0.001526458 | 0.009387421 | 72.27208121 | 40.58876961 | Superficial | SOX2              |
| 886 | LAP3      | 0.771547699 | 0.001883197 | 0.010234018 | 40.8294852  | 15.63526895 | Superficial | SOX2              |
| 887 | CDC42BPB  | 0.770069085 | 0.000153669 | 0.012455402 | 39.33363482 | 18.95615945 | Basal       | SOX2              |
| 888 | SLC7A8    | 0.768503851 | 0.003462059 | 0.014108599 | 23.18110177 | 9.569188016 | Superficial | SOX2              |
| 889 | TMEM154   | 0.766978768 | 0.010644787 | 0.029507311 | 73.62469979 | 44.77279121 | Superficial | SOX2              |
| 890 | TXN       | 0.766068419 | 0.017811616 | 0.043066688 | 94.92987078 | 90.59413398 | Superficial | SOX2              |
| 891 | CAAP1     | 0.765982227 | 0.001232925 | 0.008679903 | 27.8715948  | 10.35073339 | Superficial | SOX2              |
| 892 | ZNF407    | 0.765275288 | 0.005105016 | 0.018023407 | 9.565013872 | 2.98368203  | Superficial | SOX2              |
| 893 | TAB1      | 0.765243129 | 0.008904627 | 0.025990329 | 7.66350226  | 2.519377628 | Superficial | SOX2              |
| 894 | TPM4      | 0.765005693 | 0.002836074 | 0.022562695 | 83.37863428 | 60.677827   | Basal       | SOX2              |
| 895 | UTP6      | 0.764059543 | 0.001883197 | 0.010234018 | 24.32650647 | 9.796163309 | Superficial | SOX2              |
| 896 | ZNF142    | 0.763854846 | 0.000795824 | 0.010838271 | 7.199945873 | 3.709384109 | Suprabasal  | SOX2              |
| 897 | USP7      | 0.762927097 | 0.00506425  | 0.007178523 | 57.37381352 | 26.69855543 | Superficial | SOX2              |
| 898 | TKFC      | 0.762788105 | 0.021001058 | 0.04834985  | 15.27432299 | 5.605121704 | Superficial | SOX2              |
| 899 | TTC17     | 0.761819095 | 0.008904627 | 0.025990329 | 24.36359453 | 8.844420798 | Superficial | SOX2              |
| 900 | PXK       | 0.758536609 | 0.005105016 | 0.018023407 | 14.76121213 | 4.158985349 | Superficial | SOX2              |
| 901 | NMB       | 0.757007026 | 0.003462059 | 0.024854712 | 19.49023009 | 8.735687673 | Basal       | SOX2              |
| 902 | PIGK      | 0.75685835  | 0.010644787 | 0.029507311 | 10.61173633 | 3.827762891 | Superficial | SOX2              |
| 903 | PRPF40A   | 0.755048603 | 0.000795824 | 0.007615337 | 58.42226805 | 27.22883402 | Superficial | SOX2              |
| 904 | RIPK4     | 0.753786917 | 0.000506425 | 0.010489143 | 56.92429997 | 34.29619525 | Suprabasal  | SOX2              |
| 905 | MARCKSL1  | 0.753039523 | 0.005105016 | 0.029792864 | 19.57397271 | 7.984022926 | Basal       | SOX2              |
| 906 | COX10     | 0.75216747  | 0.017811616 | 0.043066688 | 15.53587995 | 5.187538716 | Superficial | SOX2              |
| 907 | XRN2      | 0.751931606 | 0.008904627 | 0.025990329 | 38.10142195 | 14.27251888 | Superficial | SOX2              |
| 908 | POR       | 0.751814117 | 0.000992312 | 0.008042817 | 66.781586   | 35.01139862 | Superficial | KLF5, SOX2        |
| 909 | MECOM     | 0.750699729 | 0.002315114 | 0.016074975 | 56.52334109 | 32.74640448 | Suprabasal  | KLF5              |
| 910 | PLP2      | 0.749774242 | 0.010644787 | 0.029507311 | 77.34020689 | 49.58391191 | Superficial | SOX2              |
| 911 | RAB11FIP4 | 0.74958562  | 0.002836074 | 0.022562695 | 11.93939559 | 4.465728883 | Basal       | SOX2              |
| 912 | CRADD     | 0.748667913 | 0.007423146 | 0.022959455 | 14.26033086 | 4.924503899 | Superficial | SOX2 + KLF5       |
| 913 | ATXN7L3B  | 0.748484548 | 0.000153669 | 0.007176147 | 44.03819642 | 18.55042579 | Superficial | SOX2              |
| 914 | GRIP1     | 0.747835615 | 0.003462059 | 0.019729589 | 7.134486236 | 3.06073658  | Suprabasal  | SOX2 + KLF5       |
| 915 | NIPAL1    | 0.747293766 | 0.001883197 | 0.010234018 | 58.7054824  | 29.04320719 | Superficial | SOX2              |
| 916 | RASA1     | 0.747100481 | 0.003462059 | 0.014108599 | 25.67635873 | 8.934911271 | Superficial | SOX2              |
| 917 | MFSD6     | 0.746746359 | 0.012681065 | 0.033478436 | 53.60128769 | 24.41723396 | Superficial | SOX2              |
| 918 | INTS2     | 0.746668773 | 0.010644787 | 0.029507311 | 8.778939305 | 2.442925882 | Superficial | SOX2              |
| 919 | CDC34     | 0.746367735 | 0.001526458 | 0.013290882 | 40.02681251 | 19.40977035 | Suprabasal  | SOX2              |
| 920 | UBR7      | 0.74631484  | 0.012681065 | 0.033478436 | 16.05246902 | 5.706209921 | Superficial | SOX2              |
| 921 | SNTB2     | 0.745802206 | 0.001883197 | 0.010234018 | 27.06126241 | 9.939822852 | Superficial | SOX2              |
| 922 | MAN1A2    | 0.744280933 | 0.001883197 | 0.010234018 | 50.53089819 | 20.95246014 | Superficial | SOX2              |
| 923 | NDUFA8    | 0.743813982 | 0.004211401 | 0.016013117 | 56.18648971 | 26.12503468 | Superficial | SOX2              |
| 924 | EIF3B     | 0.74245088  | 0.005105016 | 0.018023407 | 43.13425729 | 17.85244483 | Superficial | SOX2              |
| 925 | POLR3B    | 0.74062025  | 0.000506425 | 0.007178523 | 21.82467954 | 8.464220903 | Superficial | SOX2              |
| 926 | WNK4      | 0.739616678 | 0.008904627 | 0.025990329 | 16.96339688 | 6.600647357 | Superficial | SOX2              |
| 927 | MRPS30    | 0.739498814 | 0.010644787 | 0.029507311 | 26.85606255 | 9.562664138 | Superficial | SOX2              |
| 928 | RBBP8NL   | 0.738379695 | 0.008904627 | 0.025990329 | 18.58587441 | 7.808829489 | Superficial | SOX2              |
| 929 | ARFGAP3   | 0.737414745 | 0.004211401 | 0.016013117 | 34.43334593 | 13.93679235 | Superficial | SOX2 + KLF5       |
| 930 | PRRC2B    | 0.737288087 | 0.004211401 | 0.016013117 | 37.54429978 | 15.16190471 | Superficial | SOX2              |
| 931 | CLIC4     | 0.737162028 | 0.007423146 | 0.036548425 | 18.68317984 | 8.50586959  | Basal       | SOX2              |
| 932 | AFDN      | 0.736654672 | 5.55E-05    | 0.012455402 | 48.38939108 | 25.14959746 | Basal       | SOX2              |
| 933 | PHF13     | 0.73612879  | 0.000635975 | 0.012925379 | 18.94767185 | 8.609546677 | Basal       | SOX2              |
| 934 | ZYX       | 0.735779973 | 0.015054848 | 0.038009884 | 36.28202793 | 16.07075639 | Superficial | SOX2              |
| 935 | TMEM98    | 0.735476257 | 0.008904627 | 0.034252903 | 30.33653877 | 14.52821983 | Suprabasal  | SOX2              |
| 936 | BICDL2    | 0.735059923 | 0.002315114 | 0.020052792 | 22.07254004 | 10.57748777 | Basal       | SOX2              |
| 937 | PRC1      | 0.734220942 | 0.002836074 | 0.022562695 | 44.06968575 | 25.03313541 | Basal       | SOX2              |
| 938 | ZNF131    | 0.733472982 | 0.002315114 | 0.011381143 | 25.08109627 | 8.963884002 | Superficial | SOX2              |
| 939 | PIK3R1    | 0.733066436 | 0.007423146 | 0.022959455 | 19.32332041 | 6.742500994 | Superficial | SOX2              |
| 940 | BST2      | 0.732636317 | 0.012681065 | 0.049425568 | 41.46014877 | 20.02884409 | Basal       | SOX2              |
| 941 | MGST3     | 0.732351335 | 0.010644787 | 0.029507311 | 65.51241176 | 32.75084606 | Superficial | SOX2              |
| 942 | HTATIP2   | 0.732198546 | 0.005105016 | 0.018023407 | 54.11311985 | 24.77233011 | Superficial | SOX2              |
| 943 | ZPR1      | 0.730854063 | 0.017811616 | 0.043066688 | 28.17455576 | 10.73635346 | Superficial | SOX2              |
| 944 | URI1      | 0.730252363 | 0.000795824 | 0.007615337 | 48.99660551 | 20.34154253 | Superficial | SOX2              |
| 945 | EZR       | 0.72742657  | 0.002315114 | 0.020052792 | 82.97696886 | 59.68243158 | Basal       | SOX2 + KLF5, SOX2 |
| 946 | TMEM184A  | 0.726810155 | 0.006166656 | 0.032981404 | 16.76278201 | 7.803146974 | Basal       | SOX2              |
| 947 | GRB7      | 0.726375743 | 0.000317696 | 0.012455402 | 39.18241856 | 19.55517725 | Basal       | SOX2              |

|               |             |             |             |             |             |             |                   |
|---------------|-------------|-------------|-------------|-------------|-------------|-------------|-------------------|
| 948 MRPL4     | 0.726193947 | 0.008904627 | 0.025990329 | 43.49259063 | 17.67791629 | Superficial | SOX2              |
| 949 AKAP13    | 0.72614015  | 0.000635975 | 0.007274975 | 69.84387281 | 38.37719104 | Superficial | SOX2              |
| 950 ICMT      | 0.726052153 | 0.000992312 | 0.014320968 | 39.13219758 | 20.3780701  | Basal       | SOX2              |
| 951 G3BP1     | 0.72578975  | 0.017811616 | 0.043066688 | 45.8882534  | 18.82497802 | Superficial | SOX2              |
| 952 INPP5F    | 0.725043383 | 0.007423146 | 0.022959455 | 13.93767328 | 4.990127193 | Superficial | SOX2              |
| 953 RNF138    | 0.724834032 | 0.017811616 | 0.043066688 | 16.12579921 | 5.149135029 | Superficial | SOX2              |
| 954 ETV3      | 0.724257442 | 0.006166656 | 0.027303057 | 36.51993618 | 18.36824247 | Suprabasal  | SOX2              |
| 955 PBDC1     | 0.724096304 | 0.007423146 | 0.022959455 | 47.58340403 | 19.4017906  | Superficial | SOX2              |
| 956 TBC1D4    | 0.722873499 | 0.017811616 | 0.043066688 | 9.618053519 | 3.152159836 | Superficial | SOX2              |
| 957 WWC2      | 0.722704636 | 0.000635975 | 0.012925379 | 14.52289953 | 5.932481265 | Basal       | SOX2              |
| 958 CD82      | 0.721546364 | 0.012681065 | 0.033478436 | 57.52904438 | 27.31531055 | Superficial | SOX2              |
| 959 PFKP      | 0.720566334 | 0.002836074 | 0.022562695 | 42.15295301 | 21.9314053  | Basal       | SOX2              |
| 960 GTF3C5    | 0.72007063  | 0.001526458 | 0.009387421 | 28.57071781 | 12.03709938 | Superficial | SOX2              |
| 961 SUGT1     | 0.719687512 | 0.001232925 | 0.008679903 | 60.55400256 | 28.61191437 | Superficial | SOX2              |
| 962 EIF4G1    | 0.718208604 | 0.000635975 | 0.012925379 | 63.74988687 | 36.77598904 | Basal       | SOX2              |
| 963 RHBDD2    | 0.717960761 | 0.000992312 | 0.01142308  | 43.30584464 | 25.55995337 | Suprabasal  | SOX2              |
| 964 RAB3IP    | 0.717948673 | 0.001232925 | 0.012246384 | 18.14985456 | 8.781444715 | Suprabasal  | SOX2              |
| 965 GOPC      | 0.717192669 | 0.000506425 | 0.007178523 | 40.99698046 | 17.8396565  | Superficial | SOX2              |
| 966 CA13      | 0.716964043 | 0.012681065 | 0.033478436 | 26.84068309 | 9.406202184 | Superficial | SOX2              |
| 967 FOXP4     | 0.716400668 | 0.000635975 | 0.012925379 | 10.1266356  | 4.367339639 | Basal       | SOX2              |
| 968 DIAPH1    | 0.715897124 | 0.000992312 | 0.014320968 | 49.98329195 | 26.85333151 | Basal       | SOX2              |
| 969 MPHOSPH10 | 0.715736333 | 0.006166656 | 0.020290909 | 41.49656213 | 16.38485875 | Superficial | SOX2              |
| 970 PPIC      | 0.715013805 | 0.015054848 | 0.038009884 | 68.41924217 | 34.96201968 | Superficial | SOX2              |
| 971 KHDRBS1   | 0.714588018 | 0.000401828 | 0.007176147 | 62.73550413 | 29.47083304 | Superficial | SOX2              |
| 972 UTP3      | 0.714515084 | 0.006166656 | 0.020290909 | 25.70999785 | 9.52559203  | Superficial | SOX2              |
| 973 SPEN      | 0.713127731 | 0.002836074 | 0.012662188 | 48.98677362 | 21.73061439 | Superficial | SOX2              |
| 974 KREMEN1   | 0.713062714 | 0.000401828 | 0.012455402 | 51.12077132 | 27.52790114 | Basal       | SOX2              |
| 975 TMMEM147  | 0.712669208 | 0.007423146 | 0.022959455 | 72.89427386 | 49.57190643 | Superficial | SOX2              |
| 976 TOM1L1    | 0.712554624 | 0.004211401 | 0.016013117 | 23.61587939 | 8.747457616 | Superficial | SOX2              |
| 977 TECPR2    | 0.712470979 | 9.30E-05    | 0.010489143 | 13.29861592 | 6.763670291 | Suprabasal  | SOX2              |
| 978 NR6A1     | 0.711946773 | 0.002315114 | 0.016074975 | 14.65826514 | 7.063050314 | Suprabasal  | SOX2              |
| 979 KHDRBS3   | 0.710487783 | 0.000635975 | 0.012925379 | 11.98724433 | 5.379939887 | Basal       | SOX2 + KLF5       |
| 980 GTF3C2    | 0.70899392  | 0.002836074 | 0.012662188 | 27.90357716 | 11.75661752 | Superficial | SOX2              |
| 981 SETD7     | 0.708207417 | 0.000635975 | 0.007274975 | 27.99014587 | 13.201659   | Superficial | SOX2              |
| 982 PARD6G    | 0.708078019 | 0.004211401 | 0.016013117 | 44.41779238 | 18.59663141 | Superficial | SOX2              |
| 983 LASP1     | 0.70727919  | 0.001526458 | 0.016792744 | 36.89944035 | 16.6859833  | Basal       | SOX2              |
| 984 MIPEP     | 0.707166754 | 0.021001058 | 0.04834985  | 10.893853   | 3.702076167 | Superficial | SOX2 + KLF5, SOX2 |
| 985 LEMD3     | 0.706801908 | 0.006166656 | 0.020290909 | 18.31855904 | 5.567001364 | Superficial | SOX2              |
| 986 IER3      | 0.705746954 | 0.005105016 | 0.029792864 | 91.0662064  | 71.33517237 | Basal       | SOX2              |
| 987 TMS9F3    | 0.705468786 | 0.000317696 | 0.007176147 | 75.11455963 | 44.74854753 | Superficial | SOX2              |
| 988 TPST2     | 0.705368445 | 0.008904627 | 0.025990329 | 29.58094075 | 12.14561785 | Superficial | SOX2              |
| 989 MAST4     | 0.70518553  | 0.015054848 | 0.038009884 | 60.88267442 | 33.03507244 | Superficial | SOX2              |
| 990 PPP1R3D   | 0.705122846 | 0.001883197 | 0.010234018 | 23.83506292 | 9.135189693 | Superficial | SOX2              |
| 991 SENP6     | 0.703318284 | 0.001526458 | 0.009387421 | 39.02975419 | 15.42974016 | Superficial | SOX2              |
| 992 FAM83H    | 0.702860491 | 0.002315114 | 0.020052792 | 35.23918804 | 17.10164149 | Basal       | SOX2              |
| 993 HIP1R     | 0.702694987 | 0.001526458 | 0.016792744 | 11.04972321 | 4.742867003 | Basal       | SOX2              |
| 994 USP40     | 0.702333154 | 0.006166656 | 0.027303057 | 29.51910976 | 16.18770834 | Suprabasal  | SOX2              |
| 995 PPARA     | 0.702123681 | 0.000153669 | 0.010489143 | 30.47842317 | 16.4040569  | Suprabasal  | SOX2              |
| 996 NECTIN2   | 0.701897768 | 0.000250281 | 0.012455402 | 33.17085744 | 15.91725556 | Basal       | SOX2              |
| 997 XPO7      | 0.701674727 | 0.012681065 | 0.033478436 | 17.37725907 | 6.268661514 | Superficial | SOX2              |
| 998 MUS81     | 0.701670445 | 0.008904627 | 0.025990329 | 10.32278069 | 4.818304548 | Superficial | SOX2              |
| 999 YRDC      | 0.69921272  | 0.003462059 | 0.014108599 | 21.51501832 | 8.558992813 | Superficial | SOX2              |
| 1000 BRD1     | 0.699059598 | 0.002315114 | 0.016074975 | 42.85777072 | 23.81696503 | Suprabasal  | SOX2              |
| 1001 SEMA4D   | 0.699049431 | 0.006166656 | 0.020290909 | 29.50955164 | 12.78839383 | Superficial | SOX2              |
| 1002 TRUB2    | 0.698692417 | 0.017811616 | 0.043066688 | 28.49174933 | 11.26687257 | Superficial | SOX2              |
| 1003 SEC63    | 0.698476952 | 0.012681065 | 0.033478436 | 36.80728048 | 14.45232384 | Superficial | SOX2              |
| 1004 ATP5F1D  | 0.698358337 | 0.007423146 | 0.022959455 | 82.5012794  | 63.14211755 | Superficial | SOX2              |
| 1005 AJUBA    | 0.697980755 | 0.015054848 | 0.048140298 | 24.81183555 | 12.03369669 | Suprabasal  | SOX2              |
| 1006 RWDD4    | 0.696875045 | 0.000401828 | 0.007176147 | 51.77094435 | 24.11983066 | Superficial | SOX2              |
| 1007 NACC1    | 0.696463116 | 0.000506425 | 0.012898798 | 20.19965077 | 9.054914034 | Basal       | SOX2              |
| 1008 FLNA     | 0.695574276 | 0.001883197 | 0.018415354 | 68.91808084 | 43.431091   | Basal       | SOX2              |
| 1009 SHROOM3  | 0.695335913 | 0.007423146 | 0.036548425 | 9.574191785 | 3.812745015 | Basal       | SOX2 + KLF5, SOX2 |
| 1010 SLTM     | 0.695313462 | 0.000506425 | 0.007178523 | 63.31126801 | 31.76210791 | Superficial | SOX2              |
| 1011 SCAPER   | 0.694072236 | 0.007423146 | 0.022959455 | 27.74667976 | 10.29388181 | Superficial | SOX2              |
| 1012 MON1B    | 0.693303248 | 0.006166656 | 0.020290909 | 27.61617344 | 11.3071686  | Superficial | SOX2              |
| 1013 NPC1     | 0.692962549 | 0.004211401 | 0.027185186 | 15.36013339 | 6.703777517 | Basal       | SOX2              |
| 1014 TAX1BP3  | 0.692447302 | 0.005105016 | 0.018023407 | 78.13399476 | 51.10089037 | Superficial | SOX2              |
| 1015 SGM51    | 0.691297817 | 0.000635975 | 0.010733065 | 29.86271925 | 15.19705323 | Suprabasal  | SOX2 + KLF5       |
| 1016 SDC4     | 0.690969578 | 0.001883197 | 0.018415354 | 63.26780819 | 36.20162181 | Basal       | SOX2              |
| 1017 RING1    | 0.690902998 | 0.002836074 | 0.012662188 | 22.65387288 | 9.21827708  | Superficial | SOX2              |
| 1018 SUSD4    | 0.688905232 | 0.006166656 | 0.020290909 | 48.73984961 | 21.34803969 | Superficial | KLF5, SOX2        |
| 1019 POLR3D   | 0.687357327 | 0.003462059 | 0.014108599 | 20.8707821  | 7.43613414  | Superficial | SOX2              |
| 1020 PSMB4    | 0.685299892 | 0.001526458 | 0.009387421 | 58.61299947 | 27.96010638 | Superficial | SOX2              |

|      |           |             |             |             |             |             |             |                   |
|------|-----------|-------------|-------------|-------------|-------------|-------------|-------------|-------------------|
| 1021 | HSPB1     | 0.684800626 | 0.012681065 | 0.033478436 | 98.45290194 | 93.43259814 | Superficial | SOX2              |
| 1022 | EGRF      | 0.684370469 | 0.010644787 | 0.029507311 | 41.9502083  | 15.63246924 | Superficial | SOX2              |
| 1023 | GTF3C1    | 0.683517925 | 0.004211401 | 0.016013117 | 60.9092851  | 33.78517881 | Superficial | SOX2              |
| 1024 | ADGRL2    | 0.683192397 | 0.008904627 | 0.040392504 | 10.7417921  | 4.139408272 | Basal       | SOX2              |
| 1025 | HDAC5     | 0.682742832 | 0.015054848 | 0.038009884 | 13.30421243 | 4.220842783 | Superficial | SOX2              |
| 1026 | CEP55     | 0.682070144 | 0.001232925 | 0.015721789 | 33.14551567 | 19.35039483 | Basal       | SOX2              |
| 1027 | ASH2L     | 0.681737225 | 0.001883197 | 0.010234018 | 23.09281134 | 8.409669845 | Superficial | SOX2              |
| 1028 | USP37     | 0.681305269 | 0.000992312 | 0.01142308  | 15.85613317 | 8.095477402 | Suprabasal  | SOX2              |
| 1029 | COBL      | 0.681239795 | 0.015054848 | 0.038009884 | 31.42195234 | 12.03903453 | Superficial | SOX2              |
| 1030 | CDC42SE2  | 0.679917135 | 0.017811616 | 0.043066688 | 13.52002582 | 5.114852508 | Superficial | SOX2              |
| 1031 | LSM14B    | 0.678316094 | 0.012681065 | 0.033478436 | 21.66978744 | 8.709179062 | Superficial | SOX2              |
| 1032 | KLHL21    | 0.677983908 | 0.000401828 | 0.012455402 | 38.21633848 | 18.43710045 | Basal       | SOX2              |
| 1033 | CASP7     | 0.677572835 | 0.004211401 | 0.021879278 | 32.86386227 | 16.70000183 | Suprabasal  | SOX2              |
| 1034 | CCSAP     | 0.675473422 | 0.000250281 | 0.012455402 | 15.54470514 | 7.578541078 | Basal       | SOX2              |
| 1035 | BRI3BP    | 0.675241931 | 0.017811616 | 0.043066688 | 27.70199565 | 10.31740369 | Superficial | SOX2              |
| 1036 | ELP3      | 0.674993585 | 0.007423146 | 0.022959455 | 12.44484451 | 4.645805987 | Superficial | SOX2              |
| 1037 | XPNPEP1   | 0.673875063 | 0.012681065 | 0.033478436 | 22.6153257  | 8.807703763 | Superficial | SOX2              |
| 1038 | TSPAN31   | 0.673329211 | 0.007423146 | 0.022959455 | 32.32370625 | 14.57475959 | Superficial | SOX2              |
| 1039 | GATAD1    | 0.672889383 | 9.30E-05    | 0.007176147 | 33.34992132 | 13.42729982 | Superficial | SOX2              |
| 1040 | SBNO1     | 0.67149385  | 0.001232925 | 0.008679903 | 39.14640306 | 15.55429681 | Superficial | SOX2              |
| 1041 | TTC23     | 0.670929937 | 0.004211401 | 0.016013117 | 11.357851   | 5.074134562 | Superficial | SOX2              |
| 1042 | TBRG1     | 0.670360458 | 9.30E-05    | 0.007176147 | 35.02731125 | 14.25893381 | Superficial | SOX2              |
| 1043 | MYO1D     | 0.670223138 | 0.001883197 | 0.010234018 | 48.98232321 | 23.24023778 | Superficial | SOX2              |
| 1044 | AGAP3     | 0.669761063 | 0.001232925 | 0.008679903 | 41.32602591 | 18.75107029 | Superficial | SOX2              |
| 1045 | DAXX      | 0.668789997 | 0.003462059 | 0.014108599 | 30.21577035 | 12.06403782 | Superficial | SOX2              |
| 1046 | YKT6      | 0.668035629 | 0.001526458 | 0.016792744 | 26.64004822 | 12.79324033 | Basal       | SOX2              |
| 1047 | CDK17     | 0.668015169 | 0.003462059 | 0.019729589 | 16.41360549 | 8.270330179 | Suprabasal  | SOX2              |
| 1048 | MAL2      | 0.666971971 | 0.000992312 | 0.014320968 | 67.6656544  | 46.069602   | Basal       | SOX2, SOX2 + KLF5 |
| 1049 | LGALS8    | 0.666036557 | 0.005105016 | 0.018023407 | 31.07031235 | 15.28461671 | Superficial | SOX2              |
| 1050 | SLC44A2   | 0.665545253 | 0.007423146 | 0.022959455 | 61.18924802 | 32.86938981 | Superficial | SOX2              |
| 1051 | ZBTB17    | 0.665396487 | 0.000795824 | 0.007615337 | 15.53672061 | 6.058259512 | Superficial | SOX2              |
| 1052 | RABAC1    | 0.665008765 | 0.006166656 | 0.020290909 | 73.60564023 | 45.0711054  | Superficial | SOX2              |
| 1053 | TNFRSF10B | 0.663928537 | 0.012681065 | 0.042921737 | 8.142564324 | 4.107895104 | Suprabasal  | SOX2              |
| 1054 | PHF10     | 0.663225937 | 0.001232925 | 0.012246384 | 57.30647758 | 35.85848239 | Suprabasal  | SOX2              |
| 1055 | CDC25A    | 0.662365282 | 0.003462059 | 0.024854712 | 11.09681846 | 5.301737689 | Basal       | SOX2              |
| 1056 | JOSD2     | 0.661599184 | 0.001883197 | 0.010234018 | 65.70995211 | 35.94558676 | Superficial | SOX2              |
| 1057 | TAF6      | 0.661561026 | 0.001526458 | 0.009387421 | 16.25357545 | 6.858573155 | Superficial | SOX2              |
| 1058 | PSMC2     | 0.661474033 | 0.008904627 | 0.025990329 | 48.13192169 | 20.69490945 | Superficial | SOX2              |
| 1059 | INTS10    | 0.661149836 | 0.021001058 | 0.04834985  | 25.09640797 | 9.976829546 | Superficial | SOX2              |
| 1060 | NUP50     | 0.660882124 | 0.010644787 | 0.038255467 | 53.95810736 | 32.51693783 | Suprabasal  | SOX2              |
| 1061 | B3GNT2    | 0.659308899 | 0.015054848 | 0.038009884 | 48.76608833 | 22.08346533 | Superficial | SOX2 + KLF5, SOX2 |
| 1062 | TEAD4     | 0.65922919  | 0.000795824 | 0.0136425   | 17.22245281 | 8.132829946 | Basal       | SOX2              |
| 1063 | MIDN      | 0.658466962 | 0.010644787 | 0.029507311 | 76.35570508 | 51.43854435 | Superficial | SOX2              |
| 1064 | IL13RA1   | 0.658415331 | 0.000506425 | 0.012898798 | 29.98096386 | 15.03877761 | Basal       | SOX2              |
| 1065 | PRR14L    | 0.658376186 | 0.000506425 | 0.007178523 | 42.93223762 | 17.25211076 | Superficial | SOX2              |
| 1066 | AARS2     | 0.658110216 | 0.010644787 | 0.029507311 | 10.38037111 | 3.661738738 | Superficial | SOX2              |
| 1067 | LRP6      | 0.656261512 | 0.001883197 | 0.014679007 | 10.47197382 | 5.225409838 | Suprabasal  | SOX2              |
| 1068 | SLC2A1    | 0.655554397 | 0.007423146 | 0.022959455 | 54.5759334  | 27.05487701 | Superficial | SOX2              |
| 1069 | RBMXL1    | 0.655488128 | 0.021001058 | 0.04834985  | 21.07186616 | 8.056498063 | Superficial | SOX2              |
| 1070 | ARHGFE3   | 0.655422067 | 0.005105016 | 0.018023407 | 22.4596444  | 8.620999995 | Superficial | SOX2              |
| 1071 | TPP2      | 0.654015025 | 0.004211401 | 0.016013117 | 29.24394806 | 12.0423832  | Superficial | SOX2              |
| 1072 | AKAP11    | 0.653966626 | 0.017811616 | 0.043066688 | 21.36105886 | 7.919796639 | Superficial | SOX2              |
| 1073 | MYO6      | 0.653027843 | 0.001526458 | 0.016792744 | 43.91930761 | 23.10721262 | Basal       | SOX2              |
| 1074 | PHF6      | 0.652696533 | 0.005105016 | 0.018023407 | 25.04223587 | 10.11666217 | Superficial | SOX2              |
| 1075 | MAFK      | 0.650414578 | 0.010644787 | 0.044687249 | 14.57536945 | 6.225943242 | Basal       | SOX2              |
| 1076 | LLGL2     | 0.649878814 | 0.000401828 | 0.012455402 | 35.39044093 | 19.03596924 | Basal       | SOX2              |
| 1077 | ZNF146    | 0.649786015 | 0.021001058 | 0.04834985  | 16.61304701 | 5.79814609  | Superficial | SOX2              |
| 1078 | SLC9A3R1  | 0.649284456 | 0.000317696 | 0.012455402 | 70.56397011 | 47.30720979 | Basal       | SOX2              |
| 1079 | COPB1     | 0.649171708 | 0.000635975 | 0.007274975 | 59.26939583 | 29.49107963 | Superficial | SOX2              |
| 1080 | CXC5      | 0.649012341 | 0.000635975 | 0.012925379 | 21.53093653 | 10.79801587 | Basal       | SOX2              |
| 1081 | NFIA      | 0.64874555  | 0.002836074 | 0.012662188 | 53.7574233  | 26.49796931 | Superficial | SOX2              |
| 1082 | SNAI2     | 0.648425085 | 0.015054848 | 0.048140298 | 12.43176037 | 6.318331755 | Suprabasal  | SOX2              |
| 1083 | PIP4K2C   | 0.648192568 | 0.000401828 | 0.012455402 | 18.10247521 | 8.037186698 | Basal       | SOX2              |
| 1084 | ILVBL     | 0.648089774 | 0.021001058 | 0.04834985  | 48.24008432 | 20.18812239 | Superficial | SOX2 + KLF5, SOX2 |
| 1085 | PRKD2     | 0.647914132 | 0.000992312 | 0.014320968 | 23.08315078 | 10.53299073 | Basal       | SOX2              |
| 1086 | GRHL1     | 0.647828984 | 0.002315114 | 0.020052792 | 17.11618921 | 8.766363269 | Basal       | SOX2              |
| 1087 | CTR9      | 0.647808145 | 0.001883197 | 0.010234018 | 46.14068978 | 21.288081   | Superficial | SOX2              |
| 1088 | MRPS5     | 0.647420793 | 0.000795824 | 0.007615337 | 49.35732999 | 23.18354163 | Superficial | SOX2              |
| 1089 | GCH1      | 0.647126938 | 0.002836074 | 0.022562695 | 14.58129743 | 6.129531195 | Basal       | SOX2              |
| 1090 | DNAJC2    | 0.646987291 | 0.021001058 | 0.04834985  | 25.67749226 | 9.788446426 | Superficial | SOX2              |
| 1091 | CTRC2     | 0.646003988 | 0.004211401 | 0.027185186 | 14.0923151  | 5.928055588 | Basal       | SOX2              |
| 1092 | BCL7C     | 0.64482131  | 0.007423146 | 0.022959455 | 43.10442673 | 18.3022768  | Superficial | SOX2              |
| 1093 | KLF16     | 0.644492518 | 0.010644787 | 0.044687249 | 26.12696008 | 12.3925702  | Basal       | SOX2              |

|               |             |             |             |             |             |             |                   |
|---------------|-------------|-------------|-------------|-------------|-------------|-------------|-------------------|
| 1094 RWDD1    | 0.644476403 | 0.000153669 | 0.007176147 | 73.7233654  | 44.41614732 | Superficial | SOX2              |
| 1095 REXO1    | 0.644393123 | 0.000506425 | 0.010489143 | 21.29491628 | 11.63250148 | Suprabasal  | SOX2              |
| 1096 ALKBH6   | 0.643264176 | 0.015054848 | 0.038009884 | 8.987903727 | 4.148990879 | Superficial | SOX2              |
| 1097 TP53BP2  | 0.642931517 | 0.004211401 | 0.027185186 | 27.76129219 | 12.84269071 | Basal       | SOX2              |
| 1098 ETV6     | 0.642798297 | 0.001883197 | 0.014679007 | 37.04574122 | 20.39227825 | Suprabasal  | SOX2              |
| 1099 RPAIN    | 0.640544324 | 0.002836074 | 0.012662188 | 38.56017222 | 15.87384888 | Superficial | SOX2              |
| 1100 NPLOC4   | 0.638617174 | 0.000635975 | 0.012925379 | 29.33666899 | 14.58457346 | Basal       | SOX2              |
| 1101 CLN6     | 0.636965297 | 0.010644787 | 0.038255467 | 17.08599633 | 8.317263013 | Suprabasal  | SOX2              |
| 1102 GDAP1    | 0.635852454 | 0.007423146 | 0.030449933 | 10.90194566 | 5.623306424 | Suprabasal  | SOX2              |
| 1103 SEC23IP  | 0.634659651 | 0.007423146 | 0.022959455 | 22.1392895  | 8.593233906 | Superficial | SOX2              |
| 1104 CDR2     | 0.634532008 | 0.001883197 | 0.018415354 | 10.22859731 | 4.830933407 | Basal       | SOX2              |
| 1105 B3GNT5   | 0.634212695 | 0.010644787 | 0.029507311 | 51.9158176  | 27.30802555 | Superficial | SOX2              |
| 1106 SPPL2A   | 0.633852245 | 0.004211401 | 0.016013117 | 43.33985558 | 18.32567339 | Superficial | SOX2              |
| 1107 GSK3B    | 0.633816567 | 0.000506425 | 0.007178523 | 40.39832657 | 17.8837765  | Superficial | SOX2              |
| 1108 PUS7L    | 0.633488025 | 0.002836074 | 0.012662188 | 29.01936478 | 12.46560073 | Superficial | SOX2              |
| 1109 LINS1    | 0.631907647 | 0.004211401 | 0.016013117 | 16.64845294 | 5.985100765 | Superficial | SOX2              |
| 1110 APPL2    | 0.631652725 | 0.008904627 | 0.034252903 | 42.9805544  | 24.81626319 | Suprabasal  | SOX2              |
| 1111 TACSTD2  | 0.631602355 | 0.000795824 | 0.0136425   | 98.55844464 | 89.75262691 | Basal       | SOX2, KLF5        |
| 1112 RALB     | 0.631027731 | 0.001526458 | 0.009387421 | 66.92308937 | 38.04879059 | Superficial | SOX2              |
| 1113 NUS1     | 0.630748992 | 0.001526458 | 0.009387421 | 26.18152527 | 10.93146073 | Superficial | SOX2              |
| 1114 PLEKHG6  | 0.630732547 | 0.010644787 | 0.044687249 | 10.86442646 | 4.748218178 | Basal       | SOX2              |
| 1115 CTDP1    | 0.630691088 | 0.001883197 | 0.018415354 | 12.37768396 | 5.680913332 | Basal       | SOX2              |
| 1116 HECF1    | 0.62946212  | 0.010644787 | 0.038255467 | 25.31814262 | 13.62847611 | Suprabasal  | SOX2              |
| 1117 TPBG     | 0.628615415 | 0.008904627 | 0.025990329 | 12.37015338 | 4.658716986 | Superficial | SOX2              |
| 1118 PSMD12   | 0.628161006 | 0.001883197 | 0.010234018 | 60.76021059 | 32.83275084 | Superficial | SOX2              |
| 1119 VPS53    | 0.627854593 | 0.005105016 | 0.018023407 | 31.16917285 | 11.9110685  | Superficial | SOX2              |
| 1120 PHRF1    | 0.627348754 | 0.000635975 | 0.010733065 | 28.08723807 | 15.10110419 | Suprabasal  | SOX2              |
| 1121 WDFY2    | 0.627045805 | 0.001232925 | 0.008679903 | 37.26846613 | 15.89920156 | Superficial | SOX2              |
| 1122 DDX54    | 0.626076966 | 0.015054848 | 0.038009884 | 27.37361913 | 9.95378725  | Superficial | SOX2              |
| 1123 GNA15    | 0.625857909 | 0.001526458 | 0.016792744 | 34.12656535 | 17.38627815 | Basal       | SOX2              |
| 1124 PACS1    | 0.624993882 | 0.000635975 | 0.012925379 | 32.06671086 | 15.46331705 | Basal       | SOX2 + KLF5       |
| 1125 KIFAP3   | 0.624614681 | 0.010644787 | 0.029507311 | 24.60834527 | 9.675495534 | Superficial | SOX2              |
| 1126 TMBIM1   | 0.624550933 | 0.001883197 | 0.018415354 | 47.7802457  | 26.01769816 | Basal       | SOX2              |
| 1127 RPAP3    | 0.62447027  | 0.021001058 | 0.04834985  | 22.6548561  | 8.653170341 | Superficial | SOX2              |
| 1128 PKIA     | 0.624035874 | 0.003462059 | 0.019729589 | 17.9108499  | 9.009216803 | Suprabasal  | SOX2              |
| 1129 TTL4     | 0.622221452 | 0.010644787 | 0.038255467 | 6.490223942 | 3.11242573  | Suprabasal  | SOX2              |
| 1130 TMEM51   | 0.621004095 | 0.000506425 | 0.012898798 | 13.93565344 | 6.630753718 | Basal       | SOX2              |
| 1131 CAPN15   | 0.620456443 | 0.008904627 | 0.040392504 | 15.5871956  | 6.756952252 | Basal       | SOX2              |
| 1132 TTC39C   | 0.619828384 | 0.017811616 | 0.043066688 | 15.32945915 | 7.118245549 | Superficial | SOX2 + KLF5       |
| 1133 LMNB1    | 0.619073998 | 0.001526458 | 0.016792744 | 46.9676545  | 27.82506765 | Basal       | SOX2              |
| 1134 NDST1    | 0.618998721 | 0.001232925 | 0.015721789 | 16.85826686 | 7.854229583 | Basal       | SOX2              |
| 1135 HS6ST1   | 0.618991894 | 0.002315114 | 0.016074975 | 26.59241943 | 14.78961537 | Suprabasal  | SOX2 + KLF5, SOX2 |
| 1136 NSD2     | 0.618825078 | 0.002836074 | 0.022562695 | 34.05755097 | 18.57604866 | Basal       | SOX2              |
| 1137 NDUFA4   | 0.617621009 | 0.007423146 | 0.022959455 | 87.20515658 | 75.61760295 | Superficial | SOX2 + KLF5       |
| 1138 TTL      | 0.616625565 | 0.015054848 | 0.038009884 | 9.39597726  | 3.866933503 | Superficial | SOX2              |
| 1139 SCAF1    | 0.616556744 | 0.000401828 | 0.012455402 | 26.69961579 | 12.46298288 | Basal       | SOX2              |
| 1140 LMNA     | 0.616183225 | 0.002315114 | 0.011381143 | 80.38720529 | 57.80369745 | Superficial | SOX2, SOX2 + KLF5 |
| 1141 PARL     | 0.615975765 | 0.006166656 | 0.020290909 | 34.42614282 | 14.25106949 | Superficial | SOX2              |
| 1142 CBX4     | 0.614355706 | 0.006166656 | 0.032981404 | 24.91951176 | 12.4972595  | Basal       | SOX2              |
| 1143 BRWD3    | 0.613658138 | 0.008904627 | 0.025990329 | 34.96651289 | 13.44089262 | Superficial | SOX2              |
| 1144 RIN2     | 0.613619312 | 0.003462059 | 0.019729589 | 48.89795167 | 27.70980442 | Suprabasal  | SOX2 + KLF5       |
| 1145 AXIN1    | 0.613476955 | 9.30E-05    | 0.010489143 | 14.62137054 | 7.716630072 | Suprabasal  | SOX2              |
| 1146 JUN      | 0.612848095 | 0.010644787 | 0.029507311 | 77.53502385 | 50.74961947 | Superficial | SOX2, SOX2 + KLF5 |
| 1147 MTOR     | 0.612490458 | 0.000119764 | 0.012455402 | 22.77006362 | 11.23841573 | Basal       | SOX2              |
| 1148 PTK7     | 0.612100471 | 0.007423146 | 0.030449933 | 17.046313   | 8.949674957 | Suprabasal  | SOX2              |
| 1149 HNRNPU   | 0.611217861 | 0.005105016 | 0.018023407 | 71.0978732  | 39.92723052 | Superficial | SOX2              |
| 1150 ZBTB7A   | 0.611118396 | 0.000635975 | 0.012925379 | 72.61060878 | 45.60543903 | Basal       | SOX2              |
| 1151 LMNB2    | 0.609316573 | 0.001526458 | 0.016792744 | 41.27761467 | 23.83188838 | Basal       | SOX2              |
| 1152 STAM     | 0.608060929 | 0.015054848 | 0.038009884 | 33.32040064 | 13.39469361 | Superficial | SOX2              |
| 1153 PSPC1    | 0.607965342 | 0.006166656 | 0.020290909 | 26.2929197  | 9.608926425 | Superficial | SOX2              |
| 1154 UBA2     | 0.607402761 | 0.004211401 | 0.016013117 | 38.70500567 | 16.10997115 | Superficial | SOX2              |
| 1155 REEP5    | 0.606826435 | 0.001232925 | 0.008679903 | 66.34652048 | 37.75642278 | Superficial | SOX2              |
| 1156 ST3GAL1  | 0.606535423 | 0.017811616 | 0.043066688 | 24.29650378 | 9.987123775 | Superficial | SOX2              |
| 1157 USP47    | 0.60533587  | 0.002836074 | 0.012662188 | 45.99539819 | 18.77180015 | Superficial | SOX2              |
| 1158 DICER1   | 0.605163275 | 0.007423146 | 0.022959455 | 54.5955466  | 26.41130541 | Superficial | SOX2              |
| 1159 STIL     | 0.605032204 | 0.012681065 | 0.049425568 | 17.41909562 | 9.114647452 | Basal       | SOX2              |
| 1160 MEX3C    | 0.604743821 | 0.002836074 | 0.0176927   | 19.5438782  | 10.34685587 | Suprabasal  | SOX2              |
| 1161 EBNA1BP2 | 0.604051292 | 0.008904627 | 0.025990329 | 40.02189028 | 17.49491332 | Superficial | SOX2              |
| 1162 PKMYT1   | 0.603866657 | 0.005105016 | 0.029792864 | 26.85050168 | 15.06546933 | Basal       | SOX2              |
| 1163 DNTTIP2  | 0.60369074  | 0.007423146 | 0.022959455 | 38.13670698 | 15.82482952 | Superficial | SOX2              |
| 1164 RABEP1   | 0.603633062 | 0.002315114 | 0.011381143 | 24.08573739 | 9.127485293 | Superficial | SOX2              |
| 1165 PSMB2    | 0.603597338 | 0.007423146 | 0.022959455 | 59.36204562 | 29.71514402 | Superficial | SOX2              |
| 1166 ATP11A   | 0.602712245 | 0.007423146 | 0.036548425 | 16.71750869 | 7.367259194 | Basal       | SOX2              |

|                |             |             |             |             |             |             |                   |
|----------------|-------------|-------------|-------------|-------------|-------------|-------------|-------------------|
| 1167 HSD17B1   | 0.602155405 | 0.004211401 | 0.016013117 | 24.56695092 | 11.3566743  | Superficial | SOX2              |
| 1168 DDX1      | 0.601574847 | 0.008904627 | 0.025990329 | 44.5230924  | 18.97647767 | Superficial | SOX2              |
| 1169 CCDC43    | 0.601502898 | 0.012681065 | 0.033478436 | 28.05317601 | 11.88733009 | Superficial | SOX2              |
| 1170 F11R      | 0.601020271 | 0.001526458 | 0.016792744 | 63.0512991  | 36.17533407 | Basal       | SOX2              |
| 1171 RRM2      | 0.600475257 | 0.010644787 | 0.044687249 | 39.28345524 | 25.80666442 | Basal       | SOX2              |
| 1172 ZNF367    | 0.600262693 | 0.000317696 | 0.012455402 | 15.13660037 | 7.800981888 | Basal       | SOX2              |
| 1173 IMP3      | 0.60004906  | 0.006166656 | 0.020290909 | 64.98953505 | 33.25115252 | Superficial | SOX2              |
| 1174 FUT2      | 0.599158969 | 0.010644787 | 0.044687249 | 11.62944402 | 5.532194569 | Basal       | SOX2              |
| 1175 DAAM1     | 0.59915439  | 0.000992312 | 0.008042817 | 76.38738117 | 49.14984258 | Superficial | SOX2              |
| 1176 SYPL1     | 0.598514626 | 0.008904627 | 0.025990329 | 76.69146901 | 50.8731247  | Superficial | SOX2              |
| 1177 PDIA6     | 0.598308542 | 0.021001058 | 0.04834985  | 67.6873498  | 34.83698894 | Superficial | SOX2              |
| 1178 FRMD8     | 0.598257819 | 0.003462059 | 0.024854712 | 21.81927065 | 10.05410138 | Basal       | SOX2              |
| 1179 ZNF286A   | 0.598000696 | 0.002315114 | 0.016074975 | 10.4340277  | 5.156451451 | Suprabasal  | SOX2              |
| 1180 DDX5      | 0.596734835 | 0.002315114 | 0.011381143 | 80.40466764 | 53.89941309 | Superficial | SOX2              |
| 1181 BRD3      | 0.596508411 | 0.001883197 | 0.014679007 | 26.70160161 | 14.51964849 | Suprabasal  | SOX2              |
| 1182 BACE2     | 0.594567261 | 0.005105016 | 0.029792864 | 44.63772598 | 24.73032218 | Basal       | SOX2 + KLF5       |
| 1183 TNIP1     | 0.594212161 | 0.000635975 | 0.012925379 | 39.40134427 | 20.60852556 | Basal       | SOX2 + KLF5       |
| 1184 PALB2     | 0.593794395 | 0.002836074 | 0.0176927   | 16.12236284 | 8.209849083 | Suprabasal  | SOX2              |
| 1185 LHL2      | 0.592070357 | 0.000795824 | 0.0136425   | 12.37145745 | 5.614726525 | Basal       | SOX2              |
| 1186 KMT5A     | 0.59128364  | 0.006166656 | 0.020290909 | 65.0270615  | 35.7780276  | Superficial | SOX2              |
| 1187 FBXO45    | 0.588969119 | 0.017811616 | 0.043066688 | 19.16361532 | 8.241544775 | Superficial | SOX2              |
| 1188 S100PBP   | 0.588772465 | 0.003462059 | 0.019729589 | 15.51095779 | 7.592054591 | Suprabasal  | SOX2              |
| 1189 DDB1      | 0.588606432 | 0.021001058 | 0.04834985  | 36.33819273 | 15.45625643 | Superficial | SOX2              |
| 1190 CCDC25    | 0.587148492 | 0.021001058 | 0.04834985  | 47.68870804 | 21.05364584 | Superficial | SOX2              |
| 1191 DGKZ      | 0.587067796 | 0.002836074 | 0.0176927   | 30.55586994 | 17.20076353 | Suprabasal  | SOX2              |
| 1192 KLF6      | 0.586976239 | 0.001526458 | 0.009387421 | 83.35824169 | 60.69685533 | Superficial | SOX2              |
| 1193 CEPBD     | 0.585393294 | 0.004211401 | 0.021879278 | 85.52303744 | 65.28861982 | Suprabasal  | SOX2              |
| 1194 ANKRD9    | 0.584905296 | 0.005105016 | 0.029792864 | 35.83613769 | 18.98583165 | Basal       | SOX2              |
| 1195 SPAST     | 0.584604471 | 0.017811616 | 0.043066688 | 24.12051452 | 10.02080618 | Superficial | SOX2              |
| 1196 NT5C3B    | 0.584186592 | 0.021001058 | 0.04834985  | 18.38476757 | 7.533026674 | Superficial | SOX2              |
| 1197 CDC123    | 0.583905789 | 0.010644787 | 0.029507311 | 42.59845803 | 18.30831463 | Superficial | SOX2              |
| 1198 ADAM10    | 0.583902874 | 0.012681065 | 0.049425568 | 46.92135914 | 25.26441665 | Basal       | SOX2              |
| 1199 TBCB      | 0.583533491 | 0.005105016 | 0.018023407 | 57.99479646 | 30.40976353 | Superficial | SOX2              |
| 1200 TTC9      | 0.583380961 | 0.012681065 | 0.049425568 | 20.57073371 | 10.38099781 | Basal       | SOX2              |
| 1201 HMCES     | 0.583210817 | 0.002836074 | 0.012662188 | 35.52203737 | 16.2197152  | Superficial | SOX2              |
| 1202 PEX11B    | 0.583019182 | 0.015054848 | 0.038009884 | 23.01143191 | 9.454768488 | Superficial | SOX2              |
| 1203 RABGAP1   | 0.582347637 | 0.012681065 | 0.033478436 | 52.92135628 | 25.18508645 | Superficial | SOX2              |
| 1204 PAIP2B    | 0.580739387 | 0.021001058 | 0.04834985  | 44.41576247 | 20.3766825  | Superficial | SOX2 + KLF5, SOX2 |
| 1205 CHD2      | 0.580357251 | 0.000795824 | 0.010838271 | 54.26481291 | 33.87147191 | Suprabasal  | SOX2              |
| 1206 MYO1C     | 0.579266015 | 0.004211401 | 0.027185186 | 50.3517943  | 28.31410955 | Basal       | SOX2              |
| 1207 ACOT7     | 0.579261072 | 0.017811616 | 0.043066688 | 21.06320546 | 8.444328094 | Superficial | SOX2              |
| 1208 ORC1      | 0.578777928 | 0.006166656 | 0.032981404 | 13.08983666 | 6.574679554 | Basal       | SOX2              |
| 1209 GNL3L     | 0.577846754 | 0.012681065 | 0.042921737 | 27.7323956  | 15.59629515 | Suprabasal  | SOX2              |
| 1210 MICALL2   | 0.577590978 | 0.000795824 | 0.0136425   | 24.54449984 | 12.34438818 | Basal       | SOX2              |
| 1211 CDC5L     | 0.577367904 | 0.010644787 | 0.029507311 | 46.85050398 | 20.28831503 | Superficial | SOX2              |
| 1212 ZNF503    | 0.575857212 | 0.010644787 | 0.029507311 | 27.20047124 | 12.22366228 | Superficial | SOX2              |
| 1213 MYOSB     | 0.575610396 | 0.001883197 | 0.018415354 | 12.41517352 | 5.794956349 | Basal       | SOX2              |
| 1214 SHPK      | 0.574491073 | 0.008904627 | 0.025990329 | 9.471988201 | 3.753573693 | Superficial | SOX2              |
| 1215 BW2       | 0.57447235  | 0.017811616 | 0.043066688 | 40.84455152 | 16.52980784 | Superficial | SOX2              |
| 1216 SPPL3     | 0.573634654 | 0.003462059 | 0.014108599 | 47.28374064 | 22.03450031 | Superficial | SOX2 + KLF5, SOX2 |
| 1217 CUL3      | 0.573016092 | 0.000401828 | 0.012455402 | 59.14956542 | 35.1104698  | Basal       | SOX2              |
| 1218 RTN4R     | 0.573006335 | 0.010644787 | 0.044687249 | 10.07206455 | 4.963485412 | Basal       | SOX2              |
| 1219 KATNA1    | 0.572676717 | 0.000250281 | 0.007176147 | 25.18839815 | 11.23271671 | Superficial | SOX2              |
| 1220 CHFR      | 0.572376262 | 0.005105016 | 0.029792864 | 15.92621312 | 7.523139889 | Basal       | SOX2              |
| 1221 ABCB10    | 0.571942293 | 0.004211401 | 0.027185186 | 15.32551643 | 7.592237018 | Basal       | SOX2              |
| 1222 TSTD2     | 0.571866552 | 0.017811616 | 0.043066688 | 10.47451837 | 4.636528888 | Superficial | SOX2              |
| 1223 STK11     | 0.570912857 | 0.004211401 | 0.027185186 | 39.54364401 | 21.58271748 | Basal       | SOX2              |
| 1224 CNOT6     | 0.570895163 | 0.010644787 | 0.029507311 | 27.29005571 | 10.21974886 | Superficial | SOX2              |
| 1225 SMARCC1   | 0.570863674 | 0.010644787 | 0.029507311 | 41.37989477 | 19.06307239 | Superficial | SOX2              |
| 1226 STRBP     | 0.570780625 | 0.002315114 | 0.011381143 | 59.67198685 | 30.93992246 | Superficial | SOX2              |
| 1227 ATXN7L3   | 0.569461391 | 0.000635975 | 0.012925379 | 22.89580349 | 10.95539312 | Basal       | SOX2              |
| 1228 MAP3K1    | 0.569441306 | 0.015054848 | 0.038009884 | 45.13891115 | 19.58848491 | Superficial | SOX2              |
| 1229 KLF10     | 0.568633025 | 0.008904627 | 0.034252903 | 36.85873202 | 21.70693085 | Suprabasal  | SOX2              |
| 1230 MYLIP     | 0.568414442 | 0.001232925 | 0.012246384 | 41.7823653  | 24.48742287 | Suprabasal  | SOX2              |
| 1231 PDXK      | 0.567977931 | 0.000992312 | 0.014320968 | 57.7535651  | 33.79410889 | Basal       | SOX2              |
| 1232 ZMYM1     | 0.56738358  | 0.000506425 | 0.010489143 | 25.27509558 | 13.49142163 | Suprabasal  | SOX2              |
| 1233 UBLCP1    | 0.566918222 | 0.004211401 | 0.016013117 | 39.65019314 | 17.19327528 | Superficial | SOX2              |
| 1234 MYBBP1A   | 0.56688332  | 0.003462059 | 0.024854712 | 22.06185652 | 10.56027538 | Basal       | SOX2              |
| 1235 FBRSL1    | 0.566139832 | 0.003462059 | 0.024854712 | 23.29403516 | 10.99696911 | Basal       | SOX2              |
| 1236 OPA1      | 0.565910951 | 0.015054848 | 0.038009884 | 40.1444524  | 16.26258589 | Superficial | SOX2              |
| 1237 MCM4      | 0.565800435 | 0.003462059 | 0.024854712 | 57.40336068 | 35.47954179 | Basal       | SOX2              |
| 1238 PLAGL2    | 0.565398167 | 0.008904627 | 0.040392504 | 19.64283433 | 9.125336889 | Basal       | SOX2              |
| 1239 TNFAIP8L1 | 0.564537093 | 0.007423146 | 0.036548425 | 18.10017498 | 10.5457503  | Basal       | SOX2              |



|               |             |             |             |             |             |             |                         |
|---------------|-------------|-------------|-------------|-------------|-------------|-------------|-------------------------|
| 1240 LARS2    | 0.563555094 | 0.006166656 | 0.032981404 | 12.02626978 | 5.845680963 | Basal       | SOX2                    |
| 1241 ALYREF   | 0.563301502 | 0.021001058 | 0.04834985  | 41.48176973 | 18.83980691 | Superficial | SOX2                    |
| 1242 LRP10    | 0.563132611 | 0.000153669 | 0.012455402 | 60.99423501 | 37.67474411 | Basal       | SOX2                    |
| 1243 SLC12A2  | 0.562474231 | 0.003462059 | 0.019729589 | 10.77812199 | 5.408597712 | Suprabasal  | SOX2                    |
| 1244 DDR1     | 0.562373943 | 0.000795824 | 0.010838271 | 68.0993919  | 45.28934753 | Suprabasal  | SOX2                    |
| 1245 CNOT3    | 0.561689481 | 0.000992312 | 0.01142308  | 28.71801011 | 17.27564704 | Suprabasal  | SOX2                    |
| 1246 NUP188   | 0.561464204 | 0.002836074 | 0.022562695 | 30.2577921  | 15.1332891  | Basal       | SOX2                    |
| 1247 RGP1     | 0.560435385 | 0.003462059 | 0.019729589 | 13.42346619 | 7.532436965 | Suprabasal  | SOX2                    |
| 1248 ZNF768   | 0.559358288 | 0.001883197 | 0.014679007 | 12.46714038 | 6.490597492 | Suprabasal  | SOX2                    |
| 1249 INTS1    | 0.55918513  | 0.006166656 | 0.032981404 | 30.31020082 | 16.19867459 | Basal       | SOX2                    |
| 1250 BAP1     | 0.558420415 | 0.015054848 | 0.048140298 | 30.97902085 | 18.53894319 | Suprabasal  | SOX2                    |
| 1251 USP25    | 0.557295031 | 0.000196466 | 0.012455402 | 29.0726618  | 14.66598057 | Basal       | SOX2                    |
| 1252 GUF1     | 0.5567566   | 0.007423146 | 0.022959455 | 23.83669527 | 8.827857569 | Superficial | SOX2                    |
| 1253 FAF2     | 0.556593152 | 0.001526458 | 0.009387421 | 36.29272897 | 14.54763219 | Superficial | SOX2                    |
| 1254 EGF6     | 0.556147345 | 0.006166656 | 0.027303057 | 33.72800327 | 18.89160666 | Suprabasal  | SOX2                    |
| 1255 ATP13A2  | 0.555814137 | 0.000401828 | 0.012455402 | 17.53077521 | 9.000378518 | Basal       | SOX2                    |
| 1256 RAB27B   | 0.555355604 | 0.002315114 | 0.011381143 | 59.79240219 | 31.73912783 | Superficial | SOX2, SOX2 + KLF5       |
| 1257 XPO5     | 0.554728734 | 0.015054848 | 0.038009884 | 12.41895402 | 4.453709417 | Superficial | SOX2                    |
| 1258 TARBP1   | 0.553824775 | 0.003462059 | 0.019729589 | 19.92559264 | 11.6501114  | Suprabasal  | SOX2                    |
| 1259 RRP12    | 0.553439503 | 0.001232925 | 0.015721789 | 12.13356295 | 5.922857206 | Basal       | SOX2 + KLF5, SOX2       |
| 1260 MCM2     | 0.553145931 | 0.008904627 | 0.040392504 | 26.87734726 | 14.5281405  | Basal       | SOX2                    |
| 1261 TES      | 0.551859738 | 0.006166656 | 0.020290909 | 40.8340672  | 18.31834669 | Superficial | SOX2                    |
| 1262 SLC25A10 | 0.551805139 | 0.010644787 | 0.044687249 | 38.67628151 | 21.72036806 | Basal       | SOX2 + KLF5, SOX2       |
| 1263 TMEM33   | 0.550352753 | 0.003462059 | 0.014108599 | 43.15784579 | 21.71450811 | Superficial | SOX2                    |
| 1264 ECD      | 0.549038951 | 0.017811616 | 0.043066688 | 19.31874557 | 9.430919656 | Superficial | SOX2                    |
| 1265 TBCD     | 0.548662953 | 0.003462059 | 0.024854712 | 27.13218841 | 14.47561619 | Basal       | SOX2                    |
| 1266 JUP      | 0.54864085  | 0.000795824 | 0.0136425   | 86.39745245 | 66.15826609 | Basal       | SOX2, SOX2 + KLF5       |
| 1267 FAM102A  | 0.547362144 | 0.000635975 | 0.012925379 | 31.91566041 | 16.70012751 | Basal       | SOX2                    |
| 1268 TRIP12   | 0.545203053 | 0.007423146 | 0.036548425 | 49.7497347  | 27.85387132 | Basal       | SOX2                    |
| 1269 ATP6V0A2 | 0.544362438 | 0.015054848 | 0.048140298 | 13.39822462 | 7.244591033 | Suprabasal  | SOX2                    |
| 1270 SYTL1    | 0.544315471 | 0.021001058 | 0.04834985  | 73.97048156 | 45.83813186 | Superficial | SOX2                    |
| 1271 HNRNPM   | 0.543720788 | 0.012681065 | 0.033478436 | 63.11040245 | 32.54516521 | Superficial | SOX2                    |
| 1272 ELF3     | 0.54136574  | 0.012681065 | 0.049425568 | 56.54352937 | 38.3781648  | Basal       | SOX2, KLF5, SOX2 + KLF5 |
| 1273 ERBB3    | 0.541330501 | 0.000795824 | 0.0136425   | 42.43033253 | 24.05521405 | Basal       | SOX2                    |
| 1274 KLC2     | 0.54054988  | 0.004211401 | 0.021879278 | 11.36024429 | 6.507917261 | Suprabasal  | SOX2                    |
| 1275 CBFβ     | 0.539190443 | 0.001526458 | 0.016792744 | 30.44720682 | 14.98475264 | Basal       | SOX2                    |
| 1276 MICALL1  | 0.53903016  | 0.001526458 | 0.016792744 | 26.62948582 | 13.60714347 | Basal       | SOX2                    |
| 1277 ATP13A3  | 0.538620588 | 0.006166656 | 0.032981404 | 33.65402979 | 16.85817377 | Basal       | SOX2                    |
| 1278 BMP2K    | 0.5381026   | 0.010644787 | 0.029507311 | 30.86873589 | 12.87664539 | Superficial | SOX2                    |
| 1279 IRAK1    | 0.538095381 | 0.002315114 | 0.020052792 | 38.96317903 | 21.4747565  | Basal       | SOX2                    |
| 1280 TM7SF3   | 0.537123275 | 0.003462059 | 0.014108599 | 39.04521885 | 18.4880171  | Superficial | SOX2                    |
| 1281 PSMB3    | 0.535779065 | 0.002315114 | 0.011381143 | 73.69962452 | 44.93950696 | Superficial | SOX2                    |
| 1282 CRYBG2   | 0.535424694 | 0.003462059 | 0.024854712 | 13.47297953 | 6.898201952 | Basal       | KLF5                    |
| 1283 SOD2     | 0.535167327 | 0.008904627 | 0.040392504 | 74.53929203 | 49.21507383 | Basal       | SOX2                    |
| 1284 SNN      | 0.534874669 | 0.000401828 | 0.012455402 | 12.75407637 | 6.481786994 | Basal       | SOX2                    |
| 1285 CWC27    | 0.534707173 | 0.004211401 | 0.016013117 | 26.12936858 | 11.5878165  | Superficial | SOX2                    |
| 1286 ARSJ     | 0.533709462 | 0.012681065 | 0.042921737 | 7.698190606 | 3.763901651 | Suprabasal  | SOX2                    |
| 1287 NUDT3    | 0.533337388 | 0.012681065 | 0.033478436 | 25.04808303 | 9.578946621 | Superficial | SOX2                    |
| 1288 ANKRD52  | 0.53277344  | 0.004211401 | 0.021879278 | 10.11138008 | 5.40810124  | Suprabasal  | SOX2                    |
| 1289 S100A11  | 0.532661764 | 0.004211401 | 0.027185186 | 99.86119542 | 98.82193269 | Basal       | SOX2                    |
| 1290 CNOT11   | 0.5325964   | 0.002315114 | 0.011381143 | 38.1402724  | 17.44697014 | Superficial | SOX2                    |
| 1291 CUL2     | 0.532346494 | 0.012681065 | 0.033478436 | 31.02835804 | 13.27069577 | Superficial | SOX2                    |
| 1292 EIF2S1   | 0.532152229 | 0.006166656 | 0.020290909 | 47.45304071 | 21.71808627 | Superficial | SOX2                    |
| 1293 ERCC6    | 0.531874264 | 0.002836074 | 0.0176927   | 24.24188941 | 14.03843851 | Suprabasal  | SOX2                    |
| 1294 NKAP     | 0.531109713 | 0.002315114 | 0.011381143 | 36.56583353 | 15.56036051 | Superficial | SOX2                    |
| 1295 ITPKB    | 0.530289527 | 0.004211401 | 0.021879278 | 8.021108444 | 4.822059891 | Suprabasal  | SOX2                    |
| 1296 TGOLN2   | 0.529440537 | 0.006166656 | 0.020290909 | 45.81425303 | 23.33559263 | Superficial | SOX2                    |
| 1297 TRIP10   | 0.527179997 | 0.000795824 | 0.0136425   | 26.74185502 | 13.52408073 | Basal       | SOX2 + KLF5             |
| 1298 WAPL     | 0.527163417 | 0.017811616 | 0.043066688 | 45.72441968 | 20.94921423 | Superficial | SOX2                    |
| 1299 ANLN     | 0.526520833 | 0.008904627 | 0.040392504 | 36.530004   | 22.85027331 | Basal       | SOX2                    |
| 1300 ANXA1    | 0.526354665 | 0.010644787 | 0.044687249 | 99.04728296 | 97.15687469 | Basal       | SOX2 + KLF5, SOX2       |
| 1301 CTNNA1   | 0.525896828 | 0.002315114 | 0.020052792 | 77.18314236 | 53.75795767 | Basal       | SOX2                    |
| 1302 NXN      | 0.52540313  | 0.012681065 | 0.042921737 | 43.88886404 | 24.88549412 | Suprabasal  | SOX2                    |
| 1303 KLHL8    | 0.523147525 | 0.010644787 | 0.038255467 | 15.65540226 | 8.980403041 | Suprabasal  | SOX2 + KLF5             |
| 1304 JAG1     | 0.522042648 | 0.002836074 | 0.022562695 | 60.931408   | 37.7428955  | Basal       | SOX2, SOX2 + KLF5       |
| 1305 CHD7     | 0.521984316 | 0.007423146 | 0.022959455 | 33.38086425 | 14.66102246 | Superficial | SOX2                    |
| 1306 RAD23A   | 0.521616714 | 0.010644787 | 0.029507311 | 49.6591592  | 21.30608421 | Superficial | SOX2                    |
| 1307 ACBD3    | 0.521467682 | 0.001526458 | 0.013290882 | 80.56801461 | 59.80486031 | Suprabasal  | SOX2                    |
| 1308 NUMA1    | 0.521181726 | 0.005105016 | 0.029792864 | 53.1244713  | 30.20781378 | Basal       | SOX2                    |
| 1309 ATRIP    | 0.520900406 | 0.002315114 | 0.020052792 | 14.17842467 | 7.484290553 | Basal       | SOX2                    |
| 1310 NFATC2IP | 0.52049701  | 0.012681065 | 0.033478436 | 26.51865935 | 10.89065796 | Superficial | SOX2                    |
| 1311 GRSF1    | 0.519672061 | 0.000506425 | 0.007178523 | 47.21126079 | 22.01541314 | Superficial | SOX2                    |
| 1312 ARID2    | 0.518042147 | 0.015054848 | 0.038009884 | 26.3492912  | 11.03379219 | Superficial | SOX2                    |

|      |           |             |             |             |             |             |             |                   |
|------|-----------|-------------|-------------|-------------|-------------|-------------|-------------|-------------------|
| 1313 | CUEDC1    | 0.517765462 | 0.002315114 | 0.020052792 | 16.95961156 | 8.258408028 | Basal       | SOX2              |
| 1314 | KLF3      | 0.517679593 | 0.007423146 | 0.030449933 | 83.92570547 | 65.51864617 | Suprabasal  | SOX2 + KLF5       |
| 1315 | MTRF1L    | 0.51714331  | 0.010644787 | 0.029507311 | 27.58706894 | 13.04922908 | Superficial | SOX2              |
| 1316 | ELP4      | 0.516927801 | 0.010644787 | 0.029507311 | 14.78220504 | 6.588135394 | Superficial | SOX2              |
| 1317 | CDC42EP5  | 0.515557091 | 0.008904627 | 0.040392504 | 51.64386602 | 28.76256482 | Basal       | SOX2              |
| 1318 | RFWWD3    | 0.515309713 | 0.004211401 | 0.021879278 | 11.70454255 | 6.736320405 | Suprabasal  | SOX2              |
| 1319 | AQR       | 0.514022203 | 0.015054848 | 0.038009884 | 31.19422048 | 12.82419177 | Superficial | SOX2              |
| 1320 | SDE2      | 0.512741406 | 0.006166656 | 0.027303057 | 23.7675373  | 12.72793341 | Suprabasal  | SOX2              |
| 1321 | PNKP      | 0.511632792 | 0.008904627 | 0.025990329 | 23.42211961 | 10.10092883 | Superficial | SOX2              |
| 1322 | UPF1      | 0.511286401 | 0.003462059 | 0.024854712 | 37.07981162 | 19.42343512 | Basal       | SOX2              |
| 1323 | PTK6      | 0.510135249 | 0.012681065 | 0.049425568 | 19.27144799 | 9.872191405 | Basal       | SOX2              |
| 1324 | USP6NL    | 0.509593969 | 0.008904627 | 0.040392504 | 17.68897498 | 8.50089317  | Basal       | SOX2              |
| 1325 | MP2L1     | 0.508728407 | 0.008904627 | 0.025990329 | 43.3369847  | 22.76864965 | Superficial | SOX2 + KLF5, SOX2 |
| 1326 | BUB3      | 0.508714222 | 0.007423146 | 0.022959455 | 45.69659583 | 21.03149772 | Superficial | SOX2              |
| 1327 | PURA      | 0.507065933 | 0.000401828 | 0.007176147 | 44.46355188 | 21.71574662 | Superficial | SOX2              |
| 1328 | FRS2      | 0.506244634 | 0.021001058 | 0.04834985  | 18.7799487  | 7.366259053 | Superficial | SOX2              |
| 1329 | FRMD6     | 0.505534122 | 0.002315114 | 0.011381143 | 72.31695849 | 41.61355295 | Superficial | SOX2              |
| 1330 | CCND1     | 0.505169811 | 0.021001058 | 0.04834985  | 55.07589057 | 29.22761701 | Superficial | SOX2              |
| 1331 | GNB2      | 0.50420714  | 0.005105016 | 0.029792864 | 78.3157134  | 55.61594237 | Basal       | SOX2              |
| 1332 | SH2B1     | 0.503568083 | 0.015054848 | 0.048140298 | 17.07369447 | 9.923961829 | Suprabasal  | SOX2              |
| 1333 | ASPH      | 0.501403718 | 0.004211401 | 0.021879278 | 70.82171402 | 48.84771551 | Suprabasal  | SOX2              |
| 1334 | PPP6R1    | 0.5009654   | 0.001232925 | 0.015721789 | 29.47347937 | 15.12279427 | Basal       | SOX2              |
| 1335 | NAPG      | 0.499670728 | 0.003462059 | 0.014108599 | 57.91755322 | 29.49803192 | Superficial | SOX2              |
| 1336 | MNAT1     | 0.499035232 | 0.001526458 | 0.009387421 | 33.82642552 | 15.08818925 | Superficial | SOX2              |
| 1337 | HNRNPA2B1 | 0.497371459 | 0.015054848 | 0.038009884 | 74.51684124 | 46.06121545 | Superficial | SOX2              |
| 1338 | CEP44     | 0.497034882 | 0.021001058 | 0.04834985  | 13.30912046 | 5.031562544 | Superficial | SOX2              |
| 1339 | FAM111A   | 0.496459518 | 0.005105016 | 0.024262694 | 17.72632172 | 10.20689672 | Suprabasal  | SOX2              |
| 1340 | GUCD1     | 0.49643982  | 0.001883197 | 0.018415354 | 31.74971695 | 16.31569375 | Basal       | SOX2              |
| 1341 | CLUAP1    | 0.496336728 | 0.008904627 | 0.034252903 | 21.28641366 | 11.54826649 | Suprabasal  | SOX2              |
| 1342 | KCTD3     | 0.494652574 | 0.000992312 | 0.014320968 | 39.57678112 | 21.59878832 | Basal       | SOX2              |
| 1343 | SAP30     | 0.493979071 | 0.007423146 | 0.036548425 | 45.00566094 | 26.41014799 | Basal       | SOX2              |
| 1344 | HNRNPR    | 0.491063799 | 0.017811616 | 0.043066688 | 47.55427304 | 22.21570082 | Superficial | SOX2              |
| 1345 | NRDC      | 0.490991214 | 0.021001058 | 0.04834985  | 55.72038228 | 30.60547076 | Superficial | SOX2              |
| 1346 | TRIM33    | 0.489450207 | 0.017811616 | 0.043066688 | 39.7606089  | 17.51831737 | Superficial | SOX2 + KLF5, SOX2 |
| 1347 | SEC61A1   | 0.488628097 | 0.015054848 | 0.038009884 | 45.15063283 | 22.414793   | Superficial | SOX2              |
| 1348 | WDHD1     | 0.488116912 | 0.001526458 | 0.016792744 | 24.01800884 | 13.26388537 | Basal       | SOX2              |
| 1349 | SPAG9     | 0.48675745  | 0.000795824 | 0.0136425   | 51.34410616 | 30.18405598 | Basal       | SOX2              |
| 1350 | SEC14L2   | 0.486212927 | 0.001883197 | 0.018415354 | 12.00086909 | 5.227538256 | Basal       | SOX2              |
| 1351 | MRPS31    | 0.486202719 | 0.017811616 | 0.043066688 | 38.70154943 | 17.3136704  | Superficial | SOX2              |
| 1352 | BDKRB2    | 0.485062961 | 0.006166656 | 0.032981404 | 17.36183784 | 8.801648887 | Basal       | SOX2              |
| 1353 | SRPK2     | 0.482498645 | 0.003462059 | 0.014108599 | 44.41141015 | 20.7636501  | Superficial | SOX2              |
| 1354 | PSMA1     | 0.482165624 | 0.008904627 | 0.025990329 | 65.97719582 | 36.27990299 | Superficial | SOX2              |
| 1355 | TPGS1     | 0.481782703 | 0.017811616 | 0.043066688 | 41.59724017 | 19.97718233 | Superficial | SOX2              |
| 1356 | CACTIN    | 0.481764839 | 0.010644787 | 0.038255467 | 9.797951605 | 5.480509165 | Suprabasal  | SOX2              |
| 1357 | TTTN      | 0.481760114 | 0.002315114 | 0.020052792 | 68.34703483 | 44.04458385 | Basal       | SOX2              |
| 1358 | ZDHHCS    | 0.481638674 | 0.002836074 | 0.022562695 | 45.41187793 | 26.26191115 | Basal       | SOX2              |
| 1359 | SH3GL1    | 0.481509796 | 0.000317696 | 0.012455402 | 40.9722635  | 22.65329046 | Basal       | SOX2              |
| 1360 | FMR1      | 0.481142069 | 0.005105016 | 0.024262694 | 43.2968248  | 26.86475631 | Suprabasal  | SOX2              |
| 1361 | NADK      | 0.480684707 | 0.010644787 | 0.044687249 | 20.85555924 | 10.89633778 | Basal       | SOX2              |
| 1362 | RALY      | 0.479004374 | 0.017811616 | 0.043066688 | 71.36994745 | 45.26189074 | Superficial | SOX2              |
| 1363 | SPECC1    | 0.478790004 | 0.010644787 | 0.044687249 | 16.64152372 | 8.452011622 | Basal       | SOX2              |
| 1364 | DNAJB14   | 0.47843695  | 0.007423146 | 0.022959455 | 35.23391723 | 15.120162   | Superficial | SOX2              |
| 1365 | TRIM16    | 0.475968725 | 0.006166656 | 0.032981404 | 45.63964355 | 28.50255283 | Basal       | SOX2              |
| 1366 | DVL3      | 0.475846201 | 0.000250281 | 0.010489143 | 34.21125811 | 21.10756577 | Suprabasal  | SOX2              |
| 1367 | ARMC1     | 0.474807714 | 0.008904627 | 0.025990329 | 27.30242392 | 11.60866805 | Superficial | SOX2              |
| 1368 | R3HDM4    | 0.474476837 | 0.000992312 | 0.014320968 | 34.1889281  | 18.11556037 | Basal       | SOX2              |
| 1369 | TWF1      | 0.473939191 | 0.001883197 | 0.018415354 | 57.49152249 | 35.50918611 | Basal       | SOX2              |
| 1370 | DENND2D   | 0.47280977  | 0.000317696 | 0.012455402 | 36.61631128 | 20.5686023  | Basal       | SOX2              |
| 1371 | AHNAK     | 0.472580773 | 0.000992312 | 0.014320968 | 94.70051847 | 83.04168059 | Basal       | SOX2, SOX2 + KLF5 |
| 1372 | SIK3      | 0.471835245 | 0.003462059 | 0.024854712 | 16.02132565 | 7.698144507 | Basal       | SOX2              |
| 1373 | EHD1      | 0.471129417 | 0.006166656 | 0.032981404 | 18.87141849 | 9.712745193 | Basal       | SOX2              |
| 1374 | SCO1      | 0.469811368 | 0.002315114 | 0.011381143 | 27.81739673 | 11.84774497 | Superficial | SOX2              |
| 1375 | RCN1      | 0.469437498 | 0.007423146 | 0.030449933 | 39.25339792 | 22.71572912 | Suprabasal  | SOX2              |
| 1376 | THUMP3D3  | 0.469358263 | 0.021001058 | 0.04834985  | 30.94173887 | 12.9790936  | Superficial | SOX2              |
| 1377 | RYK       | 0.469142284 | 0.002315114 | 0.011381143 | 30.19491679 | 13.27920261 | Superficial | SOX2              |
| 1378 | PHF20L1   | 0.468437348 | 0.007423146 | 0.022959455 | 61.30332804 | 34.85572051 | Superficial | SOX2              |
| 1379 | SHCBP1    | 0.467837807 | 0.005105016 | 0.029792864 | 22.36528606 | 12.86186587 | Basal       | SOX2              |
| 1380 | DENND1A   | 0.467812365 | 0.012681065 | 0.042921737 | 6.96267468  | 4.220814957 | Suprabasal  | SOX2 + KLF5       |
| 1381 | PPM1D     | 0.467316307 | 0.002836074 | 0.022562695 | 13.17120466 | 6.699147999 | Basal       | SOX2              |
| 1382 | ZNF598    | 0.466855393 | 0.002315114 | 0.020052792 | 20.47352294 | 10.30751396 | Basal       | SOX2              |
| 1383 | PGAP2     | 0.466709668 | 0.012681065 | 0.033478436 | 35.43820831 | 16.82219589 | Superficial | SOX2              |
| 1384 | PELP1     | 0.466601935 | 0.005105016 | 0.024262694 | 27.07148126 | 15.08417818 | Suprabasal  | SOX2              |
| 1385 | MAP4K4    | 0.464946588 | 0.002315114 | 0.020052792 | 29.0491676  | 15.70885276 | Basal       | SOX2              |

|               |             |             |             |             |             |             |                   |
|---------------|-------------|-------------|-------------|-------------|-------------|-------------|-------------------|
| 1386 USP22    | 0.463671294 | 0.012681065 | 0.042921737 | 44.5022348  | 27.78089775 | Suprabasal  | SOX2              |
| 1387 MGAT4B   | 0.463578307 | 0.012681065 | 0.033478436 | 63.79064886 | 35.34931688 | Superficial | SOX2              |
| 1388 DUSP16   | 0.463416326 | 0.010644787 | 0.044687249 | 12.4917934  | 5.563776748 | Basal       | SOX2              |
| 1389 FAAP100  | 0.462850974 | 0.003462059 | 0.024854712 | 14.96658424 | 7.878325253 | Basal       | SOX2              |
| 1390 ERICH1   | 0.462223974 | 0.015054848 | 0.038009884 | 25.89510034 | 10.06784504 | Superficial | SOX2              |
| 1391 SLC22A23 | 0.461757582 | 0.006166656 | 0.027303057 | 39.49224725 | 24.87529787 | Suprabasal  | SOX2              |
| 1392 STAM2    | 0.459897509 | 0.002836074 | 0.0176927   | 43.15189679 | 27.25445502 | Suprabasal  | SOX2              |
| 1393 STRN4    | 0.459425666 | 0.000506425 | 0.012898798 | 25.0584803  | 12.69442914 | Basal       | SOX2              |
| 1394 PRKCI    | 0.459071509 | 0.012681065 | 0.042921737 | 51.41691073 | 33.04730749 | Suprabasal  | SOX2              |
| 1395 GATAD2A  | 0.458863107 | 0.003462059 | 0.024854712 | 35.79161866 | 18.9186545  | Basal       | SOX2              |
| 1396 TMEM68   | 0.458247895 | 0.015054848 | 0.038009884 | 16.45128655 | 6.283049534 | Superficial | SOX2              |
| 1397 EIF5B    | 0.45771753  | 0.017811616 | 0.043066688 | 63.11019127 | 36.34802617 | Superficial | SOX2              |
| 1398 NUP98    | 0.457010854 | 0.000992312 | 0.014320968 | 32.6907407  | 17.7336952  | Basal       | SOX2              |
| 1399 DYNC11L2 | 0.456769397 | 0.000635975 | 0.007274975 | 61.99864339 | 35.22299681 | Superficial | SOX2              |
| 1400 CAND1    | 0.454883616 | 0.015054848 | 0.048140298 | 51.67717794 | 32.39796423 | Suprabasal  | SOX2              |
| 1401 SEC16A   | 0.454482179 | 0.010644787 | 0.044687249 | 21.18626829 | 10.61205209 | Basal       | SOX2              |
| 1402 ADAM17   | 0.453611455 | 0.010644787 | 0.029507311 | 30.19171051 | 11.82663939 | Superficial | SOX2              |
| 1403 THUMP2   | 0.45263715  | 0.021001058 | 0.04834985  | 15.97784169 | 6.56066906  | Superficial | SOX2 + KLF5       |
| 1404 ACACA    | 0.452417245 | 0.008904627 | 0.040392504 | 29.6471181  | 15.65104834 | Basal       | SOX2              |
| 1405 PPP2R5E  | 0.452064751 | 0.021001058 | 0.04834985  | 55.92045393 | 30.5051335  | Superficial | SOX2              |
| 1406 SLK      | 0.451135179 | 0.000401828 | 0.012455402 | 60.34261778 | 38.60359737 | Basal       | SOX2              |
| 1407 MOCOS    | 0.450507041 | 0.007423146 | 0.036548425 | 11.66780025 | 6.100869399 | Basal       | SOX2              |
| 1408 TOCF1    | 0.449688868 | 0.001526458 | 0.016792744 | 41.03802722 | 24.1069045  | Basal       | SOX2              |
| 1409 PANX1    | 0.449051913 | 0.012681065 | 0.049425568 | 9.645531418 | 4.874082636 | Basal       | SOX2              |
| 1410 ZFP90    | 0.448202743 | 0.002315114 | 0.016074975 | 15.3130742  | 8.801039518 | Suprabasal  | SOX2              |
| 1411 FBXO46   | 0.447624189 | 0.000992312 | 0.014320968 | 16.59204452 | 8.127326468 | Basal       | SOX2              |
| 1412 STRN     | 0.447432023 | 0.010644787 | 0.044687249 | 38.84829394 | 21.44867213 | Basal       | SOX2              |
| 1413 NOL6     | 0.446672582 | 0.010644787 | 0.044687249 | 13.11910862 | 6.729699791 | Basal       | SOX2              |
| 1414 MDN1     | 0.446383845 | 0.005105016 | 0.029792864 | 24.44692351 | 12.62374257 | Basal       | SOX2              |
| 1415 CNN2     | 0.445861687 | 0.006166656 | 0.032981404 | 56.8142339  | 32.70563775 | Basal       | SOX2              |
| 1416 ADA      | 0.445206613 | 0.005105016 | 0.029792864 | 22.03751847 | 11.78920222 | Basal       | SOX2              |
| 1417 FBR5     | 0.444705702 | 0.012681065 | 0.049425568 | 30.07899109 | 15.75416998 | Basal       | SOX2              |
| 1418 STON2    | 0.443577293 | 0.008904627 | 0.034252903 | 31.50370257 | 18.35266099 | Suprabasal  | SOX2              |
| 1419 ACOX1    | 0.442951284 | 0.004211401 | 0.027185186 | 30.32328526 | 15.83888351 | Basal       | SOX2 + KLF5       |
| 1420 NEDD1    | 0.442012152 | 0.008904627 | 0.034252903 | 14.81115727 | 7.965198757 | Suprabasal  | SOX2              |
| 1421 ARAF     | 0.44188733  | 0.001883197 | 0.018415354 | 23.96647628 | 12.83259466 | Basal       | SOX2              |
| 1422 GTF3C4   | 0.438299723 | 0.010644787 | 0.038255467 | 20.14127445 | 12.16362485 | Suprabasal  | SOX2              |
| 1423 ARMT1    | 0.437711806 | 0.010644787 | 0.029507311 | 27.61166468 | 11.64950814 | Superficial | SOX2              |
| 1424 ZNF513   | 0.437149719 | 0.002836074 | 0.0176927   | 13.08879921 | 8.269687283 | Suprabasal  | SOX2              |
| 1425 GPC1     | 0.4335995   | 0.005105016 | 0.024262694 | 58.84720048 | 40.39056084 | Suprabasal  | SOX2              |
| 1426 PLS1     | 0.433501833 | 0.007423146 | 0.036548425 | 23.59769785 | 12.01671039 | Basal       | SOX2 + KLF5       |
| 1427 TOPBP1   | 0.432977178 | 0.003462059 | 0.019729589 | 26.22138818 | 15.40008064 | Suprabasal  | SOX2              |
| 1428 CTSB     | 0.43282805  | 0.002315114 | 0.020052792 | 79.26851537 | 55.67357313 | Basal       | SOX2              |
| 1429 CRABP2   | 0.432650393 | 0.008904627 | 0.040392504 | 83.33089204 | 72.13197537 | Basal       | SOX2              |
| 1430 RAD54L2  | 0.431128164 | 0.006166656 | 0.027303057 | 13.54171258 | 7.65361492  | Suprabasal  | SOX2              |
| 1431 PCBP4    | 0.430029248 | 0.012681065 | 0.042921737 | 12.17578092 | 7.218205687 | Suprabasal  | SOX2              |
| 1432 SMCHD1   | 0.429808244 | 0.006166656 | 0.027303057 | 37.02295778 | 22.63417127 | Suprabasal  | SOX2              |
| 1433 SNX1     | 0.429491131 | 0.002315114 | 0.016074975 | 63.4365984  | 43.72910637 | Suprabasal  | SOX2              |
| 1434 DHX32    | 0.427564306 | 0.005105016 | 0.029792864 | 29.98898918 | 16.15208417 | Basal       | SOX2              |
| 1435 PTPN9    | 0.426795876 | 0.015054848 | 0.048140298 | 12.96039252 | 7.098054443 | Suprabasal  | SOX2              |
| 1436 SRPRA    | 0.426396935 | 0.002315114 | 0.020052792 | 47.1307841  | 26.94631004 | Basal       | SOX2              |
| 1437 MAPRE3   | 0.426209732 | 0.012681065 | 0.042921737 | 6.598992634 | 3.77396755  | Suprabasal  | SOX2              |
| 1438 STK24    | 0.423981945 | 0.004211401 | 0.027185186 | 66.7561237  | 42.88101471 | Basal       | SOX2              |
| 1439 PPL4     | 0.423935678 | 0.001526458 | 0.009387421 | 33.29502682 | 14.07107106 | Superficial | SOX2              |
| 1440 HDAC2    | 0.423736835 | 0.012681065 | 0.033478436 | 46.77046386 | 22.13070123 | Superficial | SOX2              |
| 1441 DONSON   | 0.422694654 | 0.002315114 | 0.020052792 | 18.01339736 | 10.3784105  | Basal       | SOX2              |
| 1442 ATAD2    | 0.422335996 | 0.007423146 | 0.036548425 | 52.37566144 | 34.75413718 | Basal       | SOX2              |
| 1443 EIF4G3   | 0.421871801 | 0.012681065 | 0.033478436 | 41.23540469 | 19.80500389 | Superficial | SOX2 + KLF5       |
| 1444 KIF1B    | 0.421858334 | 0.001232925 | 0.015721789 | 28.04042735 | 15.11331966 | Basal       | SOX2              |
| 1445 CSNK1G2  | 0.421806566 | 0.001526458 | 0.016792744 | 41.06864299 | 23.48149592 | Basal       | SOX2              |
| 1446 AP1S1    | 0.421228877 | 0.015054848 | 0.038009884 | 48.96038672 | 26.48981535 | Superficial | SOX2              |
| 1447 TAF13    | 0.420823645 | 0.007423146 | 0.036548425 | 21.98425883 | 10.86907487 | Basal       | SOX2              |
| 1448 RPRD1B   | 0.420555262 | 0.004211401 | 0.027185186 | 24.94256673 | 13.10438258 | Basal       | SOX2              |
| 1449 PSME3    | 0.419754849 | 0.003462059 | 0.024854712 | 36.95658387 | 21.39527241 | Basal       | SOX2              |
| 1450 EIF4G2   | 0.419134212 | 0.005105016 | 0.029792864 | 89.21513224 | 71.25553618 | Basal       | SOX2              |
| 1451 ABHD17C  | 0.418557758 | 0.007423146 | 0.036548425 | 29.43653927 | 15.59754586 | Basal       | SOX2              |
| 1452 BAG3     | 0.418424075 | 0.001526458 | 0.016792744 | 57.19094076 | 35.78013283 | Basal       | SOX2              |
| 1453 DCTN1    | 0.418072859 | 0.002315114 | 0.016074975 | 51.97888715 | 35.8322889  | Suprabasal  | SOX2              |
| 1454 SOS1     | 0.416701949 | 0.004211401 | 0.021879278 | 38.80402609 | 24.64701172 | Suprabasal  | SOX2              |
| 1455 PLD1     | 0.416621216 | 0.010644787 | 0.044687249 | 26.55414004 | 14.95657525 | Basal       | SOX2 + KLF5       |
| 1456 CSNK2A2  | 0.416250629 | 0.007423146 | 0.030449933 | 49.98222445 | 31.77717767 | Suprabasal  | SOX2              |
| 1457 SIGMAR1  | 0.415664039 | 0.010644787 | 0.044687249 | 45.53288418 | 27.00160704 | Basal       | SOX2              |
| 1458 BAIAP2L1 | 0.414981604 | 0.000992312 | 0.014320968 | 23.04935728 | 12.37712073 | Basal       | SOX2, SOX2 + KLF5 |

|      |           |             |             |             |             |             |             |                   |
|------|-----------|-------------|-------------|-------------|-------------|-------------|-------------|-------------------|
| 1459 | RRAGD     | 0.411940318 | 0.008904627 | 0.025990329 | 53.16936183 | 28.17200598 | Superficial | SOX2              |
| 1460 | LARP4B    | 0.411512699 | 0.015054848 | 0.048140298 | 44.28576258 | 28.30531636 | Suprabasal  | SOX2              |
| 1461 | RRP1B     | 0.411164292 | 0.000795824 | 0.010838271 | 32.97235215 | 19.66653476 | Suprabasal  | SOX2              |
| 1462 | MAPK1     | 0.410899477 | 0.005105016 | 0.029792864 | 48.74884732 | 28.8759107  | Basal       | SOX2              |
| 1463 | OXSR1     | 0.410887757 | 0.012681065 | 0.049425568 | 31.81485499 | 17.55439172 | Basal       | SOX2              |
| 1464 | PPP4R3A   | 0.409837121 | 0.012681065 | 0.042921737 | 46.70037185 | 29.32635926 | Suprabasal  | SOX2              |
| 1465 | ABR       | 0.40963197  | 0.008904627 | 0.040392504 | 28.23171008 | 14.95736728 | Basal       | SOX2 + KLF5       |
| 1466 | TULP4     | 0.409453896 | 0.000992312 | 0.01142308  | 35.80588971 | 22.82858622 | Suprabasal  | SOX2 + KLF5       |
| 1467 | DARS2     | 0.408800324 | 0.007423146 | 0.036548425 | 16.0927049  | 8.816252156 | Basal       | SOX2              |
| 1468 | TULP3     | 0.40868924  | 0.004211401 | 0.021879278 | 33.2829504  | 21.53384324 | Suprabasal  | SOX2 + KLF5, SOX2 |
| 1469 | RAB6A     | 0.408482401 | 0.012681065 | 0.033478436 | 64.19858162 | 38.33939519 | Superficial | SOX2              |
| 1470 | NF2       | 0.407599037 | 0.000401828 | 0.012455402 | 24.32252414 | 13.08445788 | Basal       | SOX2              |
| 1471 | HNRNPUL1  | 0.404922839 | 0.000795824 | 0.010838271 | 60.58384221 | 41.805875   | Suprabasal  | SOX2              |
| 1472 | UBE3A     | 0.404126921 | 0.008904627 | 0.025990329 | 52.68022712 | 27.47703569 | Superficial | SOX2              |
| 1473 | DNAJC21   | 0.40361818  | 0.000992312 | 0.008042817 | 59.66645697 | 34.72447459 | Superficial | SOX2 + KLF5, SOX2 |
| 1474 | CREBBP    | 0.402571645 | 0.015054848 | 0.048140298 | 39.79409462 | 25.00942118 | Suprabasal  | SOX2              |
| 1475 | SMYD4     | 0.402425291 | 0.008904627 | 0.034252903 | 7.546562152 | 4.396569188 | Suprabasal  | SOX2              |
| 1476 | FAM204A   | 0.399857747 | 0.003462059 | 0.014108599 | 44.29048694 | 20.2946133  | Superficial | SOX2              |
| 1477 | SRBD1     | 0.399456503 | 0.007423146 | 0.030449933 | 14.79261982 | 9.197075729 | Suprabasal  | SOX2              |
| 1478 | HLA-E     | 0.399386809 | 0.002315114 | 0.020052792 | 91.46666117 | 75.79158387 | Basal       | SOX2              |
| 1479 | CUL1      | 0.398192813 | 0.007423146 | 0.030449933 | 40.65802972 | 25.80310235 | Suprabasal  | SOX2              |
| 1480 | PSMA5     | 0.398145724 | 0.021001058 | 0.04834985  | 65.47278703 | 39.48031861 | Superficial | SOX2              |
| 1481 | KAT5      | 0.396068142 | 0.005105016 | 0.018023407 | 28.64432152 | 13.29728154 | Superficial | SOX2              |
| 1482 | HDLBP     | 0.394837607 | 0.000401828 | 0.012455402 | 79.95998073 | 57.10289635 | Basal       | SOX2              |
| 1483 | ABC7      | 0.392337334 | 0.003462059 | 0.014108599 | 21.58574896 | 8.963636351 | Superficial | SOX2              |
| 1484 | LRRFIP1   | 0.391779281 | 0.000401828 | 0.012455402 | 76.39416407 | 54.39210723 | Basal       | SOX2              |
| 1485 | CAB39     | 0.391085547 | 0.008904627 | 0.040392504 | 38.52456553 | 21.76720296 | Basal       | SOX2              |
| 1486 | ZNF740    | 0.387806449 | 0.003462059 | 0.019729589 | 11.0501489  | 6.429114307 | Suprabasal  | SOX2              |
| 1487 | DNAJC5    | 0.387002103 | 0.006166656 | 0.032981404 | 30.47029786 | 16.50597108 | Basal       | SOX2              |
| 1488 | VBP1      | 0.386752618 | 0.021001058 | 0.04834985  | 48.30199504 | 24.9791918  | Superficial | SOX2              |
| 1489 | VGLL4     | 0.386286071 | 0.006166656 | 0.027303057 | 69.20123638 | 49.11019076 | Suprabasal  | SOX2              |
| 1490 | PPARD     | 0.385509275 | 0.005105016 | 0.029792864 | 13.50772511 | 7.152754309 | Basal       | SOX2              |
| 1491 | RAVER2    | 0.385020215 | 0.015054848 | 0.048140298 | 11.98122369 | 7.225062747 | Suprabasal  | SOX2              |
| 1492 | IQCK      | 0.384096874 | 0.015054848 | 0.048140298 | 7.59743852  | 4.233400157 | Suprabasal  | SOX2              |
| 1493 | CAP1      | 0.383283453 | 0.004211401 | 0.027185186 | 70.38203023 | 48.7778019  | Basal       | SOX2              |
| 1494 | PRCC      | 0.382064623 | 0.001883197 | 0.010234018 | 33.12701812 | 15.6260195  | Superficial | SOX2              |
| 1495 | SPINT2    | 0.381507478 | 0.017811616 | 0.043066688 | 89.89260612 | 77.91907541 | Superficial | SOX2              |
| 1496 | ATP6V1C1  | 0.38106856  | 0.004211401 | 0.021879278 | 29.29032455 | 18.23094114 | Suprabasal  | SOX2              |
| 1497 | HNRNPD    | 0.379637837 | 0.008904627 | 0.025990329 | 66.22805206 | 39.57404479 | Superficial | SOX2              |
| 1498 | EZH2      | 0.379576368 | 0.004211401 | 0.027185186 | 40.42867394 | 25.49765124 | Basal       | SOX2              |
| 1499 | ZFP64     | 0.37948406  | 0.010644787 | 0.038255467 | 12.40083125 | 7.455865285 | Suprabasal  | SOX2              |
| 1500 | GNL1      | 0.37843941  | 0.006166656 | 0.020290909 | 31.11718831 | 14.43086912 | Superficial | SOX2              |
| 1501 | CDK12     | 0.378351456 | 0.001526458 | 0.013290882 | 48.53275386 | 31.62280627 | Suprabasal  | SOX2              |
| 1502 | NCKAP1    | 0.378170379 | 0.010644787 | 0.044687249 | 58.11956911 | 37.04242786 | Basal       | SOX2              |
| 1503 | ZNF672    | 0.376681299 | 0.010644787 | 0.044687249 | 19.56555888 | 10.59380964 | Basal       | SOX2              |
| 1504 | POLR2B    | 0.37636934  | 0.012681065 | 0.042921737 | 41.3802777  | 24.66201886 | Suprabasal  | SOX2              |
| 1505 | GMCL1     | 0.375873197 | 0.007423146 | 0.022959455 | 31.99316097 | 14.72130798 | Superficial | SOX2              |
| 1506 | KCTD5     | 0.375183782 | 0.004211401 | 0.027185186 | 23.89015549 | 13.41836054 | Basal       | SOX2              |
| 1507 | GDE1      | 0.372793116 | 0.021001058 | 0.04834985  | 46.2836854  | 23.83445075 | Superficial | SOX2              |
| 1508 | HGS       | 0.372464258 | 0.002836074 | 0.022562695 | 37.66991891 | 21.6422198  | Basal       | SOX2              |
| 1509 | ACTR1A    | 0.372227417 | 0.004211401 | 0.027185186 | 36.13204977 | 21.11663527 | Basal       | SOX2              |
| 1510 | SRRT      | 0.371491622 | 0.001883197 | 0.014679007 | 37.76365529 | 23.85917939 | Suprabasal  | SOX2              |
| 1511 | TCFL5     | 0.371359147 | 0.000506425 | 0.010489143 | 8.353413253 | 4.994880006 | Suprabasal  | SOX2              |
| 1512 | ASB6      | 0.367944847 | 0.003462059 | 0.024854712 | 12.57515056 | 6.43489909  | Basal       | SOX2              |
| 1513 | DSN1      | 0.367401907 | 0.006166656 | 0.027303057 | 14.87864595 | 9.062953013 | Suprabasal  | SOX2              |
| 1514 | KLF5      | 0.366989473 | 0.004211401 | 0.016013117 | 90.73767968 | 78.42717769 | Superficial | KLF5, SOX2 + KLF5 |
| 1515 | UBE3B     | 0.365018038 | 0.010644787 | 0.044687249 | 22.00039008 | 11.50400949 | Basal       | SOX2              |
| 1516 | CLSPN     | 0.364721605 | 0.012681065 | 0.049425568 | 28.84436189 | 17.50717111 | Basal       | SOX2              |
| 1517 | EIF4ENIF1 | 0.364297387 | 0.000635975 | 0.010733065 | 22.31296889 | 13.97106774 | Suprabasal  | SOX2              |
| 1518 | C6orf132  | 0.363808744 | 0.001232925 | 0.015721789 | 47.99793227 | 30.24246367 | Basal       | SOX2              |
| 1519 | TMCC1     | 0.361299072 | 0.002836074 | 0.022562695 | 15.70166472 | 8.402344171 | Basal       | SOX2              |
| 1520 | SPATS2L   | 0.360680694 | 0.000992312 | 0.01142308  | 80.43917619 | 62.40270925 | Suprabasal  | KLF5              |
| 1521 | CD26      | 0.359851754 | 0.005105016 | 0.018023407 | 53.12997972 | 29.84803495 | Superficial | SOX2              |
| 1522 | HOOK2     | 0.359210707 | 0.021001058 | 0.04834985  | 48.76542349 | 25.87326508 | Superficial | SOX2              |
| 1523 | RASAL2    | 0.357863099 | 0.012681065 | 0.049425568 | 28.13204675 | 15.36324284 | Basal       | SOX2              |
| 1524 | GALE      | 0.357551358 | 0.010644787 | 0.044687249 | 38.86560774 | 23.09276026 | Basal       | SOX2              |
| 1525 | MASTL     | 0.355928529 | 0.010644787 | 0.044687249 | 22.26375576 | 12.5982032  | Basal       | SOX2              |
| 1526 | CUL4A     | 0.354110326 | 0.003462059 | 0.024854712 | 38.8403561  | 23.05650822 | Basal       | SOX2              |
| 1527 | TMOD3     | 0.353471008 | 0.010644787 | 0.044687249 | 73.12027102 | 52.13714682 | Basal       | SOX2              |
| 1528 | NUDT4     | 0.353268938 | 0.008904627 | 0.034252903 | 30.43480114 | 18.89608606 | Suprabasal  | SOX2, SOX2 + KLF5 |
| 1529 | XPO1      | 0.352059571 | 0.015054848 | 0.048140298 | 60.17473282 | 39.24143377 | Suprabasal  | SOX2              |
| 1530 | ZNF330    | 0.352054942 | 0.021001058 | 0.04834985  | 33.66922418 | 16.39634589 | Superficial | SOX2              |
| 1531 | TLK2      | 0.351292132 | 0.007423146 | 0.030449933 | 37.89732037 | 23.84071245 | Suprabasal  | SOX2              |

|               |             |             |             |             |                         |                   |
|---------------|-------------|-------------|-------------|-------------|-------------------------|-------------------|
| 1532 LONP1    | 0.351176435 | 0.010644787 | 0.044687249 | 27.96313576 | 15.97710597 Basal       | SOX2              |
| 1533 TADA2A   | 0.350900882 | 0.004211401 | 0.021879278 | 16.73317655 | 10.39759773 Suprabasal  | SOX2 + KLF5, SOX2 |
| 1534 UBAP1    | 0.348148108 | 0.012681065 | 0.049425568 | 28.3949319  | 15.61827932 Basal       | SOX2              |
| 1535 ETF1     | 0.347930763 | 0.012681065 | 0.049425568 | 64.85346179 | 43.8817305 Basal        | SOX2              |
| 1536 SIN3B    | 0.345189095 | 0.010644787 | 0.038255467 | 21.68181576 | 14.24138181 Suprabasal  | SOX2              |
| 1537 EHMT1    | 0.344749701 | 0.001232925 | 0.015721789 | 34.67135042 | 19.58732315 Basal       | SOX2              |
| 1538 NOM1     | 0.341602586 | 0.004211401 | 0.027185186 | 29.52543453 | 17.88515075 Basal       | SOX2              |
| 1539 DCAF7    | 0.341384602 | 0.021001058 | 0.04834985  | 34.97799652 | 16.46057478 Superficial | SOX2              |
| 1540 HECTD1   | 0.341197856 | 0.008904627 | 0.040392504 | 55.19918194 | 35.45256668 Basal       | SOX2              |
| 1541 ETAA1    | 0.34086341  | 0.002836074 | 0.0176927   | 18.78995792 | 11.89426174 Suprabasal  | SOX2              |
| 1542 FOXK2    | 0.340257957 | 0.000635975 | 0.012925379 | 28.52080745 | 15.8799137 Basal        | SOX2              |
| 1543 MPRIP    | 0.339903944 | 0.012681065 | 0.049425568 | 29.41008776 | 16.52158519 Basal       | SOX2              |
| 1544 ACTN4    | 0.337577641 | 0.010644787 | 0.044687249 | 82.9768807  | 62.57568151 Basal       | SOX2              |
| 1545 UOQLN1   | 0.337087049 | 0.007423146 | 0.036548425 | 47.23144812 | 28.48757739 Basal       | SOX2              |
| 1546 ZNF398   | 0.335352651 | 0.012681065 | 0.049425568 | 11.78243869 | 6.596489406 Basal       | SOX2              |
| 1547 PGRMC2   | 0.335234595 | 0.021001058 | 0.04834985  | 52.81530241 | 27.35480933 Superficial | SOX2              |
| 1548 BAG6     | 0.334098072 | 0.000635975 | 0.012925379 | 45.49164076 | 27.55833727 Basal       | SOX2              |
| 1549 CD2AP    | 0.328979616 | 0.007423146 | 0.036548425 | 55.36500458 | 35.22370908 Basal       | SOX2              |
| 1550 MARK3    | 0.328532891 | 0.001232925 | 0.015721789 | 39.36693965 | 23.67234087 Basal       | SOX2              |
| 1551 BTBD10   | 0.324843477 | 0.012681065 | 0.049425568 | 37.09246296 | 21.95821711 Basal       | SOX2              |
| 1552 RAF1     | 0.324610208 | 0.010644787 | 0.044687249 | 37.95147784 | 22.23152954 Basal       | SOX2              |
| 1553 SNX9     | 0.323080903 | 0.003462059 | 0.024854712 | 31.57020056 | 18.17767224 Basal       | SOX2              |
| 1554 RNF126   | 0.321893513 | 0.012681065 | 0.049425568 | 56.94156687 | 36.51439612 Basal       | SOX2              |
| 1555 NCAPD3   | 0.319375719 | 0.005105016 | 0.029792864 | 37.33730953 | 23.54175813 Basal       | SOX2              |
| 1556 TPD52L1  | 0.319203489 | 0.012681065 | 0.049425568 | 70.8735422  | 49.83127217 Basal       | SOX2              |
| 1557 TADA2B   | 0.318377235 | 0.007423146 | 0.036548425 | 11.44702194 | 6.08819351 Basal        | SOX2              |
| 1558 RAD21    | 0.317255801 | 0.007423146 | 0.036548425 | 72.37467016 | 51.73760027 Basal       | SOX2              |
| 1559 DPP9     | 0.316281208 | 0.005105016 | 0.029792864 | 24.5146002  | 13.78317029 Basal       | SOX2              |
| 1560 DHX15    | 0.315489463 | 0.010644787 | 0.038255467 | 50.30688361 | 33.87821156 Suprabasal  | SOX2              |
| 1561 PRRC2C   | 0.314883273 | 0.007423146 | 0.030449933 | 87.62866402 | 72.69746995 Suprabasal  | SOX2              |
| 1562 AKAP8    | 0.314009175 | 0.005105016 | 0.024262694 | 26.62854161 | 16.76378779 Suprabasal  | SOX2              |
| 1563 DNAAF5   | 0.313393642 | 0.004211401 | 0.027185186 | 25.39436291 | 14.69899341 Basal       | SOX2              |
| 1564 CSNK1A1  | 0.311878468 | 0.002836074 | 0.0176927   | 93.53449428 | 84.71976112 Suprabasal  | SOX2              |
| 1565 MIS18BP1 | 0.311634917 | 0.005105016 | 0.024262694 | 39.65562411 | 24.88374556 Suprabasal  | SOX2              |
| 1566 ANKRD11  | 0.311535163 | 0.005105016 | 0.024262694 | 77.75687683 | 59.74175098 Suprabasal  | SOX2              |
| 1567 SUPT5H   | 0.311462565 | 0.010644787 | 0.044687249 | 41.30614259 | 23.88312125 Basal       | SOX2              |
| 1568 PRKCH    | 0.310775043 | 0.010644787 | 0.044687249 | 12.78922278 | 7.133312113 Basal       | SOX2, SOX2 + KLF5 |
| 1569 ANXA11   | 0.309510653 | 0.007423146 | 0.036548425 | 80.1395934  | 59.90618267 Basal       | SOX2 + KLF5       |
| 1570 SMARCA2  | 0.30736207  | 0.012681065 | 0.042921737 | 50.47896445 | 33.01055583 Suprabasal  | SOX2              |
| 1571 RBM26    | 0.306807667 | 0.004211401 | 0.021879278 | 45.24969731 | 28.33994468 Suprabasal  | SOX2              |
| 1572 EDC3     | 0.305267304 | 0.003462059 | 0.024854712 | 13.40354087 | 7.180247317 Basal       | SOX2              |
| 1573 ACTB     | 0.304849735 | 0.004211401 | 0.027185186 | 99.71378693 | 97.52395914 Basal       | SOX2              |
| 1574 RNASEL   | 0.304812706 | 0.008904627 | 0.034252903 | 20.4978733  | 13.22398589 Suprabasal  | SOX2              |
| 1575 PRRG4    | 0.303894969 | 0.006166656 | 0.027303057 | 83.56882003 | 69.16067751 Suprabasal  | SOX2, SOX2 + KLF5 |
| 1576 CNDP2    | 0.301775633 | 0.007423146 | 0.036548425 | 41.87890185 | 25.30966965 Basal       | SOX2              |
| 1577 PPM1A    | 0.297552231 | 0.010644787 | 0.044687249 | 31.80766749 | 17.79182567 Basal       | SOX2              |
| 1578 PCM1     | 0.29663167  | 0.012681065 | 0.042921737 | 62.41064601 | 43.03776245 Suprabasal  | SOX2              |
| 1579 XRCC1    | 0.296049831 | 0.012681065 | 0.042921737 | 16.1532907  | 10.76767722 Suprabasal  | SOX2              |
| 1580 PTBP1    | 0.294116815 | 0.005105016 | 0.029792864 | 65.2690628  | 44.63874797 Basal       | SOX2              |
| 1581 RNF40    | 0.292210922 | 0.002836074 | 0.022562695 | 23.01616376 | 12.95846387 Basal       | SOX2              |
| 1582 INTS14   | 0.291042279 | 0.012681065 | 0.042921737 | 21.96252873 | 13.69680143 Suprabasal  | SOX2              |
| 1583 UBTF     | 0.289426243 | 0.004211401 | 0.021879278 | 55.33188696 | 37.74718139 Suprabasal  | SOX2              |
| 1584 BDH1     | 0.287800194 | 0.001526458 | 0.016792744 | 37.68427329 | 23.60581804 Basal       | SOX2              |
| 1585 ZNF174   | 0.285899464 | 0.006166656 | 0.027303057 | 6.81185006  | 4.65851935 Suprabasal   | SOX2              |
| 1586 TAX1BP1  | 0.28569555  | 0.006166656 | 0.032981404 | 70.90543279 | 49.84024475 Basal       | SOX2              |
| 1587 OPA3     | 0.285098991 | 0.015054848 | 0.048140298 | 18.78897384 | 12.76558836 Suprabasal  | SOX2              |
| 1588 KPNA4    | 0.284385351 | 0.008904627 | 0.040392504 | 53.03150064 | 33.71170895 Basal       | SOX2              |
| 1589 CSNK1D   | 0.282246278 | 0.006166656 | 0.032981404 | 38.6253149  | 23.71317908 Basal       | SOX2              |
| 1590 C6orf136 | 0.282069153 | 0.003462059 | 0.024854712 | 25.12174217 | 14.50978536 Basal       | SOX2 + KLF5       |
| 1591 KDM2A    | 0.281821164 | 0.005105016 | 0.029792864 | 44.65559244 | 26.94707233 Basal       | SOX2              |
| 1592 NFX1     | 0.281778885 | 0.008904627 | 0.034252903 | 30.94818377 | 19.69308165 Suprabasal  | SOX2              |
| 1593 KAT7     | 0.280513646 | 0.003462059 | 0.019729589 | 31.96355226 | 20.50682651 Suprabasal  | SOX2              |
| 1594 ZNF623   | 0.278474992 | 0.005105016 | 0.024262694 | 10.25246344 | 6.504611864 Suprabasal  | SOX2              |
| 1595 PSMD2    | 0.278455513 | 0.017811616 | 0.043066688 | 64.95891017 | 40.28973587 Superficial | SOX2              |
| 1596 SYNRG    | 0.277856083 | 0.008904627 | 0.040392504 | 27.18815891 | 15.59211998 Basal       | SOX2              |
| 1597 CDKN2AIP | 0.27405597  | 0.003462059 | 0.024854712 | 48.78322567 | 32.15435898 Basal       | SOX2              |
| 1598 APLP2    | 0.270292897 | 0.012681065 | 0.042921737 | 73.82533826 | 57.93670449 Suprabasal  | SOX2              |
| 1599 SF3A1    | 0.268950282 | 0.002315114 | 0.020052792 | 40.45425161 | 24.11803561 Basal       | SOX2              |
| 1600 DNAAF9   | 0.267541983 | 0.008904627 | 0.034252903 | 36.74656251 | 23.59342056 Suprabasal  | SOX2              |
| 1601 PAWR     | 0.266458622 | 0.010644787 | 0.044687249 | 63.09732871 | 43.42629148 Basal       | SOX2              |
| 1602 CTCF     | 0.266102688 | 0.010644787 | 0.038255467 | 50.85548206 | 33.85027116 Suprabasal  | SOX2              |
| 1603 SMC3     | 0.265657661 | 0.010644787 | 0.038255467 | 66.24412926 | 45.72828955 Suprabasal  | SOX2              |
| 1604 PAFAH1B2 | 0.265099423 | 0.006166656 | 0.032981404 | 49.89534049 | 31.20887734 Basal       | SOX2              |

|             |             |             |             |             |                         |                   |
|-------------|-------------|-------------|-------------|-------------|-------------------------|-------------------|
| 1605 DDA1   | 0.264148216 | 0.004211401 | 0.027185186 | 39.59917761 | 24.07286753 Basal       | SOX2              |
| 1606 BRD4   | 0.260587942 | 0.010644787 | 0.044687249 | 59.06233998 | 38.69743774 Basal       | SOX2              |
| 1607 EPN1   | 0.259066852 | 0.004211401 | 0.027185186 | 52.19066592 | 33.7144443 Basal        | SOX2              |
| 1608 NFKB1B | 0.258046044 | 0.010644787 | 0.044687249 | 27.74931509 | 16.39772077 Basal       | SOX2              |
| 1609 ELF1   | 0.257772111 | 0.006166656 | 0.027303057 | 78.78518903 | 61.89883688 Suprabasal  | SOX2              |
| 1610 SAFB2  | 0.256603266 | 0.006166656 | 0.027303057 | 33.63209571 | 21.6889824 Suprabasal   | SOX2              |
| 1611 SPINT1 | 0.251117707 | 0.008904627 | 0.040392504 | 62.93750767 | 43.57976501 Basal       | SOX2              |
| 1612 LSM12  | 0.248991693 | 0.002836074 | 0.022562695 | 57.64303137 | 37.74858485 Basal       | SOX2              |
| 1613 RAD23B | 0.233829178 | 0.012681065 | 0.049425568 | 69.23893558 | 49.60189286 Basal       | SOX2              |
| 1614 ANP32E | 0.232016051 | 0.012681065 | 0.049425568 | 57.77117902 | 40.06006791 Basal       | SOX2              |
| 1615 RBM15B | 0.231504327 | 0.008904627 | 0.040392504 | 28.6956174  | 17.30885728 Basal       | SOX2              |
| 1616 RIOK1  | 0.229649382 | 0.012681065 | 0.049425568 | 45.19160897 | 29.09861844 Basal       | SOX2              |
| 1617 BSG    | 0.229322399 | 0.008904627 | 0.040392504 | 86.2205218  | 68.15708431 Basal       | SOX2              |
| 1618 TCERG1 | 0.229183326 | 0.010644787 | 0.044687249 | 47.17707217 | 30.39663149 Basal       | SOX2              |
| 1619 BAZ1A  | 0.226783923 | 0.005105016 | 0.029792864 | 67.80402219 | 47.92001143 Basal       | SOX2              |
| 1620 RAP2A  | 0.219584981 | 0.012681065 | 0.049425568 | 20.63551863 | 12.4165553 Basal        | SOX2, SOX2 + KLF5 |
| 1621 SEC23B | 0.206323525 | 0.008904627 | 0.040392504 | 26.53475501 | 15.84923426 Basal       | SOX2              |
| 1622 USP16  | 0.202143273 | 0.006166656 | 0.020290909 | 55.11025916 | 31.92112904 Superficial | SOX2              |
| 1623 LUC7L  | 0.193345812 | 0.017811616 | 0.043066688 | 24.87083467 | 12.73663129 Superficial | SOX2              |
| 1624 FBXO7  | 0.178143875 | 0.010644787 | 0.038255467 | 43.93005609 | 30.99583959 Suprabasal  | SOX2              |
| 1625 CNOT2  | 0.164714044 | 0.015054848 | 0.048140298 | 57.84791185 | 42.11150241 Suprabasal  | SOX2              |

**Supplemental Table 8.** Gene expression profile of EoE DEGs known to be regulated by the SOX2-KLF5 interaction.

| gene         | Log2FC   | Pval     | FDR_Pval | Compartment |
|--------------|----------|----------|----------|-------------|
| 1 NRXN1      | 5.011065 | 0.000184 | 0.010398 | Suprabasal  |
| 2 NFATC2     | 4.981012 | 0.000989 | 0.008043 | Superficial |
| 3 KCNJ2      | 4.494243 | 0.000506 | 0.010398 | Suprabasal  |
| 4 BCL2L15    | 4.350032 | 0.000154 | 0.010398 | Suprabasal  |
| 5 RUNX2      | 3.769129 | 0.000505 | 0.007179 | Superficial |
| 6 LYPD6B     | 3.712118 | 0.004211 | 0.016013 | Superficial |
| 7 SGK1       | 3.680086 | 0.000154 | 0.007176 | Superficial |
| 8 ST8SIA6    | 3.5861   | 0.000634 | 0.007275 | Superficial |
| 9 CMYA5      | 3.552817 | 0.001526 | 0.009387 | Superficial |
| 10 HRH1      | 3.502635 | 0.000992 | 0.011395 | Suprabasal  |
| 11 TNS4      | 2.993108 | 0.001233 | 0.00868  | Superficial |
| 12 RASGRP1   | 2.869247 | 0.000506 | 0.010398 | Suprabasal  |
| 13 LY75      | 2.675558 | 5.55E-05 | 0.007176 | Superficial |
| 14 HS3ST3A1  | 2.549606 | 0.003462 | 0.014109 | Superficial |
| 15 HS3ST1    | 2.54417  | 0.000154 | 0.010398 | Suprabasal  |
| 16 RARB      | 2.530013 | 0.000992 | 0.008043 | Superficial |
| 17 CLDN1     | 2.4188   | 0.000506 | 0.007179 | Superficial |
| 18 LITAF     | 2.418478 | 0.000402 | 0.010398 | Suprabasal  |
| 19 NRP2      | 2.366104 | 0.001233 | 0.012403 | Suprabasal  |
| 20 SOX21     | 2.296942 | 0.000506 | 0.007179 | Superficial |
| 21 GGH       | 2.238839 | 0.000318 | 0.007176 | Superficial |
| 22 UTRN      | 2.217242 | 0.000196 | 0.007176 | Superficial |
| 23 MYOF      | 2.181333 | 0.000796 | 0.007615 | Superficial |
| 24 GIPC2     | 2.130797 | 0.00012  | 0.007176 | Superficial |
| 25 MYH9      | 2.016182 | 0.000402 | 0.007176 | Superficial |
| 26 PDLIM4    | 1.989624 | 0.000318 | 0.007176 | Superficial |
| 27 NUAK2     | 1.982932 | 0.001233 | 0.00868  | Superficial |
| 28 LPCAT4    | 1.972938 | 0.000796 | 0.007615 | Superficial |
| 29 LRRC8B    | 1.948757 | 0.001526 | 0.009387 | Superficial |
| 30 TLE1      | 1.923102 | 0.00012  | 0.007176 | Superficial |
| 31 SGMS2     | 1.870786 | 0.000402 | 0.007176 | Superficial |
| 32 FMN1      | 1.866941 | 0.000992 | 0.008043 | Superficial |
| 33 GCNT3     | 1.859067 | 0.002315 | 0.016077 | Suprabasal  |
| 34 SERPINB5  | 1.819859 | 0.000506 | 0.007179 | Superficial |
| 35 ARHGAP26  | 1.751173 | 7.20E-05 | 0.007176 | Superficial |
| 36 ADAM9     | 1.728379 | 0.001233 | 0.012403 | Suprabasal  |
| 37 IGF2R     | 1.719943 | 0.000992 | 0.008043 | Superficial |
| 38 ATP8B1    | 1.711098 | 9.30E-05 | 0.010398 | Suprabasal  |
| 39 FAM3C     | 1.692974 | 0.000992 | 0.008043 | Superficial |
| 40 CD9       | 1.664881 | 0.000318 | 0.007176 | Superficial |
| 41 DSG3      | 1.659685 | 0.000402 | 0.007176 | Superficial |
| 42 SERPINB2  | 1.591511 | 0.000636 | 0.010421 | Suprabasal  |
| 43 MACF1     | 1.585173 | 0.001883 | 0.010234 | Superficial |
| 44 Tmprss11l | 1.540082 | 0.008905 | 0.040393 | Basal       |
| 45 NRIP1     | 1.527775 | 0.000992 | 0.008043 | Superficial |
| 46 SETBP1    | 1.526392 | 0.000796 | 0.007615 | Superficial |
| 47 MYH14     | 1.506037 | 0.000636 | 0.007275 | Superficial |
| 48 MCC       | 1.495164 | 0.001233 | 0.00868  | Superficial |
| 49 SLC16A7   | 1.49266  | 0.000318 | 0.007176 | Superficial |
| 50 EEA1      | 1.47964  | 0.000196 | 0.007176 | Superficial |

|     |           |          |          |          |             |
|-----|-----------|----------|----------|----------|-------------|
| 51  | KLF4      | 1.451647 | 0.000318 | 0.007176 | Superficial |
| 52  | RAB11FIP1 | 1.442201 | 0.000318 | 0.012455 | Basal       |
| 53  | ETS2      | 1.44046  | 0.000318 | 0.010398 | Suprabasal  |
| 54  | TJP2      | 1.428787 | 0.00025  | 0.012455 | Basal       |
| 55  | FAM83B    | 1.409211 | 0.005105 | 0.018023 | Superficial |
| 56  | ANGPTL4   | 1.390768 | 9.30E-05 | 0.012455 | Basal       |
| 57  | OCIAD2    | 1.316919 | 0.000796 | 0.007615 | Superficial |
| 58  | ARHGAP18  | 1.313209 | 0.001526 | 0.009387 | Superficial |
| 59  | ERC1      | 1.308853 | 0.000992 | 0.008043 | Superficial |
| 60  | SOX13     | 1.301876 | 0.004211 | 0.016013 | Superficial |
| 61  | TMPRSS4   | 1.291648 | 0.000318 | 0.012455 | Basal       |
| 62  | PDE4D     | 1.288243 | 0.003462 | 0.014109 | Superficial |
| 63  | SHROOM2   | 1.258271 | 0.000636 | 0.007275 | Superficial |
| 64  | MREG      | 1.217755 | 0.000402 | 0.012455 | Basal       |
| 65  | MBOAT2    | 1.213442 | 0.000796 | 0.013643 | Basal       |
| 66  | ROCK2     | 1.208618 | 0.001233 | 0.00868  | Superficial |
| 67  | LIMA1     | 1.205073 | 0.001233 | 0.00868  | Superficial |
| 68  | SLC25A24  | 1.202476 | 0.002836 | 0.012662 | Superficial |
| 69  | MYO10     | 1.191689 | 0.000636 | 0.007275 | Superficial |
| 70  | AFF1      | 1.191218 | 0.001526 | 0.009387 | Superficial |
| 71  | MLLT3     | 1.184495 | 0.002836 | 0.012662 | Superficial |
| 72  | MEIS1     | 1.17702  | 0.000992 | 0.008043 | Superficial |
| 73  | PARP12    | 1.170055 | 0.000636 | 0.012925 | Basal       |
| 74  | RAPGEF5   | 1.16116  | 0.000402 | 0.007176 | Superficial |
| 75  | BARX2     | 1.154142 | 0.000318 | 0.007176 | Superficial |
| 76  | TP63      | 1.146853 | 0.006167 | 0.020291 | Superficial |
| 77  | B4GALNT3  | 1.142849 | 0.012681 | 0.033478 | Superficial |
| 78  | RPS6KA3   | 1.13976  | 0.001233 | 0.00868  | Superficial |
| 79  | ROBO2     | 1.132995 | 0.007423 | 0.022959 | Superficial |
| 80  | FOXQ1     | 1.123032 | 0.000992 | 0.011395 | Suprabasal  |
| 81  | ACVR1     | 1.112086 | 0.010645 | 0.029507 | Superficial |
| 82  | SLC5A3    | 1.108546 | 0.017812 | 0.043067 | Superficial |
| 83  | EPHB6     | 1.098421 | 0.002315 | 0.011381 | Superficial |
| 84  | CRYZ      | 1.092202 | 0.001883 | 0.010234 | Superficial |
| 85  | TGFBR1    | 1.082553 | 0.017812 | 0.043067 | Superficial |
| 86  | VCL       | 1.068577 | 0.000402 | 0.010398 | Suprabasal  |
| 87  | IFIH1     | 1.055273 | 0.002315 | 0.016077 | Suprabasal  |
| 88  | RAB11FIP2 | 1.05154  | 0.004211 | 0.016013 | Superficial |
| 89  | CLDN4     | 1.046614 | 0.003462 | 0.024855 | Basal       |
| 90  | GBP2      | 1.043537 | 0.006167 | 0.020291 | Superficial |
| 91  | PDZRN3    | 1.038845 | 0.005105 | 0.018023 | Superficial |
| 92  | GJB5      | 1.036529 | 0.012681 | 0.033478 | Superficial |
| 93  | USP12     | 1.026388 | 0.001233 | 0.012403 | Suprabasal  |
| 94  | LMTK2     | 0.992633 | 0.002315 | 0.016077 | Suprabasal  |
| 95  | ITGB8     | 0.982346 | 0.012681 | 0.043322 | Suprabasal  |
| 96  | RNF19A    | 0.979825 | 0.00025  | 0.010398 | Suprabasal  |
| 97  | EFNB2     | 0.971029 | 0.002315 | 0.011381 | Superficial |
| 98  | CCDC88C   | 0.960891 | 0.008905 | 0.02599  | Superficial |
| 99  | MBNL3     | 0.951778 | 0.005105 | 0.018023 | Superficial |
| 100 | GPHN      | 0.950352 | 0.005105 | 0.018023 | Superficial |
| 101 | PKP1      | 0.940526 | 0.005105 | 0.018023 | Superficial |
| 102 | ATXN1     | 0.939973 | 0.008905 | 0.02599  | Superficial |



|     |         |          |          |          |             |
|-----|---------|----------|----------|----------|-------------|
| 103 | TNK2    | 0.921896 | 0.005105 | 0.02473  | Suprabasal  |
| 104 | SMPD3   | 0.918832 | 0.012681 | 0.033478 | Superficial |
| 105 | ANK3    | 0.913275 | 0.012681 | 0.033478 | Superficial |
| 106 | SLC4A7  | 0.9      | 0.017812 | 0.043067 | Superficial |
| 107 | ST14    | 0.895367 | 7.20E-05 | 0.012455 | Basal       |
| 108 | EPN2    | 0.893136 | 0.000796 | 0.007615 | Superficial |
| 109 | KRT19   | 0.89218  | 0.012681 | 0.043322 | Suprabasal  |
| 110 | BMPR2   | 0.892138 | 0.001883 | 0.010234 | Superficial |
| 111 | TNRC18  | 0.889206 | 0.017812 | 0.043067 | Superficial |
| 112 | FAM110C | 0.886645 | 0.000506 | 0.010398 | Suprabasal  |
| 113 | LMO7    | 0.886093 | 0.002315 | 0.016077 | Suprabasal  |
| 114 | NOL10   | 0.882089 | 0.015055 | 0.03801  | Superficial |
| 115 | RNF19B  | 0.881491 | 0.000506 | 0.012899 | Basal       |
| 116 | UGCG    | 0.880956 | 0.000318 | 0.012455 | Basal       |
| 117 | BTG1    | 0.874641 | 7.20E-05 | 0.007176 | Superficial |
| 118 | ALCAM   | 0.848191 | 0.007423 | 0.022959 | Superficial |
| 119 | DTNBP1  | 0.846795 | 0.021001 | 0.04835  | Superficial |
| 120 | MAP3K8  | 0.845745 | 0.004211 | 0.027185 | Basal       |
| 121 | MACC1   | 0.834418 | 0.001883 | 0.018415 | Basal       |
| 122 | DNMBP   | 0.834005 | 0.017812 | 0.043067 | Superficial |
| 123 | NDFIP2  | 0.829957 | 0.000636 | 0.010421 | Suprabasal  |
| 124 | DSC3    | 0.826851 | 0.021001 | 0.04835  | Superficial |
| 125 | TWF2    | 0.823549 | 0.000992 | 0.008043 | Superficial |
| 126 | PPL     | 0.822802 | 0.000318 | 0.012455 | Basal       |
| 127 | ACAD9   | 0.822606 | 0.000402 | 0.007176 | Superficial |
| 128 | PIM1    | 0.816683 | 0.000506 | 0.012899 | Basal       |
| 129 | TNIP1   | 0.799214 | 0.000506 | 0.010398 | Suprabasal  |
| 130 | BACE2   | 0.792111 | 0.000506 | 0.010398 | Suprabasal  |
| 131 | PLS1    | 0.792064 | 0.002836 | 0.018003 | Suprabasal  |
| 132 | KCTD1   | 0.79082  | 0.000796 | 0.007615 | Superficial |
| 133 | KLF3    | 0.788074 | 0.000402 | 0.010398 | Suprabasal  |
| 134 | DSP     | 0.784191 | 0.000506 | 0.012899 | Basal       |
| 135 | RASSF6  | 0.780974 | 0.021001 | 0.04835  | Superficial |
| 136 | IL15    | 0.76698  | 0.007423 | 0.030891 | Suprabasal  |
| 137 | CRADD   | 0.748668 | 0.007423 | 0.022959 | Superficial |
| 138 | FAM53B  | 0.742226 | 0.002836 | 0.018003 | Suprabasal  |
| 139 | ACOX1   | 0.738899 | 0.007423 | 0.030891 | Suprabasal  |
| 140 | ELF3    | 0.738836 | 0.003462 | 0.019935 | Suprabasal  |
| 141 | ARFGAP3 | 0.737415 | 0.004211 | 0.016013 | Superficial |
| 142 | ZFAND5  | 0.732781 | 0.000636 | 0.010421 | Suprabasal  |
| 143 | EZR     | 0.727427 | 0.002315 | 0.020053 | Basal       |
| 144 | KHDRBS3 | 0.710488 | 0.000636 | 0.012925 | Basal       |
| 145 | MIPEP   | 0.707167 | 0.021001 | 0.04835  | Superficial |
| 146 | SHROOM3 | 0.695336 | 0.007423 | 0.036548 | Basal       |
| 147 | FCHSD2  | 0.691176 | 0.007423 | 0.030891 | Suprabasal  |
| 148 | TXNRD1  | 0.681193 | 0.004211 | 0.022366 | Suprabasal  |
| 149 | SGMS1   | 0.679916 | 0.00025  | 0.010398 | Suprabasal  |
| 150 | ANXA11  | 0.668315 | 0.000402 | 0.010398 | Suprabasal  |
| 151 | MAL2    | 0.666972 | 0.000992 | 0.014321 | Basal       |
| 152 | B3GNT2  | 0.659309 | 0.015055 | 0.03801  | Superficial |
| 153 | ILVBL   | 0.64809  | 0.021001 | 0.04835  | Superficial |
| 154 | PACS1   | 0.624994 | 0.000636 | 0.012925 | Basal       |

|     |          |          |          |          |             |
|-----|----------|----------|----------|----------|-------------|
| 155 | RIN2     | 0.623406 | 0.002836 | 0.018003 | Suprabasal  |
| 156 | TTC39C   | 0.619828 | 0.017812 | 0.043067 | Superficial |
| 157 | NDUFA4   | 0.617621 | 0.007423 | 0.022959 | Superficial |
| 158 | LMNA     | 0.616183 | 0.002315 | 0.011381 | Superficial |
| 159 | JUN      | 0.612848 | 0.010645 | 0.029507 | Superficial |
| 160 | NCOR2    | 0.603984 | 0.005105 | 0.02473  | Suprabasal  |
| 161 | RAP2B    | 0.602605 | 0.012681 | 0.043322 | Suprabasal  |
| 162 | MGAT4A   | 0.589002 | 0.00025  | 0.010398 | Suprabasal  |
| 163 | HS6ST1   | 0.587523 | 0.001883 | 0.01459  | Suprabasal  |
| 164 | IPMK     | 0.585907 | 0.008905 | 0.034888 | Suprabasal  |
| 165 | PAIP2B   | 0.580739 | 0.021001 | 0.04835  | Superficial |
| 166 | SPPL3    | 0.573635 | 0.003462 | 0.014109 | Superficial |
| 167 | TULP3    | 0.561441 | 0.000154 | 0.010398 | Suprabasal  |
| 168 | RAB27B   | 0.555356 | 0.002315 | 0.011381 | Superficial |
| 169 | RERE     | 0.55374  | 0.002315 | 0.016077 | Suprabasal  |
| 170 | RRP12    | 0.55344  | 0.001233 | 0.015722 | Basal       |
| 171 | JUP      | 0.548641 | 0.000796 | 0.013643 | Basal       |
| 172 | TRIP10   | 0.52718  | 0.000796 | 0.013643 | Basal       |
| 173 | ANXA1    | 0.526355 | 0.010645 | 0.044687 | Basal       |
| 174 | MPZL1    | 0.508728 | 0.008905 | 0.02599  | Superficial |
| 175 | EHF      | 0.492196 | 0.010645 | 0.03891  | Suprabasal  |
| 176 | TRIM33   | 0.48945  | 0.017812 | 0.043067 | Superficial |
| 177 | AHNAK    | 0.472581 | 0.000992 | 0.014321 | Basal       |
| 178 | THUMPD2  | 0.452637 | 0.021001 | 0.04835  | Superficial |
| 179 | STK38    | 0.448032 | 0.001526 | 0.013166 | Suprabasal  |
| 180 | FNBP1    | 0.44158  | 0.003462 | 0.019935 | Suprabasal  |
| 181 | EIF4G3   | 0.421872 | 0.012681 | 0.033478 | Superficial |
| 182 | PLD1     | 0.416621 | 0.010645 | 0.044687 | Basal       |
| 183 | BAIAP2L1 | 0.414982 | 0.000992 | 0.014321 | Basal       |
| 184 | SMG7     | 0.408191 | 0.015055 | 0.048244 | Suprabasal  |
| 185 | DNAJC21  | 0.403618 | 0.000992 | 0.008043 | Superficial |
| 186 | N4BP1    | 0.398064 | 0.000992 | 0.011395 | Suprabasal  |
| 187 | TULP4    | 0.387329 | 0.001526 | 0.013166 | Suprabasal  |
| 188 | SETD5    | 0.37761  | 0.005105 | 0.02473  | Suprabasal  |
| 189 | CAPN2    | 0.368913 | 0.015055 | 0.048244 | Suprabasal  |
| 190 | KLF5     | 0.366989 | 0.004211 | 0.016013 | Superficial |
| 191 | PARD3    | 0.323073 | 0.002836 | 0.018003 | Suprabasal  |
| 192 | PHACTR4  | 0.321553 | 0.015055 | 0.048244 | Suprabasal  |
| 193 | PRKCH    | 0.310775 | 0.010645 | 0.044687 | Basal       |
| 194 | C6orf136 | 0.282069 | 0.003462 | 0.024855 | Basal       |
| 195 | ASAH1    | -0.26554 | 0.008905 | 0.040393 | Basal       |
| 196 | IL20RB   | -0.32366 | 0.012681 | 0.043322 | Suprabasal  |
| 197 | CTSZ     | -0.33085 | 0.010645 | 0.044687 | Basal       |
| 198 | SLC1A4   | -0.54385 | 0.004211 | 0.027185 | Basal       |
| 199 | MPPED2   | -0.68819 | 0.012681 | 0.049426 | Basal       |
| 200 | PTGR1    | -0.71596 | 0.001883 | 0.018415 | Basal       |
| 201 | TGFBI    | -0.82612 | 0.001526 | 0.016793 | Basal       |
| 202 | SPRY1    | -0.83185 | 0.008905 | 0.034888 | Suprabasal  |
| 203 | FHL2     | -0.95479 | 0.000318 | 0.012455 | Basal       |
| 204 | EPCAM    | -1.00287 | 0.021001 | 0.04835  | Superficial |
| 205 | LFNG     | -1.0368  | 0.000992 | 0.014321 | Basal       |
| 206 | ANKH     | -1.06814 | 0.00012  | 0.012455 | Basal       |

|     |         |          |          |          |             |
|-----|---------|----------|----------|----------|-------------|
| 207 | ARMCX1  | -1.10077 | 0.000318 | 0.012455 | Basal       |
| 208 | SORBS2  | -1.12594 | 0.000636 | 0.012925 | Basal       |
| 209 | CYR1    | -1.22211 | 0.001883 | 0.018415 | Basal       |
| 210 | PFN2    | -1.24968 | 0.000796 | 0.013643 | Basal       |
| 211 | EFEMP1  | -1.26834 | 0.000196 | 0.012455 | Basal       |
| 212 | TGM3    | -1.39805 | 0.001883 | 0.01459  | Suprabasal  |
| 213 | SYT17   | -1.41193 | 0.008905 | 0.02599  | Superficial |
| 214 | GHR     | -1.42445 | 0.00025  | 0.012455 | Basal       |
| 215 | STXBP1  | -1.60505 | 0.006167 | 0.020291 | Superficial |
| 216 | ALOX12  | -1.64626 | 0.012681 | 0.043322 | Suprabasal  |
| 217 | NGEF    | -1.69712 | 0.000992 | 0.011395 | Suprabasal  |
| 218 | ZNF365  | -1.72312 | 0.008905 | 0.02599  | Superficial |
| 219 | PLB1    | -1.80572 | 0.001883 | 0.010234 | Superficial |
| 220 | DHRS9   | -2.3798  | 0.00025  | 0.007176 | Superficial |
| 221 | TGM7    | -2.41928 | 0.010171 | 0.029507 | Superficial |
| 222 | IL1A    | -2.49769 | 0.003462 | 0.014109 | Superficial |
| 223 | RAI14   | -2.77967 | 0.000318 | 0.007176 | Superficial |
| 224 | SULT1B1 | -3.33906 | 0.000183 | 0.007176 | Superficial |

**Supplemental Table 9.** List of antibodies used in the study.

| <b>Antibody</b> | <b>Company</b>           | <b>Catalog #</b> | <b>Assay</b>     | <b>Concentration</b> | <b>Secondary / Conjugate</b> |
|-----------------|--------------------------|------------------|------------------|----------------------|------------------------------|
| anti-KI-67      | Abcam                    | 16667            | IHC              | 1:100                | goat anti-rabbit             |
| anti-SOX2       | Cell Signaling           | 14962S           | IHC              | 1:500                | goat anti-rabbit             |
| anti-KLF5       | Sigma-Aldrich            | HPA040398        | IHC              | 1:150                | goat anti-rabbit             |
| anti-KRT14      | Cell Signaling           | 48020            | Multispectral IF | 1:200                | Opal 540                     |
| anti-P63        | ABclonal                 | A19652           | Multispectral IF | 1:100                | Opal 690                     |
| anti-IVL        | Santa Cruz Biotechnology | sc-21748         | Multispectral IF | 1:500                | Opal 520                     |
| anti-CNFN       | Novus Biologicals        | NBP2-14668       | Multispectral IF | 1:200                | Opal 570                     |
